# Supplementary material for: MYOD1 inhibits avian adipocyte differentiation via miRNA-206/KLF4 axis
Source: J Anim Sci Biotechnol. 2021 May 5;12:55. doi: 10.1186/s40104-021-00579-x (PMC8101123; doi:10.1186/s40104-021-00579-x)
Supplement: Supplementary file 1 — Additional file 1: Table S1. Primer sequences used for the PCR and qPCR analysis. [file 40104_2021_579_MOESM1_ESM.xlsx]

## Sheet: Sheet1
Species	Gene	Primer for Plasmid construction	Tm(℃)	Length(bp)
gallus	MYOD1	Forward：5'-caggaattcgccaccatggacttactgggcc-3'	60.1	924
		Reverse：5'-ctcgtcgacttatagcacttggtagattg-3'	60.5
	KLF4	Forward：5'-caggaattcccggcgcggatgcggcagcc-3'	60.1	1404
		Reverse：5'-ctcgtcgacttaaaagtgcctcttcatgt-3'	60.5
	pGL4.0(-1876bp)	Forward：5'-tttaccaacagtaccggattgccaagctctggagaggcagcatttctc-3'	60.7	1897
		Reverse：5'-ctaactggccggtacctgagctcgctagggaagggaccccaaagatta-3'	62.6
	pGL4.0(-1234bp)	Forward：5'-ctaactggccggtacctgagctcgctaccattccccctcctgtttat-3'	62.9	1235
		Reverse：5'-ctaactggccggtacctgagctcgctagggaagggaccccaaagatta-3'	62.6
	pmirGLO	Forward：5'-ccggagctcaacatacgttttaaag-3'	61	201
		Reverse：5'-ccfgtcgacggaatgtcatttccccgtgta-3'	61.3
	CAS9-sgRNA1	Forward：5'-caccgcgacccgtgcttcaacacgt-3'	60.1	25
		Reverse：5'-aaacacgtgttgaagcacgggtcgc-3'	60.8
	CAS9-sgRNA2	Forward：5'-caccgcggctcagcaaggtcaacg-3'	61.1	24
		Reverse：5'-aaaccgttgaccttgctgagccgc-3'	58.6
Species	Gene	Primers for verifing MYOD1 DNA sequence	Tm(℃)	Length(bp)
Gallus	MYOD1	Forward：5'-cacagccaccctctggac-3'	58.92	688
		Reverse：5'-gctctgctgctggactacaa-3'	58.8
Species	Gene	Primers for Qpcr	Tm(℃)	Length(bp)
Gallus	MYOD1	Forward：5'-agctctcgcaggagaaacag-3'	59.95	160
		Reverse：5'-ctggaggcagtatgggacat-3'	59.97
	PPARγ	Forward：5'-gatcgcccaggtttgttaaa-3'	59.96	167
		Reverse：5'-tgcacgtgttccgttacaat-3'	59.64
	FABP4	Forward：5'-acagtggcacactgaagcag-3'	59.9	75
		Reverse：5'-tcccatccaccacttttctc-3'	59.63
	KLF4	Forward：5'-cccacacaggtgagaaacct-3'	60	149
		Reverse：5'-cgacctggaaaatgctctgt-3'	60.25
	C/EBPα	Forward：5'-ggagcaagccaacttctacg-3'	60.45	181
		Reverse：5'-gtcgatggagtgctcgttct-3'	60.2
	C/EBPβ	Forward：5'-attacgaggcggactgtttg-3'	60.13	86
		Reverse：5'-ccctacggtaagttcggtca-3'	59.99
	miR-1	Forward：5'-gtccccttcaaccagctgt-3'	60	76
	miR-133a	Reverse：5'-gcgggctggtaaaatggaaccaaat-3'	60.25	82
	miR-133b	Reverse：5'-cgctggaatgtaaagaagtatg-3'	57.76	79
	miR-206	Forward：5'-tggaatgtaaggaagtgtgtgg-3'	58.68	79
	U6	Forward：5'-cgatacagagaagattagcatggcccctgc-3'	60.42	87
	GAPDH	Forward：5'-cctctctggcaaagtccaag-3'	59.92	200
		Reverse：5'-catctgcccatttgatgttg-3'	59.98
