# Supplementary material for: MYOD1 inhibits avian adipocyte differentiation via miRNA-206/KLF4 axis
Source: J Anim Sci Biotechnol. 2021 May 5;12:55. doi: 10.1186/s40104-021-00579-x (PMC8101123; doi:10.1186/s40104-021-00579-x)
Supplement: Supplementary file 4 — Additional file 4: Table S3. GO analysis of DEGs in MYOD1OE cells vs. MYOD1NC cells and MYOD1KO cells vs. MYOD1NC on day 0. [file 40104_2021_579_MOESM4_ESM.xlsx]

## Sheet: MYOD1OE VS MYOD1NC UP
GroupID	Category	Term	Description	LogP	Log(q-value)	InTerm_InList	Genes	Symbols
1_Summary	GO Biological Processes	GO:0001568	blood vessel development	-15.4081	-11.195	74/777	25,59,163,196,207,388,538,657,659,688,857,1012,1295,1432,1634,1906,1948,1958,1960,2034,2113,2191,2294,2335,3082,3091,3164,3516,3685,3696,3716,4015,4017,4215,4313,4627,4638,5125,5140,5156,5168,5294,6659,6688,6789,7046,7048,7049,7058,7082,7477,8828,8829,9444,9451,9510,10365,10413,10512,10672,22846,23328,23493,54453,55742,57381,79602,83700,84168,90993,154810,204851,219699,441478,623,1398,2149,2241,2…	ABL1,ACTA2,AP2B1,AHR,AKT1,RHOB,ATP7A,BMPR1A,BMPR2,KLF5,CAV1,CDH13,COL8A1,MAPK14,DCN,EDN1,EFNB2,EGR1,EGR3,EPAS1,ETS1,FAP,FOXF1,FN1,HGF,HIF1A,NR4A1,RBPJ,ITGAV,ITGB8,JAK1,LOX,LOXL2,MAP3K3,MMP2,MYH9,MYLK,PCSK5,PDE3B,PDGFRA,ENPP2,PIK3CG,SOX4,SPI1,STK4,TGFBR1,TGFBR2,TGFBR3,THBS2,TJP1,WNT7B,NRP2,NRP1,QKI,EIF2AK3,ADAMTS1,KLF2,YAP1,SEMA3C,GNA13,VASH1,SASH1,HEY2,RIN2,PARVA,RHOJ,ADIPOR2,JAM3,ANTXR1,CREB3L1,…
1_Member	GO Biological Processes	GO:0001568	blood vessel development	-15.4081	-11.195	74/777	25,59,163,196,207,388,538,657,659,688,857,1012,1295,1432,1634,1906,1948,1958,1960,2034,2113,2191,2294,2335,3082,3091,3164,3516,3685,3696,3716,4015,4017,4215,4313,4627,4638,5125,5140,5156,5168,5294,6659,6688,6789,7046,7048,7049,7058,7082,7477,8828,8829,9444,9451,9510,10365,10413,10512,10672,22846,23328,23493,54453,55742,57381,79602,83700,84168,90993,154810,204851,219699,441478	ABL1,ACTA2,AP2B1,AHR,AKT1,RHOB,ATP7A,BMPR1A,BMPR2,KLF5,CAV1,CDH13,COL8A1,MAPK14,DCN,EDN1,EFNB2,EGR1,EGR3,EPAS1,ETS1,FAP,FOXF1,FN1,HGF,HIF1A,NR4A1,RBPJ,ITGAV,ITGB8,JAK1,LOX,LOXL2,MAP3K3,MMP2,MYH9,MYLK,PCSK5,PDE3B,PDGFRA,ENPP2,PIK3CG,SOX4,SPI1,STK4,TGFBR1,TGFBR2,TGFBR3,THBS2,TJP1,WNT7B,NRP2,NRP1,QKI,EIF2AK3,ADAMTS1,KLF2,YAP1,SEMA3C,GNA13,VASH1,SASH1,HEY2,RIN2,PARVA,RHOJ,ADIPOR2,JAM3,ANTXR1,CREB3L1,…
1_Member	GO Biological Processes	GO:0048514	blood vessel morphogenesis	-13.8633	-9.95115	66/690	25,207,388,657,659,688,857,1012,1295,1432,1634,1906,1948,1960,2034,2113,2191,2294,2335,3082,3091,3164,3516,3685,3696,3716,4015,4017,4215,4313,4627,4638,5140,5156,5168,5294,6659,6688,6789,7046,7048,7049,7058,7082,7477,8828,8829,9444,9451,9510,10365,10413,10672,22846,23328,23493,54453,55742,57381,79602,83700,90993,154810,204851,219699,441478	ABL1,AKT1,RHOB,BMPR1A,BMPR2,KLF5,CAV1,CDH13,COL8A1,MAPK14,DCN,EDN1,EFNB2,EGR3,EPAS1,ETS1,FAP,FOXF1,FN1,HGF,HIF1A,NR4A1,RBPJ,ITGAV,ITGB8,JAK1,LOX,LOXL2,MAP3K3,MMP2,MYH9,MYLK,PDE3B,PDGFRA,ENPP2,PIK3CG,SOX4,SPI1,STK4,TGFBR1,TGFBR2,TGFBR3,THBS2,TJP1,WNT7B,NRP2,NRP1,QKI,EIF2AK3,ADAMTS1,KLF2,YAP1,GNA13,VASH1,SASH1,HEY2,RIN2,PARVA,RHOJ,ADIPOR2,JAM3,CREB3L1,AMOTL1,HIPK1,UNC5B,NRARP
1_Member	GO Biological Processes	GO:0030335	positive regulation of cell migration	-10.5374	-7.47035	52/560	25,207,388,538,623,659,857,1012,1398,1432,1906,2113,2149,2241,2294,2335,2651,3082,3091,3554,3643,3655,3685,3717,4088,4215,4249,4638,5156,5168,5530,5962,6546,6789,7046,7048,7082,8772,8826,8828,8829,8895,9043,9510,10512,10631,23328,54453,57381,57580,84913,154810	ABL1,AKT1,RHOB,ATP7A,BDKRB1,BMPR2,CAV1,CDH13,CRK,MAPK14,EDN1,ETS1,F2R,FER,FOXF1,FN1,GCNT2,HGF,HIF1A,IL1R1,INSR,ITGA6,ITGAV,JAK2,SMAD3,MAP3K3,MGAT5,MYLK,PDGFRA,ENPP2,PPP3CA,RDX,SLC8A1,STK4,TGFBR1,TGFBR2,TJP1,FADD,IQGAP1,NRP2,NRP1,CPNE3,SPAG9,ADAMTS1,SEMA3C,POSTN,SASH1,RIN2,RHOJ,PREX1,ATOH8,AMOTL1
1_Member	GO Biological Processes	GO:0001525	angiogenesis	-10.0854	-7.04839	53/594	25,207,388,688,857,1012,1295,1432,1634,1906,1948,1960,2034,2113,2191,2335,3082,3091,3164,3516,3685,3696,3716,4017,4215,4313,4627,5140,5156,5168,5294,6789,7046,7048,7058,7082,8828,8829,9451,9510,10365,10672,22846,23328,55742,57381,79602,83700,90993,154810,204851,219699,441478	ABL1,AKT1,RHOB,KLF5,CAV1,CDH13,COL8A1,MAPK14,DCN,EDN1,EFNB2,EGR3,EPAS1,ETS1,FAP,FN1,HGF,HIF1A,NR4A1,RBPJ,ITGAV,ITGB8,JAK1,LOXL2,MAP3K3,MMP2,MYH9,PDE3B,PDGFRA,ENPP2,PIK3CG,STK4,TGFBR1,TGFBR2,THBS2,TJP1,NRP2,NRP1,EIF2AK3,ADAMTS1,KLF2,GNA13,VASH1,SASH1,PARVA,RHOJ,ADIPOR2,JAM3,CREB3L1,AMOTL1,HIPK1,UNC5B,NRARP
1_Member	GO Biological Processes	GO:2000147	positive regulation of cell motility	-9.87262	-6.8636	52/584	25,207,388,538,623,659,857,1012,1398,1432,1906,2113,2149,2241,2294,2335,2651,3082,3091,3554,3643,3655,3685,3717,4088,4215,4249,4638,5156,5168,5530,5962,6546,6789,7046,7048,7082,8772,8826,8828,8829,8895,9043,9510,10512,10631,23328,54453,57381,57580,84913,154810	ABL1,AKT1,RHOB,ATP7A,BDKRB1,BMPR2,CAV1,CDH13,CRK,MAPK14,EDN1,ETS1,F2R,FER,FOXF1,FN1,GCNT2,HGF,HIF1A,IL1R1,INSR,ITGA6,ITGAV,JAK2,SMAD3,MAP3K3,MGAT5,MYLK,PDGFRA,ENPP2,PPP3CA,RDX,SLC8A1,STK4,TGFBR1,TGFBR2,TJP1,FADD,IQGAP1,NRP2,NRP1,CPNE3,SPAG9,ADAMTS1,SEMA3C,POSTN,SASH1,RIN2,RHOJ,PREX1,ATOH8,AMOTL1
1_Member	GO Biological Processes	GO:0040017	positive regulation of locomotion	-9.61277	-6.6549	53/612	25,207,388,538,623,659,857,1012,1398,1432,1906,2113,2149,2241,2294,2335,2651,3082,3091,3554,3643,3655,3685,3717,4088,4215,4249,4638,5156,5168,5530,5962,6546,6789,7046,7048,7082,8772,8826,8828,8829,8895,9043,9510,10512,10631,23328,54453,57381,57580,79720,84913,154810	ABL1,AKT1,RHOB,ATP7A,BDKRB1,BMPR2,CAV1,CDH13,CRK,MAPK14,EDN1,ETS1,F2R,FER,FOXF1,FN1,GCNT2,HGF,HIF1A,IL1R1,INSR,ITGA6,ITGAV,JAK2,SMAD3,MAP3K3,MGAT5,MYLK,PDGFRA,ENPP2,PPP3CA,RDX,SLC8A1,STK4,TGFBR1,TGFBR2,TJP1,FADD,IQGAP1,NRP2,NRP1,CPNE3,SPAG9,ADAMTS1,SEMA3C,POSTN,SASH1,RIN2,RHOJ,PREX1,VPS37B,ATOH8,AMOTL1
1_Member	GO Biological Processes	GO:0051272	positive regulation of cellular component movement	-9.42736	-6.50261	52/601	25,207,388,538,623,659,857,1012,1398,1432,1906,2113,2149,2241,2294,2335,2651,3082,3091,3554,3643,3655,3685,3717,4088,4215,4249,4638,5156,5168,5530,5962,6546,6789,7046,7048,7082,8772,8826,8828,8829,8895,9043,9510,10512,10631,23328,54453,57381,57580,84913,154810	ABL1,AKT1,RHOB,ATP7A,BDKRB1,BMPR2,CAV1,CDH13,CRK,MAPK14,EDN1,ETS1,F2R,FER,FOXF1,FN1,GCNT2,HGF,HIF1A,IL1R1,INSR,ITGA6,ITGAV,JAK2,SMAD3,MAP3K3,MGAT5,MYLK,PDGFRA,ENPP2,PPP3CA,RDX,SLC8A1,STK4,TGFBR1,TGFBR2,TJP1,FADD,IQGAP1,NRP2,NRP1,CPNE3,SPAG9,ADAMTS1,SEMA3C,POSTN,SASH1,RIN2,RHOJ,PREX1,ATOH8,AMOTL1
1_Member	GO Biological Processes	GO:0090130	tissue migration	-6.5541	-4.21602	33/368	25,59,207,388,411,659,1012,1432,1634,1906,1948,1960,2113,2191,2294,3091,3164,4017,4163,4215,4627,5168,5586,7046,7048,8828,8829,22846,23328,54453,57381,84913,154810	ABL1,ACTA2,AKT1,RHOB,ARSB,BMPR2,CDH13,MAPK14,DCN,EDN1,EFNB2,EGR3,ETS1,FAP,FOXF1,HIF1A,NR4A1,LOXL2,MCC,MAP3K3,MYH9,ENPP2,PKN2,TGFBR1,TGFBR2,NRP2,NRP1,VASH1,SASH1,RIN2,RHOJ,ATOH8,AMOTL1
1_Member	GO Biological Processes	GO:0010631	epithelial cell migration	-5.84551	-3.6494	31/359	25,207,388,411,659,1012,1432,1634,1906,1948,1960,2113,2191,3091,3164,4017,4163,4215,4627,5168,5586,7046,7048,8828,8829,22846,23328,54453,57381,84913,154810	ABL1,AKT1,RHOB,ARSB,BMPR2,CDH13,MAPK14,DCN,EDN1,EFNB2,EGR3,ETS1,FAP,HIF1A,NR4A1,LOXL2,MCC,MAP3K3,MYH9,ENPP2,PKN2,TGFBR1,TGFBR2,NRP2,NRP1,VASH1,SASH1,RIN2,RHOJ,ATOH8,AMOTL1
1_Member	GO Biological Processes	GO:0001667	ameboidal-type cell migration	-5.83112	-3.64736	37/472	25,207,388,411,659,1012,1432,1634,1906,1948,1960,2113,2191,2241,2335,2697,3091,3164,4017,4163,4215,4627,5168,5586,6385,6546,7046,7048,8828,8829,10512,22846,23328,54453,57381,84913,154810	ABL1,AKT1,RHOB,ARSB,BMPR2,CDH13,MAPK14,DCN,EDN1,EFNB2,EGR3,ETS1,FAP,FER,FN1,GJA1,HIF1A,NR4A1,LOXL2,MCC,MAP3K3,MYH9,ENPP2,PKN2,SDC4,SLC8A1,TGFBR1,TGFBR2,NRP2,NRP1,SEMA3C,VASH1,SASH1,RIN2,RHOJ,ATOH8,AMOTL1
1_Member	GO Biological Processes	GO:0090132	epithelium migration	-5.76949	-3.60167	31/362	25,207,388,411,659,1012,1432,1634,1906,1948,1960,2113,2191,3091,3164,4017,4163,4215,4627,5168,5586,7046,7048,8828,8829,22846,23328,54453,57381,84913,154810	ABL1,AKT1,RHOB,ARSB,BMPR2,CDH13,MAPK14,DCN,EDN1,EFNB2,EGR3,ETS1,FAP,HIF1A,NR4A1,LOXL2,MCC,MAP3K3,MYH9,ENPP2,PKN2,TGFBR1,TGFBR2,NRP2,NRP1,VASH1,SASH1,RIN2,RHOJ,ATOH8,AMOTL1
1_Member	GO Biological Processes	GO:0043542	endothelial cell migration	-5.57515	-3.47147	26/280	25,207,388,659,1012,1432,1634,1906,1948,1960,2113,2191,3091,3164,4017,4215,4627,7046,8828,8829,22846,23328,54453,57381,84913,154810	ABL1,AKT1,RHOB,BMPR2,CDH13,MAPK14,DCN,EDN1,EFNB2,EGR3,ETS1,FAP,HIF1A,NR4A1,LOXL2,MAP3K3,MYH9,TGFBR1,NRP2,NRP1,VASH1,SASH1,RIN2,RHOJ,ATOH8,AMOTL1
1_Member	GO Biological Processes	GO:0010595	positive regulation of endothelial cell migration	-5.12337	-3.13033	16/131	25,207,388,659,1432,1906,2113,3091,4215,8828,8829,23328,54453,57381,84913,154810	ABL1,AKT1,RHOB,BMPR2,MAPK14,EDN1,ETS1,HIF1A,MAP3K3,NRP2,NRP1,SASH1,RIN2,RHOJ,ATOH8,AMOTL1
1_Member	GO Biological Processes	GO:0010634	positive regulation of epithelial cell migration	-4.63733	-2.78402	18/175	25,207,388,659,1432,1906,2113,3091,4215,5168,7048,8828,8829,23328,54453,57381,84913,154810	ABL1,AKT1,RHOB,BMPR2,MAPK14,EDN1,ETS1,HIF1A,MAP3K3,ENPP2,TGFBR2,NRP2,NRP1,SASH1,RIN2,RHOJ,ATOH8,AMOTL1
1_Member	GO Biological Processes	GO:1901342	regulation of vasculature development	-3.49032	-1.90963	29/434	25,388,1634,1948,1958,2113,3082,3091,3696,3716,4215,4772,4773,4775,5140,5168,7048,7058,7082,8829,9510,10365,22846,23328,23493,54453,57381,90993,204851	ABL1,RHOB,DCN,EFNB2,EGR1,ETS1,HGF,HIF1A,ITGB8,JAK1,MAP3K3,NFATC1,NFATC2,NFATC3,PDE3B,ENPP2,TGFBR2,THBS2,TJP1,NRP1,ADAMTS1,KLF2,VASH1,SASH1,HEY2,RIN2,RHOJ,CREB3L1,HIPK1
1_Member	GO Biological Processes	GO:0010632	regulation of epithelial cell migration	-3.37539	-1.82025	22/297	25,207,388,411,659,1432,1634,1906,2113,3091,4163,4215,5168,7048,8828,8829,22846,23328,54453,57381,84913,154810	ABL1,AKT1,RHOB,ARSB,BMPR2,MAPK14,DCN,EDN1,ETS1,HIF1A,MCC,MAP3K3,ENPP2,TGFBR2,NRP2,NRP1,VASH1,SASH1,RIN2,RHOJ,ATOH8,AMOTL1
1_Member	GO Biological Processes	GO:0010594	regulation of endothelial cell migration	-3.05395	-1.58196	18/234	25,207,388,659,1432,1634,1906,2113,3091,4215,8828,8829,22846,23328,54453,57381,84913,154810	ABL1,AKT1,RHOB,BMPR2,MAPK14,DCN,EDN1,ETS1,HIF1A,MAP3K3,NRP2,NRP1,VASH1,SASH1,RIN2,RHOJ,ATOH8,AMOTL1
1_Member	GO Biological Processes	GO:0043536	positive regulation of blood vessel endothelial cell migration	-2.87453	-1.46572	9/80	25,207,1432,2113,3091,4215,8829,57381,154810	ABL1,AKT1,MAPK14,ETS1,HIF1A,MAP3K3,NRP1,RHOJ,AMOTL1
1_Member	GO Biological Processes	GO:1904018	positive regulation of vasculature development	-2.67063	-1.32258	17/233	25,388,1948,1958,2113,3082,3091,3696,3716,4215,7048,7082,8829,23328,54453,57381,204851	ABL1,RHOB,EFNB2,EGR1,ETS1,HGF,HIF1A,ITGB8,JAK1,MAP3K3,TGFBR2,TJP1,NRP1,SASH1,RIN2,RHOJ,HIPK1
1_Member	GO Biological Processes	GO:0043534	blood vessel endothelial cell migration	-2.47885	-1.16963	14/183	25,207,1432,1948,1960,2113,3091,3164,4215,4627,8829,22846,57381,154810	ABL1,AKT1,MAPK14,EFNB2,EGR3,ETS1,HIF1A,NR4A1,MAP3K3,MYH9,NRP1,VASH1,RHOJ,AMOTL1
1_Member	GO Biological Processes	GO:0045766	positive regulation of angiogenesis	-2.03396	-0.844065	14/206	25,388,2113,3082,3091,3696,3716,4215,7048,7082,8829,23328,57381,204851	ABL1,RHOB,ETS1,HGF,HIF1A,ITGB8,JAK1,MAP3K3,TGFBR2,TJP1,NRP1,SASH1,RHOJ,HIPK1
2_Summary	GO Biological Processes	GO:0061061	muscle structure development	-13.2481	-9.51203	64/676	25,207,467,627,657,688,857,1432,1634,1906,1948,1958,1959,1960,2034,2273,2294,2317,2353,2697,3486,3516,4000,4015,4088,4627,4638,4654,4772,4773,4775,5081,5156,5318,5530,5738,5915,6382,6443,6445,6497,6546,7046,7048,7049,7832,8321,8470,8516,8572,9043,9215,9444,10413,23028,23493,27295,29766,57591,59269,60529,221496,283078,389072,653,659,10512	ABL1,AKT1,ATF3,BDNF,BMPR1A,KLF5,CAV1,MAPK14,DCN,EDN1,EFNB2,EGR1,EGR2,EGR3,EPAS1,FHL1,FOXF1,FLNB,FOS,GJA1,IGFBP3,RBPJ,LMNA,LOX,SMAD3,MYH9,MYLK,MYOD1,NFATC1,NFATC2,NFATC3,PAX7,PDGFRA,PKP2,PPP3CA,PTGFRN,RARB,SDC1,SGCB,SGCG,SKI,SLC8A1,TGFBR1,TGFBR2,TGFBR3,BTG2,FZD1,SORBS2,ITGA8,PDLIM4,SPAG9,LARGE1,QKI,YAP1,KDM1A,HEY2,PDLIM3,TMOD3,MRTFA,HIVEP3,ALX4,LEMD2,MKX,PLEKHM3,BMP5,BMPR2,SEMA3C
2_Member	GO Biological Processes	GO:0061061	muscle structure development	-13.2481	-9.51203	64/676	25,207,467,627,657,688,857,1432,1634,1906,1948,1958,1959,1960,2034,2273,2294,2317,2353,2697,3486,3516,4000,4015,4088,4627,4638,4654,4772,4773,4775,5081,5156,5318,5530,5738,5915,6382,6443,6445,6497,6546,7046,7048,7049,7832,8321,8470,8516,8572,9043,9215,9444,10413,23028,23493,27295,29766,57591,59269,60529,221496,283078,389072	ABL1,AKT1,ATF3,BDNF,BMPR1A,KLF5,CAV1,MAPK14,DCN,EDN1,EFNB2,EGR1,EGR2,EGR3,EPAS1,FHL1,FOXF1,FLNB,FOS,GJA1,IGFBP3,RBPJ,LMNA,LOX,SMAD3,MYH9,MYLK,MYOD1,NFATC1,NFATC2,NFATC3,PAX7,PDGFRA,PKP2,PPP3CA,PTGFRN,RARB,SDC1,SGCB,SGCG,SKI,SLC8A1,TGFBR1,TGFBR2,TGFBR3,BTG2,FZD1,SORBS2,ITGA8,PDLIM4,SPAG9,LARGE1,QKI,YAP1,KDM1A,HEY2,PDLIM3,TMOD3,MRTFA,HIVEP3,ALX4,LEMD2,MKX,PLEKHM3
2_Member	GO Biological Processes	GO:0060537	muscle tissue development	-9.41472	-6.50261	41/409	467,653,657,659,688,857,1432,1634,1906,1948,1958,1959,2317,2353,2697,3516,4000,4015,4088,4638,4654,5081,5156,5318,5530,5915,6443,6445,6497,6546,7046,7048,7049,7832,8470,8516,10413,10512,23493,59269,221496	ATF3,BMP5,BMPR1A,BMPR2,KLF5,CAV1,MAPK14,DCN,EDN1,EFNB2,EGR1,EGR2,FLNB,FOS,GJA1,RBPJ,LMNA,LOX,SMAD3,MYLK,MYOD1,PAX7,PDGFRA,PKP2,PPP3CA,RARB,SGCB,SGCG,SKI,SLC8A1,TGFBR1,TGFBR2,TGFBR3,BTG2,SORBS2,ITGA8,YAP1,SEMA3C,HEY2,HIVEP3,LEMD2
2_Member	GO Biological Processes	GO:0014706	striated muscle tissue development	-8.95449	-6.1885	39/390	467,653,657,659,688,857,1432,1634,1906,1948,1958,1959,2317,2353,2697,3516,4000,4015,4088,4654,5081,5156,5318,5530,5915,6443,6445,6497,6546,7046,7048,7049,7832,8470,10413,10512,23493,59269,221496	ATF3,BMP5,BMPR1A,BMPR2,KLF5,CAV1,MAPK14,DCN,EDN1,EFNB2,EGR1,EGR2,FLNB,FOS,GJA1,RBPJ,LMNA,LOX,SMAD3,MYOD1,PAX7,PDGFRA,PKP2,PPP3CA,RARB,SGCB,SGCG,SKI,SLC8A1,TGFBR1,TGFBR2,TGFBR3,BTG2,SORBS2,YAP1,SEMA3C,HEY2,HIVEP3,LEMD2
2_Member	GO Biological Processes	GO:0007517	muscle organ development	-7.94942	-5.35718	38/406	467,657,688,857,1432,1634,1906,1948,1958,1959,1960,2273,2317,2353,2697,3516,4015,4088,4638,4654,5081,5318,5530,6443,6445,6497,7046,7048,7049,7832,8321,9215,10413,23493,59269,60529,221496,283078	ATF3,BMPR1A,KLF5,CAV1,MAPK14,DCN,EDN1,EFNB2,EGR1,EGR2,EGR3,FHL1,FLNB,FOS,GJA1,RBPJ,LOX,SMAD3,MYLK,MYOD1,PAX7,PKP2,PPP3CA,SGCB,SGCG,SKI,TGFBR1,TGFBR2,TGFBR3,BTG2,FZD1,LARGE1,YAP1,HEY2,HIVEP3,ALX4,LEMD2,MKX
2_Member	GO Biological Processes	GO:0060538	skeletal muscle organ development	-4.35641	-2.56486	17/167	467,688,857,1432,1634,1958,1959,2317,2353,4654,5081,5530,6497,7832,9215,59269,221496	ATF3,KLF5,CAV1,MAPK14,DCN,EGR1,EGR2,FLNB,FOS,MYOD1,PAX7,PPP3CA,SKI,BTG2,LARGE1,HIVEP3,LEMD2
2_Member	GO Biological Processes	GO:0007519	skeletal muscle tissue development	-4.10864	-2.36825	16/158	467,688,857,1432,1634,1958,1959,2317,2353,4654,5081,5530,6497,7832,59269,221496	ATF3,KLF5,CAV1,MAPK14,DCN,EGR1,EGR2,FLNB,FOS,MYOD1,PAX7,PPP3CA,SKI,BTG2,HIVEP3,LEMD2
2_Member	GO Biological Processes	GO:0035914	skeletal muscle cell differentiation	-4.04627	-2.32308	10/69	467,688,1958,1959,2353,4654,5081,7832,59269,221496	ATF3,KLF5,EGR1,EGR2,FOS,MYOD1,PAX7,BTG2,HIVEP3,LEMD2
3_Summary	GO Biological Processes	GO:0009611	response to wounding	-12.8118	-9.20072	64/691	538,688,857,960,1026,1398,1609,1634,1906,2113,2149,2162,2191,2192,2281,2294,2335,2697,2776,3091,3705,3717,4015,4088,4627,4638,4654,5081,5156,5294,5341,5530,5577,5592,5627,5738,6382,6385,7046,7048,7225,7414,8829,9215,9860,9927,10019,10413,10631,10672,11057,22846,23028,23186,23657,57591,64764,79602,79803,80274,83700,83999,84959,135228,288,3716,5318,5962,7357,8648,22841,57107,225,613,1843,3082,4925,…	ATP7A,KLF5,CAV1,CD44,CDKN1A,CRK,DGKQ,DCN,EDN1,ETS1,F2R,F13A1,FAP,FBLN1,FKBP1B,FOXF1,FN1,GJA1,GNAQ,HIF1A,ITPK1,JAK2,LOX,SMAD3,MYH9,MYLK,MYOD1,PAX7,PDGFRA,PIK3CG,PLEK,PPP3CA,PRKAR2B,PRKG1,PROS1,PTGFRN,SDC1,SDC4,TGFBR1,TGFBR2,TRPC6,VCL,NRP1,LARGE1,LRIG2,MFN2,SH2B3,YAP1,POSTN,GNA13,ABHD2,VASH1,KDM1A,RCOR1,SLC7A11,MRTFA,CREB3L2,ADIPOR2,HPS6,SCUBE1,JAM3,KREMEN1,UBASH3B,CD109,ANK3,JAK1,PKP2,RDX,UGCG,NCO…
3_Member	GO Biological Processes	GO:0009611	response to wounding	-12.8118	-9.20072	64/691	538,688,857,960,1026,1398,1609,1634,1906,2113,2149,2162,2191,2192,2281,2294,2335,2697,2776,3091,3705,3717,4015,4088,4627,4638,4654,5081,5156,5294,5341,5530,5577,5592,5627,5738,6382,6385,7046,7048,7225,7414,8829,9215,9860,9927,10019,10413,10631,10672,11057,22846,23028,23186,23657,57591,64764,79602,79803,80274,83700,83999,84959,135228	ATP7A,KLF5,CAV1,CD44,CDKN1A,CRK,DGKQ,DCN,EDN1,ETS1,F2R,F13A1,FAP,FBLN1,FKBP1B,FOXF1,FN1,GJA1,GNAQ,HIF1A,ITPK1,JAK2,LOX,SMAD3,MYH9,MYLK,MYOD1,PAX7,PDGFRA,PIK3CG,PLEK,PPP3CA,PRKAR2B,PRKG1,PROS1,PTGFRN,SDC1,SDC4,TGFBR1,TGFBR2,TRPC6,VCL,NRP1,LARGE1,LRIG2,MFN2,SH2B3,YAP1,POSTN,GNA13,ABHD2,VASH1,KDM1A,RCOR1,SLC7A11,MRTFA,CREB3L2,ADIPOR2,HPS6,SCUBE1,JAM3,KREMEN1,UBASH3B,CD109
3_Member	GO Biological Processes	GO:0042060	wound healing	-11.0827	-7.82383	54/576	688,857,960,1026,1398,1609,1634,1906,2113,2149,2162,2191,2192,2335,2697,2776,3091,3705,3717,4015,4088,4627,4638,4654,5081,5156,5294,5341,5530,5577,5592,5627,5738,6382,6385,7046,7048,7225,7414,9215,9927,10019,10413,10631,10672,23028,23186,23657,57591,79602,79803,80274,84959,135228	KLF5,CAV1,CD44,CDKN1A,CRK,DGKQ,DCN,EDN1,ETS1,F2R,F13A1,FAP,FBLN1,FN1,GJA1,GNAQ,HIF1A,ITPK1,JAK2,LOX,SMAD3,MYH9,MYLK,MYOD1,PAX7,PDGFRA,PIK3CG,PLEK,PPP3CA,PRKAR2B,PRKG1,PROS1,PTGFRN,SDC1,SDC4,TGFBR1,TGFBR2,TRPC6,VCL,LARGE1,MFN2,SH2B3,YAP1,POSTN,GNA13,KDM1A,RCOR1,SLC7A11,MRTFA,ADIPOR2,HPS6,SCUBE1,UBASH3B,CD109
3_Member	GO Biological Processes	GO:1903034	regulation of response to wounding	-7.18679	-4.73866	23/186	538,857,1026,1398,1906,2149,2191,2281,2697,4088,4627,4638,4654,5156,5341,5592,5627,7048,9860,10019,83999,84959,135228	ATP7A,CAV1,CDKN1A,CRK,EDN1,F2R,FAP,FKBP1B,GJA1,SMAD3,MYH9,MYLK,MYOD1,PDGFRA,PLEK,PRKG1,PROS1,TGFBR2,LRIG2,SH2B3,KREMEN1,UBASH3B,CD109
3_Member	GO Biological Processes	GO:0061041	regulation of wound healing	-6.03378	-3.79376	19/154	857,1026,1398,1906,2149,2191,2697,4088,4627,4638,4654,5156,5341,5592,5627,7048,10019,84959,135228	CAV1,CDKN1A,CRK,EDN1,F2R,FAP,GJA1,SMAD3,MYH9,MYLK,MYOD1,PDGFRA,PLEK,PRKG1,PROS1,TGFBR2,SH2B3,UBASH3B,CD109
3_Member	GO Biological Processes	GO:1903035	negative regulation of response to wounding	-5.86597	-3.66142	14/89	1026,1398,1906,2191,2697,4088,5156,5592,5627,9860,10019,83999,84959,135228	CDKN1A,CRK,EDN1,FAP,GJA1,SMAD3,PDGFRA,PRKG1,PROS1,LRIG2,SH2B3,KREMEN1,UBASH3B,CD109
3_Member	GO Biological Processes	GO:0034109	homotypic cell-cell adhesion	-5.40921	-3.33697	13/84	288,3716,4627,5156,5294,5318,5341,5592,5962,7414,10019,23657,84959	ANK3,JAK1,MYH9,PDGFRA,PIK3CG,PKP2,PLEK,PRKG1,RDX,VCL,SH2B3,SLC7A11,UBASH3B
3_Member	GO Biological Processes	GO:0061045	negative regulation of wound healing	-5.25563	-3.21274	12/74	1026,1398,1906,2191,2697,4088,5156,5592,5627,10019,84959,135228	CDKN1A,CRK,EDN1,FAP,GJA1,SMAD3,PDGFRA,PRKG1,PROS1,SH2B3,UBASH3B,CD109
3_Member	GO Biological Processes	GO:0007596	blood coagulation	-5.04947	-3.06677	28/336	857,1609,1906,2149,2162,2191,2192,2776,3705,3717,4627,5156,5294,5341,5577,5592,5627,7225,7414,9927,10019,10672,23028,23186,23657,79803,80274,84959	CAV1,DGKQ,EDN1,F2R,F13A1,FAP,FBLN1,GNAQ,ITPK1,JAK2,MYH9,PDGFRA,PIK3CG,PLEK,PRKAR2B,PRKG1,PROS1,TRPC6,VCL,MFN2,SH2B3,GNA13,KDM1A,RCOR1,SLC7A11,HPS6,SCUBE1,UBASH3B
3_Member	GO Biological Processes	GO:0007599	hemostasis	-4.93035	-2.99044	28/341	857,1609,1906,2149,2162,2191,2192,2776,3705,3717,4627,5156,5294,5341,5577,5592,5627,7225,7414,9927,10019,10672,23028,23186,23657,79803,80274,84959	CAV1,DGKQ,EDN1,F2R,F13A1,FAP,FBLN1,GNAQ,ITPK1,JAK2,MYH9,PDGFRA,PIK3CG,PLEK,PRKAR2B,PRKG1,PROS1,TRPC6,VCL,MFN2,SH2B3,GNA13,KDM1A,RCOR1,SLC7A11,HPS6,SCUBE1,UBASH3B
3_Member	GO Biological Processes	GO:0050817	coagulation	-4.90687	-2.97247	28/342	857,1609,1906,2149,2162,2191,2192,2776,3705,3717,4627,5156,5294,5341,5577,5592,5627,7225,7414,9927,10019,10672,23028,23186,23657,79803,80274,84959	CAV1,DGKQ,EDN1,F2R,F13A1,FAP,FBLN1,GNAQ,ITPK1,JAK2,MYH9,PDGFRA,PIK3CG,PLEK,PRKAR2B,PRKG1,PROS1,TRPC6,VCL,MFN2,SH2B3,GNA13,KDM1A,RCOR1,SLC7A11,HPS6,SCUBE1,UBASH3B
3_Member	GO Biological Processes	GO:0050878	regulation of body fluid levels	-4.37151	-2.57832	35/507	538,857,1609,1906,2149,2162,2191,2192,2697,2776,3091,3705,3717,4627,5156,5294,5341,5577,5592,5627,7225,7357,7414,8648,9927,10019,10672,22841,23028,23186,23657,57107,79803,80274,84959	ATP7A,CAV1,DGKQ,EDN1,F2R,F13A1,FAP,FBLN1,GJA1,GNAQ,HIF1A,ITPK1,JAK2,MYH9,PDGFRA,PIK3CG,PLEK,PRKAR2B,PRKG1,PROS1,TRPC6,UGCG,VCL,NCOA1,MFN2,SH2B3,GNA13,RAB11FIP2,KDM1A,RCOR1,SLC7A11,PDSS2,HPS6,SCUBE1,UBASH3B
3_Member	GO Biological Processes	GO:0070527	platelet aggregation	-3.81423	-2.1464	9/60	4627,5156,5294,5341,5592,7414,10019,23657,84959	MYH9,PDGFRA,PIK3CG,PLEK,PRKG1,VCL,SH2B3,SLC7A11,UBASH3B
3_Member	GO Biological Processes	GO:0032102	negative regulation of response to external stimulus	-3.78395	-2.12488	27/376	225,613,1026,1398,1843,1906,2113,2191,2294,2697,3082,4088,4925,5156,5592,5627,7850,8829,9860,10019,10512,55527,79102,83999,84959,135228,140885	ABCD2,BCR,CDKN1A,CRK,DUSP1,EDN1,ETS1,FAP,FOXF1,GJA1,HGF,SMAD3,NUCB2,PDGFRA,PRKG1,PROS1,IL1R2,NRP1,LRIG2,SH2B3,SEMA3C,FEM1A,RNF26,KREMEN1,UBASH3B,CD109,SIRPA
3_Member	GO Biological Processes	GO:0030193	regulation of blood coagulation	-3.64118	-2.02132	10/77	857,1906,2149,2191,5156,5341,5592,5627,10019,84959	CAV1,EDN1,F2R,FAP,PDGFRA,PLEK,PRKG1,PROS1,SH2B3,UBASH3B
3_Member	GO Biological Processes	GO:1900046	regulation of hemostasis	-3.59453	-1.98669	10/78	857,1906,2149,2191,5156,5341,5592,5627,10019,84959	CAV1,EDN1,F2R,FAP,PDGFRA,PLEK,PRKG1,PROS1,SH2B3,UBASH3B
3_Member	GO Biological Processes	GO:0034110	regulation of homotypic cell-cell adhesion	-3.5741	-1.97162	6/28	288,3716,5592,5962,10019,84959	ANK3,JAK1,PRKG1,RDX,SH2B3,UBASH3B
3_Member	GO Biological Processes	GO:0050818	regulation of coagulation	-3.41573	-1.85289	10/82	857,1906,2149,2191,5156,5341,5592,5627,10019,84959	CAV1,EDN1,F2R,FAP,PDGFRA,PLEK,PRKG1,PROS1,SH2B3,UBASH3B
3_Member	GO Biological Processes	GO:0030168	platelet activation	-3.18996	-1.67838	14/154	1609,2149,2776,4627,5156,5294,5341,5592,7225,7414,10019,10672,23657,84959	DGKQ,F2R,GNAQ,MYH9,PDGFRA,PIK3CG,PLEK,PRKG1,TRPC6,VCL,SH2B3,GNA13,SLC7A11,UBASH3B
3_Member	GO Biological Processes	GO:0030195	negative regulation of blood coagulation	-2.95377	-1.52094	7/49	1906,2191,5156,5592,5627,10019,84959	EDN1,FAP,PDGFRA,PRKG1,PROS1,SH2B3,UBASH3B
3_Member	GO Biological Processes	GO:0034111	negative regulation of homotypic cell-cell adhesion	-2.90866	-1.49417	4/15	5592,5962,10019,84959	PRKG1,RDX,SH2B3,UBASH3B
3_Member	GO Biological Processes	GO:1900047	negative regulation of hemostasis	-2.90072	-1.4876	7/50	1906,2191,5156,5592,5627,10019,84959	EDN1,FAP,PDGFRA,PRKG1,PROS1,SH2B3,UBASH3B
3_Member	GO Biological Processes	GO:0050819	negative regulation of coagulation	-2.74958	-1.37222	7/53	1906,2191,5156,5592,5627,10019,84959	EDN1,FAP,PDGFRA,PRKG1,PROS1,SH2B3,UBASH3B
3_Member	GO Biological Processes	GO:0010544	negative regulation of platelet activation	-2.50134	-1.18637	4/19	5156,5592,10019,84959	PDGFRA,PRKG1,SH2B3,UBASH3B
3_Member	GO Biological Processes	GO:0010543	regulation of platelet activation	-2.41667	-1.12389	5/32	5156,5341,5592,10019,84959	PDGFRA,PLEK,PRKG1,SH2B3,UBASH3B
3_Member	GO Biological Processes	GO:0090331	negative regulation of platelet aggregation	-2.19174	-0.963056	3/12	5592,10019,84959	PRKG1,SH2B3,UBASH3B
4_Summary	GO Biological Processes	GO:0009100	glycoprotein metabolic process	-12.5635	-9.04934	47/416	411,538,659,957,1634,2132,2590,2651,3091,4121,4124,4249,4864,5238,6400,6646,7358,7903,8869,9215,9334,9695,10090,11253,11320,22822,23275,26301,50515,55454,55790,57452,79586,80267,83857,84061,84899,113189,117248,133584,145173,147991,160335,256435,337876,340485,727936,272,3643,4060,5163,5165,6382,6385,7357,9061,54704,79646,83440,91373,122622,134145	ARSB,ATP7A,BMPR2,ENTPD5,DCN,EXT2,GALNT2,GCNT2,HIF1A,MAN1A1,MAN2A1,MGAT5,NPC1,PGM3,SEL1L,SOAT1,UGDH,ST8SIA4,ST3GAL5,LARGE1,B4GALT5,EDEM1,UST,MAN1B1,MGAT4A,PHLDA1,POFUT2,GBGT1,CHST11,CSGALNACT2,CSGALNACT1,GALNT16,CHPF,EDEM3,TMTC1,MAGT1,TMTC4,CHST14,GALNT15,EGFLAM,B3GLCT,DPY19L3,TMTC2,ST6GALNAC3,CHSY3,ACER2,GXYLT2,AMPD3,INSR,LUM,PDK1,PDK3,SDC1,SDC4,UGCG,PAPSS1,PDP1,PANK3,ADPGK,UAP1L1,ADSS1,ATPSCKMT
4_Member	GO Biological Processes	GO:0009100	glycoprotein metabolic process	-12.5635	-9.04934	47/416	411,538,659,957,1634,2132,2590,2651,3091,4121,4124,4249,4864,5238,6400,6646,7358,7903,8869,9215,9334,9695,10090,11253,11320,22822,23275,26301,50515,55454,55790,57452,79586,80267,83857,84061,84899,113189,117248,133584,145173,147991,160335,256435,337876,340485,727936	ARSB,ATP7A,BMPR2,ENTPD5,DCN,EXT2,GALNT2,GCNT2,HIF1A,MAN1A1,MAN2A1,MGAT5,NPC1,PGM3,SEL1L,SOAT1,UGDH,ST8SIA4,ST3GAL5,LARGE1,B4GALT5,EDEM1,UST,MAN1B1,MGAT4A,PHLDA1,POFUT2,GBGT1,CHST11,CSGALNACT2,CSGALNACT1,GALNT16,CHPF,EDEM3,TMTC1,MAGT1,TMTC4,CHST14,GALNT15,EGFLAM,B3GLCT,DPY19L3,TMTC2,ST6GALNAC3,CHSY3,ACER2,GXYLT2
4_Member	GO Biological Processes	GO:0009101	glycoprotein biosynthetic process	-12.4532	-9.0182	42/343	538,659,957,1634,2132,2590,2651,4121,4124,4249,4864,5238,6646,7358,7903,8869,9215,9334,10090,11253,11320,22822,23275,26301,50515,55454,55790,57452,79586,80267,83857,84061,84899,113189,117248,145173,147991,160335,256435,337876,340485,727936	ATP7A,BMPR2,ENTPD5,DCN,EXT2,GALNT2,GCNT2,MAN1A1,MAN2A1,MGAT5,NPC1,PGM3,SOAT1,UGDH,ST8SIA4,ST3GAL5,LARGE1,B4GALT5,UST,MAN1B1,MGAT4A,PHLDA1,POFUT2,GBGT1,CHST11,CSGALNACT2,CSGALNACT1,GALNT16,CHPF,EDEM3,TMTC1,MAGT1,TMTC4,CHST14,GALNT15,B3GLCT,DPY19L3,TMTC2,ST6GALNAC3,CHSY3,ACER2,GXYLT2
4_Member	GO Biological Processes	GO:1901137	carbohydrate derivative biosynthetic process	-8.09878	-5.4877	58/774	272,538,659,957,1634,2132,2590,2651,3091,3643,4060,4121,4124,4249,4864,5163,5165,5238,6382,6385,6646,7357,7358,7903,8869,9061,9215,9334,10090,11253,11320,22822,23275,26301,50515,54704,55454,55790,57452,79586,79646,80267,83440,83857,84061,84899,91373,113189,117248,122622,134145,145173,147991,160335,256435,337876,340485,727936	AMPD3,ATP7A,BMPR2,ENTPD5,DCN,EXT2,GALNT2,GCNT2,HIF1A,INSR,LUM,MAN1A1,MAN2A1,MGAT5,NPC1,PDK1,PDK3,PGM3,SDC1,SDC4,SOAT1,UGCG,UGDH,ST8SIA4,ST3GAL5,PAPSS1,LARGE1,B4GALT5,UST,MAN1B1,MGAT4A,PHLDA1,POFUT2,GBGT1,CHST11,PDP1,CSGALNACT2,CSGALNACT1,GALNT16,CHPF,PANK3,EDEM3,ADPGK,TMTC1,MAGT1,TMTC4,UAP1L1,CHST14,GALNT15,ADSS1,ATPSCKMT,B3GLCT,DPY19L3,TMTC2,ST6GALNAC3,CHSY3,ACER2,GXYLT2
4_Member	GO Biological Processes	GO:0006486	protein glycosylation	-7.93686	-5.35718	29/258	957,2132,2590,2651,4121,4124,4249,4864,5238,7903,8869,9215,9334,11253,11320,23275,26301,57452,80267,83857,84061,84899,117248,145173,147991,160335,256435,340485,727936	ENTPD5,EXT2,GALNT2,GCNT2,MAN1A1,MAN2A1,MGAT5,NPC1,PGM3,ST8SIA4,ST3GAL5,LARGE1,B4GALT5,MAN1B1,MGAT4A,POFUT2,GBGT1,GALNT16,EDEM3,TMTC1,MAGT1,TMTC4,GALNT15,B3GLCT,DPY19L3,TMTC2,ST6GALNAC3,ACER2,GXYLT2
4_Member	GO Biological Processes	GO:0043413	macromolecule glycosylation	-7.93686	-5.35718	29/258	957,2132,2590,2651,4121,4124,4249,4864,5238,7903,8869,9215,9334,11253,11320,23275,26301,57452,80267,83857,84061,84899,117248,145173,147991,160335,256435,340485,727936	ENTPD5,EXT2,GALNT2,GCNT2,MAN1A1,MAN2A1,MGAT5,NPC1,PGM3,ST8SIA4,ST3GAL5,LARGE1,B4GALT5,MAN1B1,MGAT4A,POFUT2,GBGT1,GALNT16,EDEM3,TMTC1,MAGT1,TMTC4,GALNT15,B3GLCT,DPY19L3,TMTC2,ST6GALNAC3,ACER2,GXYLT2
4_Member	GO Biological Processes	GO:0070085	glycosylation	-7.49547	-4.9813	29/270	957,2132,2590,2651,4121,4124,4249,4864,5238,7903,8869,9215,9334,11253,11320,23275,26301,57452,80267,83857,84061,84899,117248,145173,147991,160335,256435,340485,727936	ENTPD5,EXT2,GALNT2,GCNT2,MAN1A1,MAN2A1,MGAT5,NPC1,PGM3,ST8SIA4,ST3GAL5,LARGE1,B4GALT5,MAN1B1,MGAT4A,POFUT2,GBGT1,GALNT16,EDEM3,TMTC1,MAGT1,TMTC4,GALNT15,B3GLCT,DPY19L3,TMTC2,ST6GALNAC3,ACER2,GXYLT2
4_Member	GO Biological Processes	GO:0006493	protein O-linked glycosylation	-3.21053	-1.69635	12/119	2590,5238,9215,9334,23275,57452,83857,84899,117248,145173,160335,727936	GALNT2,PGM3,LARGE1,B4GALT5,POFUT2,GALNT16,TMTC1,TMTC4,GALNT15,B3GLCT,TMTC2,GXYLT2
5_Summary	GO Biological Processes	GO:0007507	heart development	-11.72	-8.35196	56/589	163,653,657,659,1026,1363,1432,1906,1948,2294,2697,3091,3516,3643,4000,4015,4088,4772,5125,5156,5318,5681,5915,6443,6445,6546,6586,6659,6789,7046,7048,7049,8321,8470,8572,8828,8829,9510,9645,10087,10252,10395,10413,10512,23118,23493,27295,54806,55130,55717,55742,79602,80114,80274,221496,341640,207,6532,26524,55841,59,2042,2335,2651,3082,4017,23275,64839,4638,5660,4313,3717,4654,5081	AP2B1,BMP5,BMPR1A,BMPR2,CDKN1A,CPE,MAPK14,EDN1,EFNB2,FOXF1,GJA1,HIF1A,RBPJ,INSR,LMNA,LOX,SMAD3,NFATC1,PCSK5,PDGFRA,PKP2,PSKH1,RARB,SGCB,SGCG,SLC8A1,SLIT3,SOX4,STK4,TGFBR1,TGFBR2,TGFBR3,FZD1,SORBS2,PDLIM4,NRP2,NRP1,ADAMTS1,MICAL2,CERT1,SPRY1,DLC1,YAP1,SEMA3C,TAB2,HEY2,PDLIM3,AHI1,ARMC4,WDR11,PARVA,ADIPOR2,BICC1,SCUBE1,LEMD2,FREM2,AKT1,SLC6A4,LATS2,WWC3,ACTA2,EPHA3,FN1,GCNT2,HGF,LOXL2,POFUT2,FBXL17…
5_Member	GO Biological Processes	GO:0007507	heart development	-11.72	-8.35196	56/589	163,653,657,659,1026,1363,1432,1906,1948,2294,2697,3091,3516,3643,4000,4015,4088,4772,5125,5156,5318,5681,5915,6443,6445,6546,6586,6659,6789,7046,7048,7049,8321,8470,8572,8828,8829,9510,9645,10087,10252,10395,10413,10512,23118,23493,27295,54806,55130,55717,55742,79602,80114,80274,221496,341640	AP2B1,BMP5,BMPR1A,BMPR2,CDKN1A,CPE,MAPK14,EDN1,EFNB2,FOXF1,GJA1,HIF1A,RBPJ,INSR,LMNA,LOX,SMAD3,NFATC1,PCSK5,PDGFRA,PKP2,PSKH1,RARB,SGCB,SGCG,SLC8A1,SLIT3,SOX4,STK4,TGFBR1,TGFBR2,TGFBR3,FZD1,SORBS2,PDLIM4,NRP2,NRP1,ADAMTS1,MICAL2,CERT1,SPRY1,DLC1,YAP1,SEMA3C,TAB2,HEY2,PDLIM3,AHI1,ARMC4,WDR11,PARVA,ADIPOR2,BICC1,SCUBE1,LEMD2,FREM2
5_Member	GO Biological Processes	GO:0003206	cardiac chamber morphogenesis	-8.63411	-5.91232	21/131	653,657,659,1363,2294,3091,3516,5318,5915,6586,6659,7046,7048,7049,8321,8828,8829,9510,10512,23493,55742	BMP5,BMPR1A,BMPR2,CPE,FOXF1,HIF1A,RBPJ,PKP2,RARB,SLIT3,SOX4,TGFBR1,TGFBR2,TGFBR3,FZD1,NRP2,NRP1,ADAMTS1,SEMA3C,HEY2,PARVA
5_Member	GO Biological Processes	GO:0003007	heart morphogenesis	-8.41605	-5.73457	30/261	653,657,659,1363,2294,3091,3516,3643,4088,5318,5915,6586,6659,7046,7048,7049,8321,8828,8829,9510,9645,10087,10252,10395,10413,10512,23493,54806,55742,221496	BMP5,BMPR1A,BMPR2,CPE,FOXF1,HIF1A,RBPJ,INSR,SMAD3,PKP2,RARB,SLIT3,SOX4,TGFBR1,TGFBR2,TGFBR3,FZD1,NRP2,NRP1,ADAMTS1,MICAL2,CERT1,SPRY1,DLC1,YAP1,SEMA3C,HEY2,AHI1,PARVA,LEMD2
5_Member	GO Biological Processes	GO:0060411	cardiac septum morphogenesis	-8.40364	-5.73457	16/77	653,657,659,3516,5915,6586,6659,7046,7048,7049,8321,8828,8829,10512,23493,55742	BMP5,BMPR1A,BMPR2,RBPJ,RARB,SLIT3,SOX4,TGFBR1,TGFBR2,TGFBR3,FZD1,NRP2,NRP1,SEMA3C,HEY2,PARVA
5_Member	GO Biological Processes	GO:0003205	cardiac chamber development	-7.78217	-5.22224	23/173	163,653,657,659,1363,2294,3091,3516,5125,5318,5915,6586,6659,7046,7048,7049,8321,8828,8829,9510,10512,23493,55742	AP2B1,BMP5,BMPR1A,BMPR2,CPE,FOXF1,HIF1A,RBPJ,PCSK5,PKP2,RARB,SLIT3,SOX4,TGFBR1,TGFBR2,TGFBR3,FZD1,NRP2,NRP1,ADAMTS1,SEMA3C,HEY2,PARVA
5_Member	GO Biological Processes	GO:0003279	cardiac septum development	-7.38815	-4.91536	18/114	163,653,657,659,3516,5125,5915,6586,6659,7046,7048,7049,8321,8828,8829,10512,23493,55742	AP2B1,BMP5,BMPR1A,BMPR2,RBPJ,PCSK5,RARB,SLIT3,SOX4,TGFBR1,TGFBR2,TGFBR3,FZD1,NRP2,NRP1,SEMA3C,HEY2,PARVA
5_Member	GO Biological Processes	GO:0003151	outflow tract morphogenesis	-5.59139	-3.47293	13/81	657,659,3091,3516,5915,7048,7049,8321,8828,8829,10512,23493,55742	BMPR1A,BMPR2,HIF1A,RBPJ,RARB,TGFBR2,TGFBR3,FZD1,NRP2,NRP1,SEMA3C,HEY2,PARVA
5_Member	GO Biological Processes	GO:0003208	cardiac ventricle morphogenesis	-5.25563	-3.21274	12/74	657,1363,2294,3091,3516,5318,6659,7046,7048,7049,10512,23493	BMPR1A,CPE,FOXF1,HIF1A,RBPJ,PKP2,SOX4,TGFBR1,TGFBR2,TGFBR3,SEMA3C,HEY2
5_Member	GO Biological Processes	GO:0046620	regulation of organ growth	-5.24034	-3.20329	15/114	207,657,1432,1906,2697,3516,6532,6789,7046,7048,7049,10413,23493,26524,55841	AKT1,BMPR1A,MAPK14,EDN1,GJA1,RBPJ,SLC6A4,STK4,TGFBR1,TGFBR2,TGFBR3,YAP1,HEY2,LATS2,WWC3
5_Member	GO Biological Processes	GO:0003186	tricuspid valve morphogenesis	-5.22906	-3.19489	4/5	657,659,7048,23493	BMPR1A,BMPR2,TGFBR2,HEY2
5_Member	GO Biological Processes	GO:0060485	mesenchyme development	-5.14003	-3.13101	25/278	59,653,657,659,1906,2042,2294,2335,2651,3082,3091,3516,4017,4088,7046,7048,7049,8828,8829,10252,10413,10512,23275,23493,64839	ACTA2,BMP5,BMPR1A,BMPR2,EDN1,EPHA3,FOXF1,FN1,GCNT2,HGF,HIF1A,RBPJ,LOXL2,SMAD3,TGFBR1,TGFBR2,TGFBR3,NRP2,NRP1,SPRY1,YAP1,SEMA3C,POFUT2,HEY2,FBXL17
5_Member	GO Biological Processes	GO:0003231	cardiac ventricle development	-5.12337	-3.13033	16/131	163,657,659,1363,2294,3091,3516,5318,6586,6659,7046,7048,7049,8321,10512,23493	AP2B1,BMPR1A,BMPR2,CPE,FOXF1,HIF1A,RBPJ,PKP2,SLIT3,SOX4,TGFBR1,TGFBR2,TGFBR3,FZD1,SEMA3C,HEY2
5_Member	GO Biological Processes	GO:0048762	mesenchymal cell differentiation	-4.86484	-2.94616	21/218	653,657,1906,2042,2335,2651,3082,3091,3516,4017,4088,7046,7048,7049,8828,8829,10252,10512,23275,23493,64839	BMP5,BMPR1A,EDN1,EPHA3,FN1,GCNT2,HGF,HIF1A,RBPJ,LOXL2,SMAD3,TGFBR1,TGFBR2,TGFBR3,NRP2,NRP1,SPRY1,SEMA3C,POFUT2,HEY2,FBXL17
5_Member	GO Biological Processes	GO:0060412	ventricular septum morphogenesis	-4.84337	-2.92908	9/45	659,3516,6586,6659,7046,7048,7049,8321,23493	BMPR2,RBPJ,SLIT3,SOX4,TGFBR1,TGFBR2,TGFBR3,FZD1,HEY2
5_Member	GO Biological Processes	GO:0003175	tricuspid valve development	-4.76358	-2.86988	4/6	657,659,7048,23493	BMPR1A,BMPR2,TGFBR2,HEY2
5_Member	GO Biological Processes	GO:0072132	mesenchyme morphogenesis	-4.11639	-2.37454	9/55	59,653,657,2294,3516,4088,7046,7048,23493	ACTA2,BMP5,BMPR1A,FOXF1,RBPJ,SMAD3,TGFBR1,TGFBR2,HEY2
5_Member	GO Biological Processes	GO:0003181	atrioventricular valve morphogenesis	-3.97185	-2.26958	6/24	657,659,6586,6659,7048,23493	BMPR1A,BMPR2,SLIT3,SOX4,TGFBR2,HEY2
5_Member	GO Biological Processes	GO:0061384	heart trabecula morphogenesis	-3.96951	-2.26958	7/34	653,657,3516,7046,7049,9510,23493	BMP5,BMPR1A,RBPJ,TGFBR1,TGFBR3,ADAMTS1,HEY2
5_Member	GO Biological Processes	GO:0060043	regulation of cardiac muscle cell proliferation	-3.93101	-2.24031	9/58	657,1432,2697,3516,7046,7048,7049,10413,23493	BMPR1A,MAPK14,GJA1,RBPJ,TGFBR1,TGFBR2,TGFBR3,YAP1,HEY2
5_Member	GO Biological Processes	GO:0060840	artery development	-3.87586	-2.19547	12/101	163,657,659,1948,2294,3516,4015,4638,6659,7046,8829,23493	AP2B1,BMPR1A,BMPR2,EFNB2,FOXF1,RBPJ,LOX,MYLK,SOX4,TGFBR1,NRP1,HEY2
5_Member	GO Biological Processes	GO:0003197	endocardial cushion development	-3.84309	-2.17152	8/47	653,657,659,2294,3516,7046,7048,23493	BMP5,BMPR1A,BMPR2,FOXF1,RBPJ,TGFBR1,TGFBR2,HEY2
5_Member	GO Biological Processes	GO:0035265	organ growth	-3.76992	-2.11526	18/204	207,657,1432,1906,2697,3516,5660,5915,6532,6789,7046,7048,7049,8470,10413,23493,26524,55841	AKT1,BMPR1A,MAPK14,EDN1,GJA1,RBPJ,PSAP,RARB,SLC6A4,STK4,TGFBR1,TGFBR2,TGFBR3,SORBS2,YAP1,HEY2,LATS2,WWC3
5_Member	GO Biological Processes	GO:0003171	atrioventricular valve development	-3.76337	-2.11252	6/26	657,659,6586,6659,7048,23493	BMPR1A,BMPR2,SLIT3,SOX4,TGFBR2,HEY2
5_Member	GO Biological Processes	GO:0048844	artery morphogenesis	-3.73699	-2.09095	10/75	657,659,1948,2294,3516,4638,6659,7046,8829,23493	BMPR1A,BMPR2,EFNB2,FOXF1,RBPJ,MYLK,SOX4,TGFBR1,NRP1,HEY2
5_Member	GO Biological Processes	GO:0061383	trabecula morphogenesis	-3.7119	-2.0751	8/49	653,657,3516,4313,7046,7049,9510,23493	BMP5,BMPR1A,RBPJ,MMP2,TGFBR1,TGFBR3,ADAMTS1,HEY2
5_Member	GO Biological Processes	GO:0003281	ventricular septum development	-3.68866	-2.05683	10/76	163,659,3516,6586,6659,7046,7048,7049,8321,23493	AP2B1,BMPR2,RBPJ,SLIT3,SOX4,TGFBR1,TGFBR2,TGFBR3,FZD1,HEY2
5_Member	GO Biological Processes	GO:0003272	endocardial cushion formation	-3.66653	-2.03998	6/27	653,657,3516,7046,7048,23493	BMP5,BMPR1A,RBPJ,TGFBR1,TGFBR2,HEY2
5_Member	GO Biological Processes	GO:0055021	regulation of cardiac muscle tissue growth	-3.54868	-1.95258	10/79	657,1432,1906,2697,3516,7046,7048,7049,10413,23493	BMPR1A,MAPK14,EDN1,GJA1,RBPJ,TGFBR1,TGFBR2,TGFBR3,YAP1,HEY2
5_Member	GO Biological Processes	GO:0001837	epithelial to mesenchymal transition	-3.54801	-1.95258	14/142	653,2042,2651,3082,3091,3516,4017,4088,7046,7048,7049,10252,23275,23493	BMP5,EPHA3,GCNT2,HGF,HIF1A,RBPJ,LOXL2,SMAD3,TGFBR1,TGFBR2,TGFBR3,SPRY1,POFUT2,HEY2
5_Member	GO Biological Processes	GO:0035905	ascending aorta development	-3.45834	-1.88766	3/5	4015,6659,23493	LOX,SOX4,HEY2
5_Member	GO Biological Processes	GO:0014855	striated muscle cell proliferation	-3.41573	-1.85289	10/82	657,1432,2697,3516,3717,7046,7048,7049,10413,23493	BMPR1A,MAPK14,GJA1,RBPJ,JAK2,TGFBR1,TGFBR2,TGFBR3,YAP1,HEY2
5_Member	GO Biological Processes	GO:0060038	cardiac muscle cell proliferation	-3.3939	-1.83589	9/68	657,1432,2697,3516,7046,7048,7049,10413,23493	BMPR1A,MAPK14,GJA1,RBPJ,TGFBR1,TGFBR2,TGFBR3,YAP1,HEY2
5_Member	GO Biological Processes	GO:0060420	regulation of heart growth	-3.28929	-1.74639	10/85	657,1432,1906,2697,3516,7046,7048,7049,10413,23493	BMPR1A,MAPK14,EDN1,GJA1,RBPJ,TGFBR1,TGFBR2,TGFBR3,YAP1,HEY2
5_Member	GO Biological Processes	GO:0055024	regulation of cardiac muscle tissue development	-3.27104	-1.73823	11/101	657,1432,1906,1948,2697,3516,7046,7048,7049,10413,23493	BMPR1A,MAPK14,EDN1,EFNB2,GJA1,RBPJ,TGFBR1,TGFBR2,TGFBR3,YAP1,HEY2
5_Member	GO Biological Processes	GO:0016202	regulation of striated muscle tissue development	-3.24667	-1.72175	14/152	657,1432,1906,1948,2697,3516,4015,4088,4654,7046,7048,7049,10413,23493	BMPR1A,MAPK14,EDN1,EFNB2,GJA1,RBPJ,LOX,SMAD3,MYOD1,TGFBR1,TGFBR2,TGFBR3,YAP1,HEY2
5_Member	GO Biological Processes	GO:0003150	muscular septum morphogenesis	-3.1682	-1.6693	3/6	7049,8321,23493	TGFBR3,FZD1,HEY2
5_Member	GO Biological Processes	GO:1901861	regulation of muscle tissue development	-3.16202	-1.66571	14/155	657,1432,1906,1948,2697,3516,4015,4088,4654,7046,7048,7049,10413,23493	BMPR1A,MAPK14,EDN1,EFNB2,GJA1,RBPJ,LOX,SMAD3,MYOD1,TGFBR1,TGFBR2,TGFBR3,YAP1,HEY2
5_Member	GO Biological Processes	GO:0048634	regulation of muscle organ development	-3.13436	-1.64054	14/156	657,1432,1906,1948,2697,3516,4015,4088,4654,7046,7048,7049,10413,23493	BMPR1A,MAPK14,EDN1,EFNB2,GJA1,RBPJ,LOX,SMAD3,MYOD1,TGFBR1,TGFBR2,TGFBR3,YAP1,HEY2
5_Member	GO Biological Processes	GO:0035904	aorta development	-3.09739	-1.61016	8/60	163,657,1948,3516,4015,4638,6659,23493	AP2B1,BMPR1A,EFNB2,RBPJ,LOX,MYLK,SOX4,HEY2
5_Member	GO Biological Processes	GO:0055017	cardiac muscle tissue growth	-3.09313	-1.60959	11/106	657,1432,1906,2697,3516,7046,7048,7049,8470,10413,23493	BMPR1A,MAPK14,EDN1,GJA1,RBPJ,TGFBR1,TGFBR2,TGFBR3,SORBS2,YAP1,HEY2
5_Member	GO Biological Processes	GO:0003170	heart valve development	-3.04897	-1.57934	8/61	657,659,3516,4772,6586,6659,7048,23493	BMPR1A,BMPR2,RBPJ,NFATC1,SLIT3,SOX4,TGFBR2,HEY2
5_Member	GO Biological Processes	GO:0035909	aorta morphogenesis	-3.02566	-1.56303	6/35	657,1948,3516,4638,6659,23493	BMPR1A,EFNB2,RBPJ,MYLK,SOX4,HEY2
5_Member	GO Biological Processes	GO:0055023	positive regulation of cardiac muscle tissue growth	-3.00827	-1.55236	7/48	657,1432,1906,3516,7049,10413,23493	BMPR1A,MAPK14,EDN1,RBPJ,TGFBR3,YAP1,HEY2
5_Member	GO Biological Processes	GO:0055025	positive regulation of cardiac muscle tissue development	-3.0016	-1.54661	8/62	657,1432,1906,1948,3516,7049,10413,23493	BMPR1A,MAPK14,EDN1,EFNB2,RBPJ,TGFBR3,YAP1,HEY2
5_Member	GO Biological Processes	GO:0060317	cardiac epithelial to mesenchymal transition	-2.95872	-1.52094	6/36	3516,7046,7048,7049,10252,23493	RBPJ,TGFBR1,TGFBR2,TGFBR3,SPRY1,HEY2
5_Member	GO Biological Processes	GO:0046622	positive regulation of organ growth	-2.95524	-1.52094	8/63	207,657,1432,1906,3516,7049,10413,23493	AKT1,BMPR1A,MAPK14,EDN1,RBPJ,TGFBR3,YAP1,HEY2
5_Member	GO Biological Processes	GO:0060415	muscle tissue morphogenesis	-2.87453	-1.46572	9/80	657,3516,4638,5081,5318,7046,7049,8321,23493	BMPR1A,RBPJ,MYLK,PAX7,PKP2,TGFBR1,TGFBR3,FZD1,HEY2
5_Member	GO Biological Processes	GO:0060419	heart growth	-2.86339	-1.4598	11/113	657,1432,1906,2697,3516,7046,7048,7049,8470,10413,23493	BMPR1A,MAPK14,EDN1,GJA1,RBPJ,TGFBR1,TGFBR2,TGFBR3,SORBS2,YAP1,HEY2
5_Member	GO Biological Processes	GO:0003203	endocardial cushion morphogenesis	-2.83169	-1.43545	6/38	653,657,3516,7046,7048,23493	BMP5,BMPR1A,RBPJ,TGFBR1,TGFBR2,HEY2
5_Member	GO Biological Processes	GO:0060045	positive regulation of cardiac muscle cell proliferation	-2.83169	-1.43545	6/38	657,1432,3516,7049,10413,23493	BMPR1A,MAPK14,RBPJ,TGFBR3,YAP1,HEY2
5_Member	GO Biological Processes	GO:0003179	heart valve morphogenesis	-2.79868	-1.40934	7/52	657,659,4772,6586,6659,7048,23493	BMPR1A,BMPR2,NFATC1,SLIT3,SOX4,TGFBR2,HEY2
5_Member	GO Biological Processes	GO:0060421	positive regulation of heart growth	-2.79868	-1.40934	7/52	657,1432,1906,3516,7049,10413,23493	BMPR1A,MAPK14,EDN1,RBPJ,TGFBR3,YAP1,HEY2
5_Member	GO Biological Processes	GO:0003222	ventricular trabecula myocardium morphogenesis	-2.79523	-1.40822	4/16	657,3516,7046,23493	BMPR1A,RBPJ,TGFBR1,HEY2
5_Member	GO Biological Processes	GO:0003223	ventricular compact myocardium morphogenesis	-2.74276	-1.37222	3/8	657,7046,7049	BMPR1A,TGFBR1,TGFBR3
5_Member	GO Biological Processes	GO:0035912	dorsal aorta morphogenesis	-2.74276	-1.37222	3/8	657,3516,23493	BMPR1A,RBPJ,HEY2
5_Member	GO Biological Processes	GO:0045844	positive regulation of striated muscle tissue development	-2.68886	-1.33485	9/85	657,1432,1906,1948,3516,4654,7049,10413,23493	BMPR1A,MAPK14,EDN1,EFNB2,RBPJ,MYOD1,TGFBR3,YAP1,HEY2
5_Member	GO Biological Processes	GO:0048636	positive regulation of muscle organ development	-2.68886	-1.33485	9/85	657,1432,1906,1948,3516,4654,7049,10413,23493	BMPR1A,MAPK14,EDN1,EFNB2,RBPJ,MYOD1,TGFBR3,YAP1,HEY2
5_Member	GO Biological Processes	GO:1901863	positive regulation of muscle tissue development	-2.65356	-1.31024	9/86	657,1432,1906,1948,3516,4654,7049,10413,23493	BMPR1A,MAPK14,EDN1,EFNB2,RBPJ,MYOD1,TGFBR3,YAP1,HEY2
5_Member	GO Biological Processes	GO:0048644	muscle organ morphogenesis	-2.61885	-1.28018	9/87	657,3516,4638,5081,5318,7046,7049,8321,23493	BMPR1A,RBPJ,MYLK,PAX7,PKP2,TGFBR1,TGFBR3,FZD1,HEY2
5_Member	GO Biological Processes	GO:0060977	coronary vasculature morphogenesis	-2.59254	-1.26021	4/18	7046,7049,8829,23493	TGFBR1,TGFBR3,NRP1,HEY2
5_Member	GO Biological Processes	GO:0003183	mitral valve morphogenesis	-2.43341	-1.13762	3/10	657,659,6659	BMPR1A,BMPR2,SOX4
5_Member	GO Biological Processes	GO:0035907	dorsal aorta development	-2.43341	-1.13762	3/10	657,3516,23493	BMPR1A,RBPJ,HEY2
5_Member	GO Biological Processes	GO:0003176	aortic valve development	-2.41667	-1.12389	5/32	659,3516,4772,6586,23493	BMPR2,RBPJ,NFATC1,SLIT3,HEY2
5_Member	GO Biological Processes	GO:0003198	epithelial to mesenchymal transition involved in endocardial cushion formation	-2.41587	-1.12389	4/20	3516,7046,7048,23493	RBPJ,TGFBR1,TGFBR2,HEY2
5_Member	GO Biological Processes	GO:0003177	pulmonary valve development	-2.33553	-1.06191	4/21	659,3516,4772,23493	BMPR2,RBPJ,NFATC1,HEY2
5_Member	GO Biological Processes	GO:0003215	cardiac right ventricle morphogenesis	-2.33553	-1.06191	4/21	657,6659,10512,23493	BMPR1A,SOX4,SEMA3C,HEY2
5_Member	GO Biological Processes	GO:0003174	mitral valve development	-2.3059	-1.04949	3/11	657,659,6659	BMPR1A,BMPR2,SOX4
5_Member	GO Biological Processes	GO:0060837	blood vessel endothelial cell differentiation	-2.3059	-1.04949	3/11	3516,8829,23493	RBPJ,NRP1,HEY2
5_Member	GO Biological Processes	GO:0055010	ventricular cardiac muscle tissue morphogenesis	-2.30551	-1.04949	6/48	657,3516,5318,7046,7049,23493	BMPR1A,RBPJ,PKP2,TGFBR1,TGFBR3,HEY2
5_Member	GO Biological Processes	GO:0060976	coronary vasculature development	-2.17524	-0.951099	6/51	163,5125,7046,7049,8829,23493	AP2B1,PCSK5,TGFBR1,TGFBR3,NRP1,HEY2
5_Member	GO Biological Processes	GO:1905314	semi-lunar valve development	-2.14043	-0.920717	5/37	659,3516,4772,6586,23493	BMPR2,RBPJ,NFATC1,SLIT3,HEY2
5_Member	GO Biological Processes	GO:0003229	ventricular cardiac muscle tissue development	-2.01681	-0.829383	6/55	657,3516,5318,7046,7049,23493	BMPR1A,RBPJ,PKP2,TGFBR1,TGFBR3,HEY2
6_Summary	GO Biological Processes	GO:0070848	response to growth factor	-11.1192	-7.82383	63/736	25,92,207,538,627,653,657,659,857,960,1398,1432,1634,1783,1906,1958,1960,2241,2353,2651,2734,2885,3082,3091,3164,3516,3643,4015,4060,4088,4756,5139,5156,5962,6497,6715,7046,7048,7049,7525,8036,8321,8516,8826,8828,8829,8895,9372,10252,10631,30844,50515,54829,55614,57154,79176,79801,90993,94031,135228,151449,221496,285704,3717,4012,84913	ABL1,ACVR2A,AKT1,ATP7A,BDNF,BMP5,BMPR1A,BMPR2,CAV1,CD44,CRK,MAPK14,DCN,DYNC1LI2,EDN1,EGR1,EGR3,FER,FOS,GCNT2,GLG1,GRB2,HGF,HIF1A,NR4A1,RBPJ,INSR,LOX,LUM,SMAD3,NEO1,PDE3A,PDGFRA,RDX,SKI,SRD5A1,TGFBR1,TGFBR2,TGFBR3,YES1,SHOC2,FZD1,ITGA8,IQGAP1,NRP2,NRP1,CPNE3,ZFYVE9,SPRY1,POSTN,EHD4,CHST11,ASPN,KIF16B,SMURF1,FBXL15,SHCBP1,CREB3L1,HTRA3,CD109,GDF7,LEMD2,RGMB,JAK2,LNPEP,ATOH8
6_Member	GO Biological Processes	GO:0070848	response to growth factor	-11.1192	-7.82383	63/736	25,92,207,538,627,653,657,659,857,960,1398,1432,1634,1783,1906,1958,1960,2241,2353,2651,2734,2885,3082,3091,3164,3516,3643,4015,4060,4088,4756,5139,5156,5962,6497,6715,7046,7048,7049,7525,8036,8321,8516,8826,8828,8829,8895,9372,10252,10631,30844,50515,54829,55614,57154,79176,79801,90993,94031,135228,151449,221496,285704	ABL1,ACVR2A,AKT1,ATP7A,BDNF,BMP5,BMPR1A,BMPR2,CAV1,CD44,CRK,MAPK14,DCN,DYNC1LI2,EDN1,EGR1,EGR3,FER,FOS,GCNT2,GLG1,GRB2,HGF,HIF1A,NR4A1,RBPJ,INSR,LOX,LUM,SMAD3,NEO1,PDE3A,PDGFRA,RDX,SKI,SRD5A1,TGFBR1,TGFBR2,TGFBR3,YES1,SHOC2,FZD1,ITGA8,IQGAP1,NRP2,NRP1,CPNE3,ZFYVE9,SPRY1,POSTN,EHD4,CHST11,ASPN,KIF16B,SMURF1,FBXL15,SHCBP1,CREB3L1,HTRA3,CD109,GDF7,LEMD2,RGMB
6_Member	GO Biological Processes	GO:0071363	cellular response to growth factor stimulus	-10.9485	-7.7354	61/706	25,92,207,538,627,653,657,659,857,960,1398,1432,1634,1783,1906,1958,1960,2353,2651,2734,2885,3082,3091,3164,3516,3643,4015,4088,4756,5139,5156,5962,6497,6715,7046,7048,7049,7525,8036,8321,8516,8826,8828,8829,8895,9372,10252,10631,30844,50515,54829,55614,57154,79176,79801,90993,94031,135228,151449,221496,285704	ABL1,ACVR2A,AKT1,ATP7A,BDNF,BMP5,BMPR1A,BMPR2,CAV1,CD44,CRK,MAPK14,DCN,DYNC1LI2,EDN1,EGR1,EGR3,FOS,GCNT2,GLG1,GRB2,HGF,HIF1A,NR4A1,RBPJ,INSR,LOX,SMAD3,NEO1,PDE3A,PDGFRA,RDX,SKI,SRD5A1,TGFBR1,TGFBR2,TGFBR3,YES1,SHOC2,FZD1,ITGA8,IQGAP1,NRP2,NRP1,CPNE3,ZFYVE9,SPRY1,POSTN,EHD4,CHST11,ASPN,KIF16B,SMURF1,FBXL15,SHCBP1,CREB3L1,HTRA3,CD109,GDF7,LEMD2,RGMB
6_Member	GO Biological Processes	GO:0007178	transmembrane receptor protein serine/threonine kinase signaling pathway	-7.39176	-4.91536	34/356	25,92,653,657,659,857,1432,1958,2353,2651,2734,3516,3717,4012,4015,4088,4756,6497,7046,7048,7049,8321,8516,9372,50515,54829,57154,79176,84913,94031,135228,151449,221496,285704	ABL1,ACVR2A,BMP5,BMPR1A,BMPR2,CAV1,MAPK14,EGR1,FOS,GCNT2,GLG1,RBPJ,JAK2,LNPEP,LOX,SMAD3,NEO1,SKI,TGFBR1,TGFBR2,TGFBR3,FZD1,ITGA8,ZFYVE9,CHST11,ASPN,SMURF1,FBXL15,ATOH8,HTRA3,CD109,GDF7,LEMD2,RGMB
6_Member	GO Biological Processes	GO:0090092	regulation of transmembrane receptor protein serine/threonine kinase signaling pathway	-6.61381	-4.24577	26/247	25,92,653,657,659,857,2734,3516,3717,4015,4088,4756,6497,7046,7048,7049,8321,8516,50515,54829,57154,79176,94031,135228,151449,221496	ABL1,ACVR2A,BMP5,BMPR1A,BMPR2,CAV1,GLG1,RBPJ,JAK2,LOX,SMAD3,NEO1,SKI,TGFBR1,TGFBR2,TGFBR3,FZD1,ITGA8,CHST11,ASPN,SMURF1,FBXL15,HTRA3,CD109,GDF7,LEMD2
6_Member	GO Biological Processes	GO:0071560	cellular response to transforming growth factor beta stimulus	-5.02471	-3.04456	23/247	657,857,1398,1906,2353,2651,2734,4015,4088,5139,6497,7046,7048,7049,7525,8516,9372,10631,50515,54829,57154,94031,135228	BMPR1A,CAV1,CRK,EDN1,FOS,GCNT2,GLG1,LOX,SMAD3,PDE3A,SKI,TGFBR1,TGFBR2,TGFBR3,YES1,ITGA8,ZFYVE9,POSTN,CHST11,ASPN,SMURF1,HTRA3,CD109
6_Member	GO Biological Processes	GO:0030512	negative regulation of transforming growth factor beta receptor signaling pathway	-4.89613	-2.96628	12/80	857,2734,4088,6497,7046,7048,7049,50515,54829,57154,94031,135228	CAV1,GLG1,SMAD3,SKI,TGFBR1,TGFBR2,TGFBR3,CHST11,ASPN,SMURF1,HTRA3,CD109
6_Member	GO Biological Processes	GO:0090288	negative regulation of cellular response to growth factor stimulus	-4.87939	-2.95628	18/168	25,857,1634,2734,4088,6497,7046,7048,7049,8321,10252,50515,54829,57154,90993,94031,135228,221496	ABL1,CAV1,DCN,GLG1,SMAD3,SKI,TGFBR1,TGFBR2,TGFBR3,FZD1,SPRY1,CHST11,ASPN,SMURF1,CREB3L1,HTRA3,CD109,LEMD2
6_Member	GO Biological Processes	GO:0071559	response to transforming growth factor beta	-4.85504	-2.93856	23/253	657,857,1398,1906,2353,2651,2734,4015,4088,5139,6497,7046,7048,7049,7525,8516,9372,10631,50515,54829,57154,94031,135228	BMPR1A,CAV1,CRK,EDN1,FOS,GCNT2,GLG1,LOX,SMAD3,PDE3A,SKI,TGFBR1,TGFBR2,TGFBR3,YES1,ITGA8,ZFYVE9,POSTN,CHST11,ASPN,SMURF1,HTRA3,CD109
6_Member	GO Biological Processes	GO:1903845	negative regulation of cellular response to transforming growth factor beta stimulus	-4.78413	-2.88061	12/82	857,2734,4088,6497,7046,7048,7049,50515,54829,57154,94031,135228	CAV1,GLG1,SMAD3,SKI,TGFBR1,TGFBR2,TGFBR3,CHST11,ASPN,SMURF1,HTRA3,CD109
6_Member	GO Biological Processes	GO:0090101	negative regulation of transmembrane receptor protein serine/threonine kinase signaling pathway	-4.70695	-2.83378	15/126	25,857,2734,4088,6497,7046,7048,7049,8321,50515,54829,57154,94031,135228,221496	ABL1,CAV1,GLG1,SMAD3,SKI,TGFBR1,TGFBR2,TGFBR3,FZD1,CHST11,ASPN,SMURF1,HTRA3,CD109,LEMD2
6_Member	GO Biological Processes	GO:0030509	BMP signaling pathway	-4.70253	-2.83378	17/157	25,92,653,657,659,1958,3516,4756,6497,7049,8321,57154,79176,94031,151449,221496,285704	ABL1,ACVR2A,BMP5,BMPR1A,BMPR2,EGR1,RBPJ,NEO1,SKI,TGFBR3,FZD1,SMURF1,FBXL15,HTRA3,GDF7,LEMD2,RGMB
6_Member	GO Biological Processes	GO:0090287	regulation of cellular response to growth factor stimulus	-4.67304	-2.814	25/296	25,659,857,1634,2734,3091,3516,4015,4088,4756,6497,7046,7048,7049,8321,8516,10252,50515,54829,57154,79176,90993,94031,135228,221496	ABL1,BMPR2,CAV1,DCN,GLG1,HIF1A,RBPJ,LOX,SMAD3,NEO1,SKI,TGFBR1,TGFBR2,TGFBR3,FZD1,ITGA8,SPRY1,CHST11,ASPN,SMURF1,FBXL15,CREB3L1,HTRA3,CD109,LEMD2
6_Member	GO Biological Processes	GO:0017015	regulation of transforming growth factor beta receptor signaling pathway	-4.33516	-2.54853	14/120	857,2734,4015,4088,6497,7046,7048,7049,8516,50515,54829,57154,94031,135228	CAV1,GLG1,LOX,SMAD3,SKI,TGFBR1,TGFBR2,TGFBR3,ITGA8,CHST11,ASPN,SMURF1,HTRA3,CD109
6_Member	GO Biological Processes	GO:0071772	response to BMP	-4.25842	-2.48619	17/170	25,92,653,657,659,1958,3516,4756,6497,7049,8321,57154,79176,94031,151449,221496,285704	ABL1,ACVR2A,BMP5,BMPR1A,BMPR2,EGR1,RBPJ,NEO1,SKI,TGFBR3,FZD1,SMURF1,FBXL15,HTRA3,GDF7,LEMD2,RGMB
6_Member	GO Biological Processes	GO:0071773	cellular response to BMP stimulus	-4.25842	-2.48619	17/170	25,92,653,657,659,1958,3516,4756,6497,7049,8321,57154,79176,94031,151449,221496,285704	ABL1,ACVR2A,BMP5,BMPR1A,BMPR2,EGR1,RBPJ,NEO1,SKI,TGFBR3,FZD1,SMURF1,FBXL15,HTRA3,GDF7,LEMD2,RGMB
6_Member	GO Biological Processes	GO:1903844	regulation of cellular response to transforming growth factor beta stimulus	-4.25535	-2.48468	14/122	857,2734,4015,4088,6497,7046,7048,7049,8516,50515,54829,57154,94031,135228	CAV1,GLG1,LOX,SMAD3,SKI,TGFBR1,TGFBR2,TGFBR3,ITGA8,CHST11,ASPN,SMURF1,HTRA3,CD109
6_Member	GO Biological Processes	GO:0007179	transforming growth factor beta receptor signaling pathway	-3.96144	-2.26417	18/197	657,857,2353,2651,2734,4015,4088,6497,7046,7048,7049,8516,9372,50515,54829,57154,94031,135228	BMPR1A,CAV1,FOS,GCNT2,GLG1,LOX,SMAD3,SKI,TGFBR1,TGFBR2,TGFBR3,ITGA8,ZFYVE9,CHST11,ASPN,SMURF1,HTRA3,CD109
6_Member	GO Biological Processes	GO:0030510	regulation of BMP signaling pathway	-3.01693	-1.55866	10/92	25,659,3516,4756,6497,8321,57154,79176,94031,221496	ABL1,BMPR2,RBPJ,NEO1,SKI,FZD1,SMURF1,FBXL15,HTRA3,LEMD2
6_Member	GO Biological Processes	GO:0030514	negative regulation of BMP signaling pathway	-2.13409	-0.917016	6/52	25,6497,8321,57154,94031,221496	ABL1,SKI,FZD1,SMURF1,HTRA3,LEMD2
7_Summary	GO Biological Processes	GO:0030036	actin cytoskeleton organization	-10.8387	-7.71862	60/692	25,27,118,120,388,613,683,1398,1466,1730,1906,2042,2241,2317,2764,2885,3717,4088,4627,4646,5156,5341,5592,5962,6385,7016,7046,7082,7456,8470,8500,8572,8829,9578,9645,9873,10152,10395,10580,10787,22843,23384,23433,27295,29766,29780,54857,55704,55742,57381,57551,57580,57591,81624,83700,84168,133746,154810,203447,342184,857,2697,3784,5318,23171,538,4015,4017,4060,7837,9509,9748,57606,79875,401720,60…	ABL1,ABL2,ADD1,ADD3,RHOB,BCR,BST1,CRK,CSRP2,DIAPH2,EDN1,EPHA3,FER,FLNB,GMFB,GRB2,JAK2,SMAD3,MYH9,MYO6,PDGFRA,PLEK,PRKG1,RDX,SDC4,TESK1,TGFBR1,TJP1,WIPF1,SORBS2,PPFIA1,PDLIM4,NRP1,CDC42BPB,MICAL2,FCHSD2,ABI2,DLC1,SORBS1,NCKAP1,PPM1E,SPECC1L,RHOQ,PDLIM3,TMOD3,PARVB,GDPD2,CCDC88A,PARVA,RHOJ,TAOK1,PREX1,MRTFA,DIAPH3,JAM3,ANTXR1,JMY,AMOTL1,NRK,FMN1,CAV1,GJA1,KCNQ1,PKP2,GPD1L,ATP7A,LOX,LOXL2,LUM,PXDN,A…
7_Member	GO Biological Processes	GO:0030036	actin cytoskeleton organization	-10.8387	-7.71862	60/692	25,27,118,120,388,613,683,1398,1466,1730,1906,2042,2241,2317,2764,2885,3717,4088,4627,4646,5156,5341,5592,5962,6385,7016,7046,7082,7456,8470,8500,8572,8829,9578,9645,9873,10152,10395,10580,10787,22843,23384,23433,27295,29766,29780,54857,55704,55742,57381,57551,57580,57591,81624,83700,84168,133746,154810,203447,342184	ABL1,ABL2,ADD1,ADD3,RHOB,BCR,BST1,CRK,CSRP2,DIAPH2,EDN1,EPHA3,FER,FLNB,GMFB,GRB2,JAK2,SMAD3,MYH9,MYO6,PDGFRA,PLEK,PRKG1,RDX,SDC4,TESK1,TGFBR1,TJP1,WIPF1,SORBS2,PPFIA1,PDLIM4,NRP1,CDC42BPB,MICAL2,FCHSD2,ABI2,DLC1,SORBS1,NCKAP1,PPM1E,SPECC1L,RHOQ,PDLIM3,TMOD3,PARVB,GDPD2,CCDC88A,PARVA,RHOJ,TAOK1,PREX1,MRTFA,DIAPH3,JAM3,ANTXR1,JMY,AMOTL1,NRK,FMN1
7_Member	GO Biological Processes	GO:0030029	actin filament-based process	-10.8294	-7.71862	65/785	25,27,118,120,388,613,683,857,1398,1466,1730,1906,2042,2241,2317,2697,2764,2885,3717,3784,4088,4627,4646,5156,5318,5341,5592,5962,6385,7016,7046,7082,7456,8470,8500,8572,8829,9578,9645,9873,10152,10395,10580,10787,22843,23171,23384,23433,27295,29766,29780,54857,55704,55742,57381,57551,57580,57591,81624,83700,84168,133746,154810,203447,342184	ABL1,ABL2,ADD1,ADD3,RHOB,BCR,BST1,CAV1,CRK,CSRP2,DIAPH2,EDN1,EPHA3,FER,FLNB,GJA1,GMFB,GRB2,JAK2,KCNQ1,SMAD3,MYH9,MYO6,PDGFRA,PKP2,PLEK,PRKG1,RDX,SDC4,TESK1,TGFBR1,TJP1,WIPF1,SORBS2,PPFIA1,PDLIM4,NRP1,CDC42BPB,MICAL2,FCHSD2,ABI2,DLC1,SORBS1,NCKAP1,PPM1E,GPD1L,SPECC1L,RHOQ,PDLIM3,TMOD3,PARVB,GDPD2,CCDC88A,PARVA,RHOJ,TAOK1,PREX1,MRTFA,DIAPH3,JAM3,ANTXR1,JMY,AMOTL1,NRK,FMN1
7_Member	GO Biological Processes	GO:0032970	regulation of actin filament-based process	-9.04144	-6.24327	40/404	25,27,118,120,388,683,857,1398,1906,2042,2241,2764,2885,4088,4627,5156,5318,5341,5962,6385,7016,7046,7082,7456,8500,8829,9873,10152,10395,10787,22843,23433,29766,55704,57381,57551,57580,83700,133746,342184	ABL1,ABL2,ADD1,ADD3,RHOB,BST1,CAV1,CRK,EDN1,EPHA3,FER,GMFB,GRB2,SMAD3,MYH9,PDGFRA,PKP2,PLEK,RDX,SDC4,TESK1,TGFBR1,TJP1,WIPF1,PPFIA1,NRP1,FCHSD2,ABI2,DLC1,NCKAP1,PPM1E,RHOQ,TMOD3,CCDC88A,RHOJ,TAOK1,PREX1,JAM3,JMY,FMN1
7_Member	GO Biological Processes	GO:0032956	regulation of actin cytoskeleton organization	-8.8869	-6.13615	37/359	25,27,118,120,388,683,1398,1906,2042,2241,2764,2885,4088,5156,5341,5962,6385,7016,7046,7082,7456,8500,8829,9873,10152,10395,10787,22843,23433,29766,55704,57381,57551,57580,83700,133746,342184	ABL1,ABL2,ADD1,ADD3,RHOB,BST1,CRK,EDN1,EPHA3,FER,GMFB,GRB2,SMAD3,PDGFRA,PLEK,RDX,SDC4,TESK1,TGFBR1,TJP1,WIPF1,PPFIA1,NRP1,FCHSD2,ABI2,DLC1,NCKAP1,PPM1E,RHOQ,TMOD3,CCDC88A,RHOJ,TAOK1,PREX1,JAM3,JMY,FMN1
7_Member	GO Biological Processes	GO:0007015	actin filament organization	-7.3921	-4.91536	38/426	25,118,120,388,1730,2241,2764,2885,3717,4088,4646,5341,5962,6385,7016,7046,7082,7456,8470,8500,8829,9645,9873,10152,10395,10580,10787,22843,23433,27295,29766,54857,55704,57381,57580,81624,133746,342184	ABL1,ADD1,ADD3,RHOB,DIAPH2,FER,GMFB,GRB2,JAK2,SMAD3,MYO6,PLEK,RDX,SDC4,TESK1,TGFBR1,TJP1,WIPF1,SORBS2,PPFIA1,NRP1,MICAL2,FCHSD2,ABI2,DLC1,SORBS1,NCKAP1,PPM1E,RHOQ,PDLIM3,TMOD3,GDPD2,CCDC88A,RHOJ,PREX1,DIAPH3,JMY,FMN1
7_Member	GO Biological Processes	GO:0097435	supramolecular fiber organization	-7.23459	-4.77732	52/698	25,118,120,388,538,1730,1906,2241,2764,2885,3717,4015,4017,4060,4088,4646,5156,5318,5341,5962,6385,7016,7046,7082,7456,7837,8470,8500,8829,9509,9645,9748,9873,10152,10395,10580,10787,22843,23433,27295,29766,54857,55704,57381,57551,57580,57606,79875,81624,133746,342184,401720	ABL1,ADD1,ADD3,RHOB,ATP7A,DIAPH2,EDN1,FER,GMFB,GRB2,JAK2,LOX,LOXL2,LUM,SMAD3,MYO6,PDGFRA,PKP2,PLEK,RDX,SDC4,TESK1,TGFBR1,TJP1,WIPF1,PXDN,SORBS2,PPFIA1,NRP1,ADAMTS2,MICAL2,SLK,FCHSD2,ABI2,DLC1,SORBS1,NCKAP1,PPM1E,RHOQ,PDLIM3,TMOD3,GDPD2,CCDC88A,RHOJ,TAOK1,PREX1,SLAIN2,THSD4,DIAPH3,JMY,FMN1,FIGNL2
7_Member	GO Biological Processes	GO:0110053	regulation of actin filament organization	-5.69097	-3.54228	26/276	25,118,120,2241,2764,2885,4088,5341,5962,6385,7016,7046,7082,7456,8500,8829,9873,10152,10395,10787,22843,29766,55704,57580,133746,342184	ABL1,ADD1,ADD3,FER,GMFB,GRB2,SMAD3,PLEK,RDX,SDC4,TESK1,TGFBR1,TJP1,WIPF1,PPFIA1,NRP1,FCHSD2,ABI2,DLC1,NCKAP1,PPM1E,TMOD3,CCDC88A,PREX1,JMY,FMN1
7_Member	GO Biological Processes	GO:0051493	regulation of cytoskeleton organization	-4.97741	-3.01224	39/555	25,27,118,120,388,683,1398,1906,2042,2241,2764,2885,4088,5156,5341,5962,6385,7016,7046,7082,7456,8500,8829,9873,10152,10395,10787,22843,23433,29766,55704,57381,57551,57580,57606,60312,83700,133746,342184	ABL1,ABL2,ADD1,ADD3,RHOB,BST1,CRK,EDN1,EPHA3,FER,GMFB,GRB2,SMAD3,PDGFRA,PLEK,RDX,SDC4,TESK1,TGFBR1,TJP1,WIPF1,PPFIA1,NRP1,FCHSD2,ABI2,DLC1,NCKAP1,PPM1E,RHOQ,TMOD3,CCDC88A,RHOJ,TAOK1,PREX1,SLAIN2,AFAP1,JAM3,JMY,FMN1
7_Member	GO Biological Processes	GO:0010638	positive regulation of organelle organization	-4.92712	-2.99044	43/641	25,546,1634,1906,2241,2764,2885,3091,3643,3799,4000,4088,5081,5341,5570,6382,6385,6721,7016,7046,7456,8829,9252,9776,9873,9927,10152,10787,22843,23028,51024,54471,55704,55729,57154,57606,79443,80351,90427,93624,133746,255967,342184	ABL1,ATRX,DCN,EDN1,FER,GMFB,GRB2,HIF1A,INSR,KIF5B,LMNA,SMAD3,PAX7,PLEK,PKIB,SDC1,SDC4,SREBF2,TESK1,TGFBR1,WIPF1,NRP1,RPS6KA5,ATG13,FCHSD2,MFN2,ABI2,NCKAP1,PPM1E,KDM1A,FIS1,MIEF1,CCDC88A,ATF7IP,SMURF1,SLAIN2,FYCO1,TNKS2,BMF,TADA2B,JMY,PAN3,FMN1
7_Member	GO Biological Processes	GO:1902903	regulation of supramolecular fiber organization	-4.70326	-2.83378	29/370	25,118,120,1906,2241,2764,2885,4088,5341,5962,6385,7016,7046,7082,7456,8500,8829,9873,10152,10395,10787,22843,29766,55704,57551,57580,57606,133746,342184	ABL1,ADD1,ADD3,EDN1,FER,GMFB,GRB2,SMAD3,PLEK,RDX,SDC4,TESK1,TGFBR1,TJP1,WIPF1,PPFIA1,NRP1,FCHSD2,ABI2,DLC1,NCKAP1,PPM1E,TMOD3,CCDC88A,TAOK1,PREX1,SLAIN2,JMY,FMN1
7_Member	GO Biological Processes	GO:1902905	positive regulation of supramolecular fiber organization	-4.59113	-2.74905	20/210	25,1906,2241,2764,2885,4088,5341,6385,7016,7046,7456,8829,9873,10152,10787,22843,55704,57606,133746,342184	ABL1,EDN1,FER,GMFB,GRB2,SMAD3,PLEK,SDC4,TESK1,TGFBR1,WIPF1,NRP1,FCHSD2,ABI2,NCKAP1,PPM1E,CCDC88A,SLAIN2,JMY,FMN1
7_Member	GO Biological Processes	GO:0044089	positive regulation of cellular component biogenesis	-4.54809	-2.71515	38/559	19,25,538,627,857,1015,1906,2241,2764,2885,4088,5341,6382,6385,7016,7046,7058,7456,8027,8450,8451,8826,8829,9873,10152,10787,22843,22871,23284,23433,55704,57606,90427,96459,133746,143098,255967,342184	ABCA1,ABL1,ATP7A,BDNF,CAV1,CDH17,EDN1,FER,GMFB,GRB2,SMAD3,PLEK,SDC1,SDC4,TESK1,TGFBR1,THBS2,WIPF1,STAM,CUL4B,CUL4A,IQGAP1,NRP1,FCHSD2,ABI2,NCKAP1,PPM1E,NLGN1,ADGRL3,RHOQ,CCDC88A,SLAIN2,BMF,FNIP1,JMY,MPP7,PAN3,FMN1
7_Member	GO Biological Processes	GO:0051495	positive regulation of cytoskeleton organization	-3.98238	-2.27809	20/232	25,1906,2241,2764,2885,4088,5341,6385,7016,7046,7456,8829,9873,10152,10787,22843,55704,57606,133746,342184	ABL1,EDN1,FER,GMFB,GRB2,SMAD3,PLEK,SDC4,TESK1,TGFBR1,WIPF1,NRP1,FCHSD2,ABI2,NCKAP1,PPM1E,CCDC88A,SLAIN2,JMY,FMN1
7_Member	GO Biological Processes	GO:0051127	positive regulation of actin nucleation	-3.62078	-2.00643	5/18	7456,9873,10152,10787,342184	WIPF1,FCHSD2,ABI2,NCKAP1,FMN1
7_Member	GO Biological Processes	GO:0008154	actin polymerization or depolymerization	-3.51344	-1.92561	18/214	118,120,2241,2764,2885,3717,5341,5962,7456,9645,9873,10152,10787,29766,57580,81624,133746,342184	ADD1,ADD3,FER,GMFB,GRB2,JAK2,PLEK,RDX,WIPF1,MICAL2,FCHSD2,ABI2,NCKAP1,TMOD3,PREX1,DIAPH3,JMY,FMN1
7_Member	GO Biological Processes	GO:0030041	actin filament polymerization	-3.24377	-1.72175	16/188	118,120,2241,2764,2885,3717,5962,7456,9873,10152,10787,29766,57580,81624,133746,342184	ADD1,ADD3,FER,GMFB,GRB2,JAK2,RDX,WIPF1,FCHSD2,ABI2,NCKAP1,TMOD3,PREX1,DIAPH3,JMY,FMN1
7_Member	GO Biological Processes	GO:0051125	regulation of actin nucleation	-3.24205	-1.72175	6/32	2764,7456,9873,10152,10787,342184	GMFB,WIPF1,FCHSD2,ABI2,NCKAP1,FMN1
7_Member	GO Biological Processes	GO:0008064	regulation of actin polymerization or depolymerization	-2.81756	-1.42396	15/187	118,120,2241,2764,2885,5341,5962,7456,9873,10152,10787,29766,57580,133746,342184	ADD1,ADD3,FER,GMFB,GRB2,PLEK,RDX,WIPF1,FCHSD2,ABI2,NCKAP1,TMOD3,PREX1,JMY,FMN1
7_Member	GO Biological Processes	GO:0030832	regulation of actin filament length	-2.79464	-1.40822	15/188	118,120,2241,2764,2885,5341,5962,7456,9873,10152,10787,29766,57580,133746,342184	ADD1,ADD3,FER,GMFB,GRB2,PLEK,RDX,WIPF1,FCHSD2,ABI2,NCKAP1,TMOD3,PREX1,JMY,FMN1
7_Member	GO Biological Processes	GO:0030833	regulation of actin filament polymerization	-2.74987	-1.37222	14/171	118,120,2241,2764,2885,5962,7456,9873,10152,10787,29766,57580,133746,342184	ADD1,ADD3,FER,GMFB,GRB2,RDX,WIPF1,FCHSD2,ABI2,NCKAP1,TMOD3,PREX1,JMY,FMN1
7_Member	GO Biological Processes	GO:2000601	positive regulation of Arp2/3 complex-mediated actin nucleation	-2.74276	-1.37222	3/8	9873,10152,10787	FCHSD2,ABI2,NCKAP1
7_Member	GO Biological Processes	GO:0043254	regulation of protein complex assembly	-2.6982	-1.33814	29/488	19,25,118,120,1015,2241,2764,2885,5341,5962,7456,8450,8451,9873,10152,10787,23493,29091,29766,55729,57580,57606,83700,90427,96459,133746,143098,255967,342184	ABCA1,ABL1,ADD1,ADD3,CDH17,FER,GMFB,GRB2,PLEK,RDX,WIPF1,CUL4B,CUL4A,FCHSD2,ABI2,NCKAP1,HEY2,STXBP6,TMOD3,ATF7IP,PREX1,SLAIN2,JAM3,BMF,FNIP1,JMY,MPP7,PAN3,FMN1
7_Member	GO Biological Processes	GO:0045010	actin nucleation	-2.65499	-1.31057	7/55	2764,7456,9873,10152,10787,133746,342184	GMFB,WIPF1,FCHSD2,ABI2,NCKAP1,JMY,FMN1
7_Member	GO Biological Processes	GO:0034315	regulation of Arp2/3 complex-mediated actin nucleation	-2.59254	-1.26021	4/18	2764,9873,10152,10787	GMFB,FCHSD2,ABI2,NCKAP1
7_Member	GO Biological Processes	GO:0031334	positive regulation of protein complex assembly	-2.47517	-1.1668	19/285	19,1015,2241,2764,2885,5341,7456,8450,8451,9873,10152,10787,57606,90427,96459,133746,143098,255967,342184	ABCA1,CDH17,FER,GMFB,GRB2,PLEK,WIPF1,CUL4B,CUL4A,FCHSD2,ABI2,NCKAP1,SLAIN2,BMF,FNIP1,JMY,MPP7,PAN3,FMN1
7_Member	GO Biological Processes	GO:0032271	regulation of protein polymerization	-2.38115	-1.09435	16/228	25,118,120,2241,2764,2885,5962,7456,9873,10152,10787,29766,57580,57606,133746,342184	ABL1,ADD1,ADD3,FER,GMFB,GRB2,RDX,WIPF1,FCHSD2,ABI2,NCKAP1,TMOD3,PREX1,SLAIN2,JMY,FMN1
7_Member	GO Biological Processes	GO:0030838	positive regulation of actin filament polymerization	-2.13183	-0.916069	9/103	2241,2764,2885,7456,9873,10152,10787,133746,342184	FER,GMFB,GRB2,WIPF1,FCHSD2,ABI2,NCKAP1,JMY,FMN1
7_Member	GO Biological Processes	GO:0034314	Arp2/3 complex-mediated actin nucleation	-2.09095	-0.888241	5/38	2764,9873,10152,10787,133746	GMFB,FCHSD2,ABI2,NCKAP1,JMY
7_Member	GO Biological Processes	GO:0051258	protein polymerization	-2.0623	-0.86367	18/290	25,118,120,2241,2764,2885,3717,5962,7456,9873,10152,10787,29766,57580,57606,81624,133746,342184	ABL1,ADD1,ADD3,FER,GMFB,GRB2,JAK2,RDX,WIPF1,FCHSD2,ABI2,NCKAP1,TMOD3,PREX1,SLAIN2,DIAPH3,JMY,FMN1
8_Summary	GO Biological Processes	GO:0031589	cell-substrate adhesion	-10.8178	-7.71862	40/353	25,613,683,960,1012,1295,1398,2042,2192,2241,2294,2335,2651,3655,3685,3696,3717,3915,4088,6385,6789,7414,8500,8516,8826,8829,9748,10395,10580,10631,29780,54453,55679,55742,57580,83700,84168,133584,340485,342184,118,421,857,1015,1948,2149,2697,5318,5586,5962,7046,7082,143098,204851,120,388,5341,7016,22843,55704,1906,4627,5156,9578,29766	ABL1,BCR,BST1,CD44,CDH13,COL8A1,CRK,EPHA3,FBLN1,FER,FOXF1,FN1,GCNT2,ITGA6,ITGAV,ITGB8,JAK2,LAMC1,SMAD3,SDC4,STK4,VCL,PPFIA1,ITGA8,IQGAP1,NRP1,SLK,DLC1,SORBS1,POSTN,PARVB,RIN2,LIMS2,PARVA,PREX1,JAM3,ANTXR1,EGFLAM,ACER2,FMN1,ADD1,ARVCF,CAV1,CDH17,EFNB2,F2R,GJA1,PKP2,PKN2,RDX,TGFBR1,TJP1,MPP7,HIPK1,ADD3,RHOB,PLEK,TESK1,PPM1E,CCDC88A,EDN1,MYH9,PDGFRA,CDC42BPB,TMOD3
8_Member	GO Biological Processes	GO:0031589	cell-substrate adhesion	-10.8178	-7.71862	40/353	25,613,683,960,1012,1295,1398,2042,2192,2241,2294,2335,2651,3655,3685,3696,3717,3915,4088,6385,6789,7414,8500,8516,8826,8829,9748,10395,10580,10631,29780,54453,55679,55742,57580,83700,84168,133584,340485,342184	ABL1,BCR,BST1,CD44,CDH13,COL8A1,CRK,EPHA3,FBLN1,FER,FOXF1,FN1,GCNT2,ITGA6,ITGAV,ITGB8,JAK2,LAMC1,SMAD3,SDC4,STK4,VCL,PPFIA1,ITGA8,IQGAP1,NRP1,SLK,DLC1,SORBS1,POSTN,PARVB,RIN2,LIMS2,PARVA,PREX1,JAM3,ANTXR1,EGFLAM,ACER2,FMN1
8_Member	GO Biological Processes	GO:0010810	regulation of cell-substrate adhesion	-8.47075	-5.77612	27/215	25,683,1012,1295,1398,2042,2192,2294,2335,2651,3655,3717,4088,6385,6789,7414,8826,8829,9748,10395,10631,54453,55679,57580,133584,340485,342184	ABL1,BST1,CDH13,COL8A1,CRK,EPHA3,FBLN1,FOXF1,FN1,GCNT2,ITGA6,JAK2,SMAD3,SDC4,STK4,VCL,IQGAP1,NRP1,SLK,DLC1,POSTN,RIN2,LIMS2,PREX1,EGFLAM,ACER2,FMN1
8_Member	GO Biological Processes	GO:0034330	cell junction organization	-8.16653	-5.54445	32/299	25,118,421,613,857,1012,1015,1948,2042,2149,2335,2697,3655,3915,4088,5318,5586,5962,6385,7046,7082,7414,8826,8829,9748,10395,10580,55679,83700,143098,204851,342184	ABL1,ADD1,ARVCF,BCR,CAV1,CDH13,CDH17,EFNB2,EPHA3,F2R,FN1,GJA1,ITGA6,LAMC1,SMAD3,PKP2,PKN2,RDX,SDC4,TGFBR1,TJP1,VCL,IQGAP1,NRP1,SLK,DLC1,SORBS1,LIMS2,JAM3,MPP7,HIPK1,FMN1
8_Member	GO Biological Processes	GO:0034329	cell junction assembly	-7.18096	-4.73866	27/247	25,421,613,857,1012,1015,2042,2335,2697,3655,3915,4088,5318,5586,6385,7082,7414,8826,8829,9748,10395,10580,55679,83700,143098,204851,342184	ABL1,ARVCF,BCR,CAV1,CDH13,CDH17,EPHA3,FN1,GJA1,ITGA6,LAMC1,SMAD3,PKP2,PKN2,SDC4,TJP1,VCL,IQGAP1,NRP1,SLK,DLC1,SORBS1,LIMS2,JAM3,MPP7,HIPK1,FMN1
8_Member	GO Biological Processes	GO:0010811	positive regulation of cell-substrate adhesion	-7.03578	-4.61503	18/120	25,1012,1295,1398,2294,2335,3655,3717,4088,6385,6789,8826,8829,54453,55679,57580,133584,342184	ABL1,CDH13,COL8A1,CRK,FOXF1,FN1,ITGA6,JAK2,SMAD3,SDC4,STK4,IQGAP1,NRP1,RIN2,LIMS2,PREX1,EGFLAM,FMN1
8_Member	GO Biological Processes	GO:0034332	adherens junction organization	-6.97044	-4.56347	20/148	25,118,613,1012,1015,1948,2042,4088,5962,6385,7082,7414,8826,8829,9748,10395,10580,83700,204851,342184	ABL1,ADD1,BCR,CDH13,CDH17,EFNB2,EPHA3,SMAD3,RDX,SDC4,TJP1,VCL,IQGAP1,NRP1,SLK,DLC1,SORBS1,JAM3,HIPK1,FMN1
8_Member	GO Biological Processes	GO:0007160	cell-matrix adhesion	-6.68609	-4.3118	25/229	25,613,683,960,1012,2042,2335,3655,3685,3696,4088,6385,7414,8500,8516,8826,8829,9748,10395,10580,10631,54453,83700,340485,342184	ABL1,BCR,BST1,CD44,CDH13,EPHA3,FN1,ITGA6,ITGAV,ITGB8,SMAD3,SDC4,VCL,PPFIA1,ITGA8,IQGAP1,NRP1,SLK,DLC1,SORBS1,POSTN,RIN2,JAM3,ACER2,FMN1
8_Member	GO Biological Processes	GO:0007044	cell-substrate junction assembly	-6.02568	-3.79025	15/99	25,613,2042,2335,3655,3915,4088,6385,7414,8826,8829,9748,10395,10580,342184	ABL1,BCR,EPHA3,FN1,ITGA6,LAMC1,SMAD3,SDC4,VCL,IQGAP1,NRP1,SLK,DLC1,SORBS1,FMN1
8_Member	GO Biological Processes	GO:0034333	adherens junction assembly	-5.57403	-3.47147	14/94	25,613,2042,4088,6385,7414,8826,8829,9748,10395,10580,83700,204851,342184	ABL1,BCR,EPHA3,SMAD3,SDC4,VCL,IQGAP1,NRP1,SLK,DLC1,SORBS1,JAM3,HIPK1,FMN1
8_Member	GO Biological Processes	GO:1903391	regulation of adherens junction organization	-5.51725	-3.42468	12/70	25,118,2042,4088,5962,6385,7414,8826,8829,9748,10395,342184	ABL1,ADD1,EPHA3,SMAD3,RDX,SDC4,VCL,IQGAP1,NRP1,SLK,DLC1,FMN1
8_Member	GO Biological Processes	GO:0001952	regulation of cell-matrix adhesion	-4.83352	-2.92141	15/123	25,683,1012,2042,4088,6385,7414,8826,8829,9748,10395,10631,54453,340485,342184	ABL1,BST1,CDH13,EPHA3,SMAD3,SDC4,VCL,IQGAP1,NRP1,SLK,DLC1,POSTN,RIN2,ACER2,FMN1
8_Member	GO Biological Processes	GO:1901888	regulation of cell junction assembly	-4.75864	-2.86771	13/96	25,857,2042,2697,4088,6385,7082,7414,8826,8829,9748,10395,342184	ABL1,CAV1,EPHA3,GJA1,SMAD3,SDC4,TJP1,VCL,IQGAP1,NRP1,SLK,DLC1,FMN1
8_Member	GO Biological Processes	GO:0007045	cell-substrate adherens junction assembly	-4.72948	-2.84471	12/83	25,613,2042,4088,6385,7414,8826,8829,9748,10395,10580,342184	ABL1,BCR,EPHA3,SMAD3,SDC4,VCL,IQGAP1,NRP1,SLK,DLC1,SORBS1,FMN1
8_Member	GO Biological Processes	GO:0048041	focal adhesion assembly	-4.72948	-2.84471	12/83	25,613,2042,4088,6385,7414,8826,8829,9748,10395,10580,342184	ABL1,BCR,EPHA3,SMAD3,SDC4,VCL,IQGAP1,NRP1,SLK,DLC1,SORBS1,FMN1
8_Member	GO Biological Processes	GO:0051893	regulation of focal adhesion assembly	-4.39338	-2.59353	10/63	25,2042,4088,6385,7414,8826,8829,9748,10395,342184	ABL1,EPHA3,SMAD3,SDC4,VCL,IQGAP1,NRP1,SLK,DLC1,FMN1
8_Member	GO Biological Processes	GO:0090109	regulation of cell-substrate junction assembly	-4.39338	-2.59353	10/63	25,2042,4088,6385,7414,8826,8829,9748,10395,342184	ABL1,EPHA3,SMAD3,SDC4,VCL,IQGAP1,NRP1,SLK,DLC1,FMN1
8_Member	GO Biological Processes	GO:0051017	actin filament bundle assembly	-4.38964	-2.59147	17/166	25,118,120,388,4088,5341,5962,6385,7016,7046,7082,8500,8829,10395,10580,22843,55704	ABL1,ADD1,ADD3,RHOB,SMAD3,PLEK,RDX,SDC4,TESK1,TGFBR1,TJP1,PPFIA1,NRP1,DLC1,SORBS1,PPM1E,CCDC88A
8_Member	GO Biological Processes	GO:0032231	regulation of actin filament bundle assembly	-4.38286	-2.58636	13/104	25,4088,5341,5962,6385,7016,7046,7082,8500,8829,10395,22843,55704	ABL1,SMAD3,PLEK,RDX,SDC4,TESK1,TGFBR1,TJP1,PPFIA1,NRP1,DLC1,PPM1E,CCDC88A
8_Member	GO Biological Processes	GO:0061572	actin filament bundle organization	-4.25842	-2.48619	17/170	25,118,120,388,4088,5341,5962,6385,7016,7046,7082,8500,8829,10395,10580,22843,55704	ABL1,ADD1,ADD3,RHOB,SMAD3,PLEK,RDX,SDC4,TESK1,TGFBR1,TJP1,PPFIA1,NRP1,DLC1,SORBS1,PPM1E,CCDC88A
8_Member	GO Biological Processes	GO:1903393	positive regulation of adherens junction organization	-4.24269	-2.47825	7/31	25,118,4088,6385,8826,8829,342184	ABL1,ADD1,SMAD3,SDC4,IQGAP1,NRP1,FMN1
8_Member	GO Biological Processes	GO:0051894	positive regulation of focal adhesion assembly	-3.86499	-2.18841	6/25	25,4088,6385,8826,8829,342184	ABL1,SMAD3,SDC4,IQGAP1,NRP1,FMN1
8_Member	GO Biological Processes	GO:0110020	regulation of actomyosin structure organization	-3.83462	-2.1643	12/102	25,1906,4088,6385,7016,7046,7082,8500,8829,10395,22843,55704	ABL1,EDN1,SMAD3,SDC4,TESK1,TGFBR1,TJP1,PPFIA1,NRP1,DLC1,PPM1E,CCDC88A
8_Member	GO Biological Processes	GO:1901890	positive regulation of cell junction assembly	-3.80378	-2.13964	7/36	25,857,4088,6385,8826,8829,342184	ABL1,CAV1,SMAD3,SDC4,IQGAP1,NRP1,FMN1
8_Member	GO Biological Processes	GO:0032233	positive regulation of actin filament bundle assembly	-3.70246	-2.06681	9/62	25,4088,5341,6385,7016,7046,8829,22843,55704	ABL1,SMAD3,PLEK,SDC4,TESK1,TGFBR1,NRP1,PPM1E,CCDC88A
8_Member	GO Biological Processes	GO:0051492	regulation of stress fiber assembly	-3.66711	-2.03998	11/91	25,4088,6385,7016,7046,7082,8500,8829,10395,22843,55704	ABL1,SMAD3,SDC4,TESK1,TGFBR1,TJP1,PPFIA1,NRP1,DLC1,PPM1E,CCDC88A
8_Member	GO Biological Processes	GO:0030038	contractile actin filament bundle assembly	-3.63656	-2.01891	12/107	25,4088,6385,7016,7046,7082,8500,8829,10395,10580,22843,55704	ABL1,SMAD3,SDC4,TESK1,TGFBR1,TJP1,PPFIA1,NRP1,DLC1,SORBS1,PPM1E,CCDC88A
8_Member	GO Biological Processes	GO:0043149	stress fiber assembly	-3.63656	-2.01891	12/107	25,4088,6385,7016,7046,7082,8500,8829,10395,10580,22843,55704	ABL1,SMAD3,SDC4,TESK1,TGFBR1,TJP1,PPFIA1,NRP1,DLC1,SORBS1,PPM1E,CCDC88A
8_Member	GO Biological Processes	GO:0051496	positive regulation of stress fiber assembly	-3.5276	-1.93667	8/52	25,4088,6385,7016,7046,8829,22843,55704	ABL1,SMAD3,SDC4,TESK1,TGFBR1,NRP1,PPM1E,CCDC88A
8_Member	GO Biological Processes	GO:0001954	positive regulation of cell-matrix adhesion	-3.46922	-1.89155	8/53	25,1012,4088,6385,8826,8829,54453,342184	ABL1,CDH13,SMAD3,SDC4,IQGAP1,NRP1,RIN2,FMN1
8_Member	GO Biological Processes	GO:0031032	actomyosin structure organization	-3.37863	-1.82254	17/201	25,1906,4088,4627,5156,6385,7016,7046,7082,8500,8829,9578,10395,10580,22843,29766,55704	ABL1,EDN1,SMAD3,MYH9,PDGFRA,SDC4,TESK1,TGFBR1,TJP1,PPFIA1,NRP1,CDC42BPB,DLC1,SORBS1,PPM1E,TMOD3,CCDC88A
9_Summary	GO Biological Processes	GO:0043009	chordate embryonic development	-9.68015	-6.69746	55/646	25,92,118,207,320,538,653,657,659,1906,2034,2294,2885,3091,3516,3705,4088,4124,4627,5081,5087,5125,5156,6046,6385,6497,6659,6789,7046,7048,7477,8321,8451,8648,9871,9915,9927,10087,10365,10395,10512,10568,10672,22846,23038,23250,23493,50515,55626,60529,151449,199221,201895,203447,441478,613,1295,1843,1847,2114,2132,2335,2697,3685,4313,4646,5915,7296,7358,8516,9645,10413,23275,26018,54806,55614,849…	ABL1,ACVR2A,ADD1,AKT1,APBA1,ATP7A,BMP5,BMPR1A,BMPR2,EDN1,EPAS1,FOXF1,GRB2,HIF1A,RBPJ,ITPK1,SMAD3,MAN2A1,MYH9,PAX7,PBX1,PCSK5,PDGFRA,BRD2,SDC4,SKI,SOX4,STK4,TGFBR1,TGFBR2,WNT7B,FZD1,CUL4A,NCOA1,SEC24D,ARNT2,MFN2,CERT1,KLF2,DLC1,SEMA3C,SLC34A2,GNA13,VASH1,WDTC1,ATP11A,HEY2,CHST11,AMBRA1,ALX4,GDF7,DZIP1L,SMIM14,NRK,NRARP,BCR,COL8A1,DUSP1,DUSP5,ETS2,EXT2,FN1,GJA1,ITGAV,MMP2,MYO6,RARB,TXNRD1,UGDH,ITGA…
9_Member	GO Biological Processes	GO:0043009	chordate embryonic development	-9.68015	-6.69746	55/646	25,92,118,207,320,538,653,657,659,1906,2034,2294,2885,3091,3516,3705,4088,4124,4627,5081,5087,5125,5156,6046,6385,6497,6659,6789,7046,7048,7477,8321,8451,8648,9871,9915,9927,10087,10365,10395,10512,10568,10672,22846,23038,23250,23493,50515,55626,60529,151449,199221,201895,203447,441478	ABL1,ACVR2A,ADD1,AKT1,APBA1,ATP7A,BMP5,BMPR1A,BMPR2,EDN1,EPAS1,FOXF1,GRB2,HIF1A,RBPJ,ITPK1,SMAD3,MAN2A1,MYH9,PAX7,PBX1,PCSK5,PDGFRA,BRD2,SDC4,SKI,SOX4,STK4,TGFBR1,TGFBR2,WNT7B,FZD1,CUL4A,NCOA1,SEC24D,ARNT2,MFN2,CERT1,KLF2,DLC1,SEMA3C,SLC34A2,GNA13,VASH1,WDTC1,ATP11A,HEY2,CHST11,AMBRA1,ALX4,GDF7,DZIP1L,SMIM14,NRK,NRARP
9_Member	GO Biological Processes	GO:0009792	embryo development ending in birth or egg hatching	-9.24093	-6.42573	55/664	25,92,118,207,320,538,653,657,659,1906,2034,2294,2885,3091,3516,3705,4088,4124,4627,5081,5087,5125,5156,6046,6385,6497,6659,6789,7046,7048,7477,8321,8451,8648,9871,9915,9927,10087,10365,10395,10512,10568,10672,22846,23038,23250,23493,50515,55626,60529,151449,199221,201895,203447,441478	ABL1,ACVR2A,ADD1,AKT1,APBA1,ATP7A,BMP5,BMPR1A,BMPR2,EDN1,EPAS1,FOXF1,GRB2,HIF1A,RBPJ,ITPK1,SMAD3,MAN2A1,MYH9,PAX7,PBX1,PCSK5,PDGFRA,BRD2,SDC4,SKI,SOX4,STK4,TGFBR1,TGFBR2,WNT7B,FZD1,CUL4A,NCOA1,SEC24D,ARNT2,MFN2,CERT1,KLF2,DLC1,SEMA3C,SLC34A2,GNA13,VASH1,WDTC1,ATP11A,HEY2,CHST11,AMBRA1,ALX4,GDF7,DZIP1L,SMIM14,NRK,NRARP
9_Member	GO Biological Processes	GO:0048598	embryonic morphogenesis	-8.99003	-6.20825	51/600	25,92,613,653,657,659,1295,1843,1847,1906,2114,2132,2294,2335,2697,2885,3091,3685,4088,4313,4646,5087,5156,5915,6046,6385,6497,6659,6789,7046,7048,7296,7358,7477,8321,8516,8648,9645,10395,10413,23275,26018,50515,54806,55614,60529,84913,125488,151449,204851,341640	ABL1,ACVR2A,BCR,BMP5,BMPR1A,BMPR2,COL8A1,DUSP1,DUSP5,EDN1,ETS2,EXT2,FOXF1,FN1,GJA1,GRB2,HIF1A,ITGAV,SMAD3,MMP2,MYO6,PBX1,PDGFRA,RARB,BRD2,SDC4,SKI,SOX4,STK4,TGFBR1,TGFBR2,TXNRD1,UGDH,WNT7B,FZD1,ITGA8,NCOA1,MICAL2,DLC1,YAP1,POFUT2,LRIG1,CHST11,AHI1,KIF16B,ALX4,ATOH8,TTC39C,GDF7,HIPK1,FREM2
9_Member	GO Biological Processes	GO:0001701	in utero embryonic development	-7.55303	-5.03008	36/385	118,207,320,538,653,657,1906,2034,2294,2885,3091,3516,4088,4124,4627,5156,6789,7046,7048,7477,8451,8648,9871,9915,9927,10087,10365,10568,10672,22846,23038,23250,23493,50515,201895,203447	ADD1,AKT1,APBA1,ATP7A,BMP5,BMPR1A,EDN1,EPAS1,FOXF1,GRB2,HIF1A,RBPJ,SMAD3,MAN2A1,MYH9,PDGFRA,STK4,TGFBR1,TGFBR2,WNT7B,CUL4A,NCOA1,SEC24D,ARNT2,MFN2,CERT1,KLF2,SLC34A2,GNA13,VASH1,WDTC1,ATP11A,HEY2,CHST11,SMIM14,NRK
9_Member	GO Biological Processes	GO:0048568	embryonic organ development	-5.16865	-3.15141	34/445	207,613,653,657,1906,2034,2294,2885,3091,3516,4088,4646,5087,5125,5156,5915,6789,7046,7048,7477,8516,8648,9645,10019,10413,22846,23493,26018,50515,54806,60529,125488,203447,204851	AKT1,BCR,BMP5,BMPR1A,EDN1,EPAS1,FOXF1,GRB2,HIF1A,RBPJ,SMAD3,MYO6,PBX1,PCSK5,PDGFRA,RARB,STK4,TGFBR1,TGFBR2,WNT7B,ITGA8,NCOA1,MICAL2,SH2B3,YAP1,VASH1,HEY2,LRIG1,CHST11,AHI1,ALX4,TTC39C,NRK,HIPK1
9_Member	GO Biological Processes	GO:0048562	embryonic organ morphogenesis	-2.23755	-0.995682	19/300	613,1906,2294,3091,4088,4646,5156,5915,7046,7048,8516,9645,10413,26018,50515,54806,60529,125488,204851	BCR,EDN1,FOXF1,HIF1A,SMAD3,MYO6,PDGFRA,RARB,TGFBR1,TGFBR2,ITGA8,MICAL2,YAP1,LRIG1,CHST11,AHI1,ALX4,TTC39C,HIPK1
10_Summary	GO Biological Processes	GO:0030155	regulation of cell adhesion	-9.34775	-6.47347	58/716	25,27,207,288,683,857,960,1012,1295,1398,1432,1843,1948,1960,2042,2113,2192,2267,2294,2335,2651,2885,3655,3685,3716,3717,4088,5140,5294,5530,5592,5962,6385,6789,7048,7082,7414,7525,8767,8772,8826,8829,9748,9891,10019,10395,10631,27242,54453,55679,57580,83700,84959,133584,140885,340485,342184,441478,538,1958,2281,4627,4773,5660,6659,26022,57630,1015,2353,3516,6688,8111,8451,8792,28962,96459,135228…	ABL1,ABL2,AKT1,ANK3,BST1,CAV1,CD44,CDH13,COL8A1,CRK,MAPK14,DUSP1,EFNB2,EGR3,EPHA3,ETS1,FBLN1,FGL1,FOXF1,FN1,GCNT2,GRB2,ITGA6,ITGAV,JAK1,JAK2,SMAD3,PDE3B,PIK3CG,PPP3CA,PRKG1,RDX,SDC4,STK4,TGFBR2,TJP1,VCL,YES1,RIPK2,FADD,IQGAP1,NRP1,SLK,NUAK1,SH2B3,DLC1,POSTN,TNFRSF21,RIN2,LIMS2,PREX1,JAM3,UBASH3B,EGFLAM,SIRPA,ACER2,FMN1,NRARP,ATP7A,EGR1,FKBP1B,MYH9,NFATC2,PSAP,SOX4,TMEM98,SH3RF1,CDH17,FOS,RBPJ,SPI…
10_Member	GO Biological Processes	GO:0030155	regulation of cell adhesion	-9.34775	-6.47347	58/716	25,27,207,288,683,857,960,1012,1295,1398,1432,1843,1948,1960,2042,2113,2192,2267,2294,2335,2651,2885,3655,3685,3716,3717,4088,5140,5294,5530,5592,5962,6385,6789,7048,7082,7414,7525,8767,8772,8826,8829,9748,9891,10019,10395,10631,27242,54453,55679,57580,83700,84959,133584,140885,340485,342184,441478	ABL1,ABL2,AKT1,ANK3,BST1,CAV1,CD44,CDH13,COL8A1,CRK,MAPK14,DUSP1,EFNB2,EGR3,EPHA3,ETS1,FBLN1,FGL1,FOXF1,FN1,GCNT2,GRB2,ITGA6,ITGAV,JAK1,JAK2,SMAD3,PDE3B,PIK3CG,PPP3CA,PRKG1,RDX,SDC4,STK4,TGFBR2,TJP1,VCL,YES1,RIPK2,FADD,IQGAP1,NRP1,SLK,NUAK1,SH2B3,DLC1,POSTN,TNFRSF21,RIN2,LIMS2,PREX1,JAM3,UBASH3B,EGFLAM,SIRPA,ACER2,FMN1,NRARP
10_Member	GO Biological Processes	GO:0045785	positive regulation of cell adhesion	-6.71023	-4.32556	36/416	25,207,288,857,960,1012,1295,1398,1948,1960,2113,2294,2335,2651,2885,3655,3685,3716,3717,4088,5530,6385,6789,7048,7082,7525,8767,8772,8826,8829,54453,55679,57580,133584,140885,342184	ABL1,AKT1,ANK3,CAV1,CD44,CDH13,COL8A1,CRK,EFNB2,EGR3,ETS1,FOXF1,FN1,GCNT2,GRB2,ITGA6,ITGAV,JAK1,JAK2,SMAD3,PPP3CA,SDC4,STK4,TGFBR2,TJP1,YES1,RIPK2,FADD,IQGAP1,NRP1,RIN2,LIMS2,PREX1,EGFLAM,SIRPA,FMN1
10_Member	GO Biological Processes	GO:0022407	regulation of cell-cell adhesion	-3.34206	-1.79356	28/422	25,207,288,857,960,1432,1948,1960,2113,2267,2651,2885,3655,3716,3717,5592,5962,6385,7048,7082,7525,8767,8772,10019,27242,84959,140885,441478	ABL1,AKT1,ANK3,CAV1,CD44,MAPK14,EFNB2,EGR3,ETS1,FGL1,GCNT2,GRB2,ITGA6,JAK1,JAK2,PRKG1,RDX,SDC4,TGFBR2,TJP1,YES1,RIPK2,FADD,SH2B3,TNFRSF21,UBASH3B,SIRPA,NRARP
10_Member	GO Biological Processes	GO:0042110	T cell activation	-2.91427	-1.49426	29/472	25,207,538,857,960,1948,1958,1960,2267,2281,2885,4088,4627,4773,5294,5530,5660,6385,6659,7048,7525,8767,8772,26022,27242,57580,57630,140885,441478	ABL1,AKT1,ATP7A,CAV1,CD44,EFNB2,EGR1,EGR3,FGL1,FKBP1B,GRB2,SMAD3,MYH9,NFATC2,PIK3CG,PPP3CA,PSAP,SDC4,SOX4,TGFBR2,YES1,RIPK2,FADD,TMEM98,TNFRSF21,PREX1,SH3RF1,SIRPA,NRARP
10_Member	GO Biological Processes	GO:0002521	leukocyte differentiation	-2.28472	-1.03205	29/522	25,538,1015,1432,1958,1960,2353,3516,4627,4773,5660,6659,6688,7048,8111,8451,8767,8772,8792,26022,28962,57580,57630,84959,96459,135228,139716,286410,441478	ABL1,ATP7A,CDH17,MAPK14,EGR1,EGR3,FOS,RBPJ,MYH9,NFATC2,PSAP,SOX4,SPI1,TGFBR2,GPR68,CUL4A,RIPK2,FADD,TNFRSF11A,TMEM98,OSTM1,PREX1,SH3RF1,UBASH3B,FNIP1,CD109,GAB3,ATP11C,NRARP
10_Member	GO Biological Processes	GO:0046649	lymphocyte activation	-2.1743	-0.950606	38/748	25,196,207,538,683,857,960,1015,1026,1948,1958,1960,2267,2281,2885,3516,4088,4627,4773,5294,5530,5660,6385,6659,6688,6845,7048,7525,8767,8772,26022,27242,57580,57630,96459,140885,286410,441478	ABL1,AHR,AKT1,ATP7A,BST1,CAV1,CD44,CDH17,CDKN1A,EFNB2,EGR1,EGR3,FGL1,FKBP1B,GRB2,RBPJ,SMAD3,MYH9,NFATC2,PIK3CG,PPP3CA,PSAP,SDC4,SOX4,SPI1,VAMP7,TGFBR2,YES1,RIPK2,FADD,TMEM98,TNFRSF21,PREX1,SH3RF1,FNIP1,SIRPA,ATP11C,NRARP
10_Member	GO Biological Processes	GO:0022409	positive regulation of cell-cell adhesion	-2.04993	-0.855485	17/269	207,288,857,960,1948,1960,2113,2651,2885,3655,3716,7048,7082,7525,8767,8772,140885	AKT1,ANK3,CAV1,CD44,EFNB2,EGR3,ETS1,GCNT2,GRB2,ITGA6,JAK1,TGFBR2,TJP1,YES1,RIPK2,FADD,SIRPA
11_Summary	GO Biological Processes	GO:0043062	extracellular structure organization	-9.31344	-6.47347	42/429	19,25,538,857,960,1295,1634,2113,2191,2192,2294,2335,3655,3685,3696,3915,4015,4017,4060,4088,4313,5156,6382,6385,6646,7046,7837,8027,8516,9388,9509,9619,10631,11096,55790,56605,79875,80274,83700,84168,90993,133584	ABCA1,ABL1,ATP7A,CAV1,CD44,COL8A1,DCN,ETS1,FAP,FBLN1,FOXF1,FN1,ITGA6,ITGAV,ITGB8,LAMC1,LOX,LOXL2,LUM,SMAD3,MMP2,PDGFRA,SDC1,SDC4,SOAT1,TGFBR1,PXDN,STAM,ITGA8,LIPG,ADAMTS2,ABCG1,POSTN,ADAMTS5,CSGALNACT1,ERO1B,THSD4,SCUBE1,JAM3,ANTXR1,CREB3L1,EGFLAM
11_Member	GO Biological Processes	GO:0043062	extracellular structure organization	-9.31344	-6.47347	42/429	19,25,538,857,960,1295,1634,2113,2191,2192,2294,2335,3655,3685,3696,3915,4015,4017,4060,4088,4313,5156,6382,6385,6646,7046,7837,8027,8516,9388,9509,9619,10631,11096,55790,56605,79875,80274,83700,84168,90993,133584	ABCA1,ABL1,ATP7A,CAV1,CD44,COL8A1,DCN,ETS1,FAP,FBLN1,FOXF1,FN1,ITGA6,ITGAV,ITGB8,LAMC1,LOX,LOXL2,LUM,SMAD3,MMP2,PDGFRA,SDC1,SDC4,SOAT1,TGFBR1,PXDN,STAM,ITGA8,LIPG,ADAMTS2,ABCG1,POSTN,ADAMTS5,CSGALNACT1,ERO1B,THSD4,SCUBE1,JAM3,ANTXR1,CREB3L1,EGFLAM
11_Member	GO Biological Processes	GO:0030198	extracellular matrix organization	-7.39842	-4.91536	35/373	25,538,857,960,1295,1634,2113,2191,2192,2294,2335,3655,3685,3696,3915,4015,4017,4060,4088,4313,5156,7046,7837,8516,9509,10631,11096,55790,56605,79875,80274,83700,84168,90993,133584	ABL1,ATP7A,CAV1,CD44,COL8A1,DCN,ETS1,FAP,FBLN1,FOXF1,FN1,ITGA6,ITGAV,ITGB8,LAMC1,LOX,LOXL2,LUM,SMAD3,MMP2,PDGFRA,TGFBR1,PXDN,ITGA8,ADAMTS2,POSTN,ADAMTS5,CSGALNACT1,ERO1B,THSD4,SCUBE1,JAM3,ANTXR1,CREB3L1,EGFLAM
12_Summary	GO Biological Processes	GO:0048589	developmental growth	-9.3064	-6.47347	56/680	25,118,207,320,546,627,657,659,688,1026,1432,1906,2335,2697,3516,3643,4088,4654,5081,5530,5660,5738,5915,6532,6586,6789,7046,7048,7049,7414,7477,8455,8470,8826,8828,8829,9201,9215,9706,10252,10365,10413,10512,10631,23038,23493,26524,50515,51393,55717,55841,57154,79068,80351,203447,342184,623,1031,2273,3091,3486,6595,29967,64393,79602,83667,85004,116224	ABL1,ADD1,AKT1,APBA1,ATRX,BDNF,BMPR1A,BMPR2,KLF5,CDKN1A,MAPK14,EDN1,FN1,GJA1,RBPJ,INSR,SMAD3,MYOD1,PAX7,PPP3CA,PSAP,PTGFRN,RARB,SLC6A4,SLIT3,STK4,TGFBR1,TGFBR2,TGFBR3,VCL,WNT7B,ATRN,SORBS2,IQGAP1,NRP2,NRP1,DCLK1,LARGE1,ULK2,SPRY1,KLF2,YAP1,SEMA3C,POSTN,WDTC1,HEY2,LATS2,CHST11,TRPV2,WDR11,WWC3,SMURF1,FTO,TNKS2,NRK,FMN1,BDKRB1,CDKN2C,FHL1,HIF1A,IGFBP3,SMARCA2,LRP12,ZMAT3,ADIPOR2,SESN2,RERG,FAM122A
12_Member	GO Biological Processes	GO:0048589	developmental growth	-9.3064	-6.47347	56/680	25,118,207,320,546,627,657,659,688,1026,1432,1906,2335,2697,3516,3643,4088,4654,5081,5530,5660,5738,5915,6532,6586,6789,7046,7048,7049,7414,7477,8455,8470,8826,8828,8829,9201,9215,9706,10252,10365,10413,10512,10631,23038,23493,26524,50515,51393,55717,55841,57154,79068,80351,203447,342184	ABL1,ADD1,AKT1,APBA1,ATRX,BDNF,BMPR1A,BMPR2,KLF5,CDKN1A,MAPK14,EDN1,FN1,GJA1,RBPJ,INSR,SMAD3,MYOD1,PAX7,PPP3CA,PSAP,PTGFRN,RARB,SLC6A4,SLIT3,STK4,TGFBR1,TGFBR2,TGFBR3,VCL,WNT7B,ATRN,SORBS2,IQGAP1,NRP2,NRP1,DCLK1,LARGE1,ULK2,SPRY1,KLF2,YAP1,SEMA3C,POSTN,WDTC1,HEY2,LATS2,CHST11,TRPV2,WDR11,WWC3,SMURF1,FTO,TNKS2,NRK,FMN1
12_Member	GO Biological Processes	GO:0048638	regulation of developmental growth	-6.07977	-3.83252	31/350	25,207,627,657,659,1026,1432,1906,2335,2697,3516,3643,4654,6532,6789,7046,7048,7049,8455,8829,9706,10413,10512,23493,26524,51393,55841,57154,79068,80351,203447	ABL1,AKT1,BDNF,BMPR1A,BMPR2,CDKN1A,MAPK14,EDN1,FN1,GJA1,RBPJ,INSR,MYOD1,SLC6A4,STK4,TGFBR1,TGFBR2,TGFBR3,ATRN,NRP1,ULK2,YAP1,SEMA3C,HEY2,LATS2,TRPV2,WWC3,SMURF1,FTO,TNKS2,NRK
12_Member	GO Biological Processes	GO:0040008	regulation of growth	-4.88448	-2.95914	45/686	25,207,623,627,657,659,1026,1031,1432,1906,2273,2335,2697,3091,3486,3516,3643,4088,4654,6532,6586,6595,6789,7046,7048,7049,8455,8829,9706,10413,10512,23493,26524,29967,51393,55841,57154,64393,79068,79602,80351,83667,85004,116224,203447	ABL1,AKT1,BDKRB1,BDNF,BMPR1A,BMPR2,CDKN1A,CDKN2C,MAPK14,EDN1,FHL1,FN1,GJA1,HIF1A,IGFBP3,RBPJ,INSR,SMAD3,MYOD1,SLC6A4,SLIT3,SMARCA2,STK4,TGFBR1,TGFBR2,TGFBR3,ATRN,NRP1,ULK2,YAP1,SEMA3C,HEY2,LATS2,LRP12,TRPV2,WWC3,SMURF1,ZMAT3,FTO,ADIPOR2,TNKS2,SESN2,RERG,FAM122A,NRK
12_Member	GO Biological Processes	GO:0048639	positive regulation of developmental growth	-3.69288	-2.05837	17/189	207,627,657,659,1432,1906,2335,3516,3643,4654,7048,7049,8829,10413,23493,51393,57154	AKT1,BDNF,BMPR1A,BMPR2,MAPK14,EDN1,FN1,RBPJ,INSR,MYOD1,TGFBR2,TGFBR3,NRP1,YAP1,HEY2,TRPV2,SMURF1
12_Member	GO Biological Processes	GO:0016049	cell growth	-3.61139	-1.99922	32/490	25,207,623,627,659,1026,1031,1906,2273,2335,2697,3486,4088,6586,6595,7046,7048,7414,8470,8826,8828,8829,9201,9706,10512,10631,51393,57154,79602,83667,85004,116224	ABL1,AKT1,BDKRB1,BDNF,BMPR2,CDKN1A,CDKN2C,EDN1,FHL1,FN1,GJA1,IGFBP3,SMAD3,SLIT3,SMARCA2,TGFBR1,TGFBR2,VCL,SORBS2,IQGAP1,NRP2,NRP1,DCLK1,ULK2,SEMA3C,POSTN,TRPV2,SMURF1,ADIPOR2,SESN2,RERG,FAM122A
12_Member	GO Biological Processes	GO:0045926	negative regulation of growth	-3.54815	-1.95258	20/250	623,659,1026,1031,2273,2697,3091,4088,6532,6586,6595,6789,7048,8829,9706,10512,55841,79602,83667,85004	BDKRB1,BMPR2,CDKN1A,CDKN2C,FHL1,GJA1,HIF1A,SMAD3,SLC6A4,SLIT3,SMARCA2,STK4,TGFBR2,NRP1,ULK2,SEMA3C,WWC3,ADIPOR2,SESN2,RERG
12_Member	GO Biological Processes	GO:0030308	negative regulation of cell growth	-2.84069	-1.44113	15/186	623,659,1026,1031,2273,2697,4088,6586,6595,8829,9706,10512,79602,83667,85004	BDKRB1,BMPR2,CDKN1A,CDKN2C,FHL1,GJA1,SMAD3,SLIT3,SMARCA2,NRP1,ULK2,SEMA3C,ADIPOR2,SESN2,RERG
12_Member	GO Biological Processes	GO:0045927	positive regulation of growth	-2.62907	-1.28925	19/276	207,627,657,659,1432,1906,2335,3516,3643,4654,7046,7048,7049,8829,10413,23493,51393,57154,116224	AKT1,BDNF,BMPR1A,BMPR2,MAPK14,EDN1,FN1,RBPJ,INSR,MYOD1,TGFBR1,TGFBR2,TGFBR3,NRP1,YAP1,HEY2,TRPV2,SMURF1,FAM122A
12_Member	GO Biological Processes	GO:0001558	regulation of cell growth	-2.39986	-1.1084	25/421	25,207,623,627,659,1026,1031,1906,2273,2335,2697,3486,4088,6586,6595,7046,8829,9706,10512,51393,57154,79602,83667,85004,116224	ABL1,AKT1,BDKRB1,BDNF,BMPR2,CDKN1A,CDKN2C,EDN1,FHL1,FN1,GJA1,IGFBP3,SMAD3,SLIT3,SMARCA2,TGFBR1,NRP1,ULK2,SEMA3C,TRPV2,SMURF1,ADIPOR2,SESN2,RERG,FAM122A
13_Summary	GO Biological Processes	GO:0048729	tissue morphogenesis	-9.3064	-6.47347	56/680	25,59,163,388,538,653,657,659,960,1906,1948,2132,2294,2697,2885,3082,3091,3516,4088,4300,4638,5081,5087,5318,6046,6385,6497,6659,6789,7046,7048,7049,7296,7414,7477,8321,8516,8828,8829,9645,10252,10395,10413,10512,10672,23275,23493,54806,55366,55727,57154,57591,151449,341640,342184,441478,627,7068,54829,55679	ABL1,ACTA2,AP2B1,RHOB,ATP7A,BMP5,BMPR1A,BMPR2,CD44,EDN1,EFNB2,EXT2,FOXF1,GJA1,GRB2,HGF,HIF1A,RBPJ,SMAD3,MLLT3,MYLK,PAX7,PBX1,PKP2,BRD2,SDC4,SKI,SOX4,STK4,TGFBR1,TGFBR2,TGFBR3,TXNRD1,VCL,WNT7B,FZD1,ITGA8,NRP2,NRP1,MICAL2,SPRY1,DLC1,YAP1,SEMA3C,GNA13,POFUT2,HEY2,AHI1,LGR4,BTBD7,SMURF1,MRTFA,GDF7,FREM2,FMN1,NRARP,BDNF,THRB,ASPN,LIMS2
13_Member	GO Biological Processes	GO:0048729	tissue morphogenesis	-9.3064	-6.47347	56/680	25,59,163,388,538,653,657,659,960,1906,1948,2132,2294,2697,2885,3082,3091,3516,4088,4300,4638,5081,5087,5318,6046,6385,6497,6659,6789,7046,7048,7049,7296,7414,7477,8321,8516,8828,8829,9645,10252,10395,10413,10512,10672,23275,23493,54806,55366,55727,57154,57591,151449,341640,342184,441478	ABL1,ACTA2,AP2B1,RHOB,ATP7A,BMP5,BMPR1A,BMPR2,CD44,EDN1,EFNB2,EXT2,FOXF1,GJA1,GRB2,HGF,HIF1A,RBPJ,SMAD3,MLLT3,MYLK,PAX7,PBX1,PKP2,BRD2,SDC4,SKI,SOX4,STK4,TGFBR1,TGFBR2,TGFBR3,TXNRD1,VCL,WNT7B,FZD1,ITGA8,NRP2,NRP1,MICAL2,SPRY1,DLC1,YAP1,SEMA3C,GNA13,POFUT2,HEY2,AHI1,LGR4,BTBD7,SMURF1,MRTFA,GDF7,FREM2,FMN1,NRARP
13_Member	GO Biological Processes	GO:0002009	morphogenesis of an epithelium	-6.2141	-3.93037	42/551	25,163,388,538,653,960,1906,1948,2294,2697,2885,3082,3091,3516,4088,4300,5087,6046,6385,6497,6659,6789,7048,7414,7477,8321,8829,9645,10252,10395,10413,10512,10672,54806,55366,55727,57154,57591,151449,341640,342184,441478	ABL1,AP2B1,RHOB,ATP7A,BMP5,CD44,EDN1,EFNB2,FOXF1,GJA1,GRB2,HGF,HIF1A,RBPJ,SMAD3,MLLT3,PBX1,BRD2,SDC4,SKI,SOX4,STK4,TGFBR2,VCL,WNT7B,FZD1,NRP1,MICAL2,SPRY1,DLC1,YAP1,SEMA3C,GNA13,AHI1,LGR4,BTBD7,SMURF1,MRTFA,GDF7,FREM2,FMN1,NRARP
13_Member	GO Biological Processes	GO:0060562	epithelial tube morphogenesis	-5.2713	-3.22251	28/327	25,388,653,1906,1948,2294,3091,3516,4088,5087,6046,6385,6497,6659,6789,7048,8321,8829,9645,10252,10395,10413,10672,54806,55366,151449,342184,441478	ABL1,RHOB,BMP5,EDN1,EFNB2,FOXF1,HIF1A,RBPJ,SMAD3,PBX1,BRD2,SDC4,SKI,SOX4,STK4,TGFBR2,FZD1,NRP1,MICAL2,SPRY1,DLC1,YAP1,GNA13,AHI1,LGR4,GDF7,FMN1,NRARP
13_Member	GO Biological Processes	GO:0001569	branching involved in blood vessel morphogenesis	-4.14805	-2.40029	7/32	25,1906,6789,7048,8829,10672,441478	ABL1,EDN1,STK4,TGFBR2,NRP1,GNA13,NRARP
13_Member	GO Biological Processes	GO:2000027	regulation of animal organ morphogenesis	-3.86975	-2.19063	21/255	25,163,627,657,659,1906,3082,3516,4300,7046,7048,7068,8321,10252,10512,54806,54829,55366,55679,55727,57154	ABL1,AP2B1,BDNF,BMPR1A,BMPR2,EDN1,HGF,RBPJ,MLLT3,TGFBR1,TGFBR2,THRB,FZD1,SPRY1,SEMA3C,AHI1,ASPN,LGR4,LIMS2,BTBD7,SMURF1
13_Member	GO Biological Processes	GO:0061138	morphogenesis of a branching epithelium	-3.86185	-2.18774	17/183	25,1906,2294,2885,3082,5087,6789,7048,8829,10252,10413,10512,10672,55366,55727,151449,441478	ABL1,EDN1,FOXF1,GRB2,HGF,PBX1,STK4,TGFBR2,NRP1,SPRY1,YAP1,SEMA3C,GNA13,LGR4,BTBD7,GDF7,NRARP
13_Member	GO Biological Processes	GO:0001763	morphogenesis of a branching structure	-3.42894	-1.86023	17/199	25,1906,2294,2885,3082,5087,6789,7048,8829,10252,10413,10512,10672,55366,55727,151449,441478	ABL1,EDN1,FOXF1,GRB2,HGF,PBX1,STK4,TGFBR2,NRP1,SPRY1,YAP1,SEMA3C,GNA13,LGR4,BTBD7,GDF7,NRARP
13_Member	GO Biological Processes	GO:0048754	branching morphogenesis of an epithelial tube	-2.78665	-1.40152	13/151	25,1906,2294,5087,6789,7048,8829,10252,10413,10672,55366,151449,441478	ABL1,EDN1,FOXF1,PBX1,STK4,TGFBR2,NRP1,SPRY1,YAP1,GNA13,LGR4,GDF7,NRARP
14_Summary	GO Biological Processes	GO:0060322	head development	-8.70327	-5.96724	60/784	25,444,538,546,613,653,657,659,1272,1398,1454,1959,2009,2113,2334,3091,3157,3516,3799,4313,4929,5156,5530,5592,5660,5915,6497,6532,6546,6586,6594,6715,6751,7048,7477,7832,8321,8455,8516,8648,8828,8829,9201,9915,10395,23028,23284,23657,25987,26468,54510,54806,55130,55717,56934,64651,83696,114327,151449,317762,5081,6659,9334,55906	ABL1,ASPH,ATP7A,ATRX,BCR,BMP5,BMPR1A,BMPR2,CNTN1,CRK,CSNK1E,EGR2,EML1,ETS1,AFF2,HIF1A,HMGCS1,RBPJ,KIF5B,MMP2,NR4A2,PDGFRA,PPP3CA,PRKG1,PSAP,RARB,SKI,SLC6A4,SLC8A1,SLIT3,SMARCA1,SRD5A1,SSTR1,TGFBR2,WNT7B,BTG2,FZD1,ATRN,ITGA8,NCOA1,NRP2,NRP1,DCLK1,ARNT2,DLC1,KDM1A,ADGRL3,SLC7A11,TSKU,LHX6,PCDH18,AHI1,ARMC4,WDR11,CA10,CSRNP1,TRAPPC9,EFHC1,GDF7,CCDC85C,PAX7,SOX4,B4GALT5,ZC4H2
14_Member	GO Biological Processes	GO:0060322	head development	-8.70327	-5.96724	60/784	25,444,538,546,613,653,657,659,1272,1398,1454,1959,2009,2113,2334,3091,3157,3516,3799,4313,4929,5156,5530,5592,5660,5915,6497,6532,6546,6586,6594,6715,6751,7048,7477,7832,8321,8455,8516,8648,8828,8829,9201,9915,10395,23028,23284,23657,25987,26468,54510,54806,55130,55717,56934,64651,83696,114327,151449,317762	ABL1,ASPH,ATP7A,ATRX,BCR,BMP5,BMPR1A,BMPR2,CNTN1,CRK,CSNK1E,EGR2,EML1,ETS1,AFF2,HIF1A,HMGCS1,RBPJ,KIF5B,MMP2,NR4A2,PDGFRA,PPP3CA,PRKG1,PSAP,RARB,SKI,SLC6A4,SLC8A1,SLIT3,SMARCA1,SRD5A1,SSTR1,TGFBR2,WNT7B,BTG2,FZD1,ATRN,ITGA8,NCOA1,NRP2,NRP1,DCLK1,ARNT2,DLC1,KDM1A,ADGRL3,SLC7A11,TSKU,LHX6,PCDH18,AHI1,ARMC4,WDR11,CA10,CSRNP1,TRAPPC9,EFHC1,GDF7,CCDC85C
14_Member	GO Biological Processes	GO:0007420	brain development	-7.56643	-5.03008	55/741	25,538,546,613,653,657,659,1272,1398,1454,1959,2009,2113,2334,3091,3157,3516,3799,4929,5530,5592,5660,5915,6497,6532,6546,6586,6594,6715,6751,7048,7477,7832,8321,8455,8516,8648,8828,8829,9201,9915,10395,23028,23284,23657,25987,26468,54510,54806,55130,56934,83696,114327,151449,317762	ABL1,ATP7A,ATRX,BCR,BMP5,BMPR1A,BMPR2,CNTN1,CRK,CSNK1E,EGR2,EML1,ETS1,AFF2,HIF1A,HMGCS1,RBPJ,KIF5B,NR4A2,PPP3CA,PRKG1,PSAP,RARB,SKI,SLC6A4,SLC8A1,SLIT3,SMARCA1,SRD5A1,SSTR1,TGFBR2,WNT7B,BTG2,FZD1,ATRN,ITGA8,NCOA1,NRP2,NRP1,DCLK1,ARNT2,DLC1,KDM1A,ADGRL3,SLC7A11,TSKU,LHX6,PCDH18,AHI1,ARMC4,CA10,TRAPPC9,EFHC1,GDF7,CCDC85C
14_Member	GO Biological Processes	GO:0030900	forebrain development	-5.12858	-3.13033	31/389	538,546,657,1398,2113,3091,3516,3799,4929,5592,5915,6497,6546,6586,6715,6751,7477,7832,8648,8828,8829,9201,10395,23028,23657,25987,26468,83696,114327,151449,317762	ATP7A,ATRX,BMPR1A,CRK,ETS1,HIF1A,RBPJ,KIF5B,NR4A2,PRKG1,RARB,SKI,SLC8A1,SLIT3,SRD5A1,SSTR1,WNT7B,BTG2,NCOA1,NRP2,NRP1,DCLK1,DLC1,KDM1A,SLC7A11,TSKU,LHX6,TRAPPC9,EFHC1,GDF7,CCDC85C
14_Member	GO Biological Processes	GO:0021953	central nervous system neuron differentiation	-4.10476	-2.36583	18/192	538,1398,1454,4929,5081,5660,6586,6659,7832,8321,8828,8829,9201,9334,25987,26468,55906,151449	ATP7A,CRK,CSNK1E,NR4A2,PAX7,PSAP,SLIT3,SOX4,BTG2,FZD1,NRP2,NRP1,DCLK1,B4GALT5,TSKU,LHX6,ZC4H2,GDF7
14_Member	GO Biological Processes	GO:0021954	central nervous system neuron development	-4.07863	-2.34693	11/82	538,1398,4929,6586,7832,8828,8829,9201,9334,25987,26468	ATP7A,CRK,NR4A2,SLIT3,BTG2,NRP2,NRP1,DCLK1,B4GALT5,TSKU,LHX6
14_Member	GO Biological Processes	GO:0021537	telencephalon development	-2.92589	-1.50232	19/260	1398,3091,3799,5915,6497,6546,6586,6715,7832,8648,8828,8829,23028,23657,25987,26468,83696,114327,317762	CRK,HIF1A,KIF5B,RARB,SKI,SLC8A1,SLIT3,SRD5A1,BTG2,NCOA1,NRP2,NRP1,KDM1A,SLC7A11,TSKU,LHX6,TRAPPC9,EFHC1,CCDC85C
14_Member	GO Biological Processes	GO:0021987	cerebral cortex development	-2.68246	-1.32965	11/119	1398,3091,6715,8648,8828,8829,23028,26468,83696,114327,317762	CRK,HIF1A,SRD5A1,NCOA1,NRP2,NRP1,KDM1A,LHX6,TRAPPC9,EFHC1,CCDC85C
14_Member	GO Biological Processes	GO:0021543	pallium development	-2.25476	-1.00822	13/174	1398,3091,3799,6715,7832,8648,8828,8829,23028,26468,83696,114327,317762	CRK,HIF1A,KIF5B,SRD5A1,BTG2,NCOA1,NRP2,NRP1,KDM1A,LHX6,TRAPPC9,EFHC1,CCDC85C
15_Summary	GO Biological Processes	GO:0120035	regulation of plasma membrane bounded cell projection organization	-8.55669	-5.8487	56/713	25,27,207,411,538,627,653,659,688,818,857,960,1272,1398,1948,2042,2241,2281,2335,3082,3655,4974,5168,5530,5962,6845,7046,7225,8321,8507,8826,8829,9706,9779,9860,10090,10152,10512,10787,22871,23028,23061,23102,23108,23258,23433,51393,54664,55704,55754,57154,57533,57580,64764,83999,100132074,1454,5087,5915,6532,7068,8648,9043,22882,23493,55906,151449,118,1906,3091,4124,4654,5139,8111,55679,7058,232…	ABL1,ABL2,AKT1,ARSB,ATP7A,BDNF,BMP5,BMPR2,KLF5,CAMK2G,CAV1,CD44,CNTN1,CRK,EFNB2,EPHA3,FER,FKBP1B,FN1,HGF,ITGA6,OMG,ENPP2,PPP3CA,RDX,VAMP7,TGFBR1,TRPC6,FZD1,ENC1,IQGAP1,NRP1,ULK2,TBC1D5,LRIG2,UST,ABI2,SEMA3C,NCKAP1,NLGN1,KDM1A,TBC1D9B,TBC1D2B,RAP1GAP2,DENND5A,RHOQ,TRPV2,TMEM106B,CCDC88A,TMEM30A,SMURF1,TBC1D14,PREX1,CREB3L2,KREMEN1,FOXO6,CSNK1E,PBX1,RARB,SLC6A4,THRB,NCOA1,SPAG9,ZHX2,HEY2,ZC4H2,GDF7…
15_Member	GO Biological Processes	GO:0120035	regulation of plasma membrane bounded cell projection organization	-8.55669	-5.8487	56/713	25,27,207,411,538,627,653,659,688,818,857,960,1272,1398,1948,2042,2241,2281,2335,3082,3655,4974,5168,5530,5962,6845,7046,7225,8321,8507,8826,8829,9706,9779,9860,10090,10152,10512,10787,22871,23028,23061,23102,23108,23258,23433,51393,54664,55704,55754,57154,57533,57580,64764,83999,100132074	ABL1,ABL2,AKT1,ARSB,ATP7A,BDNF,BMP5,BMPR2,KLF5,CAMK2G,CAV1,CD44,CNTN1,CRK,EFNB2,EPHA3,FER,FKBP1B,FN1,HGF,ITGA6,OMG,ENPP2,PPP3CA,RDX,VAMP7,TGFBR1,TRPC6,FZD1,ENC1,IQGAP1,NRP1,ULK2,TBC1D5,LRIG2,UST,ABI2,SEMA3C,NCKAP1,NLGN1,KDM1A,TBC1D9B,TBC1D2B,RAP1GAP2,DENND5A,RHOQ,TRPV2,TMEM106B,CCDC88A,TMEM30A,SMURF1,TBC1D14,PREX1,CREB3L2,KREMEN1,FOXO6
15_Member	GO Biological Processes	GO:0031344	regulation of cell projection organization	-8.34097	-5.69602	56/723	25,27,207,411,538,627,653,659,688,818,857,960,1272,1398,1948,2042,2241,2281,2335,3082,3655,4974,5168,5530,5962,6845,7046,7225,8321,8507,8826,8829,9706,9779,9860,10090,10152,10512,10787,22871,23028,23061,23102,23108,23258,23433,51393,54664,55704,55754,57154,57533,57580,64764,83999,100132074	ABL1,ABL2,AKT1,ARSB,ATP7A,BDNF,BMP5,BMPR2,KLF5,CAMK2G,CAV1,CD44,CNTN1,CRK,EFNB2,EPHA3,FER,FKBP1B,FN1,HGF,ITGA6,OMG,ENPP2,PPP3CA,RDX,VAMP7,TGFBR1,TRPC6,FZD1,ENC1,IQGAP1,NRP1,ULK2,TBC1D5,LRIG2,UST,ABI2,SEMA3C,NCKAP1,NLGN1,KDM1A,TBC1D9B,TBC1D2B,RAP1GAP2,DENND5A,RHOQ,TRPV2,TMEM106B,CCDC88A,TMEM30A,SMURF1,TBC1D14,PREX1,CREB3L2,KREMEN1,FOXO6
15_Member	GO Biological Processes	GO:0045664	regulation of neuron differentiation	-8.29853	-5.66517	53/667	25,27,207,411,627,653,659,818,1272,1398,1454,1948,2042,2281,2335,3082,3655,4974,5087,5530,5915,6532,6845,7068,7225,8321,8507,8648,8826,8829,9043,9706,9860,10090,10152,10512,22871,22882,23028,23108,23258,23493,51393,54664,55704,55754,55906,57154,57580,64764,83999,151449,100132074	ABL1,ABL2,AKT1,ARSB,BDNF,BMP5,BMPR2,CAMK2G,CNTN1,CRK,CSNK1E,EFNB2,EPHA3,FKBP1B,FN1,HGF,ITGA6,OMG,PBX1,PPP3CA,RARB,SLC6A4,VAMP7,THRB,TRPC6,FZD1,ENC1,NCOA1,IQGAP1,NRP1,SPAG9,ULK2,LRIG2,UST,ABI2,SEMA3C,NLGN1,ZHX2,KDM1A,RAP1GAP2,DENND5A,HEY2,TRPV2,TMEM106B,CCDC88A,TMEM30A,ZC4H2,SMURF1,PREX1,CREB3L2,KREMEN1,GDF7,FOXO6
15_Member	GO Biological Processes	GO:0010975	regulation of neuron projection development	-7.07358	-4.64576	42/512	25,27,207,411,627,653,659,818,1272,1398,1948,2042,2281,2335,3082,3655,4974,5530,6845,7225,8321,8507,8826,8829,9706,9860,10090,10152,10512,22871,23028,23108,23258,51393,54664,55704,55754,57154,57580,64764,83999,100132074	ABL1,ABL2,AKT1,ARSB,BDNF,BMP5,BMPR2,CAMK2G,CNTN1,CRK,EFNB2,EPHA3,FKBP1B,FN1,HGF,ITGA6,OMG,PPP3CA,VAMP7,TRPC6,FZD1,ENC1,IQGAP1,NRP1,ULK2,LRIG2,UST,ABI2,SEMA3C,NLGN1,KDM1A,RAP1GAP2,DENND5A,TRPV2,TMEM106B,CCDC88A,TMEM30A,SMURF1,PREX1,CREB3L2,KREMEN1,FOXO6
15_Member	GO Biological Processes	GO:0010720	positive regulation of cell development	-6.28841	-3.99435	43/567	25,27,118,411,627,653,659,1272,1398,1454,1906,2042,2281,2335,3082,3091,3655,4124,4654,5139,5915,6845,7225,8111,8321,8507,8648,8826,8829,9043,10512,22871,23028,51393,54664,55679,55754,55906,57154,57580,64764,151449,100132074	ABL1,ABL2,ADD1,ARSB,BDNF,BMP5,BMPR2,CNTN1,CRK,CSNK1E,EDN1,EPHA3,FKBP1B,FN1,HGF,HIF1A,ITGA6,MAN2A1,MYOD1,PDE3A,RARB,VAMP7,TRPC6,GPR68,FZD1,ENC1,NCOA1,IQGAP1,NRP1,SPAG9,SEMA3C,NLGN1,KDM1A,TRPV2,TMEM106B,LIMS2,TMEM30A,ZC4H2,SMURF1,PREX1,CREB3L2,GDF7,FOXO6
15_Member	GO Biological Processes	GO:0045666	positive regulation of neuron differentiation	-5.33391	-3.28213	31/380	27,411,627,653,659,1272,1454,2042,2281,2335,3082,3655,5915,6845,7225,8321,8507,8648,8826,8829,9043,22871,23028,51393,54664,55754,55906,57154,64764,151449,100132074	ABL2,ARSB,BDNF,BMP5,BMPR2,CNTN1,CSNK1E,EPHA3,FKBP1B,FN1,HGF,ITGA6,RARB,VAMP7,TRPC6,FZD1,ENC1,NCOA1,IQGAP1,NRP1,SPAG9,NLGN1,KDM1A,TRPV2,TMEM106B,TMEM30A,ZC4H2,SMURF1,CREB3L2,GDF7,FOXO6
15_Member	GO Biological Processes	GO:0031346	positive regulation of cell projection organization	-4.626	-2.77647	30/393	27,411,538,627,653,659,1272,2042,2281,2335,3082,3655,5168,6845,7046,8321,8507,8826,8829,10787,22871,23028,23433,51393,54664,55704,55754,57154,64764,100132074	ABL2,ARSB,ATP7A,BDNF,BMP5,BMPR2,CNTN1,EPHA3,FKBP1B,FN1,HGF,ITGA6,ENPP2,VAMP7,TGFBR1,FZD1,ENC1,IQGAP1,NRP1,NCKAP1,NLGN1,KDM1A,RHOQ,TRPV2,TMEM106B,CCDC88A,TMEM30A,SMURF1,CREB3L2,FOXO6
15_Member	GO Biological Processes	GO:0010976	positive regulation of neuron projection development	-4.34527	-2.55701	24/291	27,411,627,653,659,1272,2042,2281,2335,3082,3655,6845,8321,8507,8826,8829,22871,23028,51393,54664,55754,57154,64764,100132074	ABL2,ARSB,BDNF,BMP5,BMPR2,CNTN1,EPHA3,FKBP1B,FN1,HGF,ITGA6,VAMP7,FZD1,ENC1,IQGAP1,NRP1,NLGN1,KDM1A,TRPV2,TMEM106B,TMEM30A,SMURF1,CREB3L2,FOXO6
15_Member	GO Biological Processes	GO:0050769	positive regulation of neurogenesis	-4.05365	-2.32623	33/484	27,411,627,653,659,1272,1454,2042,2281,2335,3082,3091,3655,4124,5915,6845,7225,8321,8507,8648,8826,8829,9043,22871,23028,51393,54664,55754,55906,57154,64764,151449,100132074	ABL2,ARSB,BDNF,BMP5,BMPR2,CNTN1,CSNK1E,EPHA3,FKBP1B,FN1,HGF,HIF1A,ITGA6,MAN2A1,RARB,VAMP7,TRPC6,FZD1,ENC1,NCOA1,IQGAP1,NRP1,SPAG9,NLGN1,KDM1A,TRPV2,TMEM106B,TMEM30A,ZC4H2,SMURF1,CREB3L2,GDF7,FOXO6
15_Member	GO Biological Processes	GO:0051962	positive regulation of nervous system development	-3.64945	-2.02614	35/552	27,411,627,653,659,1272,1454,2042,2281,2335,3082,3091,3655,4124,5915,6845,7058,7225,8321,8507,8648,8826,8829,9043,22871,23028,23284,51393,54664,55754,55906,57154,64764,151449,100132074	ABL2,ARSB,BDNF,BMP5,BMPR2,CNTN1,CSNK1E,EPHA3,FKBP1B,FN1,HGF,HIF1A,ITGA6,MAN2A1,RARB,VAMP7,THBS2,TRPC6,FZD1,ENC1,NCOA1,IQGAP1,NRP1,SPAG9,NLGN1,KDM1A,ADGRL3,TRPV2,TMEM106B,TMEM30A,ZC4H2,SMURF1,CREB3L2,GDF7,FOXO6
15_Member	GO Biological Processes	GO:0016358	dendrite development	-2.37497	-1.08939	17/249	627,653,1398,5530,5592,6845,7225,8301,8826,8829,9201,10152,22871,54664,57580,133584,100132074	BDNF,BMP5,CRK,PPP3CA,PRKG1,VAMP7,TRPC6,PICALM,IQGAP1,NRP1,DCLK1,ABI2,NLGN1,TMEM106B,PREX1,EGFLAM,FOXO6
16_Summary	GO Biological Processes	GO:0061448	connective tissue development	-8.35641	-5.69956	31/278	59,538,653,657,659,960,1432,1906,1958,2734,3091,3696,4015,4017,4060,4088,4256,5081,5915,7046,7048,7477,9451,9658,50515,55790,57561,64764,79068,91252,151449,92,2114,2697,4313,4664,5087,5125,5156,6497,6659,6715,8111,9061,10019,51360,56987,60529,64651,124565,342184	ACTA2,ATP7A,BMP5,BMPR1A,BMPR2,CD44,MAPK14,EDN1,EGR1,GLG1,HIF1A,ITGB8,LOX,LOXL2,LUM,SMAD3,MGP,PAX7,RARB,TGFBR1,TGFBR2,WNT7B,EIF2AK3,ZNF516,CHST11,CSGALNACT1,ARRDC3,CREB3L2,FTO,SLC39A13,GDF7,ACVR2A,ETS2,GJA1,MMP2,NAB1,PBX1,PCSK5,PDGFRA,SKI,SOX4,SRD5A1,GPR68,PAPSS1,SH2B3,MBTPS2,BBX,ALX4,CSRNP1,SLC38A10,FMN1
16_Member	GO Biological Processes	GO:0061448	connective tissue development	-8.35641	-5.69956	31/278	59,538,653,657,659,960,1432,1906,1958,2734,3091,3696,4015,4017,4060,4088,4256,5081,5915,7046,7048,7477,9451,9658,50515,55790,57561,64764,79068,91252,151449	ACTA2,ATP7A,BMP5,BMPR1A,BMPR2,CD44,MAPK14,EDN1,EGR1,GLG1,HIF1A,ITGB8,LOX,LOXL2,LUM,SMAD3,MGP,PAX7,RARB,TGFBR1,TGFBR2,WNT7B,EIF2AK3,ZNF516,CHST11,CSGALNACT1,ARRDC3,CREB3L2,FTO,SLC39A13,GDF7
16_Member	GO Biological Processes	GO:0001501	skeletal system development	-7.55705	-5.03008	44/529	92,538,653,657,659,960,1432,1906,2114,2697,2734,3091,3696,4015,4017,4060,4088,4256,4313,4664,5081,5087,5125,5156,5915,6497,6659,6715,7046,7048,7477,8111,9061,9451,10019,50515,51360,55790,56987,60529,64651,64764,124565,342184	ACVR2A,ATP7A,BMP5,BMPR1A,BMPR2,CD44,MAPK14,EDN1,ETS2,GJA1,GLG1,HIF1A,ITGB8,LOX,LOXL2,LUM,SMAD3,MGP,MMP2,NAB1,PAX7,PBX1,PCSK5,PDGFRA,RARB,SKI,SOX4,SRD5A1,TGFBR1,TGFBR2,WNT7B,GPR68,PAPSS1,EIF2AK3,SH2B3,CHST11,MBTPS2,CSGALNACT1,BBX,ALX4,CSRNP1,CREB3L2,SLC38A10,FMN1
16_Member	GO Biological Processes	GO:0051216	cartilage development	-6.15479	-3.89104	23/212	538,653,657,659,960,1432,1906,2734,3091,3696,4017,4060,4088,4256,5081,5915,7046,7048,7477,9451,50515,55790,64764	ATP7A,BMP5,BMPR1A,BMPR2,CD44,MAPK14,EDN1,GLG1,HIF1A,ITGB8,LOXL2,LUM,SMAD3,MGP,PAX7,RARB,TGFBR1,TGFBR2,WNT7B,EIF2AK3,CHST11,CSGALNACT1,CREB3L2
16_Member	GO Biological Processes	GO:0002062	chondrocyte differentiation	-3.0509	-1.58048	12/124	657,659,1432,2734,4017,4088,5915,7046,7048,9451,50515,64764	BMPR1A,BMPR2,MAPK14,GLG1,LOXL2,SMAD3,RARB,TGFBR1,TGFBR2,EIF2AK3,CHST11,CREB3L2
16_Member	GO Biological Processes	GO:0048705	skeletal system morphogenesis	-2.53705	-1.21432	17/240	659,1432,2734,4088,4256,4313,4664,5156,5915,6497,7046,7048,50515,55790,60529,64651,342184	BMPR2,MAPK14,GLG1,SMAD3,MGP,MMP2,NAB1,PDGFRA,RARB,SKI,TGFBR1,TGFBR2,CHST11,CSGALNACT1,ALX4,CSRNP1,FMN1
16_Member	GO Biological Processes	GO:0060348	bone development	-2.17162	-0.948367	15/219	659,2697,2734,4015,4664,5915,6497,6715,7048,8111,10019,51360,55790,56987,124565	BMPR2,GJA1,GLG1,LOX,NAB1,RARB,SKI,SRD5A1,TGFBR2,GPR68,SH2B3,MBTPS2,CSGALNACT1,BBX,SLC38A10
17_Summary	GO Biological Processes	GO:0001503	ossification	-7.89178	-5.32208	38/408	43,92,207,653,657,659,1432,1591,1959,2132,3082,3091,3486,3516,4015,4088,4256,4313,4330,4664,5087,6497,6546,7477,8321,8792,9451,9562,9902,54829,54857,55366,55790,57154,58476,79176,83999,90993,23493,2885,3716,3717,3977	ACHE,ACVR2A,AKT1,BMP5,BMPR1A,BMPR2,MAPK14,CYP24A1,EGR2,EXT2,HGF,HIF1A,IGFBP3,RBPJ,LOX,SMAD3,MGP,MMP2,MN1,NAB1,PBX1,SKI,SLC8A1,WNT7B,FZD1,TNFRSF11A,EIF2AK3,MINPP1,MRC2,ASPN,GDPD2,LGR4,CSGALNACT1,SMURF1,TP53INP2,FBXL15,KREMEN1,CREB3L1,HEY2,GRB2,JAK1,JAK2,LIFR
17_Member	GO Biological Processes	GO:0001503	ossification	-7.89178	-5.32208	38/408	43,92,207,653,657,659,1432,1591,1959,2132,3082,3091,3486,3516,4015,4088,4256,4313,4330,4664,5087,6497,6546,7477,8321,8792,9451,9562,9902,54829,54857,55366,55790,57154,58476,79176,83999,90993	ACHE,ACVR2A,AKT1,BMP5,BMPR1A,BMPR2,MAPK14,CYP24A1,EGR2,EXT2,HGF,HIF1A,IGFBP3,RBPJ,LOX,SMAD3,MGP,MMP2,MN1,NAB1,PBX1,SKI,SLC8A1,WNT7B,FZD1,TNFRSF11A,EIF2AK3,MINPP1,MRC2,ASPN,GDPD2,LGR4,CSGALNACT1,SMURF1,TP53INP2,FBXL15,KREMEN1,CREB3L1
17_Member	GO Biological Processes	GO:0030282	bone mineralization	-4.00495	-2.29629	13/113	92,657,659,3091,4015,4088,4256,6546,9451,9562,54829,55366,79176	ACVR2A,BMPR1A,BMPR2,HIF1A,LOX,SMAD3,MGP,SLC8A1,EIF2AK3,MINPP1,ASPN,LGR4,FBXL15
17_Member	GO Biological Processes	GO:0030278	regulation of ossification	-3.1851	-1.67525	17/209	92,657,659,1432,1959,3082,3091,3516,4088,4256,5087,6497,6546,7477,54857,57154,83999	ACVR2A,BMPR1A,BMPR2,MAPK14,EGR2,HGF,HIF1A,RBPJ,SMAD3,MGP,PBX1,SKI,SLC8A1,WNT7B,GDPD2,SMURF1,KREMEN1
17_Member	GO Biological Processes	GO:0001649	osteoblast differentiation	-3.14061	-1.64596	18/230	43,92,207,657,659,1591,3082,3486,4015,4088,6497,7477,8321,9902,54857,55366,58476,90993	ACHE,ACVR2A,AKT1,BMPR1A,BMPR2,CYP24A1,HGF,IGFBP3,LOX,SMAD3,SKI,WNT7B,FZD1,MRC2,GDPD2,LGR4,TP53INP2,CREB3L1
17_Member	GO Biological Processes	GO:0031214	biomineral tissue development	-3.02637	-1.56303	14/160	92,657,659,3091,4015,4088,4256,6546,9451,9562,23493,54829,55366,79176	ACVR2A,BMPR1A,BMPR2,HIF1A,LOX,SMAD3,MGP,SLC8A1,EIF2AK3,MINPP1,HEY2,ASPN,LGR4,FBXL15
17_Member	KEGG Pathway	hsa04550	Signaling pathways regulating pluripotency of stem cells	-2.62448	-1.28524	12/139	92,207,657,659,1432,2885,3716,3717,3977,4088,7477,8321	ACVR2A,AKT1,BMPR1A,BMPR2,MAPK14,GRB2,JAK1,JAK2,LIFR,SMAD3,WNT7B,FZD1
17_Member	GO Biological Processes	GO:0070167	regulation of biomineral tissue development	-2.39088	-1.10305	9/94	92,657,659,3091,4088,4256,6546,23493,54829	ACVR2A,BMPR1A,BMPR2,HIF1A,SMAD3,MGP,SLC8A1,HEY2,ASPN
17_Member	GO Biological Processes	GO:0030501	positive regulation of bone mineralization	-2.04314	-0.850359	5/39	92,657,659,4088,6546	ACVR2A,BMPR1A,BMPR2,SMAD3,SLC8A1
18_Summary	GO Biological Processes	GO:0007169	transmembrane receptor protein tyrosine kinase signaling pathway	-7.64597	-5.09558	55/737	25,163,207,613,627,653,1012,1398,1432,1609,1634,1948,2042,2241,2885,3082,3091,3416,3486,3516,3643,3685,3717,4015,4313,5156,6503,7525,8027,8036,8826,8828,8829,8895,9019,9252,9451,9860,10019,10252,10580,10787,23433,51232,54806,55614,55704,64651,64710,79801,84959,90993,114882,143686,100132074	ABL1,AP2B1,AKT1,BCR,BDNF,BMP5,CDH13,CRK,MAPK14,DGKQ,DCN,EFNB2,EPHA3,FER,GRB2,HGF,HIF1A,IDE,IGFBP3,RBPJ,INSR,ITGAV,JAK2,LOX,MMP2,PDGFRA,SLA,YES1,STAM,SHOC2,IQGAP1,NRP2,NRP1,CPNE3,MPZL1,RPS6KA5,EIF2AK3,LRIG2,SH2B3,SPRY1,SORBS1,NCKAP1,RHOQ,CRIM1,AHI1,KIF16B,CCDC88A,CSRNP1,NUCKS1,SHCBP1,UBASH3B,CREB3L1,OSBPL8,SESN3,FOXO6
18_Member	GO Biological Processes	GO:0007169	transmembrane receptor protein tyrosine kinase signaling pathway	-7.64597	-5.09558	55/737	25,163,207,613,627,653,1012,1398,1432,1609,1634,1948,2042,2241,2885,3082,3091,3416,3486,3516,3643,3685,3717,4015,4313,5156,6503,7525,8027,8036,8826,8828,8829,8895,9019,9252,9451,9860,10019,10252,10580,10787,23433,51232,54806,55614,55704,64651,64710,79801,84959,90993,114882,143686,100132074	ABL1,AP2B1,AKT1,BCR,BDNF,BMP5,CDH13,CRK,MAPK14,DGKQ,DCN,EFNB2,EPHA3,FER,GRB2,HGF,HIF1A,IDE,IGFBP3,RBPJ,INSR,ITGAV,JAK2,LOX,MMP2,PDGFRA,SLA,YES1,STAM,SHOC2,IQGAP1,NRP2,NRP1,CPNE3,MPZL1,RPS6KA5,EIF2AK3,LRIG2,SH2B3,SPRY1,SORBS1,NCKAP1,RHOQ,CRIM1,AHI1,KIF16B,CCDC88A,CSRNP1,NUCKS1,SHCBP1,UBASH3B,CREB3L1,OSBPL8,SESN3,FOXO6
18_Member	GO Biological Processes	GO:0038127	ERBB signaling pathway	-2.9469	-1.51623	13/145	25,207,1012,2241,2885,3516,8027,8826,8895,9252,10252,55614,55704	ABL1,AKT1,CDH13,FER,GRB2,RBPJ,STAM,IQGAP1,CPNE3,RPS6KA5,SPRY1,KIF16B,CCDC88A
18_Member	GO Biological Processes	GO:0007173	epidermal growth factor receptor signaling pathway	-2.59701	-1.26284	11/122	25,207,1012,2241,2885,8027,8826,9252,10252,55614,55704	ABL1,AKT1,CDH13,FER,GRB2,STAM,IQGAP1,RPS6KA5,SPRY1,KIF16B,CCDC88A
19_Summary	KEGG Pathway	hsa05166	HTLV-I infection	-7.42839	-4.92282	28/256	207,467,1026,1031,1958,1959,2005,2113,2114,2353,3554,3716,4088,4214,4215,4772,4773,4775,5156,5530,6688,7046,7048,7477,7850,8321,8829,94241,1432,2354,2885,3459,8792,23118,140885,196,3091,3717,1960,8772,64764,90993,23493,3516,1906,29995,118461,2294,6443,8516,57591,818,2775,2776,4638,4660,5294	AKT1,ATF3,CDKN1A,CDKN2C,EGR1,EGR2,ELK4,ETS1,ETS2,FOS,IL1R1,JAK1,SMAD3,MAP3K1,MAP3K3,NFATC1,NFATC2,NFATC3,PDGFRA,PPP3CA,SPI1,TGFBR1,TGFBR2,WNT7B,IL1R2,FZD1,NRP1,TP53INP1,MAPK14,FOSB,GRB2,IFNGR1,TNFRSF11A,TAB2,SIRPA,AHR,HIF1A,JAK2,EGR3,FADD,CREB3L2,CREB3L1,HEY2,RBPJ,EDN1,LMCD1,C10orf71,FOXF1,SGCB,ITGA8,MRTFA,CAMK2G,GNAO1,GNAQ,MYLK,PPP1R12B,PIK3CG
19_Member	KEGG Pathway	hsa05166	HTLV-I infection	-7.42839	-4.92282	28/256	207,467,1026,1031,1958,1959,2005,2113,2114,2353,3554,3716,4088,4214,4215,4772,4773,4775,5156,5530,6688,7046,7048,7477,7850,8321,8829,94241	AKT1,ATF3,CDKN1A,CDKN2C,EGR1,EGR2,ELK4,ETS1,ETS2,FOS,IL1R1,JAK1,SMAD3,MAP3K1,MAP3K3,NFATC1,NFATC2,NFATC3,PDGFRA,PPP3CA,SPI1,TGFBR1,TGFBR2,WNT7B,IL1R2,FZD1,NRP1,TP53INP1
19_Member	KEGG Pathway	hsa04380	Osteoclast differentiation	-5.81811	-3.64239	17/130	207,1432,2353,2354,2885,3459,3554,3716,4772,4773,5530,6688,7046,7048,8792,23118,140885	AKT1,MAPK14,FOS,FOSB,GRB2,IFNGR1,IL1R1,JAK1,NFATC1,NFATC2,PPP3CA,SPI1,TGFBR1,TGFBR2,TNFRSF11A,TAB2,SIRPA
19_Member	KEGG Pathway	hsa04659	Th17 cell differentiation	-5.58836	-3.47293	15/107	196,1432,2353,3091,3459,3554,3716,3717,4088,4772,4773,4775,5530,7046,7048	AHR,MAPK14,FOS,HIF1A,IFNGR1,IL1R1,JAK1,JAK2,SMAD3,NFATC1,NFATC2,NFATC3,PPP3CA,TGFBR1,TGFBR2
19_Member	KEGG Pathway	hsa05161	Hepatitis B	-4.60091	-2.75512	16/144	207,1026,1959,1960,2353,2885,3716,4088,4214,4772,4773,4775,7046,8772,64764,90993	AKT1,CDKN1A,EGR2,EGR3,FOS,GRB2,JAK1,SMAD3,MAP3K1,NFATC1,NFATC2,NFATC3,TGFBR1,FADD,CREB3L2,CREB3L1
19_Member	GO Biological Processes	GO:1905064	negative regulation of vascular smooth muscle cell differentiation	-3.03185	-1.56766	4/14	4772,4773,4775,23493	NFATC1,NFATC2,NFATC3,HEY2
19_Member	KEGG Pathway	hsa04658	Th1 and Th2 cell differentiation	-3.01693	-1.55866	10/92	1432,2353,3459,3516,3716,3717,4772,4773,4775,5530	MAPK14,FOS,IFNGR1,RBPJ,JAK1,JAK2,NFATC1,NFATC2,NFATC3,PPP3CA
19_Member	GO Biological Processes	GO:0048016	inositol phosphate-mediated signaling	-2.6094	-1.2719	7/56	1906,4772,4773,4775,5530,29995,118461	EDN1,NFATC1,NFATC2,NFATC3,PPP3CA,LMCD1,C10orf71
19_Member	GO Biological Processes	GO:0051145	smooth muscle cell differentiation	-2.54069	-1.2174	8/73	2294,4772,4773,4775,6443,8516,23493,57591	FOXF1,NFATC1,NFATC2,NFATC3,SGCB,ITGA8,HEY2,MRTFA
19_Member	GO Biological Processes	GO:0033173	calcineurin-NFAT signaling cascade	-2.49709	-1.18485	6/44	4772,4773,4775,5530,29995,118461	NFATC1,NFATC2,NFATC3,PPP3CA,LMCD1,C10orf71
19_Member	KEGG Pathway	hsa04921	Oxytocin signaling pathway	-2.30841	-1.04949	12/152	818,1026,2353,2775,2776,4638,4660,4772,4773,4775,5294,5530	CAMK2G,CDKN1A,FOS,GNAO1,GNAQ,MYLK,PPP1R12B,NFATC1,NFATC2,NFATC3,PIK3CG,PPP3CA
19_Member	GO Biological Processes	GO:0097720	calcineurin-mediated signaling	-2.2609	-1.01233	6/49	4772,4773,4775,5530,29995,118461	NFATC1,NFATC2,NFATC3,PPP3CA,LMCD1,C10orf71
19_Member	GO Biological Processes	GO:0051151	negative regulation of smooth muscle cell differentiation	-2.18823	-0.961856	4/23	4772,4773,4775,23493	NFATC1,NFATC2,NFATC3,HEY2
19_Member	GO Biological Processes	GO:0035886	vascular smooth muscle cell differentiation	-2.04314	-0.850359	5/39	4772,4773,4775,6443,23493	NFATC1,NFATC2,NFATC3,SGCB,HEY2
19_Member	KEGG Pathway	hsa04662	B cell receptor signaling pathway	-2.03605	-0.844918	7/71	207,2353,2885,4772,4773,4775,5530	AKT1,FOS,GRB2,NFATC1,NFATC2,NFATC3,PPP3CA
20_Summary	GO Biological Processes	GO:0032535	regulation of cellular component size	-7.25467	-4.78972	35/378	25,118,120,207,538,627,659,1182,1906,2241,2335,2764,2885,3778,5341,5962,6558,7456,7477,8301,8829,9706,9873,10152,10512,10787,23028,23038,23108,29766,51393,57403,57580,133746,342184,59,857,2149,2697,5592,6532,6546	ABL1,ADD1,ADD3,AKT1,ATP7A,BDNF,BMPR2,CLCN3,EDN1,FER,FN1,GMFB,GRB2,KCNMA1,PLEK,RDX,SLC12A2,WIPF1,WNT7B,PICALM,NRP1,ULK2,FCHSD2,ABI2,SEMA3C,NCKAP1,KDM1A,WDTC1,RAP1GAP2,TMOD3,TRPV2,RAB22A,PREX1,JMY,FMN1,ACTA2,CAV1,F2R,GJA1,PRKG1,SLC6A4,SLC8A1
20_Member	GO Biological Processes	GO:0032535	regulation of cellular component size	-7.25467	-4.78972	35/378	25,118,120,207,538,627,659,1182,1906,2241,2335,2764,2885,3778,5341,5962,6558,7456,7477,8301,8829,9706,9873,10152,10512,10787,23028,23038,23108,29766,51393,57403,57580,133746,342184	ABL1,ADD1,ADD3,AKT1,ATP7A,BDNF,BMPR2,CLCN3,EDN1,FER,FN1,GMFB,GRB2,KCNMA1,PLEK,RDX,SLC12A2,WIPF1,WNT7B,PICALM,NRP1,ULK2,FCHSD2,ABI2,SEMA3C,NCKAP1,KDM1A,WDTC1,RAP1GAP2,TMOD3,TRPV2,RAB22A,PREX1,JMY,FMN1
20_Member	GO Biological Processes	GO:0090066	regulation of anatomical structure size	-7.0036	-4.5898	42/515	25,59,118,120,207,538,627,659,857,1182,1906,2149,2241,2335,2697,2764,2885,3778,5341,5592,5962,6532,6546,6558,7456,7477,8301,8829,9706,9873,10152,10512,10787,23028,23038,23108,29766,51393,57403,57580,133746,342184	ABL1,ACTA2,ADD1,ADD3,AKT1,ATP7A,BDNF,BMPR2,CAV1,CLCN3,EDN1,F2R,FER,FN1,GJA1,GMFB,GRB2,KCNMA1,PLEK,PRKG1,RDX,SLC6A4,SLC8A1,SLC12A2,WIPF1,WNT7B,PICALM,NRP1,ULK2,FCHSD2,ABI2,SEMA3C,NCKAP1,KDM1A,WDTC1,RAP1GAP2,TMOD3,TRPV2,RAB22A,PREX1,JMY,FMN1
20_Member	GO Biological Processes	GO:0008361	regulation of cell size	-5.55804	-3.45883	20/181	25,118,207,538,627,659,1182,1906,2335,3778,5341,5962,6558,8829,9706,10512,23028,23038,23108,51393	ABL1,ADD1,AKT1,ATP7A,BDNF,BMPR2,CLCN3,EDN1,FN1,KCNMA1,PLEK,RDX,SLC12A2,NRP1,ULK2,SEMA3C,KDM1A,WDTC1,RAP1GAP2,TRPV2

## Sheet: MYOD1OE VS MYOD1NC DOWN
GroupID	Category	Term	Description	LogP	Log(q-value)	InTerm_InList	Genes	Symbols
1_Summary	GO Biological Processes	GO:0030198	extracellular matrix organization	-5.28463	-1.34714	25/373	351,1280,1284,1289,1292,1299,1308,2022,3674,3909,4241,5175,5806,6624,7040,7276,7373,8292,9507,9719,60484,63827,63894,146206,196264,947,4023	APP,COL2A1,COL4A2,COL5A1,COL6A2,COL9A3,COL17A1,ENG,ITGA2B,LAMA3,MELTF,PECAM1,PTX3,FSCN1,TGFB1,TTR,COL14A1,COLQ,ADAMTS4,ADAMTSL2,HAPLN2,BCAN,VIPAS39,CARMIL2,MPZL3,CD34,LPL
1_Member	GO Biological Processes	GO:0030198	extracellular matrix organization	-5.28463	-1.34714	25/373	351,1280,1284,1289,1292,1299,1308,2022,3674,3909,4241,5175,5806,6624,7040,7276,7373,8292,9507,9719,60484,63827,63894,146206,196264	APP,COL2A1,COL4A2,COL5A1,COL6A2,COL9A3,COL17A1,ENG,ITGA2B,LAMA3,MELTF,PECAM1,PTX3,FSCN1,TGFB1,TTR,COL14A1,COLQ,ADAMTS4,ADAMTSL2,HAPLN2,BCAN,VIPAS39,CARMIL2,MPZL3
1_Member	GO Biological Processes	GO:0043062	extracellular structure organization	-5.15299	-1.34714	27/429	351,947,1280,1284,1289,1292,1299,1308,2022,3674,3909,4023,4241,5175,5806,6624,7040,7276,7373,8292,9507,9719,60484,63827,63894,146206,196264	APP,CD34,COL2A1,COL4A2,COL5A1,COL6A2,COL9A3,COL17A1,ENG,ITGA2B,LAMA3,LPL,MELTF,PECAM1,PTX3,FSCN1,TGFB1,TTR,COL14A1,COLQ,ADAMTS4,ADAMTSL2,HAPLN2,BCAN,VIPAS39,CARMIL2,MPZL3
2_Summary	GO Biological Processes	GO:0009144	purine nucleoside triphosphate metabolic process	-4.93412	-1.34714	23/342	351,3101,4338,4508,4509,4513,4514,4519,4521,4535,4537,4538,4539,4540,4541,4706,5213,6521,7040,8473,53632,387712,400916,114,316,3158,7276,10654,79849,80221,136332,391365,109703458,7378,80308,125061,1606,2185,2224,8395,8399,9108,9971,23236,55163,84812,201164,847,4835,80183,672,3553,4023,5947,9104,63827,85414,114881,5092,1573,2693,3034,54363,131669,144193,158833	APP,HK3,MOCS2,ATP6,ATP8,COX2,COX3,CYTB,NUDT1,ND1,ND3,ND4,ND4L,ND5,ND6,NDUFAB1,PFKM,SLC4A1,TGFB1,OGT,PRKAG3,ENO4,CHCHD10,ADCY8,AOX1,HMGCS2,TTR,PMVK,PDZD3,ACSF2,LRGUK,SULT6B1,HTD2,UPP1,FLAD1,AFMID,DGKA,PTK2B,FDPS,PIP5K1B,PLA2G10,MTMR7,NR1H4,PLCB1,PNPO,PLCD4,PLD6,CAT,NQO2,RUBCNL,BRCA1,IL1B,LPL,RBP1,RGN,BCAN,SLC45A3,OSBPL7,PCBD1,CYP2J2,GHSR,HAL,HAO1,UROC1,AMDHD1,AWAT1
2_Member	GO Biological Processes	GO:0009144	purine nucleoside triphosphate metabolic process	-4.93412	-1.34714	23/342	351,3101,4338,4508,4509,4513,4514,4519,4521,4535,4537,4538,4539,4540,4541,4706,5213,6521,7040,8473,53632,387712,400916	APP,HK3,MOCS2,ATP6,ATP8,COX2,COX3,CYTB,NUDT1,ND1,ND3,ND4,ND4L,ND5,ND6,NDUFAB1,PFKM,SLC4A1,TGFB1,OGT,PRKAG3,ENO4,CHCHD10
2_Member	GO Biological Processes	GO:0072521	purine-containing compound metabolic process	-4.73039	-1.34714	33/613	114,316,351,3101,3158,4338,4508,4509,4513,4514,4519,4521,4535,4537,4538,4539,4540,4541,4706,5213,6521,7040,7276,8473,10654,53632,79849,80221,136332,387712,391365,400916,109703458	ADCY8,AOX1,APP,HK3,HMGCS2,MOCS2,ATP6,ATP8,COX2,COX3,CYTB,NUDT1,ND1,ND3,ND4,ND4L,ND5,ND6,NDUFAB1,PFKM,SLC4A1,TGFB1,TTR,OGT,PMVK,PRKAG3,PDZD3,ACSF2,LRGUK,ENO4,SULT6B1,CHCHD10,HTD2
2_Member	GO Biological Processes	GO:0046034	ATP metabolic process	-4.68788	-1.34714	21/306	351,3101,4508,4509,4513,4514,4519,4535,4537,4538,4539,4540,4541,4706,5213,6521,7040,8473,53632,387712,400916	APP,HK3,ATP6,ATP8,COX2,COX3,CYTB,ND1,ND3,ND4,ND4L,ND5,ND6,NDUFAB1,PFKM,SLC4A1,TGFB1,OGT,PRKAG3,ENO4,CHCHD10
2_Member	GO Biological Processes	GO:0009161	ribonucleoside monophosphate metabolic process	-4.65664	-1.34714	23/356	351,3101,4508,4509,4513,4514,4519,4535,4537,4538,4539,4540,4541,4706,5213,6521,7040,7378,8473,53632,136332,387712,400916	APP,HK3,ATP6,ATP8,COX2,COX3,CYTB,ND1,ND3,ND4,ND4L,ND5,ND6,NDUFAB1,PFKM,SLC4A1,TGFB1,UPP1,OGT,PRKAG3,LRGUK,ENO4,CHCHD10
2_Member	GO Biological Processes	GO:0009205	purine ribonucleoside triphosphate metabolic process	-4.58794	-1.34714	22/335	351,3101,4338,4508,4509,4513,4514,4519,4535,4537,4538,4539,4540,4541,4706,5213,6521,7040,8473,53632,387712,400916	APP,HK3,MOCS2,ATP6,ATP8,COX2,COX3,CYTB,ND1,ND3,ND4,ND4L,ND5,ND6,NDUFAB1,PFKM,SLC4A1,TGFB1,OGT,PRKAG3,ENO4,CHCHD10
2_Member	GO Biological Processes	GO:0009141	nucleoside triphosphate metabolic process	-4.54281	-1.34714	23/362	351,3101,4338,4508,4509,4513,4514,4519,4521,4535,4537,4538,4539,4540,4541,4706,5213,6521,7040,8473,53632,387712,400916	APP,HK3,MOCS2,ATP6,ATP8,COX2,COX3,CYTB,NUDT1,ND1,ND3,ND4,ND4L,ND5,ND6,NDUFAB1,PFKM,SLC4A1,TGFB1,OGT,PRKAG3,ENO4,CHCHD10
2_Member	GO Biological Processes	GO:0009199	ribonucleoside triphosphate metabolic process	-4.47121	-1.34714	22/341	351,3101,4338,4508,4509,4513,4514,4519,4535,4537,4538,4539,4540,4541,4706,5213,6521,7040,8473,53632,387712,400916	APP,HK3,MOCS2,ATP6,ATP8,COX2,COX3,CYTB,ND1,ND3,ND4,ND4L,ND5,ND6,NDUFAB1,PFKM,SLC4A1,TGFB1,OGT,PRKAG3,ENO4,CHCHD10
2_Member	GO Biological Processes	GO:0006163	purine nucleotide metabolic process	-4.4626	-1.34714	31/577	114,351,3101,3158,4338,4508,4509,4513,4514,4519,4521,4535,4537,4538,4539,4540,4541,4706,5213,6521,7040,8473,10654,53632,79849,80221,136332,387712,391365,400916,109703458	ADCY8,APP,HK3,HMGCS2,MOCS2,ATP6,ATP8,COX2,COX3,CYTB,NUDT1,ND1,ND3,ND4,ND4L,ND5,ND6,NDUFAB1,PFKM,SLC4A1,TGFB1,OGT,PMVK,PRKAG3,PDZD3,ACSF2,LRGUK,ENO4,SULT6B1,CHCHD10,HTD2
2_Member	GO Biological Processes	GO:0009167	purine ribonucleoside monophosphate metabolic process	-4.45207	-1.34714	22/342	351,3101,4508,4509,4513,4514,4519,4535,4537,4538,4539,4540,4541,4706,5213,6521,7040,8473,53632,136332,387712,400916	APP,HK3,ATP6,ATP8,COX2,COX3,CYTB,ND1,ND3,ND4,ND4L,ND5,ND6,NDUFAB1,PFKM,SLC4A1,TGFB1,OGT,PRKAG3,LRGUK,ENO4,CHCHD10
2_Member	GO Biological Processes	GO:0009126	purine nucleoside monophosphate metabolic process	-4.43301	-1.34714	22/343	351,3101,4508,4509,4513,4514,4519,4535,4537,4538,4539,4540,4541,4706,5213,6521,7040,8473,53632,136332,387712,400916	APP,HK3,ATP6,ATP8,COX2,COX3,CYTB,ND1,ND3,ND4,ND4L,ND5,ND6,NDUFAB1,PFKM,SLC4A1,TGFB1,OGT,PRKAG3,LRGUK,ENO4,CHCHD10
2_Member	GO Biological Processes	GO:0009259	ribonucleotide metabolic process	-4.34297	-1.33527	30/558	114,351,3101,3158,4338,4508,4509,4513,4514,4519,4535,4537,4538,4539,4540,4541,4706,5213,6521,7040,7378,8473,10654,53632,80221,136332,387712,391365,400916,109703458	ADCY8,APP,HK3,HMGCS2,MOCS2,ATP6,ATP8,COX2,COX3,CYTB,ND1,ND3,ND4,ND4L,ND5,ND6,NDUFAB1,PFKM,SLC4A1,TGFB1,UPP1,OGT,PMVK,PRKAG3,ACSF2,LRGUK,ENO4,SULT6B1,CHCHD10,HTD2
2_Member	GO Biological Processes	GO:0009123	nucleoside monophosphate metabolic process	-4.27077	-1.33527	23/377	351,3101,4508,4509,4513,4514,4519,4535,4537,4538,4539,4540,4541,4706,5213,6521,7040,7378,8473,53632,136332,387712,400916	APP,HK3,ATP6,ATP8,COX2,COX3,CYTB,ND1,ND3,ND4,ND4L,ND5,ND6,NDUFAB1,PFKM,SLC4A1,TGFB1,UPP1,OGT,PRKAG3,LRGUK,ENO4,CHCHD10
2_Member	GO Biological Processes	GO:0009150	purine ribonucleotide metabolic process	-4.16691	-1.26813	29/543	114,351,3101,3158,4338,4508,4509,4513,4514,4519,4535,4537,4538,4539,4540,4541,4706,5213,6521,7040,8473,10654,53632,80221,136332,387712,391365,400916,109703458	ADCY8,APP,HK3,HMGCS2,MOCS2,ATP6,ATP8,COX2,COX3,CYTB,ND1,ND3,ND4,ND4L,ND5,ND6,NDUFAB1,PFKM,SLC4A1,TGFB1,OGT,PMVK,PRKAG3,ACSF2,LRGUK,ENO4,SULT6B1,CHCHD10,HTD2
2_Member	GO Biological Processes	GO:0019693	ribose phosphate metabolic process	-4.06775	-1.19016	30/578	114,351,3101,3158,4338,4508,4509,4513,4514,4519,4535,4537,4538,4539,4540,4541,4706,5213,6521,7040,7378,8473,10654,53632,80221,136332,387712,391365,400916,109703458	ADCY8,APP,HK3,HMGCS2,MOCS2,ATP6,ATP8,COX2,COX3,CYTB,ND1,ND3,ND4,ND4L,ND5,ND6,NDUFAB1,PFKM,SLC4A1,TGFB1,UPP1,OGT,PMVK,PRKAG3,ACSF2,LRGUK,ENO4,SULT6B1,CHCHD10,HTD2
2_Member	GO Biological Processes	GO:0009117	nucleotide metabolic process	-3.85254	-1.11513	34/710	114,351,3101,3158,4338,4508,4509,4513,4514,4519,4521,4535,4537,4538,4539,4540,4541,4706,5213,6521,7040,7378,8473,10654,53632,79849,80221,80308,125061,136332,387712,391365,400916,109703458	ADCY8,APP,HK3,HMGCS2,MOCS2,ATP6,ATP8,COX2,COX3,CYTB,NUDT1,ND1,ND3,ND4,ND4L,ND5,ND6,NDUFAB1,PFKM,SLC4A1,TGFB1,UPP1,OGT,PMVK,PRKAG3,PDZD3,ACSF2,FLAD1,AFMID,LRGUK,ENO4,SULT6B1,CHCHD10,HTD2
2_Member	GO Biological Processes	GO:0006753	nucleoside phosphate metabolic process	-3.7728	-1.05011	34/717	114,351,3101,3158,4338,4508,4509,4513,4514,4519,4521,4535,4537,4538,4539,4540,4541,4706,5213,6521,7040,7378,8473,10654,53632,79849,80221,80308,125061,136332,387712,391365,400916,109703458	ADCY8,APP,HK3,HMGCS2,MOCS2,ATP6,ATP8,COX2,COX3,CYTB,NUDT1,ND1,ND3,ND4,ND4L,ND5,ND6,NDUFAB1,PFKM,SLC4A1,TGFB1,UPP1,OGT,PMVK,PRKAG3,PDZD3,ACSF2,FLAD1,AFMID,LRGUK,ENO4,SULT6B1,CHCHD10,HTD2
2_Member	GO Biological Processes	GO:0090407	organophosphate biosynthetic process	-3.00053	-0.703812	31/700	114,351,1606,2185,2224,3101,3158,4338,4508,4509,4513,5213,6521,7040,7378,8395,8399,8473,9108,9971,10654,23236,53632,55163,79849,80308,84812,125061,201164,387712,109703458	ADCY8,APP,DGKA,PTK2B,FDPS,HK3,HMGCS2,MOCS2,ATP6,ATP8,COX2,PFKM,SLC4A1,TGFB1,UPP1,PIP5K1B,PLA2G10,OGT,MTMR7,NR1H4,PMVK,PLCB1,PRKAG3,PNPO,PDZD3,FLAD1,PLCD4,AFMID,PLD6,ENO4,HTD2
2_Member	GO Biological Processes	GO:0006091	generation of precursor metabolites and energy	-2.98429	-0.69512	25/522	316,351,847,3101,3158,4508,4509,4513,4514,4519,4535,4537,4538,4539,4540,4541,4706,4835,5213,6521,8473,53632,80183,387712,400916	AOX1,APP,CAT,HK3,HMGCS2,ATP6,ATP8,COX2,COX3,CYTB,ND1,ND3,ND4,ND4L,ND5,ND6,NDUFAB1,NQO2,PFKM,SLC4A1,OGT,PRKAG3,RUBCNL,ENO4,CHCHD10
2_Member	GO Biological Processes	GO:0006754	ATP biosynthetic process	-2.73511	-0.595997	11/160	351,3101,4508,4509,4513,5213,6521,7040,8473,53632,387712	APP,HK3,ATP6,ATP8,COX2,PFKM,SLC4A1,TGFB1,OGT,PRKAG3,ENO4
2_Member	GO Biological Processes	GO:0009206	purine ribonucleoside triphosphate biosynthetic process	-2.51	-0.468924	11/171	351,3101,4508,4509,4513,5213,6521,7040,8473,53632,387712	APP,HK3,ATP6,ATP8,COX2,PFKM,SLC4A1,TGFB1,OGT,PRKAG3,ENO4
2_Member	GO Biological Processes	GO:0009156	ribonucleoside monophosphate biosynthetic process	-2.49469	-0.468924	12/197	351,3101,4508,4509,4513,5213,6521,7040,7378,8473,53632,387712	APP,HK3,ATP6,ATP8,COX2,PFKM,SLC4A1,TGFB1,UPP1,OGT,PRKAG3,ENO4
2_Member	GO Biological Processes	GO:0009145	purine nucleoside triphosphate biosynthetic process	-2.4906	-0.468924	11/172	351,3101,4508,4509,4513,5213,6521,7040,8473,53632,387712	APP,HK3,ATP6,ATP8,COX2,PFKM,SLC4A1,TGFB1,OGT,PRKAG3,ENO4
2_Member	GO Biological Processes	GO:0009201	ribonucleoside triphosphate biosynthetic process	-2.39614	-0.431381	11/177	351,3101,4508,4509,4513,5213,6521,7040,8473,53632,387712	APP,HK3,ATP6,ATP8,COX2,PFKM,SLC4A1,TGFB1,OGT,PRKAG3,ENO4
2_Member	GO Biological Processes	GO:0072330	monocarboxylic acid biosynthetic process	-2.37599	-0.431381	17/341	351,672,3101,3553,4023,4706,5213,5947,6521,8473,9104,9971,53632,63827,85414,114881,387712	APP,BRCA1,HK3,IL1B,LPL,NDUFAB1,PFKM,RBP1,SLC4A1,OGT,RGN,NR1H4,PRKAG3,BCAN,SLC45A3,OSBPL7,ENO4
2_Member	GO Biological Processes	GO:0009108	coenzyme biosynthetic process	-2.33442	-0.417473	14/260	351,3101,4338,5092,5213,6521,8473,9104,53632,55163,80308,125061,387712,109703458	APP,HK3,MOCS2,PCBD1,PFKM,SLC4A1,OGT,RGN,PRKAG3,PNPO,FLAD1,AFMID,ENO4,HTD2
2_Member	GO Biological Processes	GO:0009124	nucleoside monophosphate biosynthetic process	-2.30642	-0.417473	12/208	351,3101,4508,4509,4513,5213,6521,7040,7378,8473,53632,387712	APP,HK3,ATP6,ATP8,COX2,PFKM,SLC4A1,TGFB1,UPP1,OGT,PRKAG3,ENO4
2_Member	GO Biological Processes	GO:0032787	monocarboxylic acid metabolic process	-2.30124	-0.417473	27/651	351,672,1573,2693,3034,3101,3553,4023,4706,5213,5947,6521,8399,8473,9104,9971,53632,54363,63827,80221,85414,114881,131669,144193,158833,387712,109703458	APP,BRCA1,CYP2J2,GHSR,HAL,HK3,IL1B,LPL,NDUFAB1,PFKM,RBP1,SLC4A1,PLA2G10,OGT,RGN,NR1H4,PRKAG3,HAO1,BCAN,ACSF2,SLC45A3,OSBPL7,UROC1,AMDHD1,AWAT1,ENO4,HTD2
2_Member	GO Biological Processes	GO:0009127	purine nucleoside monophosphate biosynthetic process	-2.28803	-0.417473	11/183	351,3101,4508,4509,4513,5213,6521,7040,8473,53632,387712	APP,HK3,ATP6,ATP8,COX2,PFKM,SLC4A1,TGFB1,OGT,PRKAG3,ENO4
2_Member	GO Biological Processes	GO:0009168	purine ribonucleoside monophosphate biosynthetic process	-2.28803	-0.417473	11/183	351,3101,4508,4509,4513,5213,6521,7040,8473,53632,387712	APP,HK3,ATP6,ATP8,COX2,PFKM,SLC4A1,TGFB1,OGT,PRKAG3,ENO4
2_Member	GO Biological Processes	GO:0009142	nucleoside triphosphate biosynthetic process	-2.20205	-0.384258	11/188	351,3101,4508,4509,4513,5213,6521,7040,8473,53632,387712	APP,HK3,ATP6,ATP8,COX2,PFKM,SLC4A1,TGFB1,OGT,PRKAG3,ENO4
3_Summary	GO Biological Processes	GO:0000904	cell morphogenesis involved in differentiation	-4.69058	-1.34714	38/756	351,816,1020,1292,1627,2637,2736,2817,3199,3326,3798,4070,4137,4241,4352,4825,5175,5909,6281,6585,7373,8399,8997,9048,10461,10500,11061,11178,23218,54942,55079,57010,57111,57556,79983,89884,91624,128434,652,727,796,2185,2207,3553,3570,5919,6351,7040,7226,7857,51554,57449,196527,6857,53335,59284,80207,81892,84623,123904,55083,5064,5357,6624,54825,55329,79574,79734,84816,91752,124925,146206,150696,…	APP,CAMK2B,CDK5,COL6A2,DBN1,GBX2,GLI2,GPC1,HOXA2,HSP90AB1,KIF5A,TACSTD2,MAPT,MELTF,MPL,NKX6-1,PECAM1,RAP1GAP,S100A10,SLIT1,COL14A1,PLA2G10,KALRN,ARTN,MERTK,SEMA6C,CNMD,LZTS1,NBEAL2,ABITRAM,FEZF2,CABP4,RAB25,SEMA6A,POF1B,LHX4,NEXN,VSTM2L,BMP4,C5,CALCA,PTK2B,FCER1G,IL1B,IL6R,RARRES2,CCL4,TGFB1,TRPM2,SCG2,ACKR4,PLEKHG5,ANO6,SYT1,BCL11A,CACNG7,OPA3,SLIRP,KIRREL3,NRN1L,KIF26B,PALM,PLS1,FSCN1,CDHR2,MNS…
3_Member	GO Biological Processes	GO:0000904	cell morphogenesis involved in differentiation	-4.69058	-1.34714	38/756	351,816,1020,1292,1627,2637,2736,2817,3199,3326,3798,4070,4137,4241,4352,4825,5175,5909,6281,6585,7373,8399,8997,9048,10461,10500,11061,11178,23218,54942,55079,57010,57111,57556,79983,89884,91624,128434	APP,CAMK2B,CDK5,COL6A2,DBN1,GBX2,GLI2,GPC1,HOXA2,HSP90AB1,KIF5A,TACSTD2,MAPT,MELTF,MPL,NKX6-1,PECAM1,RAP1GAP,S100A10,SLIT1,COL14A1,PLA2G10,KALRN,ARTN,MERTK,SEMA6C,CNMD,LZTS1,NBEAL2,ABITRAM,FEZF2,CABP4,RAB25,SEMA6A,POF1B,LHX4,NEXN,VSTM2L
3_Member	GO Biological Processes	GO:0006935	chemotaxis	-3.8869	-1.11513	32/649	351,652,727,796,1020,2185,2207,2637,2736,2817,3199,3553,3570,3798,5909,5919,6351,6585,7040,7226,7857,8399,9048,10500,51554,55079,57449,57556,89884,91624,128434,196527	APP,BMP4,C5,CALCA,CDK5,PTK2B,FCER1G,GBX2,GLI2,GPC1,HOXA2,IL1B,IL6R,KIF5A,RAP1GAP,RARRES2,CCL4,SLIT1,TGFB1,TRPM2,SCG2,PLA2G10,ARTN,SEMA6C,ACKR4,FEZF2,PLEKHG5,SEMA6A,LHX4,NEXN,VSTM2L,ANO6
3_Member	GO Biological Processes	GO:0042330	taxis	-3.86267	-1.11513	32/651	351,652,727,796,1020,2185,2207,2637,2736,2817,3199,3553,3570,3798,5909,5919,6351,6585,7040,7226,7857,8399,9048,10500,51554,55079,57449,57556,89884,91624,128434,196527	APP,BMP4,C5,CALCA,CDK5,PTK2B,FCER1G,GBX2,GLI2,GPC1,HOXA2,IL1B,IL6R,KIF5A,RAP1GAP,RARRES2,CCL4,SLIT1,TGFB1,TRPM2,SCG2,PLA2G10,ARTN,SEMA6C,ACKR4,FEZF2,PLEKHG5,SEMA6A,LHX4,NEXN,VSTM2L,ANO6
3_Member	GO Biological Processes	GO:0032990	cell part morphogenesis	-3.35202	-0.790305	32/696	351,816,1020,1627,2637,2736,2817,3199,3326,3798,4137,4825,5909,6585,6857,8399,8997,9048,10500,11178,53335,54942,55079,57556,59284,80207,81892,84623,89884,91624,123904,128434	APP,CAMK2B,CDK5,DBN1,GBX2,GLI2,GPC1,HOXA2,HSP90AB1,KIF5A,MAPT,NKX6-1,RAP1GAP,SLIT1,SYT1,PLA2G10,KALRN,ARTN,SEMA6C,LZTS1,BCL11A,ABITRAM,FEZF2,SEMA6A,CACNG7,OPA3,SLIRP,KIRREL3,LHX4,NEXN,NRN1L,VSTM2L
3_Member	GO Biological Processes	GO:0007411	axon guidance	-3.28645	-0.790305	17/280	351,1020,2637,2736,2817,3199,3798,5909,6585,8399,9048,10500,55079,57556,89884,91624,128434	APP,CDK5,GBX2,GLI2,GPC1,HOXA2,KIF5A,RAP1GAP,SLIT1,PLA2G10,ARTN,SEMA6C,FEZF2,SEMA6A,LHX4,NEXN,VSTM2L
3_Member	GO Biological Processes	GO:0097485	neuron projection guidance	-3.25154	-0.790305	17/282	351,1020,2637,2736,2817,3199,3798,5909,6585,8399,9048,10500,55079,57556,89884,91624,128434	APP,CDK5,GBX2,GLI2,GPC1,HOXA2,KIF5A,RAP1GAP,SLIT1,PLA2G10,ARTN,SEMA6C,FEZF2,SEMA6A,LHX4,NEXN,VSTM2L
3_Member	GO Biological Processes	GO:0060560	developmental growth involved in morphogenesis	-3.18769	-0.766027	15/235	351,652,1020,1627,3326,4137,4825,6585,6857,10500,53335,55083,57556,59284,123904	APP,BMP4,CDK5,DBN1,HSP90AB1,MAPT,NKX6-1,SLIT1,SYT1,SEMA6C,BCL11A,KIF26B,SEMA6A,CACNG7,NRN1L
3_Member	GO Biological Processes	GO:0048812	neuron projection morphogenesis	-3.11967	-0.752373	30/658	351,816,1020,1627,2637,2736,2817,3199,3326,3798,4137,4825,5909,6585,6857,8399,8997,9048,10500,11178,53335,54942,55079,57556,59284,84623,89884,91624,123904,128434	APP,CAMK2B,CDK5,DBN1,GBX2,GLI2,GPC1,HOXA2,HSP90AB1,KIF5A,MAPT,NKX6-1,RAP1GAP,SLIT1,SYT1,PLA2G10,KALRN,ARTN,SEMA6C,LZTS1,BCL11A,ABITRAM,FEZF2,SEMA6A,CACNG7,KIRREL3,LHX4,NEXN,NRN1L,VSTM2L
3_Member	GO Biological Processes	GO:0031344	regulation of cell projection organization	-3.07515	-0.720438	32/723	816,1020,1627,2185,4070,4137,4825,5064,5357,5909,6624,6857,7226,8997,10500,11178,53335,54825,54942,55079,55329,57556,59284,79574,79734,84816,91752,124925,146206,150696,158297,285016	CAMK2B,CDK5,DBN1,PTK2B,TACSTD2,MAPT,NKX6-1,PALM,PLS1,RAP1GAP,FSCN1,SYT1,TRPM2,KALRN,SEMA6C,LZTS1,BCL11A,CDHR2,ABITRAM,FEZF2,MNS1,SEMA6A,CACNG7,EPS8L3,KCTD17,RTN4IP1,ZNF804A,SEZ6,CARMIL2,PROM2,SAXO1,ALKAL2
3_Member	GO Biological Processes	GO:0048638	regulation of developmental growth	-3.01253	-0.709132	19/350	351,652,1020,1627,2688,2693,3142,3574,3776,4137,4825,5357,6857,8292,10500,23236,53335,57556,59284	APP,BMP4,CDK5,DBN1,GH1,GHSR,HLX,IL7,KCNK2,MAPT,NKX6-1,PLS1,SYT1,COLQ,SEMA6C,PLCB1,BCL11A,SEMA6A,CACNG7
3_Member	GO Biological Processes	GO:1990138	neuron projection extension	-3.01131	-0.709132	12/171	1020,1627,3326,4137,4825,6585,6857,10500,53335,57556,59284,123904	CDK5,DBN1,HSP90AB1,MAPT,NKX6-1,SLIT1,SYT1,SEMA6C,BCL11A,SEMA6A,CACNG7,NRN1L
3_Member	GO Biological Processes	GO:0120039	plasma membrane bounded cell projection morphogenesis	-2.97585	-0.69512	30/672	351,816,1020,1627,2637,2736,2817,3199,3326,3798,4137,4825,5909,6585,6857,8399,8997,9048,10500,11178,53335,54942,55079,57556,59284,84623,89884,91624,123904,128434	APP,CAMK2B,CDK5,DBN1,GBX2,GLI2,GPC1,HOXA2,HSP90AB1,KIF5A,MAPT,NKX6-1,RAP1GAP,SLIT1,SYT1,PLA2G10,KALRN,ARTN,SEMA6C,LZTS1,BCL11A,ABITRAM,FEZF2,SEMA6A,CACNG7,KIRREL3,LHX4,NEXN,NRN1L,VSTM2L
3_Member	GO Biological Processes	GO:0048858	cell projection morphogenesis	-2.93585	-0.675554	30/676	351,816,1020,1627,2637,2736,2817,3199,3326,3798,4137,4825,5909,6585,6857,8399,8997,9048,10500,11178,53335,54942,55079,57556,59284,84623,89884,91624,123904,128434	APP,CAMK2B,CDK5,DBN1,GBX2,GLI2,GPC1,HOXA2,HSP90AB1,KIF5A,MAPT,NKX6-1,RAP1GAP,SLIT1,SYT1,PLA2G10,KALRN,ARTN,SEMA6C,LZTS1,BCL11A,ABITRAM,FEZF2,SEMA6A,CACNG7,KIRREL3,LHX4,NEXN,NRN1L,VSTM2L
3_Member	GO Biological Processes	GO:0048589	developmental growth	-2.89631	-0.661212	30/680	351,652,1020,1292,1627,2688,2693,2736,3142,3326,3574,3776,4137,4618,4825,5357,5806,6585,6857,7373,8292,9837,10500,23236,53335,55083,57556,59284,90780,123904	APP,BMP4,CDK5,COL6A2,DBN1,GH1,GHSR,GLI2,HLX,HSP90AB1,IL7,KCNK2,MAPT,MYF6,NKX6-1,PLS1,PTX3,SLIT1,SYT1,COL14A1,COLQ,GINS1,SEMA6C,PLCB1,BCL11A,KIF26B,SEMA6A,CACNG7,PYGO2,NRN1L
3_Member	GO Biological Processes	GO:0120035	regulation of plasma membrane bounded cell projection organization	-2.8743	-0.656761	31/713	816,1020,1627,2185,4070,4137,4825,5064,5357,5909,6624,6857,7226,8997,10500,11178,53335,54825,54942,55079,55329,57556,59284,79574,79734,84816,91752,124925,146206,158297,285016	CAMK2B,CDK5,DBN1,PTK2B,TACSTD2,MAPT,NKX6-1,PALM,PLS1,RAP1GAP,FSCN1,SYT1,TRPM2,KALRN,SEMA6C,LZTS1,BCL11A,CDHR2,ABITRAM,FEZF2,MNS1,SEMA6A,CACNG7,EPS8L3,KCTD17,RTN4IP1,ZNF804A,SEZ6,CARMIL2,SAXO1,ALKAL2
3_Member	GO Biological Processes	GO:0048667	cell morphogenesis involved in neuron differentiation	-2.49986	-0.468924	26/598	351,816,1020,1627,2637,2736,2817,3199,3326,3798,4137,4825,5909,6585,8399,8997,9048,10500,11178,54942,55079,57010,57556,89884,91624,128434	APP,CAMK2B,CDK5,DBN1,GBX2,GLI2,GPC1,HOXA2,HSP90AB1,KIF5A,MAPT,NKX6-1,RAP1GAP,SLIT1,PLA2G10,KALRN,ARTN,SEMA6C,LZTS1,ABITRAM,FEZF2,CABP4,SEMA6A,LHX4,NEXN,VSTM2L
3_Member	GO Biological Processes	GO:0048588	developmental cell growth	-2.28636	-0.417473	13/236	351,1020,1627,3326,4137,4825,6585,6857,10500,53335,57556,59284,123904	APP,CDK5,DBN1,HSP90AB1,MAPT,NKX6-1,SLIT1,SYT1,SEMA6C,BCL11A,SEMA6A,CACNG7,NRN1L
3_Member	GO Biological Processes	GO:0040008	regulation of growth	-2.27364	-0.416252	28/686	351,604,652,1020,1627,2185,2688,2693,3142,3488,3490,3574,3776,3872,4137,4241,4825,5357,6857,7040,8292,10500,23236,53335,54825,57556,59284,80207	APP,BCL6,BMP4,CDK5,DBN1,PTK2B,GH1,GHSR,HLX,IGFBP5,IGFBP7,IL7,KCNK2,KRT17,MAPT,MELTF,NKX6-1,PLS1,SYT1,TGFB1,COLQ,SEMA6C,PLCB1,BCL11A,CDHR2,SEMA6A,CACNG7,OPA3
3_Member	GO Biological Processes	GO:0007409	axonogenesis	-2.17211	-0.366662	21/478	351,1020,1627,2637,2736,2817,3199,3326,3798,4137,4825,5909,6585,8399,9048,10500,55079,57556,89884,91624,128434	APP,CDK5,DBN1,GBX2,GLI2,GPC1,HOXA2,HSP90AB1,KIF5A,MAPT,NKX6-1,RAP1GAP,SLIT1,PLA2G10,ARTN,SEMA6C,FEZF2,SEMA6A,LHX4,NEXN,VSTM2L
3_Member	GO Biological Processes	GO:0045664	regulation of neuron differentiation	-2.16586	-0.363995	27/667	351,604,652,816,1020,1627,2185,2736,3199,4137,4825,6457,6857,8997,10500,11178,23462,53335,54897,55079,57556,59284,84816,85458,91752,124925,285016	APP,BCL6,BMP4,CAMK2B,CDK5,DBN1,PTK2B,GLI2,HOXA2,MAPT,NKX6-1,SH3GL3,SYT1,KALRN,SEMA6C,LZTS1,HEY1,BCL11A,CASZ1,FEZF2,SEMA6A,CACNG7,RTN4IP1,DIXDC1,ZNF804A,SEZ6,ALKAL2
3_Member	GO Biological Processes	GO:0016049	cell growth	-2.05636	-0.322482	21/490	351,604,1020,1627,2185,3326,3488,3490,3872,4137,4241,4825,6585,6857,7040,10500,53335,54825,57556,59284,123904	APP,BCL6,CDK5,DBN1,PTK2B,HSP90AB1,IGFBP5,IGFBP7,KRT17,MAPT,MELTF,NKX6-1,SLIT1,SYT1,TGFB1,SEMA6C,BCL11A,CDHR2,SEMA6A,CACNG7,NRN1L
4_Summary	GO Biological Processes	GO:0006119	oxidative phosphorylation	-4.26986	-1.33527	13/145	4508,4509,4513,4514,4519,4535,4537,4538,4539,4540,4541,4706,400916,79133,316,4835,847,666,1020,2189,4137,10055,23400,23593,55154,79823,80207,81892,92609,201164	ATP6,ATP8,COX2,COX3,CYTB,ND1,ND3,ND4,ND4L,ND5,ND6,NDUFAB1,CHCHD10,NDUFAF5,AOX1,NQO2,CAT,BOK,CDK5,FANCG,MAPT,SAE1,ATP13A2,HEBP2,MSTO1,CAMKMT,OPA3,SLIRP,TIMM50,PLD6
4_Member	GO Biological Processes	GO:0006119	oxidative phosphorylation	-4.26986	-1.33527	13/145	4508,4509,4513,4514,4519,4535,4537,4538,4539,4540,4541,4706,400916	ATP6,ATP8,COX2,COX3,CYTB,ND1,ND3,ND4,ND4L,ND5,ND6,NDUFAB1,CHCHD10
4_Member	GO Biological Processes	GO:0042775	mitochondrial ATP synthesis coupled electron transport	-3.91463	-1.11513	10/97	4513,4514,4519,4535,4537,4538,4539,4540,4541,4706	COX2,COX3,CYTB,ND1,ND3,ND4,ND4L,ND5,ND6,NDUFAB1
4_Member	GO Biological Processes	GO:0042773	ATP synthesis coupled electron transport	-3.87725	-1.11513	10/98	4513,4514,4519,4535,4537,4538,4539,4540,4541,4706	COX2,COX3,CYTB,ND1,ND3,ND4,ND4L,ND5,ND6,NDUFAB1
4_Member	GO Biological Processes	GO:0006120	mitochondrial electron transport, NADH to ubiquinone	-3.45814	-0.826532	7/55	4535,4537,4538,4539,4540,4541,4706	ND1,ND3,ND4,ND4L,ND5,ND6,NDUFAB1
4_Member	GO Biological Processes	GO:0022904	respiratory electron transport chain	-3.25055	-0.790305	10/117	4513,4514,4519,4535,4537,4538,4539,4540,4541,4706	COX2,COX3,CYTB,ND1,ND3,ND4,ND4L,ND5,ND6,NDUFAB1
4_Member	GO Biological Processes	GO:0010257	NADH dehydrogenase complex assembly	-3.05346	-0.718393	7/64	4535,4537,4538,4540,4541,4706,79133	ND1,ND3,ND4,ND5,ND6,NDUFAB1,NDUFAF5
4_Member	GO Biological Processes	GO:0032981	mitochondrial respiratory chain complex I assembly	-3.05346	-0.718393	7/64	4535,4537,4538,4540,4541,4706,79133	ND1,ND3,ND4,ND5,ND6,NDUFAB1,NDUFAF5
4_Member	GO Biological Processes	GO:0022900	electron transport chain	-2.69997	-0.576114	12/186	316,4513,4514,4519,4535,4537,4538,4539,4540,4541,4706,4835	AOX1,COX2,COX3,CYTB,ND1,ND3,ND4,ND4L,ND5,ND6,NDUFAB1,NQO2
4_Member	GO Biological Processes	GO:0045333	cellular respiration	-2.20205	-0.384258	11/188	847,4513,4514,4519,4535,4537,4538,4539,4540,4541,4706	CAT,COX2,COX3,CYTB,ND1,ND3,ND4,ND4L,ND5,ND6,NDUFAB1
4_Member	GO Biological Processes	GO:0007005	mitochondrion organization	-2.17969	-0.370814	23/539	666,1020,2189,4137,4508,4509,4535,4537,4538,4540,4541,4706,10055,23400,23593,55154,79133,79823,80207,81892,92609,201164,400916	BOK,CDK5,FANCG,MAPT,ATP6,ATP8,ND1,ND3,ND4,ND5,ND6,NDUFAB1,SAE1,ATP13A2,HEBP2,MSTO1,NDUFAF5,CAMKMT,OPA3,SLIRP,TIMM50,PLD6,CHCHD10
4_Member	GO Biological Processes	GO:0033108	mitochondrial respiratory chain complex assembly	-2.00987	-0.30222	7/98	4535,4537,4538,4540,4541,4706,79133	ND1,ND3,ND4,ND5,ND6,NDUFAB1,NDUFAF5
5_Summary	GO Biological Processes	GO:0019556	histidine catabolic process to glutamate and formamide	-4.25633	-1.33527	3/4	3034,131669,144193,5092,125061,9971	HAL,UROC1,AMDHD1,PCBD1,AFMID,NR1H4
5_Member	GO Biological Processes	GO:0019556	histidine catabolic process to glutamate and formamide	-4.25633	-1.33527	3/4	3034,131669,144193	HAL,UROC1,AMDHD1
5_Member	GO Biological Processes	GO:0019557	histidine catabolic process to glutamate and formate	-4.25633	-1.33527	3/4	3034,131669,144193	HAL,UROC1,AMDHD1
5_Member	GO Biological Processes	GO:0043606	formamide metabolic process	-4.25633	-1.33527	3/4	3034,131669,144193	HAL,UROC1,AMDHD1
5_Member	GO Biological Processes	GO:0015942	formate metabolic process	-3.57316	-0.904829	3/6	3034,131669,144193	HAL,UROC1,AMDHD1
5_Member	GO Biological Processes	GO:0009074	aromatic amino acid family catabolic process	-3.29582	-0.790305	5/28	3034,5092,125061,131669,144193	HAL,PCBD1,AFMID,UROC1,AMDHD1
5_Member	GO Biological Processes	GO:0006548	histidine catabolic process	-3.14177	-0.760508	3/8	3034,131669,144193	HAL,UROC1,AMDHD1
5_Member	GO Biological Processes	GO:0052805	imidazole-containing compound catabolic process	-3.14177	-0.760508	3/8	3034,131669,144193	HAL,UROC1,AMDHD1
5_Member	GO Biological Processes	GO:0006547	histidine metabolic process	-2.8265	-0.651998	3/10	3034,131669,144193	HAL,UROC1,AMDHD1
5_Member	GO Biological Processes	GO:0009072	aromatic amino acid family metabolic process	-2.62298	-0.533764	5/39	3034,5092,125061,131669,144193	HAL,PCBD1,AFMID,UROC1,AMDHD1
5_Member	GO Biological Processes	GO:0052803	imidazole-containing compound metabolic process	-2.57895	-0.509472	3/12	3034,131669,144193	HAL,UROC1,AMDHD1
5_Member	GO Biological Processes	GO:0006536	glutamate metabolic process	-2.0986	-0.342834	4/33	3034,9971,131669,144193	HAL,NR1H4,UROC1,AMDHD1
6_Summary	GO Biological Processes	GO:1901652	response to peptide	-3.90904	-1.11513	28/534	114,351,632,847,990,1020,1663,2516,2688,2693,2740,3291,3488,3553,3645,3663,4023,4519,4825,5798,5919,8473,8914,9971,51083,55971,64170,127124,156,358,672,779,6263,7098,7226,10411,22933,23236,53335	ADCY8,APP,BGLAP,CAT,CDC6,CDK5,DDX11,NR5A1,GH1,GHSR,GLP1R,HSD11B2,IGFBP5,IL1B,INSRR,IRF5,LPL,CYTB,NKX6-1,PTPRN,RARRES2,OGT,TIMELESS,NR1H4,GAL,BAIAP2L1,CARD9,ATP6V1G3,GRK2,AQP1,BRCA1,CACNA1S,RYR3,TLR3,TRPM2,RAPGEF3,SIRT2,PLCB1,BCL11A
6_Member	GO Biological Processes	GO:1901652	response to peptide	-3.90904	-1.11513	28/534	114,351,632,847,990,1020,1663,2516,2688,2693,2740,3291,3488,3553,3645,3663,4023,4519,4825,5798,5919,8473,8914,9971,51083,55971,64170,127124	ADCY8,APP,BGLAP,CAT,CDC6,CDK5,DDX11,NR5A1,GH1,GHSR,GLP1R,HSD11B2,IGFBP5,IL1B,INSRR,IRF5,LPL,CYTB,NKX6-1,PTPRN,RARRES2,OGT,TIMELESS,NR1H4,GAL,BAIAP2L1,CARD9,ATP6V1G3
6_Member	GO Biological Processes	GO:1901699	cellular response to nitrogen compound	-3.41989	-0.823698	31/660	114,156,351,358,632,672,779,990,1020,1663,2688,2693,2740,3488,3553,3645,4023,4825,5919,6263,7098,7226,8473,8914,9971,10411,22933,23236,53335,55971,127124	ADCY8,GRK2,APP,AQP1,BGLAP,BRCA1,CACNA1S,CDC6,CDK5,DDX11,GH1,GHSR,GLP1R,IGFBP5,IL1B,INSRR,LPL,NKX6-1,RARRES2,RYR3,TLR3,TRPM2,OGT,TIMELESS,NR1H4,RAPGEF3,SIRT2,PLCB1,BCL11A,BAIAP2L1,ATP6V1G3
6_Member	GO Biological Processes	GO:0071417	cellular response to organonitrogen compound	-3.13424	-0.760508	28/597	114,351,358,632,672,779,990,1020,1663,2688,2693,2740,3488,3553,3645,4023,4825,5919,6263,7226,8473,8914,9971,10411,22933,53335,55971,127124	ADCY8,APP,AQP1,BGLAP,BRCA1,CACNA1S,CDC6,CDK5,DDX11,GH1,GHSR,GLP1R,IGFBP5,IL1B,INSRR,LPL,NKX6-1,RARRES2,RYR3,TRPM2,OGT,TIMELESS,NR1H4,RAPGEF3,SIRT2,BCL11A,BAIAP2L1,ATP6V1G3
6_Member	GO Biological Processes	GO:0043434	response to peptide hormone	-2.89037	-0.661212	22/443	114,632,847,990,2516,2688,2693,2740,3291,3488,3553,3645,4023,4519,4825,5798,5919,8473,9971,51083,55971,127124	ADCY8,BGLAP,CAT,CDC6,NR5A1,GH1,GHSR,GLP1R,HSD11B2,IGFBP5,IL1B,INSRR,LPL,CYTB,NKX6-1,PTPRN,RARRES2,OGT,NR1H4,GAL,BAIAP2L1,ATP6V1G3
6_Member	GO Biological Processes	GO:1901653	cellular response to peptide	-2.39843	-0.431381	19/397	114,351,632,990,1020,1663,2688,2693,2740,3553,3645,4023,4825,5919,8473,8914,9971,55971,127124	ADCY8,APP,BGLAP,CDC6,CDK5,DDX11,GH1,GHSR,GLP1R,IL1B,INSRR,LPL,NKX6-1,RARRES2,OGT,TIMELESS,NR1H4,BAIAP2L1,ATP6V1G3
6_Member	GO Biological Processes	GO:0032868	response to insulin	-2.07387	-0.326939	14/279	632,847,2693,3291,3553,3645,4023,5798,5919,8473,9971,51083,55971,127124	BGLAP,CAT,GHSR,HSD11B2,IL1B,INSRR,LPL,PTPRN,RARRES2,OGT,NR1H4,GAL,BAIAP2L1,ATP6V1G3
7_Summary	GO Biological Processes	GO:0098662	inorganic cation transmembrane transport	-3.87411	-1.11513	36/767	356,358,489,779,1020,2185,3776,3787,4508,4509,4513,4514,4519,4538,6263,6337,6338,6543,7226,7991,9104,10368,23236,23315,51083,54997,55013,57113,59284,84329,84812,116444,117531,127124,196527,246329,6523,7432,23439	FASLG,AQP1,ATP2A3,CACNA1S,CDK5,PTK2B,KCNK2,KCNS1,ATP6,ATP8,COX2,COX3,CYTB,ND4,RYR3,SCNN1A,SCNN1B,SLC8A2,TRPM2,TUSC3,RGN,CACNG3,PLCB1,SLC9A8,GAL,TESC,MCUB,TRPC7,CACNG7,HVCN1,PLCD4,GRIN3B,TMC1,ATP6V1G3,ANO6,STAC3,SLC5A1,VIP,ATP1B4
7_Member	GO Biological Processes	GO:0098662	inorganic cation transmembrane transport	-3.87411	-1.11513	36/767	356,358,489,779,1020,2185,3776,3787,4508,4509,4513,4514,4519,4538,6263,6337,6338,6543,7226,7991,9104,10368,23236,23315,51083,54997,55013,57113,59284,84329,84812,116444,117531,127124,196527,246329	FASLG,AQP1,ATP2A3,CACNA1S,CDK5,PTK2B,KCNK2,KCNS1,ATP6,ATP8,COX2,COX3,CYTB,ND4,RYR3,SCNN1A,SCNN1B,SLC8A2,TRPM2,TUSC3,RGN,CACNG3,PLCB1,SLC9A8,GAL,TESC,MCUB,TRPC7,CACNG7,HVCN1,PLCD4,GRIN3B,TMC1,ATP6V1G3,ANO6,STAC3
7_Member	GO Biological Processes	GO:1902600	proton transmembrane transport	-2.6925	-0.575477	11/162	489,4508,4509,4513,4514,4519,4538,23315,54997,84329,127124	ATP2A3,ATP6,ATP8,COX2,COX3,CYTB,ND4,SLC9A8,TESC,HVCN1,ATP6V1G3
7_Member	GO Biological Processes	GO:0015672	monovalent inorganic cation transport	-2.48777	-0.468924	24/538	358,489,2185,3776,3787,4508,4509,4513,4514,4519,4538,6337,6338,6523,6543,7226,7432,23315,23439,51083,54997,84329,127124,196527	AQP1,ATP2A3,PTK2B,KCNK2,KCNS1,ATP6,ATP8,COX2,COX3,CYTB,ND4,SCNN1A,SCNN1B,SLC5A1,SLC8A2,TRPM2,VIP,SLC9A8,ATP1B4,GAL,TESC,HVCN1,ATP6V1G3,ANO6
8_Summary	GO Biological Processes	GO:0014004	microglia differentiation	-3.86629	-1.11513	3/5	351,7040,375387,156,1020,1111,1195,5470,22933,84630,85366,666,2817,3553,4137,4825,85414	APP,TGFB1,NRROS,GRK2,CDK5,CHEK1,CLK1,PPEF2,SIRT2,TTBK1,MYLK2,BOK,GPC1,IL1B,MAPT,NKX6-1,SLC45A3
8_Member	GO Biological Processes	GO:0014004	microglia differentiation	-3.86629	-1.11513	3/5	351,7040,375387	APP,TGFB1,NRROS
8_Member	GO Biological Processes	GO:0018107	peptidyl-threonine phosphorylation	-3.28004	-0.790305	10/116	156,351,1020,1111,1195,5470,7040,22933,84630,85366	GRK2,APP,CDK5,CHEK1,CLK1,PPEF2,TGFB1,SIRT2,TTBK1,MYLK2
8_Member	GO Biological Processes	GO:0018210	peptidyl-threonine modification	-3.05339	-0.718393	10/124	156,351,1020,1111,1195,5470,7040,22933,84630,85366	GRK2,APP,CDK5,CHEK1,CLK1,PPEF2,TGFB1,SIRT2,TTBK1,MYLK2
8_Member	GO Biological Processes	GO:0010001	glial cell differentiation	-2.04474	-0.319149	12/225	351,666,1020,2817,3553,4137,4825,7040,22933,84630,85414,375387	APP,BOK,CDK5,GPC1,IL1B,MAPT,NKX6-1,TGFB1,SIRT2,TTBK1,SLC45A3,NRROS
9_Summary	GO Biological Processes	GO:0032530	regulation of microvillus organization	-3.6901	-0.981651	4/13	5357,5909,6624,54825	PLS1,RAP1GAP,FSCN1,CDHR2
9_Member	GO Biological Processes	GO:0032530	regulation of microvillus organization	-3.6901	-0.981651	4/13	5357,5909,6624,54825	PLS1,RAP1GAP,FSCN1,CDHR2
9_Member	GO Biological Processes	GO:0032528	microvillus organization	-2.24797	-0.404187	4/30	5357,5909,6624,54825	PLS1,RAP1GAP,FSCN1,CDHR2
10_Summary	GO Biological Processes	GO:0006816	calcium ion transport	-3.59722	-0.91386	24/446	356,489,779,816,1020,2185,5026,6263,6351,6543,7226,9104,10203,10368,23236,55013,57113,59284,84812,116444,117531,196527,246329,283229,7991,114,351,666,796,2740,9900,23400,51554,79734,84636,1627,2512,2516,3553,4023,4188,8399,9641,64714,375387,400916,4241,6337,6338,6521,23315,127124	FASLG,ATP2A3,CACNA1S,CAMK2B,CDK5,PTK2B,P2RX5,RYR3,CCL4,SLC8A2,TRPM2,RGN,CALCRL,CACNG3,PLCB1,MCUB,TRPC7,CACNG7,PLCD4,GRIN3B,TMC1,ANO6,STAC3,CRACR2B,TUSC3,ADCY8,APP,BOK,CALCA,GLP1R,SV2A,ATP13A2,ACKR4,KCTD17,GPR174,DBN1,FTL,NR5A1,IL1B,LPL,MDFI,PLA2G10,IKBKE,PDIA2,NRROS,CHCHD10,MELTF,SCNN1A,SCNN1B,SLC4A1,SLC9A8,ATP6V1G3
10_Member	GO Biological Processes	GO:0006816	calcium ion transport	-3.59722	-0.91386	24/446	356,489,779,816,1020,2185,5026,6263,6351,6543,7226,9104,10203,10368,23236,55013,57113,59284,84812,116444,117531,196527,246329,283229	FASLG,ATP2A3,CACNA1S,CAMK2B,CDK5,PTK2B,P2RX5,RYR3,CCL4,SLC8A2,TRPM2,RGN,CALCRL,CACNG3,PLCB1,MCUB,TRPC7,CACNG7,PLCD4,GRIN3B,TMC1,ANO6,STAC3,CRACR2B
10_Member	GO Biological Processes	GO:0070588	calcium ion transmembrane transport	-3.33474	-0.790305	19/329	356,489,779,1020,2185,6263,6543,7226,9104,10368,23236,55013,57113,59284,84812,116444,117531,196527,246329	FASLG,ATP2A3,CACNA1S,CDK5,PTK2B,RYR3,SLC8A2,TRPM2,RGN,CACNG3,PLCB1,MCUB,TRPC7,CACNG7,PLCD4,GRIN3B,TMC1,ANO6,STAC3
10_Member	GO Biological Processes	GO:0070838	divalent metal ion transport	-3.31249	-0.790305	25/495	356,489,779,816,1020,2185,5026,6263,6351,6543,7226,7991,9104,10203,10368,23236,55013,57113,59284,84812,116444,117531,196527,246329,283229	FASLG,ATP2A3,CACNA1S,CAMK2B,CDK5,PTK2B,P2RX5,RYR3,CCL4,SLC8A2,TRPM2,TUSC3,RGN,CALCRL,CACNG3,PLCB1,MCUB,TRPC7,CACNG7,PLCD4,GRIN3B,TMC1,ANO6,STAC3,CRACR2B
10_Member	GO Biological Processes	GO:0072511	divalent inorganic cation transport	-3.23678	-0.790305	25/501	356,489,779,816,1020,2185,5026,6263,6351,6543,7226,7991,9104,10203,10368,23236,55013,57113,59284,84812,116444,117531,196527,246329,283229	FASLG,ATP2A3,CACNA1S,CAMK2B,CDK5,PTK2B,P2RX5,RYR3,CCL4,SLC8A2,TRPM2,TUSC3,RGN,CALCRL,CACNG3,PLCB1,MCUB,TRPC7,CACNG7,PLCD4,GRIN3B,TMC1,ANO6,STAC3,CRACR2B
10_Member	GO Biological Processes	GO:0006874	cellular calcium ion homeostasis	-2.88789	-0.661212	23/472	114,351,356,489,666,796,1020,2185,2740,5026,6263,6543,7226,9104,9900,23236,23400,51554,55013,57113,79734,84636,84812	ADCY8,APP,FASLG,ATP2A3,BOK,CALCA,CDK5,PTK2B,GLP1R,P2RX5,RYR3,SLC8A2,TRPM2,RGN,SV2A,PLCB1,ATP13A2,ACKR4,MCUB,TRPC7,KCTD17,GPR174,PLCD4
10_Member	GO Biological Processes	GO:0055074	calcium ion homeostasis	-2.74736	-0.600625	23/484	114,351,356,489,666,796,1020,2185,2740,5026,6263,6543,7226,9104,9900,23236,23400,51554,55013,57113,79734,84636,84812	ADCY8,APP,FASLG,ATP2A3,BOK,CALCA,CDK5,PTK2B,GLP1R,P2RX5,RYR3,SLC8A2,TRPM2,RGN,SV2A,PLCB1,ATP13A2,ACKR4,MCUB,TRPC7,KCTD17,GPR174,PLCD4
10_Member	GO Biological Processes	GO:0051235	maintenance of location	-2.72177	-0.593838	18/343	356,1020,1627,2185,2512,2516,3553,4023,4188,6263,7226,8399,9641,23236,64714,84812,375387,400916	FASLG,CDK5,DBN1,PTK2B,FTL,NR5A1,IL1B,LPL,MDFI,RYR3,TRPM2,PLA2G10,IKBKE,PLCB1,PDIA2,PLCD4,NRROS,CHCHD10
10_Member	GO Biological Processes	GO:0072503	cellular divalent inorganic cation homeostasis	-2.49544	-0.468924	23/507	114,351,356,489,666,796,1020,2185,2740,5026,6263,6543,7226,9104,9900,23236,23400,51554,55013,57113,79734,84636,84812	ADCY8,APP,FASLG,ATP2A3,BOK,CALCA,CDK5,PTK2B,GLP1R,P2RX5,RYR3,SLC8A2,TRPM2,RGN,SV2A,PLCB1,ATP13A2,ACKR4,MCUB,TRPC7,KCTD17,GPR174,PLCD4
10_Member	GO Biological Processes	GO:0072507	divalent inorganic cation homeostasis	-2.30337	-0.417473	23/526	114,351,356,489,666,796,1020,2185,2740,5026,6263,6543,7226,9104,9900,23236,23400,51554,55013,57113,79734,84636,84812	ADCY8,APP,FASLG,ATP2A3,BOK,CALCA,CDK5,PTK2B,GLP1R,P2RX5,RYR3,SLC8A2,TRPM2,RGN,SV2A,PLCB1,ATP13A2,ACKR4,MCUB,TRPC7,KCTD17,GPR174,PLCD4
10_Member	GO Biological Processes	GO:0055080	cation homeostasis	-2.29098	-0.417473	30/748	114,351,356,489,666,796,1020,2185,2512,2740,4241,5026,6263,6337,6338,6521,6543,7226,9104,9900,23236,23315,23400,51554,55013,57113,79734,84636,84812,127124	ADCY8,APP,FASLG,ATP2A3,BOK,CALCA,CDK5,PTK2B,FTL,GLP1R,MELTF,P2RX5,RYR3,SCNN1A,SCNN1B,SLC4A1,SLC8A2,TRPM2,RGN,SV2A,PLCB1,SLC9A8,ATP13A2,ACKR4,MCUB,TRPC7,KCTD17,GPR174,PLCD4,ATP6V1G3
10_Member	GO Biological Processes	GO:0098771	inorganic ion homeostasis	-2.20398	-0.384258	30/759	114,351,356,489,666,796,1020,2185,2512,2740,4241,5026,6263,6337,6338,6521,6543,7226,9104,9900,23236,23315,23400,51554,55013,57113,79734,84636,84812,127124	ADCY8,APP,FASLG,ATP2A3,BOK,CALCA,CDK5,PTK2B,FTL,GLP1R,MELTF,P2RX5,RYR3,SCNN1A,SCNN1B,SLC4A1,SLC8A2,TRPM2,RGN,SV2A,PLCB1,SLC9A8,ATP13A2,ACKR4,MCUB,TRPC7,KCTD17,GPR174,PLCD4,ATP6V1G3
10_Member	GO Biological Processes	GO:0055065	metal ion homeostasis	-2.15764	-0.363388	27/668	114,351,356,489,666,796,1020,2185,2512,2740,4241,5026,6263,6337,6338,6543,7226,9104,9900,23236,23400,51554,55013,57113,79734,84636,84812	ADCY8,APP,FASLG,ATP2A3,BOK,CALCA,CDK5,PTK2B,FTL,GLP1R,MELTF,P2RX5,RYR3,SCNN1A,SCNN1B,SLC8A2,TRPM2,RGN,SV2A,PLCB1,ATP13A2,ACKR4,MCUB,TRPC7,KCTD17,GPR174,PLCD4
10_Member	GO Biological Processes	GO:0030003	cellular cation homeostasis	-2.12499	-0.358145	27/672	114,351,356,489,666,796,1020,2185,2512,2740,5026,6263,6521,6543,7226,9104,9900,23236,23315,23400,51554,55013,57113,79734,84636,84812,127124	ADCY8,APP,FASLG,ATP2A3,BOK,CALCA,CDK5,PTK2B,FTL,GLP1R,P2RX5,RYR3,SLC4A1,SLC8A2,TRPM2,RGN,SV2A,PLCB1,SLC9A8,ATP13A2,ACKR4,MCUB,TRPC7,KCTD17,GPR174,PLCD4,ATP6V1G3
10_Member	GO Biological Processes	GO:0006873	cellular ion homeostasis	-2.02176	-0.30222	27/685	114,351,356,489,666,796,1020,2185,2512,2740,5026,6263,6521,6543,7226,9104,9900,23236,23315,23400,51554,55013,57113,79734,84636,84812,127124	ADCY8,APP,FASLG,ATP2A3,BOK,CALCA,CDK5,PTK2B,FTL,GLP1R,P2RX5,RYR3,SLC4A1,SLC8A2,TRPM2,RGN,SV2A,PLCB1,SLC9A8,ATP13A2,ACKR4,MCUB,TRPC7,KCTD17,GPR174,PLCD4,ATP6V1G3
11_Summary	GO Biological Processes	GO:1904029	regulation of cyclin-dependent protein kinase activity	-3.59516	-0.91386	10/106	905,990,3326,7023,10309,10614,57018,81669,84630,245711	CCNT2,CDC6,HSP90AB1,TFAP4,CCNO,HEXIM1,CCNL1,CCNL2,TTBK1,SPDYA
11_Member	GO Biological Processes	GO:1904029	regulation of cyclin-dependent protein kinase activity	-3.59516	-0.91386	10/106	905,990,3326,7023,10309,10614,57018,81669,84630,245711	CCNT2,CDC6,HSP90AB1,TFAP4,CCNO,HEXIM1,CCNL1,CCNL2,TTBK1,SPDYA
11_Member	GO Biological Processes	GO:1904031	positive regulation of cyclin-dependent protein kinase activity	-2.83739	-0.651998	5/35	905,990,3326,84630,245711	CCNT2,CDC6,HSP90AB1,TTBK1,SPDYA
11_Member	GO Biological Processes	GO:0000079	regulation of cyclin-dependent protein serine/threonine kinase activity	-2.47301	-0.468924	8/102	905,990,7023,10309,10614,57018,81669,245711	CCNT2,CDC6,TFAP4,CCNO,HEXIM1,CCNL1,CCNL2,SPDYA
12_Summary	GO Biological Processes	GO:2000249	regulation of actin cytoskeleton reorganization	-3.55295	-0.897207	6/38	1020,2185,7226,10411,55971,80115,310,358,1627,3326,4137,4825,5357,10500,23400,29765,54825,54942,57556,80206,81873,146206,196527,796,1621,7432,351,1280,1289,1832,2670,2693,3861,3872,4070,6281,6624,7138,7373,55616,55930,63894,79983,29119,85366,85458,604,3645,4635,30846	CDK5,PTK2B,TRPM2,RAPGEF3,BAIAP2L1,BAIAP2L2,ANXA7,AQP1,DBN1,HSP90AB1,MAPT,NKX6-1,PLS1,SEMA6C,ATP13A2,TMOD4,CDHR2,ABITRAM,SEMA6A,FHOD3,ARPC5L,CARMIL2,ANO6,CALCA,DBH,VIP,APP,COL2A1,COL5A1,DSP,GFAP,GHSR,KRT14,KRT17,TACSTD2,S100A10,FSCN1,TNNT1,COL14A1,ASAP3,MYO5C,VIPAS39,POF1B,CTNNA3,MYLK2,DIXDC1,BCL6,INSRR,MYL4,EHD2
12_Member	GO Biological Processes	GO:2000249	regulation of actin cytoskeleton reorganization	-3.55295	-0.897207	6/38	1020,2185,7226,10411,55971,80115	CDK5,PTK2B,TRPM2,RAPGEF3,BAIAP2L1,BAIAP2L2
12_Member	GO Biological Processes	GO:0032535	regulation of cellular component size	-3.40026	-0.823698	21/378	310,358,1020,1627,2185,3326,4137,4825,5357,10500,23400,29765,54825,54942,55971,57556,80115,80206,81873,146206,196527	ANXA7,AQP1,CDK5,DBN1,PTK2B,HSP90AB1,MAPT,NKX6-1,PLS1,SEMA6C,ATP13A2,TMOD4,CDHR2,ABITRAM,BAIAP2L1,SEMA6A,BAIAP2L2,FHOD3,ARPC5L,CARMIL2,ANO6
12_Member	GO Biological Processes	GO:0090066	regulation of anatomical structure size	-2.73069	-0.595341	24/515	310,358,796,1020,1621,1627,2185,3326,4137,4825,5357,7432,10500,23400,29765,54825,54942,55971,57556,80115,80206,81873,146206,196527	ANXA7,AQP1,CALCA,CDK5,DBH,DBN1,PTK2B,HSP90AB1,MAPT,NKX6-1,PLS1,VIP,SEMA6C,ATP13A2,TMOD4,CDHR2,ABITRAM,BAIAP2L1,SEMA6A,BAIAP2L2,FHOD3,ARPC5L,CARMIL2,ANO6
12_Member	GO Biological Processes	GO:0097435	supramolecular fiber organization	-2.72407	-0.593838	30/698	351,1280,1289,1627,1832,2185,2670,2693,3326,3861,3872,4070,4137,5357,6281,6624,7138,7373,10411,29765,54942,55616,55930,55971,63894,79983,80115,80206,81873,146206	APP,COL2A1,COL5A1,DBN1,DSP,PTK2B,GFAP,GHSR,HSP90AB1,KRT14,KRT17,TACSTD2,MAPT,PLS1,S100A10,FSCN1,TNNT1,COL14A1,RAPGEF3,TMOD4,ABITRAM,ASAP3,MYO5C,BAIAP2L1,VIPAS39,POF1B,BAIAP2L2,FHOD3,ARPC5L,CARMIL2
12_Member	GO Biological Processes	GO:0032970	regulation of actin filament-based process	-2.66287	-0.559967	20/404	1020,1627,1832,2185,4070,6281,6624,7226,10411,29119,29765,54942,55616,55971,80115,80206,81873,85366,85458,146206	CDK5,DBN1,DSP,PTK2B,TACSTD2,S100A10,FSCN1,TRPM2,RAPGEF3,CTNNA3,TMOD4,ABITRAM,ASAP3,BAIAP2L1,BAIAP2L2,FHOD3,ARPC5L,MYLK2,DIXDC1,CARMIL2
12_Member	GO Biological Processes	GO:0032956	regulation of actin cytoskeleton organization	-2.1587	-0.363388	17/359	1020,1627,2185,4070,6281,6624,7226,10411,29765,54942,55616,55971,80115,80206,81873,85458,146206	CDK5,DBN1,PTK2B,TACSTD2,S100A10,FSCN1,TRPM2,RAPGEF3,TMOD4,ABITRAM,ASAP3,BAIAP2L1,BAIAP2L2,FHOD3,ARPC5L,DIXDC1,CARMIL2
12_Member	GO Biological Processes	GO:0030029	actin filament-based process	-2.00927	-0.30222	30/785	358,604,1020,1627,1832,2185,2693,3645,4070,4635,5357,6281,6624,7138,7226,10411,29119,29765,30846,54942,55616,55930,55971,79983,80115,80206,81873,85366,85458,146206	AQP1,BCL6,CDK5,DBN1,DSP,PTK2B,GHSR,INSRR,TACSTD2,MYL4,PLS1,S100A10,FSCN1,TNNT1,TRPM2,RAPGEF3,CTNNA3,TMOD4,EHD2,ABITRAM,ASAP3,MYO5C,BAIAP2L1,POF1B,BAIAP2L2,FHOD3,ARPC5L,MYLK2,DIXDC1,CARMIL2
13_Summary	GO Biological Processes	GO:0003006	developmental process involved in reproduction	-3.49296	-0.849454	32/683	652,666,1299,1396,2185,2189,2516,2693,2736,3326,3553,3645,4188,4438,4521,4678,5798,5806,7098,7482,10272,10361,10461,22933,23462,58495,80336,81892,89884,90780,116369,201164	BMP4,BOK,COL9A3,CRIP1,PTK2B,FANCG,NR5A1,GHSR,GLI2,HSP90AB1,IL1B,INSRR,MDFI,MSH4,NUDT1,NASP,PTPRN,PTX3,TLR3,WNT2B,FSTL3,NPM2,MERTK,SIRT2,HEY1,OVOL2,PABPC1L,SLIRP,LHX4,PYGO2,SLC26A8,PLD6
13_Member	GO Biological Processes	GO:0003006	developmental process involved in reproduction	-3.49296	-0.849454	32/683	652,666,1299,1396,2185,2189,2516,2693,2736,3326,3553,3645,4188,4438,4521,4678,5798,5806,7098,7482,10272,10361,10461,22933,23462,58495,80336,81892,89884,90780,116369,201164	BMP4,BOK,COL9A3,CRIP1,PTK2B,FANCG,NR5A1,GHSR,GLI2,HSP90AB1,IL1B,INSRR,MDFI,MSH4,NUDT1,NASP,PTPRN,PTX3,TLR3,WNT2B,FSTL3,NPM2,MERTK,SIRT2,HEY1,OVOL2,PABPC1L,SLIRP,LHX4,PYGO2,SLC26A8,PLD6
13_Member	GO Biological Processes	GO:0048608	reproductive structure development	-2.94047	-0.675554	22/439	652,666,1299,1396,2189,2516,2693,2736,3326,4188,4438,4521,4678,5798,5806,7098,7482,10272,10461,23462,58495,89884	BMP4,BOK,COL9A3,CRIP1,FANCG,NR5A1,GHSR,GLI2,HSP90AB1,MDFI,MSH4,NUDT1,NASP,PTPRN,PTX3,TLR3,WNT2B,FSTL3,MERTK,HEY1,OVOL2,LHX4
13_Member	GO Biological Processes	GO:0061458	reproductive system development	-2.89037	-0.661212	22/443	652,666,1299,1396,2189,2516,2693,2736,3326,4188,4438,4521,4678,5798,5806,7098,7482,10272,10461,23462,58495,89884	BMP4,BOK,COL9A3,CRIP1,FANCG,NR5A1,GHSR,GLI2,HSP90AB1,MDFI,MSH4,NUDT1,NASP,PTPRN,PTX3,TLR3,WNT2B,FSTL3,MERTK,HEY1,OVOL2,LHX4
13_Member	GO Biological Processes	GO:0008406	gonad development	-2.14848	-0.360291	12/218	666,1299,2189,2516,4438,4521,4678,5798,5806,7098,7482,10272	BOK,COL9A3,FANCG,NR5A1,MSH4,NUDT1,NASP,PTPRN,PTX3,TLR3,WNT2B,FSTL3
13_Member	GO Biological Processes	GO:0045137	development of primary sexual characteristics	-2.05924	-0.322482	12/224	666,1299,2189,2516,4438,4521,4678,5798,5806,7098,7482,10272	BOK,COL9A3,FANCG,NR5A1,MSH4,NUDT1,NASP,PTPRN,PTX3,TLR3,WNT2B,FSTL3
14_Summary	GO Biological Processes	GO:0007268	chemical synaptic transmission	-3.41526	-0.823698	33/720	114,351,816,1020,1138,1621,1627,2030,2185,2693,3553,3798,4137,5026,5913,6511,6543,6620,6623,6843,6857,8292,9900,11178,23236,23504,57449,85366,116444,124925,246329,415117,594857,5064,6585,8997,55203,58512,63827,84623,91752,266727,400916,666,1832,3776,10401,23593,29119,79845,401190	ADCY8,APP,CAMK2B,CDK5,CHRNA5,DBH,DBN1,SLC29A1,PTK2B,GHSR,IL1B,KIF5A,MAPT,P2RX5,RAPSN,SLC1A6,SLC8A2,SNCB,SNCG,VAMP1,SYT1,COLQ,SV2A,LZTS1,PLCB1,RIMBP2,PLEKHG5,MYLK2,GRIN3B,SEZ6,STAC3,STX19,NPS,PALM,SLIT1,KALRN,LGI2,DLGAP3,BCAN,KIRREL3,ZNF804A,MDGA1,CHCHD10,BOK,DSP,KCNK2,PIAS3,HEBP2,CTNNA3,RNF122,RGS7BP
14_Member	GO Biological Processes	GO:0007268	chemical synaptic transmission	-3.41526	-0.823698	33/720	114,351,816,1020,1138,1621,1627,2030,2185,2693,3553,3798,4137,5026,5913,6511,6543,6620,6623,6843,6857,8292,9900,11178,23236,23504,57449,85366,116444,124925,246329,415117,594857	ADCY8,APP,CAMK2B,CDK5,CHRNA5,DBH,DBN1,SLC29A1,PTK2B,GHSR,IL1B,KIF5A,MAPT,P2RX5,RAPSN,SLC1A6,SLC8A2,SNCB,SNCG,VAMP1,SYT1,COLQ,SV2A,LZTS1,PLCB1,RIMBP2,PLEKHG5,MYLK2,GRIN3B,SEZ6,STAC3,STX19,NPS
14_Member	GO Biological Processes	GO:0098916	anterograde trans-synaptic signaling	-3.41526	-0.823698	33/720	114,351,816,1020,1138,1621,1627,2030,2185,2693,3553,3798,4137,5026,5913,6511,6543,6620,6623,6843,6857,8292,9900,11178,23236,23504,57449,85366,116444,124925,246329,415117,594857	ADCY8,APP,CAMK2B,CDK5,CHRNA5,DBH,DBN1,SLC29A1,PTK2B,GHSR,IL1B,KIF5A,MAPT,P2RX5,RAPSN,SLC1A6,SLC8A2,SNCB,SNCG,VAMP1,SYT1,COLQ,SV2A,LZTS1,PLCB1,RIMBP2,PLEKHG5,MYLK2,GRIN3B,SEZ6,STAC3,STX19,NPS
14_Member	GO Biological Processes	GO:0099537	trans-synaptic signaling	-3.33157	-0.790305	33/728	114,351,816,1020,1138,1621,1627,2030,2185,2693,3553,3798,4137,5026,5913,6511,6543,6620,6623,6843,6857,8292,9900,11178,23236,23504,57449,85366,116444,124925,246329,415117,594857	ADCY8,APP,CAMK2B,CDK5,CHRNA5,DBH,DBN1,SLC29A1,PTK2B,GHSR,IL1B,KIF5A,MAPT,P2RX5,RAPSN,SLC1A6,SLC8A2,SNCB,SNCG,VAMP1,SYT1,COLQ,SV2A,LZTS1,PLCB1,RIMBP2,PLEKHG5,MYLK2,GRIN3B,SEZ6,STAC3,STX19,NPS
14_Member	GO Biological Processes	GO:0099536	synaptic signaling	-3.28018	-0.790305	33/733	114,351,816,1020,1138,1621,1627,2030,2185,2693,3553,3798,4137,5026,5913,6511,6543,6620,6623,6843,6857,8292,9900,11178,23236,23504,57449,85366,116444,124925,246329,415117,594857	ADCY8,APP,CAMK2B,CDK5,CHRNA5,DBH,DBN1,SLC29A1,PTK2B,GHSR,IL1B,KIF5A,MAPT,P2RX5,RAPSN,SLC1A6,SLC8A2,SNCB,SNCG,VAMP1,SYT1,COLQ,SV2A,LZTS1,PLCB1,RIMBP2,PLEKHG5,MYLK2,GRIN3B,SEZ6,STAC3,STX19,NPS
14_Member	GO Biological Processes	GO:0050808	synapse organization	-3.04314	-0.718393	22/431	351,816,1020,1627,2693,4137,5064,5913,6543,6585,6620,6623,8292,8997,55203,58512,63827,84623,91752,124925,266727,400916	APP,CAMK2B,CDK5,DBN1,GHSR,MAPT,PALM,RAPSN,SLC8A2,SLIT1,SNCB,SNCG,COLQ,KALRN,LGI2,DLGAP3,BCAN,KIRREL3,ZNF804A,SEZ6,MDGA1,CHCHD10
14_Member	GO Biological Processes	GO:0042391	regulation of membrane potential	-2.54442	-0.482409	21/443	351,666,1020,1138,1832,2030,2185,3776,4137,5026,6511,6543,10401,23593,29119,79845,116444,124925,400916,401190,594857	APP,BOK,CDK5,CHRNA5,DSP,SLC29A1,PTK2B,KCNK2,MAPT,P2RX5,SLC1A6,SLC8A2,PIAS3,HEBP2,CTNNA3,RNF122,GRIN3B,SEZ6,CHCHD10,RGS7BP,NPS
14_Member	GO Biological Processes	GO:0060078	regulation of postsynaptic membrane potential	-2.50182	-0.468924	10/147	351,1020,1138,2030,2185,5026,6543,116444,124925,401190	APP,CDK5,CHRNA5,SLC29A1,PTK2B,P2RX5,SLC8A2,GRIN3B,SEZ6,RGS7BP
14_Member	GO Biological Processes	GO:0060079	excitatory postsynaptic potential	-2.44697	-0.448555	8/103	351,1020,1138,2030,2185,5026,6543,124925	APP,CDK5,CHRNA5,SLC29A1,PTK2B,P2RX5,SLC8A2,SEZ6
14_Member	GO Biological Processes	GO:0099565	chemical synaptic transmission, postsynaptic	-2.22742	-0.387897	8/112	351,1020,1138,2030,2185,5026,6543,124925	APP,CDK5,CHRNA5,SLC29A1,PTK2B,P2RX5,SLC8A2,SEZ6
14_Member	GO Biological Processes	GO:0050804	modulation of chemical synaptic transmission	-2.14657	-0.360058	20/450	114,351,816,1020,1138,1627,2185,2693,3553,4137,5913,6543,6623,6843,6857,11178,23236,57449,116444,594857	ADCY8,APP,CAMK2B,CDK5,CHRNA5,DBN1,PTK2B,GHSR,IL1B,MAPT,RAPSN,SLC8A2,SNCG,VAMP1,SYT1,LZTS1,PLCB1,PLEKHG5,GRIN3B,NPS
14_Member	GO Biological Processes	GO:0099177	regulation of trans-synaptic signaling	-2.13645	-0.358145	20/451	114,351,816,1020,1138,1627,2185,2693,3553,4137,5913,6543,6623,6843,6857,11178,23236,57449,116444,594857	ADCY8,APP,CAMK2B,CDK5,CHRNA5,DBN1,PTK2B,GHSR,IL1B,MAPT,RAPSN,SLC8A2,SNCG,VAMP1,SYT1,LZTS1,PLCB1,PLEKHG5,GRIN3B,NPS
15_Summary	GO Biological Processes	GO:0032755	positive regulation of interleukin-6 production	-3.40728	-0.823698	9/92	351,2207,3553,3570,4023,7098,10417,64170,114900,727,3574,9971,2693,4137,84630,947,11326	APP,FCER1G,IL1B,IL6R,LPL,TLR3,SPON2,CARD9,C1QTNF4,C5,IL7,NR1H4,GHSR,MAPT,TTBK1,CD34,VSIG4
15_Member	GO Biological Processes	GO:0032755	positive regulation of interleukin-6 production	-3.40728	-0.823698	9/92	351,2207,3553,3570,4023,7098,10417,64170,114900	APP,FCER1G,IL1B,IL6R,LPL,TLR3,SPON2,CARD9,C1QTNF4
15_Member	GO Biological Processes	GO:0032722	positive regulation of chemokine production	-3.26867	-0.790305	7/59	351,727,3553,3570,3574,4023,7098	APP,C5,IL1B,IL6R,IL7,LPL,TLR3
15_Member	GO Biological Processes	GO:0032642	regulation of chemokine production	-2.97706	-0.69512	8/85	351,727,3553,3570,3574,4023,7098,9971	APP,C5,IL1B,IL6R,IL7,LPL,TLR3,NR1H4
15_Member	GO Biological Processes	GO:0032602	chemokine production	-2.75434	-0.603751	8/92	351,727,3553,3570,3574,4023,7098,9971	APP,C5,IL1B,IL6R,IL7,LPL,TLR3,NR1H4
15_Member	GO Biological Processes	GO:0032675	regulation of interleukin-6 production	-2.73511	-0.595997	11/160	351,2207,2693,3553,3570,4023,7098,9971,10417,64170,114900	APP,FCER1G,GHSR,IL1B,IL6R,LPL,TLR3,NR1H4,SPON2,CARD9,C1QTNF4
15_Member	GO Biological Processes	GO:0045080	positive regulation of chemokine biosynthetic process	-2.57895	-0.509472	3/12	351,3553,7098	APP,IL1B,TLR3
15_Member	GO Biological Processes	GO:0032635	interleukin-6 production	-2.52956	-0.475878	11/170	351,2207,2693,3553,3570,4023,7098,9971,10417,64170,114900	APP,FCER1G,GHSR,IL1B,IL6R,LPL,TLR3,NR1H4,SPON2,CARD9,C1QTNF4
15_Member	GO Biological Processes	GO:0048143	astrocyte activation	-2.41672	-0.43963	4/27	351,3553,4137,84630	APP,IL1B,MAPT,TTBK1
15_Member	GO Biological Processes	GO:0032623	interleukin-2 production	-2.34874	-0.422087	6/64	947,2207,3553,9971,11326,64170	CD34,FCER1G,IL1B,NR1H4,VSIG4,CARD9
15_Member	GO Biological Processes	GO:0045408	regulation of interleukin-6 biosynthetic process	-2.30186	-0.417473	4/29	351,2693,3553,64170	APP,GHSR,IL1B,CARD9
15_Member	GO Biological Processes	GO:0045073	regulation of chemokine biosynthetic process	-2.28682	-0.417473	3/15	351,3553,7098	APP,IL1B,TLR3
15_Member	GO Biological Processes	GO:0032760	positive regulation of tumor necrosis factor production	-2.25919	-0.409625	7/88	351,2207,4023,7098,10417,64170,114900	APP,FCER1G,LPL,TLR3,SPON2,CARD9,C1QTNF4
15_Member	GO Biological Processes	GO:0042226	interleukin-6 biosynthetic process	-2.24797	-0.404187	4/30	351,2693,3553,64170	APP,GHSR,IL1B,CARD9
15_Member	GO Biological Processes	GO:1903557	positive regulation of tumor necrosis factor superfamily cytokine production	-2.20628	-0.384258	7/90	351,2207,4023,7098,10417,64170,114900	APP,FCER1G,LPL,TLR3,SPON2,CARD9,C1QTNF4
15_Member	GO Biological Processes	GO:0042033	chemokine biosynthetic process	-2.20444	-0.384258	3/16	351,3553,7098	APP,IL1B,TLR3
15_Member	GO Biological Processes	GO:0050755	chemokine metabolic process	-2.20444	-0.384258	3/16	351,3553,7098	APP,IL1B,TLR3
15_Member	GO Biological Processes	GO:0032680	regulation of tumor necrosis factor production	-2.08088	-0.329779	10/169	351,947,2207,2693,4023,7098,9971,10417,64170,114900	APP,CD34,FCER1G,GHSR,LPL,TLR3,NR1H4,SPON2,CARD9,C1QTNF4
15_Member	GO Biological Processes	GO:1903555	regulation of tumor necrosis factor superfamily cytokine production	-2.02993	-0.308684	10/172	351,947,2207,2693,4023,7098,9971,10417,64170,114900	APP,CD34,FCER1G,GHSR,LPL,TLR3,NR1H4,SPON2,CARD9,C1QTNF4
15_Member	GO Biological Processes	GO:0032640	tumor necrosis factor production	-2.01325	-0.30222	10/173	351,947,2207,2693,4023,7098,9971,10417,64170,114900	APP,CD34,FCER1G,GHSR,LPL,TLR3,NR1H4,SPON2,CARD9,C1QTNF4
16_Summary	GO Biological Processes	GO:0010638	positive regulation of organelle organization	-3.30255	-0.790305	30/641	604,666,672,1020,1663,2185,3553,4137,5202,6281,6624,6857,8473,10055,10361,10411,22933,23236,54623,55329,55971,57535,79734,80115,81873,146206,158297,201164,255324,400916	BCL6,BOK,BRCA1,CDK5,DDX11,PTK2B,IL1B,MAPT,PFDN2,S100A10,FSCN1,SYT1,OGT,SAE1,NPM2,RAPGEF3,SIRT2,PLCB1,PAF1,MNS1,BAIAP2L1,ELAPOR1,KCTD17,BAIAP2L2,ARPC5L,CARMIL2,SAXO1,PLD6,EPGN,CHCHD10
16_Member	GO Biological Processes	GO:0010638	positive regulation of organelle organization	-3.30255	-0.790305	30/641	604,666,672,1020,1663,2185,3553,4137,5202,6281,6624,6857,8473,10055,10361,10411,22933,23236,54623,55329,55971,57535,79734,80115,81873,146206,158297,201164,255324,400916	BCL6,BOK,BRCA1,CDK5,DDX11,PTK2B,IL1B,MAPT,PFDN2,S100A10,FSCN1,SYT1,OGT,SAE1,NPM2,RAPGEF3,SIRT2,PLCB1,PAF1,MNS1,BAIAP2L1,ELAPOR1,KCTD17,BAIAP2L2,ARPC5L,CARMIL2,SAXO1,PLD6,EPGN,CHCHD10
17_Summary	GO Biological Processes	GO:0044057	regulation of system process	-3.24059	-0.790305	29/617	156,351,358,489,779,796,816,1573,1621,1832,2185,2693,2740,3488,3553,4635,6263,6543,7138,7432,10203,10368,29119,51083,51086,53632,59284,84676,85366	GRK2,APP,AQP1,ATP2A3,CACNA1S,CALCA,CAMK2B,CYP2J2,DBH,DSP,PTK2B,GHSR,GLP1R,IGFBP5,IL1B,MYL4,RYR3,SLC8A2,TNNT1,VIP,CALCRL,CACNG3,CTNNA3,GAL,TNNI3K,PRKAG3,CACNG7,TRIM63,MYLK2
17_Member	GO Biological Processes	GO:0044057	regulation of system process	-3.24059	-0.790305	29/617	156,351,358,489,779,796,816,1573,1621,1832,2185,2693,2740,3488,3553,4635,6263,6543,7138,7432,10203,10368,29119,51083,51086,53632,59284,84676,85366	GRK2,APP,AQP1,ATP2A3,CACNA1S,CALCA,CAMK2B,CYP2J2,DBH,DSP,PTK2B,GHSR,GLP1R,IGFBP5,IL1B,MYL4,RYR3,SLC8A2,TNNT1,VIP,CALCRL,CACNG3,CTNNA3,GAL,TNNI3K,PRKAG3,CACNG7,TRIM63,MYLK2
17_Member	GO Biological Processes	GO:0060047	heart contraction	-2.78781	-0.621424	16/284	156,489,779,796,1573,1832,2740,4635,6263,6543,7138,10368,29119,51086,59284,85366	GRK2,ATP2A3,CACNA1S,CALCA,CYP2J2,DSP,GLP1R,MYL4,RYR3,SLC8A2,TNNT1,CACNG3,CTNNA3,TNNI3K,CACNG7,MYLK2
17_Member	GO Biological Processes	GO:0003015	heart process	-2.63625	-0.543654	16/294	156,489,779,796,1573,1832,2740,4635,6263,6543,7138,10368,29119,51086,59284,85366	GRK2,ATP2A3,CACNA1S,CALCA,CYP2J2,DSP,GLP1R,MYL4,RYR3,SLC8A2,TNNT1,CACNG3,CTNNA3,TNNI3K,CACNG7,MYLK2
17_Member	GO Biological Processes	GO:0008016	regulation of heart contraction	-2.42346	-0.43963	14/254	156,489,779,796,1573,1832,2740,4635,6263,6543,10368,29119,51086,59284	GRK2,ATP2A3,CACNA1S,CALCA,CYP2J2,DSP,GLP1R,MYL4,RYR3,SLC8A2,CACNG3,CTNNA3,TNNI3K,CACNG7
17_Member	GO Biological Processes	GO:1903522	regulation of blood circulation	-2.15797	-0.363388	15/301	156,489,779,796,1573,1621,1832,2740,4635,6263,6543,10368,29119,51086,59284	GRK2,ATP2A3,CACNA1S,CALCA,CYP2J2,DBH,DSP,GLP1R,MYL4,RYR3,SLC8A2,CACNG3,CTNNA3,TNNI3K,CACNG7
18_Summary	GO Biological Processes	GO:0001822	kidney development	-3.23424	-0.790305	17/283	652,847,947,2736,3570,4070,5017,5175,7482,8842,9104,10272,51301,54475,55083,84623,90780,1396	BMP4,CAT,CD34,GLI2,IL6R,TACSTD2,OVOL1,PECAM1,WNT2B,PROM1,RGN,FSTL3,GCNT4,NLE1,KIF26B,KIRREL3,PYGO2,CRIP1
18_Member	GO Biological Processes	GO:0001822	kidney development	-3.23424	-0.790305	17/283	652,847,947,2736,3570,4070,5017,5175,7482,8842,9104,10272,51301,54475,55083,84623,90780	BMP4,CAT,CD34,GLI2,IL6R,TACSTD2,OVOL1,PECAM1,WNT2B,PROM1,RGN,FSTL3,GCNT4,NLE1,KIF26B,KIRREL3,PYGO2
18_Member	GO Biological Processes	GO:0072001	renal system development	-3.08277	-0.721807	17/292	652,847,947,2736,3570,4070,5017,5175,7482,8842,9104,10272,51301,54475,55083,84623,90780	BMP4,CAT,CD34,GLI2,IL6R,TACSTD2,OVOL1,PECAM1,WNT2B,PROM1,RGN,FSTL3,GCNT4,NLE1,KIF26B,KIRREL3,PYGO2
18_Member	GO Biological Processes	GO:0001655	urogenital system development	-2.90696	-0.661212	18/330	652,847,947,1396,2736,3570,4070,5017,5175,7482,8842,9104,10272,51301,54475,55083,84623,90780	BMP4,CAT,CD34,CRIP1,GLI2,IL6R,TACSTD2,OVOL1,PECAM1,WNT2B,PROM1,RGN,FSTL3,GCNT4,NLE1,KIF26B,KIRREL3,PYGO2
18_Member	GO Biological Processes	GO:0072010	glomerular epithelium development	-2.68064	-0.574254	4/23	652,947,5175,8842	BMP4,CD34,PECAM1,PROM1
18_Member	GO Biological Processes	GO:0072012	glomerulus vasculature development	-2.41672	-0.43963	4/27	652,947,3570,5175	BMP4,CD34,IL6R,PECAM1
18_Member	GO Biological Processes	GO:0032835	glomerulus development	-2.31545	-0.417473	6/65	652,947,3570,5175,8842,84623	BMP4,CD34,IL6R,PECAM1,PROM1,KIRREL3
18_Member	GO Biological Processes	GO:0061437	renal system vasculature development	-2.30186	-0.417473	4/29	652,947,3570,5175	BMP4,CD34,IL6R,PECAM1
18_Member	GO Biological Processes	GO:0061440	kidney vasculature development	-2.30186	-0.417473	4/29	652,947,3570,5175	BMP4,CD34,IL6R,PECAM1
18_Member	GO Biological Processes	GO:0072109	glomerular mesangium development	-2.12791	-0.358145	3/17	652,947,3570	BMP4,CD34,IL6R
18_Member	GO Biological Processes	GO:0072006	nephron development	-2.06887	-0.326939	9/144	652,947,3570,4070,5175,7482,8842,55083,84623	BMP4,CD34,IL6R,TACSTD2,PECAM1,WNT2B,PROM1,KIF26B,KIRREL3
19_Summary	GO Biological Processes	GO:0006720	isoprenoid metabolic process	-3.20831	-0.772326	11/140	2224,2262,2817,3158,4023,5919,5947,5956,7276,9227,10654	FDPS,GPC5,GPC1,HMGCS2,LPL,RARRES2,RBP1,OPN1LW,TTR,LRAT,PMVK
19_Member	GO Biological Processes	GO:0006720	isoprenoid metabolic process	-3.20831	-0.772326	11/140	2224,2262,2817,3158,4023,5919,5947,5956,7276,9227,10654	FDPS,GPC5,GPC1,HMGCS2,LPL,RARRES2,RBP1,OPN1LW,TTR,LRAT,PMVK
19_Member	GO Biological Processes	GO:0006721	terpenoid metabolic process	-3.16412	-0.760508	10/120	2224,2262,2817,3158,4023,5919,5947,5956,7276,9227	FDPS,GPC5,GPC1,HMGCS2,LPL,RARRES2,RBP1,OPN1LW,TTR,LRAT
19_Member	GO Biological Processes	GO:0001523	retinoid metabolic process	-2.42127	-0.43963	8/104	2262,2817,4023,5919,5947,5956,7276,9227	GPC5,GPC1,LPL,RARRES2,RBP1,OPN1LW,TTR,LRAT
19_Member	GO Biological Processes	GO:0008299	isoprenoid biosynthetic process	-2.35805	-0.427754	4/28	2224,3158,5947,10654	FDPS,HMGCS2,RBP1,PMVK
19_Member	GO Biological Processes	GO:0016114	terpenoid biosynthetic process	-2.28682	-0.417473	3/15	2224,3158,5947	FDPS,HMGCS2,RBP1
19_Member	GO Biological Processes	GO:0016101	diterpenoid metabolic process	-2.27401	-0.416252	8/110	2262,2817,4023,5919,5947,5956,7276,9227	GPC5,GPC1,LPL,RARRES2,RBP1,OPN1LW,TTR,LRAT
20_Summary	GO Biological Processes	GO:0010715	regulation of extracellular matrix disassembly	-3.20128	-0.772326	4/17	4241,6624,7040,146206	MELTF,FSCN1,TGFB1,CARMIL2
20_Member	GO Biological Processes	GO:0010715	regulation of extracellular matrix disassembly	-3.20128	-0.772326	4/17	4241,6624,7040,146206	MELTF,FSCN1,TGFB1,CARMIL2
20_Member	GO Biological Processes	GO:0090091	positive regulation of extracellular matrix disassembly	-3.14177	-0.760508	3/8	4241,6624,146206	MELTF,FSCN1,CARMIL2
20_Member	GO Biological Processes	GO:1903055	positive regulation of extracellular matrix organization	-2.83414	-0.651998	4/21	4241,6624,7040,146206	MELTF,FSCN1,TGFB1,CARMIL2

## Sheet: MYOD1KO VSMYOD1NC UP
GroupID	Category	Term	Description	LogP	Log(q-value)	InTerm_InList	Genes	Symbols
1_Summary	GO Biological Processes	GO:0030010	establishment of cell polarity	-7.64496	-3.52645	11/142	2185,2302,5590,6624,10090,10252,22841,55083,56603,84446,154810,2909,23433	PTK2B,FOXJ1,PRKCZ,FSCN1,UST,SPRY1,RAB11FIP2,KIF26B,CYP26B1,BRSK1,AMOTL1,ARHGAP35,RHOQ
1_Member	GO Biological Processes	GO:0030010	establishment of cell polarity	-7.64496	-3.52645	11/142	2185,2302,5590,6624,10090,10252,22841,55083,56603,84446,154810	PTK2B,FOXJ1,PRKCZ,FSCN1,UST,SPRY1,RAB11FIP2,KIF26B,CYP26B1,BRSK1,AMOTL1
1_Member	GO Biological Processes	GO:0007163	establishment or maintenance of cell polarity	-7.42523	-3.52645	13/224	2185,2302,2909,5590,6624,10090,10252,22841,23433,55083,56603,84446,154810	PTK2B,FOXJ1,ARHGAP35,PRKCZ,FSCN1,UST,SPRY1,RAB11FIP2,RHOQ,KIF26B,CYP26B1,BRSK1,AMOTL1
2_Summary	GO Biological Processes	GO:0022604	regulation of cell morphogenesis	-6.80998	-3.08729	18/503	25,2043,2059,2185,2909,4747,5071,6696,8322,10090,10512,23433,55607,55679,56990,84446,221061,344901,1947,1948,2115,2290,4147,4781,5590,9201,653,1272,2119,6532,85458,6624,3695,683,2247,2277,5154,5795,10457,2302,4772,7399,25937,84814	ABL1,EPHA4,EPS8,PTK2B,ARHGAP35,NEFL,PRKN,SPP1,FZD4,UST,SEMA3C,RHOQ,PPP1R9A,LIMS2,CDC42SE2,BRSK1,FAM171A1,OSTN,EFNB1,EFNB2,ETV1,FOXG1,MATN2,NFIB,PRKCZ,DCLK1,BMP5,CNTN1,ETV5,SLC6A4,DIXDC1,FSCN1,ITGB7,BST1,FGF2,VEGFD,PDGFA,PTPRJ,GPNMB,FOXJ1,NFATC1,USH2A,WWTR1,PLPP7
2_Member	GO Biological Processes	GO:0022604	regulation of cell morphogenesis	-6.80998	-3.08729	18/503	25,2043,2059,2185,2909,4747,5071,6696,8322,10090,10512,23433,55607,55679,56990,84446,221061,344901	ABL1,EPHA4,EPS8,PTK2B,ARHGAP35,NEFL,PRKN,SPP1,FZD4,UST,SEMA3C,RHOQ,PPP1R9A,LIMS2,CDC42SE2,BRSK1,FAM171A1,OSTN
2_Member	GO Biological Processes	GO:0048812	neuron projection morphogenesis	-6.37674	-2.85729	20/658	25,1947,1948,2043,2115,2290,2909,4147,4747,4781,5071,5590,6696,8322,9201,10090,10512,55607,84446,344901	ABL1,EFNB1,EFNB2,EPHA4,ETV1,FOXG1,ARHGAP35,MATN2,NEFL,NFIB,PRKN,PRKCZ,SPP1,FZD4,DCLK1,UST,SEMA3C,PPP1R9A,BRSK1,OSTN
2_Member	GO Biological Processes	GO:0045664	regulation of neuron differentiation	-6.28445	-2.85729	20/667	25,653,1272,1948,2043,2119,2185,2290,2909,4747,5071,6532,6696,8322,10090,10512,55607,84446,85458,344901	ABL1,BMP5,CNTN1,EFNB2,EPHA4,ETV5,PTK2B,FOXG1,ARHGAP35,NEFL,PRKN,SLC6A4,SPP1,FZD4,UST,SEMA3C,PPP1R9A,BRSK1,DIXDC1,OSTN
2_Member	GO Biological Processes	GO:0120039	plasma membrane bounded cell projection morphogenesis	-6.23389	-2.85729	20/672	25,1947,1948,2043,2115,2290,2909,4147,4747,4781,5071,5590,6696,8322,9201,10090,10512,55607,84446,344901	ABL1,EFNB1,EFNB2,EPHA4,ETV1,FOXG1,ARHGAP35,MATN2,NEFL,NFIB,PRKN,PRKCZ,SPP1,FZD4,DCLK1,UST,SEMA3C,PPP1R9A,BRSK1,OSTN
2_Member	GO Biological Processes	GO:0048858	cell projection morphogenesis	-6.19379	-2.85729	20/676	25,1947,1948,2043,2115,2290,2909,4147,4747,4781,5071,5590,6696,8322,9201,10090,10512,55607,84446,344901	ABL1,EFNB1,EFNB2,EPHA4,ETV1,FOXG1,ARHGAP35,MATN2,NEFL,NFIB,PRKN,PRKCZ,SPP1,FZD4,DCLK1,UST,SEMA3C,PPP1R9A,BRSK1,OSTN
2_Member	GO Biological Processes	GO:0032990	cell part morphogenesis	-5.99796	-2.75239	20/696	25,1947,1948,2043,2115,2290,2909,4147,4747,4781,5071,5590,6696,8322,9201,10090,10512,55607,84446,344901	ABL1,EFNB1,EFNB2,EPHA4,ETV1,FOXG1,ARHGAP35,MATN2,NEFL,NFIB,PRKN,PRKCZ,SPP1,FZD4,DCLK1,UST,SEMA3C,PPP1R9A,BRSK1,OSTN
2_Member	GO Biological Processes	GO:0010975	regulation of neuron projection development	-5.34948	-2.34532	16/512	25,653,1272,1948,2043,2185,2909,4747,5071,6696,8322,10090,10512,55607,84446,344901	ABL1,BMP5,CNTN1,EFNB2,EPHA4,PTK2B,ARHGAP35,NEFL,PRKN,SPP1,FZD4,UST,SEMA3C,PPP1R9A,BRSK1,OSTN
2_Member	GO Biological Processes	GO:0120035	regulation of plasma membrane bounded cell projection organization	-5.24864	-2.3041	19/713	25,653,1272,1948,2043,2059,2185,2909,4747,5071,6624,6696,8322,10090,10512,23433,55607,84446,344901	ABL1,BMP5,CNTN1,EFNB2,EPHA4,EPS8,PTK2B,ARHGAP35,NEFL,PRKN,FSCN1,SPP1,FZD4,UST,SEMA3C,RHOQ,PPP1R9A,BRSK1,OSTN
2_Member	GO Biological Processes	GO:0031344	regulation of cell projection organization	-5.1628	-2.28521	19/723	25,653,1272,1948,2043,2059,2185,2909,4747,5071,6624,6696,8322,10090,10512,23433,55607,84446,344901	ABL1,BMP5,CNTN1,EFNB2,EPHA4,EPS8,PTK2B,ARHGAP35,NEFL,PRKN,FSCN1,SPP1,FZD4,UST,SEMA3C,RHOQ,PPP1R9A,BRSK1,OSTN
2_Member	GO Biological Processes	GO:0007409	axonogenesis	-5.06851	-2.28367	15/478	25,1947,1948,2043,2115,2290,2909,4147,4747,4781,6696,9201,10090,10512,84446	ABL1,EFNB1,EFNB2,EPHA4,ETV1,FOXG1,ARHGAP35,MATN2,NEFL,NFIB,SPP1,DCLK1,UST,SEMA3C,BRSK1
2_Member	GO Biological Processes	GO:0000904	cell morphogenesis involved in differentiation	-4.89078	-2.18233	19/756	25,1947,1948,2043,2115,2290,2909,3695,4147,4747,4781,6696,8322,9201,10090,10512,55607,55679,84446	ABL1,EFNB1,EFNB2,EPHA4,ETV1,FOXG1,ARHGAP35,ITGB7,MATN2,NEFL,NFIB,SPP1,FZD4,DCLK1,UST,SEMA3C,PPP1R9A,LIMS2,BRSK1
2_Member	GO Biological Processes	GO:0061564	axon development	-4.58282	-1.9962	15/526	25,1947,1948,2043,2115,2290,2909,4147,4747,4781,6696,9201,10090,10512,84446	ABL1,EFNB1,EFNB2,EPHA4,ETV1,FOXG1,ARHGAP35,MATN2,NEFL,NFIB,SPP1,DCLK1,UST,SEMA3C,BRSK1
2_Member	GO Biological Processes	GO:0048667	cell morphogenesis involved in neuron differentiation	-4.51842	-1.97031	16/598	25,1947,1948,2043,2115,2290,2909,4147,4747,4781,6696,9201,10090,10512,55607,84446	ABL1,EFNB1,EFNB2,EPHA4,ETV1,FOXG1,ARHGAP35,MATN2,NEFL,NFIB,SPP1,DCLK1,UST,SEMA3C,PPP1R9A,BRSK1
2_Member	GO Biological Processes	GO:0006935	chemotaxis	-4.09856	-1.71829	16/649	683,1947,1948,2043,2115,2185,2247,2277,2290,2909,4147,4781,5154,5795,10457,10512	BST1,EFNB1,EFNB2,EPHA4,ETV1,PTK2B,FGF2,VEGFD,FOXG1,ARHGAP35,MATN2,NFIB,PDGFA,PTPRJ,GPNMB,SEMA3C
2_Member	GO Biological Processes	GO:0042330	taxis	-4.08304	-1.7093	16/651	683,1947,1948,2043,2115,2185,2247,2277,2290,2909,4147,4781,5154,5795,10457,10512	BST1,EFNB1,EFNB2,EPHA4,ETV1,PTK2B,FGF2,VEGFD,FOXG1,ARHGAP35,MATN2,NFIB,PDGFA,PTPRJ,GPNMB,SEMA3C
2_Member	GO Biological Processes	GO:0050770	regulation of axonogenesis	-3.87087	-1.53438	8/185	25,2043,2909,4747,6696,10090,10512,84446	ABL1,EPHA4,ARHGAP35,NEFL,SPP1,UST,SEMA3C,BRSK1
2_Member	GO Biological Processes	GO:0010769	regulation of cell morphogenesis involved in differentiation	-3.68279	-1.4124	10/307	25,2043,2909,4747,6696,10090,10512,55607,55679,84446	ABL1,EPHA4,ARHGAP35,NEFL,SPP1,UST,SEMA3C,PPP1R9A,LIMS2,BRSK1
2_Member	GO Biological Processes	GO:0045665	negative regulation of neuron differentiation	-3.33583	-1.16132	8/222	1948,2043,2290,6532,6696,10512,85458,344901	EFNB2,EPHA4,FOXG1,SLC6A4,SPP1,SEMA3C,DIXDC1,OSTN
2_Member	GO Biological Processes	GO:0007411	axon guidance	-3.32477	-1.15687	9/280	1947,1948,2043,2115,2290,2909,4147,4781,10512	EFNB1,EFNB2,EPHA4,ETV1,FOXG1,ARHGAP35,MATN2,NFIB,SEMA3C
2_Member	GO Biological Processes	GO:0097485	neuron projection guidance	-3.30251	-1.14013	9/282	1947,1948,2043,2115,2290,2909,4147,4781,10512	EFNB1,EFNB2,EPHA4,ETV1,FOXG1,ARHGAP35,MATN2,NFIB,SEMA3C
2_Member	GO Biological Processes	GO:0045596	negative regulation of cell differentiation	-2.87752	-0.887223	15/759	653,1948,2043,2185,2290,2302,4772,6532,6696,7399,10512,25937,84814,85458,344901	BMP5,EFNB2,EPHA4,PTK2B,FOXG1,FOXJ1,NFATC1,SLC6A4,SPP1,USH2A,SEMA3C,WWTR1,PLPP7,DIXDC1,OSTN
2_Member	GO Biological Processes	GO:0050768	negative regulation of neurogenesis	-2.55862	-0.69753	8/294	1948,2043,2290,6532,6696,10512,85458,344901	EFNB2,EPHA4,FOXG1,SLC6A4,SPP1,SEMA3C,DIXDC1,OSTN
2_Member	GO Biological Processes	GO:0051961	negative regulation of nervous system development	-2.36145	-0.566708	8/317	1948,2043,2290,6532,6696,10512,85458,344901	EFNB2,EPHA4,FOXG1,SLC6A4,SPP1,SEMA3C,DIXDC1,OSTN
2_Member	GO Biological Processes	GO:0010721	negative regulation of cell development	-2.16815	-0.442559	8/342	1948,2043,2290,6532,6696,10512,85458,344901	EFNB2,EPHA4,FOXG1,SLC6A4,SPP1,SEMA3C,DIXDC1,OSTN
2_Member	GO Biological Processes	GO:0010977	negative regulation of neuron projection development	-2.08999	-0.404729	5/153	1948,2043,6696,10512,344901	EFNB2,EPHA4,SPP1,SEMA3C,OSTN
3_Summary	GO Biological Processes	GO:0048589	developmental growth	-6.15401	-2.85729	20/680	25,1026,2099,2247,4147,5071,5081,5590,5660,5738,6532,6696,8455,8614,9201,10252,10512,25937,55083,344901,2185,5270,5795,7037,8091,9746	ABL1,CDKN1A,ESR1,FGF2,MATN2,PRKN,PAX7,PRKCZ,PSAP,PTGFRN,SLC6A4,SPP1,ATRN,STC2,DCLK1,SPRY1,SEMA3C,WWTR1,KIF26B,OSTN,PTK2B,SERPINE2,PTPRJ,TFRC,HMGA2,CLSTN3
3_Member	GO Biological Processes	GO:0048589	developmental growth	-6.15401	-2.85729	20/680	25,1026,2099,2247,4147,5071,5081,5590,5660,5738,6532,6696,8455,8614,9201,10252,10512,25937,55083,344901	ABL1,CDKN1A,ESR1,FGF2,MATN2,PRKN,PAX7,PRKCZ,PSAP,PTGFRN,SLC6A4,SPP1,ATRN,STC2,DCLK1,SPRY1,SEMA3C,WWTR1,KIF26B,OSTN
3_Member	GO Biological Processes	GO:0060560	developmental growth involved in morphogenesis	-4.64667	-2.00775	10/235	25,2099,5071,5590,6696,9201,10252,10512,55083,344901	ABL1,ESR1,PRKN,PRKCZ,SPP1,DCLK1,SPRY1,SEMA3C,KIF26B,OSTN
3_Member	GO Biological Processes	GO:0040008	regulation of growth	-3.8219	-1.50858	16/686	25,1026,2185,2247,5071,5270,5795,6532,6696,7037,8091,8455,8614,9746,10512,344901	ABL1,CDKN1A,PTK2B,FGF2,PRKN,SERPINE2,PTPRJ,SLC6A4,SPP1,TFRC,HMGA2,ATRN,STC2,CLSTN3,SEMA3C,OSTN
3_Member	GO Biological Processes	GO:0016049	cell growth	-3.73169	-1.44569	13/490	25,1026,2185,5071,5270,5590,5795,6696,7037,9201,9746,10512,344901	ABL1,CDKN1A,PTK2B,PRKN,SERPINE2,PRKCZ,PTPRJ,SPP1,TFRC,DCLK1,CLSTN3,SEMA3C,OSTN
3_Member	GO Biological Processes	GO:0048640	negative regulation of developmental growth	-3.50078	-1.2966	6/113	1026,6532,6696,8614,10512,344901	CDKN1A,SLC6A4,SPP1,STC2,SEMA3C,OSTN
3_Member	GO Biological Processes	GO:0048638	regulation of developmental growth	-3.23467	-1.09932	10/350	25,1026,2247,5071,6532,6696,8455,8614,10512,344901	ABL1,CDKN1A,FGF2,PRKN,SLC6A4,SPP1,ATRN,STC2,SEMA3C,OSTN
3_Member	GO Biological Processes	GO:0001558	regulation of cell growth	-3.18251	-1.07612	11/421	25,1026,2185,5071,5270,5795,6696,7037,9746,10512,344901	ABL1,CDKN1A,PTK2B,PRKN,SERPINE2,PTPRJ,SPP1,TFRC,CLSTN3,SEMA3C,OSTN
3_Member	GO Biological Processes	GO:0045926	negative regulation of growth	-2.99963	-0.961185	8/250	1026,5270,5795,6532,6696,8614,10512,344901	CDKN1A,SERPINE2,PTPRJ,SLC6A4,SPP1,STC2,SEMA3C,OSTN
3_Member	GO Biological Processes	GO:1990138	neuron projection extension	-2.56792	-0.698527	6/171	25,5071,5590,9201,10512,344901	ABL1,PRKN,PRKCZ,DCLK1,SEMA3C,OSTN
3_Member	GO Biological Processes	GO:0048588	developmental cell growth	-2.50317	-0.657471	7/236	25,5071,5590,6696,9201,10512,344901	ABL1,PRKN,PRKCZ,SPP1,DCLK1,SEMA3C,OSTN
3_Member	GO Biological Processes	GO:0030308	negative regulation of cell growth	-2.38859	-0.585043	6/186	1026,5270,5795,6696,10512,344901	CDKN1A,SERPINE2,PTPRJ,SPP1,SEMA3C,OSTN
4_Summary	GO Biological Processes	GO:0030155	regulation of cell adhesion	-5.80952	-2.60971	20/716	25,683,1947,1948,2185,2199,2302,5270,5581,5590,5795,7037,8322,8784,9891,10076,10457,55083,55679,140885,944,1026,1209,5154,10077,56603,133396,911,5660,3695	ABL1,BST1,EFNB1,EFNB2,PTK2B,FBLN2,FOXJ1,SERPINE2,PRKCE,PRKCZ,PTPRJ,TFRC,FZD4,TNFRSF18,NUAK1,PTPRU,GPNMB,KIF26B,LIMS2,SIRPA,TNFSF8,CDKN1A,CLPTM1,PDGFA,TSPAN32,CYP26B1,IL31RA,CD1C,PSAP,ITGB7
4_Member	GO Biological Processes	GO:0030155	regulation of cell adhesion	-5.80952	-2.60971	20/716	25,683,1947,1948,2185,2199,2302,5270,5581,5590,5795,7037,8322,8784,9891,10076,10457,55083,55679,140885	ABL1,BST1,EFNB1,EFNB2,PTK2B,FBLN2,FOXJ1,SERPINE2,PRKCE,PRKCZ,PTPRJ,TFRC,FZD4,TNFRSF18,NUAK1,PTPRU,GPNMB,KIF26B,LIMS2,SIRPA
4_Member	GO Biological Processes	GO:0050865	regulation of cell activation	-5.39168	-2.34532	18/632	25,683,944,1026,1209,1947,1948,2302,5154,5270,5590,7037,8784,10077,10457,56603,133396,140885	ABL1,BST1,TNFSF8,CDKN1A,CLPTM1,EFNB1,EFNB2,FOXJ1,PDGFA,SERPINE2,PRKCZ,TFRC,TNFRSF18,TSPAN32,GPNMB,CYP26B1,IL31RA,SIRPA
4_Member	GO Biological Processes	GO:0045785	positive regulation of cell adhesion	-5.10496	-2.28381	14/416	25,1947,1948,2185,2199,5581,5590,5795,7037,8784,10076,55083,55679,140885	ABL1,EFNB1,EFNB2,PTK2B,FBLN2,PRKCE,PRKCZ,PTPRJ,TFRC,TNFRSF18,PTPRU,KIF26B,LIMS2,SIRPA
4_Member	GO Biological Processes	GO:0050863	regulation of T cell activation	-4.89966	-2.18233	12/321	25,944,1209,1947,1948,2302,5590,7037,8784,10457,56603,140885	ABL1,TNFSF8,CLPTM1,EFNB1,EFNB2,FOXJ1,PRKCZ,TFRC,TNFRSF18,GPNMB,CYP26B1,SIRPA
4_Member	GO Biological Processes	GO:0002694	regulation of leukocyte activation	-4.60655	-1.99781	16/588	25,683,944,1026,1209,1947,1948,2302,5590,7037,8784,10077,10457,56603,133396,140885	ABL1,BST1,TNFSF8,CDKN1A,CLPTM1,EFNB1,EFNB2,FOXJ1,PRKCZ,TFRC,TNFRSF18,TSPAN32,GPNMB,CYP26B1,IL31RA,SIRPA
4_Member	GO Biological Processes	GO:0042110	T cell activation	-4.49637	-1.95932	14/472	25,911,944,1209,1947,1948,2302,5590,5660,7037,8784,10457,56603,140885	ABL1,CD1C,TNFSF8,CLPTM1,EFNB1,EFNB2,FOXJ1,PRKCZ,PSAP,TFRC,TNFRSF18,GPNMB,CYP26B1,SIRPA
4_Member	GO Biological Processes	GO:0046649	lymphocyte activation	-4.41231	-1.9027	18/748	25,683,911,944,1026,1209,1947,1948,2185,2302,5590,5660,5795,7037,8784,10457,56603,140885	ABL1,BST1,CD1C,TNFSF8,CDKN1A,CLPTM1,EFNB1,EFNB2,PTK2B,FOXJ1,PRKCZ,PSAP,PTPRJ,TFRC,TNFRSF18,GPNMB,CYP26B1,SIRPA
4_Member	GO Biological Processes	GO:0051249	regulation of lymphocyte activation	-4.2173	-1.79564	14/501	25,683,944,1026,1209,1947,1948,2302,5590,7037,8784,10457,56603,140885	ABL1,BST1,TNFSF8,CDKN1A,CLPTM1,EFNB1,EFNB2,FOXJ1,PRKCZ,TFRC,TNFRSF18,GPNMB,CYP26B1,SIRPA
4_Member	GO Biological Processes	GO:0030098	lymphocyte differentiation	-3.18727	-1.07612	10/355	25,944,1209,2185,2302,5590,5660,5795,8784,56603	ABL1,TNFSF8,CLPTM1,PTK2B,FOXJ1,PRKCZ,PSAP,PTPRJ,TNFRSF18,CYP26B1
4_Member	GO Biological Processes	GO:0022407	regulation of cell-cell adhesion	-3.17405	-1.07115	11/422	25,1947,1948,2302,5270,5590,7037,10076,10457,55083,140885	ABL1,EFNB1,EFNB2,FOXJ1,SERPINE2,PRKCZ,TFRC,PTPRU,GPNMB,KIF26B,SIRPA
4_Member	GO Biological Processes	GO:0030217	T cell differentiation	-3.07905	-1.01596	8/243	25,944,1209,2302,5590,5660,8784,56603	ABL1,TNFSF8,CLPTM1,FOXJ1,PRKCZ,PSAP,TNFRSF18,CYP26B1
4_Member	GO Biological Processes	GO:0045580	regulation of T cell differentiation	-2.96119	-0.941966	6/143	25,1209,2302,5590,8784,56603	ABL1,CLPTM1,FOXJ1,PRKCZ,TNFRSF18,CYP26B1
4_Member	GO Biological Processes	GO:0002521	leukocyte differentiation	-2.93992	-0.933076	12/522	25,944,1209,2185,2302,5590,5660,5795,7037,8784,56603,133396	ABL1,TNFSF8,CLPTM1,PTK2B,FOXJ1,PRKCZ,PSAP,PTPRJ,TFRC,TNFRSF18,CYP26B1,IL31RA
4_Member	GO Biological Processes	GO:0050670	regulation of lymphocyte proliferation	-2.7755	-0.811214	7/211	683,944,1026,1947,2302,7037,10457	BST1,TNFSF8,CDKN1A,EFNB1,FOXJ1,TFRC,GPNMB
4_Member	GO Biological Processes	GO:0032944	regulation of mononuclear cell proliferation	-2.75223	-0.793712	7/213	683,944,1026,1947,2302,7037,10457	BST1,TNFSF8,CDKN1A,EFNB1,FOXJ1,TFRC,GPNMB
4_Member	GO Biological Processes	GO:0046651	lymphocyte proliferation	-2.72788	-0.780926	8/276	25,683,944,1026,1947,2302,7037,10457	ABL1,BST1,TNFSF8,CDKN1A,EFNB1,FOXJ1,TFRC,GPNMB
4_Member	GO Biological Processes	GO:0032943	mononuclear cell proliferation	-2.69868	-0.776663	8/279	25,683,944,1026,1947,2302,7037,10457	ABL1,BST1,TNFSF8,CDKN1A,EFNB1,FOXJ1,TFRC,GPNMB
4_Member	GO Biological Processes	GO:0070663	regulation of leukocyte proliferation	-2.60746	-0.725716	7/226	683,944,1026,1947,2302,7037,10457	BST1,TNFSF8,CDKN1A,EFNB1,FOXJ1,TFRC,GPNMB
4_Member	GO Biological Processes	GO:0045619	regulation of lymphocyte differentiation	-2.55537	-0.69753	6/172	25,1209,2302,5590,8784,56603	ABL1,CLPTM1,FOXJ1,PRKCZ,TNFRSF18,CYP26B1
4_Member	GO Biological Processes	GO:0070661	leukocyte proliferation	-2.47907	-0.640983	8/303	25,683,944,1026,1947,2302,7037,10457	ABL1,BST1,TNFSF8,CDKN1A,EFNB1,FOXJ1,TFRC,GPNMB
4_Member	GO Biological Processes	GO:0030890	positive regulation of B cell proliferation	-2.35647	-0.566708	3/41	683,1026,7037	BST1,CDKN1A,TFRC
4_Member	GO Biological Processes	GO:0042098	T cell proliferation	-2.3549	-0.566708	6/189	25,944,1947,2302,7037,10457	ABL1,TNFSF8,EFNB1,FOXJ1,TFRC,GPNMB
4_Member	GO Biological Processes	GO:0022409	positive regulation of cell-cell adhesion	-2.19618	-0.461666	7/269	1947,1948,5590,7037,10076,55083,140885	EFNB1,EFNB2,PRKCZ,TFRC,PTPRU,KIF26B,SIRPA
4_Member	GO Biological Processes	GO:0042100	B cell proliferation	-2.13118	-0.424131	4/95	25,683,1026,7037	ABL1,BST1,CDKN1A,TFRC
4_Member	GO Biological Processes	GO:0007159	leukocyte cell-cell adhesion	-2.11752	-0.418945	8/349	1947,1948,2302,3695,5590,7037,10457,140885	EFNB1,EFNB2,FOXJ1,ITGB7,PRKCZ,TFRC,GPNMB,SIRPA
4_Member	GO Biological Processes	GO:0042129	regulation of T cell proliferation	-2.01104	-0.365348	5/160	944,1947,2302,7037,10457	TNFSF8,EFNB1,FOXJ1,TFRC,GPNMB
5_Summary	GO Biological Processes	GO:0007169	transmembrane receptor protein tyrosine kinase signaling pathway	-5.61916	-2.46074	20/737	25,653,1947,1948,2043,2185,2247,2277,4689,5154,5590,5795,8322,9844,9971,10252,23433,51232,133396,245972,1846,5071,5581,5660,7078,10457,140885,221496,388121,13,80183,158219,1491,4772,8091,8784,10512,50506,131578,154810,1026,3695,79899,683	ABL1,BMP5,EFNB1,EFNB2,EPHA4,PTK2B,FGF2,VEGFD,NCF4,PDGFA,PRKCZ,PTPRJ,FZD4,ELMO1,NR1H4,SPRY1,RHOQ,CRIM1,IL31RA,ATP6V0D2,DUSP4,PRKN,PRKCE,PSAP,TIMP3,GPNMB,SIRPA,LEMD2,TNFAIP8L3,AADAC,RUBCNL,TTC39B,CTH,NFATC1,HMGA2,TNFRSF18,SEMA3C,DUOX2,LRRC15,AMOTL1,CDKN1A,ITGB7,PRR5L,BST1
5_Member	GO Biological Processes	GO:0007169	transmembrane receptor protein tyrosine kinase signaling pathway	-5.61916	-2.46074	20/737	25,653,1947,1948,2043,2185,2247,2277,4689,5154,5590,5795,8322,9844,9971,10252,23433,51232,133396,245972	ABL1,BMP5,EFNB1,EFNB2,EPHA4,PTK2B,FGF2,VEGFD,NCF4,PDGFA,PRKCZ,PTPRJ,FZD4,ELMO1,NR1H4,SPRY1,RHOQ,CRIM1,IL31RA,ATP6V0D2
5_Member	GO Biological Processes	GO:0043408	regulation of MAPK cascade	-4.36749	-1.89211	18/754	25,1846,2043,2185,2247,5071,5154,5581,5590,5660,5795,7078,8322,10252,10457,140885,221496,388121	ABL1,DUSP4,EPHA4,PTK2B,FGF2,PRKN,PDGFA,PRKCE,PRKCZ,PSAP,PTPRJ,TIMP3,FZD4,SPRY1,GPNMB,SIRPA,LEMD2,TNFAIP8L3
5_Member	GO Biological Processes	GO:0070372	regulation of ERK1 and ERK2 cascade	-4.35547	-1.89211	11/308	25,1846,2185,2247,5154,5590,7078,10252,10457,140885,388121	ABL1,DUSP4,PTK2B,FGF2,PDGFA,PRKCZ,TIMP3,SPRY1,GPNMB,SIRPA,TNFAIP8L3
5_Member	GO Biological Processes	GO:0070371	ERK1 and ERK2 cascade	-4.11059	-1.72369	11/328	25,1846,2185,2247,5154,5590,7078,10252,10457,140885,388121	ABL1,DUSP4,PTK2B,FGF2,PDGFA,PRKCZ,TIMP3,SPRY1,GPNMB,SIRPA,TNFAIP8L3
5_Member	GO Biological Processes	GO:0019216	regulation of lipid metabolic process	-3.21661	-1.08868	11/417	13,653,2185,2247,5154,5581,5660,9971,80183,158219,388121	AADAC,BMP5,PTK2B,FGF2,PDGFA,PRKCE,PSAP,NR1H4,RUBCNL,TTC39B,TNFAIP8L3
5_Member	GO Biological Processes	GO:1903727	positive regulation of phospholipid metabolic process	-3.18337	-1.07612	4/49	2185,2247,9971,388121	PTK2B,FGF2,NR1H4,TNFAIP8L3
5_Member	GO Biological Processes	GO:1903725	regulation of phospholipid metabolic process	-3.06458	-1.0109	5/91	2185,2247,5154,9971,388121	PTK2B,FGF2,PDGFA,NR1H4,TNFAIP8L3
5_Member	GO Biological Processes	GO:0045834	positive regulation of lipid metabolic process	-2.88442	-0.888735	6/148	13,2185,2247,5581,9971,388121	AADAC,PTK2B,FGF2,PRKCE,NR1H4,TNFAIP8L3
5_Member	GO Biological Processes	GO:0043410	positive regulation of MAPK cascade	-2.73629	-0.785043	12/552	25,2043,2185,2247,5154,5581,5590,5660,5795,8322,10457,388121	ABL1,EPHA4,PTK2B,FGF2,PDGFA,PRKCE,PRKCZ,PSAP,PTPRJ,FZD4,GPNMB,TNFAIP8L3
5_Member	GO Biological Processes	GO:0070374	positive regulation of ERK1 and ERK2 cascade	-2.68406	-0.769951	7/219	25,2185,2247,5154,5590,10457,388121	ABL1,PTK2B,FGF2,PDGFA,PRKCZ,GPNMB,TNFAIP8L3
5_Member	GO Biological Processes	GO:0043552	positive regulation of phosphatidylinositol 3-kinase activity	-2.62685	-0.740908	3/33	2185,2247,388121	PTK2B,FGF2,TNFAIP8L3
5_Member	GO Biological Processes	GO:1901342	regulation of vasculature development	-2.54093	-0.687477	10/434	25,1491,1948,2185,2247,2277,4772,5154,8091,10457	ABL1,CTH,EFNB2,PTK2B,FGF2,VEGFD,NFATC1,PDGFA,HMGA2,GPNMB
5_Member	GO Biological Processes	GO:2000147	positive regulation of cell motility	-2.53627	-0.684766	12/584	25,2185,2247,2277,5154,5581,8784,10457,10512,50506,131578,154810	ABL1,PTK2B,FGF2,VEGFD,PDGFA,PRKCE,TNFRSF18,GPNMB,SEMA3C,DUOX2,LRRC15,AMOTL1
5_Member	GO Biological Processes	GO:1904018	positive regulation of vasculature development	-2.53385	-0.68429	7/233	25,1491,1948,2185,2247,2277,8091	ABL1,CTH,EFNB2,PTK2B,FGF2,VEGFD,HMGA2
5_Member	GO Biological Processes	GO:0090218	positive regulation of lipid kinase activity	-2.48356	-0.64359	3/37	2185,2247,388121	PTK2B,FGF2,TNFAIP8L3
5_Member	GO Biological Processes	GO:0051272	positive regulation of cellular component movement	-2.43657	-0.607827	12/601	25,2185,2247,2277,5154,5581,8784,10457,10512,50506,131578,154810	ABL1,PTK2B,FGF2,VEGFD,PDGFA,PRKCE,TNFRSF18,GPNMB,SEMA3C,DUOX2,LRRC15,AMOTL1
5_Member	GO Biological Processes	GO:0071900	regulation of protein serine/threonine kinase activity	-2.41073	-0.598308	11/528	25,1026,1846,2043,2185,2247,5154,5795,8091,8322,10252	ABL1,CDKN1A,DUSP4,EPHA4,PTK2B,FGF2,PDGFA,PTPRJ,HMGA2,FZD4,SPRY1
5_Member	GO Biological Processes	GO:0040017	positive regulation of locomotion	-2.37432	-0.575906	12/612	25,2185,2247,2277,5154,5581,8784,10457,10512,50506,131578,154810	ABL1,PTK2B,FGF2,VEGFD,PDGFA,PRKCE,TNFRSF18,GPNMB,SEMA3C,DUOX2,LRRC15,AMOTL1
5_Member	GO Biological Processes	GO:0001667	ameboidal-type cell migration	-2.28609	-0.519251	10/472	25,1947,1948,2185,2247,3695,5581,10512,79899,154810	ABL1,EFNB1,EFNB2,PTK2B,FGF2,ITGB7,PRKCE,SEMA3C,PRR5L,AMOTL1
5_Member	GO Biological Processes	GO:0030335	positive regulation of cell migration	-2.22292	-0.478534	11/560	25,2185,2247,2277,5154,5581,8784,10457,10512,131578,154810	ABL1,PTK2B,FGF2,VEGFD,PDGFA,PRKCE,TNFRSF18,GPNMB,SEMA3C,LRRC15,AMOTL1
5_Member	GO Biological Processes	GO:0043405	regulation of MAP kinase activity	-2.15354	-0.433737	8/344	1846,2043,2185,2247,5154,5795,8322,10252	DUSP4,EPHA4,PTK2B,FGF2,PDGFA,PTPRJ,FZD4,SPRY1
5_Member	GO Biological Processes	GO:0050920	regulation of chemotaxis	-2.04251	-0.385522	6/220	683,1948,2185,2247,2277,10512	BST1,EFNB2,PTK2B,FGF2,VEGFD,SEMA3C
6_Summary	GO Biological Processes	GO:0001655	urogenital system development	-5.51079	-2.39016	13/330	1948,2043,2099,2247,2302,4774,5154,5660,8842,10252,25937,55083,56603	EFNB2,EPHA4,ESR1,FGF2,FOXJ1,NFIA,PDGFA,PSAP,PROM1,SPRY1,WWTR1,KIF26B,CYP26B1
6_Member	GO Biological Processes	GO:0001655	urogenital system development	-5.51079	-2.39016	13/330	1948,2043,2099,2247,2302,4774,5154,5660,8842,10252,25937,55083,56603	EFNB2,EPHA4,ESR1,FGF2,FOXJ1,NFIA,PDGFA,PSAP,PROM1,SPRY1,WWTR1,KIF26B,CYP26B1
6_Member	GO Biological Processes	GO:0072073	kidney epithelium development	-4.68269	-2.01561	8/142	1948,2043,2247,2302,8842,10252,25937,55083	EFNB2,EPHA4,FGF2,FOXJ1,PROM1,SPRY1,WWTR1,KIF26B
6_Member	GO Biological Processes	GO:0072001	renal system development	-4.56624	-1.9962	11/292	1948,2043,2247,2302,4774,5154,8842,10252,25937,55083,56603	EFNB2,EPHA4,FGF2,FOXJ1,NFIA,PDGFA,PROM1,SPRY1,WWTR1,KIF26B,CYP26B1
6_Member	GO Biological Processes	GO:0001822	kidney development	-3.96963	-1.6095	10/283	1948,2043,2247,2302,5154,8842,10252,25937,55083,56603	EFNB2,EPHA4,FGF2,FOXJ1,PDGFA,PROM1,SPRY1,WWTR1,KIF26B,CYP26B1
6_Member	GO Biological Processes	GO:0001656	metanephros development	-3.06458	-1.0109	5/91	2302,5154,10252,25937,55083	FOXJ1,PDGFA,SPRY1,WWTR1,KIF26B
6_Member	GO Biological Processes	GO:0072006	nephron development	-2.94558	-0.933076	6/144	2247,2302,5154,8842,25937,55083	FGF2,FOXJ1,PDGFA,PROM1,WWTR1,KIF26B
6_Member	GO Biological Processes	GO:0032835	glomerulus development	-2.72236	-0.780229	4/65	2302,5154,8842,25937	FOXJ1,PDGFA,PROM1,WWTR1
6_Member	GO Biological Processes	GO:0072009	nephron epithelium development	-2.69772	-0.776663	5/110	2247,2302,8842,25937,55083	FGF2,FOXJ1,PROM1,WWTR1,KIF26B
6_Member	GO Biological Processes	GO:0035850	epithelial cell differentiation involved in kidney development	-2.18965	-0.456707	3/47	2302,8842,25937	FOXJ1,PROM1,WWTR1
6_Member	GO Biological Processes	GO:0072080	nephron tubule development	-2.16336	-0.440099	4/93	2247,8842,25937,55083	FGF2,PROM1,WWTR1,KIF26B
6_Member	GO Biological Processes	GO:0060993	kidney morphogenesis	-2.13118	-0.424131	4/95	2247,2302,25937,55083	FGF2,FOXJ1,WWTR1,KIF26B
6_Member	GO Biological Processes	GO:0061326	renal tubule development	-2.13118	-0.424131	4/95	2247,8842,25937,55083	FGF2,PROM1,WWTR1,KIF26B
6_Member	GO Biological Processes	GO:0001657	ureteric bud development	-2.08439	-0.40309	4/98	2247,2302,10252,55083	FGF2,FOXJ1,SPRY1,KIF26B
6_Member	GO Biological Processes	GO:0072163	mesonephric epithelium development	-2.06916	-0.396239	4/99	2247,2302,10252,55083	FGF2,FOXJ1,SPRY1,KIF26B
6_Member	GO Biological Processes	GO:0072164	mesonephric tubule development	-2.06916	-0.396239	4/99	2247,2302,10252,55083	FGF2,FOXJ1,SPRY1,KIF26B
6_Member	GO Biological Processes	GO:0001823	mesonephros development	-2.01006	-0.365348	4/103	2247,2302,10252,55083	FGF2,FOXJ1,SPRY1,KIF26B
7_Summary	GO Biological Processes	GO:0010720	positive regulation of cell development	-5.41261	-2.34532	17/567	25,653,1272,2043,2119,2185,2290,2909,4124,4747,5071,5270,8322,10512,55607,55679,57165,9746,2059,6624,23433,43,5660,7399,8842,56603,63976	ABL1,BMP5,CNTN1,EPHA4,ETV5,PTK2B,FOXG1,ARHGAP35,MAN2A1,NEFL,PRKN,SERPINE2,FZD4,SEMA3C,PPP1R9A,LIMS2,GJC2,CLSTN3,EPS8,FSCN1,RHOQ,ACHE,PSAP,USH2A,PROM1,CYP26B1,PRDM16
7_Member	GO Biological Processes	GO:0010720	positive regulation of cell development	-5.41261	-2.34532	17/567	25,653,1272,2043,2119,2185,2290,2909,4124,4747,5071,5270,8322,10512,55607,55679,57165	ABL1,BMP5,CNTN1,EPHA4,ETV5,PTK2B,FOXG1,ARHGAP35,MAN2A1,NEFL,PRKN,SERPINE2,FZD4,SEMA3C,PPP1R9A,LIMS2,GJC2
7_Member	GO Biological Processes	GO:0050769	positive regulation of neurogenesis	-4.37819	-1.89211	14/484	653,1272,2043,2119,2185,2290,2909,4124,4747,5071,5270,8322,55607,57165	BMP5,CNTN1,EPHA4,ETV5,PTK2B,FOXG1,ARHGAP35,MAN2A1,NEFL,PRKN,SERPINE2,FZD4,PPP1R9A,GJC2
7_Member	GO Biological Processes	GO:0051962	positive regulation of nervous system development	-4.34374	-1.89211	15/552	653,1272,2043,2119,2185,2290,2909,4124,4747,5071,5270,8322,9746,55607,57165	BMP5,CNTN1,EPHA4,ETV5,PTK2B,FOXG1,ARHGAP35,MAN2A1,NEFL,PRKN,SERPINE2,FZD4,CLSTN3,PPP1R9A,GJC2
7_Member	GO Biological Processes	GO:0031346	positive regulation of cell projection organization	-4.04692	-1.67962	12/393	653,1272,2043,2059,2185,2909,4747,5071,6624,8322,23433,55607	BMP5,CNTN1,EPHA4,EPS8,PTK2B,ARHGAP35,NEFL,PRKN,FSCN1,FZD4,RHOQ,PPP1R9A
7_Member	GO Biological Processes	GO:0045666	positive regulation of neuron differentiation	-3.55454	-1.34596	11/380	653,1272,2043,2119,2185,2290,2909,4747,5071,8322,55607	BMP5,CNTN1,EPHA4,ETV5,PTK2B,FOXG1,ARHGAP35,NEFL,PRKN,FZD4,PPP1R9A
7_Member	GO Biological Processes	GO:0010976	positive regulation of neuron projection development	-3.20481	-1.08418	9/291	653,1272,2043,2185,2909,4747,5071,8322,55607	BMP5,CNTN1,EPHA4,PTK2B,ARHGAP35,NEFL,PRKN,FZD4,PPP1R9A
7_Member	GO Biological Processes	GO:0007423	sensory organ development	-2.72329	-0.780229	12/554	43,653,2043,2290,2909,4124,5660,7399,8322,8842,56603,63976	ACHE,BMP5,EPHA4,FOXG1,ARHGAP35,MAN2A1,PSAP,USH2A,FZD4,PROM1,CYP26B1,PRDM16
8_Summary	GO Biological Processes	GO:0021954	central nervous system neuron development	-5.34101	-2.34532	7/82	2043,2290,2909,4781,9201,26468,166614,5081,5660,25,2119,2185,4147,5270,7223,57165	EPHA4,FOXG1,ARHGAP35,NFIB,DCLK1,LHX6,DCLK2,PAX7,PSAP,ABL1,ETV5,PTK2B,MATN2,SERPINE2,TRPC4,GJC2
8_Member	GO Biological Processes	GO:0021954	central nervous system neuron development	-5.34101	-2.34532	7/82	2043,2290,2909,4781,9201,26468,166614	EPHA4,FOXG1,ARHGAP35,NFIB,DCLK1,LHX6,DCLK2
8_Member	GO Biological Processes	GO:0021953	central nervous system neuron differentiation	-4.56254	-1.9962	9/192	2043,2290,2909,4781,5081,5660,9201,26468,166614	EPHA4,FOXG1,ARHGAP35,NFIB,PAX7,PSAP,DCLK1,LHX6,DCLK2
8_Member	GO Biological Processes	GO:0021955	central nervous system neuron axonogenesis	-3.75222	-1.46044	4/35	2043,2909,4781,9201	EPHA4,ARHGAP35,NFIB,DCLK1
8_Member	GO Biological Processes	GO:0042063	gliogenesis	-3.75177	-1.46044	10/301	25,2043,2119,2185,2290,4147,4781,5270,7223,57165	ABL1,EPHA4,ETV5,PTK2B,FOXG1,MATN2,NFIB,SERPINE2,TRPC4,GJC2
8_Member	GO Biological Processes	GO:0021952	central nervous system projection neuron axonogenesis	-2.98143	-0.954804	3/25	2043,4781,9201	EPHA4,NFIB,DCLK1
8_Member	GO Biological Processes	GO:0008038	neuron recognition	-2.11496	-0.418945	3/50	2043,2290,2909	EPHA4,FOXG1,ARHGAP35
8_Member	GO Biological Processes	GO:0008347	glial cell migration	-2.04517	-0.386104	3/53	2043,2290,4147	EPHA4,FOXG1,MATN2
9_Summary	GO Biological Processes	GO:0030902	hindbrain development	-5.28553	-2.31617	9/156	25,653,1272,4781,5270,5660,6532,8322,8455,2290,2302,2909,4747,9201,26468,57165,85458,166614,9543,5071,944,5590	ABL1,BMP5,CNTN1,NFIB,SERPINE2,PSAP,SLC6A4,FZD4,ATRN,FOXG1,FOXJ1,ARHGAP35,NEFL,DCLK1,LHX6,GJC2,DIXDC1,DCLK2,IGDCC3,PRKN,TNFSF8,PRKCZ
9_Member	GO Biological Processes	GO:0030902	hindbrain development	-5.28553	-2.31617	9/156	25,653,1272,4781,5270,5660,6532,8322,8455	ABL1,BMP5,CNTN1,NFIB,SERPINE2,PSAP,SLC6A4,FZD4,ATRN
9_Member	GO Biological Processes	GO:0007420	brain development	-4.46527	-1.93756	18/741	25,653,1272,2290,2302,2909,4747,4781,5270,5660,6532,8322,8455,9201,26468,57165,85458,166614	ABL1,BMP5,CNTN1,FOXG1,FOXJ1,ARHGAP35,NEFL,NFIB,SERPINE2,PSAP,SLC6A4,FZD4,ATRN,DCLK1,LHX6,GJC2,DIXDC1,DCLK2
9_Member	GO Biological Processes	GO:0060322	head development	-4.15078	-1.75031	18/784	25,653,1272,2290,2302,2909,4747,4781,5270,5660,6532,8322,8455,9201,26468,57165,85458,166614	ABL1,BMP5,CNTN1,FOXG1,FOXJ1,ARHGAP35,NEFL,NFIB,SERPINE2,PSAP,SLC6A4,FZD4,ATRN,DCLK1,LHX6,GJC2,DIXDC1,DCLK2
9_Member	GO Biological Processes	GO:0021549	cerebellum development	-3.67356	-1.40876	6/105	25,1272,5270,5660,8322,8455	ABL1,CNTN1,SERPINE2,PSAP,FZD4,ATRN
9_Member	GO Biological Processes	GO:0022037	metencephalon development	-3.48018	-1.28159	6/114	25,1272,5270,5660,8322,8455	ABL1,CNTN1,SERPINE2,PSAP,FZD4,ATRN
9_Member	GO Biological Processes	GO:0050885	neuromuscular process controlling balance	-3.11713	-1.03127	4/51	25,4747,5660,9543	ABL1,NEFL,PSAP,IGDCC3
9_Member	GO Biological Processes	GO:0050905	neuromuscular process	-2.75048	-0.793712	5/107	25,4747,5071,5660,9543	ABL1,NEFL,PRKN,PSAP,IGDCC3
9_Member	GO Biological Processes	GO:0021587	cerebellum morphogenesis	-2.38691	-0.585043	3/40	25,5270,5660	ABL1,SERPINE2,PSAP
9_Member	GO Biological Processes	GO:0021575	hindbrain morphogenesis	-2.26988	-0.509406	3/44	25,5270,5660	ABL1,SERPINE2,PSAP
9_Member	GO Biological Processes	GO:0046632	alpha-beta T cell differentiation	-2.02458	-0.37369	4/102	25,944,5590,5660	ABL1,TNFSF8,PRKCZ,PSAP
10_Summary	GO Biological Processes	GO:0007268	chemical synaptic transmission	-5.18838	-2.2896	19/720	25,43,2043,2119,2185,3350,5071,5270,5581,5590,6532,9145,9228,9229,9746,22986,55607,84446,148281,1948,4747,4774	ABL1,ACHE,EPHA4,ETV5,PTK2B,HTR1A,PRKN,SERPINE2,PRKCE,PRKCZ,SLC6A4,SYNGR1,DLGAP2,DLGAP1,CLSTN3,SORCS3,PPP1R9A,BRSK1,SYT6,EFNB2,NEFL,NFIA
10_Member	GO Biological Processes	GO:0007268	chemical synaptic transmission	-5.18838	-2.2896	19/720	25,43,2043,2119,2185,3350,5071,5270,5581,5590,6532,9145,9228,9229,9746,22986,55607,84446,148281	ABL1,ACHE,EPHA4,ETV5,PTK2B,HTR1A,PRKN,SERPINE2,PRKCE,PRKCZ,SLC6A4,SYNGR1,DLGAP2,DLGAP1,CLSTN3,SORCS3,PPP1R9A,BRSK1,SYT6
10_Member	GO Biological Processes	GO:0098916	anterograde trans-synaptic signaling	-5.18838	-2.2896	19/720	25,43,2043,2119,2185,3350,5071,5270,5581,5590,6532,9145,9228,9229,9746,22986,55607,84446,148281	ABL1,ACHE,EPHA4,ETV5,PTK2B,HTR1A,PRKN,SERPINE2,PRKCE,PRKCZ,SLC6A4,SYNGR1,DLGAP2,DLGAP1,CLSTN3,SORCS3,PPP1R9A,BRSK1,SYT6
10_Member	GO Biological Processes	GO:0099537	trans-synaptic signaling	-5.12049	-2.28381	19/728	25,43,2043,2119,2185,3350,5071,5270,5581,5590,6532,9145,9228,9229,9746,22986,55607,84446,148281	ABL1,ACHE,EPHA4,ETV5,PTK2B,HTR1A,PRKN,SERPINE2,PRKCE,PRKCZ,SLC6A4,SYNGR1,DLGAP2,DLGAP1,CLSTN3,SORCS3,PPP1R9A,BRSK1,SYT6
10_Member	GO Biological Processes	GO:0099536	synaptic signaling	-5.07858	-2.28367	19/733	25,43,2043,2119,2185,3350,5071,5270,5581,5590,6532,9145,9228,9229,9746,22986,55607,84446,148281	ABL1,ACHE,EPHA4,ETV5,PTK2B,HTR1A,PRKN,SERPINE2,PRKCE,PRKCZ,SLC6A4,SYNGR1,DLGAP2,DLGAP1,CLSTN3,SORCS3,PPP1R9A,BRSK1,SYT6
10_Member	GO Biological Processes	GO:0050804	modulation of chemical synaptic transmission	-4.72367	-2.03173	14/450	25,43,2043,2185,5071,5270,5581,5590,6532,9145,9746,22986,55607,84446	ABL1,ACHE,EPHA4,PTK2B,PRKN,SERPINE2,PRKCE,PRKCZ,SLC6A4,SYNGR1,CLSTN3,SORCS3,PPP1R9A,BRSK1
10_Member	GO Biological Processes	GO:0099177	regulation of trans-synaptic signaling	-4.71303	-2.03173	14/451	25,43,2043,2185,5071,5270,5581,5590,6532,9145,9746,22986,55607,84446	ABL1,ACHE,EPHA4,PTK2B,PRKN,SERPINE2,PRKCE,PRKCZ,SLC6A4,SYNGR1,CLSTN3,SORCS3,PPP1R9A,BRSK1
10_Member	GO Biological Processes	GO:0048167	regulation of synaptic plasticity	-4.61643	-1.99781	9/189	25,2043,2185,5270,5590,9145,22986,55607,84446	ABL1,EPHA4,PTK2B,SERPINE2,PRKCZ,SYNGR1,SORCS3,PPP1R9A,BRSK1
10_Member	GO Biological Processes	GO:0050805	negative regulation of synaptic transmission	-4.33002	-1.88608	6/80	43,2185,5071,6532,22986,55607	ACHE,PTK2B,PRKN,SLC6A4,SORCS3,PPP1R9A
10_Member	GO Biological Processes	GO:0050806	positive regulation of synaptic transmission	-4.2358	-1.80684	8/164	25,2043,2185,5270,5581,5590,9746,55607	ABL1,EPHA4,PTK2B,SERPINE2,PRKCE,PRKCZ,CLSTN3,PPP1R9A
10_Member	GO Biological Processes	GO:0060291	long-term synaptic potentiation	-4.18152	-1.77284	6/85	25,2043,2185,5270,5590,55607	ABL1,EPHA4,PTK2B,SERPINE2,PRKCZ,PPP1R9A
10_Member	GO Biological Processes	GO:1900272	negative regulation of long-term synaptic potentiation	-3.85582	-1.52524	3/13	25,2043,55607	ABL1,EPHA4,PPP1R9A
10_Member	GO Biological Processes	GO:0060292	long-term synaptic depression	-2.70586	-0.776663	3/31	2185,22986,55607	PTK2B,SORCS3,PPP1R9A
10_Member	GO Biological Processes	GO:1900271	regulation of long-term synaptic potentiation	-2.21574	-0.476829	3/46	25,2043,55607	ABL1,EPHA4,PPP1R9A
10_Member	GO Biological Processes	GO:0050808	synapse organization	-2.06713	-0.396239	9/431	25,43,1948,2043,2119,4747,4774,9746,55607	ABL1,ACHE,EFNB2,EPHA4,ETV5,NEFL,NFIA,CLSTN3,PPP1R9A
11_Summary	GO Biological Processes	GO:1903035	negative regulation of response to wounding	-5.1034	-2.28381	7/89	1026,2043,2247,5154,5270,5627,6696,5581,50506,2162,2909,4147,4747,5081,5738,10077,9971,10512,79102,140885,2099	CDKN1A,EPHA4,FGF2,PDGFA,SERPINE2,PROS1,SPP1,PRKCE,DUOX2,F13A1,ARHGAP35,MATN2,NEFL,PAX7,PTGFRN,TSPAN32,NR1H4,SEMA3C,RNF26,SIRPA,ESR1
11_Member	GO Biological Processes	GO:1903035	negative regulation of response to wounding	-5.1034	-2.28381	7/89	1026,2043,2247,5154,5270,5627,6696	CDKN1A,EPHA4,FGF2,PDGFA,SERPINE2,PROS1,SPP1
11_Member	GO Biological Processes	GO:1903034	regulation of response to wounding	-4.67135	-2.01561	9/186	1026,2043,2247,5154,5270,5581,5627,6696,50506	CDKN1A,EPHA4,FGF2,PDGFA,SERPINE2,PRKCE,PROS1,SPP1,DUOX2
11_Member	GO Biological Processes	GO:0009611	response to wounding	-3.78615	-1.47844	16/691	1026,2043,2162,2247,2909,4147,4747,5081,5154,5270,5581,5627,5738,6696,10077,50506	CDKN1A,EPHA4,F13A1,FGF2,ARHGAP35,MATN2,NEFL,PAX7,PDGFA,SERPINE2,PRKCE,PROS1,PTGFRN,SPP1,TSPAN32,DUOX2
11_Member	GO Biological Processes	GO:0032102	negative regulation of response to external stimulus	-3.5937	-1.37616	11/376	1026,2043,2247,5154,5270,5627,6696,9971,10512,79102,140885	CDKN1A,EPHA4,FGF2,PDGFA,SERPINE2,PROS1,SPP1,NR1H4,SEMA3C,RNF26,SIRPA
11_Member	GO Biological Processes	GO:0061041	regulation of wound healing	-3.58262	-1.36958	7/154	1026,2247,5154,5270,5581,5627,50506	CDKN1A,FGF2,PDGFA,SERPINE2,PRKCE,PROS1,DUOX2
11_Member	GO Biological Processes	GO:0061045	negative regulation of wound healing	-3.47708	-1.28159	5/74	1026,2247,5154,5270,5627	CDKN1A,FGF2,PDGFA,SERPINE2,PROS1
11_Member	GO Biological Processes	GO:0042060	wound healing	-2.58472	-0.711246	12/576	1026,2162,2247,2909,5081,5154,5270,5581,5627,5738,10077,50506	CDKN1A,F13A1,FGF2,ARHGAP35,PAX7,PDGFA,SERPINE2,PRKCE,PROS1,PTGFRN,TSPAN32,DUOX2
11_Member	GO Biological Processes	GO:0030195	negative regulation of blood coagulation	-2.13929	-0.425903	3/49	5154,5270,5627	PDGFA,SERPINE2,PROS1
11_Member	GO Biological Processes	GO:0048146	positive regulation of fibroblast proliferation	-2.11496	-0.418945	3/50	1026,2099,5154	CDKN1A,ESR1,PDGFA
11_Member	GO Biological Processes	GO:1900047	negative regulation of hemostasis	-2.11496	-0.418945	3/50	5154,5270,5627	PDGFA,SERPINE2,PROS1
11_Member	GO Biological Processes	GO:0050819	negative regulation of coagulation	-2.04517	-0.386104	3/53	5154,5270,5627	PDGFA,SERPINE2,PROS1
12_Summary	GO Biological Processes	GO:0050730	regulation of peptidyl-tyrosine phosphorylation	-5.04989	-2.28144	11/259	25,683,1272,2043,2185,5154,5581,5590,5795,8784,133396,2199,55679,8322,3695,10077,1948,6624,9971,59272	ABL1,BST1,CNTN1,EPHA4,PTK2B,PDGFA,PRKCE,PRKCZ,PTPRJ,TNFRSF18,IL31RA,FBLN2,LIMS2,FZD4,ITGB7,TSPAN32,EFNB2,FSCN1,NR1H4,ACE2
12_Member	GO Biological Processes	GO:0050730	regulation of peptidyl-tyrosine phosphorylation	-5.04989	-2.28144	11/259	25,683,1272,2043,2185,5154,5581,5590,5795,8784,133396	ABL1,BST1,CNTN1,EPHA4,PTK2B,PDGFA,PRKCE,PRKCZ,PTPRJ,TNFRSF18,IL31RA
12_Member	GO Biological Processes	GO:0010811	positive regulation of cell-substrate adhesion	-4.25851	-1.82212	7/120	25,2185,2199,5581,5590,5795,55679	ABL1,PTK2B,FBLN2,PRKCE,PRKCZ,PTPRJ,LIMS2
12_Member	GO Biological Processes	GO:0010810	regulation of cell-substrate adhesion	-4.18025	-1.77284	9/215	25,683,2185,2199,5581,5590,5795,8322,55679	ABL1,BST1,PTK2B,FBLN2,PRKCE,PRKCZ,PTPRJ,FZD4,LIMS2
12_Member	GO Biological Processes	GO:0018108	peptidyl-tyrosine phosphorylation	-3.64343	-1.40266	11/371	25,683,1272,2043,2185,5154,5581,5590,5795,8784,133396	ABL1,BST1,CNTN1,EPHA4,PTK2B,PDGFA,PRKCE,PRKCZ,PTPRJ,TNFRSF18,IL31RA
12_Member	GO Biological Processes	GO:0007229	integrin-mediated signaling pathway	-3.62897	-1.39752	6/107	25,683,2185,3695,10077,55679	ABL1,BST1,PTK2B,ITGB7,TSPAN32,LIMS2
12_Member	GO Biological Processes	GO:0018212	peptidyl-tyrosine modification	-3.61349	-1.3914	11/374	25,683,1272,2043,2185,5154,5581,5590,5795,8784,133396	ABL1,BST1,CNTN1,EPHA4,PTK2B,PDGFA,PRKCE,PRKCZ,PTPRJ,TNFRSF18,IL31RA
12_Member	GO Biological Processes	GO:0031589	cell-substrate adhesion	-3.20612	-1.08418	10/353	25,683,2185,2199,3695,5581,5590,5795,8322,55679	ABL1,BST1,PTK2B,FBLN2,ITGB7,PRKCE,PRKCZ,PTPRJ,FZD4,LIMS2
12_Member	GO Biological Processes	GO:0034330	cell junction organization	-3.12118	-1.03196	9/299	25,1948,2043,2185,5795,6624,9971,55679,59272	ABL1,EFNB2,EPHA4,PTK2B,PTPRJ,FSCN1,NR1H4,LIMS2,ACE2
12_Member	GO Biological Processes	GO:0001954	positive regulation of cell-matrix adhesion	-3.05374	-1.00622	4/53	25,2185,5590,5795	ABL1,PTK2B,PRKCZ,PTPRJ
12_Member	GO Biological Processes	GO:0050731	positive regulation of peptidyl-tyrosine phosphorylation	-2.98515	-0.955597	7/194	25,1272,2043,2185,5795,8784,133396	ABL1,CNTN1,EPHA4,PTK2B,PTPRJ,TNFRSF18,IL31RA
12_Member	GO Biological Processes	GO:1901890	positive regulation of cell junction assembly	-2.51772	-0.670096	3/36	25,5795,59272	ABL1,PTPRJ,ACE2
12_Member	GO Biological Processes	GO:0001952	regulation of cell-matrix adhesion	-2.4873	-0.645423	5/123	25,683,2185,5590,5795	ABL1,BST1,PTK2B,PRKCZ,PTPRJ
12_Member	GO Biological Processes	GO:0034329	cell junction assembly	-2.39487	-0.589165	7/247	25,2185,5795,6624,9971,55679,59272	ABL1,PTK2B,PTPRJ,FSCN1,NR1H4,LIMS2,ACE2
12_Member	GO Biological Processes	GO:0034332	adherens junction organization	-2.1492	-0.430835	5/148	25,1948,2043,2185,5795	ABL1,EFNB2,EPHA4,PTK2B,PTPRJ
12_Member	GO Biological Processes	GO:0034446	substrate adhesion-dependent cell spreading	-2.08439	-0.40309	4/98	25,3695,8322,55679	ABL1,ITGB7,FZD4,LIMS2
13_Summary	GO Biological Processes	GO:0002576	platelet degranulation	-5.01136	-2.25871	8/128	2162,2277,5099,5154,5627,5660,7078,9749,683,5795,8836,9145,10970,22841,140885,148281	F13A1,VEGFD,PCDH7,PDGFA,PROS1,PSAP,TIMP3,PHACTR2,BST1,PTPRJ,GGH,SYNGR1,CKAP4,RAB11FIP2,SIRPA,SYT6
13_Member	GO Biological Processes	GO:0002576	platelet degranulation	-5.01136	-2.25871	8/128	2162,2277,5099,5154,5627,5660,7078,9749	F13A1,VEGFD,PCDH7,PDGFA,PROS1,PSAP,TIMP3,PHACTR2
13_Member	GO Biological Processes	GO:0045055	regulated exocytosis	-3.11366	-1.03112	16/796	683,2162,2277,5099,5154,5627,5660,5795,7078,8836,9145,9749,10970,22841,140885,148281	BST1,F13A1,VEGFD,PCDH7,PDGFA,PROS1,PSAP,PTPRJ,TIMP3,GGH,SYNGR1,PHACTR2,CKAP4,RAB11FIP2,SIRPA,SYT6
14_Summary	GO Biological Processes	GO:0048729	tissue morphogenesis	-4.95855	-2.22114	18/680	25,653,1948,2043,2099,2119,2247,2909,4147,5081,5154,6262,8091,8322,10252,10512,55083,84446,5590	ABL1,BMP5,EFNB2,EPHA4,ESR1,ETV5,FGF2,ARHGAP35,MATN2,PAX7,PDGFA,RYR2,HMGA2,FZD4,SPRY1,SEMA3C,KIF26B,BRSK1,PRKCZ
14_Member	GO Biological Processes	GO:0048729	tissue morphogenesis	-4.95855	-2.22114	18/680	25,653,1948,2043,2099,2119,2247,2909,4147,5081,5154,6262,8091,8322,10252,10512,55083,84446	ABL1,BMP5,EFNB2,EPHA4,ESR1,ETV5,FGF2,ARHGAP35,MATN2,PAX7,PDGFA,RYR2,HMGA2,FZD4,SPRY1,SEMA3C,KIF26B,BRSK1
14_Member	GO Biological Processes	GO:0002009	morphogenesis of an epithelium	-4.35265	-1.89211	15/551	25,653,1948,2043,2099,2119,2247,2909,5154,6262,8322,10252,10512,55083,84446	ABL1,BMP5,EFNB2,EPHA4,ESR1,ETV5,FGF2,ARHGAP35,PDGFA,RYR2,FZD4,SPRY1,SEMA3C,KIF26B,BRSK1
14_Member	GO Biological Processes	GO:0060562	epithelial tube morphogenesis	-4.12238	-1.72875	11/327	25,653,1948,2043,2099,2119,2247,2909,6262,10252,55083	ABL1,BMP5,EFNB2,EPHA4,ESR1,ETV5,FGF2,ARHGAP35,RYR2,SPRY1,KIF26B
14_Member	GO Biological Processes	GO:0061138	morphogenesis of a branching epithelium	-3.13336	-1.04076	7/183	25,2099,2119,2247,5154,10252,10512	ABL1,ESR1,ETV5,FGF2,PDGFA,SPRY1,SEMA3C
14_Member	GO Biological Processes	GO:0060688	regulation of morphogenesis of a branching structure	-2.9635	-0.941966	4/56	25,2099,2119,5154	ABL1,ESR1,ETV5,PDGFA
14_Member	GO Biological Processes	GO:0001763	morphogenesis of a branching structure	-2.92117	-0.917261	7/199	25,2099,2119,2247,5154,10252,10512	ABL1,ESR1,ETV5,FGF2,PDGFA,SPRY1,SEMA3C
14_Member	GO Biological Processes	GO:0010517	regulation of phospholipase activity	-2.58175	-0.710316	4/71	25,2099,2247,5590	ABL1,ESR1,FGF2,PRKCZ
14_Member	GO Biological Processes	GO:1900274	regulation of phospholipase C activity	-2.21574	-0.476829	3/46	25,2099,2247	ABL1,ESR1,FGF2
14_Member	GO Biological Processes	GO:0048754	branching morphogenesis of an epithelial tube	-2.11338	-0.418722	5/151	25,2099,2119,2247,10252	ABL1,ESR1,ETV5,FGF2,SPRY1
14_Member	GO Biological Processes	GO:0060191	regulation of lipase activity	-2.06916	-0.396239	4/99	25,2099,2247,5590	ABL1,ESR1,FGF2,PRKCZ
15_Summary	GO Biological Processes	GO:0006979	response to oxidative stress	-4.63936	-2.00775	14/458	25,2034,2119,2185,4689,5071,5660,8455,8614,8807,50506,51314,79899,140885,1026,2059,4747,5581,6532,8836,55607,57165,683,911,1773,5590,5795,7037,9145,10970,360,2354,6262,148281,8091,10077,133396	ABL1,EPAS1,ETV5,PTK2B,NCF4,PRKN,PSAP,ATRN,STC2,IL18RAP,DUOX2,NME8,PRR5L,SIRPA,CDKN1A,EPS8,NEFL,PRKCE,SLC6A4,GGH,PPP1R9A,GJC2,BST1,CD1C,DNASE1,PRKCZ,PTPRJ,TFRC,SYNGR1,CKAP4,AQP3,FOSB,RYR2,SYT6,HMGA2,TSPAN32,IL31RA
15_Member	GO Biological Processes	GO:0006979	response to oxidative stress	-4.63936	-2.00775	14/458	25,2034,2119,2185,4689,5071,5660,8455,8614,8807,50506,51314,79899,140885	ABL1,EPAS1,ETV5,PTK2B,NCF4,PRKN,PSAP,ATRN,STC2,IL18RAP,DUOX2,NME8,PRR5L,SIRPA
15_Member	GO Biological Processes	GO:0009636	response to toxic substance	-4.51691	-1.97031	15/533	25,1026,2059,2185,4747,5071,5581,5660,6532,8807,8836,50506,55607,57165,140885	ABL1,CDKN1A,EPS8,PTK2B,NEFL,PRKN,PRKCE,PSAP,SLC6A4,IL18RAP,GGH,DUOX2,PPP1R9A,GJC2,SIRPA
15_Member	GO Biological Processes	GO:0034599	cellular response to oxidative stress	-3.66018	-1.40486	10/309	25,2034,2119,4689,5071,5660,8807,51314,79899,140885	ABL1,EPAS1,ETV5,NCF4,PRKN,PSAP,IL18RAP,NME8,PRR5L,SIRPA
15_Member	GO Biological Processes	GO:0097237	cellular response to toxic substance	-2.98851	-0.956019	8/251	25,5071,5581,5660,8807,50506,55607,140885	ABL1,PRKN,PRKCE,PSAP,IL18RAP,DUOX2,PPP1R9A,SIRPA
15_Member	GO Biological Processes	GO:0046677	response to antibiotic	-2.81387	-0.836774	9/331	25,2059,2185,4747,5581,5660,8807,8836,140885	ABL1,EPS8,PTK2B,NEFL,PRKCE,PSAP,IL18RAP,GGH,SIRPA
15_Member	GO Biological Processes	GO:0002366	leukocyte activation involved in immune response	-2.70424	-0.776663	14/711	25,683,911,1773,2185,5581,5590,5660,5795,7037,8836,9145,10970,140885	ABL1,BST1,CD1C,DNASE1,PTK2B,PRKCE,PRKCZ,PSAP,PTPRJ,TFRC,GGH,SYNGR1,CKAP4,SIRPA
15_Member	GO Biological Processes	GO:0002263	cell activation involved in immune response	-2.68196	-0.769951	14/715	25,683,911,1773,2185,5581,5590,5660,5795,7037,8836,9145,10970,140885	ABL1,BST1,CD1C,DNASE1,PTK2B,PRKCE,PRKCZ,PSAP,PTPRJ,TFRC,GGH,SYNGR1,CKAP4,SIRPA
15_Member	GO Biological Processes	GO:0010035	response to inorganic substance	-2.65931	-0.762695	12/564	25,360,2185,2354,4747,5071,5660,6262,8807,8836,140885,148281	ABL1,AQP3,PTK2B,FOSB,NEFL,PRKN,PSAP,RYR2,IL18RAP,GGH,SIRPA,SYT6
15_Member	GO Biological Processes	GO:0035690	cellular response to drug	-2.44347	-0.612872	9/376	25,5071,5581,5660,6262,7037,8091,8807,140885	ABL1,PRKN,PRKCE,PSAP,RYR2,TFRC,HMGA2,IL18RAP,SIRPA
15_Member	GO Biological Processes	GO:0042542	response to hydrogen peroxide	-2.17359	-0.446533	5/146	25,2185,5660,8807,140885	ABL1,PTK2B,PSAP,IL18RAP,SIRPA
15_Member	GO Biological Processes	GO:0002274	myeloid leukocyte activation	-2.1417	-0.425903	12/656	683,1773,5581,5660,5795,8807,8836,9145,10077,10970,133396,140885	BST1,DNASE1,PRKCE,PSAP,PTPRJ,IL18RAP,GGH,SYNGR1,TSPAN32,CKAP4,IL31RA,SIRPA
15_Member	GO Biological Processes	GO:0071236	cellular response to antibiotic	-2.13716	-0.425903	5/149	25,5581,5660,8807,140885	ABL1,PRKCE,PSAP,IL18RAP,SIRPA
15_Member	GO Biological Processes	GO:0070301	cellular response to hydrogen peroxide	-2.05413	-0.38961	4/100	25,5660,8807,140885	ABL1,PSAP,IL18RAP,SIRPA
16_Summary	GO Biological Processes	GO:0032970	regulation of actin filament-based process	-4.57466	-1.9962	13/404	25,683,2059,2185,2909,5071,5154,5581,6262,6624,23433,55607,85458,2302,9844,154810,221061,56990,286530,3350,4747,6532,6696,10512,59272,1026,2247,10252,2099,5795,7037,9746	ABL1,BST1,EPS8,PTK2B,ARHGAP35,PRKN,PDGFA,PRKCE,RYR2,FSCN1,RHOQ,PPP1R9A,DIXDC1,FOXJ1,ELMO1,AMOTL1,FAM171A1,CDC42SE2,P2RY8,HTR1A,NEFL,SLC6A4,SPP1,SEMA3C,ACE2,CDKN1A,FGF2,SPRY1,ESR1,PTPRJ,TFRC,CLSTN3
16_Member	GO Biological Processes	GO:0032970	regulation of actin filament-based process	-4.57466	-1.9962	13/404	25,683,2059,2185,2909,5071,5154,5581,6262,6624,23433,55607,85458	ABL1,BST1,EPS8,PTK2B,ARHGAP35,PRKN,PDGFA,PRKCE,RYR2,FSCN1,RHOQ,PPP1R9A,DIXDC1
16_Member	GO Biological Processes	GO:0032956	regulation of actin cytoskeleton organization	-4.42235	-1.90378	12/359	25,683,2059,2185,2909,5071,5154,5581,6624,23433,55607,85458	ABL1,BST1,EPS8,PTK2B,ARHGAP35,PRKN,PDGFA,PRKCE,FSCN1,RHOQ,PPP1R9A,DIXDC1
16_Member	GO Biological Processes	GO:0030036	actin cytoskeleton organization	-3.77905	-1.47687	16/692	25,683,2059,2185,2302,2909,5071,5154,5581,6624,9844,23433,55607,85458,154810,221061	ABL1,BST1,EPS8,PTK2B,FOXJ1,ARHGAP35,PRKN,PDGFA,PRKCE,FSCN1,ELMO1,RHOQ,PPP1R9A,DIXDC1,AMOTL1,FAM171A1
16_Member	GO Biological Processes	GO:0030029	actin filament-based process	-3.64761	-1.40266	17/785	25,683,2059,2185,2302,2909,5071,5154,5581,6262,6624,9844,23433,55607,85458,154810,221061	ABL1,BST1,EPS8,PTK2B,FOXJ1,ARHGAP35,PRKN,PDGFA,PRKCE,RYR2,FSCN1,ELMO1,RHOQ,PPP1R9A,DIXDC1,AMOTL1,FAM171A1
16_Member	GO Biological Processes	GO:0051017	actin filament bundle assembly	-3.38526	-1.20249	7/166	25,2059,2185,5071,6624,55607,221061	ABL1,EPS8,PTK2B,PRKN,FSCN1,PPP1R9A,FAM171A1
16_Member	GO Biological Processes	GO:0061572	actin filament bundle organization	-3.32326	-1.15687	7/170	25,2059,2185,5071,6624,55607,221061	ABL1,EPS8,PTK2B,PRKN,FSCN1,PPP1R9A,FAM171A1
16_Member	GO Biological Processes	GO:0035023	regulation of Rho protein signal transduction	-3.24662	-1.10751	5/83	25,2059,2909,56990,286530	ABL1,EPS8,ARHGAP35,CDC42SE2,P2RY8
16_Member	GO Biological Processes	GO:0090066	regulation of anatomical structure size	-2.98987	-0.956019	12/515	25,2059,2185,2909,3350,4747,5581,6532,6696,10512,55607,59272	ABL1,EPS8,PTK2B,ARHGAP35,HTR1A,NEFL,PRKCE,SLC6A4,SPP1,SEMA3C,PPP1R9A,ACE2
16_Member	GO Biological Processes	GO:0007266	Rho protein signal transduction	-2.85459	-0.866968	6/150	25,2059,2909,23433,56990,286530	ABL1,EPS8,ARHGAP35,RHOQ,CDC42SE2,P2RY8
16_Member	GO Biological Processes	GO:0007265	Ras protein signal transduction	-2.78155	-0.814737	10/402	25,1026,2059,2247,2909,9844,10252,23433,56990,286530	ABL1,CDKN1A,EPS8,FGF2,ARHGAP35,ELMO1,SPRY1,RHOQ,CDC42SE2,P2RY8
16_Member	GO Biological Processes	GO:0051493	regulation of cytoskeleton organization	-2.71681	-0.780125	12/555	25,683,2059,2185,2909,5071,5154,5581,6624,23433,55607,85458	ABL1,BST1,EPS8,PTK2B,ARHGAP35,PRKN,PDGFA,PRKCE,FSCN1,RHOQ,PPP1R9A,DIXDC1
16_Member	GO Biological Processes	GO:0044089	positive regulation of cellular component biogenesis	-2.69109	-0.772311	12/559	25,2059,2099,2185,2909,5581,5795,6624,7037,9746,23433,59272	ABL1,EPS8,ESR1,PTK2B,ARHGAP35,PRKCE,PTPRJ,FSCN1,TFRC,CLSTN3,RHOQ,ACE2
16_Member	GO Biological Processes	GO:0008360	regulation of cell shape	-2.67177	-0.766896	6/163	2059,2185,2909,23433,56990,221061	EPS8,PTK2B,ARHGAP35,RHOQ,CDC42SE2,FAM171A1
16_Member	GO Biological Processes	GO:0007015	actin filament organization	-2.5987	-0.721104	10/426	25,2059,2185,2909,5071,5581,6624,23433,55607,221061	ABL1,EPS8,PTK2B,ARHGAP35,PRKN,PRKCE,FSCN1,RHOQ,PPP1R9A,FAM171A1
16_Member	GO Biological Processes	GO:0032535	regulation of cellular component size	-2.42843	-0.602216	9/378	25,2059,2185,2909,4747,5581,6696,10512,55607	ABL1,EPS8,PTK2B,ARHGAP35,NEFL,PRKCE,SPP1,SEMA3C,PPP1R9A
16_Member	GO Biological Processes	GO:0046578	regulation of Ras protein signal transduction	-2.42297	-0.602216	6/183	25,2059,2909,10252,56990,286530	ABL1,EPS8,ARHGAP35,SPRY1,CDC42SE2,P2RY8
16_Member	GO Biological Processes	GO:0110053	regulation of actin filament organization	-2.13746	-0.425903	7/276	25,2059,2185,2909,5071,5581,55607	ABL1,EPS8,PTK2B,ARHGAP35,PRKN,PRKCE,PPP1R9A
16_Member	GO Biological Processes	GO:0120034	positive regulation of plasma membrane bounded cell projection assembly	-2.05413	-0.38961	4/100	2059,2909,6624,23433	EPS8,ARHGAP35,FSCN1,RHOQ
16_Member	GO Biological Processes	GO:0051258	protein polymerization	-2.02588	-0.37369	7/290	25,2059,2185,4747,5071,5581,55607	ABL1,EPS8,PTK2B,NEFL,PRKN,PRKCE,PPP1R9A
17_Summary	GO Biological Processes	GO:0007610	behavior	-4.35639	-1.89211	16/617	2043,2059,2115,2119,3350,5071,5270,5581,5590,5660,6532,8322,22986,56172,59272,84446	EPHA4,EPS8,ETV1,ETV5,HTR1A,PRKN,SERPINE2,PRKCE,PRKCZ,PSAP,SLC6A4,FZD4,SORCS3,ANKH,ACE2,BRSK1
17_Member	GO Biological Processes	GO:0007610	behavior	-4.35639	-1.89211	16/617	2043,2059,2115,2119,3350,5071,5270,5581,5590,5660,6532,8322,22986,56172,59272,84446	EPHA4,EPS8,ETV1,ETV5,HTR1A,PRKN,SERPINE2,PRKCE,PRKCZ,PSAP,SLC6A4,FZD4,SORCS3,ANKH,ACE2,BRSK1
17_Member	GO Biological Processes	GO:0007626	locomotory behavior	-3.66905	-1.40876	8/198	2043,2059,2119,5071,5581,5660,8322,56172	EPHA4,EPS8,ETV5,PRKN,PRKCE,PSAP,FZD4,ANKH
18_Summary	GO Biological Processes	GO:0048871	multicellular organismal homeostasis	-4.34926	-1.89211	14/487	43,360,2034,2185,3988,6696,7037,7399,8842,22841,23090,25937,56603,63976,10457,10512,5071	ACHE,AQP3,EPAS1,PTK2B,LIPA,SPP1,TFRC,USH2A,PROM1,RAB11FIP2,ZNF423,WWTR1,CYP26B1,PRDM16,GPNMB,SEMA3C,PRKN
18_Member	GO Biological Processes	GO:0048871	multicellular organismal homeostasis	-4.34926	-1.89211	14/487	43,360,2034,2185,3988,6696,7037,7399,8842,22841,23090,25937,56603,63976	ACHE,AQP3,EPAS1,PTK2B,LIPA,SPP1,TFRC,USH2A,PROM1,RAB11FIP2,ZNF423,WWTR1,CYP26B1,PRDM16
18_Member	GO Biological Processes	GO:0001894	tissue homeostasis	-3.272	-1.12211	8/227	2034,2185,3988,6696,7037,7399,8842,25937	EPAS1,PTK2B,LIPA,SPP1,TFRC,USH2A,PROM1,WWTR1
18_Member	GO Biological Processes	GO:0048771	tissue remodeling	-3.16148	-1.06205	7/181	2034,2185,3988,6696,7037,10457,10512	EPAS1,PTK2B,LIPA,SPP1,TFRC,GPNMB,SEMA3C
18_Member	GO Biological Processes	GO:0060249	anatomical structure homeostasis	-2.03029	-0.375788	9/437	2034,2185,3988,5071,6696,7037,7399,8842,25937	EPAS1,PTK2B,LIPA,PRKN,SPP1,TFRC,USH2A,PROM1,WWTR1
19_Summary	GO Biological Processes	GO:0045936	negative regulation of phosphate metabolic process	-3.96421	-1.6095	15/597	25,1026,1846,5071,5154,5590,5795,7078,9749,10252,25937,79899,140885,201626,221496,5581,9425,1827,2099,2909,5270,9971	ABL1,CDKN1A,DUSP4,PRKN,PDGFA,PRKCZ,PTPRJ,TIMP3,PHACTR2,SPRY1,WWTR1,PRR5L,SIRPA,PDE12,LEMD2,PRKCE,CDYL,RCAN1,ESR1,ARHGAP35,SERPINE2,NR1H4
19_Member	GO Biological Processes	GO:0045936	negative regulation of phosphate metabolic process	-3.96421	-1.6095	15/597	25,1026,1846,5071,5154,5590,5795,7078,9749,10252,25937,79899,140885,201626,221496	ABL1,CDKN1A,DUSP4,PRKN,PDGFA,PRKCZ,PTPRJ,TIMP3,PHACTR2,SPRY1,WWTR1,PRR5L,SIRPA,PDE12,LEMD2
19_Member	GO Biological Processes	GO:0010563	negative regulation of phosphorus metabolic process	-3.95623	-1.60768	15/598	25,1026,1846,5071,5154,5590,5795,7078,9749,10252,25937,79899,140885,201626,221496	ABL1,CDKN1A,DUSP4,PRKN,PDGFA,PRKCZ,PTPRJ,TIMP3,PHACTR2,SPRY1,WWTR1,PRR5L,SIRPA,PDE12,LEMD2
19_Member	GO Biological Processes	GO:0042326	negative regulation of phosphorylation	-3.8459	-1.52115	13/477	25,1026,1846,5071,5590,5795,7078,10252,25937,79899,140885,201626,221496	ABL1,CDKN1A,DUSP4,PRKN,PRKCZ,PTPRJ,TIMP3,SPRY1,WWTR1,PRR5L,SIRPA,PDE12,LEMD2
19_Member	GO Biological Processes	GO:0043409	negative regulation of MAPK cascade	-3.83872	-1.51973	8/187	25,1846,5071,5795,7078,10252,140885,221496	ABL1,DUSP4,PRKN,PTPRJ,TIMP3,SPRY1,SIRPA,LEMD2
19_Member	GO Biological Processes	GO:0031400	negative regulation of protein modification process	-3.70293	-1.4274	15/631	25,1026,1846,5071,5581,5590,5795,7078,9425,9749,10252,25937,79899,140885,221496	ABL1,CDKN1A,DUSP4,PRKN,PRKCE,PRKCZ,PTPRJ,TIMP3,CDYL,PHACTR2,SPRY1,WWTR1,PRR5L,SIRPA,LEMD2
19_Member	GO Biological Processes	GO:0001933	negative regulation of protein phosphorylation	-3.62885	-1.39752	12/436	25,1026,1846,5071,5590,5795,7078,10252,25937,79899,140885,221496	ABL1,CDKN1A,DUSP4,PRKN,PRKCZ,PTPRJ,TIMP3,SPRY1,WWTR1,PRR5L,SIRPA,LEMD2
19_Member	GO Biological Processes	GO:0070373	negative regulation of ERK1 and ERK2 cascade	-3.44994	-1.25873	5/75	25,1846,7078,10252,140885	ABL1,DUSP4,TIMP3,SPRY1,SIRPA
19_Member	GO Biological Processes	GO:1902532	negative regulation of intracellular signal transduction	-3.10399	-1.02632	13/571	25,1827,1846,2099,2909,5071,5270,5795,7078,9971,10252,140885,221496	ABL1,RCAN1,DUSP4,ESR1,ARHGAP35,PRKN,SERPINE2,PTPRJ,TIMP3,NR1H4,SPRY1,SIRPA,LEMD2
19_Member	GO Biological Processes	GO:0033673	negative regulation of kinase activity	-2.23939	-0.48829	7/264	25,1026,1846,5071,5795,10252,25937	ABL1,CDKN1A,DUSP4,PRKN,PTPRJ,SPRY1,WWTR1
19_Member	GO Biological Processes	GO:0071901	negative regulation of protein serine/threonine kinase activity	-2.13716	-0.425903	5/149	25,1026,1846,5795,10252	ABL1,CDKN1A,DUSP4,PTPRJ,SPRY1
19_Member	GO Biological Processes	GO:0051348	negative regulation of transferase activity	-2.00292	-0.361822	7/293	25,1026,1846,5071,5795,10252,25937	ABL1,CDKN1A,DUSP4,PRKN,PTPRJ,SPRY1,WWTR1
20_Summary	GO Biological Processes	GO:0010817	regulation of hormone levels	-3.89972	-1.55724	14/537	43,653,2099,3350,5071,5581,6696,8322,8614,9971,22841,50506,56603,59272,360,1591,2034,2185,2247,3613,3988,158219,6532,13,5660,79887	ACHE,BMP5,ESR1,HTR1A,PRKN,PRKCE,SPP1,FZD4,STC2,NR1H4,RAB11FIP2,DUOX2,CYP26B1,ACE2,AQP3,CYP24A1,EPAS1,PTK2B,FGF2,IMPA2,LIPA,TTC39B,SLC6A4,AADAC,PSAP,PLBD1
20_Member	GO Biological Processes	GO:0010817	regulation of hormone levels	-3.89972	-1.55724	14/537	43,653,2099,3350,5071,5581,6696,8322,8614,9971,22841,50506,56603,59272	ACHE,BMP5,ESR1,HTR1A,PRKN,PRKCE,SPP1,FZD4,STC2,NR1H4,RAB11FIP2,DUOX2,CYP26B1,ACE2
20_Member	GO Biological Processes	GO:0033280	response to vitamin D	-3.7038	-1.4274	4/36	360,1591,6696,8614	AQP3,CYP24A1,SPP1,STC2
20_Member	GO Biological Processes	GO:1901615	organic hydroxy compound metabolic process	-3.26884	-1.12211	13/548	653,1591,2034,2185,2247,3350,3613,3988,5071,9971,50506,56603,158219	BMP5,CYP24A1,EPAS1,PTK2B,FGF2,HTR1A,IMPA2,LIPA,PRKN,NR1H4,DUOX2,CYP26B1,TTC39B
20_Member	GO Biological Processes	GO:0042445	hormone metabolic process	-3.10228	-1.02632	8/241	43,653,2099,6696,8614,50506,56603,59272	ACHE,BMP5,ESR1,SPP1,STC2,DUOX2,CYP26B1,ACE2
20_Member	GO Biological Processes	GO:0033273	response to vitamin	-3.06458	-1.0109	5/91	360,1591,6696,8614,56603	AQP3,CYP24A1,SPP1,STC2,CYP26B1
20_Member	GO Biological Processes	GO:0007584	response to nutrient	-2.68406	-0.769951	7/219	360,1591,6532,6696,8614,9971,56603	AQP3,CYP24A1,SLC6A4,SPP1,STC2,NR1H4,CYP26B1
20_Member	GO Biological Processes	GO:0016042	lipid catabolic process	-2.25071	-0.494948	8/331	13,1591,3988,5581,5660,6696,56603,79887	AADAC,CYP24A1,LIPA,PRKCE,PSAP,SPP1,CYP26B1,PLBD1
20_Member	GO Biological Processes	GO:0008202	steroid metabolic process	-2.24305	-0.490399	8/332	653,1591,2099,3988,6696,9971,56603,158219	BMP5,CYP24A1,ESR1,LIPA,SPP1,NR1H4,CYP26B1,TTC39B

## Sheet: MYOD1KO VSMYOD1NC DOWN
GroupID	Category	Term	Description	LogP	Log(q-value)	InTerm_InList	Genes	Symbols
1_Summary	GO Biological Processes	GO:0044057	regulation of system process	-12.2208	-8.02101	44/617	186,309,351,489,779,816,845,1264,1674,2661,2693,2740,3082,3553,3624,3625,3761,4625,4846,4856,5649,6263,6442,7125,7134,7138,8604,9254,9992,10203,10369,10497,10659,23467,23493,51083,51086,53632,53826,64091,84676,85366,93649,118738,947,3212,4843,7010,7122,288	AGTR2,ANXA6,APP,ATP2A3,CACNA1S,CAMK2B,CASQ2,CNN1,DES,GDF9,GHSR,GLP1R,HGF,IL1B,INHBA,INHBB,KCNJ4,MYH7,NOS3,CCN3,RELN,RYR3,SGCA,TNNC2,TNNC1,TNNT1,SLC25A12,CACNA2D2,KCNE2,CALCRL,CACNG2,UNC13B,CELF2,NPTXR,HEY2,GAL,TNNI3K,PRKAG3,FXYD6,POPDC2,TRIM63,MYLK2,MYOCD,ZNF488,CD34,HOXB2,NOS2,TEK,CLDN5,ANK3
1_Member	GO Biological Processes	GO:0044057	regulation of system process	-12.2208	-8.02101	44/617	186,309,351,489,779,816,845,1264,1674,2661,2693,2740,3082,3553,3624,3625,3761,4625,4846,4856,5649,6263,6442,7125,7134,7138,8604,9254,9992,10203,10369,10497,10659,23467,23493,51083,51086,53632,53826,64091,84676,85366,93649,118738	AGTR2,ANXA6,APP,ATP2A3,CACNA1S,CAMK2B,CASQ2,CNN1,DES,GDF9,GHSR,GLP1R,HGF,IL1B,INHBA,INHBB,KCNJ4,MYH7,NOS3,CCN3,RELN,RYR3,SGCA,TNNC2,TNNC1,TNNT1,SLC25A12,CACNA2D2,KCNE2,CALCRL,CACNG2,UNC13B,CELF2,NPTXR,HEY2,GAL,TNNI3K,PRKAG3,FXYD6,POPDC2,TRIM63,MYLK2,MYOCD,ZNF488
1_Member	GO Biological Processes	GO:0060047	heart contraction	-6.37787	-3.25724	21/284	186,489,779,845,1674,2740,3761,4625,4846,6263,7134,7138,9254,9992,10369,10659,23493,51086,53826,64091,85366	AGTR2,ATP2A3,CACNA1S,CASQ2,DES,GLP1R,KCNJ4,MYH7,NOS3,RYR3,TNNC1,TNNT1,CACNA2D2,KCNE2,CACNG2,CELF2,HEY2,TNNI3K,FXYD6,POPDC2,MYLK2
1_Member	GO Biological Processes	GO:0003015	heart process	-6.13203	-3.07835	21/294	186,489,779,845,1674,2740,3761,4625,4846,6263,7134,7138,9254,9992,10369,10659,23493,51086,53826,64091,85366	AGTR2,ATP2A3,CACNA1S,CASQ2,DES,GLP1R,KCNJ4,MYH7,NOS3,RYR3,TNNC1,TNNT1,CACNA2D2,KCNE2,CACNG2,CELF2,HEY2,TNNI3K,FXYD6,POPDC2,MYLK2
1_Member	GO Biological Processes	GO:0008016	regulation of heart contraction	-5.2948	-2.52538	18/254	186,489,779,845,1674,2740,3761,4625,4846,6263,9254,9992,10369,10659,23493,51086,53826,64091	AGTR2,ATP2A3,CACNA1S,CASQ2,DES,GLP1R,KCNJ4,MYH7,NOS3,RYR3,CACNA2D2,KCNE2,CACNG2,CELF2,HEY2,TNNI3K,FXYD6,POPDC2
1_Member	GO Biological Processes	GO:1903522	regulation of blood circulation	-4.30439	-1.9804	18/301	186,489,779,845,1674,2740,3761,4625,4846,6263,9254,9992,10369,10659,23493,51086,53826,64091	AGTR2,ATP2A3,CACNA1S,CASQ2,DES,GLP1R,KCNJ4,MYH7,NOS3,RYR3,CACNA2D2,KCNE2,CACNG2,CELF2,HEY2,TNNI3K,FXYD6,POPDC2
1_Member	GO Biological Processes	GO:0008015	blood circulation	-4.24442	-1.94223	26/544	186,489,779,845,947,1674,2740,3212,3761,4625,4843,4846,6263,7010,7122,7134,7138,9254,9992,10369,10659,23493,51086,53826,64091,85366	AGTR2,ATP2A3,CACNA1S,CASQ2,CD34,DES,GLP1R,HOXB2,KCNJ4,MYH7,NOS2,NOS3,RYR3,TEK,CLDN5,TNNC1,TNNT1,CACNA2D2,KCNE2,CACNG2,CELF2,HEY2,TNNI3K,FXYD6,POPDC2,MYLK2
1_Member	GO Biological Processes	GO:0003013	circulatory system process	-4.11523	-1.84992	26/554	186,489,779,845,947,1674,2740,3212,3761,4625,4843,4846,6263,7010,7122,7134,7138,9254,9992,10369,10659,23493,51086,53826,64091,85366	AGTR2,ATP2A3,CACNA1S,CASQ2,CD34,DES,GLP1R,HOXB2,KCNJ4,MYH7,NOS2,NOS3,RYR3,TEK,CLDN5,TNNC1,TNNT1,CACNA2D2,KCNE2,CACNG2,CELF2,HEY2,TNNI3K,FXYD6,POPDC2,MYLK2
1_Member	GO Biological Processes	GO:0061337	cardiac conduction	-3.03752	-1.2129	10/148	489,779,845,3761,6263,9254,9992,10369,51086,53826	ATP2A3,CACNA1S,CASQ2,KCNJ4,RYR3,CACNA2D2,KCNE2,CACNG2,TNNI3K,FXYD6
1_Member	GO Biological Processes	GO:0035637	multicellular organismal signaling	-2.96185	-1.16344	12/206	288,489,779,845,2693,3761,6263,9254,9992,10369,51086,53826	ANK3,ATP2A3,CACNA1S,CASQ2,GHSR,KCNJ4,RYR3,CACNA2D2,KCNE2,CACNG2,TNNI3K,FXYD6
1_Member	GO Biological Processes	GO:0002027	regulation of heart rate	-2.34059	-0.780541	7/101	186,845,4625,9992,23493,51086,64091	AGTR2,CASQ2,MYH7,KCNE2,HEY2,TNNI3K,POPDC2
2_Summary	GO Biological Processes	GO:0001501	skeletal system development	-8.94573	-5.04695	35/529	309,652,1009,1280,1303,2254,2736,2822,3199,3212,3215,3216,3218,3636,3950,4060,4856,4982,5251,5308,5549,5915,6423,6862,7010,7045,7482,8840,9249,10220,10468,25884,63827,81029,338773,947,1289	ANXA6,BMP4,CDH11,COL2A1,COL12A1,FGF9,GLI2,GPLD1,HOXA2,HOXB2,HOXB5,HOXB6,HOXB8,INPPL1,LECT2,LUM,CCN3,TNFRSF11B,PHEX,PITX2,PRELP,RARB,SFRP2,TBXT,TEK,TGFBI,WNT2B,CCN4,DHRS3,GDF11,FST,CHRDL2,BCAN,WNT5B,TMEM119,CD34,COL5A1
2_Member	GO Biological Processes	GO:0001501	skeletal system development	-8.94573	-5.04695	35/529	309,652,1009,1280,1303,2254,2736,2822,3199,3212,3215,3216,3218,3636,3950,4060,4856,4982,5251,5308,5549,5915,6423,6862,7010,7045,7482,8840,9249,10220,10468,25884,63827,81029,338773	ANXA6,BMP4,CDH11,COL2A1,COL12A1,FGF9,GLI2,GPLD1,HOXA2,HOXB2,HOXB5,HOXB6,HOXB8,INPPL1,LECT2,LUM,CCN3,TNFRSF11B,PHEX,PITX2,PRELP,RARB,SFRP2,TBXT,TEK,TGFBI,WNT2B,CCN4,DHRS3,GDF11,FST,CHRDL2,BCAN,WNT5B,TMEM119
2_Member	GO Biological Processes	GO:0002062	chondrocyte differentiation	-6.61952	-3.39449	14/124	309,652,1280,1303,2254,2736,2822,4856,5915,6423,7045,7482,8840,81029	ANXA6,BMP4,COL2A1,COL12A1,FGF9,GLI2,GPLD1,CCN3,RARB,SFRP2,TGFBI,WNT2B,CCN4,WNT5B
2_Member	GO Biological Processes	GO:0051216	cartilage development	-5.1157	-2.43702	16/212	309,652,1280,1303,2254,2736,2822,4060,4856,5915,6423,7045,7482,8840,25884,81029	ANXA6,BMP4,COL2A1,COL12A1,FGF9,GLI2,GPLD1,LUM,CCN3,RARB,SFRP2,TGFBI,WNT2B,CCN4,CHRDL2,WNT5B
2_Member	GO Biological Processes	GO:0060349	bone morphogenesis	-4.81845	-2.25366	11/110	309,652,1280,1303,3636,5915,6423,6862,7010,9249,338773	ANXA6,BMP4,COL2A1,COL12A1,INPPL1,RARB,SFRP2,TBXT,TEK,DHRS3,TMEM119
2_Member	GO Biological Processes	GO:0061448	connective tissue development	-4.75925	-2.24963	18/278	309,652,947,1280,1289,1303,2254,2736,2822,4060,4856,5915,6423,7045,7482,8840,25884,81029	ANXA6,BMP4,CD34,COL2A1,COL5A1,COL12A1,FGF9,GLI2,GPLD1,LUM,CCN3,RARB,SFRP2,TGFBI,WNT2B,CCN4,CHRDL2,WNT5B
2_Member	GO Biological Processes	GO:0048705	skeletal system morphogenesis	-4.44877	-2.0685	16/240	309,652,1280,1303,3199,3212,3215,3216,3218,3636,5915,6423,6862,7010,9249,338773	ANXA6,BMP4,COL2A1,COL12A1,HOXA2,HOXB2,HOXB5,HOXB6,HOXB8,INPPL1,RARB,SFRP2,TBXT,TEK,DHRS3,TMEM119
2_Member	GO Biological Processes	GO:0060350	endochondral bone morphogenesis	-4.06663	-1.81621	8/70	309,652,1280,1303,3636,5915,7010,338773	ANXA6,BMP4,COL2A1,COL12A1,INPPL1,RARB,TEK,TMEM119
2_Member	GO Biological Processes	GO:0060348	bone development	-3.77454	-1.63143	14/219	309,652,1280,1303,3636,5251,5308,5915,6423,6862,7010,8840,9249,338773	ANXA6,BMP4,COL2A1,COL12A1,INPPL1,PHEX,PITX2,RARB,SFRP2,TBXT,TEK,CCN4,DHRS3,TMEM119
2_Member	GO Biological Processes	GO:0001958	endochondral ossification	-3.64516	-1.55818	5/28	652,1280,3636,7010,338773	BMP4,COL2A1,INPPL1,TEK,TMEM119
2_Member	GO Biological Processes	GO:0036075	replacement ossification	-3.64516	-1.55818	5/28	652,1280,3636,7010,338773	BMP4,COL2A1,INPPL1,TEK,TMEM119
3_Summary	GO Biological Processes	GO:0098662	inorganic cation transmembrane transport	-7.67991	-3.95723	41/767	88,288,309,489,779,825,845,2040,2273,2745,3747,3761,4508,4509,4513,4514,4519,4538,6263,6337,6553,6556,6569,7352,8647,9254,9651,9992,10369,23236,23315,51083,53826,56704,57113,57419,81031,84329,84812,117531,246329,4846,150094	ACTN2,ANK3,ANXA6,ATP2A3,CACNA1S,CAPN3,CASQ2,STOM,FHL1,GLRX,KCNC2,KCNJ4,ATP6,ATP8,COX2,COX3,CYTB,ND4,RYR3,SCNN1A,SLC9A5,SLC11A1,SLC34A1,UCP3,ABCB11,CACNA2D2,PLCH2,KCNE2,CACNG2,PLCB1,SLC9A8,GAL,FXYD6,JPH1,TRPC7,SLC24A3,SLC2A10,HVCN1,PLCD4,TMC1,STAC3,NOS3,SIK1
3_Member	GO Biological Processes	GO:0098662	inorganic cation transmembrane transport	-7.67991	-3.95723	41/767	88,288,309,489,779,825,845,2040,2273,2745,3747,3761,4508,4509,4513,4514,4519,4538,6263,6337,6553,6556,6569,7352,8647,9254,9651,9992,10369,23236,23315,51083,53826,56704,57113,57419,81031,84329,84812,117531,246329	ACTN2,ANK3,ANXA6,ATP2A3,CACNA1S,CAPN3,CASQ2,STOM,FHL1,GLRX,KCNC2,KCNJ4,ATP6,ATP8,COX2,COX3,CYTB,ND4,RYR3,SCNN1A,SLC9A5,SLC11A1,SLC34A1,UCP3,ABCB11,CACNA2D2,PLCH2,KCNE2,CACNG2,PLCB1,SLC9A8,GAL,FXYD6,JPH1,TRPC7,SLC24A3,SLC2A10,HVCN1,PLCD4,TMC1,STAC3
3_Member	GO Biological Processes	GO:0015672	monovalent inorganic cation transport	-5.66089	-2.8035	29/538	88,288,489,845,2040,2273,2745,3747,3761,4508,4509,4513,4514,4519,4538,4846,6337,6553,6569,7352,8647,9992,23315,51083,53826,57419,81031,84329,150094	ACTN2,ANK3,ATP2A3,CASQ2,STOM,FHL1,GLRX,KCNC2,KCNJ4,ATP6,ATP8,COX2,COX3,CYTB,ND4,NOS3,SCNN1A,SLC9A5,SLC34A1,UCP3,ABCB11,KCNE2,SLC9A8,GAL,FXYD6,SLC24A3,SLC2A10,HVCN1,SIK1
3_Member	GO Biological Processes	GO:1902600	proton transmembrane transport	-3.90666	-1.71117	12/162	489,4508,4509,4513,4514,4519,4538,6553,7352,23315,81031,84329	ATP2A3,ATP6,ATP8,COX2,COX3,CYTB,ND4,SLC9A5,UCP3,SLC9A8,SLC2A10,HVCN1
4_Summary	GO Biological Processes	GO:0007507	heart development	-7.23966	-3.815	34/589	88,186,652,1280,1289,2254,2735,2736,4625,4846,5292,5308,5600,5915,6423,6862,7010,7122,7134,9172,9249,10203,10529,11174,23493,23767,27063,55130,55803,56999,64091,85366,93649,150094,825,845,2273,2817,3679,4618,4856,6300,6442,7138,9254,10324,23236,29765,55544,56704,246329,338773	ACTN2,AGTR2,BMP4,COL2A1,COL5A1,FGF9,GLI1,GLI2,MYH7,NOS3,PIM1,PITX2,MAPK11,RARB,SFRP2,TBXT,TEK,CLDN5,TNNC1,MYOM2,DHRS3,CALCRL,NEBL,ADAMTS6,HEY2,FLRT3,ANKRD1,ARMC4,ADAP2,ADAMTS9,POPDC2,MYLK2,MYOCD,SIK1,CAPN3,CASQ2,FHL1,GPC1,ITGA7,MYF6,CCN3,MAPK12,SGCA,TNNT1,CACNA2D2,KLHL41,PLCB1,TMOD4,RBM38,JPH1,STAC3,TMEM119
4_Member	GO Biological Processes	GO:0007507	heart development	-7.23966	-3.815	34/589	88,186,652,1280,1289,2254,2735,2736,4625,4846,5292,5308,5600,5915,6423,6862,7010,7122,7134,9172,9249,10203,10529,11174,23493,23767,27063,55130,55803,56999,64091,85366,93649,150094	ACTN2,AGTR2,BMP4,COL2A1,COL5A1,FGF9,GLI1,GLI2,MYH7,NOS3,PIM1,PITX2,MAPK11,RARB,SFRP2,TBXT,TEK,CLDN5,TNNC1,MYOM2,DHRS3,CALCRL,NEBL,ADAMTS6,HEY2,FLRT3,ANKRD1,ARMC4,ADAP2,ADAMTS9,POPDC2,MYLK2,MYOCD,SIK1
4_Member	GO Biological Processes	GO:0061061	muscle structure development	-7.23794	-3.815	37/676	88,186,652,825,845,2254,2273,2735,2817,3679,4618,4625,4856,5292,5600,5915,6300,6442,6862,7134,7138,9172,9254,10324,10529,23236,23493,27063,29765,55544,56704,64091,85366,93649,150094,246329,338773	ACTN2,AGTR2,BMP4,CAPN3,CASQ2,FGF9,FHL1,GLI1,GPC1,ITGA7,MYF6,MYH7,CCN3,PIM1,MAPK11,RARB,MAPK12,SGCA,TBXT,TNNC1,TNNT1,MYOM2,CACNA2D2,KLHL41,NEBL,PLCB1,HEY2,ANKRD1,TMOD4,RBM38,JPH1,POPDC2,MYLK2,MYOCD,SIK1,STAC3,TMEM119
4_Member	GO Biological Processes	GO:0048738	cardiac muscle tissue development	-5.7977	-2.82833	18/234	88,186,652,2254,2735,4625,5292,5600,5915,7134,9172,10529,23493,27063,56999,85366,93649,150094	ACTN2,AGTR2,BMP4,FGF9,GLI1,MYH7,PIM1,MAPK11,RARB,TNNC1,MYOM2,NEBL,HEY2,ANKRD1,ADAMTS9,MYLK2,MYOCD,SIK1
4_Member	GO Biological Processes	GO:0014706	striated muscle tissue development	-5.23555	-2.51286	23/390	88,186,652,2254,2735,2817,4618,4625,5292,5600,5915,7134,9172,10324,10529,23493,27063,56999,64091,85366,93649,150094,246329	ACTN2,AGTR2,BMP4,FGF9,GLI1,GPC1,MYF6,MYH7,PIM1,MAPK11,RARB,TNNC1,MYOM2,KLHL41,NEBL,HEY2,ANKRD1,ADAMTS9,POPDC2,MYLK2,MYOCD,SIK1,STAC3
4_Member	GO Biological Processes	GO:0003007	heart morphogenesis	-5.1315	-2.43702	18/261	652,1280,1289,4625,4846,5292,5308,5915,6423,6862,7010,7122,7134,9172,9249,23493,27063,85366	BMP4,COL2A1,COL5A1,MYH7,NOS3,PIM1,PITX2,RARB,SFRP2,TBXT,TEK,CLDN5,TNNC1,MYOM2,DHRS3,HEY2,ANKRD1,MYLK2
4_Member	GO Biological Processes	GO:0007517	muscle organ development	-4.95243	-2.32082	23/406	652,825,2254,2273,2735,2817,3679,4618,4625,5292,5600,6300,6442,7134,9172,10324,23493,27063,56704,64091,85366,93649,246329	BMP4,CAPN3,FGF9,FHL1,GLI1,GPC1,ITGA7,MYF6,MYH7,PIM1,MAPK11,MAPK12,SGCA,TNNC1,MYOM2,KLHL41,HEY2,ANKRD1,JPH1,POPDC2,MYLK2,MYOCD,STAC3
4_Member	GO Biological Processes	GO:0060537	muscle tissue development	-4.9012	-2.31418	23/409	88,186,652,2254,2735,2817,4618,4625,5292,5600,5915,7134,9172,10324,10529,23493,27063,56999,64091,85366,93649,150094,246329	ACTN2,AGTR2,BMP4,FGF9,GLI1,GPC1,MYF6,MYH7,PIM1,MAPK11,RARB,TNNC1,MYOM2,KLHL41,NEBL,HEY2,ANKRD1,ADAMTS9,POPDC2,MYLK2,MYOCD,SIK1,STAC3
4_Member	GO Biological Processes	GO:0060415	muscle tissue morphogenesis	-3.65616	-1.55818	8/80	652,4618,4625,7134,9172,23493,27063,85366	BMP4,MYF6,MYH7,TNNC1,MYOM2,HEY2,ANKRD1,MYLK2
4_Member	GO Biological Processes	GO:0048644	muscle organ morphogenesis	-3.40532	-1.4334	8/87	652,4618,4625,7134,9172,23493,27063,85366	BMP4,MYF6,MYH7,TNNC1,MYOM2,HEY2,ANKRD1,MYLK2
4_Member	GO Biological Processes	GO:0035051	cardiocyte differentiation	-3.30456	-1.3672	11/162	88,186,652,5308,5915,6862,9172,10529,23493,93649,150094	ACTN2,AGTR2,BMP4,PITX2,RARB,TBXT,MYOM2,NEBL,HEY2,MYOCD,SIK1
4_Member	GO Biological Processes	GO:0003205	cardiac chamber development	-3.06705	-1.21943	11/173	652,4625,4846,5915,6423,7010,7134,9249,11174,23493,93649	BMP4,MYH7,NOS3,RARB,SFRP2,TEK,TNNC1,DHRS3,ADAMTS6,HEY2,MYOCD
4_Member	GO Biological Processes	GO:0003151	outflow tract morphogenesis	-2.88501	-1.13139	7/81	652,5308,5915,6423,7122,9249,23493	BMP4,PITX2,RARB,SFRP2,CLDN5,DHRS3,HEY2
4_Member	GO Biological Processes	GO:0055007	cardiac muscle cell differentiation	-2.88404	-1.13139	9/129	88,186,652,5915,9172,10529,23493,93649,150094	ACTN2,AGTR2,BMP4,RARB,MYOM2,NEBL,HEY2,MYOCD,SIK1
4_Member	GO Biological Processes	GO:0003206	cardiac chamber morphogenesis	-2.83735	-1.09994	9/131	652,4625,4846,5915,6423,7010,7134,9249,23493	BMP4,MYH7,NOS3,RARB,SFRP2,TEK,TNNC1,DHRS3,HEY2
4_Member	GO Biological Processes	GO:0055008	cardiac muscle tissue morphogenesis	-2.65528	-0.98567	6/66	4625,7134,9172,23493,27063,85366	MYH7,TNNC1,MYOM2,HEY2,ANKRD1,MYLK2
4_Member	GO Biological Processes	GO:0055013	cardiac muscle cell development	-2.08819	-0.614287	6/86	88,186,652,9172,10529,23493	ACTN2,AGTR2,BMP4,MYOM2,NEBL,HEY2
5_Summary	GO Biological Processes	GO:0030198	extracellular matrix organization	-7.23666	-3.815	26/373	351,1280,1284,1289,1295,1303,2192,3674,3679,4016,4060,4982,5175,5806,6423,7045,7450,8292,8510,9719,56999,63827,64147,80781,84830,90102,947,88,347,4070,5880,7010,201294	APP,COL2A1,COL4A2,COL5A1,COL8A1,COL12A1,FBLN1,ITGA2B,ITGA7,LOXL1,LUM,TNFRSF11B,PECAM1,PTX3,SFRP2,TGFBI,VWF,COLQ,MMP23B,ADAMTSL2,ADAMTS9,BCAN,KIF9,COL18A1,ADTRP,PHLDB2,CD34,ACTN2,APOD,TACSTD2,RAC2,TEK,UNC13D
5_Member	GO Biological Processes	GO:0030198	extracellular matrix organization	-7.23666	-3.815	26/373	351,1280,1284,1289,1295,1303,2192,3674,3679,4016,4060,4982,5175,5806,6423,7045,7450,8292,8510,9719,56999,63827,64147,80781,84830,90102	APP,COL2A1,COL4A2,COL5A1,COL8A1,COL12A1,FBLN1,ITGA2B,ITGA7,LOXL1,LUM,TNFRSF11B,PECAM1,PTX3,SFRP2,TGFBI,VWF,COLQ,MMP23B,ADAMTSL2,ADAMTS9,BCAN,KIF9,COL18A1,ADTRP,PHLDB2
5_Member	GO Biological Processes	GO:0043062	extracellular structure organization	-6.5943	-3.39449	27/429	351,947,1280,1284,1289,1295,1303,2192,3674,3679,4016,4060,4982,5175,5806,6423,7045,7450,8292,8510,9719,56999,63827,64147,80781,84830,90102	APP,CD34,COL2A1,COL4A2,COL5A1,COL8A1,COL12A1,FBLN1,ITGA2B,ITGA7,LOXL1,LUM,TNFRSF11B,PECAM1,PTX3,SFRP2,TGFBI,VWF,COLQ,MMP23B,ADAMTSL2,ADAMTS9,BCAN,KIF9,COL18A1,ADTRP,PHLDB2
5_Member	GO Biological Processes	GO:0031589	cell-substrate adhesion	-2.21606	-0.697488	15/353	88,347,947,1295,2192,3674,3679,4070,5175,5880,7010,7450,56999,90102,201294	ACTN2,APOD,CD34,COL8A1,FBLN1,ITGA2B,ITGA7,TACSTD2,PECAM1,RAC2,TEK,VWF,ADAMTS9,PHLDB2,UNC13D
6_Summary	GO Biological Processes	GO:0003012	muscle system process	-7.01534	-3.66063	29/462	72,88,186,309,779,816,845,1264,1674,2693,3553,4625,4846,6442,7125,7134,7138,9172,9992,10203,10316,10324,23493,29765,51086,84676,85366,93649,246329,53632	ACTG2,ACTN2,AGTR2,ANXA6,CACNA1S,CAMK2B,CASQ2,CNN1,DES,GHSR,IL1B,MYH7,NOS3,SGCA,TNNC2,TNNC1,TNNT1,MYOM2,KCNE2,CALCRL,NMUR1,KLHL41,HEY2,TMOD4,TNNI3K,TRIM63,MYLK2,MYOCD,STAC3,PRKAG3
6_Member	GO Biological Processes	GO:0003012	muscle system process	-7.01534	-3.66063	29/462	72,88,186,309,779,816,845,1264,1674,2693,3553,4625,4846,6442,7125,7134,7138,9172,9992,10203,10316,10324,23493,29765,51086,84676,85366,93649,246329	ACTG2,ACTN2,AGTR2,ANXA6,CACNA1S,CAMK2B,CASQ2,CNN1,DES,GHSR,IL1B,MYH7,NOS3,SGCA,TNNC2,TNNC1,TNNT1,MYOM2,KCNE2,CALCRL,NMUR1,KLHL41,HEY2,TMOD4,TNNI3K,TRIM63,MYLK2,MYOCD,STAC3
6_Member	GO Biological Processes	GO:0006936	muscle contraction	-6.39498	-3.25724	24/359	72,88,309,779,845,1264,1674,2693,4625,6442,7125,7134,7138,9172,9992,10203,10316,10324,29765,51086,84676,85366,93649,246329	ACTG2,ACTN2,ANXA6,CACNA1S,CASQ2,CNN1,DES,GHSR,MYH7,SGCA,TNNC2,TNNC1,TNNT1,MYOM2,KCNE2,CALCRL,NMUR1,KLHL41,TMOD4,TNNI3K,TRIM63,MYLK2,MYOCD,STAC3
6_Member	GO Biological Processes	GO:0030049	muscle filament sliding	-4.92137	-2.32046	7/39	88,1674,4625,7125,7134,7138,85366	ACTN2,DES,MYH7,TNNC2,TNNC1,TNNT1,MYLK2
6_Member	GO Biological Processes	GO:0033275	actin-myosin filament sliding	-4.92137	-2.32046	7/39	88,1674,4625,7125,7134,7138,85366	ACTN2,DES,MYH7,TNNC2,TNNC1,TNNT1,MYLK2
6_Member	GO Biological Processes	GO:0090257	regulation of muscle system process	-4.64619	-2.17672	17/257	309,816,845,1264,2693,4625,4846,6442,7125,7134,7138,10203,51086,53632,84676,85366,93649	ANXA6,CAMK2B,CASQ2,CNN1,GHSR,MYH7,NOS3,SGCA,TNNC2,TNNC1,TNNT1,CALCRL,TNNI3K,PRKAG3,TRIM63,MYLK2,MYOCD
6_Member	GO Biological Processes	GO:0006937	regulation of muscle contraction	-3.66273	-1.55818	12/172	309,845,1264,2693,4625,7125,7134,7138,10203,51086,85366,93649	ANXA6,CASQ2,CNN1,GHSR,MYH7,TNNC2,TNNC1,TNNT1,CALCRL,TNNI3K,MYLK2,MYOCD
6_Member	GO Biological Processes	GO:0043501	skeletal muscle adaptation	-3.64516	-1.55818	5/28	816,4625,7134,7138,84676	CAMK2B,MYH7,TNNC1,TNNT1,TRIM63
6_Member	GO Biological Processes	GO:0014733	regulation of skeletal muscle adaptation	-3.48883	-1.46559	4/17	816,4625,7134,7138	CAMK2B,MYH7,TNNC1,TNNT1
6_Member	GO Biological Processes	GO:0006941	striated muscle contraction	-3.00593	-1.18994	11/176	845,4625,7125,7134,7138,9172,9992,10324,51086,85366,246329	CASQ2,MYH7,TNNC2,TNNC1,TNNT1,MYOM2,KCNE2,KLHL41,TNNI3K,MYLK2,STAC3
6_Member	GO Biological Processes	GO:0014888	striated muscle adaptation	-2.98742	-1.17701	6/57	816,4625,7134,7138,23493,84676	CAMK2B,MYH7,TNNC1,TNNT1,HEY2,TRIM63
6_Member	GO Biological Processes	GO:0014883	transition between fast and slow fiber	-2.91456	-1.14289	3/11	4625,7134,7138	MYH7,TNNC1,TNNT1
6_Member	GO Biological Processes	GO:0043502	regulation of muscle adaptation	-2.89088	-1.13139	8/104	816,4625,4846,6442,7134,7138,53632,84676	CAMK2B,MYH7,NOS3,SGCA,TNNC1,TNNT1,PRKAG3,TRIM63
6_Member	GO Biological Processes	GO:0003009	skeletal muscle contraction	-2.7627	-1.05565	5/43	4625,7125,7134,7138,246329	MYH7,TNNC2,TNNC1,TNNT1,STAC3
6_Member	GO Biological Processes	GO:0070252	actin-mediated cell contraction	-2.544	-0.923977	8/118	88,1674,4625,7125,7134,7138,9992,85366	ACTN2,DES,MYH7,TNNC2,TNNC1,TNNT1,KCNE2,MYLK2
6_Member	GO Biological Processes	GO:0043500	muscle adaptation	-2.52137	-0.90718	8/119	816,3553,4625,4846,7134,7138,23493,84676	CAMK2B,IL1B,MYH7,NOS3,TNNC1,TNNT1,HEY2,TRIM63
6_Member	GO Biological Processes	GO:0050879	multicellular organismal movement	-2.29092	-0.7517	5/55	4625,7125,7134,7138,246329	MYH7,TNNC2,TNNC1,TNNT1,STAC3
6_Member	GO Biological Processes	GO:0050881	musculoskeletal movement	-2.29092	-0.7517	5/55	4625,7125,7134,7138,246329	MYH7,TNNC2,TNNC1,TNNT1,STAC3
7_Summary	GO Biological Processes	GO:0051146	striated muscle cell differentiation	-6.71656	-3.41984	22/295	88,186,652,825,845,4618,4856,5915,7138,9172,9254,10324,10529,23493,27063,29765,55544,64091,93649,150094,246329,338773,2254,5600,6300,20,2817,90102,1264,2036,4070,7016,10411,351,1280,1289,1303,1627,1674,2693,3636,3861,3872,4060,4131,4281,5880,6423,55971,79983,80115,752,4625,7010,7125,7134,9992,57221,85366,342527	ACTN2,AGTR2,BMP4,CAPN3,CASQ2,MYF6,CCN3,RARB,TNNT1,MYOM2,CACNA2D2,KLHL41,NEBL,HEY2,ANKRD1,TMOD4,RBM38,POPDC2,MYOCD,SIK1,STAC3,TMEM119,FGF9,MAPK11,MAPK12,ABCA2,GPC1,PHLDB2,CNN1,EPB41L1,TACSTD2,TESK1,RAPGEF3,APP,COL2A1,COL5A1,COL12A1,DBN1,DES,GHSR,INPPL1,KRT14,KRT17,LUM,MAP1B,MID1,RAC2,SFRP2,BAIAP2L1,POF1B,BAIAP2L2,FMNL1,MYH7,TEK,TNNC2,TNNC1,KCNE2,ARFGEF3,MYLK2,SMTNL2
7_Member	GO Biological Processes	GO:0051146	striated muscle cell differentiation	-6.71656	-3.41984	22/295	88,186,652,825,845,4618,4856,5915,7138,9172,9254,10324,10529,23493,27063,29765,55544,64091,93649,150094,246329,338773	ACTN2,AGTR2,BMP4,CAPN3,CASQ2,MYF6,CCN3,RARB,TNNT1,MYOM2,CACNA2D2,KLHL41,NEBL,HEY2,ANKRD1,TMOD4,RBM38,POPDC2,MYOCD,SIK1,STAC3,TMEM119
7_Member	GO Biological Processes	GO:0042692	muscle cell differentiation	-6.33757	-3.2517	25/388	88,186,652,825,845,2254,4618,4856,5600,5915,6300,7138,9172,9254,10324,10529,23493,27063,29765,55544,64091,93649,150094,246329,338773	ACTN2,AGTR2,BMP4,CAPN3,CASQ2,FGF9,MYF6,CCN3,MAPK11,RARB,MAPK12,TNNT1,MYOM2,CACNA2D2,KLHL41,NEBL,HEY2,ANKRD1,TMOD4,RBM38,POPDC2,MYOCD,SIK1,STAC3,TMEM119
7_Member	GO Biological Processes	GO:0055002	striated muscle cell development	-5.66139	-2.8035	15/170	88,186,652,825,845,4618,7138,9172,9254,10324,10529,23493,27063,29765,246329	ACTN2,AGTR2,BMP4,CAPN3,CASQ2,MYF6,TNNT1,MYOM2,CACNA2D2,KLHL41,NEBL,HEY2,ANKRD1,TMOD4,STAC3
7_Member	GO Biological Processes	GO:0010927	cellular component assembly involved in morphogenesis	-5.47677	-2.65469	12/113	20,88,825,845,2817,7138,9172,10324,10529,27063,29765,90102	ABCA2,ACTN2,CAPN3,CASQ2,GPC1,TNNT1,MYOM2,KLHL41,NEBL,ANKRD1,TMOD4,PHLDB2
7_Member	GO Biological Processes	GO:0055001	muscle cell development	-5.26565	-2.52538	15/183	88,186,652,825,845,4618,7138,9172,9254,10324,10529,23493,27063,29765,246329	ACTN2,AGTR2,BMP4,CAPN3,CASQ2,MYF6,TNNT1,MYOM2,CACNA2D2,KLHL41,NEBL,HEY2,ANKRD1,TMOD4,STAC3
7_Member	GO Biological Processes	GO:0030239	myofibril assembly	-5.03044	-2.3747	9/68	88,825,845,7138,9172,10324,10529,27063,29765	ACTN2,CAPN3,CASQ2,TNNT1,MYOM2,KLHL41,NEBL,ANKRD1,TMOD4
7_Member	GO Biological Processes	GO:0031032	actomyosin structure organization	-4.77543	-2.24963	15/201	88,825,845,1264,2036,4070,7016,7138,9172,10324,10411,10529,27063,29765,90102	ACTN2,CAPN3,CASQ2,CNN1,EPB41L1,TACSTD2,TESK1,TNNT1,MYOM2,KLHL41,RAPGEF3,NEBL,ANKRD1,TMOD4,PHLDB2
7_Member	GO Biological Processes	GO:0045214	sarcomere organization	-4.37062	-2.02207	7/47	88,825,845,7138,9172,10324,27063	ACTN2,CAPN3,CASQ2,TNNT1,MYOM2,KLHL41,ANKRD1
7_Member	GO Biological Processes	GO:0097435	supramolecular fiber organization	-4.34297	-2.00648	31/698	88,351,825,845,1280,1289,1303,1627,1674,2693,3636,3861,3872,4060,4070,4131,4281,5880,6423,7016,7138,9172,10324,10411,10529,27063,29765,55971,79983,80115,90102	ACTN2,APP,CAPN3,CASQ2,COL2A1,COL5A1,COL12A1,DBN1,DES,GHSR,INPPL1,KRT14,KRT17,LUM,TACSTD2,MAP1B,MID1,RAC2,SFRP2,TESK1,TNNT1,MYOM2,KLHL41,RAPGEF3,NEBL,ANKRD1,TMOD4,BAIAP2L1,POF1B,BAIAP2L2,PHLDB2
7_Member	GO Biological Processes	GO:0030029	actin filament-based process	-3.77434	-1.63143	32/785	88,752,825,845,1264,1627,1674,2036,2693,3636,4070,4625,5880,7010,7016,7125,7134,7138,9172,9992,10324,10411,10529,27063,29765,55971,57221,79983,80115,85366,90102,342527	ACTN2,FMNL1,CAPN3,CASQ2,CNN1,DBN1,DES,EPB41L1,GHSR,INPPL1,TACSTD2,MYH7,RAC2,TEK,TESK1,TNNC2,TNNC1,TNNT1,MYOM2,KCNE2,KLHL41,RAPGEF3,NEBL,ANKRD1,TMOD4,BAIAP2L1,ARFGEF3,POF1B,BAIAP2L2,MYLK2,PHLDB2,SMTNL2
7_Member	GO Biological Processes	GO:0048747	muscle fiber development	-3.54757	-1.5086	7/63	652,4618,9172,9254,10324,10529,246329	BMP4,MYF6,MYOM2,CACNA2D2,KLHL41,NEBL,STAC3
7_Member	GO Biological Processes	GO:0030036	actin cytoskeleton organization	-2.67165	-0.999466	26/692	88,752,825,845,1264,1627,2036,2693,3636,4070,5880,7010,7016,7138,9172,10324,10411,10529,27063,29765,55971,57221,79983,80115,90102,342527	ACTN2,FMNL1,CAPN3,CASQ2,CNN1,DBN1,EPB41L1,GHSR,INPPL1,TACSTD2,RAC2,TEK,TESK1,TNNT1,MYOM2,KLHL41,RAPGEF3,NEBL,ANKRD1,TMOD4,BAIAP2L1,ARFGEF3,POF1B,BAIAP2L2,PHLDB2,SMTNL2
8_Summary	GO Biological Processes	GO:0043269	regulation of ion transport	-5.95758	-2.93386	35/700	88,186,288,351,760,779,816,825,845,2040,2273,2641,2745,2891,3553,3603,3747,3761,4846,5649,6569,6857,8399,9022,9254,9992,10369,51083,53826,56704,84329,117531,150094,246329,283229,5292,1138,2563,6511,10497,64091,79845,401190,6553,23315,57419	ACTN2,AGTR2,ANK3,APP,CA2,CACNA1S,CAMK2B,CAPN3,CASQ2,STOM,FHL1,GCG,GLRX,GRIA2,IL1B,IL16,KCNC2,KCNJ4,NOS3,RELN,SLC34A1,SYT1,PLA2G10,CLIC3,CACNA2D2,KCNE2,CACNG2,GAL,FXYD6,JPH1,HVCN1,TMC1,SIK1,STAC3,CRACR2B,PIM1,CHRNA5,GABRD,SLC1A6,UNC13B,POPDC2,RNF122,RGS7BP,SLC9A5,SLC9A8,SLC24A3
8_Member	GO Biological Processes	GO:0043269	regulation of ion transport	-5.95758	-2.93386	35/700	88,186,288,351,760,779,816,825,845,2040,2273,2641,2745,2891,3553,3603,3747,3761,4846,5649,6569,6857,8399,9022,9254,9992,10369,51083,53826,56704,84329,117531,150094,246329,283229	ACTN2,AGTR2,ANK3,APP,CA2,CACNA1S,CAMK2B,CAPN3,CASQ2,STOM,FHL1,GCG,GLRX,GRIA2,IL1B,IL16,KCNC2,KCNJ4,NOS3,RELN,SLC34A1,SYT1,PLA2G10,CLIC3,CACNA2D2,KCNE2,CACNG2,GAL,FXYD6,JPH1,HVCN1,TMC1,SIK1,STAC3,CRACR2B
8_Member	GO Biological Processes	GO:0022898	regulation of transmembrane transporter activity	-4.29529	-1.9804	17/274	88,288,351,845,2040,2273,2745,2891,3747,5292,5649,9992,10369,51083,53826,56704,246329	ACTN2,ANK3,APP,CASQ2,STOM,FHL1,GLRX,GRIA2,KCNC2,PIM1,RELN,KCNE2,CACNG2,GAL,FXYD6,JPH1,STAC3
8_Member	GO Biological Processes	GO:0034762	regulation of transmembrane transport	-4.29372	-1.9804	27/572	88,288,351,760,779,825,845,2040,2273,2745,2891,3553,3747,3761,5292,5649,6569,9022,9254,9992,10369,51083,53826,56704,84329,117531,246329	ACTN2,ANK3,APP,CA2,CACNA1S,CAPN3,CASQ2,STOM,FHL1,GLRX,GRIA2,IL1B,KCNC2,KCNJ4,PIM1,RELN,SLC34A1,CLIC3,CACNA2D2,KCNE2,CACNG2,GAL,FXYD6,JPH1,HVCN1,TMC1,STAC3
8_Member	GO Biological Processes	GO:0034765	regulation of ion transmembrane transport	-4.20792	-1.92718	24/484	88,288,351,779,825,845,2040,2273,2745,2891,3747,3761,5649,6569,9022,9254,9992,10369,51083,53826,56704,84329,117531,246329	ACTN2,ANK3,APP,CACNA1S,CAPN3,CASQ2,STOM,FHL1,GLRX,GRIA2,KCNC2,KCNJ4,RELN,SLC34A1,CLIC3,CACNA2D2,KCNE2,CACNG2,GAL,FXYD6,JPH1,HVCN1,TMC1,STAC3
8_Member	GO Biological Processes	GO:2001259	positive regulation of cation channel activity	-4.02239	-1.78162	8/71	88,288,3747,5649,9992,10369,51083,246329	ACTN2,ANK3,KCNC2,RELN,KCNE2,CACNG2,GAL,STAC3
8_Member	GO Biological Processes	GO:0032409	regulation of transporter activity	-4.0108	-1.77478	17/289	88,288,351,845,2040,2273,2745,2891,3747,5292,5649,9992,10369,51083,53826,56704,246329	ACTN2,ANK3,APP,CASQ2,STOM,FHL1,GLRX,GRIA2,KCNC2,PIM1,RELN,KCNE2,CACNG2,GAL,FXYD6,JPH1,STAC3
8_Member	GO Biological Processes	GO:2001257	regulation of cation channel activity	-3.9753	-1.74397	13/184	88,288,351,845,2040,2891,3747,5649,9992,10369,51083,56704,246329	ACTN2,ANK3,APP,CASQ2,STOM,GRIA2,KCNC2,RELN,KCNE2,CACNG2,GAL,JPH1,STAC3
8_Member	GO Biological Processes	GO:0032412	regulation of ion transmembrane transporter activity	-3.9395	-1.72647	16/265	88,288,351,845,2040,2273,2745,2891,3747,5649,9992,10369,51083,53826,56704,246329	ACTN2,ANK3,APP,CASQ2,STOM,FHL1,GLRX,GRIA2,KCNC2,RELN,KCNE2,CACNG2,GAL,FXYD6,JPH1,STAC3
8_Member	GO Biological Processes	GO:0043270	positive regulation of ion transport	-3.71909	-1.59463	16/277	88,288,825,2273,2641,2745,3553,3747,5649,6569,6857,8399,9992,10369,51083,246329	ACTN2,ANK3,CAPN3,FHL1,GCG,GLRX,IL1B,KCNC2,RELN,SLC34A1,SYT1,PLA2G10,KCNE2,CACNG2,GAL,STAC3
8_Member	GO Biological Processes	GO:0010959	regulation of metal ion transport	-3.67856	-1.56866	20/398	88,288,816,825,845,2040,2273,2641,2745,3603,3747,4846,9992,51083,53826,56704,117531,150094,246329,283229	ACTN2,ANK3,CAMK2B,CAPN3,CASQ2,STOM,FHL1,GCG,GLRX,IL16,KCNC2,NOS3,KCNE2,GAL,FXYD6,JPH1,TMC1,SIK1,STAC3,CRACR2B
8_Member	GO Biological Processes	GO:1904062	regulation of cation transmembrane transport	-3.57819	-1.52139	18/344	88,288,351,825,845,2040,2273,2745,2891,3747,5649,9992,10369,51083,53826,56704,117531,246329	ACTN2,ANK3,APP,CAPN3,CASQ2,STOM,FHL1,GLRX,GRIA2,KCNC2,RELN,KCNE2,CACNG2,GAL,FXYD6,JPH1,TMC1,STAC3
8_Member	GO Biological Processes	GO:0032414	positive regulation of ion transmembrane transporter activity	-3.53259	-1.5001	9/105	88,288,2745,3747,5649,9992,10369,51083,246329	ACTN2,ANK3,GLRX,KCNC2,RELN,KCNE2,CACNG2,GAL,STAC3
8_Member	GO Biological Processes	GO:1901016	regulation of potassium ion transmembrane transporter activity	-3.4629	-1.45621	7/65	88,288,845,2273,3747,9992,51083	ACTN2,ANK3,CASQ2,FHL1,KCNC2,KCNE2,GAL
8_Member	GO Biological Processes	GO:0034767	positive regulation of ion transmembrane transport	-3.44374	-1.44444	11/156	88,288,825,2745,3747,5649,6569,9992,10369,51083,246329	ACTN2,ANK3,CAPN3,GLRX,KCNC2,RELN,SLC34A1,KCNE2,CACNG2,GAL,STAC3
8_Member	GO Biological Processes	GO:0032411	positive regulation of transporter activity	-3.2963	-1.36501	9/113	88,288,2745,3747,5649,9992,10369,51083,246329	ACTN2,ANK3,GLRX,KCNC2,RELN,KCNE2,CACNG2,GAL,STAC3
8_Member	GO Biological Processes	GO:1904064	positive regulation of cation transmembrane transport	-3.12926	-1.25986	10/144	88,288,825,2745,3747,5649,9992,10369,51083,246329	ACTN2,ANK3,CAPN3,GLRX,KCNC2,RELN,KCNE2,CACNG2,GAL,STAC3
8_Member	GO Biological Processes	GO:0034764	positive regulation of transmembrane transport	-2.98005	-1.17469	12/205	88,288,760,825,2745,3747,5649,6569,9992,10369,51083,246329	ACTN2,ANK3,CA2,CAPN3,GLRX,KCNC2,RELN,SLC34A1,KCNE2,CACNG2,GAL,STAC3
8_Member	GO Biological Processes	GO:0043267	negative regulation of potassium ion transport	-2.85701	-1.1166	5/41	88,288,845,4846,9992	ACTN2,ANK3,CASQ2,NOS3,KCNE2
8_Member	GO Biological Processes	GO:0043266	regulation of potassium ion transport	-2.73499	-1.03897	8/110	88,288,845,2273,3747,4846,9992,51083	ACTN2,ANK3,CASQ2,FHL1,KCNC2,NOS3,KCNE2,GAL
8_Member	GO Biological Processes	GO:0042391	regulation of membrane potential	-2.7084	-1.0218	19/443	88,288,351,845,1138,2273,2563,2745,2891,3747,5649,6511,6569,9992,10369,10497,64091,79845,401190	ACTN2,ANK3,APP,CASQ2,CHRNA5,FHL1,GABRD,GLRX,GRIA2,KCNC2,RELN,SLC1A6,SLC34A1,KCNE2,CACNG2,UNC13B,POPDC2,RNF122,RGS7BP
8_Member	GO Biological Processes	GO:1901379	regulation of potassium ion transmembrane transport	-2.64808	-0.979747	7/89	88,288,845,2273,3747,9992,51083	ACTN2,ANK3,CASQ2,FHL1,KCNC2,KCNE2,GAL
8_Member	GO Biological Processes	GO:1901017	negative regulation of potassium ion transmembrane transporter activity	-2.57337	-0.942932	4/29	88,288,845,9992	ACTN2,ANK3,CASQ2,KCNE2
8_Member	GO Biological Processes	GO:1901380	negative regulation of potassium ion transmembrane transport	-2.36484	-0.794936	4/33	88,288,845,9992	ACTN2,ANK3,CASQ2,KCNE2
8_Member	GO Biological Processes	GO:0006813	potassium ion transport	-2.32699	-0.770759	12/246	88,288,845,2273,3747,3761,4846,6553,9992,23315,51083,57419	ACTN2,ANK3,CASQ2,FHL1,KCNC2,KCNJ4,NOS3,SLC9A5,KCNE2,SLC9A8,GAL,SLC24A3
8_Member	GO Biological Processes	GO:0071804	cellular potassium ion transport	-2.29831	-0.75556	11/217	88,288,845,2273,3747,3761,6553,9992,23315,51083,57419	ACTN2,ANK3,CASQ2,FHL1,KCNC2,KCNJ4,SLC9A5,KCNE2,SLC9A8,GAL,SLC24A3
8_Member	GO Biological Processes	GO:0071805	potassium ion transmembrane transport	-2.29831	-0.75556	11/217	88,288,845,2273,3747,3761,6553,9992,23315,51083,57419	ACTN2,ANK3,CASQ2,FHL1,KCNC2,KCNJ4,SLC9A5,KCNE2,SLC9A8,GAL,SLC24A3
9_Summary	GO Biological Processes	GO:0048589	developmental growth	-5.80288	-2.82833	34/680	186,309,347,351,652,825,1303,1627,2254,2661,2693,2735,2736,4131,4618,4856,5292,5600,5806,5915,6423,6442,6857,7869,8292,8482,9254,9423,23236,23493,23767,53335,57556,223117,2273,3487,3490,3624,3872,54825,93649,283219,2817,10324,1264,4835,8840,10203	AGTR2,ANXA6,APOD,APP,BMP4,CAPN3,COL12A1,DBN1,FGF9,GDF9,GHSR,GLI1,GLI2,MAP1B,MYF6,CCN3,PIM1,MAPK11,PTX3,RARB,SFRP2,SGCA,SYT1,SEMA3B,COLQ,SEMA7A,CACNA2D2,NTN1,PLCB1,HEY2,FLRT3,BCL11A,SEMA6A,SEMA3D,FHL1,IGFBP4,IGFBP7,INHBA,KRT17,CDHR2,MYOCD,KCTD21,GPC1,KLHL41,CNN1,NQO2,CCN4,CALCRL
9_Member	GO Biological Processes	GO:0048589	developmental growth	-5.80288	-2.82833	34/680	186,309,347,351,652,825,1303,1627,2254,2661,2693,2735,2736,4131,4618,4856,5292,5600,5806,5915,6423,6442,6857,7869,8292,8482,9254,9423,23236,23493,23767,53335,57556,223117	AGTR2,ANXA6,APOD,APP,BMP4,CAPN3,COL12A1,DBN1,FGF9,GDF9,GHSR,GLI1,GLI2,MAP1B,MYF6,CCN3,PIM1,MAPK11,PTX3,RARB,SFRP2,SGCA,SYT1,SEMA3B,COLQ,SEMA7A,CACNA2D2,NTN1,PLCB1,HEY2,FLRT3,BCL11A,SEMA6A,SEMA3D
9_Member	GO Biological Processes	GO:0048638	regulation of developmental growth	-5.47429	-2.65469	22/350	351,652,825,1627,2254,2693,2735,4131,5292,5600,6423,6857,7869,8292,8482,9254,9423,23236,23493,53335,57556,223117	APP,BMP4,CAPN3,DBN1,FGF9,GHSR,GLI1,MAP1B,PIM1,MAPK11,SFRP2,SYT1,SEMA3B,COLQ,SEMA7A,CACNA2D2,NTN1,PLCB1,HEY2,BCL11A,SEMA6A,SEMA3D
9_Member	GO Biological Processes	GO:0040008	regulation of growth	-5.2931	-2.52538	33/686	186,351,652,825,1627,2254,2273,2661,2693,2735,3487,3490,3624,3872,4131,4856,5292,5600,6423,6857,7869,8292,8482,9254,9423,23236,23493,53335,54825,57556,93649,223117,283219	AGTR2,APP,BMP4,CAPN3,DBN1,FGF9,FHL1,GDF9,GHSR,GLI1,IGFBP4,IGFBP7,INHBA,KRT17,MAP1B,CCN3,PIM1,MAPK11,SFRP2,SYT1,SEMA3B,COLQ,SEMA7A,CACNA2D2,NTN1,PLCB1,HEY2,BCL11A,CDHR2,SEMA6A,MYOCD,SEMA3D,KCTD21
9_Member	GO Biological Processes	GO:0048639	positive regulation of developmental growth	-3.85854	-1.67901	13/189	825,1627,2254,2693,2735,4131,5292,6857,8482,9254,9423,23236,23493	CAPN3,DBN1,FGF9,GHSR,GLI1,MAP1B,PIM1,SYT1,SEMA7A,CACNA2D2,NTN1,PLCB1,HEY2
9_Member	GO Biological Processes	GO:0045844	positive regulation of striated muscle tissue development	-3.47431	-1.45919	8/85	652,2254,2735,2817,4618,5292,23493,93649	BMP4,FGF9,GLI1,GPC1,MYF6,PIM1,HEY2,MYOCD
9_Member	GO Biological Processes	GO:0048636	positive regulation of muscle organ development	-3.47431	-1.45919	8/85	652,2254,2735,2817,4618,5292,23493,93649	BMP4,FGF9,GLI1,GPC1,MYF6,PIM1,HEY2,MYOCD
9_Member	GO Biological Processes	GO:1901863	positive regulation of muscle tissue development	-3.43956	-1.44444	8/86	652,2254,2735,2817,4618,5292,23493,93649	BMP4,FGF9,GLI1,GPC1,MYF6,PIM1,HEY2,MYOCD
9_Member	GO Biological Processes	GO:0045927	positive regulation of growth	-3.24512	-1.33243	15/276	825,1627,2254,2693,2735,3872,4131,5292,6423,6857,8482,9254,9423,23236,23493	CAPN3,DBN1,FGF9,GHSR,GLI1,KRT17,MAP1B,PIM1,SFRP2,SYT1,SEMA7A,CACNA2D2,NTN1,PLCB1,HEY2
9_Member	GO Biological Processes	GO:0016202	regulation of striated muscle tissue development	-2.94914	-1.16218	10/152	652,2254,2735,2817,4618,5292,5600,10324,23493,93649	BMP4,FGF9,GLI1,GPC1,MYF6,PIM1,MAPK11,KLHL41,HEY2,MYOCD
9_Member	GO Biological Processes	GO:1901861	regulation of muscle tissue development	-2.88494	-1.13139	10/155	652,2254,2735,2817,4618,5292,5600,10324,23493,93649	BMP4,FGF9,GLI1,GPC1,MYF6,PIM1,MAPK11,KLHL41,HEY2,MYOCD
9_Member	GO Biological Processes	GO:0033002	muscle cell proliferation	-2.87384	-1.12428	13/240	347,652,1264,2254,2735,4835,4856,5292,5600,8840,10203,23493,93649	APOD,BMP4,CNN1,FGF9,GLI1,NQO2,CCN3,PIM1,MAPK11,CCN4,CALCRL,HEY2,MYOCD
9_Member	GO Biological Processes	GO:0048634	regulation of muscle organ development	-2.86393	-1.12048	10/156	652,2254,2735,2817,4618,5292,5600,10324,23493,93649	BMP4,FGF9,GLI1,GPC1,MYF6,PIM1,MAPK11,KLHL41,HEY2,MYOCD
9_Member	GO Biological Processes	GO:0055025	positive regulation of cardiac muscle tissue development	-2.79544	-1.07564	6/62	652,2254,2735,5292,23493,93649	BMP4,FGF9,GLI1,PIM1,HEY2,MYOCD
9_Member	GO Biological Processes	GO:0055024	regulation of cardiac muscle tissue development	-2.34059	-0.780541	7/101	652,2254,2735,5292,5600,23493,93649	BMP4,FGF9,GLI1,PIM1,MAPK11,HEY2,MYOCD
9_Member	GO Biological Processes	GO:0060043	regulation of cardiac muscle cell proliferation	-2.19273	-0.68577	5/58	2254,2735,5292,5600,23493	FGF9,GLI1,PIM1,MAPK11,HEY2
9_Member	GO Biological Processes	GO:0060045	positive regulation of cardiac muscle cell proliferation	-2.14316	-0.649415	4/38	2254,2735,5292,23493	FGF9,GLI1,PIM1,HEY2
9_Member	GO Biological Processes	GO:0048659	smooth muscle cell proliferation	-2.07296	-0.608751	9/171	347,652,1264,2254,4835,4856,8840,10203,93649	APOD,BMP4,CNN1,FGF9,NQO2,CCN3,CCN4,CALCRL,MYOCD
9_Member	GO Biological Processes	GO:0046622	positive regulation of organ growth	-2.0426	-0.586298	5/63	2254,2735,5292,9254,23493	FGF9,GLI1,PIM1,CACNA2D2,HEY2
9_Member	GO Biological Processes	GO:0035265	organ growth	-2.03874	-0.583223	10/204	186,309,1303,2254,2735,5292,5600,5915,9254,23493	AGTR2,ANXA6,COL12A1,FGF9,GLI1,PIM1,MAPK11,RARB,CACNA2D2,HEY2
10_Summary	GO Biological Processes	GO:0001568	blood vessel development	-5.76601	-2.82147	37/777	347,652,947,1284,1289,1295,2254,2324,2693,2752,2822,3082,3553,4016,4846,4856,5175,6423,6862,7010,7045,7058,7098,7122,10203,10411,11174,23493,29775,51129,56999,57556,80781,83478,84830,90268,93649,186,309,4070,5308,5646,7869,8482,57449,84913,223117,72,2173,2735,3487,5798,9572,10468,197358	APOD,BMP4,CD34,COL4A2,COL5A1,COL8A1,FGF9,FLT4,GHSR,GLUL,GPLD1,HGF,IL1B,LOXL1,NOS3,CCN3,PECAM1,SFRP2,TBXT,TEK,TGFBI,THBS2,TLR3,CLDN5,CALCRL,RAPGEF3,ADAMTS6,HEY2,CARD10,ANGPTL4,ADAMTS9,SEMA6A,COL18A1,ARHGAP24,ADTRP,OTULIN,MYOCD,AGTR2,ANXA6,TACSTD2,PITX2,PRSS3,SEMA3B,SEMA7A,PLEKHG5,ATOH8,SEMA3D,ACTG2,FABP7,GLI1,IGFBP4,PTPRN,NR1D1,FST,NLRC3
10_Member	GO Biological Processes	GO:0001568	blood vessel development	-5.76601	-2.82147	37/777	347,652,947,1284,1289,1295,2254,2324,2693,2752,2822,3082,3553,4016,4846,4856,5175,6423,6862,7010,7045,7058,7098,7122,10203,10411,11174,23493,29775,51129,56999,57556,80781,83478,84830,90268,93649	APOD,BMP4,CD34,COL4A2,COL5A1,COL8A1,FGF9,FLT4,GHSR,GLUL,GPLD1,HGF,IL1B,LOXL1,NOS3,CCN3,PECAM1,SFRP2,TBXT,TEK,TGFBI,THBS2,TLR3,CLDN5,CALCRL,RAPGEF3,ADAMTS6,HEY2,CARD10,ANGPTL4,ADAMTS9,SEMA6A,COL18A1,ARHGAP24,ADTRP,OTULIN,MYOCD
10_Member	GO Biological Processes	GO:0001525	angiogenesis	-5.71935	-2.8035	31/594	347,652,947,1284,1295,2254,2324,2693,2752,2822,3082,3553,4846,4856,5175,6423,7010,7045,7058,7098,7122,10203,10411,29775,51129,56999,57556,80781,83478,84830,90268	APOD,BMP4,CD34,COL4A2,COL8A1,FGF9,FLT4,GHSR,GLUL,GPLD1,HGF,IL1B,NOS3,CCN3,PECAM1,SFRP2,TEK,TGFBI,THBS2,TLR3,CLDN5,CALCRL,RAPGEF3,CARD10,ANGPTL4,ADAMTS9,SEMA6A,COL18A1,ARHGAP24,ADTRP,OTULIN
10_Member	GO Biological Processes	GO:0048514	blood vessel morphogenesis	-5.66351	-2.8035	34/690	347,652,947,1284,1295,2254,2324,2693,2752,2822,3082,3553,4846,4856,5175,6423,6862,7010,7045,7058,7098,7122,10203,10411,23493,29775,51129,56999,57556,80781,83478,84830,90268,93649	APOD,BMP4,CD34,COL4A2,COL8A1,FGF9,FLT4,GHSR,GLUL,GPLD1,HGF,IL1B,NOS3,CCN3,PECAM1,SFRP2,TBXT,TEK,TGFBI,THBS2,TLR3,CLDN5,CALCRL,RAPGEF3,HEY2,CARD10,ANGPTL4,ADAMTS9,SEMA6A,COL18A1,ARHGAP24,ADTRP,OTULIN,MYOCD
10_Member	GO Biological Processes	GO:0001667	ameboidal-type cell migration	-3.94445	-1.72691	23/472	186,309,652,2324,2752,2822,4070,4846,4856,5175,5308,5646,6862,7010,7869,8482,29775,56999,57449,57556,84830,84913,223117	AGTR2,ANXA6,BMP4,FLT4,GLUL,GPLD1,TACSTD2,NOS3,CCN3,PECAM1,PITX2,PRSS3,TBXT,TEK,SEMA3B,SEMA7A,CARD10,ADAMTS9,PLEKHG5,SEMA6A,ADTRP,ATOH8,SEMA3D
10_Member	GO Biological Processes	GO:1901342	regulation of vasculature development	-3.61059	-1.53135	21/434	652,947,1284,2254,2693,2752,3082,3553,4846,6423,7010,7058,7098,7122,10411,23493,29775,51129,56999,57556,93649	BMP4,CD34,COL4A2,FGF9,GHSR,GLUL,HGF,IL1B,NOS3,SFRP2,TEK,THBS2,TLR3,CLDN5,RAPGEF3,HEY2,CARD10,ANGPTL4,ADAMTS9,SEMA6A,MYOCD
10_Member	GO Biological Processes	GO:0090130	tissue migration	-3.23082	-1.32327	18/368	72,186,652,2324,2752,2822,4070,4846,4856,5175,5646,6862,7010,29775,56999,57449,84830,84913	ACTG2,AGTR2,BMP4,FLT4,GLUL,GPLD1,TACSTD2,NOS3,CCN3,PECAM1,PRSS3,TBXT,TEK,CARD10,ADAMTS9,PLEKHG5,ADTRP,ATOH8
10_Member	GO Biological Processes	GO:0043542	endothelial cell migration	-3.18081	-1.29063	15/280	186,652,2324,2752,2822,4846,4856,5175,5646,7010,29775,56999,57449,84830,84913	AGTR2,BMP4,FLT4,GLUL,GPLD1,NOS3,CCN3,PECAM1,PRSS3,TEK,CARD10,ADAMTS9,PLEKHG5,ADTRP,ATOH8
10_Member	GO Biological Processes	GO:0050673	epithelial cell proliferation	-2.94869	-1.16218	20/455	652,947,1295,2173,2254,2324,2693,2735,2752,3082,3487,4070,4856,5798,6423,7010,9572,10468,84913,197358	BMP4,CD34,COL8A1,FABP7,FGF9,FLT4,GHSR,GLI1,GLUL,HGF,IGFBP4,TACSTD2,CCN3,PTPRN,SFRP2,TEK,NR1D1,FST,ATOH8,NLRC3
10_Member	GO Biological Processes	GO:0002040	sprouting angiogenesis	-2.77555	-1.0671	11/188	652,2324,2693,2752,2822,7010,29775,56999,57556,84830,90268	BMP4,FLT4,GHSR,GLUL,GPLD1,TEK,CARD10,ADAMTS9,SEMA6A,ADTRP,OTULIN
10_Member	GO Biological Processes	GO:0045765	regulation of angiogenesis	-2.52956	-0.911816	17/392	947,1284,2693,2752,3082,3553,4846,6423,7010,7058,7098,7122,10411,29775,51129,56999,57556	CD34,COL4A2,GHSR,GLUL,HGF,IL1B,NOS3,SFRP2,TEK,THBS2,TLR3,CLDN5,RAPGEF3,CARD10,ANGPTL4,ADAMTS9,SEMA6A
10_Member	GO Biological Processes	GO:0010631	epithelial cell migration	-2.52741	-0.9108	16/359	186,652,2324,2752,2822,4070,4846,4856,5175,5646,7010,29775,56999,57449,84830,84913	AGTR2,BMP4,FLT4,GLUL,GPLD1,TACSTD2,NOS3,CCN3,PECAM1,PRSS3,TEK,CARD10,ADAMTS9,PLEKHG5,ADTRP,ATOH8
10_Member	GO Biological Processes	GO:0090132	epithelium migration	-2.4922	-0.885674	16/362	186,652,2324,2752,2822,4070,4846,4856,5175,5646,7010,29775,56999,57449,84830,84913	AGTR2,BMP4,FLT4,GLUL,GPLD1,TACSTD2,NOS3,CCN3,PECAM1,PRSS3,TEK,CARD10,ADAMTS9,PLEKHG5,ADTRP,ATOH8
10_Member	GO Biological Processes	GO:1901343	negative regulation of vasculature development	-2.18527	-0.680244	10/194	652,1284,2254,7010,7058,7122,23493,29775,56999,57556	BMP4,COL4A2,FGF9,TEK,THBS2,CLDN5,HEY2,CARD10,ADAMTS9,SEMA6A
10_Member	GO Biological Processes	GO:1904018	positive regulation of vasculature development	-2.07463	-0.608751	11/233	947,2693,3082,3553,4846,6423,7010,7098,10411,51129,93649	CD34,GHSR,HGF,IL1B,NOS3,SFRP2,TEK,TLR3,RAPGEF3,ANGPTL4,MYOCD
10_Member	GO Biological Processes	GO:0045766	positive regulation of angiogenesis	-2.01076	-0.566061	10/206	947,2693,3082,3553,4846,6423,7010,7098,10411,51129	CD34,GHSR,HGF,IL1B,NOS3,SFRP2,TEK,TLR3,RAPGEF3,ANGPTL4
11_Summary	GO Biological Processes	GO:0043434	response to peptide hormone	-5.3027	-2.52538	25/443	88,108,186,760,2641,2693,2740,2822,3553,3625,3636,3795,4131,4519,5166,5251,5798,5919,6430,6569,6773,7010,7352,51083,55971,351,55765,652,3490,3624,4537,5729,5915,9572,23236,56937,84830,779,845,3747,6263,7098,10411,53335	ACTN2,ADCY2,AGTR2,CA2,GCG,GHSR,GLP1R,GPLD1,IL1B,INHBB,INPPL1,KHK,MAP1B,CYTB,PDK4,PHEX,PTPRN,RARRES2,SRSF5,SLC34A1,STAT2,TEK,UCP3,GAL,BAIAP2L1,APP,INAVA,BMP4,IGFBP7,INHBA,ND3,PTGDR,RARB,NR1D1,PLCB1,PMEPA1,ADTRP,CACNA1S,CASQ2,KCNC2,RYR3,TLR3,RAPGEF3,BCL11A
11_Member	GO Biological Processes	GO:0043434	response to peptide hormone	-5.3027	-2.52538	25/443	88,108,186,760,2641,2693,2740,2822,3553,3625,3636,3795,4131,4519,5166,5251,5798,5919,6430,6569,6773,7010,7352,51083,55971	ACTN2,ADCY2,AGTR2,CA2,GCG,GHSR,GLP1R,GPLD1,IL1B,INHBB,INPPL1,KHK,MAP1B,CYTB,PDK4,PHEX,PTPRN,RARRES2,SRSF5,SLC34A1,STAT2,TEK,UCP3,GAL,BAIAP2L1
11_Member	GO Biological Processes	GO:1901652	response to peptide	-4.81001	-2.25366	27/534	88,108,186,351,760,2641,2693,2740,2822,3553,3625,3636,3795,4131,4519,5166,5251,5798,5919,6430,6569,6773,7010,7352,51083,55765,55971	ACTN2,ADCY2,AGTR2,APP,CA2,GCG,GHSR,GLP1R,GPLD1,IL1B,INHBB,INPPL1,KHK,MAP1B,CYTB,PDK4,PHEX,PTPRN,RARRES2,SRSF5,SLC34A1,STAT2,TEK,UCP3,GAL,INAVA,BAIAP2L1
11_Member	GO Biological Processes	GO:0032870	cellular response to hormone stimulus	-3.1306	-1.25986	28/712	88,108,186,652,760,2641,2693,2740,2822,3490,3553,3624,3625,4131,4537,5166,5251,5729,5915,5919,6430,6569,7352,9572,23236,55971,56937,84830	ACTN2,ADCY2,AGTR2,BMP4,CA2,GCG,GHSR,GLP1R,GPLD1,IGFBP7,IL1B,INHBA,INHBB,MAP1B,ND3,PDK4,PHEX,PTGDR,RARB,RARRES2,SRSF5,SLC34A1,UCP3,NR1D1,PLCB1,BAIAP2L1,PMEPA1,ADTRP
11_Member	GO Biological Processes	GO:1901699	cellular response to nitrogen compound	-2.6361	-0.97241	25/660	88,108,186,351,760,779,845,2641,2693,2740,2822,3553,3625,3747,4131,5166,5919,6263,6430,6569,7098,10411,23236,53335,55971	ACTN2,ADCY2,AGTR2,APP,CA2,CACNA1S,CASQ2,GCG,GHSR,GLP1R,GPLD1,IL1B,INHBB,KCNC2,MAP1B,PDK4,RARRES2,RYR3,SRSF5,SLC34A1,TLR3,RAPGEF3,PLCB1,BCL11A,BAIAP2L1
11_Member	GO Biological Processes	GO:0071375	cellular response to peptide hormone stimulus	-2.51928	-0.90718	15/327	88,108,186,760,2641,2693,2740,2822,3553,3625,4131,5166,5919,6430,55971	ACTN2,ADCY2,AGTR2,CA2,GCG,GHSR,GLP1R,GPLD1,IL1B,INHBB,MAP1B,PDK4,RARRES2,SRSF5,BAIAP2L1
11_Member	GO Biological Processes	GO:0032868	response to insulin	-2.31023	-0.764597	13/279	2693,2822,3553,3625,3636,3795,5166,5798,5919,6430,7352,51083,55971	GHSR,GPLD1,IL1B,INHBB,INPPL1,KHK,PDK4,PTPRN,RARRES2,SRSF5,UCP3,GAL,BAIAP2L1
11_Member	GO Biological Processes	GO:0071417	cellular response to organonitrogen compound	-2.24733	-0.717767	22/597	88,108,186,351,760,779,845,2641,2693,2740,2822,3553,3625,4131,5166,5919,6263,6430,6569,10411,53335,55971	ACTN2,ADCY2,AGTR2,APP,CA2,CACNA1S,CASQ2,GCG,GHSR,GLP1R,GPLD1,IL1B,INHBB,MAP1B,PDK4,RARRES2,RYR3,SRSF5,SLC34A1,RAPGEF3,BCL11A,BAIAP2L1
11_Member	GO Biological Processes	GO:1901653	cellular response to peptide	-2.11553	-0.632635	16/397	88,108,186,351,760,2641,2693,2740,2822,3553,3625,4131,5166,5919,6430,55971	ACTN2,ADCY2,AGTR2,APP,CA2,GCG,GHSR,GLP1R,GPLD1,IL1B,INHBB,MAP1B,PDK4,RARRES2,SRSF5,BAIAP2L1
12_Summary	GO Biological Processes	GO:0010035	response to inorganic substance	-5.2628	-2.52538	29/564	288,351,760,825,845,2822,3082,3747,3795,3861,4131,4519,4540,4541,4846,4982,5251,6263,6569,6857,7134,7352,8604,10272,10369,23400,80781,84329,387758	ANK3,APP,CA2,CAPN3,CASQ2,GPLD1,HGF,KCNC2,KHK,KRT14,MAP1B,CYTB,ND5,ND6,NOS3,TNFRSF11B,PHEX,RYR3,SLC34A1,SYT1,TNNC1,UCP3,SLC25A12,FSTL3,CACNG2,ATP13A2,COL18A1,HVCN1,FIBIN
12_Member	GO Biological Processes	GO:0010035	response to inorganic substance	-5.2628	-2.52538	29/564	288,351,760,825,845,2822,3082,3747,3795,3861,4131,4519,4540,4541,4846,4982,5251,6263,6569,6857,7134,7352,8604,10272,10369,23400,80781,84329,387758	ANK3,APP,CA2,CAPN3,CASQ2,GPLD1,HGF,KCNC2,KHK,KRT14,MAP1B,CYTB,ND5,ND6,NOS3,TNFRSF11B,PHEX,RYR3,SLC34A1,SYT1,TNNC1,UCP3,SLC25A12,FSTL3,CACNG2,ATP13A2,COL18A1,HVCN1,FIBIN
12_Member	GO Biological Processes	GO:0010038	response to metal ion	-4.70765	-2.22257	21/363	288,351,760,825,845,2822,3747,3795,3861,4519,4982,6263,6569,6857,7134,8604,10272,10369,23400,84329,387758	ANK3,APP,CA2,CAPN3,CASQ2,GPLD1,KCNC2,KHK,KRT14,CYTB,TNFRSF11B,RYR3,SLC34A1,SYT1,TNNC1,SLC25A12,FSTL3,CACNG2,ATP13A2,HVCN1,FIBIN
12_Member	GO Biological Processes	GO:0071241	cellular response to inorganic substance	-2.26897	-0.733797	11/219	288,351,825,2822,3747,6263,6569,6857,10272,23400,84329	ANK3,APP,CAPN3,GPLD1,KCNC2,RYR3,SLC34A1,SYT1,FSTL3,ATP13A2,HVCN1
12_Member	GO Biological Processes	GO:0071248	cellular response to metal ion	-2.2315	-0.706066	10/191	288,351,825,2822,6263,6569,6857,10272,23400,84329	ANK3,APP,CAPN3,GPLD1,RYR3,SLC34A1,SYT1,FSTL3,ATP13A2,HVCN1
13_Summary	GO Biological Processes	GO:0045596	negative regulation of cell differentiation	-5.17916	-2.47071	35/759	351,652,1289,2192,2254,2736,3199,3218,3553,3624,4070,4856,5915,6423,7098,7869,8482,8840,9423,9572,10220,10272,10468,22852,23108,23493,53335,57556,93649,117581,148979,157285,223117,283659,338773,186,2273,2661,54825,309,5308,5600,23767,2324,2822,3082,3603,3674,4846,5175,5293,5649,5880,5919,7010,80781,81029,84913,1627,3487,3490,3872,4131,6857,72,90102,347,2693,7122,23236,29775,56999,84830,127435,281…	APP,BMP4,COL5A1,FBLN1,FGF9,GLI2,HOXA2,HOXB8,IL1B,INHBA,TACSTD2,CCN3,RARB,SFRP2,TLR3,SEMA3B,SEMA7A,CCN4,NTN1,NR1D1,GDF11,FSTL3,FST,ANKRD26,RAP1GAP2,HEY2,BCL11A,SEMA6A,MYOCD,TWIST2,GLIS1,PRAG1,SEMA3D,PRTG,TMEM119,AGTR2,FHL1,GDF9,CDHR2,ANXA6,PITX2,MAPK11,FLRT3,FLT4,GPLD1,HGF,IL16,ITGA2B,NOS3,PECAM1,PIK3CD,RELN,RAC2,RARRES2,TEK,COL18A1,WNT5B,ATOH8,DBN1,IGFBP4,IGFBP7,KRT17,MAP1B,SYT1,ACTG2,PHLDB2,APOD…
13_Member	GO Biological Processes	GO:0045596	negative regulation of cell differentiation	-5.17916	-2.47071	35/759	351,652,1289,2192,2254,2736,3199,3218,3553,3624,4070,4856,5915,6423,7098,7869,8482,8840,9423,9572,10220,10272,10468,22852,23108,23493,53335,57556,93649,117581,148979,157285,223117,283659,338773	APP,BMP4,COL5A1,FBLN1,FGF9,GLI2,HOXA2,HOXB8,IL1B,INHBA,TACSTD2,CCN3,RARB,SFRP2,TLR3,SEMA3B,SEMA7A,CCN4,NTN1,NR1D1,GDF11,FSTL3,FST,ANKRD26,RAP1GAP2,HEY2,BCL11A,SEMA6A,MYOCD,TWIST2,GLIS1,PRAG1,SEMA3D,PRTG,TMEM119
13_Member	GO Biological Processes	GO:0030308	negative regulation of cell growth	-3.92808	-1.7239	13/186	186,2273,2661,3624,4856,6423,7869,8482,9423,53335,54825,57556,223117	AGTR2,FHL1,GDF9,INHBA,CCN3,SFRP2,SEMA3B,SEMA7A,NTN1,BCL11A,CDHR2,SEMA6A,SEMA3D
13_Member	GO Biological Processes	GO:0001755	neural crest cell migration	-3.92259	-1.72278	7/55	309,652,5308,7869,8482,57556,223117	ANXA6,BMP4,PITX2,SEMA3B,SEMA7A,SEMA6A,SEMA3D
13_Member	GO Biological Processes	GO:0045926	negative regulation of growth	-3.70004	-1.57941	15/250	186,652,2273,2661,3624,4856,5600,6423,7869,8482,9423,53335,54825,57556,223117	AGTR2,BMP4,FHL1,GDF9,INHBA,CCN3,MAPK11,SFRP2,SEMA3B,SEMA7A,NTN1,BCL11A,CDHR2,SEMA6A,SEMA3D
13_Member	GO Biological Processes	GO:0050919	negative chemotaxis	-3.54729	-1.5086	6/45	7869,8482,9423,23767,57556,223117	SEMA3B,SEMA7A,NTN1,FLRT3,SEMA6A,SEMA3D
13_Member	GO Biological Processes	GO:0014031	mesenchymal cell development	-3.54539	-1.5086	8/83	309,652,5308,7869,8482,23493,57556,223117	ANXA6,BMP4,PITX2,SEMA3B,SEMA7A,HEY2,SEMA6A,SEMA3D
13_Member	GO Biological Processes	GO:0040017	positive regulation of locomotion	-3.43743	-1.44444	26/612	351,652,2254,2324,2822,3082,3553,3603,3674,4846,5175,5293,5649,5880,5919,7010,7869,8482,8840,9423,57556,80781,81029,84913,117581,223117	APP,BMP4,FGF9,FLT4,GPLD1,HGF,IL1B,IL16,ITGA2B,NOS3,PECAM1,PIK3CD,RELN,RAC2,RARRES2,TEK,SEMA3B,SEMA7A,CCN4,NTN1,SEMA6A,COL18A1,WNT5B,ATOH8,TWIST2,SEMA3D
13_Member	GO Biological Processes	GO:2000147	positive regulation of cell motility	-3.37506	-1.41078	25/584	351,652,2254,2324,2822,3082,3553,3674,4846,5175,5293,5649,5880,5919,7010,7869,8482,8840,9423,57556,80781,81029,84913,117581,223117	APP,BMP4,FGF9,FLT4,GPLD1,HGF,IL1B,ITGA2B,NOS3,PECAM1,PIK3CD,RELN,RAC2,RARRES2,TEK,SEMA3B,SEMA7A,CCN4,NTN1,SEMA6A,COL18A1,WNT5B,ATOH8,TWIST2,SEMA3D
13_Member	GO Biological Processes	GO:0001558	regulation of cell growth	-3.36446	-1.4027	20/421	186,1627,2273,2661,3487,3490,3624,3872,4131,4856,6423,6857,7869,8482,9423,53335,54825,57556,93649,223117	AGTR2,DBN1,FHL1,GDF9,IGFBP4,IGFBP7,INHBA,KRT17,MAP1B,CCN3,SFRP2,SYT1,SEMA3B,SEMA7A,NTN1,BCL11A,CDHR2,SEMA6A,MYOCD,SEMA3D
13_Member	GO Biological Processes	GO:0016049	cell growth	-3.30948	-1.36974	22/490	186,351,1627,2273,2661,3487,3490,3624,3872,4131,4856,6423,6857,7869,8482,9423,23767,53335,54825,57556,93649,223117	AGTR2,APP,DBN1,FHL1,GDF9,IGFBP4,IGFBP7,INHBA,KRT17,MAP1B,CCN3,SFRP2,SYT1,SEMA3B,SEMA7A,NTN1,FLRT3,BCL11A,CDHR2,SEMA6A,MYOCD,SEMA3D
13_Member	GO Biological Processes	GO:0048640	negative regulation of developmental growth	-3.2963	-1.36501	9/113	652,5600,6423,7869,8482,9423,53335,57556,223117	BMP4,MAPK11,SFRP2,SEMA3B,SEMA7A,NTN1,BCL11A,SEMA6A,SEMA3D
13_Member	GO Biological Processes	GO:0030335	positive regulation of cell migration	-3.26958	-1.3508	24/560	351,652,2254,2324,2822,3082,3553,3674,4846,5175,5293,5649,5880,5919,7010,7869,8482,8840,57556,80781,81029,84913,117581,223117	APP,BMP4,FGF9,FLT4,GPLD1,HGF,IL1B,ITGA2B,NOS3,PECAM1,PIK3CD,RELN,RAC2,RARRES2,TEK,SEMA3B,SEMA7A,CCN4,SEMA6A,COL18A1,WNT5B,ATOH8,TWIST2,SEMA3D
13_Member	GO Biological Processes	GO:0060485	mesenchyme development	-3.21279	-1.30744	15/278	72,309,652,2254,3082,3553,4846,5308,6423,7869,8482,23493,57556,90102,223117	ACTG2,ANXA6,BMP4,FGF9,HGF,IL1B,NOS3,PITX2,SFRP2,SEMA3B,SEMA7A,HEY2,SEMA6A,PHLDB2,SEMA3D
13_Member	GO Biological Processes	GO:0040013	negative regulation of locomotion	-3.19804	-1.29898	19/402	186,347,2192,2693,4070,4856,6423,7122,7869,8482,23236,29775,56999,57556,84830,90102,93649,127435,223117	AGTR2,APOD,FBLN1,GHSR,TACSTD2,CCN3,SFRP2,CLDN5,SEMA3B,SEMA7A,PLCB1,CARD10,ADAMTS9,SEMA6A,ADTRP,PHLDB2,MYOCD,PODN,SEMA3D
13_Member	GO Biological Processes	GO:0051272	positive regulation of cellular component movement	-3.1949	-1.29898	25/601	351,652,2254,2324,2822,3082,3553,3674,4846,5175,5293,5649,5880,5919,7010,7869,8482,8840,9423,57556,80781,81029,84913,117581,223117	APP,BMP4,FGF9,FLT4,GPLD1,HGF,IL1B,ITGA2B,NOS3,PECAM1,PIK3CD,RELN,RAC2,RARRES2,TEK,SEMA3B,SEMA7A,CCN4,NTN1,SEMA6A,COL18A1,WNT5B,ATOH8,TWIST2,SEMA3D
13_Member	GO Biological Processes	GO:0007411	axon guidance	-3.18081	-1.29063	15/280	351,2736,2817,3199,5293,5649,5880,5909,7869,8399,8482,9423,23767,57556,223117	APP,GLI2,GPC1,HOXA2,PIK3CD,RELN,RAC2,RAP1GAP,SEMA3B,PLA2G10,SEMA7A,NTN1,FLRT3,SEMA6A,SEMA3D
13_Member	GO Biological Processes	GO:0097485	neuron projection guidance	-3.14918	-1.27159	15/282	351,2736,2817,3199,5293,5649,5880,5909,7869,8399,8482,9423,23767,57556,223117	APP,GLI2,GPC1,HOXA2,PIK3CD,RELN,RAC2,RAP1GAP,SEMA3B,PLA2G10,SEMA7A,NTN1,FLRT3,SEMA6A,SEMA3D
13_Member	GO Biological Processes	GO:0060560	developmental growth involved in morphogenesis	-2.95636	-1.16218	13/235	351,652,1627,4131,6423,6857,7869,8482,9423,23767,53335,57556,223117	APP,BMP4,DBN1,MAP1B,SFRP2,SYT1,SEMA3B,SEMA7A,NTN1,FLRT3,BCL11A,SEMA6A,SEMA3D
13_Member	GO Biological Processes	GO:0014032	neural crest cell development	-2.94899	-1.16218	7/79	309,652,5308,7869,8482,57556,223117	ANXA6,BMP4,PITX2,SEMA3B,SEMA7A,SEMA6A,SEMA3D
13_Member	GO Biological Processes	GO:0051271	negative regulation of cellular component movement	-2.94292	-1.15809	18/390	186,347,2192,4070,4856,6423,7122,7869,8482,23236,29775,56999,57556,84830,90102,93649,127435,223117	AGTR2,APOD,FBLN1,TACSTD2,CCN3,SFRP2,CLDN5,SEMA3B,SEMA7A,PLCB1,CARD10,ADAMTS9,SEMA6A,ADTRP,PHLDB2,MYOCD,PODN,SEMA3D
13_Member	GO Biological Processes	GO:0048588	developmental cell growth	-2.93964	-1.15647	13/236	186,351,1627,2661,4131,6857,7869,8482,9423,23767,53335,57556,223117	AGTR2,APP,DBN1,GDF9,MAP1B,SYT1,SEMA3B,SEMA7A,NTN1,FLRT3,BCL11A,SEMA6A,SEMA3D
13_Member	GO Biological Processes	GO:0045664	regulation of neuron differentiation	-2.89241	-1.13139	26/667	351,652,816,1627,2736,3082,3199,4131,5649,5792,5915,6423,6857,7869,8482,9423,10220,23108,23493,27063,53335,57556,91752,157285,221938,223117	APP,BMP4,CAMK2B,DBN1,GLI2,HGF,HOXA2,MAP1B,RELN,PTPRF,RARB,SFRP2,SYT1,SEMA3B,SEMA7A,NTN1,GDF11,RAP1GAP2,HEY2,ANKRD1,BCL11A,SEMA6A,ZNF804A,PRAG1,MMD2,SEMA3D
13_Member	GO Biological Processes	GO:0048864	stem cell development	-2.82303	-1.0886	7/83	309,652,5308,7869,8482,57556,223117	ANXA6,BMP4,PITX2,SEMA3B,SEMA7A,SEMA6A,SEMA3D
13_Member	GO Biological Processes	GO:0048843	negative regulation of axon extension involved in axon guidance	-2.81916	-1.08769	4/25	7869,8482,57556,223117	SEMA3B,SEMA7A,SEMA6A,SEMA3D
13_Member	GO Biological Processes	GO:0030517	negative regulation of axon extension	-2.80918	-1.08066	5/42	7869,8482,9423,57556,223117	SEMA3B,SEMA7A,NTN1,SEMA6A,SEMA3D
13_Member	GO Biological Processes	GO:0048762	mesenchymal cell differentiation	-2.75305	-1.04879	12/218	309,652,3082,3553,5308,6423,7869,8482,23493,57556,90102,223117	ANXA6,BMP4,HGF,IL1B,PITX2,SFRP2,SEMA3B,SEMA7A,HEY2,SEMA6A,PHLDB2,SEMA3D
13_Member	GO Biological Processes	GO:0000904	cell morphogenesis involved in differentiation	-2.74497	-1.04347	28/756	288,351,816,1009,1303,1627,2192,2736,2817,3199,4070,4131,5175,5293,5649,5880,5909,7010,7869,8399,8482,9423,23767,57556,79983,80781,201294,223117	ANK3,APP,CAMK2B,CDH11,COL12A1,DBN1,FBLN1,GLI2,GPC1,HOXA2,TACSTD2,MAP1B,PECAM1,PIK3CD,RELN,RAC2,RAP1GAP,TEK,SEMA3B,PLA2G10,SEMA7A,NTN1,FLRT3,SEMA6A,POF1B,COL18A1,UNC13D,SEMA3D
13_Member	GO Biological Processes	GO:0010721	negative regulation of cell development	-2.73664	-1.03904	16/342	351,2192,3199,3553,4070,7869,8482,9423,9572,10220,23108,53335,57556,157285,223117,283659	APP,FBLN1,HOXA2,IL1B,TACSTD2,SEMA3B,SEMA7A,NTN1,NR1D1,GDF11,RAP1GAP2,BCL11A,SEMA6A,PRAG1,SEMA3D,PRTG
13_Member	GO Biological Processes	GO:0006935	chemotaxis	-2.73301	-1.03835	25/649	351,652,2207,2736,2817,3082,3199,3553,3603,3950,4856,5293,5649,5880,5909,5919,7869,8399,8482,9423,23767,51554,57449,57556,223117	APP,BMP4,FCER1G,GLI2,GPC1,HGF,HOXA2,IL1B,IL16,LECT2,CCN3,PIK3CD,RELN,RAC2,RAP1GAP,RARRES2,SEMA3B,PLA2G10,SEMA7A,NTN1,FLRT3,ACKR4,PLEKHG5,SEMA6A,SEMA3D
13_Member	GO Biological Processes	GO:0042330	taxis	-2.71516	-1.02589	25/651	351,652,2207,2736,2817,3082,3199,3553,3603,3950,4856,5293,5649,5880,5909,5919,7869,8399,8482,9423,23767,51554,57449,57556,223117	APP,BMP4,FCER1G,GLI2,GPC1,HGF,HOXA2,IL1B,IL16,LECT2,CCN3,PIK3CD,RELN,RAC2,RAP1GAP,RARRES2,SEMA3B,PLA2G10,SEMA7A,NTN1,FLRT3,ACKR4,PLEKHG5,SEMA6A,SEMA3D
13_Member	GO Biological Processes	GO:1902668	negative regulation of axon guidance	-2.69088	-1.01145	4/27	7869,8482,57556,223117	SEMA3B,SEMA7A,SEMA6A,SEMA3D
13_Member	GO Biological Processes	GO:0051129	negative regulation of cellular component organization	-2.67955	-1.00349	28/764	20,347,351,652,2192,3082,3553,3834,4070,4131,4281,5909,7869,8482,9423,10411,23108,23493,29765,53335,55529,56937,57556,84830,90102,157285,197358,223117	ABCA2,APOD,APP,BMP4,FBLN1,HGF,IL1B,KIF25,TACSTD2,MAP1B,MID1,RAP1GAP,SEMA3B,SEMA7A,NTN1,RAPGEF3,RAP1GAP2,HEY2,TMOD4,BCL11A,PIP4P2,PMEPA1,SEMA6A,ADTRP,PHLDB2,PRAG1,NLRC3,SEMA3D
13_Member	GO Biological Processes	GO:0014033	neural crest cell differentiation	-2.67615	-1.00139	7/88	309,652,5308,7869,8482,57556,223117	ANXA6,BMP4,PITX2,SEMA3B,SEMA7A,SEMA6A,SEMA3D
13_Member	GO Biological Processes	GO:1990138	neuron projection extension	-2.56995	-0.940686	10/171	1627,4131,6857,7869,8482,9423,23767,53335,57556,223117	DBN1,MAP1B,SYT1,SEMA3B,SEMA7A,NTN1,FLRT3,BCL11A,SEMA6A,SEMA3D
13_Member	GO Biological Processes	GO:0061564	axon development	-2.56121	-0.937272	21/526	288,347,351,1009,1627,2736,2817,3199,4131,5293,5649,5792,5880,5909,7869,8399,8482,9423,23767,57556,223117	ANK3,APOD,APP,CDH11,DBN1,GLI2,GPC1,HOXA2,MAP1B,PIK3CD,RELN,PTPRF,RAC2,RAP1GAP,SEMA3B,PLA2G10,SEMA7A,NTN1,FLRT3,SEMA6A,SEMA3D
13_Member	GO Biological Processes	GO:0050768	negative regulation of neurogenesis	-2.53117	-0.91228	14/294	351,3199,3553,7869,8482,9423,9572,10220,23108,53335,57556,157285,223117,283659	APP,HOXA2,IL1B,SEMA3B,SEMA7A,NTN1,NR1D1,GDF11,RAP1GAP2,BCL11A,SEMA6A,PRAG1,SEMA3D,PRTG
13_Member	GO Biological Processes	GO:0048841	regulation of axon extension involved in axon guidance	-2.46509	-0.860381	4/31	7869,8482,57556,223117	SEMA3B,SEMA7A,SEMA6A,SEMA3D
13_Member	GO Biological Processes	GO:0010771	negative regulation of cell morphogenesis involved in differentiation	-2.43745	-0.842073	7/97	2192,4070,7869,8482,9423,57556,223117	FBLN1,TACSTD2,SEMA3B,SEMA7A,NTN1,SEMA6A,SEMA3D
13_Member	GO Biological Processes	GO:0030516	regulation of axon extension	-2.43745	-0.842073	7/97	1627,4131,7869,8482,9423,57556,223117	DBN1,MAP1B,SEMA3B,SEMA7A,NTN1,SEMA6A,SEMA3D
13_Member	GO Biological Processes	GO:0007409	axonogenesis	-2.34869	-0.780541	19/478	288,351,1009,1627,2736,2817,3199,4131,5293,5649,5880,5909,7869,8399,8482,9423,23767,57556,223117	ANK3,APP,CDH11,DBN1,GLI2,GPC1,HOXA2,MAP1B,PIK3CD,RELN,RAC2,RAP1GAP,SEMA3B,PLA2G10,SEMA7A,NTN1,FLRT3,SEMA6A,SEMA3D
13_Member	GO Biological Processes	GO:0051962	positive regulation of nervous system development	-2.32173	-0.768651	21/552	652,816,1627,2735,2736,3082,3553,4131,5649,5915,6857,7058,8482,8604,9423,23767,27063,57556,91752,118738,221938	BMP4,CAMK2B,DBN1,GLI1,GLI2,HGF,IL1B,MAP1B,RELN,RARB,SYT1,THBS2,SEMA7A,SLC25A12,NTN1,FLRT3,ANKRD1,SEMA6A,ZNF804A,ZNF488,MMD2
13_Member	GO Biological Processes	GO:0031345	negative regulation of cell projection organization	-2.31104	-0.764597	10/186	4070,5909,7869,8482,9423,23108,53335,57556,157285,223117	TACSTD2,RAP1GAP,SEMA3B,SEMA7A,NTN1,RAP1GAP2,BCL11A,SEMA6A,PRAG1,SEMA3D
13_Member	GO Biological Processes	GO:0051961	negative regulation of nervous system development	-2.24454	-0.716823	14/317	351,3199,3553,7869,8482,9423,9572,10220,23108,53335,57556,157285,223117,283659	APP,HOXA2,IL1B,SEMA3B,SEMA7A,NTN1,NR1D1,GDF11,RAP1GAP2,BCL11A,SEMA6A,PRAG1,SEMA3D,PRTG
13_Member	GO Biological Processes	GO:0048846	axon extension involved in axon guidance	-2.22736	-0.706066	4/36	7869,8482,57556,223117	SEMA3B,SEMA7A,SEMA6A,SEMA3D
13_Member	GO Biological Processes	GO:1902284	neuron projection extension involved in neuron projection guidance	-2.22736	-0.706066	4/36	7869,8482,57556,223117	SEMA3B,SEMA7A,SEMA6A,SEMA3D
13_Member	GO Biological Processes	GO:0045665	negative regulation of neuron differentiation	-2.22571	-0.705329	11/222	351,3199,7869,8482,9423,10220,23108,53335,57556,157285,223117	APP,HOXA2,SEMA3B,SEMA7A,NTN1,GDF11,RAP1GAP2,BCL11A,SEMA6A,PRAG1,SEMA3D
13_Member	GO Biological Processes	GO:0120035	regulation of plasma membrane bounded cell projection organization	-2.21061	-0.693761	25/713	816,1627,3082,4070,4131,5649,5792,5880,5909,6423,6857,7869,8482,9423,10324,22873,23108,27063,51364,53335,54825,57556,91752,157285,223117	CAMK2B,DBN1,HGF,TACSTD2,MAP1B,RELN,PTPRF,RAC2,RAP1GAP,SFRP2,SYT1,SEMA3B,SEMA7A,NTN1,KLHL41,DZIP1,RAP1GAP2,ANKRD1,ZMYND10,BCL11A,CDHR2,SEMA6A,ZNF804A,PRAG1,SEMA3D
13_Member	GO Biological Processes	GO:0071526	semaphorin-plexin signaling pathway	-2.14316	-0.649415	4/38	7869,8482,57556,223117	SEMA3B,SEMA7A,SEMA6A,SEMA3D
13_Member	GO Biological Processes	GO:0031344	regulation of cell projection organization	-2.13746	-0.649415	25/723	816,1627,3082,4070,4131,5649,5792,5880,5909,6423,6857,7869,8482,9423,10324,22873,23108,27063,51364,53335,54825,57556,91752,157285,223117	CAMK2B,DBN1,HGF,TACSTD2,MAP1B,RELN,PTPRF,RAC2,RAP1GAP,SFRP2,SYT1,SEMA3B,SEMA7A,NTN1,KLHL41,DZIP1,RAP1GAP2,ANKRD1,ZMYND10,BCL11A,CDHR2,SEMA6A,ZNF804A,PRAG1,SEMA3D
13_Member	GO Biological Processes	GO:0061387	regulation of extent of cell growth	-2.11963	-0.635828	7/111	1627,4131,7869,8482,9423,57556,223117	DBN1,MAP1B,SEMA3B,SEMA7A,NTN1,SEMA6A,SEMA3D
13_Member	GO Biological Processes	GO:0048812	neuron projection morphogenesis	-2.06064	-0.598819	23/658	288,351,816,1009,1627,2736,2817,3199,4131,5293,5649,5880,5909,6857,7869,8399,8482,9423,23767,53335,57556,84623,223117	ANK3,APP,CAMK2B,CDH11,DBN1,GLI2,GPC1,HOXA2,MAP1B,PIK3CD,RELN,RAC2,RAP1GAP,SYT1,SEMA3B,PLA2G10,SEMA7A,NTN1,FLRT3,BCL11A,SEMA6A,KIRREL3,SEMA3D
13_Member	GO Biological Processes	GO:0050922	negative regulation of chemotaxis	-2.01439	-0.568933	5/64	4856,7869,8482,57556,223117	CCN3,SEMA3B,SEMA7A,SEMA6A,SEMA3D
14_Summary	GO Biological Processes	GO:0006820	anion transport	-5.10535	-2.43702	31/637	186,760,2563,3553,4843,6511,6521,6540,6553,6556,6569,6857,8140,8399,8604,8647,9022,9122,9429,10166,10316,10497,23315,23507,26154,28231,57419,63910,84230,123096,219855,2661,2693,3624,8029,51083,887	AGTR2,CA2,GABRD,IL1B,NOS2,SLC1A6,SLC4A1,SLC6A13,SLC9A5,SLC11A1,SLC34A1,SYT1,SLC7A5,PLA2G10,SLC25A12,ABCB11,CLIC3,SLC16A4,ABCG2,SLC25A15,NMUR1,UNC13B,SLC9A8,LRRC8B,ABCA12,SLCO4A1,SLC24A3,SLC17A9,LRRC8C,SLC25A29,SLC37A2,GDF9,GHSR,INHBA,CUBN,GAL,CCKBR
14_Member	GO Biological Processes	GO:0006820	anion transport	-5.10535	-2.43702	31/637	186,760,2563,3553,4843,6511,6521,6540,6553,6556,6569,6857,8140,8399,8604,8647,9022,9122,9429,10166,10316,10497,23315,23507,26154,28231,57419,63910,84230,123096,219855	AGTR2,CA2,GABRD,IL1B,NOS2,SLC1A6,SLC4A1,SLC6A13,SLC9A5,SLC11A1,SLC34A1,SYT1,SLC7A5,PLA2G10,SLC25A12,ABCB11,CLIC3,SLC16A4,ABCG2,SLC25A15,NMUR1,UNC13B,SLC9A8,LRRC8B,ABCA12,SLCO4A1,SLC24A3,SLC17A9,LRRC8C,SLC25A29,SLC37A2
14_Member	GO Biological Processes	GO:0015893	drug transport	-3.96603	-1.73935	14/210	760,2661,2693,3624,6511,6556,6857,8029,8140,8604,9429,10166,51083,123096	CA2,GDF9,GHSR,INHBA,SLC1A6,SLC11A1,SYT1,CUBN,SLC7A5,SLC25A12,ABCG2,SLC25A15,GAL,SLC25A29
14_Member	GO Biological Processes	GO:0015711	organic anion transport	-3.3452	-1.39198	22/487	186,760,3553,4843,6511,6521,6540,6556,6857,8140,8399,8604,8647,9122,9429,10166,10497,26154,28231,84230,123096,219855	AGTR2,CA2,IL1B,NOS2,SLC1A6,SLC4A1,SLC6A13,SLC11A1,SYT1,SLC7A5,PLA2G10,SLC25A12,ABCB11,SLC16A4,ABCG2,SLC25A15,UNC13B,ABCA12,SLCO4A1,LRRC8C,SLC25A29,SLC37A2
14_Member	GO Biological Processes	GO:0015849	organic acid transport	-3.27504	-1.35217	17/334	186,3553,4843,6511,6540,6556,6857,8140,8399,8604,8647,9122,9429,10166,10497,84230,123096	AGTR2,IL1B,NOS2,SLC1A6,SLC6A13,SLC11A1,SYT1,SLC7A5,PLA2G10,SLC25A12,ABCB11,SLC16A4,ABCG2,SLC25A15,UNC13B,LRRC8C,SLC25A29
14_Member	GO Biological Processes	GO:0046942	carboxylic acid transport	-3.27504	-1.35217	17/334	186,3553,4843,6511,6540,6556,6857,8140,8399,8604,8647,9122,9429,10166,10497,84230,123096	AGTR2,IL1B,NOS2,SLC1A6,SLC6A13,SLC11A1,SYT1,SLC7A5,PLA2G10,SLC25A12,ABCB11,SLC16A4,ABCG2,SLC25A15,UNC13B,LRRC8C,SLC25A29
14_Member	GO Biological Processes	GO:0015810	aspartate transmembrane transport	-3.1946	-1.29898	3/9	6511,8604,84230	SLC1A6,SLC25A12,LRRC8C
14_Member	GO Biological Processes	GO:0046717	acid secretion	-2.93171	-1.15186	9/127	186,887,3553,4843,6511,6857,8399,8647,10497	AGTR2,CCKBR,IL1B,NOS2,SLC1A6,SYT1,PLA2G10,ABCB11,UNC13B
14_Member	GO Biological Processes	GO:0006865	amino acid transport	-2.92754	-1.14934	10/153	6511,6540,6556,6857,8140,8604,10166,10497,84230,123096	SLC1A6,SLC6A13,SLC11A1,SYT1,SLC7A5,SLC25A12,SLC25A15,UNC13B,LRRC8C,SLC25A29
14_Member	GO Biological Processes	GO:0015807	L-amino acid transport	-2.58915	-0.949681	6/68	6511,6556,8140,8604,10166,123096	SLC1A6,SLC11A1,SLC7A5,SLC25A12,SLC25A15,SLC25A29
14_Member	GO Biological Processes	GO:1902475	L-alpha-amino acid transmembrane transport	-2.32515	-0.770759	5/54	6511,8140,8604,10166,123096	SLC1A6,SLC7A5,SLC25A12,SLC25A15,SLC25A29
14_Member	GO Biological Processes	GO:0003333	amino acid transmembrane transport	-2.08819	-0.614287	6/86	6511,8140,8604,10166,84230,123096	SLC1A6,SLC7A5,SLC25A12,SLC25A15,LRRC8C,SLC25A29
14_Member	GO Biological Processes	GO:0015740	C4-dicarboxylate transport	-2.07362	-0.608751	3/21	6511,8604,84230	SLC1A6,SLC25A12,LRRC8C
15_Summary	GO Biological Processes	GO:0072521	purine-containing compound metabolic process	-5.00568	-2.36217	30/613	108,270,351,2026,3101,4508,4509,4513,4514,4519,4535,4537,4538,4539,4540,4541,4625,4833,4843,4846,5166,5213,5729,6521,8604,9429,51166,53632,55711,80221,7378,216,2745,3795,4835,9249,9572,10873,84750,20,3636,5293,8395,8399,9108,9651,23236,84812,201164,2878,2952,5092,5646,5805,5880,8029,27306,56267	ADCY2,AMPD1,APP,ENO2,HK3,ATP6,ATP8,COX2,COX3,CYTB,ND1,ND3,ND4,ND4L,ND5,ND6,MYH7,NME4,NOS2,NOS3,PDK4,PFKM,PTGDR,SLC4A1,SLC25A12,ABCG2,AADAT,PRKAG3,FAR2,ACSF2,UPP1,ALDH1A1,GLRX,KHK,NQO2,DHRS3,NR1D1,ME3,FUT10,ABCA2,INPPL1,PIK3CD,PIP5K1B,PLA2G10,MTMR7,PLCH2,PLCB1,PLCD4,PLD6,GPX3,GSTT1,PCBD1,PRSS3,PTS,RAC2,CUBN,HPGDS,KYAT3
15_Member	GO Biological Processes	GO:0072521	purine-containing compound metabolic process	-5.00568	-2.36217	30/613	108,270,351,2026,3101,4508,4509,4513,4514,4519,4535,4537,4538,4539,4540,4541,4625,4833,4843,4846,5166,5213,5729,6521,8604,9429,51166,53632,55711,80221	ADCY2,AMPD1,APP,ENO2,HK3,ATP6,ATP8,COX2,COX3,CYTB,ND1,ND3,ND4,ND4L,ND5,ND6,MYH7,NME4,NOS2,NOS3,PDK4,PFKM,PTGDR,SLC4A1,SLC25A12,ABCG2,AADAT,PRKAG3,FAR2,ACSF2
15_Member	GO Biological Processes	GO:0009161	ribonucleoside monophosphate metabolic process	-4.83362	-2.25706	21/356	270,351,2026,3101,4508,4509,4513,4514,4519,4535,4537,4538,4539,4540,4541,4625,5213,6521,7378,8604,53632	AMPD1,APP,ENO2,HK3,ATP6,ATP8,COX2,COX3,CYTB,ND1,ND3,ND4,ND4L,ND5,ND6,MYH7,PFKM,SLC4A1,UPP1,SLC25A12,PRKAG3
15_Member	GO Biological Processes	GO:0046034	ATP metabolic process	-4.73538	-2.23454	19/306	351,2026,3101,4508,4509,4513,4514,4519,4535,4537,4538,4539,4540,4541,4625,5213,6521,8604,53632	APP,ENO2,HK3,ATP6,ATP8,COX2,COX3,CYTB,ND1,ND3,ND4,ND4L,ND5,ND6,MYH7,PFKM,SLC4A1,SLC25A12,PRKAG3
15_Member	GO Biological Processes	GO:0009205	purine ribonucleoside triphosphate metabolic process	-4.70638	-2.22257	20/335	351,2026,3101,4508,4509,4513,4514,4519,4535,4537,4538,4539,4540,4541,4625,4833,5213,6521,8604,53632	APP,ENO2,HK3,ATP6,ATP8,COX2,COX3,CYTB,ND1,ND3,ND4,ND4L,ND5,ND6,MYH7,NME4,PFKM,SLC4A1,SLC25A12,PRKAG3
15_Member	GO Biological Processes	GO:0006163	purine nucleotide metabolic process	-4.64414	-2.17672	28/577	108,270,351,2026,3101,4508,4509,4513,4514,4519,4535,4537,4538,4539,4540,4541,4625,4833,4843,4846,5166,5213,6521,8604,51166,53632,55711,80221	ADCY2,AMPD1,APP,ENO2,HK3,ATP6,ATP8,COX2,COX3,CYTB,ND1,ND3,ND4,ND4L,ND5,ND6,MYH7,NME4,NOS2,NOS3,PDK4,PFKM,SLC4A1,SLC25A12,AADAT,PRKAG3,FAR2,ACSF2
15_Member	GO Biological Processes	GO:0009199	ribonucleoside triphosphate metabolic process	-4.59625	-2.15232	20/341	351,2026,3101,4508,4509,4513,4514,4519,4535,4537,4538,4539,4540,4541,4625,4833,5213,6521,8604,53632	APP,ENO2,HK3,ATP6,ATP8,COX2,COX3,CYTB,ND1,ND3,ND4,ND4L,ND5,ND6,MYH7,NME4,PFKM,SLC4A1,SLC25A12,PRKAG3
15_Member	GO Biological Processes	GO:0009144	purine nucleoside triphosphate metabolic process	-4.57818	-2.14922	20/342	351,2026,3101,4508,4509,4513,4514,4519,4535,4537,4538,4539,4540,4541,4625,4833,5213,6521,8604,53632	APP,ENO2,HK3,ATP6,ATP8,COX2,COX3,CYTB,ND1,ND3,ND4,ND4L,ND5,ND6,MYH7,NME4,PFKM,SLC4A1,SLC25A12,PRKAG3
15_Member	GO Biological Processes	GO:0009167	purine ribonucleoside monophosphate metabolic process	-4.57818	-2.14922	20/342	270,351,2026,3101,4508,4509,4513,4514,4519,4535,4537,4538,4539,4540,4541,4625,5213,6521,8604,53632	AMPD1,APP,ENO2,HK3,ATP6,ATP8,COX2,COX3,CYTB,ND1,ND3,ND4,ND4L,ND5,ND6,MYH7,PFKM,SLC4A1,SLC25A12,PRKAG3
15_Member	GO Biological Processes	GO:0009126	purine nucleoside monophosphate metabolic process	-4.56018	-2.13852	20/343	270,351,2026,3101,4508,4509,4513,4514,4519,4535,4537,4538,4539,4540,4541,4625,5213,6521,8604,53632	AMPD1,APP,ENO2,HK3,ATP6,ATP8,COX2,COX3,CYTB,ND1,ND3,ND4,ND4L,ND5,ND6,MYH7,PFKM,SLC4A1,SLC25A12,PRKAG3
15_Member	GO Biological Processes	GO:0006091	generation of precursor metabolites and energy	-4.54287	-2.12839	26/522	216,351,2026,2745,3101,3795,4508,4509,4513,4514,4519,4535,4537,4538,4539,4540,4541,4835,4843,5213,6521,8604,9249,9572,10873,53632	ALDH1A1,APP,ENO2,GLRX,HK3,KHK,ATP6,ATP8,COX2,COX3,CYTB,ND1,ND3,ND4,ND4L,ND5,ND6,NQO2,NOS2,PFKM,SLC4A1,SLC25A12,DHRS3,NR1D1,ME3,PRKAG3
15_Member	GO Biological Processes	GO:0009259	ribonucleotide metabolic process	-4.47723	-2.0836	27/558	108,270,351,2026,3101,4508,4509,4513,4514,4519,4535,4537,4538,4539,4540,4541,4625,4833,5166,5213,6521,7378,8604,51166,53632,55711,80221	ADCY2,AMPD1,APP,ENO2,HK3,ATP6,ATP8,COX2,COX3,CYTB,ND1,ND3,ND4,ND4L,ND5,ND6,MYH7,NME4,PDK4,PFKM,SLC4A1,UPP1,SLC25A12,AADAT,PRKAG3,FAR2,ACSF2
15_Member	GO Biological Processes	GO:0009123	nucleoside monophosphate metabolic process	-4.46629	-2.07939	21/377	270,351,2026,3101,4508,4509,4513,4514,4519,4535,4537,4538,4539,4540,4541,4625,5213,6521,7378,8604,53632	AMPD1,APP,ENO2,HK3,ATP6,ATP8,COX2,COX3,CYTB,ND1,ND3,ND4,ND4L,ND5,ND6,MYH7,PFKM,SLC4A1,UPP1,SLC25A12,PRKAG3
15_Member	GO Biological Processes	GO:0009150	purine ribonucleotide metabolic process	-4.25755	-1.94984	26/543	108,270,351,2026,3101,4508,4509,4513,4514,4519,4535,4537,4538,4539,4540,4541,4625,4833,5166,5213,6521,8604,51166,53632,55711,80221	ADCY2,AMPD1,APP,ENO2,HK3,ATP6,ATP8,COX2,COX3,CYTB,ND1,ND3,ND4,ND4L,ND5,ND6,MYH7,NME4,PDK4,PFKM,SLC4A1,SLC25A12,AADAT,PRKAG3,FAR2,ACSF2
15_Member	GO Biological Processes	GO:0009141	nucleoside triphosphate metabolic process	-4.2325	-1.93823	20/362	351,2026,3101,4508,4509,4513,4514,4519,4535,4537,4538,4539,4540,4541,4625,4833,5213,6521,8604,53632	APP,ENO2,HK3,ATP6,ATP8,COX2,COX3,CYTB,ND1,ND3,ND4,ND4L,ND5,ND6,MYH7,NME4,PFKM,SLC4A1,SLC25A12,PRKAG3
15_Member	GO Biological Processes	GO:0019693	ribose phosphate metabolic process	-4.21734	-1.93135	27/578	108,270,351,2026,3101,4508,4509,4513,4514,4519,4535,4537,4538,4539,4540,4541,4625,4833,5166,5213,6521,7378,8604,51166,53632,55711,80221	ADCY2,AMPD1,APP,ENO2,HK3,ATP6,ATP8,COX2,COX3,CYTB,ND1,ND3,ND4,ND4L,ND5,ND6,MYH7,NME4,PDK4,PFKM,SLC4A1,UPP1,SLC25A12,AADAT,PRKAG3,FAR2,ACSF2
15_Member	GO Biological Processes	GO:0019320	hexose catabolic process	-3.82285	-1.65646	7/57	216,2026,3101,3795,5213,8604,84750	ALDH1A1,ENO2,HK3,KHK,PFKM,SLC25A12,FUT10
15_Member	GO Biological Processes	GO:0009117	nucleotide metabolic process	-3.48642	-1.46559	29/710	108,270,351,2026,3101,4508,4509,4513,4514,4519,4535,4537,4538,4539,4540,4541,4625,4833,4843,4846,5166,5213,6521,7378,8604,51166,53632,55711,80221	ADCY2,AMPD1,APP,ENO2,HK3,ATP6,ATP8,COX2,COX3,CYTB,ND1,ND3,ND4,ND4L,ND5,ND6,MYH7,NME4,NOS2,NOS3,PDK4,PFKM,SLC4A1,UPP1,SLC25A12,AADAT,PRKAG3,FAR2,ACSF2
15_Member	GO Biological Processes	GO:0006753	nucleoside phosphate metabolic process	-3.41733	-1.43896	29/717	108,270,351,2026,3101,4508,4509,4513,4514,4519,4535,4537,4538,4539,4540,4541,4625,4833,4843,4846,5166,5213,6521,7378,8604,51166,53632,55711,80221	ADCY2,AMPD1,APP,ENO2,HK3,ATP6,ATP8,COX2,COX3,CYTB,ND1,ND3,ND4,ND4L,ND5,ND6,MYH7,NME4,NOS2,NOS3,PDK4,PFKM,SLC4A1,UPP1,SLC25A12,AADAT,PRKAG3,FAR2,ACSF2
15_Member	GO Biological Processes	GO:0046365	monosaccharide catabolic process	-3.38139	-1.41458	7/67	216,2026,3101,3795,5213,8604,84750	ALDH1A1,ENO2,HK3,KHK,PFKM,SLC25A12,FUT10
15_Member	GO Biological Processes	GO:0006164	purine nucleotide biosynthetic process	-3.33395	-1.38456	16/300	108,270,351,2026,3101,4508,4509,4513,4833,4843,4846,5166,5213,6521,8604,53632	ADCY2,AMPD1,APP,ENO2,HK3,ATP6,ATP8,COX2,NME4,NOS2,NOS3,PDK4,PFKM,SLC4A1,SLC25A12,PRKAG3
15_Member	GO Biological Processes	GO:0072522	purine-containing compound biosynthetic process	-3.13561	-1.26008	16/313	108,270,351,2026,3101,4508,4509,4513,4833,4843,4846,5166,5213,6521,8604,53632	ADCY2,AMPD1,APP,ENO2,HK3,ATP6,ATP8,COX2,NME4,NOS2,NOS3,PDK4,PFKM,SLC4A1,SLC25A12,PRKAG3
15_Member	GO Biological Processes	GO:0009156	ribonucleoside monophosphate biosynthetic process	-3.13049	-1.25986	12/197	270,351,2026,3101,4508,4509,4513,5213,6521,7378,8604,53632	AMPD1,APP,ENO2,HK3,ATP6,ATP8,COX2,PFKM,SLC4A1,UPP1,SLC25A12,PRKAG3
15_Member	GO Biological Processes	GO:0009206	purine ribonucleoside triphosphate biosynthetic process	-3.10864	-1.25322	11/171	351,2026,3101,4508,4509,4513,4833,5213,6521,8604,53632	APP,ENO2,HK3,ATP6,ATP8,COX2,NME4,PFKM,SLC4A1,SLC25A12,PRKAG3
15_Member	GO Biological Processes	GO:0009145	purine nucleoside triphosphate biosynthetic process	-3.08776	-1.23626	11/172	351,2026,3101,4508,4509,4513,4833,5213,6521,8604,53632	APP,ENO2,HK3,ATP6,ATP8,COX2,NME4,PFKM,SLC4A1,SLC25A12,PRKAG3
15_Member	GO Biological Processes	GO:0009260	ribonucleotide biosynthetic process	-2.99605	-1.18242	15/292	108,270,351,2026,3101,4508,4509,4513,4833,5166,5213,6521,7378,8604,53632	ADCY2,AMPD1,APP,ENO2,HK3,ATP6,ATP8,COX2,NME4,PDK4,PFKM,SLC4A1,UPP1,SLC25A12,PRKAG3
15_Member	GO Biological Processes	GO:0009201	ribonucleoside triphosphate biosynthetic process	-2.98589	-1.17701	11/177	351,2026,3101,4508,4509,4513,4833,5213,6521,8604,53632	APP,ENO2,HK3,ATP6,ATP8,COX2,NME4,PFKM,SLC4A1,SLC25A12,PRKAG3
15_Member	GO Biological Processes	GO:0009124	nucleoside monophosphate biosynthetic process	-2.92582	-1.14926	12/208	270,351,2026,3101,4508,4509,4513,5213,6521,7378,8604,53632	AMPD1,APP,ENO2,HK3,ATP6,ATP8,COX2,PFKM,SLC4A1,UPP1,SLC25A12,PRKAG3
15_Member	GO Biological Processes	GO:0090407	organophosphate biosynthetic process	-2.916	-1.14289	27/700	20,108,270,351,2026,3101,3636,4508,4509,4513,4833,4843,4846,5166,5213,5293,6521,7378,8395,8399,8604,9108,9651,23236,53632,84812,201164	ABCA2,ADCY2,AMPD1,APP,ENO2,HK3,INPPL1,ATP6,ATP8,COX2,NME4,NOS2,NOS3,PDK4,PFKM,PIK3CD,SLC4A1,UPP1,PIP5K1B,PLA2G10,SLC25A12,MTMR7,PLCH2,PLCB1,PRKAG3,PLCD4,PLD6
15_Member	GO Biological Processes	GO:0046390	ribose phosphate biosynthetic process	-2.89362	-1.13139	15/299	108,270,351,2026,3101,4508,4509,4513,4833,5166,5213,6521,7378,8604,53632	ADCY2,AMPD1,APP,ENO2,HK3,ATP6,ATP8,COX2,NME4,PDK4,PFKM,SLC4A1,UPP1,SLC25A12,PRKAG3
15_Member	GO Biological Processes	GO:0009127	purine nucleoside monophosphate biosynthetic process	-2.8689	-1.12394	11/183	270,351,2026,3101,4508,4509,4513,5213,6521,8604,53632	AMPD1,APP,ENO2,HK3,ATP6,ATP8,COX2,PFKM,SLC4A1,SLC25A12,PRKAG3
15_Member	GO Biological Processes	GO:0009168	purine ribonucleoside monophosphate biosynthetic process	-2.8689	-1.12394	11/183	270,351,2026,3101,4508,4509,4513,5213,6521,8604,53632	AMPD1,APP,ENO2,HK3,ATP6,ATP8,COX2,PFKM,SLC4A1,SLC25A12,PRKAG3
15_Member	GO Biological Processes	GO:0006754	ATP biosynthetic process	-2.78172	-1.06905	10/160	351,2026,3101,4508,4509,4513,5213,6521,8604,53632	APP,ENO2,HK3,ATP6,ATP8,COX2,PFKM,SLC4A1,SLC25A12,PRKAG3
15_Member	GO Biological Processes	GO:0009142	nucleoside triphosphate biosynthetic process	-2.77555	-1.0671	11/188	351,2026,3101,4508,4509,4513,4833,5213,6521,8604,53632	APP,ENO2,HK3,ATP6,ATP8,COX2,NME4,PFKM,SLC4A1,SLC25A12,PRKAG3
15_Member	GO Biological Processes	GO:0009152	purine ribonucleotide biosynthetic process	-2.73844	-1.03904	14/279	108,270,351,2026,3101,4508,4509,4513,4833,5166,5213,6521,8604,53632	ADCY2,AMPD1,APP,ENO2,HK3,ATP6,ATP8,COX2,NME4,PDK4,PFKM,SLC4A1,SLC25A12,PRKAG3
15_Member	GO Biological Processes	GO:0009165	nucleotide biosynthetic process	-2.60958	-0.950389	17/385	108,270,351,2026,3101,4508,4509,4513,4833,4843,4846,5166,5213,6521,7378,8604,53632	ADCY2,AMPD1,APP,ENO2,HK3,ATP6,ATP8,COX2,NME4,NOS2,NOS3,PDK4,PFKM,SLC4A1,UPP1,SLC25A12,PRKAG3
15_Member	GO Biological Processes	GO:0061615	glycolytic process through fructose-6-phosphate	-2.57337	-0.942932	4/29	2026,3101,5213,6521	ENO2,HK3,PFKM,SLC4A1
15_Member	GO Biological Processes	GO:1901293	nucleoside phosphate biosynthetic process	-2.56355	-0.937774	17/389	108,270,351,2026,3101,4508,4509,4513,4833,4843,4846,5166,5213,6521,7378,8604,53632	ADCY2,AMPD1,APP,ENO2,HK3,ATP6,ATP8,COX2,NME4,NOS2,NOS3,PDK4,PFKM,SLC4A1,UPP1,SLC25A12,PRKAG3
15_Member	GO Biological Processes	GO:0006090	pyruvate metabolic process	-2.34463	-0.780541	9/155	351,2026,3101,5166,5213,6521,8604,10873,53632	APP,ENO2,HK3,PDK4,PFKM,SLC4A1,SLC25A12,ME3,PRKAG3
15_Member	GO Biological Processes	GO:0006007	glucose catabolic process	-2.22736	-0.706066	4/36	2026,3101,5213,8604	ENO2,HK3,PFKM,SLC25A12
15_Member	GO Biological Processes	GO:0051186	cofactor metabolic process	-2.1502	-0.652816	22/609	351,2026,2878,2952,3101,4513,4846,5092,5166,5213,5646,5805,5880,6521,8029,8604,27306,51166,53632,55711,56267,80221	APP,ENO2,GPX3,GSTT1,HK3,COX2,NOS3,PCBD1,PDK4,PFKM,PRSS3,PTS,RAC2,SLC4A1,CUBN,SLC25A12,HPGDS,AADAT,PRKAG3,FAR2,KYAT3,ACSF2
15_Member	GO Biological Processes	GO:0016052	carbohydrate catabolic process	-2.096	-0.619647	10/200	216,351,2026,3101,3795,5213,6521,8604,53632,84750	ALDH1A1,APP,ENO2,HK3,KHK,PFKM,SLC4A1,SLC25A12,PRKAG3,FUT10
16_Summary	GO Biological Processes	GO:0001503	ossification	-4.91821	-2.32046	23/408	652,1009,1280,2254,2735,2736,2822,3082,3199,3636,5251,6423,6569,7010,8482,8840,9249,10272,25884,115908,117581,148979,338773	BMP4,CDH11,COL2A1,FGF9,GLI1,GLI2,GPLD1,HGF,HOXA2,INPPL1,PHEX,SFRP2,SLC34A1,TEK,SEMA7A,CCN4,DHRS3,FSTL3,CHRDL2,CTHRC1,TWIST2,GLIS1,TMEM119
16_Member	GO Biological Processes	GO:0001503	ossification	-4.91821	-2.32046	23/408	652,1009,1280,2254,2735,2736,2822,3082,3199,3636,5251,6423,6569,7010,8482,8840,9249,10272,25884,115908,117581,148979,338773	BMP4,CDH11,COL2A1,FGF9,GLI1,GLI2,GPLD1,HGF,HOXA2,INPPL1,PHEX,SFRP2,SLC34A1,TEK,SEMA7A,CCN4,DHRS3,FSTL3,CHRDL2,CTHRC1,TWIST2,GLIS1,TMEM119
16_Member	GO Biological Processes	GO:0001649	osteoblast differentiation	-3.04154	-1.21464	13/230	652,2254,2735,2736,3082,3199,6423,8482,8840,115908,117581,148979,338773	BMP4,FGF9,GLI1,GLI2,HGF,HOXA2,SFRP2,SEMA7A,CCN4,CTHRC1,TWIST2,GLIS1,TMEM119
16_Member	GO Biological Processes	GO:0045667	regulation of osteoblast differentiation	-2.88404	-1.13139	9/129	652,2735,3082,3199,6423,8840,115908,117581,338773	BMP4,GLI1,HGF,HOXA2,SFRP2,CCN4,CTHRC1,TWIST2,TMEM119
16_Member	GO Biological Processes	GO:0045669	positive regulation of osteoblast differentiation	-2.65528	-0.98567	6/66	652,3082,6423,8840,115908,338773	BMP4,HGF,SFRP2,CCN4,CTHRC1,TMEM119
17_Summary	GO Biological Processes	GO:0042476	odontogenesis	-4.77877	-2.24963	12/132	652,760,947,2736,3624,4982,5251,5308,6569,7475,10468,431707	BMP4,CA2,CD34,GLI2,INHBA,TNFRSF11B,PHEX,PITX2,SLC34A1,WNT6,FST,LHX8
17_Member	GO Biological Processes	GO:0042476	odontogenesis	-4.77877	-2.24963	12/132	652,760,947,2736,3624,4982,5251,5308,6569,7475,10468,431707	BMP4,CA2,CD34,GLI2,INHBA,TNFRSF11B,PHEX,PITX2,SLC34A1,WNT6,FST,LHX8
17_Member	GO Biological Processes	GO:0042475	odontogenesis of dentin-containing tooth	-3.27323	-1.35217	8/91	652,760,2736,4982,6569,7475,10468,431707	BMP4,CA2,GLI2,TNFRSF11B,SLC34A1,WNT6,FST,LHX8
17_Member	GO Biological Processes	GO:0042481	regulation of odontogenesis	-2.69088	-1.01145	4/27	652,947,4982,7475	BMP4,CD34,TNFRSF11B,WNT6
18_Summary	GO Biological Processes	GO:0006816	calcium ion transport	-4.77323	-2.24963	24/446	309,489,779,816,825,845,2641,3603,4846,6263,9254,9651,9992,10203,10316,10369,23236,56704,57113,57419,84812,117531,246329,283229,6556,186,288,351,760,887,2740,5166,5729,6337,6521,6553,6569,9429,23315,23400,51554	ANXA6,ATP2A3,CACNA1S,CAMK2B,CAPN3,CASQ2,GCG,IL16,NOS3,RYR3,CACNA2D2,PLCH2,KCNE2,CALCRL,NMUR1,CACNG2,PLCB1,JPH1,TRPC7,SLC24A3,PLCD4,TMC1,STAC3,CRACR2B,SLC11A1,AGTR2,ANK3,APP,CA2,CCKBR,GLP1R,PDK4,PTGDR,SCNN1A,SLC4A1,SLC9A5,SLC34A1,ABCG2,SLC9A8,ATP13A2,ACKR4
18_Member	GO Biological Processes	GO:0006816	calcium ion transport	-4.77323	-2.24963	24/446	309,489,779,816,825,845,2641,3603,4846,6263,9254,9651,9992,10203,10316,10369,23236,56704,57113,57419,84812,117531,246329,283229	ANXA6,ATP2A3,CACNA1S,CAMK2B,CAPN3,CASQ2,GCG,IL16,NOS3,RYR3,CACNA2D2,PLCH2,KCNE2,CALCRL,NMUR1,CACNG2,PLCB1,JPH1,TRPC7,SLC24A3,PLCD4,TMC1,STAC3,CRACR2B
18_Member	GO Biological Processes	GO:0070838	divalent metal ion transport	-4.4887	-2.08823	25/495	309,489,779,816,825,845,2641,3603,4846,6263,6556,9254,9651,9992,10203,10316,10369,23236,56704,57113,57419,84812,117531,246329,283229	ANXA6,ATP2A3,CACNA1S,CAMK2B,CAPN3,CASQ2,GCG,IL16,NOS3,RYR3,SLC11A1,CACNA2D2,PLCH2,KCNE2,CALCRL,NMUR1,CACNG2,PLCB1,JPH1,TRPC7,SLC24A3,PLCD4,TMC1,STAC3,CRACR2B
18_Member	GO Biological Processes	GO:0072511	divalent inorganic cation transport	-4.40341	-2.03426	25/501	309,489,779,816,825,845,2641,3603,4846,6263,6556,9254,9651,9992,10203,10316,10369,23236,56704,57113,57419,84812,117531,246329,283229	ANXA6,ATP2A3,CACNA1S,CAMK2B,CAPN3,CASQ2,GCG,IL16,NOS3,RYR3,SLC11A1,CACNA2D2,PLCH2,KCNE2,CALCRL,NMUR1,CACNG2,PLCB1,JPH1,TRPC7,SLC24A3,PLCD4,TMC1,STAC3,CRACR2B
18_Member	GO Biological Processes	GO:0070588	calcium ion transmembrane transport	-3.3491	-1.39233	17/329	309,489,779,825,845,6263,9254,9651,9992,10369,23236,56704,57113,57419,84812,117531,246329	ANXA6,ATP2A3,CACNA1S,CAPN3,CASQ2,RYR3,CACNA2D2,PLCH2,KCNE2,CACNG2,PLCB1,JPH1,TRPC7,SLC24A3,PLCD4,TMC1,STAC3
18_Member	GO Biological Processes	GO:0098771	inorganic ion homeostasis	-2.72028	-1.02967	28/759	186,288,309,351,489,760,825,845,887,2740,5166,5729,6263,6337,6521,6553,6556,6569,9429,9651,23236,23315,23400,51554,56704,57113,57419,84812	AGTR2,ANK3,ANXA6,APP,ATP2A3,CA2,CAPN3,CASQ2,CCKBR,GLP1R,PDK4,PTGDR,RYR3,SCNN1A,SLC4A1,SLC9A5,SLC11A1,SLC34A1,ABCG2,PLCH2,PLCB1,SLC9A8,ATP13A2,ACKR4,JPH1,TRPC7,SLC24A3,PLCD4
18_Member	GO Biological Processes	GO:0055080	cation homeostasis	-2.51313	-0.904389	27/748	186,288,309,351,489,760,825,845,887,2740,5166,5729,6263,6337,6521,6553,6556,9429,9651,23236,23315,23400,51554,56704,57113,57419,84812	AGTR2,ANK3,ANXA6,APP,ATP2A3,CA2,CAPN3,CASQ2,CCKBR,GLP1R,PDK4,PTGDR,RYR3,SCNN1A,SLC4A1,SLC9A5,SLC11A1,ABCG2,PLCH2,PLCB1,SLC9A8,ATP13A2,ACKR4,JPH1,TRPC7,SLC24A3,PLCD4
18_Member	GO Biological Processes	GO:0006873	cellular ion homeostasis	-2.42716	-0.836649	25/685	186,309,351,489,760,825,845,887,2740,5729,6263,6521,6553,6556,6569,9429,9651,23236,23315,23400,51554,56704,57113,57419,84812	AGTR2,ANXA6,APP,ATP2A3,CA2,CAPN3,CASQ2,CCKBR,GLP1R,PTGDR,RYR3,SLC4A1,SLC9A5,SLC11A1,SLC34A1,ABCG2,PLCH2,PLCB1,SLC9A8,ATP13A2,ACKR4,JPH1,TRPC7,SLC24A3,PLCD4
18_Member	GO Biological Processes	GO:0051283	negative regulation of sequestering of calcium ion	-2.24909	-0.71828	8/132	309,825,845,6263,9651,23236,56704,84812	ANXA6,CAPN3,CASQ2,RYR3,PLCH2,PLCB1,JPH1,PLCD4
18_Member	GO Biological Processes	GO:0030003	cellular cation homeostasis	-2.23783	-0.711043	24/672	186,309,351,489,760,825,845,887,2740,5729,6263,6521,6553,6556,9429,9651,23236,23315,23400,51554,56704,57113,57419,84812	AGTR2,ANXA6,APP,ATP2A3,CA2,CAPN3,CASQ2,CCKBR,GLP1R,PTGDR,RYR3,SLC4A1,SLC9A5,SLC11A1,ABCG2,PLCH2,PLCB1,SLC9A8,ATP13A2,ACKR4,JPH1,TRPC7,SLC24A3,PLCD4
18_Member	GO Biological Processes	GO:0051282	regulation of sequestering of calcium ion	-2.21052	-0.693761	8/134	309,825,845,6263,9651,23236,56704,84812	ANXA6,CAPN3,CASQ2,RYR3,PLCH2,PLCB1,JPH1,PLCD4
18_Member	GO Biological Processes	GO:0051208	sequestering of calcium ion	-2.15418	-0.655937	8/137	309,825,845,6263,9651,23236,56704,84812	ANXA6,CAPN3,CASQ2,RYR3,PLCH2,PLCB1,JPH1,PLCD4
19_Summary	GO Biological Processes	GO:0010817	regulation of hormone levels	-4.7671	-2.24963	27/537	186,216,438,2641,2661,2693,2740,2752,2822,3553,3624,3625,3747,4843,4856,5798,8292,9227,9249,9254,9572,10411,10858,28231,51083,51301,54760,947,1138,2207,5600,5880,6857,7850,8840,9173,10497,23400,27063,84830,201294,376267,288,347,652,760,2040,11142,89866,8399	AGTR2,ALDH1A1,ASMT,GCG,GDF9,GHSR,GLP1R,GLUL,GPLD1,IL1B,INHBA,INHBB,KCNC2,NOS2,CCN3,PTPRN,COLQ,LRAT,DHRS3,CACNA2D2,NR1D1,RAPGEF3,CYP46A1,SLCO4A1,GAL,GCNT4,PCSK4,CD34,CHRNA5,FCER1G,MAPK11,RAC2,SYT1,IL1R2,CCN4,IL1RL1,UNC13B,ATP13A2,ANKRD1,ADTRP,UNC13D,RAB15,ANK3,APOD,BMP4,CA2,STOM,PKIG,SEC16B,PLA2G10
19_Member	GO Biological Processes	GO:0010817	regulation of hormone levels	-4.7671	-2.24963	27/537	186,216,438,2641,2661,2693,2740,2752,2822,3553,3624,3625,3747,4843,4856,5798,8292,9227,9249,9254,9572,10411,10858,28231,51083,51301,54760	AGTR2,ALDH1A1,ASMT,GCG,GDF9,GHSR,GLP1R,GLUL,GPLD1,IL1B,INHBA,INHBB,KCNC2,NOS2,CCN3,PTPRN,COLQ,LRAT,DHRS3,CACNA2D2,NR1D1,RAPGEF3,CYP46A1,SLCO4A1,GAL,GCNT4,PCSK4
19_Member	GO Biological Processes	GO:0030073	insulin secretion	-4.60054	-2.15232	15/208	2641,2693,2740,2752,2822,3553,3625,3747,4843,4856,5798,9254,9572,10411,51083	GCG,GHSR,GLP1R,GLUL,GPLD1,IL1B,INHBB,KCNC2,NOS2,CCN3,PTPRN,CACNA2D2,NR1D1,RAPGEF3,GAL
19_Member	GO Biological Processes	GO:0046883	regulation of hormone secretion	-4.3952	-2.03426	17/269	186,2641,2661,2693,2740,2752,2822,3553,3624,3625,3747,4843,4856,9254,9572,10411,51083	AGTR2,GCG,GDF9,GHSR,GLP1R,GLUL,GPLD1,IL1B,INHBA,INHBB,KCNC2,NOS2,CCN3,CACNA2D2,NR1D1,RAPGEF3,GAL
19_Member	GO Biological Processes	GO:0009914	hormone transport	-4.39518	-2.03426	19/324	186,2641,2661,2693,2740,2752,2822,3553,3624,3625,3747,4843,4856,5798,9254,9572,10411,28231,51083	AGTR2,GCG,GDF9,GHSR,GLP1R,GLUL,GPLD1,IL1B,INHBA,INHBB,KCNC2,NOS2,CCN3,PTPRN,CACNA2D2,NR1D1,RAPGEF3,SLCO4A1,GAL
19_Member	GO Biological Processes	GO:0050796	regulation of insulin secretion	-4.14628	-1.87589	13/177	2641,2693,2740,2752,2822,3553,3625,3747,4843,4856,9254,9572,10411	GCG,GHSR,GLP1R,GLUL,GPLD1,IL1B,INHBB,KCNC2,NOS2,CCN3,CACNA2D2,NR1D1,RAPGEF3
19_Member	GO Biological Processes	GO:0046879	hormone secretion	-4.03423	-1.78866	18/316	186,2641,2661,2693,2740,2752,2822,3553,3624,3625,3747,4843,4856,5798,9254,9572,10411,51083	AGTR2,GCG,GDF9,GHSR,GLP1R,GLUL,GPLD1,IL1B,INHBA,INHBB,KCNC2,NOS2,CCN3,PTPRN,CACNA2D2,NR1D1,RAPGEF3,GAL
19_Member	GO Biological Processes	GO:1903530	regulation of secretion by cell	-3.85439	-1.67901	32/777	186,947,1138,2207,2641,2661,2693,2740,2752,2822,3553,3624,3625,3747,4843,4856,5600,5880,6857,7850,8840,9173,9254,9572,10411,10497,23400,27063,51083,84830,201294,376267	AGTR2,CD34,CHRNA5,FCER1G,GCG,GDF9,GHSR,GLP1R,GLUL,GPLD1,IL1B,INHBA,INHBB,KCNC2,NOS2,CCN3,MAPK11,RAC2,SYT1,IL1R2,CCN4,IL1RL1,CACNA2D2,NR1D1,RAPGEF3,UNC13B,ATP13A2,ANKRD1,GAL,ADTRP,UNC13D,RAB15
19_Member	GO Biological Processes	GO:0090087	regulation of peptide transport	-3.72823	-1.59661	31/755	186,288,347,652,760,947,2040,2641,2693,2740,2752,2822,3553,3625,3747,4843,4856,5600,5880,7850,8840,9173,9254,9572,10411,10497,11142,23400,27063,84830,89866	AGTR2,ANK3,APOD,BMP4,CA2,CD34,STOM,GCG,GHSR,GLP1R,GLUL,GPLD1,IL1B,INHBB,KCNC2,NOS2,CCN3,MAPK11,RAC2,IL1R2,CCN4,IL1RL1,CACNA2D2,NR1D1,RAPGEF3,UNC13B,PKIG,ATP13A2,ANKRD1,ADTRP,SEC16B
19_Member	GO Biological Processes	GO:0051223	regulation of protein transport	-3.68301	-1.56884	30/725	186,288,347,652,947,2040,2641,2693,2740,2752,2822,3553,3625,3747,4843,4856,5600,5880,7850,8840,9173,9254,9572,10411,10497,11142,23400,27063,84830,89866	AGTR2,ANK3,APOD,BMP4,CD34,STOM,GCG,GHSR,GLP1R,GLUL,GPLD1,IL1B,INHBB,KCNC2,NOS2,CCN3,MAPK11,RAC2,IL1R2,CCN4,IL1RL1,CACNA2D2,NR1D1,RAPGEF3,UNC13B,PKIG,ATP13A2,ANKRD1,ADTRP,SEC16B
19_Member	GO Biological Processes	GO:0050708	regulation of protein secretion	-3.68229	-1.56884	23/492	186,947,2641,2693,2740,2752,2822,3553,3625,3747,4843,4856,5600,7850,8840,9173,9254,9572,10411,10497,23400,27063,84830	AGTR2,CD34,GCG,GHSR,GLP1R,GLUL,GPLD1,IL1B,INHBB,KCNC2,NOS2,CCN3,MAPK11,IL1R2,CCN4,IL1RL1,CACNA2D2,NR1D1,RAPGEF3,UNC13B,ATP13A2,ANKRD1,ADTRP
19_Member	GO Biological Processes	GO:0030072	peptide hormone secretion	-3.64404	-1.55818	15/253	2641,2693,2740,2752,2822,3553,3625,3747,4843,4856,5798,9254,9572,10411,51083	GCG,GHSR,GLP1R,GLUL,GPLD1,IL1B,INHBB,KCNC2,NOS2,CCN3,PTPRN,CACNA2D2,NR1D1,RAPGEF3,GAL
19_Member	GO Biological Processes	GO:0090276	regulation of peptide hormone secretion	-3.43135	-1.44171	13/209	2641,2693,2740,2752,2822,3553,3625,3747,4843,4856,9254,9572,10411	GCG,GHSR,GLP1R,GLUL,GPLD1,IL1B,INHBB,KCNC2,NOS2,CCN3,CACNA2D2,NR1D1,RAPGEF3
19_Member	GO Biological Processes	GO:0009306	protein secretion	-3.41605	-1.43896	26/614	186,947,2641,2693,2740,2752,2822,3553,3625,3747,4843,4856,5600,5798,7850,8840,9173,9254,9572,10411,10497,23400,27063,51083,84830,376267	AGTR2,CD34,GCG,GHSR,GLP1R,GLUL,GPLD1,IL1B,INHBB,KCNC2,NOS2,CCN3,MAPK11,PTPRN,IL1R2,CCN4,IL1RL1,CACNA2D2,NR1D1,RAPGEF3,UNC13B,ATP13A2,ANKRD1,GAL,ADTRP,RAB15
19_Member	GO Biological Processes	GO:0002791	regulation of peptide secretion	-3.34381	-1.39198	23/520	186,947,2641,2693,2740,2752,2822,3553,3625,3747,4843,4856,5600,7850,8840,9173,9254,9572,10411,10497,23400,27063,84830	AGTR2,CD34,GCG,GHSR,GLP1R,GLUL,GPLD1,IL1B,INHBB,KCNC2,NOS2,CCN3,MAPK11,IL1R2,CCN4,IL1RL1,CACNA2D2,NR1D1,RAPGEF3,UNC13B,ATP13A2,ANKRD1,ADTRP
19_Member	GO Biological Processes	GO:0070201	regulation of establishment of protein localization	-3.23097	-1.32327	30/772	186,288,347,652,947,2040,2641,2693,2740,2752,2822,3553,3625,3747,4843,4856,5600,5880,7850,8840,9173,9254,9572,10411,10497,11142,23400,27063,84830,89866	AGTR2,ANK3,APOD,BMP4,CD34,STOM,GCG,GHSR,GLP1R,GLUL,GPLD1,IL1B,INHBB,KCNC2,NOS2,CCN3,MAPK11,RAC2,IL1R2,CCN4,IL1RL1,CACNA2D2,NR1D1,RAPGEF3,UNC13B,PKIG,ATP13A2,ANKRD1,ADTRP,SEC16B
19_Member	GO Biological Processes	GO:0023061	signal release	-3.19344	-1.29898	21/467	186,1138,2641,2661,2693,2740,2752,2822,3553,3624,3625,3747,4843,4856,5798,6857,9254,9572,10411,10497,51083	AGTR2,CHRNA5,GCG,GDF9,GHSR,GLP1R,GLUL,GPLD1,IL1B,INHBA,INHBB,KCNC2,NOS2,CCN3,PTPRN,SYT1,CACNA2D2,NR1D1,RAPGEF3,UNC13B,GAL
19_Member	GO Biological Processes	GO:0002790	peptide secretion	-3.06138	-1.21893	26/649	186,947,2641,2693,2740,2752,2822,3553,3625,3747,4843,4856,5600,5798,7850,8840,9173,9254,9572,10411,10497,23400,27063,51083,84830,376267	AGTR2,CD34,GCG,GHSR,GLP1R,GLUL,GPLD1,IL1B,INHBB,KCNC2,NOS2,CCN3,MAPK11,PTPRN,IL1R2,CCN4,IL1RL1,CACNA2D2,NR1D1,RAPGEF3,UNC13B,ATP13A2,ANKRD1,GAL,ADTRP,RAB15
19_Member	GO Biological Processes	GO:0051047	positive regulation of secretion	-2.78643	-1.07158	19/436	186,947,2207,2641,2752,2822,3553,3624,3625,5600,6857,8399,9173,10497,23400,27063,51083,201294,376267	AGTR2,CD34,FCER1G,GCG,GLUL,GPLD1,IL1B,INHBA,INHBB,MAPK11,SYT1,PLA2G10,IL1RL1,UNC13B,ATP13A2,ANKRD1,GAL,UNC13D,RAB15
19_Member	GO Biological Processes	GO:1903532	positive regulation of secretion by cell	-2.74989	-1.04701	18/406	186,947,2207,2641,2752,2822,3553,3624,3625,5600,6857,9173,10497,23400,27063,51083,201294,376267	AGTR2,CD34,FCER1G,GCG,GLUL,GPLD1,IL1B,INHBA,INHBB,MAPK11,SYT1,IL1RL1,UNC13B,ATP13A2,ANKRD1,GAL,UNC13D,RAB15
20_Summary	GO Biological Processes	GO:0060395	SMAD protein signal transduction	-4.6317	-2.17226	9/76	652,2661,3624,3625,3626,4856,6862,10220,84913,186,3553,51083,56937,2254,6423,9719,10272,10468,93649,7122,4846,2693	BMP4,GDF9,INHBA,INHBB,INHBC,CCN3,TBXT,GDF11,ATOH8,AGTR2,IL1B,GAL,PMEPA1,FGF9,SFRP2,ADAMTSL2,FSTL3,FST,MYOCD,CLDN5,NOS3,GHSR
20_Member	GO Biological Processes	GO:0060395	SMAD protein signal transduction	-4.6317	-2.17226	9/76	652,2661,3624,3625,3626,4856,6862,10220,84913	BMP4,GDF9,INHBA,INHBB,INHBC,CCN3,TBXT,GDF11,ATOH8
20_Member	GO Biological Processes	GO:0044060	regulation of endocrine process	-3.60201	-1.52625	6/44	186,2661,3553,3624,3625,51083	AGTR2,GDF9,IL1B,INHBA,INHBB,GAL
20_Member	GO Biological Processes	GO:0060393	regulation of pathway-restricted SMAD protein phosphorylation	-3.59116	-1.52625	7/62	652,2661,3624,3625,3626,10220,56937	BMP4,GDF9,INHBA,INHBB,INHBC,GDF11,PMEPA1
20_Member	GO Biological Processes	GO:0060389	pathway-restricted SMAD protein phosphorylation	-3.4629	-1.45621	7/65	652,2661,3624,3625,3626,10220,56937	BMP4,GDF9,INHBA,INHBB,INHBC,GDF11,PMEPA1
20_Member	GO Biological Processes	GO:0060986	endocrine hormone secretion	-3.44214	-1.44444	6/47	186,2661,3553,3624,3625,51083	AGTR2,GDF9,IL1B,INHBA,INHBB,GAL
20_Member	GO Biological Processes	GO:0010862	positive regulation of pathway-restricted SMAD protein phosphorylation	-3.39158	-1.42222	6/48	652,2661,3624,3625,3626,10220	BMP4,GDF9,INHBA,INHBB,INHBC,GDF11
20_Member	GO Biological Processes	GO:0090092	regulation of transmembrane receptor protein serine/threonine kinase signaling pathway	-3.24444	-1.33243	14/247	652,2254,2661,3624,3625,3626,4856,6423,9719,10220,10272,10468,56937,93649	BMP4,FGF9,GDF9,INHBA,INHBB,INHBC,CCN3,SFRP2,ADAMTSL2,GDF11,FSTL3,FST,PMEPA1,MYOCD
20_Member	GO Biological Processes	GO:0035929	steroid hormone secretion	-3.1163	-1.25495	4/21	186,2661,3624,51083	AGTR2,GDF9,INHBA,GAL
20_Member	GO Biological Processes	GO:0007178	transmembrane receptor protein serine/threonine kinase signaling pathway	-2.96894	-1.16533	17/356	652,2254,2661,3624,3625,3626,4856,6423,6862,7122,9719,10220,10272,10468,56937,84913,93649	BMP4,FGF9,GDF9,INHBA,INHBB,INHBC,CCN3,SFRP2,TBXT,CLDN5,ADAMTSL2,GDF11,FSTL3,FST,PMEPA1,ATOH8,MYOCD
20_Member	GO Biological Processes	GO:0050886	endocrine process	-2.79275	-1.07438	7/84	186,2661,3553,3624,3625,4846,51083	AGTR2,GDF9,IL1B,INHBA,INHBB,NOS3,GAL
20_Member	GO Biological Processes	GO:0090100	positive regulation of transmembrane receptor protein serine/threonine kinase signaling pathway	-2.78567	-1.07158	8/108	652,2254,2661,3624,3625,3626,10220,93649	BMP4,FGF9,GDF9,INHBA,INHBB,INHBC,GDF11,MYOCD
20_Member	GO Biological Processes	GO:0032924	activin receptor signaling pathway	-2.67357	-1.00009	5/45	2254,3624,3625,10272,10468	FGF9,INHBA,INHBB,FSTL3,FST
20_Member	GO Biological Processes	GO:2000831	regulation of steroid hormone secretion	-2.26623	-0.732936	3/18	186,2661,51083	AGTR2,GDF9,GAL
20_Member	GO Biological Processes	GO:0030728	ovulation	-2.07362	-0.608751	3/21	3624,3625,4846	INHBA,INHBB,NOS3
20_Member	GO Biological Processes	GO:0046888	negative regulation of hormone secretion	-2.01439	-0.568933	5/64	2693,3553,3624,3625,4856	GHSR,IL1B,INHBA,INHBB,CCN3
