# Supplementary material for: MYOD1 inhibits avian adipocyte differentiation via miRNA-206/KLF4 axis
Source: J Anim Sci Biotechnol. 2021 May 5;12:55. doi: 10.1186/s40104-021-00579-x (PMC8101123; doi:10.1186/s40104-021-00579-x)
Supplement: Supplementary file 5 — Additional file 5: Table S4. List of all DEGs before (day 0) and after adipogenic differentiation (day 5) in MYOD1KO, MYOD1NC and MYOD1OE cells. [file 40104_2021_579_MOESM5_ESM.xlsx]

## Sheet: DEGs between NC day 0 VS day 5
		baseMean	log2FoldChange	lfcSE	pvalue	padj
ENSGALG00000053738		16.3639	-3.81814	1.17468	2.94e-07	2.17e-06
ENSGALG00000042279	CYP24A1	137.222	-3.24191	0.299905	1.88e-30	1.18e-28
ENSGALG00000055112		1097.88	-2.74758	0.109318	1.35e-142	2.07e-139
ENSGALG00000005842	GDPD2	15.9816	-2.71638	1.40654	1.35e-05	7.3e-05
ENSGALG00000045738		1768.24	-2.63564	0.126145	4.88e-100	2.67e-97
ENSGALG00000002840	GRM4	15.5135	-2.59647	1.16991	9.41e-06	5.27e-05
ENSGALG00000003172	SLC16A9	35.9463	-2.49896	0.635089	6.74e-08	5.56e-07
ENSGALG00000046338	PYY	153.219	-2.44932	0.360656	1.32e-14	2.42e-13
ENSGALG00000042548	LRRC6	18.1674	-2.36266	0.845243	3.47e-06	2.1e-05
ENSGALG00000036958		75.847	-2.14237	0.34974	2.42e-12	3.47e-11
ENSGALG00000044996	TMEM71	109.566	-2.12033	0.309736	2.31e-14	4.11e-13
ENSGALG00000034294	ATP6V0D2	8.12934	-2.11029	2.01051	5.56e-05	0.000265636
ENSGALG00000048409	TXNIP	28130.5	-2.0909	0.0711076	2.04e-192	6.26e-189
ENSGALG00000006627	UPB1	25.3755	-2.00242	0.745338	9.4e-06	5.26e-05
ENSGALG00000009033	FAM183A	161.963	-1.99766	0.21482	6.99e-23	2.68e-21
ENSGALG00000019527	SLC6A19	32.9711	-1.99131	0.469647	6.41e-08	5.31e-07
ENSGALG00000020316	IL13RA2	231.621	-1.9601	0.174028	1.16e-31	7.93e-30
ENSGALG00000036678	ETV4	1911.94	-1.91979	0.088281	5.29e-107	3.53e-104
ENSGALG00000049428		10.896	-1.91791	1.40309	0.000100517	0.000456027
ENSGALG00000007109	APOA4	66.4004	-1.89024	0.34136	1.6e-10	1.89e-09
ENSGALG00000050491	SLC35E4	396.622	-1.87127	0.189033	3.07e-25	1.44e-23
ENSGALG00000001347	LHX6	16.6086	-1.85885	0.978733	6.37e-05	0.000300824
ENSGALG00000047182	ACHE	52.6042	-1.85654	0.450479	1.48e-07	1.15e-06
ENSGALG00000033338	GPT2	513.492	-1.85125	0.174768	2.54e-28	1.41e-26
ENSGALG00000002775	FA2H	150.288	-1.83056	0.260911	1.66e-14	3.02e-13
ENSGALG00000010435	RASGRP3	512.337	-1.8301	0.123849	1.83e-51	2.92e-49
ENSGALG00000037228	OR8D4	29.6543	-1.76096	0.723119	2.99e-05	0.000150111
ENSGALG00000052858		103.748	-1.76039	0.632815	1.35e-05	7.28e-05
ENSGALG00000003914	CALR3	95.8084	-1.75832	0.318911	2.66e-10	3.05e-09
ENSGALG00000016102	CYP26B1	128.387	-1.75165	0.309174	1.16e-10	1.39e-09
ENSGALG00000049875		124.822	-1.73783	0.215404	7.22e-18	1.84e-16
ENSGALG00000053587		50.958	-1.73437	0.366892	1.53e-08	1.39e-07
ENSGALG00000038817	CKS2	940.329	-1.73408	0.140968	1e-36	8.8e-35
ENSGALG00000039900		21.2976	-1.72566	0.533998	4.37e-06	2.59e-05
ENSGALG00000041280	FOSB	68.9453	-1.68134	0.510596	4.08e-06	2.44e-05
ENSGALG00000035804	SQSTM1	4304.43	-1.66821	0.0634623	3.88e-154	8.5e-151
ENSGALG00000032506	GEM	22286.5	-1.64565	0.0780657	1.8e-100	1.06e-97
ENSGALG00000004251	ARR3	78.3519	-1.64513	0.339328	1.09e-08	1.01e-07
ENSGALG00000034788	PHLDA1	261.399	-1.62816	0.174982	1.92e-22	7.13e-21
ENSGALG00000010402	HPGDS	24237	-1.62553	0.0866418	2.45e-80	9.63e-78
ENSGALG00000008756	PLEK	13294.5	-1.62413	0.0667067	9.86e-133	1.08e-129
ENSGALG00000038141	NCF4	34.7534	-1.62388	0.523345	8.22e-06	4.65e-05
ENSGALG00000012023	DACT1	1028.06	-1.61724	0.108014	1.76e-52	2.96e-50
ENSGALG00000026426		674.27	-1.61417	0.130302	4.75e-37	4.23e-35
ENSGALG00000013034	CECR2	91.8682	-1.61221	0.340772	2.06e-08	1.84e-07
ENSGALG00000010326	FLVCR2	48.4692	-1.58493	0.554004	1.75e-05	9.26e-05
ENSGALG00000043468	LRRC23	176.073	-1.55747	0.173821	5.54e-21	1.86e-19
ENSGALG00000027036	PKIB	46.4835	-1.5511	0.42284	1.69e-06	1.09e-05
ENSGALG00000029175	EFNB2	251.12	-1.50627	0.161204	1.84e-22	6.85e-21
ENSGALG00000011805		189.882	-1.50319	0.232655	1.75e-12	2.56e-11
ENSGALG00000041263	DCLK1	16.0694	-1.49843	1.15567	0.000294139	0.0012025
ENSGALG00000039264	SLA	554.37	-1.48222	0.141898	3.32e-27	1.7e-25
ENSGALG00000040113	SFT2D3	567.589	-1.47686	0.273828	1.04e-09	1.09e-08
ENSGALG00000026621		41.3286	-1.47361	0.402783	2.1e-06	1.33e-05
ENSGALG00000010122	SH2D4A	112.332	-1.46871	0.240705	1.83e-11	2.38e-10
ENSGALG00000003580	MMP2	26194.9	-1.45922	0.0885768	1.37e-62	3.38e-60
ENSGALG00000039376	DPT	417.34	-1.45118	0.151497	2.25e-23	9.1e-22
ENSGALG00000015692		422.88	-1.43147	0.221859	2.19e-12	3.16e-11
ENSGALG00000005499	IL17RD	448.831	-1.42866	0.182544	1.13e-16	2.55e-15
ENSGALG00000004216	TOR3A	454.304	-1.41046	0.180708	1.4e-16	3.13e-15
ENSGALG00000025948		257.324	-1.40212	0.232407	3.2e-11	4.09e-10
ENSGALG00000009032	PIF1	547.919	-1.4001	0.165496	6.67e-19	1.89e-17
ENSGALG00000050699		102.643	-1.39325	0.315489	1.35e-07	1.06e-06
ENSGALG00000012111	TMEM37	95.7783	-1.3929	0.331398	3.27e-07	2.4e-06
ENSGALG00000006443	MADPRT1	107.267	-1.38924	0.260224	1.67e-09	1.7e-08
ENSGALG00000050629		125.944	-1.37661	0.247847	5.33e-10	5.82e-09
ENSGALG00000037603	SESN2	3576.59	-1.37445	0.074585	2.39e-77	8.95e-75
ENSGALG00000004365		443.186	-1.36661	0.140291	5.7e-24	2.41e-22
ENSGALG00000019768	ACSF2	888.047	-1.36416	0.250877	1.03e-09	1.08e-08
ENSGALG00000008584	NUSAP1	19578	-1.35861	0.0850557	6.17e-59	1.28e-56
ENSGALG00000004568	CELA2A	74.6615	-1.35583	0.303022	1.13e-07	8.99e-07
ENSGALG00000039682	HCLS1	23.928	-1.3553	0.550776	8.63e-05	0.000396882
ENSGALG00000004980	KCNMA1	1211.07	-1.34731	0.133515	1.81e-25	8.58e-24
ENSGALG00000016785	IL1RL1	6492.59	-1.34302	0.0750768	4.76e-73	1.46e-70
ENSGALG00000014690	SLC12A2	1053.89	-1.34154	0.118282	2.54e-31	1.68e-29
ENSGALG00000006325		171.194	-1.32	0.229554	1.96e-10	2.28e-09
ENSGALG00000012681	MBOAT1	31.495	-1.31231	0.488478	5.62e-05	0.000268334
ENSGALG00000001951		1411.57	-1.3069	0.109974	4.9e-34	3.77e-32
ENSGALG00000011889		78.4731	-1.30411	0.256885	7.4e-09	7.01e-08
ENSGALG00000033231	RACGAP1	14419.7	-1.3028	0.0485855	8.08e-160	2.07e-156
ENSGALG00000003944	FAM189A1	768.299	-1.29633	0.0882709	2.86e-50	4.44e-48
ENSGALG00000040869		1158.15	-1.28826	0.127735	2.17e-25	1.02e-23
ENSGALG00000042356	FSTL3	70.9479	-1.28659	0.374266	6.63e-06	3.83e-05
ENSGALG00000042871	SLIT1	150.467	-1.28593	0.288322	1.35e-07	1.06e-06
ENSGALG00000009875	HMGA2	846.707	-1.27851	0.1124	2e-31	1.34e-29
ENSGALG00000003590		105.167	-1.27832	0.286238	1.33e-07	1.04e-06
ENSGALG00000001035		123.092	-1.27065	0.297505	3.08e-07	2.27e-06
ENSGALG00000054302		152.162	-1.26398	0.338438	2.49e-06	1.55e-05
ENSGALG00000009034	ALK	873.685	-1.26333	0.180254	6.98e-14	1.18e-12
ENSGALG00000048349	PRC1	6078.53	-1.26197	0.081694	3.06e-55	5.72e-53
ENSGALG00000051113		161.677	-1.26048	0.249889	9.26e-09	8.65e-08
ENSGALG00000044805	RNF26	1300.49	-1.25998	0.159672	9.5e-17	2.16e-15
ENSGALG00000009854	NEK2	5262.87	-1.25427	0.0829752	5e-53	8.71e-51
ENSGALG00000014011	LRMP	2031.29	-1.25301	0.111343	8.3e-31	5.37e-29
ENSGALG00000046326	IL1R2	407.655	-1.24606	0.128535	1.15e-23	4.78e-22
ENSGALG00000050002	COLEC11	73.0695	-1.24446	0.400734	2.07e-05	0.000107996
ENSGALG00000054262	ITPRID1	7.14814	-1.23955	1.22025	0.000577467	0.00220892
ENSGALG00000017025	CKAP2	11472.5	-1.23821	0.0699252	1.52e-71	4.57e-69
ENSGALG00000045608		124.426	-1.23612	0.310346	1.03e-06	6.87e-06
ENSGALG00000012200	GCH1	1853.96	-1.23183	0.0611144	1.01e-91	5e-89
ENSGALG00000043591	PLA2G4F	127.691	-1.22524	0.259465	4.54e-08	3.85e-07
ENSGALG00000001918	DNAJB5	1660.79	-1.21014	0.0899883	1.33e-42	1.61e-40
ENSGALG00000014878	MAN1A1	1699.83	-1.2038	0.133024	5.3e-21	1.79e-19
ENSGALG00000021733	gga-mir-21	40.8441	-1.20055	0.353133	8.95e-06	5.04e-05
ENSGALG00000044404		2526.56	-1.19976	0.074815	3.11e-59	6.73e-57
ENSGALG00000028318	CDKN1A	178.52	-1.19724	0.263116	1.03e-07	8.22e-07
ENSGALG00000038978		7626.55	-1.197	0.0955584	2.24e-37	2.05e-35
ENSGALG00000009725	SCG5	285.249	-1.19525	0.281425	3.8e-07	2.74e-06
ENSGALG00000003076	FASLG	83.6472	-1.19259	0.551862	0.000269172	0.00111379
ENSGALG00000053422		17.7831	-1.18999	1.14724	0.000713352	0.00267011
ENSGALG00000053916	ABCB1	12.538	-1.18576	0.993303	0.000816176	0.00300873
ENSGALG00000014795	TGIF1	5855.55	-1.1746	0.053749	3.37e-107	2.35e-104
ENSGALG00000025810	CCNB3	18743.3	-1.17426	0.0694773	2e-65	5.59e-63
ENSGALG00000009731	ARHGAP11B	12575.6	-1.17005	0.0911355	4.33e-39	4.37e-37
ENSGALG00000026192	ST8SIA4	320.254	-1.16949	0.193484	4.16e-11	5.22e-10
ENSGALG00000041808	ANO1	41.3538	-1.16905	0.601249	0.000441522	0.00173699
ENSGALG00000050888		253.9	-1.16371	0.529514	0.0002726	0.00112525
ENSGALG00000010164	SMARCA2	41985.8	-1.16314	0.0765877	1.95e-53	3.45e-51
ENSGALG00000011473	RPS6KA2	68.9787	-1.16185	0.47305	0.000151033	0.00066097
ENSGALG00000054783	NDRG1	31329.7	-1.16085	0.0545828	1.07e-101	6.58e-99
ENSGALG00000011084	CCSAP	46.8108	-1.15316	0.349406	1.36e-05	7.36e-05
ENSGALG00000027069	TSC22D4	1228.27	-1.14359	0.16113	4.16e-14	7.2e-13
ENSGALG00000050526		88.8372	-1.14126	0.344789	1.35e-05	7.31e-05
ENSGALG00000008332	F2	548.515	-1.13742	0.0977062	1.1e-32	7.96e-31
ENSGALG00000006848	ZSWIM3	392.933	-1.13243	0.167552	4.38e-13	6.8e-12
ENSGALG00000008349	LMCD1	5518.2	-1.1288	0.0624729	2.7e-74	8.62e-72
ENSGALG00000006995	APOD	84.5131	-1.12671	0.354401	2.13e-05	0.000110643
ENSGALG00000010537	CDKN2C	1802.6	-1.12583	0.108164	9.45e-27	4.72e-25
ENSGALG00000041766	JOSD1	1021.91	-1.12473	0.122173	1.33e-21	4.6e-20
ENSGALG00000046263		1469.68	-1.12248	0.123989	5.41e-21	1.82e-19
ENSGALG00000009909	PRPH2	17.7815	-1.12241	0.986818	0.00101498	0.0036667
ENSGALG00000012165	DLGAP5	14465.3	-1.12223	0.067019	2.93e-64	7.74e-62
ENSGALG00000037740	QRFPR	81.1042	-1.12196	0.403669	7.15e-05	0.000334711
ENSGALG00000007012	ARRDC4	537.511	-1.12144	0.132456	9.47e-19	2.65e-17
ENSGALG00000003443	LRRC52	426.945	-1.12004	0.130937	4.48e-19	1.3e-17
ENSGALG00000043642	ANLN	39352.4	-1.11563	0.103832	2.66e-28	1.47e-26
ENSGALG00000017191	ANGPTL5	87.7896	-1.1142	0.225075	1.7e-08	1.53e-07
ENSGALG00000031447		815.087	-1.11262	0.152899	1.15e-14	2.12e-13
ENSGALG00000046764		54.2449	-1.10708	0.468514	0.000221811	0.000935229
ENSGALG00000005135	SERPINE2	29480.4	-1.10352	0.0737958	6.89e-52	1.14e-49
ENSGALG00000007268		19.4882	-1.10235	0.48763	0.000286289	0.00117511
ENSGALG00000023131	PDXP	4232.15	-1.10053	0.0904029	1.9e-35	1.55e-33
ENSGALG00000036796	HYLS1	5102.36	-1.10021	0.088583	9.06e-37	8.04e-35
ENSGALG00000008998	FAM179A	205.635	-1.09838	0.260033	4.7e-07	3.34e-06
ENSGALG00000027422	gga-mir-125b-1	16.6906	-1.09813	0.463052	0.000223039	0.000939374
ENSGALG00000014324	SLC2A14	17085.3	-1.09768	0.0642705	1.02e-66	2.89e-64
ENSGALG00000000226	TMEM9	375.506	-1.09733	0.200752	1.18e-09	1.23e-08
ENSGALG00000004262	TMIGD1	8.64802	-1.09549	0.795566	0.00114675	0.0040793
ENSGALG00000033093		51.1998	-1.09102	0.337956	1.95e-05	0.000102489
ENSGALG00000030571		14.2915	-1.08983	0.915324	0.0011874	0.00421121
ENSGALG00000029811	BMPER	2780.59	-1.0873	0.0761608	1.42e-47	2e-45
ENSGALG00000012836		14787.4	-1.08673	0.0704259	4.78e-55	8.83e-53
ENSGALG00000006110	PLK1	18195.7	-1.08291	0.0727229	1.76e-51	2.84e-49
ENSGALG00000041906		31.7226	-1.07792	0.646814	0.000945416	0.00343643
ENSGALG00000042748		937.383	-1.0774	0.108604	1.38e-24	6.07e-23
ENSGALG00000004336	INPPL1	56.7958	-1.07192	0.376304	6.62e-05	0.000311995
ENSGALG00000009971	CDC20	10099.2	-1.0682	0.078665	2.42e-43	3.04e-41
ENSGALG00000038720		162.255	-1.06605	0.211469	1.11e-08	1.02e-07
ENSGALG00000035030	KIF20A	11247.2	-1.06592	0.0633727	8.27e-65	2.23e-62
ENSGALG00000046708	PTGES	30.2089	-1.06576	0.519952	0.000509835	0.00197484
ENSGALG00000010939	LIN7A	1864.24	-1.06418	0.137418	3.35e-16	7.32e-15
ENSGALG00000009973	SLC3A1	796.854	-1.05758	0.217447	2.67e-08	2.35e-07
ENSGALG00000006407		9441.21	-1.05691	0.129274	1.06e-17	2.64e-16
ENSGALG00000012629	ZNF367	776.293	-1.05385	0.12352	5.31e-19	1.52e-17
ENSGALG00000039334		40.3183	-1.05253	0.442682	0.000251079	0.0010457
ENSGALG00000010636	PRIMPOL	686.3	-1.04946	0.126263	3.41e-18	9.03e-17
ENSGALG00000011275	DEPDC1	2483.87	-1.04479	0.0854982	1.05e-35	8.68e-34
ENSGALG00000035561	CPNE3	4213.25	-1.04258	0.0627204	2.22e-63	5.58e-61
ENSGALG00000026380	UBE2C	17987.7	-1.04176	0.0598437	3.36e-69	9.71e-67
ENSGALG00000007954		6497.3	-1.03557	0.0731154	6.86e-47	9.48e-45
ENSGALG00000047956		666.264	-1.03061	0.261191	1.59e-06	1.02e-05
ENSGALG00000050615	CKAP2L	16332.9	-1.02977	0.0511127	1.34e-91	6.44e-89
ENSGALG00000031859	NKX3-2	659.883	-1.02675	0.157021	1.85e-12	2.71e-11
ENSGALG00000048187		505.414	-1.02668	0.171938	6.55e-11	8.04e-10
ENSGALG00000036659	NDUFAF8	1195.35	-1.01987	0.121646	1.81e-18	4.92e-17
ENSGALG00000012361	NIN	3685.91	-1.01914	0.113612	1.08e-20	3.52e-19
ENSGALG00000029416	TRPC6	1805.35	-1.01848	0.116496	8.21e-20	2.5e-18
ENSGALG00000030096		28049.7	-1.01695	0.101384	4.31e-25	1.99e-23
ENSGALG00000052055		4417	-1.01294	0.0633505	6.71e-59	1.37e-56
ENSGALG00000050213		43.3688	-1.0111	0.411001	0.000229205	0.000962435
ENSGALG00000037453	TERF1	6055.52	-1.00762	0.0751039	2.05e-42	2.45e-40
ENSGALG00000006267	TPX2	32396.9	-1.00738	0.0683603	1.63e-50	2.55e-48
ENSGALG00000012160	KIF18A	6242.1	-1.00559	0.0730598	1.78e-44	2.29e-42
ENSGALG00000005790		48.4673	-1.00477	0.465669	0.000492135	0.0019179
ENSGALG00000051466	NDFIP2	2280.37	-1.00245	0.125603	4.87e-17	1.14e-15
ENSGALG00000050380	TMPPE	705.031	-1.00097	0.136534	7.24e-15	1.37e-13
ENSGALG00000050232		90.7167	-1.0007	0.256163	1.92e-06	1.22e-05
ENSGALG00000015709	TACC3	29025.5	-0.999931	0.0876562	1.52e-31	1.04e-29
ENSGALG00000004897	GTSE1	6497.11	-0.998998	0.0618543	4.86e-60	1.11e-57
ENSGALG00000032856	GFRA2	37.0816	-0.99859	0.517448	0.000816841	0.00300986
ENSGALG00000012277	MAFF	18674.9	-0.996905	0.0543131	1.34e-76	4.65e-74
ENSGALG00000003438	NUF2	3775.75	-0.995434	0.0993181	4.52e-25	2.08e-23
ENSGALG00000012885	BCL2	220.593	-0.993193	0.189188	3.81e-09	3.73e-08
ENSGALG00000038432		146.668	-0.991076	0.308652	2.52e-05	0.000128784
ENSGALG00000002225	RFFL	1730.5	-0.989115	0.0805806	4.92e-36	4.19e-34
ENSGALG00000017238	GRM5	17.0258	-0.986513	0.940096	0.00167167	0.0056692
ENSGALG00000016059	ETS2	2800.98	-0.984296	0.102235	2.2e-23	8.93e-22
ENSGALG00000010707	GPR68	332.409	-0.982362	0.171114	2.5e-10	2.88e-09
ENSGALG00000011914	CENPM	2335.98	-0.979063	0.0707497	6.02e-45	7.9e-43
ENSGALG00000005408	BCO1	38.4639	-0.977699	0.559446	0.0012273	0.0043337
ENSGALG00000039080	CD44	24486.5	-0.976701	0.0820167	4.11e-34	3.2e-32
ENSGALG00000052361		155.223	-0.976379	0.23422	6.7e-07	4.62e-06
ENSGALG00000006236	TPH1	18.8786	-0.975606	0.664458	0.00177914	0.00599258
ENSGALG00000011683	CENPC	3717.98	-0.97461	0.089766	6.84e-29	3.9e-27
ENSGALG00000002667	OLFML2B	427.846	-0.973914	0.146971	9.95e-13	1.49e-11
ENSGALG00000016875	CLYBL	294.387	-0.972318	0.155238	1.05e-11	1.41e-10
ENSGALG00000011281	SGO1	2382.88	-0.97082	0.107868	7.69e-21	2.53e-19
ENSGALG00000007000	NR2F2	5752.39	-0.96896	0.102259	9.23e-23	3.5e-21
ENSGALG00000003999	NAV2	282.238	-0.968223	0.225522	3.94e-07	2.83e-06
ENSGALG00000035504	ETV1	5244.17	-0.966644	0.0774281	3.47e-37	3.13e-35
ENSGALG00000041763	ADPRM	943.752	-0.96124	0.120515	4.78e-17	1.12e-15
ENSGALG00000050742		4358.45	-0.959784	0.100009	2.83e-23	1.13e-21
ENSGALG00000011668	IL8L1	118.244	-0.957202	0.233011	8.84e-07	5.96e-06
ENSGALG00000035094	CDH17	577.297	-0.956252	0.14558	1.44e-12	2.13e-11
ENSGALG00000034876	PDP1	4608.75	-0.955562	0.0840929	2.31e-31	1.54e-29
ENSGALG00000048440		48.1377	-0.954576	0.489722	0.000917981	0.00334463
ENSGALG00000036892	BUB1B	9378.62	-0.954522	0.0591433	5.32e-60	1.2e-57
ENSGALG00000010195		4313.82	-0.953011	0.115628	5.38e-18	1.39e-16
ENSGALG00000003476	ERN1	4141.04	-0.952526	0.0830837	7.16e-32	5.01e-30
ENSGALG00000023818	HSPB9	380.518	-0.950503	0.158366	5.23e-11	6.52e-10
ENSGALG00000006048		911.416	-0.950205	0.136616	1.02e-13	1.69e-12
ENSGALG00000042908	CTC-575C13.4	514.807	-0.946709	0.0986038	2.65e-23	1.06e-21
ENSGALG00000004689	PKN1	5711.28	-0.945148	0.0826497	9.83e-32	6.79e-30
ENSGALG00000013951	AHI1	2642.24	-0.944665	0.085955	1.49e-29	8.78e-28
ENSGALG00000038385	MTFR1	15622.2	-0.944512	0.0573301	2.13e-62	5.11e-60
ENSGALG00000011331	CTH	209.54	-0.944283	0.208425	1.37e-07	1.07e-06
ENSGALG00000007768	AURKA	9007.44	-0.943613	0.0714617	3.03e-41	3.55e-39
ENSGALG00000015306	OSTM1	2085.66	-0.943504	0.0905197	6.66e-27	3.35e-25
ENSGALG00000001642	GLT8D1	4621.07	-0.940978	0.0973048	1.34e-23	5.55e-22
ENSGALG00000011259	RPE65	125.849	-0.939728	0.267042	9.36e-06	5.24e-05
ENSGALG00000000708	NUCKS1	11854.6	-0.938209	0.0889479	1.77e-27	9.34e-26
ENSGALG00000048498		11.032	-0.937353	0.898837	0.00208715	0.00690422
ENSGALG00000016994	NUDT15	816.977	-0.935352	0.137251	2.67e-13	4.24e-12
ENSGALG00000005684	FBXL15	320.55	-0.928743	0.206255	1.58e-07	1.22e-06
ENSGALG00000013494	CENPN	3888.55	-0.925584	0.0759552	1.27e-35	1.05e-33
ENSGALG00000007331	SVIL	4056.99	-0.92432	0.0876703	1.8e-27	9.48e-26
ENSGALG00000033054	RMC1	4400.19	-0.92283	0.0686381	1.15e-42	1.41e-40
ENSGALG00000053133		21.2246	-0.922812	1.00369	0.00180956	0.00607635
ENSGALG00000010653	SMYD3	183.669	-0.919446	0.243302	3.57e-06	2.15e-05
ENSGALG00000049236	PEBP4	70.9014	-0.919343	0.419449	0.000599557	0.00228714
ENSGALG00000009027	ST6GALNAC3	856.067	-0.916393	0.123716	3.69e-15	7.22e-14
ENSGALG00000006584		8109.65	-0.913087	0.217342	6.22e-07	4.31e-06
ENSGALG00000035568		168.616	-0.912999	0.243541	4.06e-06	2.43e-05
ENSGALG00000016058	ERG	1381.09	-0.912434	0.137868	9.93e-13	1.49e-11
ENSGALG00000015180	PSAT1	1347.1	-0.911194	0.0808802	6.27e-31	4.11e-29
ENSGALG00000034001	SPAG9	6251.48	-0.910579	0.132061	1.49e-13	2.42e-12
ENSGALG00000026449		2319.17	-0.906861	0.15596	1.57e-10	1.86e-09
ENSGALG00000011005	KCNK1	2366.04	-0.90657	0.101729	1.51e-20	4.88e-19
ENSGALG00000032882	EVA1C	161.352	-0.906233	0.176139	6.66e-09	6.35e-08
ENSGALG00000010031	ARHGAP10	2429.64	-0.905345	0.079506	1.56e-31	1.06e-29
ENSGALG00000032717	CCL4	124.716	-0.904573	0.283179	3.2e-05	0.000159694
ENSGALG00000043167	TNFRSF11B	685.231	-0.904201	0.123522	6.95e-15	1.32e-13
ENSGALG00000037051		34292	-0.900941	0.12957	9.8e-14	1.62e-12
ENSGALG00000027874	CHAC1	1424.01	-0.900296	0.141201	4.85e-12	6.71e-11
ENSGALG00000030088		16.748	-0.900109	0.654861	0.00266829	0.00858947
ENSGALG00000014651	LYSMD3	1726.45	-0.899553	0.0945437	5.51e-23	2.14e-21
ENSGALG00000007924	STK17B	1980.48	-0.898246	0.0733891	6.12e-36	5.16e-34
ENSGALG00000016906	SPRY2	5206.02	-0.896003	0.0559824	3.91e-59	8.34e-57
ENSGALG00000000818		263.952	-0.8957	0.233744	3e-06	1.83e-05
ENSGALG00000022758	GGACT	1448.93	-0.893551	0.0752111	4.7e-34	3.64e-32
ENSGALG00000054915		2036.37	-0.891232	0.205321	3.43e-07	2.5e-06
ENSGALG00000012000	METTL14	4232.11	-0.890142	0.105176	7.47e-19	2.11e-17
ENSGALG00000048648		52.4628	-0.888278	0.346802	0.000247304	0.00103053
ENSGALG00000008589	GPR1	768.196	-0.882352	0.129381	2.45e-13	3.9e-12
ENSGALG00000002090	GPSM2	3722.76	-0.881175	0.072441	1.48e-35	1.21e-33
ENSGALG00000015284	RGMB	167.751	-0.880241	0.201024	2.92e-07	2.16e-06
ENSGALG00000004398	CARD11	212.763	-0.879697	0.198817	2.37e-07	1.78e-06
ENSGALG00000047265		89.0738	-0.879336	0.276545	3.57e-05	0.000176803
ENSGALG00000014908	FST	1649.79	-0.878099	0.0902863	6.82e-24	2.87e-22
ENSGALG00000038502	CCNF	3316.95	-0.87669	0.0678834	1.14e-39	1.18e-37
ENSGALG00000004623	AGTRAP	126.255	-0.873354	0.281818	4.78e-05	0.000231142
ENSGALG00000041949	AAMDC	1052.91	-0.871273	0.100093	8.95e-20	2.72e-18
ENSGALG00000008579	OIP5	3035.42	-0.87103	0.101673	2.97e-19	8.7e-18
ENSGALG00000007786	DOK5	32.56	-0.870096	0.508671	0.00198957	0.00661853
ENSGALG00000004161	CCNB1	17720.7	-0.867904	0.0599207	4.62e-49	6.88e-47
ENSGALG00000008700	PDCD4	9296.71	-0.867028	0.0642063	4.45e-43	5.55e-41
ENSGALG00000033379	EAF1	1568.53	-0.86395	0.125241	1.4e-13	2.28e-12
ENSGALG00000045842		7691.4	-0.863791	0.0663785	3.05e-40	3.39e-38
ENSGALG00000010384	CLRN1	87.6016	-0.863624	0.2427	9.32e-06	5.23e-05
ENSGALG00000053749		47.7364	-0.861552	0.498605	0.00199665	0.00664064
ENSGALG00000009452	GALNT16	1134.89	-0.860257	0.102228	1.08e-18	3.01e-17
ENSGALG00000017145	MPHOSPH8	1637.83	-0.859823	0.0961306	1.04e-20	3.39e-19
ENSGALG00000032840		1118.44	-0.85962	0.204217	6.42e-07	4.44e-06
ENSGALG00000052481		14220.5	-0.858161	0.107802	4.65e-17	1.09e-15
ENSGALG00000010120	KIF2C	4787.97	-0.858088	0.0765392	1.03e-30	6.56e-29
ENSGALG00000049528		129.583	-0.857682	0.194273	2.54e-07	1.9e-06
ENSGALG00000037791	FRMD4B	435.848	-0.857301	0.246453	1.28e-05	6.93e-05
ENSGALG00000005074	FAM102A	908.195	-0.856262	0.0976056	4.8e-20	1.48e-18
ENSGALG00000016241	ATP6AP2	5620.79	-0.853569	0.0703633	2.08e-35	1.69e-33
ENSGALG00000024024	TGFA	678.958	-0.852496	0.120179	3.46e-14	6.07e-13
ENSGALG00000004444	SHCBP1	919.218	-0.852363	0.160515	2.8e-09	2.78e-08
ENSGALG00000031482	Pou5f3	410.735	-0.852091	0.154886	9.66e-10	1.02e-08
ENSGALG00000008837	PELI3	4745.48	-0.851199	0.0664874	4.56e-39	4.57e-37
ENSGALG00000016937	DIAPH3	1341.38	-0.848947	0.134101	6.36e-12	8.7e-11
ENSGALG00000008431	SMARCA1	3787.04	-0.848547	0.0915198	5.02e-22	1.8e-20
ENSGALG00000035533	ADIPOR2	4366.56	-0.847753	0.0996061	4.67e-19	1.35e-17
ENSGALG00000032915	CHPF	1793.21	-0.847533	0.140326	4e-11	5.03e-10
ENSGALG00000003574	LPCAT2	8011.97	-0.846679	0.0554471	3.49e-54	6.23e-52
ENSGALG00000015664	ADD1	12899.6	-0.843913	0.0537472	4.24e-57	8.44e-55
ENSGALG00000001270	PRKCZ	27.3746	-0.843478	0.463246	0.00179877	0.00605205
ENSGALG00000048022		464.548	-0.842883	0.16962	1.72e-08	1.56e-07
ENSGALG00000040969	PTP4A3	579.814	-0.840037	0.119392	5.2e-14	8.89e-13
ENSGALG00000010304	MLH3	6121.54	-0.839375	0.097278	1.67e-19	4.98e-18
ENSGALG00000006355	SPTY2D1	2071.69	-0.838914	0.112433	2.26e-15	4.54e-14
ENSGALG00000014938	ABHD3	20.2832	-0.838644	0.582737	0.00334521	0.010504
ENSGALG00000033759	RAVER2	681.034	-0.837826	0.0850557	1.86e-24	8.1e-23
ENSGALG00000002085	FZR1	2646.78	-0.837219	0.0878391	4.21e-23	1.65e-21
ENSGALG00000054412		126.982	-0.835753	0.244522	1.69e-05	8.96e-05
ENSGALG00000008347	ATG13	2612.73	-0.83485	0.133416	1.02e-11	1.37e-10
ENSGALG00000007596		32.3652	-0.834339	0.454074	0.00180259	0.00606209
ENSGALG00000032398	ASPM	13574.9	-0.833504	0.103382	1.99e-17	4.82e-16
ENSGALG00000033260	ST3GAL5	1818.39	-0.832905	0.0987906	9.13e-19	2.56e-17
ENSGALG00000025946	MOB3C	14.4927	-0.832421	0.722929	0.00386598	0.0119173
ENSGALG00000025977	GADD45A	4819.79	-0.831424	0.0706837	1.66e-33	1.25e-31
ENSGALG00000033320		24587.1	-0.830319	0.151617	1.13e-09	1.17e-08
ENSGALG00000049767		51.6604	-0.830203	0.286948	0.000106186	0.000479619
ENSGALG00000033025	RYBP	340.996	-0.829753	0.143251	1.8e-10	2.12e-09
ENSGALG00000003660	FANCF	1363.76	-0.82928	0.0866547	2.87e-23	1.14e-21
ENSGALG00000041202	FBXO32	4667.98	-0.829208	0.0786502	1.48e-27	7.88e-26
ENSGALG00000053878		60.0414	-0.828175	0.352629	0.000541782	0.00208699
ENSGALG00000006780	ARL6IP1	6171.55	-0.826967	0.0948567	7.52e-20	2.3e-18
ENSGALG00000048103	TBCC	2419.89	-0.826955	0.134111	1.82e-11	2.38e-10
ENSGALG00000013583	FAM114A1	4865.71	-0.826683	0.0820092	1.81e-25	8.58e-24
ENSGALG00000014960		2299.17	-0.825672	0.113571	9.43e-15	1.76e-13
ENSGALG00000050787	PORCN	663.055	-0.825457	0.18348	1.8e-07	1.38e-06
ENSGALG00000012808	CDYL	790.177	-0.824309	0.149819	9.8e-10	1.03e-08
ENSGALG00000000721	SLC41A1	2090.26	-0.822229	0.121961	4.09e-13	6.39e-12
ENSGALG00000009965	MPL	449.323	-0.822093	0.232501	1.12e-05	6.13e-05
ENSGALG00000050495		185.551	-0.822008	0.205786	1.74e-06	1.12e-05
ENSGALG00000017239	CTSC	2302.25	-0.821835	0.0996548	4.29e-18	1.13e-16
ENSGALG00000009748	ASNS	21478	-0.821741	0.0609759	5.84e-43	7.22e-41
ENSGALG00000006886	DACH2	154.135	-0.819503	0.267173	6.14e-05	0.000290804
ENSGALG00000052223	YPEL1	1107.92	-0.819353	0.114172	1.87e-14	3.38e-13
ENSGALG00000000255	MAN2A1	613.491	-0.819349	0.183332	2.09e-07	1.58e-06
ENSGALG00000003325		5853.82	-0.81907	0.0654685	1.75e-37	1.61e-35
ENSGALG00000012888	PHLPP1	661.74	-0.818903	0.123314	8.16e-13	1.24e-11
ENSGALG00000003781	SUN1	6788.66	-0.817954	0.0649466	6.1e-38	5.67e-36
ENSGALG00000003932	SDC4	16219.6	-0.817923	0.0852341	2.2e-23	8.93e-22
ENSGALG00000043827	ZHX2	1065.71	-0.816211	0.148839	1.09e-09	1.14e-08
ENSGALG00000010900	SPC25	5368.51	-0.815307	0.0787322	1.05e-26	5.21e-25
ENSGALG00000006424	JADE2	1462.94	-0.812627	0.0786421	1.32e-26	6.53e-25
ENSGALG00000002517	TMEM35B	2879.71	-0.812004	0.110812	6.14e-15	1.17e-13
ENSGALG00000027788	CPE	730.818	-0.811133	0.121088	5.52e-13	8.49e-12
ENSGALG00000008498	MALRD1	70.6474	-0.810849	0.409853	0.00145542	0.00503374
ENSGALG00000019570	C1orf145	251.801	-0.810452	0.232153	1.36e-05	7.36e-05
ENSGALG00000032161	SCUBE2	120.963	-0.810038	0.308053	0.000257588	0.00107135
ENSGALG00000038155	AP3M2	20884.4	-0.810024	0.0742182	2.61e-29	1.52e-27
ENSGALG00000011489	TBXT	173.059	-0.809148	0.390008	0.00116892	0.00415049
ENSGALG00000005263	SOX8	206.822	-0.808632	0.195687	9.88e-07	6.61e-06
ENSGALG00000049576		52.5547	-0.807923	0.322366	0.000373083	0.00148952
ENSGALG00000001038	MAN1C1	2003.36	-0.806965	0.0772361	3.94e-27	2e-25
ENSGALG00000000525	MAP3K3	3156.36	-0.806399	0.087227	6.19e-22	2.19e-20
ENSGALG00000012087	CEP70	1125.52	-0.80495	0.112361	2.06e-14	3.69e-13
ENSGALG00000009305	LBR	12148.5	-0.803517	0.0869498	6.4e-22	2.26e-20
ENSGALG00000012380	SPOPL	886.76	-0.802868	0.133329	4.57e-11	5.73e-10
ENSGALG00000040857	TECTA	42.8246	-0.802592	0.440095	0.00210118	0.00694464
ENSGALG00000053823	FAM219B	579.536	-0.802379	0.0969065	3.23e-18	8.6e-17
ENSGALG00000015249		2718.48	-0.801588	0.0998469	2.6e-17	6.23e-16
ENSGALG00000038951	RASSF1	7148.74	-0.801529	0.0859274	2.83e-22	1.03e-20
ENSGALG00000008408	GAB3	121.79	-0.800922	0.241339	2.66e-05	0.00013521
ENSGALG00000053045		115.949	-0.8008	0.299348	0.000231174	0.000970173
ENSGALG00000008325	CKAP5	17475.2	-0.800071	0.0698999	6.47e-32	4.55e-30
ENSGALG00000001491	NCAPD3	5524.2	-0.800005	0.0838645	3.77e-23	1.49e-21
ENSGALG00000011548	PPP1R13B	2512.54	-0.799299	0.0843431	6.88e-23	2.64e-21
ENSGALG00000014936		3070.16	-0.797094	0.0885545	5.85e-21	1.96e-19
ENSGALG00000013427	SORBS2	29.6051	-0.796579	0.577644	0.00431663	0.0131636
ENSGALG00000033573		3240.95	-0.796437	0.119813	7.9e-13	1.2e-11
ENSGALG00000011176	SCRN1	78.7808	-0.793917	0.366565	0.000987298	0.00357342
ENSGALG00000053759		41.7079	-0.793683	0.505916	0.0034574	0.010801
ENSGALG00000011566	GYPC	757.927	-0.79361	0.154	6.98e-09	6.63e-08
ENSGALG00000030064		2133.55	-0.789745	0.0819584	1.48e-23	6.12e-22
ENSGALG00000049279		18.2351	-0.789033	0.642327	0.00488313	0.0146839
ENSGALG00000031751	SCRN3	2460.94	-0.785993	0.0978782	2.56e-17	6.16e-16
ENSGALG00000051135	BCL2L11	917.789	-0.785526	0.149057	3.76e-09	3.69e-08
ENSGALG00000008088	ACSL4	6953.04	-0.783253	0.0505715	1.09e-55	2.08e-53
ENSGALG00000038940	FBXO43	76.638	-0.780163	0.341276	0.000759217	0.00281891
ENSGALG00000020754	ATP6V0E2	1703.44	-0.780158	0.0805884	9.54e-24	4e-22
ENSGALG00000034232		911.52	-0.779017	0.106168	5.8e-15	1.11e-13
ENSGALG00000000378	SLC25A37	3144.42	-0.778218	0.0740182	1.95e-27	1.02e-25
ENSGALG00000047056		67.45	-0.777113	0.33201	0.000662166	0.00250171
ENSGALG00000012345	UST	497.413	-0.776861	0.129121	4.88e-11	6.1e-10
ENSGALG00000026811		595.697	-0.775316	0.174994	2.75e-07	2.04e-06
ENSGALG00000035199	ODF1	88.4492	-0.774231	0.217691	1.17e-05	6.41e-05
ENSGALG00000034344	MTHFD2	15699.2	-0.773925	0.0603277	2.94e-39	3.01e-37
ENSGALG00000011080	BDKRB2	5710.77	-0.773912	0.0465165	9.67e-64	2.47e-61
ENSGALG00000035973	YIPF6	722.729	-0.772728	0.0971022	4.66e-17	1.09e-15
ENSGALG00000007970	PIAS1	2170.22	-0.772323	0.140114	9.94e-10	1.04e-08
ENSGALG00000049477		35.5665	-0.772192	0.459999	0.00315438	0.00997837
ENSGALG00000007537	INCENP	13899.7	-0.771705	0.0611741	4.55e-38	4.33e-36
ENSGALG00000015441	CD247	237.029	-0.771634	0.243004	4.87e-05	0.000235333
ENSGALG00000050656		418.112	-0.771056	0.173949	2.75e-07	2.04e-06
ENSGALG00000011970	CHADL	398.826	-0.7699	0.178351	4.72e-07	3.36e-06
ENSGALG00000015628	MSANTD1	10.0947	-0.769242	0.844119	0.00406929	0.0124888
ENSGALG00000009944	KAT7	5292.8	-0.767742	0.0829907	5.89e-22	2.09e-20
ENSGALG00000014868	SERINC1	21389.3	-0.767013	0.0949036	1.71e-17	4.17e-16
ENSGALG00000011880	BBS7	2721.51	-0.766806	0.131955	1.74e-10	2.05e-09
ENSGALG00000047102	SAPCD2	897.754	-0.766367	0.134482	3.4e-10	3.84e-09
ENSGALG00000015874	TTK	2760	-0.766131	0.0944297	1.32e-17	3.26e-16
ENSGALG00000015213	TPPP2	7.13976	-0.765987	0.879909	0.0037403	0.0115834
ENSGALG00000011740	MGP	73.4229	-0.764332	0.330154	0.000744242	0.00277288
ENSGALG00000048035	GCNT2	36.4968	-0.763749	0.773099	0.00486551	0.0146395
ENSGALG00000054703	BOLA1	800.182	-0.763496	0.230509	3.05e-05	0.000152943
ENSGALG00000052629	TWSG1	35793.1	-0.762845	0.0689583	5.01e-30	3.04e-28
ENSGALG00000037030	CREBL2	635.696	-0.762602	0.114755	8.35e-13	1.26e-11
ENSGALG00000029523	RAD21	15218.3	-0.762525	0.0583382	1.26e-40	1.41e-38
ENSGALG00000029140	CRABP2	37.2381	-0.762279	0.401175	0.00209839	0.00693988
ENSGALG00000001720		1725.4	-0.762245	0.124595	2.66e-11	3.43e-10
ENSGALG00000007084	DUSP12	1503.54	-0.761771	0.0738893	1.68e-26	8.25e-25
ENSGALG00000039818	GLG1	12015.7	-0.759946	0.0580101	8.57e-41	9.88e-39
ENSGALG00000030153		1098.3	-0.759918	0.113989	7.27e-13	1.11e-11
ENSGALG00000007022	PGPEP1L	36.7512	-0.759838	0.304694	0.000457731	0.00179385
ENSGALG00000004189	MAFK	2852.23	-0.759179	0.0689935	9.67e-30	5.82e-28
ENSGALG00000033304	MYBL1	2253.33	-0.759048	0.124736	3.29e-11	4.19e-10
ENSGALG00000034179	SLC12A4	6042.23	-0.758368	0.0734948	1.54e-26	7.58e-25
ENSGALG00000010542	PAPSS1	14711.6	-0.756331	0.0678667	2.01e-30	1.26e-28
ENSGALG00000005831	DNAI1	377.611	-0.754634	0.117075	3.25e-12	4.6e-11
ENSGALG00000016708	ENPP4	823.46	-0.754195	0.0923093	8.38e-18	2.12e-16
ENSGALG00000016034	ATRN	4131.69	-0.752816	0.120566	1.22e-11	1.61e-10
ENSGALG00000005856	TBC1D9B	3631.75	-0.752036	0.103324	9.38e-15	1.75e-13
ENSGALG00000043044	IL1R1	1423.24	-0.752017	0.119731	9.6e-12	1.29e-10
ENSGALG00000042759		894.37	-0.751669	0.131413	3.1e-10	3.53e-09
ENSGALG00000052425	BATF3	71.5283	-0.75106	0.331284	0.000890678	0.00325443
ENSGALG00000047693		69.0286	-0.749892	0.291332	0.000374822	0.00149568
ENSGALG00000012662	NUAK1	5646.19	-0.749633	0.100592	2.55e-15	5.08e-14
ENSGALG00000014819	JMY	1135.35	-0.748565	0.132654	4.92e-10	5.4e-09
ENSGALG00000039173	RGMA	607.831	-0.74813	0.116283	3.56e-12	5.01e-11
ENSGALG00000020939	SLC35C2	6057.25	-0.747893	0.099119	1.26e-15	2.61e-14
ENSGALG00000004246	SLC6A4	1506.95	-0.747644	0.112084	7.26e-13	1.11e-11
ENSGALG00000040729		511.961	-0.747055	0.10185	6.22e-15	1.18e-13
ENSGALG00000011998	SEC24D	8209.19	-0.745747	0.0956305	1.75e-16	3.89e-15
ENSGALG00000014922	ROCK1	5964.76	-0.745684	0.096765	3.62e-16	7.87e-15
ENSGALG00000019967	MTFR2	4720	-0.745633	0.0576236	7.12e-40	7.59e-38
ENSGALG00000041078	MID1IP1	1829.31	-0.74552	0.0838547	1.66e-20	5.34e-19
ENSGALG00000050390	CYB561D2	3540.64	-0.745424	0.102405	9.46e-15	1.76e-13
ENSGALG00000008902	GIPC2	65.9753	-0.744415	0.318258	0.000751665	0.00279583
ENSGALG00000004927	COQ4	3897.73	-0.744108	0.0664341	1.09e-30	6.88e-29
ENSGALG00000032687	PHLDA2	10959.7	-0.743961	0.066019	5.01e-31	3.3e-29
ENSGALG00000011404	HOPX	16.7605	-0.74281	0.577102	0.0060497	0.017716
ENSGALG00000023571	TRIM59	8983.88	-0.74278	0.0567045	8.86e-41	1.01e-38
ENSGALG00000035913	PPP1R27	317.709	-0.742541	0.195093	4.76e-06	2.81e-05
ENSGALG00000037576	VSX1	9.76665	-0.742355	0.670644	0.00619889	0.0181045
ENSGALG00000016564	PTK2B	209.643	-0.741084	0.221538	2.91e-05	0.000146742
ENSGALG00000004916	DRC3	210.404	-0.736381	0.203372	1.03e-05	5.71e-05
ENSGALG00000040060	NRF1	1048.8	-0.734799	0.0858053	3.08e-19	8.99e-18
ENSGALG00000014952	CERT1	1175.43	-0.734276	0.0970045	1.08e-15	2.25e-14
ENSGALG00000000476	LRRTM4	39.3355	-0.733674	0.333013	0.00112906	0.00402853
ENSGALG00000006715	OAF	3274.65	-0.733449	0.105884	1.26e-13	2.07e-12
ENSGALG00000009128		1291.86	-0.733421	0.107786	2.98e-13	4.71e-12
ENSGALG00000010125	CSGALNACT1	216.152	-0.733363	0.202084	1.01e-05	5.6e-05
ENSGALG00000001342	HCN2	81.4409	-0.732107	0.305	0.000664492	0.00250865
ENSGALG00000030550	ATP2B1	3852.43	-0.731927	0.0591483	9.78e-37	8.63e-35
ENSGALG00000029858		37.5242	-0.731791	0.40658	0.00295368	0.00941141
ENSGALG00000033293	ACAP3	1402.88	-0.731437	0.189968	4.11e-06	2.45e-05
ENSGALG00000041604	NPTXR	204.763	-0.731269	0.256985	0.000172124	0.000744562
ENSGALG00000033739	POU3F3	751.051	-0.731097	0.135308	2.05e-09	2.07e-08
ENSGALG00000014910	COLEC12	7.59409	-0.730422	1.1233	0.00162441	0.00552848
ENSGALG00000043451	DNAL4	4633.51	-0.730276	0.0698994	4.17e-27	2.11e-25
ENSGALG00000006860	KIF3A	733.01	-0.728998	0.112523	2.78e-12	3.96e-11
ENSGALG00000001017	WRAP73	3750.32	-0.728836	0.0993856	6.58e-15	1.25e-13
ENSGALG00000040426	CREG1	6757.74	-0.728156	0.0776659	1.94e-22	7.21e-21
ENSGALG00000054329		454.644	-0.727567	0.257972	0.000189456	0.000812203
ENSGALG00000003058		129.535	-0.72719	0.321201	0.000986277	0.00357141
ENSGALG00000033603	METTL22	301.679	-0.726911	0.163125	2.81e-07	2.08e-06
ENSGALG00000028790	DNASE2B	52.8341	-0.726693	0.325365	0.00107195	0.00385164
ENSGALG00000015073	TMEM39A	6180.53	-0.726633	0.0647252	8.4e-31	5.42e-29
ENSGALG00000009157	ECT2	7521.74	-0.726538	0.0647657	9.25e-31	5.91e-29
ENSGALG00000025751	NMRK2	1459.68	-0.726063	0.170079	6.73e-07	4.64e-06
ENSGALG00000014421	LCORL	810.353	-0.726037	0.150516	4.64e-08	3.92e-07
ENSGALG00000007485	TFRC	4836.69	-0.7257	0.14533	1.93e-08	1.74e-07
ENSGALG00000008233	BUB1	9989.21	-0.725407	0.0397676	6.57e-76	2.19e-73
ENSGALG00000016719	TNFRSF21	5501.68	-0.724736	0.0861869	1.2e-18	3.32e-17
ENSGALG00000011655	IQCB1	1469.65	-0.724201	0.085506	7.13e-19	2.02e-17
ENSGALG00000006427	CARS	6828.19	-0.723939	0.0633591	8.66e-32	6.04e-30
ENSGALG00000010276	GPBP1L1	8481.22	-0.723366	0.0552888	1.13e-40	1.29e-38
ENSGALG00000026360	SOWAHC	273.601	-0.72333	0.224696	4.93e-05	0.000237959
ENSGALG00000007077	CPT1A	1054.46	-0.723099	0.106586	3.54e-13	5.56e-12
ENSGALG00000009021	ST6GALNAC5	21.1871	-0.722951	0.514328	0.00598773	0.0175714
ENSGALG00000006035	PDE3B	2106.11	-0.722163	0.0758349	4.83e-23	1.88e-21
ENSGALG00000004065	SLC25A16	815.225	-0.722031	0.118489	3.44e-11	4.37e-10
ENSGALG00000047410		2424.61	-0.722	0.0870044	3.09e-18	8.23e-17
ENSGALG00000034973	FZD7	3231.99	-0.72173	0.0851153	6.6e-19	1.88e-17
ENSGALG00000009297	TELO2	1889.93	-0.721533	0.0720409	3.71e-25	1.73e-23
ENSGALG00000017008	RCBTB1	7249.09	-0.72061	0.0603367	1.98e-34	1.56e-32
ENSGALG00000004300	PTDSS2	1031.88	-0.72055	0.0985836	8.09e-15	1.52e-13
ENSGALG00000041568	AVL9	1705.76	-0.72045	0.0769203	2.17e-22	7.98e-21
ENSGALG00000014513	CDCA3	7871.79	-0.719965	0.0672832	2.88e-28	1.58e-26
ENSGALG00000027696		685.82	-0.71871	0.17737	1.82e-06	1.16e-05
ENSGALG00000009828	PPP2R5A	7794.84	-0.71863	0.0536824	2.02e-42	2.44e-40
ENSGALG00000027454	CENPW	9063.54	-0.718558	0.0647747	3.85e-30	2.36e-28
ENSGALG00000011031	JAK1	9084.34	-0.716904	0.104262	1.9e-13	3.06e-12
ENSGALG00000028373	GAS2L3	1858.68	-0.716408	0.111574	4.25e-12	5.94e-11
ENSGALG00000005594	OMG	5.04892	-0.715971	1.04816	0.00225156	0.00738946
ENSGALG00000002108		45.5953	-0.715691	0.487574	0.00572183	0.0168783
ENSGALG00000000785	HYAL1	1664.81	-0.715486	0.0812307	3.76e-20	1.17e-18
ENSGALG00000038162	FAM26E	1635.87	-0.715358	0.0777011	9.89e-22	3.45e-20
ENSGALG00000041923	ESPL1	13284.5	-0.715094	0.0389691	9.1e-77	3.25e-74
ENSGALG00000006639	CEP55	1254.48	-0.713557	0.106726	7.2e-13	1.1e-11
ENSGALG00000013723	OASL	124.127	-0.712166	0.315655	0.00107042	0.00384706
ENSGALG00000006318	IL21R	20.8923	-0.711789	0.530005	0.00677078	0.0195293
ENSGALG00000008095	KIF23	8024.23	-0.710986	0.0661057	1.63e-28	9.18e-27
ENSGALG00000027983		21812.8	-0.71084	0.0561284	2.67e-38	2.61e-36
ENSGALG00000030920	APOC3	40.0218	-0.710469	0.490959	0.00603542	0.0176809
ENSGALG00000012863	ADCK2	1028.98	-0.709948	0.107804	1.45e-12	2.13e-11
ENSGALG00000004295	CPD	6985.54	-0.709826	0.103185	1.9e-13	3.06e-12
ENSGALG00000008745	APLF	1649.18	-0.707962	0.0708521	4.91e-25	2.25e-23
ENSGALG00000013422	RHNO1	565.872	-0.707062	0.0861138	6.76e-18	1.74e-16
ENSGALG00000002728	SLC16A3	21281	-0.706006	0.070464	3.75e-25	1.74e-23
ENSGALG00000004309	GDAP1L1	166.075	-0.705873	0.284531	0.000586143	0.0022382
ENSGALG00000015027	JAK2	2533.82	-0.705675	0.106735	1.23e-12	1.83e-11
ENSGALG00000046950		191.054	-0.704617	0.23312	0.000105874	0.000478349
ENSGALG00000041295	EN2	15.6874	-0.704502	0.879673	0.00439834	0.0133755
ENSGALG00000048776		3681.6	-0.703808	0.247728	0.000194683	0.00083159
ENSGALG00000046187	PARP12	941.738	-0.701622	0.257518	0.00028518	0.00117141
ENSGALG00000042030	P4HA3	1694.61	-0.701534	0.10191	1.9e-13	3.06e-12
ENSGALG00000015958	EIF2AK3	5658.04	-0.701214	0.0846374	3.71e-18	9.78e-17
ENSGALG00000015804	LTN1	5780.52	-0.70057	0.143742	3.95e-08	3.38e-07
ENSGALG00000009690	CENPF	12094.4	-0.700434	0.135961	9.15e-09	8.56e-08
ENSGALG00000015433	ABCA1	1554.57	-0.699772	0.157563	3.34e-07	2.45e-06
ENSGALG00000010302		1666.89	-0.698837	0.0702646	8.1e-25	3.67e-23
ENSGALG00000035769		3598.06	-0.698067	0.117842	1.08e-10	1.3e-09
ENSGALG00000005107		1489.25	-0.697427	0.114162	3.42e-11	4.35e-10
ENSGALG00000050687		237.507	-0.696887	0.174083	2.45e-06	1.53e-05
ENSGALG00000005840	DENND5A	5859.79	-0.696839	0.130447	3.27e-09	3.23e-08
ENSGALG00000010535	SGMS2	5130.22	-0.696739	0.0782784	1.75e-20	5.58e-19
ENSGALG00000000336	PPP1R12B	1347.67	-0.696133	0.0802843	1.36e-19	4.09e-18
ENSGALG00000053561		56.2398	-0.696033	0.415097	0.00441799	0.0134199
ENSGALG00000050475		379.661	-0.695295	0.168592	1.46e-06	9.43e-06
ENSGALG00000048723		448.476	-0.694726	0.305096	0.00108831	0.00390127
ENSGALG00000006345	TMEM43	3477.49	-0.693827	0.0950062	9.34e-15	1.75e-13
ENSGALG00000013400	PDCD6	5850.01	-0.693718	0.0877774	8.88e-17	2.04e-15
ENSGALG00000038529	PLPPR3	598.443	-0.692882	0.213078	4.95e-05	0.000238974
ENSGALG00000008586	TUBB4B	49672.2	-0.692454	0.0886155	1.82e-16	4.04e-15
ENSGALG00000002110	TSTD2	424.562	-0.691767	0.123759	8.16e-10	8.66e-09
ENSGALG00000008098	NAMPTP1	3785.89	-0.691751	0.0931372	3.7e-15	7.22e-14
ENSGALG00000003584	KPNA2	41989.4	-0.691621	0.06442	2.16e-28	1.21e-26
ENSGALG00000017002	FNDC3A	3240.95	-0.691087	0.1153	7.22e-11	8.81e-10
ENSGALG00000013911	ZC3HAV1	1231.12	-0.690374	0.0883819	1.88e-16	4.17e-15
ENSGALG00000051414		75.3513	-0.689956	0.250214	0.000269964	0.00111615
ENSGALG00000008803		1833.72	-0.689737	0.097353	4.73e-14	8.13e-13
ENSGALG00000031553	KIF18B	6212.81	-0.687759	0.048012	4.76e-48	6.83e-46
ENSGALG00000045228		2084.37	-0.687656	0.121744	5.9e-10	6.37e-09
ENSGALG00000052557	C4orf46	1147.1	-0.687492	0.17531	3.63e-06	2.18e-05
ENSGALG00000017295	PTHLH	4272.78	-0.686786	0.0684657	3.6e-25	1.68e-23
ENSGALG00000031159	HIST1H110	2072.44	-0.686582	0.0801472	3.54e-19	1.03e-17
ENSGALG00000054803		28.2025	-0.685534	0.365523	0.00306369	0.00971963
ENSGALG00000027635	NME3	5891.97	-0.68549	0.086481	7.63e-17	1.75e-15
ENSGALG00000000417	SLC16A4	51.1783	-0.68536	0.392026	0.00402494	0.0123675
ENSGALG00000008485	CCNYL1	1578.82	-0.684927	0.128858	4e-09	3.89e-08
ENSGALG00000009873	LEMD3	3379.7	-0.684388	0.0754911	4.11e-21	1.39e-19
ENSGALG00000030940	BLB2	295.405	-0.684283	0.186517	1.04e-05	5.79e-05
ENSGALG00000008725	KIF16B	463.783	-0.683977	0.121038	5.91e-10	6.38e-09
ENSGALG00000022874	RAB31	2517.51	-0.683532	0.0988807	1.67e-13	2.71e-12
ENSGALG00000001595	PHF19	14209	-0.683488	0.0976658	9.09e-14	1.51e-12
ENSGALG00000045642	TNFRSF11A	701.575	-0.682853	0.129263	4.83e-09	4.67e-08
ENSGALG00000030676		214.09	-0.682788	0.215104	6.84e-05	0.000321534
ENSGALG00000027231	NRARP	27.565	-0.682376	0.442721	0.00598897	0.0175717
ENSGALG00000012903	PIGN	1061.43	-0.682248	0.0834344	9.93e-18	2.49e-16
ENSGALG00000048883		462.995	-0.68209	0.186734	1.13e-05	6.17e-05
ENSGALG00000036297	ABHD8	336.493	-0.681796	0.173156	3.48e-06	2.1e-05
ENSGALG00000040856	CPNE1	4686.27	-0.681738	0.0590056	2.3e-32	1.63e-30
ENSGALG00000010179	RFX3	371.545	-0.680092	0.173913	3.93e-06	2.35e-05
ENSGALG00000052196		977.766	-0.67868	0.119592	5.26e-10	5.75e-09
ENSGALG00000042739	TACC1	13209.4	-0.67745	0.0472085	3.47e-48	5.06e-46
ENSGALG00000030442	FOXC1	2357.19	-0.676284	0.105761	5.98e-12	8.2e-11
ENSGALG00000044501		96.394	-0.676192	0.245549	0.000290055	0.00118898
ENSGALG00000051063		39.1372	-0.675841	0.494049	0.00790541	0.0223029
ENSGALG00000016582	PBK	3583.7	-0.675688	0.103359	2.32e-12	3.33e-11
ENSGALG00000025780	ITPRIP	1249.26	-0.673796	0.122683	1.56e-09	1.6e-08
ENSGALG00000040746	CHMP1B	3452.61	-0.67349	0.0841942	4.48e-17	1.06e-15
ENSGALG00000050165		126.972	-0.672533	0.248679	0.00034441	0.00138466
ENSGALG00000041114	GOLGA4	4548.1	-0.671629	0.151397	3.89e-07	2.8e-06
ENSGALG00000031650	BBS9	547.512	-0.670504	0.154328	5.99e-07	4.17e-06
ENSGALG00000014788	CENPH	3289.18	-0.670233	0.116848	3.82e-10	4.27e-09
ENSGALG00000035919	EPN2	5220.92	-0.670022	0.0822072	1.32e-17	3.26e-16
ENSGALG00000048860	GRK1	102.095	-0.669403	0.248211	0.000357593	0.00143103
ENSGALG00000051954	RBM43	1187.22	-0.668462	0.099678	7.62e-13	1.16e-11
ENSGALG00000008172	ERLEC1	8479.09	-0.666197	0.0717202	5.66e-22	2.01e-20
ENSGALG00000007474	PCYT1A	4046	-0.665599	0.299994	0.00144495	0.00500432
ENSGALG00000009252	PLD1	1606.26	-0.665177	0.108336	3.28e-11	4.18e-10
ENSGALG00000010901		127.613	-0.664701	0.353276	0.0033179	0.0104268
ENSGALG00000008477	EXOC4	3034.54	-0.663692	0.0761647	1.09e-19	3.31e-18
ENSGALG00000049600		93.4898	-0.663667	0.293837	0.00131053	0.00458955
ENSGALG00000041514		2930.09	-0.663266	0.0706107	2.14e-22	7.91e-21
ENSGALG00000016768	LONRF2	840.957	-0.66277	0.141047	1.14e-07	9.05e-07
ENSGALG00000040131		6247.71	-0.662436	0.0661796	5.07e-25	2.31e-23
ENSGALG00000051777		74.9686	-0.662183	0.29096	0.0012595	0.00443615
ENSGALG00000048771		18311.2	-0.662155	0.0582972	2.44e-31	1.62e-29
ENSGALG00000002599	ARHGEF39	1948.26	-0.661669	0.0686018	1.91e-23	7.85e-22
ENSGALG00000039786	FGFR1	61883.4	-0.660832	0.0401074	1.91e-62	4.66e-60
ENSGALG00000007426	MKX	1889.81	-0.659685	0.118881	1.21e-09	1.25e-08
ENSGALG00000038799		24.2782	-0.659216	0.395445	0.00533076	0.015865
ENSGALG00000046646		77.4624	-0.658904	0.29583	0.00145589	0.00503426
ENSGALG00000003107	AMFR	4267.62	-0.658731	0.0875918	2.14e-15	4.33e-14
ENSGALG00000009957	TIE1	232.699	-0.658294	0.219221	0.000138996	0.000613364
ENSGALG00000015363	HJURP	3608.58	-0.657592	0.0809593	1.78e-17	4.33e-16
ENSGALG00000011094	PDE4B	757.703	-0.657477	0.0956526	2.52e-13	4.01e-12
ENSGALG00000011783	HIST1H111R	138.322	-0.657019	0.168978	4.83e-06	2.84e-05
ENSGALG00000007575		2516.89	-0.656745	0.102233	5.45e-12	7.52e-11
ENSGALG00000027981	AASDHPPT	549.1	-0.656608	0.136599	6.84e-08	5.64e-07
ENSGALG00000050829		80.3467	-0.655321	0.298838	0.00162037	0.00551716
ENSGALG00000029585	FUNDC2	1266.27	-0.653799	0.141019	1.63e-07	1.25e-06
ENSGALG00000023364	CDC42EP4	4735.85	-0.652629	0.0961298	4.69e-13	7.26e-12
ENSGALG00000002447	CTNNA1	25664.6	-0.651668	0.0615098	1.23e-27	6.57e-26
ENSGALG00000003922	TOP2A	32318.5	-0.650005	0.0833358	2.54e-16	5.6e-15
ENSGALG00000045246	GOLIM4	3859.37	-0.649718	0.112153	3.03e-10	3.46e-09
ENSGALG00000026038	ERI2	2283.1	-0.648792	0.250743	0.000550174	0.0021156
ENSGALG00000000994		20.3427	-0.648489	0.686896	0.00938691	0.0259574
ENSGALG00000002870	LEMD2	1639.84	-0.648261	0.116553	1.19e-09	1.24e-08
ENSGALG00000005584	GALNT18	4773.46	-0.647501	0.0582262	3.95e-30	2.42e-28
ENSGALG00000053788	TNFSF8	29.7263	-0.646711	0.426172	0.00739093	0.0210633
ENSGALG00000053640	GZF1	4353.09	-0.646136	0.106721	6.25e-11	7.7e-10
ENSGALG00000009047	YPEL5	6174.48	-0.646103	0.0641158	2.82e-25	1.33e-23
ENSGALG00000038420	HSF2	8570.77	-0.645612	0.0609365	1.27e-27	6.78e-26
ENSGALG00000010575	INTS12	1001.6	-0.645501	0.0784448	7.9e-18	2e-16
ENSGALG00000013575	IFI6	37.5297	-0.644776	0.520426	0.01052	0.0287076
ENSGALG00000003507	TECPR1	2526.54	-0.644379	0.14461	4.08e-07	2.92e-06
ENSGALG00000014801	NDC80	6258.55	-0.64352	0.0679221	1.11e-22	4.2e-21
ENSGALG00000028438	CLK1	3188.25	-0.643195	0.129942	3.54e-08	3.04e-07
ENSGALG00000006410	HTATSF1	2760.55	-0.643193	0.0843789	1.07e-15	2.24e-14
ENSGALG00000001506	PTTG2	2663.71	-0.642063	0.0740912	1.9e-19	5.63e-18
ENSGALG00000007825	KIAA1841	654.562	-0.642052	0.123143	8.73e-09	8.17e-08
ENSGALG00000035966	EDA	681.089	-0.641947	0.14277	3.41e-07	2.49e-06
ENSGALG00000000949	HBEGF	1101.18	-0.641406	0.0860813	4.04e-15	7.85e-14
ENSGALG00000003663	RBL2	2359.65	-0.641191	0.0878994	1.31e-14	2.41e-13
ENSGALG00000025475	gga-mir-1586	5.12856	-0.640935	0.776956	0.00743736	0.0211772
ENSGALG00000039872	PDLIM4	1057.12	-0.640684	0.169319	8.11e-06	4.6e-05
ENSGALG00000014703	PRRC1	5472.94	-0.640567	0.073787	1.67e-19	4.98e-18
ENSGALG00000011511	CKB	5340.46	-0.640422	0.0762524	1.94e-18	5.25e-17
ENSGALG00000012852	MKRN4P	13238.7	-0.64032	0.110368	3.05e-10	3.47e-09
ENSGALG00000004769	PSAP	14113.9	-0.639772	0.1129	6.82e-10	7.32e-09
ENSGALG00000006837	TSPAN4	595.309	-0.63889	0.190283	4.34e-05	0.000211206
ENSGALG00000002878	CREBRF	457.541	-0.638819	0.194428	5.66e-05	0.000269703
ENSGALG00000014907	DCBLD1	59.5673	-0.638661	0.320153	0.00287582	0.00918659
ENSGALG00000010035	NR3C2	1206.68	-0.638487	0.0842944	1.6e-15	3.27e-14
ENSGALG00000009135	PLEKHA3	2901.8	-0.637783	0.085804	4.74e-15	9.15e-14
ENSGALG00000021529	GP1BB	1239.81	-0.637772	0.214381	0.000169018	0.000732155
ENSGALG00000036497	SOX4	573.221	-0.63768	0.163385	5.03e-06	2.95e-05
ENSGALG00000004965	SLC27A4	3332.04	-0.637269	0.0959037	1.39e-12	2.06e-11
ENSGALG00000022891		692.439	-0.637104	0.128054	3.21e-08	2.78e-07
ENSGALG00000013006	ROPN1L	93.4686	-0.636706	0.258834	0.00084885	0.00311644
ENSGALG00000006594	POFUT1	4656.41	-0.636577	0.0649652	4.92e-24	2.09e-22
ENSGALG00000004227	FAM20B	3068.86	-0.635714	0.0703604	7.19e-21	2.38e-19
ENSGALG00000016548	SYAP1	2481.33	-0.634987	0.0791032	4.47e-17	1.06e-15
ENSGALG00000025103	SNORA54	5.26473	-0.634738	0.614316	0.0113879	0.0307534
ENSGALG00000004618	TAX1BP3	10214.9	-0.634705	0.062413	1.18e-25	5.65e-24
ENSGALG00000002800	GRK7	131.669	-0.634109	0.213578	0.000175689	0.000757844
ENSGALG00000013420	FOXM1	5124.48	-0.63392	0.144878	6.31e-07	4.38e-06
ENSGALG00000014729	DEPDC1B	1157.01	-0.633887	0.0719194	5.39e-20	1.65e-18
ENSGALG00000010733	CEP170	6837.01	-0.63341	0.137428	2.08e-07	1.58e-06
ENSGALG00000010837	ASB5	1540.56	-0.632785	0.0766838	7.07e-18	1.81e-16
ENSGALG00000042210	RABEPK	5666.85	-0.632657	0.0634951	9.71e-25	4.33e-23
ENSGALG00000015573	FHL5	3005.41	-0.632377	0.0868647	1.55e-14	2.82e-13
ENSGALG00000003161	GDF3	286.96	-0.63195	0.240827	0.000534738	0.00206296
ENSGALG00000008881	RGS3	11789.8	-0.63162	0.0782647	3.22e-17	7.65e-16
ENSGALG00000016485	RHOB	775.914	-0.631403	0.131303	7.82e-08	6.37e-07
ENSGALG00000006016	PASK	2300.65	-0.630954	0.0665068	1.07e-22	4.06e-21
ENSGALG00000043909		1243.74	-0.63045	0.119574	6.8e-09	6.47e-08
ENSGALG00000015995	PTPRA	6692.11	-0.630151	0.0513578	5.81e-36	4.92e-34
ENSGALG00000040279	RHCE	492.91	-0.629201	0.199421	9.5e-05	0.000434081
ENSGALG00000053125		15.5913	-0.628952	0.520655	0.0117252	0.0315421
ENSGALG00000009360	CAPN2	16071.3	-0.628238	0.0539678	1.15e-32	8.23e-31
ENSGALG00000000881	GPATCH3	1868.59	-0.628206	0.0887641	7.06e-14	1.19e-12
ENSGALG00000015177	GNAQ	2157.47	-0.627816	0.0968225	4.37e-12	6.09e-11
ENSGALG00000008508	PYGB	54.327	-0.627545	0.341193	0.00433451	0.0132133
ENSGALG00000054536		1510.1	-0.627356	0.0889493	8.46e-14	1.41e-12
ENSGALG00000041093	MMP24	286.867	-0.626854	0.135244	1.91e-07	1.46e-06
ENSGALG00000015464	PTGFRN	1062.48	-0.626787	0.180238	2.95e-05	0.000148332
ENSGALG00000011395	SARAF	3968.96	-0.626636	0.0808171	4.26e-16	9.24e-15
ENSGALG00000005855	CA5B	571.14	-0.626413	0.159359	4.76e-06	2.81e-05
ENSGALG00000004098	STK4	3191.29	-0.624914	0.0665966	3e-22	1.09e-20
ENSGALG00000006562	MCF2	451.132	-0.623984	0.248715	0.000784355	0.00290189
ENSGALG00000036789	ADGRL2	50.1881	-0.623821	0.319675	0.00342076	0.0107118
ENSGALG00000043208	TRAFD1	4843.56	-0.622957	0.079896	3.1e-16	6.79e-15
ENSGALG00000052796		1914.68	-0.62289	0.101398	4.14e-11	5.2e-10
ENSGALG00000030597	KIF11	3902.22	-0.622729	0.062393	8.8e-25	3.94e-23
ENSGALG00000008629	MRC1	32.0682	-0.62258	0.530268	0.012379	0.0330057
ENSGALG00000016512	NRBP1	5413.49	-0.62246	0.0676712	1.75e-21	6.02e-20
ENSGALG00000016067	HMGN1	4546.81	-0.622116	0.0697862	2.37e-20	7.46e-19
ENSGALG00000037307	IQCD	587.255	-0.621933	0.0902971	2.86e-13	4.52e-12
ENSGALG00000034430	CMC2	1059.13	-0.621752	0.107404	3.7e-10	4.15e-09
ENSGALG00000009907	G2E3	5119.17	-0.621686	0.0960311	4.88e-12	6.75e-11
ENSGALG00000006417	SEC24A	8320.93	-0.621137	0.0478138	6.49e-40	6.96e-38
ENSGALG00000047800		805.6	-0.620942	0.135383	2.5e-07	1.87e-06
ENSGALG00000039999		652.595	-0.620858	0.133096	1.71e-07	1.32e-06
ENSGALG00000006697	TOLLIP	7249.54	-0.620746	0.107388	3.92e-10	4.38e-09
ENSGALG00000005509	DPYD	2114.9	-0.620376	0.105819	2.39e-10	2.76e-09
ENSGALG00000011870	HIF1A	66155	-0.620149	0.0648361	5.47e-23	2.12e-21
ENSGALG00000005506	HESX1	1155.51	-0.620092	0.194604	8.94e-05	0.000409635
ENSGALG00000048716	FBXL3	905.084	-0.619916	0.0853594	1.92e-14	3.47e-13
ENSGALG00000036380	SLC48A1	2938.4	-0.619254	0.0818523	1.95e-15	3.96e-14
ENSGALG00000009466	SEC23IP	2185.74	-0.618999	0.0951287	3.98e-12	5.59e-11
ENSGALG00000048098	LDLRAP1	351.91	-0.618464	0.186126	5.51e-05	0.000263581
ENSGALG00000041640	TWIST1	4982.4	-0.618404	0.068657	1.05e-20	3.43e-19
ENSGALG00000015020	TMEM171	8531.27	-0.618186	0.0563261	2.45e-29	1.44e-27
ENSGALG00000012984		40.013	-0.618036	0.401849	0.00822555	0.0230837
ENSGALG00000030908		233.367	-0.617787	0.307452	0.0030698	0.00973288
ENSGALG00000037289	ATL2	3413.19	-0.617402	0.0870511	6.82e-14	1.15e-12
ENSGALG00000009619	GPR176	1271.07	-0.617252	0.0770626	5.84e-17	1.36e-15
ENSGALG00000003144	TRIM25	1642.7	-0.61706	0.107303	4.8e-10	5.28e-09
ENSGALG00000042009	HMMR	2706.27	-0.616607	0.126635	6.31e-08	5.23e-07
ENSGALG00000015051	CDK19	877.038	-0.615707	0.155238	4.36e-06	2.59e-05
ENSGALG00000031996		103.892	-0.615547	0.320297	0.00381438	0.0117829
ENSGALG00000047248	DESI1	5869.15	-0.615493	0.0768947	6.18e-17	1.43e-15
ENSGALG00000004017	TOR1AIP2	2205.44	-0.613622	0.0772396	1.02e-16	2.31e-15
ENSGALG00000004266	TNFAIP8L1	3081.54	-0.612983	0.098021	2.19e-11	2.84e-10
ENSGALG00000030450	CLIP2	1599.73	-0.612841	0.112586	2.94e-09	2.91e-08
ENSGALG00000016931	BORA	1417.91	-0.611704	0.105177	3.37e-10	3.81e-09
ENSGALG00000001235	ANKRD24	19.4309	-0.611164	0.466692	0.0118331	0.03176
ENSGALG00000015691	SMC2	10432.3	-0.610573	0.0914865	1.37e-12	2.02e-11
ENSGALG00000006503	VDAC1	993.977	-0.610217	0.117472	1.19e-08	1.09e-07
ENSGALG00000008659	HACD1	422.943	-0.609816	0.111925	2.91e-09	2.89e-08
ENSGALG00000011571	AGPAT4	945.424	-0.608996	0.104214	2.9e-10	3.32e-09
ENSGALG00000006833	ITIH2	58.2513	-0.608065	0.303958	0.00328979	0.0103491
ENSGALG00000003757	POMT1	3495.66	-0.60759	0.060415	4.56e-25	2.09e-23
ENSGALG00000004460	FOXK1	2593.29	-0.607131	0.0837475	2.32e-14	4.14e-13
ENSGALG00000006057	CLK4	3072.36	-0.606427	0.107668	1.04e-09	1.09e-08
ENSGALG00000028174	CAVIN2	10684.4	-0.606418	0.104275	3.5e-10	3.94e-09
ENSGALG00000049181	CHST14	1299.51	-0.606378	0.16184	1.15e-05	6.3e-05
ENSGALG00000041036	FTO	205.167	-0.606355	0.189759	9.35e-05	0.000427973
ENSGALG00000033772	UPF2	3877.62	-0.606199	0.119859	2.54e-08	2.24e-07
ENSGALG00000012974	WASH1	2357.35	-0.605999	0.074452	2.19e-17	5.29e-16
ENSGALG00000010745	HMGB2	22852.3	-0.605848	0.0535932	6.67e-31	4.35e-29
ENSGALG00000003081	SUCO	2012.09	-0.605215	0.119346	2.38e-08	2.11e-07
ENSGALG00000033195	IGF2BP2	2649	-0.604635	0.0936144	6.08e-12	8.34e-11
ENSGALG00000006446	NAP1L4	21736.5	-0.604088	0.0497354	3.25e-35	2.63e-33
ENSGALG00000040796	AOPEP	2043.81	-0.603588	0.0711935	1.28e-18	3.54e-17
ENSGALG00000011615		17.7749	-0.602586	0.470901	0.0127961	0.0339936
ENSGALG00000015436	SDCBP	22817.7	-0.602359	0.0720861	3.67e-18	9.69e-17
ENSGALG00000025996		10605.9	-0.601854	0.118299	2.23e-08	1.99e-07
ENSGALG00000007687	MAP2K1	7650.3	-0.601273	0.0719497	3.67e-18	9.7e-17
ENSGALG00000020736	PHOSPHO2	654.93	-0.601025	0.0978095	4.77e-11	5.97e-10
ENSGALG00000013607	FBXO5	4265.12	-0.601022	0.0623836	3.23e-23	1.28e-21
ENSGALG00000006708		52.7103	-0.600372	0.289138	0.00284223	0.00908839
ENSGALG00000009312	RPL22L1	2781.62	-0.600227	0.0799177	3.43e-15	6.73e-14
ENSGALG00000023708	UBXN10	336.576	-0.600207	0.126259	1.26e-07	9.92e-07
ENSGALG00000013628	C6orf62	9309.34	-0.600198	0.0599982	8.31e-25	3.75e-23
ENSGALG00000031035	PCMTD1	2030.86	-0.600067	0.078215	9.85e-16	2.07e-14
ENSGALG00000028180		7.0043	-0.59983	0.561777	0.0144317	0.0376028
ENSGALG00000010136	HGSNAT	1692.34	-0.599009	0.0774598	6.15e-16	1.31e-14
ENSGALG00000003657	UNC119	246.372	-0.598167	0.171628	3.38e-05	0.000167943
ENSGALG00000009470	SERPINI1	3279.81	-0.597631	0.0874685	5.02e-13	7.74e-12
ENSGALG00000002414	TSPAN14	1834.78	-0.597375	0.0892769	1.34e-12	1.98e-11
ENSGALG00000052628		16.2389	-0.597252	0.575278	0.0145446	0.0377944
ENSGALG00000035814		2645.19	-0.597188	0.0913408	3.79e-12	5.32e-11
ENSGALG00000008681	NSMF	319.135	-0.596992	0.134981	6.38e-07	4.42e-06
ENSGALG00000014298	RFC1	5826.61	-0.596675	0.0878848	6.84e-13	1.05e-11
ENSGALG00000039088	TRAPPC5	1220.61	-0.596505	0.145248	2.68e-06	1.65e-05
ENSGALG00000028664	CKS1B	16532.4	-0.595844	0.0864272	3.3e-13	5.19e-12
ENSGALG00000040926	SAMSN1	19.6804	-0.595794	0.45737	0.0129566	0.0343493
ENSGALG00000027871	MAD2L1BP	3098.68	-0.595786	0.0693803	5.29e-19	1.52e-17
ENSGALG00000035029		4881.7	-0.595287	0.156412	9.68e-06	5.41e-05
ENSGALG00000011099	FAP	6642.35	-0.594988	0.086704	4.16e-13	6.48e-12
ENSGALG00000019835	TRIM27.2	24.9784	-0.594723	0.528724	0.0148523	0.038483
ENSGALG00000002203	FGF18	100.882	-0.594512	0.231967	0.00078087	0.00289108
ENSGALG00000012295	CDKL1	635.736	-0.594224	0.124865	1.28e-07	1.01e-06
ENSGALG00000002099		2052.97	-0.594219	0.165617	2.33e-05	0.000120255
ENSGALG00000005757	IRF8	4924.16	-0.594205	0.0703729	1.85e-18	5.02e-17
ENSGALG00000001938	SLC25A24	2523.72	-0.594173	0.0933782	1.23e-11	1.64e-10
ENSGALG00000010190	TBC1D15	4773.49	-0.593873	0.0614916	2.72e-23	1.09e-21
ENSGALG00000002655	ITGAV	32884.9	-0.593648	0.113232	1.02e-08	9.48e-08
ENSGALG00000051585		32.5509	-0.593385	0.418311	0.0112843	0.0305272
ENSGALG00000015435		1160.89	-0.592767	0.124197	1.2e-07	9.54e-07
ENSGALG00000001204	ENKD1	2058.88	-0.592415	0.0755105	2.66e-16	5.83e-15
ENSGALG00000005768	ETV5	2948.07	-0.590959	0.116426	2.56e-08	2.26e-07
ENSGALG00000036539	EFNB1	4344.05	-0.590925	0.102029	4.52e-10	4.99e-09
ENSGALG00000000104		275.31	-0.590894	0.199207	0.000224662	0.000945429
ENSGALG00000040758	INSR	965.783	-0.590656	0.10511	1.25e-09	1.3e-08
ENSGALG00000027860	CISD2	4992.48	-0.589905	0.0707998	4.96e-18	1.29e-16
ENSGALG00000054260		315.806	-0.589748	0.232138	0.000856099	0.00314005
ENSGALG00000038721	MAP1LC3A	3376.73	-0.58968	0.058831	7.42e-25	3.37e-23
ENSGALG00000042624	CEP85	1908.82	-0.58962	0.0963083	6e-11	7.41e-10
ENSGALG00000016285		812.542	-0.589558	0.152141	7.55e-06	4.3e-05
ENSGALG00000000511	KCTD20	3119.05	-0.589365	0.0744216	1.51e-16	3.37e-15
ENSGALG00000010183	RAB21	6353.67	-0.589306	0.0659603	2.56e-20	8.04e-19
ENSGALG00000001450	IGSF9B	3.79774	-0.589175	0.964129	0.00347126	0.0108355
ENSGALG00000000390	ENTPD4	6875.71	-0.58893	0.124272	1.46e-07	1.14e-06
ENSGALG00000013002	DAP	14797.8	-0.588476	0.0729296	4.49e-17	1.06e-15
ENSGALG00000002911	MOXD1	76.2302	-0.587753	0.52216	0.0154888	0.0398668
ENSGALG00000027147		411.198	-0.587749	0.253767	0.00162964	0.00553889
ENSGALG00000007547	ABI1	3954.19	-0.587496	0.0713332	1.14e-17	2.84e-16
ENSGALG00000006108	FAM122B	3531.48	-0.586629	0.0691994	1.48e-18	4.06e-17
ENSGALG00000009365	CYP51A1	24962.4	0.586638	0.0595511	4.29e-24	1.83e-22
ENSGALG00000009732	PCDH18	520.042	0.586829	0.153979	1e-05	5.57e-05
ENSGALG00000032219	FUS	22863	0.586861	0.0593797	3.11e-24	1.34e-22
ENSGALG00000040161	C7orf25	646.669	0.587222	0.109337	5.3e-09	5.09e-08
ENSGALG00000028005	GADD45G	245.948	0.587616	0.161347	1.97e-05	0.000103228
ENSGALG00000011798	HEBP1	61.0685	0.587884	0.279599	0.00283967	0.0090821
ENSGALG00000014391	CCDC149	271.172	0.588371	0.23129	0.000854165	0.00313371
ENSGALG00000006134	HOGA1	62.3192	0.588436	0.356553	0.00777032	0.0219906
ENSGALG00000044678		25.0025	0.588529	0.481981	0.0146017	0.0379217
ENSGALG00000025550	gga-mir-1774	11.655	0.58857	0.48674	0.0147346	0.0382297
ENSGALG00000053565		100.054	0.589952	0.269427	0.00225167	0.00738946
ENSGALG00000010090	FAM160A1	650.984	0.590108	0.0942272	2.44e-11	3.16e-10
ENSGALG00000011366	MOK	29.336	0.590124	0.357484	0.00769777	0.0218175
ENSGALG00000050520		10.656	0.590529	0.460365	0.0136269	0.035804
ENSGALG00000009495	FGFR2	1375.35	0.591163	0.0963381	5.42e-11	6.73e-10
ENSGALG00000034478	CCL4	5997.97	0.591471	0.0792249	5.17e-15	9.94e-14
ENSGALG00000003733	LIFR	532.991	0.59259	0.230929	0.000781714	0.00289351
ENSGALG00000007141	LRRK1	2446.29	0.592817	0.118332	3.58e-08	3.08e-07
ENSGALG00000028551		3809.58	0.592836	0.0816655	2.41e-14	4.29e-13
ENSGALG00000033365	ALDH1A3	4149.66	0.593445	0.0550079	2.32e-28	1.29e-26
ENSGALG00000047166		816.999	0.593598	0.0865289	4.27e-13	6.65e-12
ENSGALG00000015593	EPHA7	50.9922	0.593637	0.315637	0.0046694	0.0141103
ENSGALG00000051765		24141.7	0.594253	0.104495	8.22e-10	8.71e-09
ENSGALG00000027887		163.368	0.594504	0.376176	0.00858982	0.0239955
ENSGALG00000023415	HMX3	140.963	0.594869	0.28496	0.00284352	0.00909061
ENSGALG00000035392		1951.08	0.594998	0.19197	0.000139693	0.000616087
ENSGALG00000007247	TGFB1I1	23770	0.595563	0.038863	3e-54	5.41e-52
ENSGALG00000004231		2194.53	0.595753	0.078774	2.38e-15	4.76e-14
ENSGALG00000053885		171.533	0.596345	0.147095	3.37e-06	2.04e-05
ENSGALG00000050532	B3GNT3	366.88	0.597895	0.237295	0.00087052	0.00318808
ENSGALG00000035998	HINTW	45790.5	0.598057	0.0924525	5.97e-12	8.2e-11
ENSGALG00000034236		74.2065	0.598581	0.254125	0.00138173	0.00480924
ENSGALG00000002183	PRR16	30.6191	0.598961	0.492248	0.0138085	0.0362315
ENSGALG00000009895	GRIP1	12.6251	0.599157	0.545109	0.0145173	0.0377489
ENSGALG00000052008		28.0114	0.599201	0.423868	0.0110253	0.0298952
ENSGALG00000049235		7.50826	0.599584	0.740405	0.00965038	0.0266284
ENSGALG00000015258	DCBLD2	26968.6	0.600396	0.0432596	4.7e-45	6.21e-43
ENSGALG00000051271		4071.77	0.601234	0.141565	1.39e-06	9.07e-06
ENSGALG00000034806		3.79645	0.601254	0.987408	0.00307188	0.00973746
ENSGALG00000008716	FLRT3	23.1135	0.60332	0.473202	0.0128047	0.0339989
ENSGALG00000015537	MAN2B2	888.923	0.603514	0.119961	2.97e-08	2.59e-07
ENSGALG00000019077		52.6619	0.604062	0.37752	0.00789697	0.0222955
ENSGALG00000037326	MAP3K9	526.968	0.604147	0.182288	6.17e-05	0.000292426
ENSGALG00000051625		206.948	0.605159	0.204845	0.000215556	0.000911107
ENSGALG00000002180	CHFR	2807.24	0.605247	0.0603278	5.95e-25	2.71e-23
ENSGALG00000006710	RAB36	332.687	0.605588	0.180297	5.2e-05	0.000249606
ENSGALG00000009510	PIGH	276.574	0.606475	0.178648	4.52e-05	0.000219457
ENSGALG00000002002	BCAS2	2236.41	0.606772	0.086822	1.55e-13	2.52e-12
ENSGALG00000008627	TTBK1	154.154	0.608241	0.259786	0.00136636	0.00476114
ENSGALG00000012392	IYD	24.9418	0.608467	0.817651	0.0069575	0.0200077
ENSGALG00000043381		25558.6	0.608955	0.0787174	5.57e-16	1.2e-14
ENSGALG00000006342	UEVLD	1814.61	0.609134	0.161561	1.03e-05	5.7e-05
ENSGALG00000007389	ANKRD40	737.614	0.609175	0.129092	1.41e-07	1.1e-06
ENSGALG00000035994		1160.09	0.609257	0.0879223	2.33e-13	3.71e-12
ENSGALG00000012128	IMMP1L	678.483	0.609949	0.123487	4.59e-08	3.89e-07
ENSGALG00000047647	PRSS3	94.3098	0.610132	0.284834	0.00229471	0.00752105
ENSGALG00000047304		20.6494	0.61031	0.409028	0.00923095	0.0255722
ENSGALG00000004878		394.693	0.610834	0.186803	6.98e-05	0.000327394
ENSGALG00000027716		105.099	0.611186	0.234989	0.000637821	0.00241987
ENSGALG00000007009	NCOA5	2447.81	0.611441	0.0545586	1.93e-30	1.21e-28
ENSGALG00000008459	BMPR2	635.064	0.612192	0.179127	4.02e-05	0.000196944
ENSGALG00000002771	CRIP1	9.54903	0.613097	0.563674	0.0133179	0.0351062
ENSGALG00000011544	BCL2L14	24.8858	0.613362	0.459515	0.0113614	0.0307035
ENSGALG00000006929	ZNF711	3188.76	0.613399	0.135955	3.76e-07	2.72e-06
ENSGALG00000019397	CERK	2789.83	0.613554	0.0555541	1.18e-29	7.04e-28
ENSGALG00000012595	AGTPBP1	15.5521	0.613586	0.560241	0.013284	0.035035
ENSGALG00000000318	CSRP1	23599	0.614085	0.0996171	3.84e-11	4.84e-10
ENSGALG00000012207	CCNT2	1018.98	0.614092	0.152264	3.31e-06	2e-05
ENSGALG00000002043		1981.27	0.614408	0.0838035	1.2e-14	2.2e-13
ENSGALG00000010337	GPR149	19.1481	0.614917	0.441337	0.0104563	0.0285571
ENSGALG00000015414	NSUN3	194.375	0.615162	0.163003	9.77e-06	5.45e-05
ENSGALG00000005198	RPS6KB1	4088.72	0.615242	0.100804	5.61e-11	6.95e-10
ENSGALG00000012802	F13A1	359.884	0.617139	0.348068	0.00525684	0.0156751
ENSGALG00000003636	FBLIM1	340.345	0.618103	0.161644	7.82e-06	4.45e-05
ENSGALG00000030510		63.7295	0.618326	0.315211	0.00343003	0.010733
ENSGALG00000009705	RYR3	21.1112	0.619721	0.669759	0.0110874	0.0300476
ENSGALG00000023909		17.6082	0.619833	0.528596	0.0125857	0.0334752
ENSGALG00000007252	ANKDD1A	14.2246	0.619951	0.594579	0.0125892	0.0334787
ENSGALG00000023303	SIX2	2389.74	0.61998	0.105543	2.24e-10	2.6e-09
ENSGALG00000049792		277.37	0.620127	0.217269	0.000275974	0.00113734
ENSGALG00000029301	BMP2	2134.27	0.620622	0.0649861	6.29e-23	2.42e-21
ENSGALG00000005464		6776.45	0.622153	0.082408	2.16e-15	4.36e-14
ENSGALG00000049882	SMPDL3A	1781.24	0.622854	0.0837634	5.13e-15	9.87e-14
ENSGALG00000040070	PDIA2	84.6768	0.623935	0.300617	0.00253462	0.00821261
ENSGALG00000009995	AKAP6	449.078	0.625371	0.184658	4.19e-05	0.00020454
ENSGALG00000004901	CORO1C	15589.4	0.625449	0.102413	5.11e-11	6.37e-10
ENSGALG00000050454		20.5093	0.62549	0.462912	0.0104499	0.0285468
ENSGALG00000029197	KIRREL3	237.617	0.625543	0.299516	0.0024349	0.00793308
ENSGALG00000003990		425.606	0.625711	0.159408	4.89e-06	2.88e-05
ENSGALG00000012709	ATXN1	731.69	0.626245	0.155064	3e-06	1.83e-05
ENSGALG00000035219	ALB	32.2944	0.626469	0.379635	0.00643581	0.0186932
ENSGALG00000033297		23.4511	0.626987	0.608516	0.0119471	0.0320212
ENSGALG00000050887	CACNB3	321.969	0.626994	0.224953	0.000330183	0.00133421
ENSGALG00000032658	FMNL1	16.203	0.627184	0.542184	0.0121327	0.0324506
ENSGALG00000011922	PCNX4	385.382	0.627912	0.141975	5.25e-07	3.68e-06
ENSGALG00000016094	SFXN5	182.007	0.628771	0.173449	1.64e-05	8.76e-05
ENSGALG00000023454	C9ORF152	26.8804	0.629138	0.537004	0.0119315	0.0319848
ENSGALG00000013342	GBX2	363.796	0.629468	0.162307	5.84e-06	3.4e-05
ENSGALG00000012909	C5orf22	316.849	0.629751	0.182419	3.19e-05	0.000159233
ENSGALG00000031832	IKBKB	5201.86	0.629882	0.139019	3.1e-07	2.28e-06
ENSGALG00000047356	VASN	9843.15	0.630111	0.0917725	3.15e-13	4.97e-12
ENSGALG00000041054		1453.68	0.630117	0.0780292	3.12e-17	7.45e-16
ENSGALG00000012588	KIF27	112.194	0.630174	0.267318	0.001171	0.00415497
ENSGALG00000007677	THNSL1	561.119	0.630383	0.160407	4.67e-06	2.76e-05
ENSGALG00000040185		107.135	0.630402	0.259557	0.000957038	0.00347127
ENSGALG00000048236		1022.11	0.630438	0.133969	1.32e-07	1.03e-06
ENSGALG00000047559	DENND2B	4097.87	0.630561	0.0640382	3.19e-24	1.37e-22
ENSGALG00000035726	FLT3	9.14491	0.630941	0.717411	0.00930995	0.0257585
ENSGALG00000053621		64.2997	0.631057	0.284889	0.00171349	0.00579565
ENSGALG00000026098	IL8	1210.92	0.631209	0.100718	1.77e-11	2.32e-10
ENSGALG00000004236	TRAF3IP1	1400.28	0.631345	0.0804864	2.01e-16	4.45e-15
ENSGALG00000041417	ACADSB	1469.96	0.631427	0.0711156	3.06e-20	9.58e-19
ENSGALG00000032534		404.477	0.631561	0.256212	0.000857769	0.00314543
ENSGALG00000040051		155.366	0.631603	0.247993	0.000675172	0.00254521
ENSGALG00000024507	gga-mir-22	55.9855	0.631851	0.282973	0.00162848	0.00553619
ENSGALG00000033148		281.176	0.6322	0.20079	9.57e-05	0.000436931
ENSGALG00000014841	HDDC2	2281.99	0.63248	0.0959121	2.02e-12	2.93e-11
ENSGALG00000049887		11.9501	0.632687	0.586424	0.0117792	0.0316579
ENSGALG00000038504	MID1	61.5776	0.633865	0.40849	0.00742948	0.0211587
ENSGALG00000047031		2666.29	0.634221	0.0978822	4.32e-12	6.04e-11
ENSGALG00000034174		661.673	0.634258	0.210659	0.000152432	0.00066671
ENSGALG00000010244	AKR1A1	2992.26	0.634441	0.131617	7.24e-08	5.93e-07
ENSGALG00000011177		182.871	0.635541	0.236385	0.000431022	0.00170048
ENSGALG00000048151		17.5886	0.635856	0.539404	0.0114448	0.0308798
ENSGALG00000002960	HMGCS2	24.4133	0.637647	0.527133	0.0111545	0.0302242
ENSGALG00000000713	ZFHX3	2002.18	0.637745	0.115002	1.4e-09	1.44e-08
ENSGALG00000029333		1415.57	0.638218	0.144266	4.91e-07	3.47e-06
ENSGALG00000006050	CYP2R1	1368.77	0.638642	0.0819434	2.87e-16	6.28e-15
ENSGALG00000012256	UTRN	2693.1	0.638838	0.154914	1.92e-06	1.22e-05
ENSGALG00000010485	ALKBH1	906.507	0.639267	0.0940769	4.87e-13	7.52e-12
ENSGALG00000050651		155.401	0.639908	0.266265	0.000982349	0.00355971
ENSGALG00000038580		3.2485	0.64038	1.02115	0.00260124	0.00840362
ENSGALG00000011111	PGBD5	228.621	0.640551	0.206965	0.000110552	0.000497875
ENSGALG00000025862	TMEM26	2567.6	0.640775	0.0910152	8.49e-14	1.42e-12
ENSGALG00000004004	PHKB	1156.08	0.641819	0.133509	7.41e-08	6.05e-07
ENSGALG00000001021	MYOCD	62.2678	0.641916	0.428099	0.00779089	0.0220407
ENSGALG00000034511		185.482	0.642062	0.182791	2.37e-05	0.000122185
ENSGALG00000036743	MGAT3	2289.22	0.64209	0.0737075	1.27e-19	3.83e-18
ENSGALG00000034111	FOXF1	69.4131	0.64224	0.319256	0.00271594	0.00873187
ENSGALG00000034813		1861.09	0.642437	0.203857	8.99e-05	0.000411729
ENSGALG00000015254	ST18	46.8723	0.642448	0.419723	0.00738387	0.0210484
ENSGALG00000003818	CYFIP2	28.3285	0.642586	0.455934	0.00887714	0.0247126
ENSGALG00000048627		2177.46	0.642818	0.168122	6.81e-06	3.92e-05
ENSGALG00000030718		921.027	0.643891	0.102325	1.39e-11	1.83e-10
ENSGALG00000054381	SNORD14	251.162	0.644661	0.185366	2.68e-05	0.000135902
ENSGALG00000013272	PRMT8	532.2	0.644916	0.135578	9.39e-08	7.56e-07
ENSGALG00000015860	UBE3D	108.932	0.645369	0.293238	0.00166194	0.0056387
ENSGALG00000023355	TMEM154	13.8084	0.645973	0.740274	0.00822578	0.0230837
ENSGALG00000001130	GALNT17	11.7015	0.646194	0.742337	0.0081684	0.0229352
ENSGALG00000037314		207.325	0.646768	0.165273	4.58e-06	2.71e-05
ENSGALG00000012795	RIOK1	1855.96	0.647135	0.0987394	2.42e-12	3.47e-11
ENSGALG00000018946	LMOD3	13.3958	0.648132	0.625096	0.0104815	0.0286179
ENSGALG00000010977	FAM221A	114.672	0.648153	0.235845	0.000336245	0.00135549
ENSGALG00000004627		173.426	0.648582	0.245169	0.000461892	0.00180831
ENSGALG00000038207		5921.79	0.648839	0.153992	1.22e-06	8.03e-06
ENSGALG00000037935	RARA	7248.91	0.651026	0.0701385	6.59e-22	2.32e-20
ENSGALG00000054765		5.02591	0.651063	0.573201	0.0105937	0.0288728
ENSGALG00000002356	CMTR2	690.207	0.652214	0.176396	1.09e-05	5.97e-05
ENSGALG00000042903		129.927	0.653315	0.325964	0.00262646	0.00847619
ENSGALG00000026405	gga-mir-6712	5.97443	0.653484	0.59339	0.0104257	0.0285062
ENSGALG00000010225		62.3924	0.653775	0.481444	0.00895137	0.0248921
ENSGALG00000051546		205.842	0.654153	0.171999	6.98e-06	4.01e-05
ENSGALG00000001729	CD276	2054.36	0.654188	0.122269	3.84e-09	3.76e-08
ENSGALG00000051947	OPA3	740.395	0.654331	0.154649	1.09e-06	7.24e-06
ENSGALG00000005474	PNAT10	199.263	0.655726	0.202967	6.34e-05	0.000299436
ENSGALG00000053914	SLC16A13	16.0546	0.65601	0.679925	0.00921939	0.0255571
ENSGALG00000045729	HHIPL2	70.283	0.65603	0.322099	0.00239765	0.00782668
ENSGALG00000016228	NYX	79.6936	0.656049	0.267939	0.000800246	0.00295569
ENSGALG00000037727	OSGEPL1	415.1	0.656273	0.123332	4.47e-09	4.33e-08
ENSGALG00000004777	AIFM2	460.372	0.656451	0.134997	5.15e-08	4.32e-07
ENSGALG00000006157	INTS6L	2521.86	0.656546	0.140526	1.34e-07	1.05e-06
ENSGALG00000011687		27.2758	0.656594	0.44389	0.00748285	0.0212751
ENSGALG00000054227		92.0315	0.657574	0.264562	0.000713902	0.00267045
ENSGALG00000036970		108.748	0.657751	0.312992	0.00202602	0.00672664
ENSGALG00000003521	TPM1	37531.4	0.658265	0.0419585	6.54e-57	1.29e-54
ENSGALG00000002240	C3orf18	496.164	0.658311	0.117044	7.85e-10	8.33e-09
ENSGALG00000009836	ELMOD2	1346.91	0.658466	0.128704	1.35e-08	1.24e-07
ENSGALG00000015807	RWDD2B	497.062	0.658559	0.115938	5.65e-10	6.14e-09
ENSGALG00000030603	ANTXR1	3764.69	0.659778	0.129157	1.4e-08	1.28e-07
ENSGALG00000047143		736.381	0.659813	0.186287	1.93e-05	0.000101642
ENSGALG00000030941	KIAA1324	388.926	0.659993	0.186664	1.98e-05	0.000103921
ENSGALG00000010915	IL6	4257.67	0.66081	0.0675799	5.18e-24	2.2e-22
ENSGALG00000015333	PCGF3	340.821	0.661273	0.187627	2.06e-05	0.000107323
ENSGALG00000001256	NLRC5	1587.23	0.661531	0.179873	1.12e-05	6.16e-05
ENSGALG00000026055	PALM	137.517	0.662445	0.221883	0.00014453	0.000635955
ENSGALG00000049733		593.849	0.662504	0.158388	1.3e-06	8.55e-06
ENSGALG00000001889	CARD9	215.595	0.662634	0.250575	0.000433732	0.00170987
ENSGALG00000005473	PNAT3	281.424	0.663292	0.151944	5.64e-07	3.94e-06
ENSGALG00000002551	CFAP70	70.3875	0.663764	0.423584	0.00626391	0.0182631
ENSGALG00000037665	LMBR1L	239.11	0.663806	0.23515	0.000245945	0.00102546
ENSGALG00000041563	UNC80	17.2386	0.663983	0.520703	0.00922143	0.0255571
ENSGALG00000002397	PSPH	42.5309	0.664959	0.332648	0.00252257	0.00818207
ENSGALG00000048850		18.0477	0.666972	0.68467	0.00869299	0.0242528
ENSGALG00000009069	CAPN14	13.7988	0.667006	0.694665	0.00851306	0.0237949
ENSGALG00000054330		634.122	0.667049	0.116124	3.69e-10	4.15e-09
ENSGALG00000014386	SEPSECS	1163.88	0.667053	0.101695	2.09e-12	3.02e-11
ENSGALG00000034022		123.686	0.667861	0.321023	0.00204042	0.00676568
ENSGALG00000002024	COMT	174.531	0.668517	0.184378	1.33e-05	7.22e-05
ENSGALG00000008085	NEFH	92.1386	0.668892	0.289479	0.00111152	0.00397983
ENSGALG00000012236	DMC1	91.9568	0.670673	0.18506	1.33e-05	7.2e-05
ENSGALG00000017011	TRIM13	618.152	0.671265	0.122422	1.66e-09	1.7e-08
ENSGALG00000013268		72.3019	0.67135	0.30417	0.0014518	0.0050235
ENSGALG00000039120	NBEAL2	3613.32	0.672567	0.114406	1.6e-10	1.89e-09
ENSGALG00000007220	FTH1	84435.2	0.672641	0.104901	5.42e-12	7.48e-11
ENSGALG00000036128	ZNF407	552.115	0.673177	0.158707	9.49e-07	6.36e-06
ENSGALG00000013887	FAM210A	1282.93	0.673642	0.0898959	2.43e-15	4.85e-14
ENSGALG00000032142	MT-CO1	1.16417e+06	0.673809	0.252416	0.000381763	0.00152061
ENSGALG00000006422		1196.66	0.674212	0.0886381	1.02e-15	2.13e-14
ENSGALG00000014723	GABARAPL1	4612.69	0.674438	0.0608091	4.7e-30	2.86e-28
ENSGALG00000007539	ANKRD2	88.3139	0.675365	0.260229	0.000475576	0.0018577
ENSGALG00000046687	EPS8L3	334.685	0.6755	0.185288	1.19e-05	6.51e-05
ENSGALG00000012978	CDYL2	249.424	0.675692	0.264425	0.000535373	0.00206438
ENSGALG00000053608		793.172	0.676544	0.190968	1.78e-05	9.43e-05
ENSGALG00000034140	ZNF395	809.205	0.676988	0.115345	1.66e-10	1.95e-09
ENSGALG00000003930	APBA2	398.986	0.678072	0.156056	5.77e-07	4.03e-06
ENSGALG00000035685		1193.22	0.678708	0.214049	7.05e-05	0.000330719
ENSGALG00000014954	ZNF518B	1447.57	0.678927	0.129493	6.13e-09	5.85e-08
ENSGALG00000026600	C1orf198	329.447	0.680345	0.196562	2.4e-05	0.000123265
ENSGALG00000041834	AEBP1	14115.6	0.680564	0.0623491	3.21e-29	1.86e-27
ENSGALG00000007645		171.769	0.680671	0.193951	1.99e-05	0.000104257
ENSGALG00000004297	DNAH1	154.843	0.681416	0.274198	0.000642132	0.00243502
ENSGALG00000052162	PPM1L	147.342	0.682815	0.206803	4.31e-05	0.000210076
ENSGALG00000007240	TRAIL-LIKE	90.6853	0.683542	0.401885	0.00446228	0.0135431
ENSGALG00000043885	CFAP45	61.4461	0.683759	0.324926	0.0017913	0.00602958
ENSGALG00000016042	CHAF1B	2670.37	0.684163	0.0844205	1.8e-17	4.38e-16
ENSGALG00000035580	MPP2	122.327	0.684384	0.215218	6.66e-05	0.000313578
ENSGALG00000037666		19.9413	0.684713	0.44776	0.00604123	0.0176946
ENSGALG00000013754	PLAGL1	70.3566	0.684842	0.378425	0.00354802	0.0110459
ENSGALG00000031266		81.11	0.685419	0.294493	0.000987	0.00357319
ENSGALG00000043935	AFF1	2119.64	0.685722	0.117794	2.12e-10	2.47e-09
ENSGALG00000012530	FOXRED2	1328.03	0.686078	0.0908649	1.48e-15	3.04e-14
ENSGALG00000011464	EIF5	19531	0.686246	0.0585236	2.99e-33	2.22e-31
ENSGALG00000041030	PCBP2	17001.3	0.686548	0.081119	8.64e-19	2.43e-17
ENSGALG00000043128	ARHGEF10L	3705.51	0.686782	0.109381	1.21e-11	1.61e-10
ENSGALG00000054453		112.509	0.687277	0.333536	0.00196741	0.00655192
ENSGALG00000033408	ZBTB7C	118.842	0.687608	0.21925	7.66e-05	0.000356495
ENSGALG00000053886		50.1733	0.688536	0.333256	0.00193027	0.0064408
ENSGALG00000005232	USP54	1092.72	0.688732	0.101329	3.68e-13	5.78e-12
ENSGALG00000006385	UBXN7	436.002	0.689731	0.164212	1.06e-06	7.04e-06
ENSGALG00000024890	SNORD101	9.53055	0.690108	0.50677	0.00740719	0.0211031
ENSGALG00000015598	RASGRF2	137.075	0.690275	0.307373	0.00120668	0.00427071
ENSGALG00000043903		599.255	0.69033	0.238725	0.000174488	0.000753724
ENSGALG00000036547		204.573	0.690741	0.263365	0.000409166	0.00162008
ENSGALG00000011356		164.483	0.691564	0.277051	0.000595137	0.00227141
ENSGALG00000037611		837.362	0.691579	0.158909	5.26e-07	3.69e-06
ENSGALG00000035502	ZBTB39	756.254	0.69206	0.155852	3.47e-07	2.52e-06
ENSGALG00000049484		2251.18	0.692642	0.0707091	3.72e-24	1.59e-22
ENSGALG00000005147	AMY1A	111.943	0.692995	0.373932	0.00311423	0.00986152
ENSGALG00000004081	TMCO4	552.355	0.693763	0.145446	6.89e-08	5.67e-07
ENSGALG00000004613	P2RX5	684.003	0.694416	0.26683	0.000428439	0.00169072
ENSGALG00000011296		60.762	0.694676	0.323163	0.00152319	0.0052269
ENSGALG00000054272		17.3195	0.694976	0.574411	0.00811294	0.0228087
ENSGALG00000051214		99.2893	0.695768	0.32204	0.00147425	0.00508628
ENSGALG00000019215	ARL6	218.864	0.696178	0.211288	4.17e-05	0.000204059
ENSGALG00000052641	PLD6	57.7519	0.69795	0.300247	0.000943019	0.00342853
ENSGALG00000007717	GCNT7	65.0284	0.698513	0.377634	0.00306372	0.00971963
ENSGALG00000007267	MVD	2912.12	0.698906	0.0958589	1e-14	1.86e-13
ENSGALG00000051796		32.3124	0.699144	0.476709	0.006203	0.018113
ENSGALG00000014687	EPHA1	24.4836	0.699391	0.558951	0.00776317	0.0219744
ENSGALG00000009684	GPR26	9.07303	0.699455	1.0153	0.00262083	0.00846158
ENSGALG00000009381	SIPA1L1	4354.21	0.699609	0.0591038	7.56e-34	5.77e-32
ENSGALG00000007909	IQCH	108.805	0.699931	0.279439	0.000560178	0.00215083
ENSGALG00000026159	PDLIM7	9054.49	0.700418	0.0860132	1.22e-17	3.03e-16
ENSGALG00000010005	EPAS1	1095.57	0.700977	0.138924	1.61e-08	1.46e-07
ENSGALG00000028567	MYL9	31207.2	0.70106	0.111278	9.92e-12	1.34e-10
ENSGALG00000050539		268.423	0.701759	0.169847	1.37e-06	8.93e-06
ENSGALG00000032723	ANKRD13B	1039.93	0.701888	0.162725	6.02e-07	4.18e-06
ENSGALG00000051564		738.068	0.701998	0.0764189	1.25e-21	4.35e-20
ENSGALG00000013971	SGK1	6725.05	0.702719	0.0786481	1.26e-20	4.06e-19
ENSGALG00000040023	MAPK11	42.5938	0.704598	0.385343	0.00312418	0.0098869
ENSGALG00000053457	PCDHGC5	303.638	0.704827	0.154243	1.77e-07	1.36e-06
ENSGALG00000001153	AUTS2	264.301	0.704849	0.152203	1.31e-07	1.03e-06
ENSGALG00000038243		299.452	0.705048	0.256016	0.000256266	0.00106643
ENSGALG00000039754		71.9607	0.70529	0.3249	0.00137902	0.0048009
ENSGALG00000006043	RBBP6	7586.54	0.705486	0.11762	6.63e-11	8.13e-10
ENSGALG00000037811	NRSN1	5944.85	0.705547	0.076956	1.46e-21	5.05e-20
ENSGALG00000052849		62.7526	0.705903	0.393098	0.00333061	0.0104625
ENSGALG00000032584	ALX4	526.877	0.708962	0.2161	4.17e-05	0.000204022
ENSGALG00000003131	DGKE	382.409	0.709586	0.18711	5.68e-06	3.31e-05
ENSGALG00000033660	PRDM10	1600.6	0.709713	0.148931	6.61e-08	5.46e-07
ENSGALG00000054542		884.423	0.7099	0.124168	3.58e-10	4.03e-09
ENSGALG00000035447		3964.21	0.710086	0.0574761	1.33e-36	1.16e-34
ENSGALG00000002637	RBP7	26.5434	0.71081	0.453421	0.00502252	0.0150587
ENSGALG00000009476	CDK6	12235	0.711781	0.0840136	7.25e-19	2.05e-17
ENSGALG00000005696	ABHD6	949.968	0.712088	0.10369	2.05e-13	3.29e-12
ENSGALG00000039924		463.077	0.712943	0.172056	1.24e-06	8.17e-06
ENSGALG00000011096	ABCB10	231.452	0.712981	0.218772	4.44e-05	0.000215793
ENSGALG00000007119	DAGLB	665.783	0.71316	0.156904	1.93e-07	1.47e-06
ENSGALG00000052838		975.42	0.713351	0.12118	1.28e-10	1.53e-09
ENSGALG00000009626	THBS1	160872	0.713677	0.065944	7.79e-29	4.43e-27
ENSGALG00000003120	NCOR2	15069.8	0.713935	0.0934733	6.73e-16	1.43e-14
ENSGALG00000048432		2.05684	0.714376	0.957948	0.0032517	0.0102439
ENSGALG00000035800	CAMKMT	291.055	0.715728	0.169311	8.45e-07	5.71e-06
ENSGALG00000014615	LAMA1	2972.12	0.715922	0.129849	1.15e-09	1.2e-08
ENSGALG00000045036		178.416	0.71593	0.237548	0.000104229	0.000471541
ENSGALG00000033631	MYC	5867.19	0.716437	0.0682985	2.77e-27	1.43e-25
ENSGALG00000002016	PRKCD	946.978	0.716543	0.0701789	5.15e-26	2.48e-24
ENSGALG00000006198	LSS	9574.71	0.717219	0.0659983	4.72e-29	2.72e-27
ENSGALG00000040267	IVD	520.879	0.717304	0.146219	3.14e-08	2.73e-07
ENSGALG00000031340	E2F7	630.607	0.717922	0.160585	2.71e-07	2.01e-06
ENSGALG00000005964		665.721	0.718619	0.117382	2.91e-11	3.74e-10
ENSGALG00000011708	MYLK	1211.86	0.719332	0.157043	1.59e-07	1.23e-06
ENSGALG00000006376	TMC3	1672.06	0.719617	0.179036	2.09e-06	1.32e-05
ENSGALG00000049401		112.963	0.719651	0.271282	0.00033139	0.00133839
ENSGALG00000015257	GIN1	69.1133	0.719702	0.317737	0.00101343	0.00366282
ENSGALG00000021592	TLCD2	1029.54	0.721806	0.116252	1.66e-11	2.17e-10
ENSGALG00000033063	GINS2	638.748	0.721917	0.127448	4.69e-10	5.17e-09
ENSGALG00000051995		11.6551	0.722341	0.800082	0.00531839	0.0158344
ENSGALG00000004442	PPA1	3939.15	0.722985	0.0838959	1.98e-19	5.87e-18
ENSGALG00000015110	FAM189A2	250.871	0.723352	0.174335	1.17e-06	7.69e-06
ENSGALG00000017850		95.0488	0.723646	0.266689	0.00027025	0.00111675
ENSGALG00000025672	SNORD97	142.245	0.724939	0.239426	9.59e-05	0.000437878
ENSGALG00000009241	SFRP2	10.1265	0.726909	0.834568	0.00476582	0.0143762
ENSGALG00000039864		1590.22	0.727563	0.166144	4.03e-07	2.89e-06
ENSGALG00000001718	CCNG1	1385.63	0.727582	0.068859	1.19e-27	6.41e-26
ENSGALG00000009501	TMA16	2548.43	0.728517	0.0882547	4.38e-18	1.15e-16
ENSGALG00000021931	SNORA73	178.649	0.729007	0.255755	0.000170895	0.000739868
ENSGALG00000032456	COII	434123	0.729036	0.252811	0.000153219	0.000669962
ENSGALG00000007652	SUCLG2	1401.29	0.729473	0.11595	9.52e-12	1.29e-10
ENSGALG00000027232	C1QTNF2	8.26522	0.72997	0.809312	0.00505876	0.0151467
ENSGALG00000047425		18.1877	0.730966	0.389856	0.00252306	0.00818207
ENSGALG00000007557	RUBCN	1103.28	0.732336	0.100073	7.31e-15	1.38e-13
ENSGALG00000001883	ST6GALNAC2	31.9929	0.733105	0.428293	0.00350691	0.0109357
ENSGALG00000008438	SLC35C1	1423.97	0.733769	0.0978191	1.82e-15	3.71e-14
ENSGALG00000042928		130.515	0.734535	0.214582	2.23e-05	0.000115355
ENSGALG00000032419	STARD8	44.7894	0.734546	0.315141	0.000798821	0.00295114
ENSGALG00000035334	COX3	437907	0.735072	0.252903	0.00013891	0.000613162
ENSGALG00000046850		16.8679	0.735489	0.455709	0.00415238	0.0127234
ENSGALG00000053281	PKIA	945.933	0.735781	0.134704	1.45e-09	1.49e-08
ENSGALG00000001849	BSN	300.693	0.736066	0.171315	5.73e-07	4e-06
ENSGALG00000043775	RAPGEF3	44.2479	0.737205	0.428292	0.00338189	0.0105975
ENSGALG00000039391	ZC3H12B	227.838	0.737613	0.177833	1.12e-06	7.38e-06
ENSGALG00000003099	PCTP	24.057	0.737961	0.447324	0.00385523	0.0118913
ENSGALG00000028354	METRNL	493.583	0.73855	0.163116	1.92e-07	1.47e-06
ENSGALG00000001925	GNB1L	518.184	0.738555	0.136942	2.12e-09	2.14e-08
ENSGALG00000015916	SLC17A5	987.098	0.738677	0.102644	1.77e-14	3.2e-13
ENSGALG00000054600		2227.04	0.741288	0.149858	2.35e-08	2.09e-07
ENSGALG00000005853	HTR2C	37.4245	0.741573	0.433239	0.00338083	0.0105964
ENSGALG00000050116		23.9588	0.741702	0.452585	0.0038672	0.0119186
ENSGALG00000041161	NT5DC4	183.847	0.742582	0.231123	4.7e-05	0.000227576
ENSGALG00000012260	LCT	119.095	0.742646	0.229454	4.31e-05	0.000210076
ENSGALG00000051055	MAPK8IP2	1424.69	0.742749	0.0937129	6.33e-17	1.46e-15
ENSGALG00000026385	LYPLAL1	636.324	0.742767	0.136576	1.62e-09	1.66e-08
ENSGALG00000054844		131.15	0.743005	0.209695	1.36e-05	7.36e-05
ENSGALG00000048534		2388.77	0.743914	0.0668223	2.33e-30	1.45e-28
ENSGALG00000026153	FOXO6	235.054	0.744013	0.256897	0.000139095	0.000613628
ENSGALG00000052600		19.15	0.744049	0.393599	0.00230965	0.00756519
ENSGALG00000008185	AOX1	21.3834	0.744308	0.526145	0.00534379	0.015898
ENSGALG00000021553	B3GNTL	5.18348	0.744347	0.917437	0.00353479	0.0110114
ENSGALG00000017005	CAB39L	2796.36	0.744547	0.189361	2.79e-06	1.72e-05
ENSGALG00000035438		1437.53	0.744702	0.0863774	1.82e-19	5.41e-18
ENSGALG00000015490	FBXL4	155.175	0.744898	0.244557	8.38e-05	0.000386491
ENSGALG00000053625	STAC3	61.2149	0.746657	0.311146	0.000629354	0.00239308
ENSGALG00000037587	ENPP3	3313.86	0.747138	0.119197	1.05e-11	1.41e-10
ENSGALG00000001962	PTBP1	13830.9	0.747193	0.0591018	3.26e-38	3.15e-36
ENSGALG00000048315		1309.86	0.748084	0.15845	7.24e-08	5.93e-07
ENSGALG00000014038	CDC123	460.092	0.748132	0.113623	1.3e-12	1.93e-11
ENSGALG00000053385		34.5615	0.749128	0.375648	0.00178459	0.00600962
ENSGALG00000041091	ATP6	485906	0.749436	0.260602	0.00014584	0.000640803
ENSGALG00000002881	C26H6ORF125	1420.98	0.749606	0.0925216	1.49e-17	3.65e-16
ENSGALG00000051379		127.622	0.749961	0.271646	0.000210836	0.000893126
ENSGALG00000053116	LRRC61	73.9925	0.750664	0.332908	0.000921652	0.00335641
ENSGALG00000042265		109.238	0.751958	0.268679	0.000185504	0.000796151
ENSGALG00000014213	PRR5	2238.33	0.752048	0.0949401	6.45e-17	1.49e-15
ENSGALG00000002347	DIPK2A	3738.48	0.752071	0.089695	1.38e-18	3.82e-17
ENSGALG00000008380	DGKZ	4216.84	0.752351	0.0954683	8.94e-17	2.05e-15
ENSGALG00000050998		44.9269	0.752956	0.360674	0.00140317	0.00487392
ENSGALG00000037257	HLX	218.371	0.753732	0.225675	2.85e-05	0.000143657
ENSGALG00000010303		329.716	0.75407	0.203068	6.69e-06	3.86e-05
ENSGALG00000016739	HERC2	4115.71	0.754328	0.148874	1.2e-08	1.11e-07
ENSGALG00000049728		41.4271	0.755633	0.400747	0.00222603	0.00731786
ENSGALG00000003026		968.825	0.756912	0.182599	1.06e-06	7.05e-06
ENSGALG00000039051	HOXC6	586.976	0.756936	0.133903	4.55e-10	5.02e-09
ENSGALG00000051862		238.369	0.7577	0.22569	2.63e-05	0.000133857
ENSGALG00000054469	DISP1	2907.7	0.758443	0.0743051	4.88e-26	2.36e-24
ENSGALG00000028612		41.5447	0.758469	0.584719	0.00554938	0.0164455
ENSGALG00000040313		28.0892	0.759484	0.394177	0.00199963	0.0066491
ENSGALG00000047752		2.21631	0.759529	1.11803	0.00164714	0.00559218
ENSGALG00000009621	ACTB	544981	0.759809	0.0988548	4.13e-16	8.95e-15
ENSGALG00000005331	GJC2	545.466	0.759949	0.144981	4.63e-09	4.48e-08
ENSGALG00000005204		929.416	0.760951	0.101141	1.45e-15	2.99e-14
ENSGALG00000049164		998.833	0.760997	0.19591	3.24e-06	1.96e-05
ENSGALG00000032465	ATP8	71460.2	0.761132	0.268168	0.000158109	0.000688792
ENSGALG00000026383	TMSB4X	79229.1	0.762083	0.0705835	9.37e-29	5.28e-27
ENSGALG00000042375		754.683	0.762084	0.145014	4.28e-09	4.15e-08
ENSGALG00000014646	SYT11	1778.51	0.762445	0.102508	2.78e-15	5.51e-14
ENSGALG00000021135	HAPLN3	171.169	0.762612	0.28595	0.000270034	0.00111615
ENSGALG00000038710	MANSC1	415.248	0.762852	0.144811	3.98e-09	3.89e-08
ENSGALG00000030084	EXOSC7	2480.39	0.762876	0.0925214	4.42e-18	1.16e-16
ENSGALG00000051300		418.702	0.763223	0.269071	0.000157852	0.000688256
ENSGALG00000023089	SSBP2	263.918	0.765017	0.17216	2.65e-07	1.97e-06
ENSGALG00000004244	TTPAL	981.865	0.765243	0.065621	5.24e-33	3.85e-31
ENSGALG00000003923	COL6A3	22424.6	0.76531	0.0979118	1.46e-16	3.28e-15
ENSGALG00000012416		15.4797	0.767148	0.615853	0.00544565	0.0161724
ENSGALG00000011855	RHOJ	510.782	0.768381	0.184003	8.97e-07	6.04e-06
ENSGALG00000025929	HOXA5	719.895	0.769022	0.0851266	4.39e-21	1.49e-19
ENSGALG00000026607		1040.45	0.769221	0.0989841	2.09e-16	4.6e-15
ENSGALG00000042020	CG-16	215.311	0.770494	0.180001	5.57e-07	3.89e-06
ENSGALG00000051022		55.1724	0.771051	0.463965	0.00326729	0.0102888
ENSGALG00000050713		109.834	0.772443	0.383617	0.00155473	0.00531727
ENSGALG00000008538	GINS1	2150.55	0.776285	0.0879823	2.93e-20	9.2e-19
ENSGALG00000050961		8.6426	0.776534	0.850036	0.00391774	0.0120647
ENSGALG00000015346	NFKBIZ	2188.15	0.776677	0.138783	6.07e-10	6.54e-09
ENSGALG00000041988	SIK1	4651.56	0.778303	0.0915124	4.8e-19	1.38e-17
ENSGALG00000032838	BKJ	1961.16	0.778638	0.14308	1.46e-09	1.5e-08
ENSGALG00000030436	ND3	63903.5	0.778813	0.256324	7.66e-05	0.000356495
ENSGALG00000004695	ECM2	1071.48	0.779298	0.0827266	1.18e-22	4.45e-21
ENSGALG00000028568	DNAL1	537.824	0.779882	0.106771	7.43e-15	1.4e-13
ENSGALG00000032405		119.642	0.780223	0.236501	3.04e-05	0.000152432
ENSGALG00000038527	CARMIL3	573.205	0.780358	0.212694	7.39e-06	4.22e-05
ENSGALG00000024758		23.5813	0.781369	0.408694	0.00189429	0.00633453
ENSGALG00000015762	LYRM2	197.071	0.782635	0.229774	2.03e-05	0.000106112
ENSGALG00000052453		46.6996	0.78361	0.326556	0.000549426	0.00211325
ENSGALG00000015795	ADAMTS5	190.646	0.783759	0.198842	2.39e-06	1.49e-05
ENSGALG00000027440	COX20	920.806	0.784087	0.108262	1.17e-14	2.16e-13
ENSGALG00000012697	SLC41A2	714.76	0.786568	0.167546	7.51e-08	6.13e-07
ENSGALG00000013468	TLR3	47.9578	0.788543	0.447536	0.00251692	0.00816735
ENSGALG00000037164	ZFHX4	2042.69	0.788957	0.136991	2.29e-10	2.65e-09
ENSGALG00000039447	KRT23	42.0335	0.789534	0.42393	0.0020415	0.00676781
ENSGALG00000007862	CNTN3	15.8887	0.789775	0.653863	0.00487736	0.0146694
ENSGALG00000013101		55.9025	0.791025	0.412913	0.00180812	0.00607552
ENSGALG00000024964	SNORA53	57.7232	0.792241	0.278246	0.000138376	0.000611159
ENSGALG00000043047	SOBP	621.387	0.79248	0.0914895	1.22e-19	3.67e-18
ENSGALG00000009896	TRERF1	1834.23	0.792971	0.0819583	1.01e-23	4.2e-22
ENSGALG00000001531	FN3K	277.171	0.793382	0.202779	2.63e-06	1.63e-05
ENSGALG00000050127		5787.96	0.793759	0.0699771	2.1e-31	1.41e-29
ENSGALG00000002952	NRG4	232.666	0.795602	0.192686	1.03e-06	6.87e-06
ENSGALG00000009610	PSTK	706.356	0.798038	0.121107	1.17e-12	1.74e-11
ENSGALG00000046379		64.0753	0.798285	0.326799	0.000462245	0.00180923
ENSGALG00000037641		1454.46	0.798738	0.202324	2.24e-06	1.4e-05
ENSGALG00000012275	EPM2A	356.52	0.800543	0.181381	2.81e-07	2.08e-06
ENSGALG00000012913	PKP2	3848.3	0.801991	0.088158	2.43e-21	8.34e-20
ENSGALG00000034713		41.7901	0.802104	0.699595	0.00452993	0.0137294
ENSGALG00000005905	ZDHHC4	168.707	0.802321	0.214443	5.21e-06	3.05e-05
ENSGALG00000053105	RAP1GAP	308.649	0.802498	0.180774	2.48e-07	1.86e-06
ENSGALG00000007431	MAGI1	1424.88	0.80255	0.102108	1.01e-16	2.29e-15
ENSGALG00000037497	CABP2	770.498	0.802575	0.175923	1.39e-07	1.08e-06
ENSGALG00000011677	HSPBAP1	254.809	0.802705	0.194754	1.05e-06	6.96e-06
ENSGALG00000012735	EDN1	1091.64	0.803591	0.120592	7.03e-13	1.08e-11
ENSGALG00000017204	SESN3	391.166	0.803635	0.141363	3.48e-10	3.92e-09
ENSGALG00000016105	DYSF	16963.4	0.803955	0.132511	3.45e-11	4.38e-10
ENSGALG00000002769	DNAJC12	218.511	0.805321	0.15065	2.4e-09	2.41e-08
ENSGALG00000004495		143.856	0.805754	0.297348	0.000204511	0.000868492
ENSGALG00000054766	ITGA2B	149.557	0.806961	0.267091	7.44e-05	0.000346826
ENSGALG00000048462		368.696	0.807924	0.245322	2.86e-05	0.0001444
ENSGALG00000046005		10.2842	0.808278	0.972374	0.0025854	0.00836127
ENSGALG00000030028	MRPS14	1158.5	0.808298	0.113427	2.71e-14	4.79e-13
ENSGALG00000050472		32.3964	0.808343	0.550756	0.00371998	0.0115344
ENSGALG00000047845		206.61	0.808885	0.243956	2.63e-05	0.000133818
ENSGALG00000047047		9.04172	0.808975	0.872742	0.00334932	0.0105126
ENSGALG00000023898		3002.16	0.809128	0.110975	8.07e-15	1.52e-13
ENSGALG00000044313		340.897	0.809624	0.183844	2.89e-07	2.13e-06
ENSGALG00000052619		690.393	0.80982	0.193909	8.12e-07	5.5e-06
ENSGALG00000038260	PTCD2	681.743	0.81142	0.112779	1.64e-14	2.98e-13
ENSGALG00000039978	SLC4A1	34.5558	0.811429	0.545365	0.00357828	0.011131
ENSGALG00000053933		13.2993	0.814044	0.668212	0.00429682	0.0131136
ENSGALG00000001207	PLCH2	82.5369	0.815075	0.343282	0.000528006	0.00203853
ENSGALG00000043734	LIPG	19729.2	0.815804	0.0664538	3.25e-36	2.82e-34
ENSGALG00000053921		35.7704	0.816079	0.425348	0.00163013	0.00553935
ENSGALG00000043569	NME5	115.095	0.81608	0.3171	0.000298383	0.00121791
ENSGALG00000002123	OSCP1	2297.9	0.818356	0.144301	3.72e-10	4.16e-09
ENSGALG00000020745	RHO	10.3242	0.819302	0.931327	0.00281649	0.00901549
ENSGALG00000052932	SHROOM3	271.898	0.819663	0.218424	4.78e-06	2.82e-05
ENSGALG00000001768	TENM2	1077.05	0.81983	0.115359	3.11e-14	5.48e-13
ENSGALG00000010943		276.217	0.820777	0.249482	2.8e-05	0.000141555
ENSGALG00000043768	MT-ND2	222820	0.821636	0.277291	8.66e-05	0.000398024
ENSGALG00000027096	LGALSL	895.159	0.821992	0.0992222	3.13e-18	8.35e-17
ENSGALG00000009982	ZNF827	433.321	0.822284	0.230254	9.73e-06	5.43e-05
ENSGALG00000006751	THY1	31528.9	0.824919	0.102615	2.39e-17	5.76e-16
ENSGALG00000010175	HSP90AB1	9336.52	0.825239	0.119734	1.44e-13	2.35e-12
ENSGALG00000051044		890.888	0.825693	0.143462	2.25e-10	2.61e-09
ENSGALG00000011524	PPEF2	37.8915	0.825695	0.353901	0.000569634	0.00218331
ENSGALG00000000309		586.31	0.827311	0.141952	1.46e-10	1.73e-09
ENSGALG00000005533	ZMYM3	2824.7	0.828151	0.155141	2.44e-09	2.44e-08
ENSGALG00000046593		1416.79	0.82863	0.101338	7.71e-18	1.96e-16
ENSGALG00000030647	MFAP2	1726.64	0.828767	0.0766698	8.39e-29	4.75e-27
ENSGALG00000029583	PLBD1	252.965	0.829218	0.165935	1.51e-08	1.38e-07
ENSGALG00000016567	EPHX2	933.157	0.829674	0.1015	7.9e-18	2e-16
ENSGALG00000033270		72.4404	0.829912	0.314749	0.000236609	0.000990003
ENSGALG00000008889	TTC14	1746.07	0.830178	0.184715	1.82e-07	1.4e-06
ENSGALG00000047060		190.812	0.830207	0.22933	7.9e-06	4.48e-05
ENSGALG00000005452	TADA2A	535.138	0.830256	0.144692	2.49e-10	2.86e-09
ENSGALG00000023933	G0S2	8928.21	0.830265	0.0755457	1.16e-29	6.93e-28
ENSGALG00000016590	TLR7	845.004	0.832669	0.0950167	5.06e-20	1.56e-18
ENSGALG00000002514	SFPQ	12406.4	0.835847	0.0450097	1.59e-78	6.08e-76
ENSGALG00000019325		30.0662	0.836829	0.552199	0.00308431	0.00977282
ENSGALG00000012481	TNFAIP6	30062.4	0.838762	0.103852	1.78e-17	4.33e-16
ENSGALG00000013091	EPS8	291.418	0.8394	0.227623	5.93e-06	3.45e-05
ENSGALG00000011446	TNFAIP2	2820.78	0.840214	0.068488	3.75e-36	3.21e-34
ENSGALG00000008587	NDUFAF1	4348.25	0.841082	0.0589736	1.07e-47	1.52e-45
ENSGALG00000002639	TRPC1	946.554	0.841443	0.126884	8.68e-13	1.31e-11
ENSGALG00000044199	CYP2AC7	13.2585	0.843269	0.525527	0.00264327	0.00851967
ENSGALG00000021399		91.6246	0.843547	0.402708	0.000983058	0.00356144
ENSGALG00000006934	PATZ1	241.043	0.844304	0.184773	1.25e-07	9.88e-07
ENSGALG00000007178	FADS2	5915.68	0.844537	0.0884872	3.75e-23	1.48e-21
ENSGALG00000045809		26.4579	0.845209	0.425848	0.00126153	0.00444128
ENSGALG00000005512	KIAA1671	698.718	0.845313	0.115198	5.75e-15	1.1e-13
ENSGALG00000033635	PTGS2	5896.86	0.846548	0.114109	3.14e-15	6.19e-14
ENSGALG00000031862	BCL11B	2015.52	0.846664	0.150863	5.14e-10	5.64e-09
ENSGALG00000013072	AKR1B10	2477.9	0.846812	0.0894965	8.29e-23	3.16e-21
ENSGALG00000038768	FAM20C	250.157	0.848277	0.189978	2.04e-07	1.55e-06
ENSGALG00000040434		1761.43	0.848782	0.0891045	4.51e-23	1.77e-21
ENSGALG00000033271	PFKM	230.603	0.849295	0.429767	0.00126677	0.00445359
ENSGALG00000037975	CA3B	44.8098	0.849903	0.436569	0.0013487	0.00470818
ENSGALG00000002227	DMXL1	813.857	0.850387	0.198838	4.82e-07	3.41e-06
ENSGALG00000054399		24.5523	0.851056	0.551787	0.00279697	0.00896421
ENSGALG00000037238	PCCB	3309.7	0.851971	0.094795	6.94e-21	2.3e-19
ENSGALG00000008940		118.884	0.851986	0.299617	0.000116971	0.000523858
ENSGALG00000029701	INO80D	330.318	0.852198	0.182993	8.14e-08	6.62e-07
ENSGALG00000040194		26.5937	0.85293	0.401456	0.000884729	0.00323578
ENSGALG00000048109		22.1288	0.853312	0.481451	0.00190119	0.00635485
ENSGALG00000028659	BLEC1	5.03486	0.855135	1.20407	0.00113131	0.00403469
ENSGALG00000011497	PECR	34.2968	0.855161	0.433499	0.00124932	0.00440538
ENSGALG00000008218	DDB2	1403.81	0.856615	0.0891437	2.04e-23	8.36e-22
ENSGALG00000030254	METAP1D	156.186	0.857072	0.286678	7.18e-05	0.000335962
ENSGALG00000025999	NDUFA4	10994.6	0.857953	0.104253	5.13e-18	1.33e-16
ENSGALG00000002467	MTSS2	756.559	0.85838	0.12072	3.07e-14	5.42e-13
ENSGALG00000036956		47656.8	0.859595	0.238946	8.09e-06	4.59e-05
ENSGALG00000022622	HOXA4	630.784	0.860032	0.161742	2.68e-09	2.67e-08
ENSGALG00000042073		425.307	0.860669	0.174116	1.94e-08	1.74e-07
ENSGALG00000009733	SHFM1	5687.76	0.860759	0.10543	8.83e-18	2.23e-16
ENSGALG00000049741	SMIM18	201.559	0.860863	0.226082	3.51e-06	2.12e-05
ENSGALG00000003803	DAB2	1568.87	0.861993	0.087163	1.31e-24	5.79e-23
ENSGALG00000046316	CFAP97D1	395.347	0.86288	0.237641	7.06e-06	4.05e-05
ENSGALG00000036711	S100A11	25114.4	0.863336	0.108235	4.11e-17	9.71e-16
ENSGALG00000009641	COL1A2	113224	0.864735	0.0376149	1.86e-118	1.68e-115
ENSGALG00000000920	CGN	555.155	0.864995	0.148292	1.4e-10	1.67e-09
ENSGALG00000046487		1248.62	0.866262	0.0977106	2.13e-20	6.73e-19
ENSGALG00000040424	SCNN1A	36.8766	0.866442	0.395413	0.000716647	0.00267726
ENSGALG00000006966	ZNF518A	499.773	0.867425	0.130321	7.43e-13	1.13e-11
ENSGALG00000052083		18.5455	0.869676	0.713429	0.00324461	0.0102237
ENSGALG00000029766	ITGB5	1272.75	0.870009	0.101029	2.02e-19	5.96e-18
ENSGALG00000006955	CCNJ	158.833	0.871853	0.222182	2.14e-06	1.35e-05
ENSGALG00000007332	PRICKLE2	212.37	0.87187	0.191611	1.33e-07	1.04e-06
ENSGALG00000040529	DLX3	37.0107	0.872526	0.575957	0.00263967	0.00851344
ENSGALG00000040444	SEMA3C	3182.91	0.873006	0.136616	4.35e-12	6.07e-11
ENSGALG00000021443	PANX3	633.059	0.873068	0.185084	5.95e-08	4.94e-07
ENSGALG00000011518	POMGNT2	421.778	0.8734	0.148708	1.1e-10	1.33e-09
ENSGALG00000030416	HOXC5	162.904	0.876251	0.276353	3.71e-05	0.000182879
ENSGALG00000052626		171.359	0.876859	0.219089	1.53e-06	9.89e-06
ENSGALG00000043103	PKNOX2	1610.95	0.877293	0.0744042	1.31e-33	9.96e-32
ENSGALG00000039346	ARHGAP39	793.287	0.877891	0.146793	5.77e-11	7.13e-10
ENSGALG00000007839	NCAM1	34.4269	0.879327	0.548204	0.0022736	0.00745505
ENSGALG00000003461	USP49	1871.26	0.87973	0.129828	3.3e-13	5.19e-12
ENSGALG00000022871	HHLA2	353.336	0.88113	0.125612	6.23e-14	1.06e-12
ENSGALG00000003283		1373.12	0.882015	0.180025	2.39e-08	2.12e-07
ENSGALG00000002142	DGKQ	156.616	0.882192	0.325098	0.000160693	0.000698856
ENSGALG00000010721	GLIS1	59.2494	0.883165	0.333406	0.000194475	0.000830935
ENSGALG00000015271		1312.82	0.883569	0.122414	1.44e-14	2.63e-13
ENSGALG00000031997	SFRP4	265.729	0.883811	0.148291	6.54e-11	8.03e-10
ENSGALG00000003499	MAST3	1979.54	0.883917	0.124826	3.88e-14	6.73e-13
ENSGALG00000001392	MMP23B	2326.34	0.884235	0.123293	2.02e-14	3.62e-13
ENSGALG00000014725	PLK2	20438.6	0.884836	0.0443395	4.37e-90	1.92e-87
ENSGALG00000023844		238.013	0.885272	0.205302	3.93e-07	2.83e-06
ENSGALG00000005958		35.9459	0.88535	0.441235	0.00103851	0.00374464
ENSGALG00000008425	MAP1A	199.253	0.885442	0.227875	2.45e-06	1.53e-05
ENSGALG00000005957		101.36	0.886246	0.337073	0.000204267	0.000867698
ENSGALG00000000162	DMB1	83.0357	0.886601	0.361376	0.000336838	0.00135682
ENSGALG00000034347	KIF21B	41.8823	0.888017	0.344658	0.000236925	0.000990783
ENSGALG00000009292		185.695	0.888791	0.142037	1.03e-11	1.38e-10
ENSGALG00000033303		430.853	0.890684	0.220255	1.26e-06	8.25e-06
ENSGALG00000009864	TRAF5	78.4191	0.89102	0.378848	0.000437186	0.00172125
ENSGALG00000015704	TXN	67957.3	0.891187	0.0590857	6.82e-53	1.17e-50
ENSGALG00000002192	PTPRC	693.673	0.892458	0.119488	2.25e-15	4.52e-14
ENSGALG00000004252		18.6218	0.893607	0.546238	0.00204318	0.00677043
ENSGALG00000016917	CLN5	62.4447	0.893725	0.297008	6.13e-05	0.000290678
ENSGALG00000047535		229.888	0.893768	0.245696	6.48e-06	3.75e-05
ENSGALG00000039741	TNFRSF8	47.0042	0.895145	0.466467	0.0012109	0.00428369
ENSGALG00000006871	SLCO3A1	1568.58	0.896558	0.125415	2.42e-14	4.3e-13
ENSGALG00000054465		13.2279	0.896739	0.819771	0.00268417	0.00863696
ENSGALG00000028998	XPA	3180.58	0.897408	0.063338	4.7e-47	6.56e-45
ENSGALG00000000584		206.449	0.897708	0.222855	1.33e-06	8.69e-06
ENSGALG00000002038	DENND2C	3810.88	0.898142	0.0911843	2.09e-24	9.09e-23
ENSGALG00000045548		3221.75	0.898883	0.130051	1.31e-13	2.15e-12
ENSGALG00000041555	COL1A1	189608	0.9008	0.0858148	2.78e-27	1.43e-25
ENSGALG00000006425	SLC6A6	214.661	0.901382	0.208082	3.53e-07	2.56e-06
ENSGALG00000032370		103.82	0.902089	0.336111	0.000166129	0.000720252
ENSGALG00000050404		22.1376	0.902315	0.560839	0.00205204	0.00679685
ENSGALG00000030011	ZNF704	1291.5	0.903498	0.102847	4.66e-20	1.44e-18
ENSGALG00000022440	EVA1B	220.463	0.904477	0.18126	1.49e-08	1.36e-07
ENSGALG00000052514		205.911	0.906526	0.190491	4.73e-08	3.99e-07
ENSGALG00000051438	EXTL2	230.544	0.908062	0.209278	3.39e-07	2.48e-06
ENSGALG00000007186	TMEM268	502.393	0.908821	0.143621	6.65e-12	9.07e-11
ENSGALG00000012705	GMPR2	66.6075	0.90954	0.475122	0.00115987	0.00412311
ENSGALG00000006297	TRPC7	16.2784	0.909891	0.7681	0.00264813	0.00853174
ENSGALG00000054657		901.354	0.910173	0.124552	7.69e-15	1.45e-13
ENSGALG00000043618	SLC40A1	480.523	0.910929	0.12957	5.74e-14	9.77e-13
ENSGALG00000039238	SALL1	145.677	0.91142	0.243943	4.28e-06	2.55e-05
ENSGALG00000042607	RSPO3	806.724	0.911433	0.158469	2.29e-10	2.65e-09
ENSGALG00000050434		45.9587	0.91172	0.394919	0.000458462	0.00179626
ENSGALG00000008193	RELN	536.745	0.911724	0.124156	5.91e-15	1.13e-13
ENSGALG00000027881		18.5728	0.911924	0.440418	0.000818479	0.00301432
ENSGALG00000000377	HNRNPM	12873.2	0.913351	0.0688871	1.36e-41	1.61e-39
ENSGALG00000037131		4037.25	0.915175	0.110655	3.97e-18	1.04e-16
ENSGALG00000033405	DBN1	121.03	0.915911	0.337326	0.000145666	0.000640382
ENSGALG00000033051	CAMK1D	489.992	0.915993	0.140758	2.08e-12	3.01e-11
ENSGALG00000055035		30.3892	0.916139	0.492721	0.00126421	0.00444763
ENSGALG00000053601	LPXN	94.8066	0.920019	0.287353	3.02e-05	0.000151562
ENSGALG00000011312	OXSM	411.46	0.920789	0.14137	2.01e-12	2.91e-11
ENSGALG00000050916		41.4549	0.921315	0.349275	0.000180329	0.000776986
ENSGALG00000011376	ANKRD9	16.5661	0.922012	0.628312	0.00224213	0.00736603
ENSGALG00000012712	RBM24	49.6651	0.922415	0.370705	0.000274639	0.00113275
ENSGALG00000030613	PDGFRB	386.464	0.922663	0.136564	3.94e-13	6.16e-12
ENSGALG00000052646	EXD3	304.385	0.923402	0.171591	1.87e-09	1.9e-08
ENSGALG00000054634		6485.19	0.924779	0.131305	5.34e-14	9.11e-13
ENSGALG00000028015	HES1	93.9228	0.92626	0.417169	0.000546584	0.00210285
ENSGALG00000028851	RAB8A	39981.3	0.926714	0.0512474	1.6e-74	5.23e-72
ENSGALG00000014236	ATP8A1	77.0233	0.926817	0.352712	0.000182867	0.000785933
ENSGALG00000027925	HOXA3	980.31	0.926963	0.101386	1.92e-21	6.6e-20
ENSGALG00000010664	KIF26B	47.8408	0.927898	0.468251	0.000942654	0.00342801
ENSGALG00000015053	GLDC	2704.98	0.929677	0.099994	4.6e-22	1.65e-20
ENSGALG00000008155	KCTD18	18.6718	0.930352	0.818778	0.00234767	0.00767824
ENSGALG00000007337	LPP	498.191	0.931607	0.199252	6.98e-08	5.74e-07
ENSGALG00000033278	NLRC3	55.5894	0.932466	0.282543	2.09e-05	0.000108794
ENSGALG00000006454	SLC22A18	4.89516	0.933012	1.33202	0.000707863	0.0026541
ENSGALG00000002615	DEF6	221.874	0.933296	0.190803	2.43e-08	2.15e-07
ENSGALG00000045469	BCAN	1043.02	0.934167	0.122715	7.99e-16	1.68e-14
ENSGALG00000028471	CNPY3	4710.73	0.934735	0.0950202	2.56e-24	1.11e-22
ENSGALG00000006158	ACVR2B	81.0077	0.935045	0.259965	7.05e-06	4.05e-05
ENSGALG00000038089	EGFR	15772.6	0.93543	0.0818973	1.12e-31	7.73e-30
ENSGALG00000003323	NECAB2	1551.49	0.939617	0.139612	4.78e-13	7.4e-12
ENSGALG00000052648	PRR14L	2314.01	0.940143	0.183547	7.46e-09	7.07e-08
ENSGALG00000049065	ZFPM1	10302.7	0.940555	0.0866442	6.48e-29	3.71e-27
ENSGALG00000047289	TNFAIP8L3	115.815	0.942257	0.298436	3.35e-05	0.000166347
ENSGALG00000008663	DDAH1	972.958	0.942763	0.130281	1.35e-14	2.47e-13
ENSGALG00000003677	NTNG2	116.559	0.942932	0.27894	1.54e-05	8.25e-05
ENSGALG00000051367		22.3858	0.945505	0.471701	0.000843765	0.00310075
ENSGALG00000000736	MATK	165.293	0.946069	0.211846	1.85e-07	1.41e-06
ENSGALG00000004074	KCNS1	208.014	0.947617	0.205751	9.65e-08	7.76e-07
ENSGALG00000002234	UNC13D	1651.79	0.948314	0.16295	1.56e-10	1.84e-09
ENSGALG00000036543	ZBTB38	208.572	0.950159	0.174494	1.32e-09	1.36e-08
ENSGALG00000002199	KLHL17	340.998	0.950613	0.14522	1.66e-12	2.44e-11
ENSGALG00000010497	SLC29A4	261.217	0.950802	0.161786	1.11e-10	1.34e-09
ENSGALG00000006045	SH3GL3	163.199	0.951169	0.171437	7.43e-10	7.91e-09
ENSGALG00000051213	DUSP21	99.9131	0.951644	0.323564	6.64e-05	0.000312711
ENSGALG00000046794		45.3952	0.952629	0.365984	0.000182755	0.000785674
ENSGALG00000040995		351.63	0.953661	0.287373	1.88e-05	9.88e-05
ENSGALG00000042521	MPP3	785.152	0.95386	0.222458	4.08e-07	2.93e-06
ENSGALG00000032679	GCSH	1123.03	0.956687	0.121926	1.33e-16	3e-15
ENSGALG00000048294		18.5122	0.957774	0.516492	0.00109425	0.00391984
ENSGALG00000013948	RASL11B	335.04	0.958251	0.152238	8.55e-12	1.16e-10
ENSGALG00000035836	LDHB	10648.1	0.9584	0.0908708	1.87e-27	9.8e-26
ENSGALG00000008007	ITGA11	39.8592	0.959088	0.406212	0.000345765	0.00138876
ENSGALG00000042750	ND1	298548	0.959599	0.277179	1.11e-05	6.12e-05
ENSGALG00000032079	CYTB	298457	0.959623	0.295905	2.41e-05	0.000123836
ENSGALG00000029617	COL17A1	59.6542	0.960325	0.371591	0.000188541	0.000808506
ENSGALG00000025692		187.026	0.960516	0.23035	6.77e-07	4.66e-06
ENSGALG00000038152	ABCC6	262.661	0.961856	0.247315	2.17e-06	1.36e-05
ENSGALG00000043219	HOXB3	787.532	0.962888	0.153348	9.46e-12	1.28e-10
ENSGALG00000030904	LRP1	63494.2	0.96393	0.0691928	1.6e-45	2.13e-43
ENSGALG00000008901	PTGFR	958.875	0.963985	0.100847	4.11e-23	1.62e-21
ENSGALG00000037838	ND6	14976.7	0.965796	0.278276	1.07e-05	5.89e-05
ENSGALG00000048873	C3orf14	560.502	0.9671	0.165198	1.28e-10	1.53e-09
ENSGALG00000003882	SMARCE1	7226.68	0.967502	0.0869375	3.36e-30	2.08e-28
ENSGALG00000028880	FDPS	8994.79	0.967641	0.0905058	4.06e-28	2.22e-26
ENSGALG00000050798		19.408	0.969172	0.661087	0.00183217	0.00614693
ENSGALG00000015442	FSD1L	76.6514	0.970979	0.32025	4.75e-05	0.000229896
ENSGALG00000054322		934.946	0.971806	0.224982	3.5e-07	2.54e-06
ENSGALG00000014758	ARHGAP28	1198.04	0.974206	0.136304	2.68e-14	4.75e-13
ENSGALG00000000636	MDM4	1267.69	0.974894	0.293322	1.77e-05	9.38e-05
ENSGALG00000013304	SLC5A12	251.886	0.975273	0.212319	1.01e-07	8.07e-07
ENSGALG00000041922		125.79	0.975275	0.284429	1.22e-05	6.63e-05
ENSGALG00000005156		403.879	0.975297	0.174695	6.15e-10	6.63e-09
ENSGALG00000002864	LRRTM3	3183	0.975466	0.0798352	9.57e-36	7.98e-34
ENSGALG00000010055	DAAM2	469.648	0.975506	0.190834	7.85e-09	7.39e-08
ENSGALG00000011594	NR1H4	16.4477	0.976124	0.789872	0.0019606	0.00653207
ENSGALG00000012163	BDNF	131.509	0.976227	0.302587	2.47e-05	0.000126399
ENSGALG00000055129		70.8254	0.976461	0.350536	0.000100743	0.000456782
ENSGALG00000017050	SMAD9	231.935	0.976951	0.189	5.83e-09	5.58e-08
ENSGALG00000014509	BST1	115.618	0.977679	0.272085	6.66e-06	3.84e-05
ENSGALG00000025800		33.706	0.978461	0.481326	0.000708557	0.00265605
ENSGALG00000001331	ST14	3064.96	0.979766	0.0449567	1.16e-106	7.43e-104
ENSGALG00000048379		2729.5	0.980919	0.149993	1.78e-12	2.6e-11
ENSGALG00000049636		40.788	0.98384	0.411201	0.000295899	0.00120834
ENSGALG00000031045		217.451	0.984074	0.208321	5.41e-08	4.51e-07
ENSGALG00000016868	NALCN	48.7804	0.984326	0.55524	0.00114756	0.0040803
ENSGALG00000012178	PDGFB	419.192	0.984655	0.133749	5.67e-15	1.09e-13
ENSGALG00000011742	ART4	9.60991	0.985324	1.00083	0.00153251	0.00525768
ENSGALG00000047455		671.244	0.98594	0.117257	1.4e-18	3.87e-17
ENSGALG00000000396	METTL2B	896.536	0.98641	0.124005	5.89e-17	1.37e-15
ENSGALG00000006838		484.883	0.988326	0.148465	8.23e-13	1.24e-11
ENSGALG00000042269	METTL25	213.848	0.98842	0.221422	1.81e-07	1.39e-06
ENSGALG00000031117	STK17A	23.7284	0.988427	0.644905	0.00158265	0.00540182
ENSGALG00000052156		82.14	0.989242	0.364895	0.000121472	0.000541646
ENSGALG00000027255	NRXN3	122.632	0.990204	0.261091	3.06e-06	1.86e-05
ENSGALG00000014681	PCSK1	399.682	0.992473	0.198774	1.44e-08	1.31e-07
ENSGALG00000007447	TUBB1	378.254	0.992828	0.171604	1.94e-10	2.26e-09
ENSGALG00000001264	PLXNA2	117.884	0.992957	0.270724	4.92e-06	2.89e-05
ENSGALG00000039985	CDH11	85.6742	0.995378	0.254714	1.93e-06	1.23e-05
ENSGALG00000005826	DLEC1	81.4233	0.996108	0.263891	3.25e-06	1.97e-05
ENSGALG00000006792	VSTM2L	24.3562	0.997221	0.484893	0.000631795	0.00240057
ENSGALG00000002312	TMEM132E	22.1985	0.997735	0.665211	0.00157458	0.00537797
ENSGALG00000016036	DOP1B	285.182	0.999425	0.283867	8.4e-06	4.75e-05
ENSGALG00000041522	CLCF1	1234.08	1	0.119746	2.32e-18	6.24e-17
ENSGALG00000040770		11512.8	1.00083	0.0772377	8.77e-40	9.18e-38
ENSGALG00000052676	CYP2J22	339.001	1.00114	0.154295	2.53e-12	3.62e-11
ENSGALG00000005580	TMEM56	118.44	1.00188	0.220115	1.2e-07	9.52e-07
ENSGALG00000029401	SIX1	21.265	1.00258	0.745824	0.0017147	0.00579844
ENSGALG00000036229	ND4	245902	1.00343	0.286505	8.92e-06	5.02e-05
ENSGALG00000035785		20.8889	1.00559	0.744152	0.00168783	0.0057139
ENSGALG00000050069		5476.54	1.00612	0.142151	4.57e-14	7.86e-13
ENSGALG00000049027		294.345	1.00638	0.170484	9.76e-11	1.18e-09
ENSGALG00000002579	RIMBP2	180.723	1.00783	0.284856	7.78e-06	4.43e-05
ENSGALG00000049292		18.0192	1.00799	0.706536	0.00160259	0.00546148
ENSGALG00000054203		12.4675	1.01015	0.779044	0.00168088	0.00569234
ENSGALG00000011301	LRRC40	97.88	1.0117	0.237321	4.33e-07	3.08e-06
ENSGALG00000012044	ANK2	256.682	1.01207	0.205521	2.01e-08	1.81e-07
ENSGALG00000004322		102.064	1.01576	0.223023	1.18e-07	9.33e-07
ENSGALG00000030377	MDFI	24.1939	1.01585	0.444335	0.000350947	0.00140737
ENSGALG00000050826		5.45262	1.01654	0.756058	0.00161414	0.00549838
ENSGALG00000005525	SRSF1	16954.7	1.01679	0.0801449	2.94e-38	2.86e-36
ENSGALG00000042505	DSEL	100.028	1.01875	0.299902	1.26e-05	6.86e-05
ENSGALG00000014820	VTCN1	37.8688	1.02071	0.344474	5.28e-05	0.000253143
ENSGALG00000039336	OTX5	411.278	1.02084	0.236315	3.36e-07	2.45e-06
ENSGALG00000009815	TMEM5	175.104	1.02117	0.269939	3.04e-06	1.86e-05
ENSGALG00000017395		15.0838	1.02159	0.657345	0.00135057	0.00471257
ENSGALG00000002957		81.2755	1.02247	0.366677	8.91e-05	0.00040854
ENSGALG00000052980		1149.12	1.02345	0.133836	6.87e-16	1.46e-14
ENSGALG00000009801	C5H15orf41	1136.79	1.0258	0.103307	1.2e-24	5.33e-23
ENSGALG00000029193		1305.77	1.02901	0.306868	1.44e-05	7.77e-05
ENSGALG00000053225		5444.71	1.03016	0.110446	4.11e-22	1.48e-20
ENSGALG00000001740	MGAT5B	123.345	1.03019	0.336369	3.78e-05	0.000185949
ENSGALG00000038283		2169.44	1.03045	0.267662	2.32e-06	1.45e-05
ENSGALG00000034894		11.7994	1.03214	0.872198	0.00151034	0.00518862
ENSGALG00000005214	TERB1	20.2146	1.03252	0.599805	0.00103886	0.00374501
ENSGALG00000013018	TPRKB	792.248	1.03307	0.137473	1.9e-15	3.87e-14
ENSGALG00000003435	PGC	95.3115	1.03319	0.282236	4.75e-06	2.81e-05
ENSGALG00000007809	TSHZ2	2772.09	1.03353	0.109764	1.79e-22	6.7e-21
ENSGALG00000016022	RUNX1	678.91	1.03451	0.134056	4.05e-16	8.79e-15
ENSGALG00000028760	gga-mir-6652	10.222	1.03465	0.734909	0.00144983	0.00501894
ENSGALG00000015234		759.663	1.03526	0.138606	2.68e-15	5.33e-14
ENSGALG00000035845	JPH1	9.59225	1.03599	1.16606	0.000988267	0.00357609
ENSGALG00000030930		440.077	1.03657	0.170878	3.71e-11	4.69e-10
ENSGALG00000054579		96.5327	1.04175	0.359433	6.13e-05	0.000290605
ENSGALG00000013234	HAPLN2	214.499	1.0427	0.306486	1.19e-05	6.5e-05
ENSGALG00000049095		128.038	1.04362	0.235299	1.98e-07	1.51e-06
ENSGALG00000006969	USP28	978.86	1.04421	0.114334	2.53e-21	8.68e-20
ENSGALG00000053268		26.6794	1.04605	0.722457	0.00134679	0.00470259
ENSGALG00000006041	BNC1	3032.4	1.04628	0.0994902	2.96e-27	1.52e-25
ENSGALG00000035975		2831.42	1.04728	0.302913	9.72e-06	5.42e-05
ENSGALG00000027777	CNN2	11203	1.04945	0.110106	6.07e-23	2.34e-21
ENSGALG00000034132	CACFD1	436.421	1.0498	0.152045	1.59e-13	2.59e-12
ENSGALG00000053860		5796.25	1.05057	0.0749512	5.55e-46	7.54e-44
ENSGALG00000041365	SALL4	639.031	1.05202	0.0937004	1.26e-30	7.95e-29
ENSGALG00000029500	ND5	294724	1.05404	0.286224	4.25e-06	2.53e-05
ENSGALG00000013748	CD226	70.5736	1.05476	0.35191	4.4e-05	0.000213931
ENSGALG00000015497	VGLL3	2565.51	1.06121	0.0606109	5.86e-70	1.73e-67
ENSGALG00000042533		151.716	1.06365	0.219976	3.06e-08	2.66e-07
ENSGALG00000039863	DDX25	21.4935	1.06393	0.430373	0.000191229	0.000818946
ENSGALG00000025337	SNORD100	15.9109	1.06503	0.506594	0.000457622	0.00179385
ENSGALG00000039155	ZHX3	612.155	1.06504	0.132501	3.26e-17	7.74e-16
ENSGALG00000045196	LAPTM4B	29.7845	1.06686	0.455098	0.000261337	0.001084
ENSGALG00000023772	HSPB7	9474.73	1.06735	0.0844154	5.35e-38	5.07e-36
ENSGALG00000049567	SPATA22	4.98522	1.07083	1.21351	0.000834948	0.00307055
ENSGALG00000047636		2064.04	1.07153	0.082575	7.46e-40	7.89e-38
ENSGALG00000031375	CHST7	78.3282	1.07228	0.482834	0.000344071	0.00138377
ENSGALG00000032841		247.612	1.07359	0.19989	1.99e-09	2.01e-08
ENSGALG00000046681		7.89484	1.07482	0.740835	0.00119525	0.00423709
ENSGALG00000039219	ADAMTS14	374.523	1.07509	0.155381	1.46e-13	2.38e-12
ENSGALG00000012055		69.9	1.07551	0.292892	4.28e-06	2.55e-05
ENSGALG00000005080	C8H1orf27	1803.3	1.0762	0.0688892	2.42e-56	4.69e-54
ENSGALG00000026613	S100A4	11900.4	1.07669	0.0985851	3.85e-29	2.23e-27
ENSGALG00000031197		744.467	1.07709	0.202794	2.73e-09	2.72e-08
ENSGALG00000051253		5.95199	1.07727	1.16543	0.000908541	0.00331418
ENSGALG00000005332	CACNA1D	562.573	1.07874	0.198272	1.36e-09	1.41e-08
ENSGALG00000017405	NPR3	257.858	1.07891	0.219672	2.1e-08	1.87e-07
ENSGALG00000035317	ID3	21564	1.07958	0.0859758	1.63e-37	1.5e-35
ENSGALG00000002389		618.692	1.07986	0.114208	1.28e-22	4.8e-21
ENSGALG00000026865	XRCC2	270.959	1.08308	0.2028	2.33e-09	2.34e-08
ENSGALG00000003569	TMEM130	169.208	1.08355	0.268367	1.03e-06	6.86e-06
ENSGALG00000023546		563.786	1.08648	0.132	6.81e-18	1.74e-16
ENSGALG00000011220	SLC25A29	637.461	1.08799	0.154723	6.64e-14	1.12e-12
ENSGALG00000048064		93.4865	1.08871	0.431302	0.000155911	0.000680373
ENSGALG00000039461	TNFRSF1A	2698.07	1.09013	0.0836475	3.62e-40	3.93e-38
ENSGALG00000014258		106.322	1.09415	0.315583	8.66e-06	4.88e-05
ENSGALG00000007395		30.2511	1.0979	0.452936	0.000196165	0.00083722
ENSGALG00000034616	INHBA	2867.19	1.0983	0.0747645	3.47e-50	5.33e-48
ENSGALG00000020253		143.101	1.10012	0.220123	1.35e-08	1.24e-07
ENSGALG00000038433	SPON2	59.8097	1.10291	0.434138	0.00014375	0.000632749
ENSGALG00000037889	PTPRT	16.4058	1.10556	1.27318	0.000690359	0.00259863
ENSGALG00000040369	PFKFB3	2627.76	1.10589	0.0786704	3.21e-46	4.39e-44
ENSGALG00000002563	TPM4	7485.74	1.10776	0.136434	1.71e-17	4.17e-16
ENSGALG00000017840		20.6292	1.10812	0.501759	0.000316449	0.00128481
ENSGALG00000030710		106.002	1.10842	0.371824	4.1e-05	0.000200601
ENSGALG00000034030	L3MBTL3	552.548	1.10885	0.168979	1.63e-12	2.4e-11
ENSGALG00000054250		1253.86	1.10957	0.148725	2.95e-15	5.84e-14
ENSGALG00000053315		126.437	1.11059	0.233471	4.32e-08	3.68e-07
ENSGALG00000015101	BNC2	229.124	1.11077	0.216428	6.84e-09	6.5e-08
ENSGALG00000029203	TNNT1	61.2243	1.11137	0.27541	1.01e-06	6.71e-06
ENSGALG00000015511	ROBO1	40.9437	1.1123	0.511498	0.00033654	0.00135633
ENSGALG00000050548		451.357	1.11537	0.162808	2.34e-13	3.74e-12
ENSGALG00000003213	LGALS2	1017.41	1.11566	0.110039	1.53e-25	7.31e-24
ENSGALG00000036798	COL4A1	18.3761	1.11621	0.866479	0.00107991	0.0038775
ENSGALG00000011468	IGFBP5	269.798	1.12164	0.17604	5.59e-12	7.7e-11
ENSGALG00000042478	ND4L	37808.6	1.12382	0.299601	2.96e-06	1.81e-05
ENSGALG00000001926	HSPB1	12905.5	1.1252	0.126338	2.04e-20	6.47e-19
ENSGALG00000051001		273.31	1.13057	0.163098	1.34e-13	2.19e-12
ENSGALG00000011426	RNASET2	256.307	1.13271	0.144933	1.94e-16	4.29e-15
ENSGALG00000003149		880.782	1.13401	0.151231	2.21e-15	4.46e-14
ENSGALG00000039474	ID4	13175.9	1.13463	0.0853252	1.08e-41	1.28e-39
ENSGALG00000011369	LHX8	69.2581	1.13555	0.456005	0.0001494	0.00065457
ENSGALG00000048031		151.698	1.14048	0.200956	3.64e-10	4.09e-09
ENSGALG00000028186	RERG	241.843	1.1407	0.274824	6.07e-07	4.22e-06
ENSGALG00000037709	SDF2	1908.1	1.14707	0.149876	6.79e-16	1.44e-14
ENSGALG00000043572	FAM89A	1406.39	1.14846	0.0872978	7.03e-41	8.17e-39
ENSGALG00000016362	SH3YL1	34.4793	1.15123	0.700676	0.000739563	0.00275611
ENSGALG00000036240	AKAP12	442.763	1.15281	0.178121	2.9e-12	4.11e-11
ENSGALG00000047969		71.209	1.15458	0.314863	3.84e-06	2.31e-05
ENSGALG00000052221		746.167	1.15467	0.180237	4.42e-12	6.16e-11
ENSGALG00000013239		247.281	1.15699	0.189076	2.66e-11	3.43e-10
ENSGALG00000014455	LPAR5	20.4435	1.15699	0.666088	0.000641193	0.00243206
ENSGALG00000052818		127.799	1.15801	0.2611	1.79e-07	1.37e-06
ENSGALG00000045898		38.9537	1.16021	0.541753	0.000310369	0.0012628
ENSGALG00000047879		788.93	1.16385	0.129337	8.73e-21	2.86e-19
ENSGALG00000047829		283.721	1.16409	0.201294	1.94e-10	2.27e-09
ENSGALG00000041491	ACKR4	415.201	1.16418	0.231912	1.16e-08	1.07e-07
ENSGALG00000034999	ZHX1	1227.4	1.16799	0.135798	2.93e-19	8.6e-18
ENSGALG00000006855	MELTF	159.805	1.17347	0.290184	8.95e-07	6.02e-06
ENSGALG00000006491	ANKRD1	38.1684	1.1735	0.44871	9.78e-05	0.000445106
ENSGALG00000025355		16.1958	1.17383	0.506595	0.000202803	0.000862192
ENSGALG00000028308	TNS4	1042.05	1.17526	0.0913959	3.31e-39	3.36e-37
ENSGALG00000013741	SYTL3	80.2317	1.17545	0.2672	2.05e-07	1.55e-06
ENSGALG00000011394	CYP2J21	105.629	1.17703	0.220659	2.3e-09	2.31e-08
ENSGALG00000004370	MAP2K6	513.757	1.17787	0.11473	4.01e-26	1.95e-24
ENSGALG00000002546	COL5A1	74054	1.17934	0.140789	1.97e-18	5.32e-17
ENSGALG00000050186		16.7221	1.17989	0.509221	0.00019921	0.000849508
ENSGALG00000004669	ASPA	224.001	1.18047	0.144778	1.26e-17	3.12e-16
ENSGALG00000028696	FTL	11.4015	1.18631	1.03393	0.000798301	0.00294992
ENSGALG00000053976	gga-mir-1454	18.591	1.18661	0.51202	0.000195057	0.000832955
ENSGALG00000013615	MTUS1	262.798	1.18703	0.146807	2.17e-17	5.26e-16
ENSGALG00000038421	RWDD3	433.965	1.18893	0.149081	5.3e-17	1.23e-15
ENSGALG00000049360	PPP1R10	1358.46	1.19004	0.123241	1.79e-23	7.37e-22
ENSGALG00000030800	IL31RA	288.258	1.19015	0.168724	5.51e-14	9.39e-13
ENSGALG00000017079	USPL1	2282.43	1.19244	0.13915	3.77e-19	1.09e-17
ENSGALG00000015849	ME1	1868.46	1.19371	0.0970061	3.54e-36	3.05e-34
ENSGALG00000047172		17.7502	1.19374	0.474513	0.000119222	0.000532853
ENSGALG00000012747	NEDD9	2845.1	1.19387	0.0769926	1.38e-55	2.61e-53
ENSGALG00000042103	C5H11ORF96	24.871	1.19639	0.587639	0.000340854	0.00137191
ENSGALG00000037369		337.041	1.19757	0.250071	3.44e-08	2.96e-07
ENSGALG00000049205		82.5538	1.19869	0.277652	2.82e-07	2.09e-06
ENSGALG00000005294	PPFIBP2	46.1593	1.19934	0.530281	0.000212664	0.000900622
ENSGALG00000015799	ELAVL2	705.888	1.20231	0.129688	6.92e-22	2.43e-20
ENSGALG00000008465	SORCS1	175.514	1.20515	0.215658	5.66e-10	6.14e-09
ENSGALG00000030853		90.017	1.20553	0.246218	2.04e-08	1.83e-07
ENSGALG00000049586		68.954	1.20682	0.408732	3.55e-05	0.000175848
ENSGALG00000032428		400.299	1.20789	0.192709	1.02e-11	1.37e-10
ENSGALG00000015305	NR2E1	46.3161	1.20906	0.426319	4.92e-05	0.000237505
ENSGALG00000021092		11.1058	1.20955	0.812498	0.000692179	0.00260292
ENSGALG00000006563	SEMA3D	243.18	1.20983	0.248304	2.28e-08	2.03e-07
ENSGALG00000007681	HTR2B	67.0869	1.21285	0.382878	1.84e-05	9.7e-05
ENSGALG00000035282	IGF2	45.6286	1.21948	0.365698	1.07e-05	5.89e-05
ENSGALG00000040001		249.154	1.21964	0.148824	8.58e-18	2.17e-16
ENSGALG00000053434		744.167	1.22238	0.0962726	2.49e-38	2.44e-36
ENSGALG00000053164		362.187	1.22602	0.148498	5.14e-18	1.33e-16
ENSGALG00000036067	RBFA	157.192	1.2295	0.14917	5.74e-18	1.48e-16
ENSGALG00000012965	FAM105A	1142.47	1.22991	0.123486	8.5e-25	3.82e-23
ENSGALG00000049299	TMEM170B	359.768	1.23008	0.163408	1.65e-15	3.38e-14
ENSGALG00000008815	LRRN4	3904.75	1.23487	0.116542	1.18e-27	6.36e-26
ENSGALG00000022733	ARL11	483.729	1.23802	0.156227	7.52e-17	1.73e-15
ENSGALG00000035505	AOAH	87.086	1.24069	0.311751	1.04e-06	6.9e-06
ENSGALG00000006677	P4HA2	17769.4	1.24113	0.0604643	5.2e-95	2.75e-92
ENSGALG00000032980	DLGAP3	58.2072	1.24162	0.389274	1.61e-05	8.61e-05
ENSGALG00000019802	PHLDA3	76.4899	1.24301	0.281971	1.8e-07	1.38e-06
ENSGALG00000001183	MYH10	50593.5	1.24332	0.0483402	2.93e-147	5e-144
ENSGALG00000011696	JAG2	1432.01	1.24422	0.113084	1.4e-29	8.29e-28
ENSGALG00000046903		78.7182	1.24524	0.316951	1.25e-06	8.22e-06
ENSGALG00000020876	AOX2	40.126	1.24867	0.576661	0.000223943	0.000942661
ENSGALG00000001534	TMEM88B	65.5186	1.24899	0.407529	2.32e-05	0.00011945
ENSGALG00000015779	PM20D2	82.0732	1.24972	0.284815	1.95e-07	1.49e-06
ENSGALG00000029270	GATA3	145.377	1.25246	0.252944	1.48e-08	1.35e-07
ENSGALG00000011298	RARB	124.19	1.2534	0.223033	4.5e-10	4.97e-09
ENSGALG00000040794	CCNE2	471.173	1.25393	0.134129	3.1e-22	1.12e-20
ENSGALG00000031331	PKIG	133.587	1.25944	0.340285	2.83e-06	1.74e-05
ENSGALG00000013838	ADAM20	55.4059	1.2612	0.329718	1.8e-06	1.15e-05
ENSGALG00000008306	FGL2	585.551	1.26169	0.118227	5e-28	2.72e-26
ENSGALG00000053959		25.5418	1.26398	0.638665	0.000303141	0.00123601
ENSGALG00000031548		323.564	1.2669	0.280405	1.08e-07	8.61e-07
ENSGALG00000002699	VAV2	9131.74	1.27232	0.104143	9.26e-36	7.76e-34
ENSGALG00000034456	PRELP	92.0353	1.27422	0.412045	2.01e-05	0.000105285
ENSGALG00000032053	SPSB4	63.6544	1.27504	0.422047	2.48e-05	0.00012677
ENSGALG00000011488	CMTM7	216.399	1.27659	0.190121	5.18e-13	7.97e-12
ENSGALG00000046322		577.745	1.27704	0.180372	4.13e-14	7.15e-13
ENSGALG00000016473	OSR1	445.745	1.28241	0.167058	4.92e-16	1.06e-14
ENSGALG00000034326	TMEM158	7782.12	1.28302	0.129016	9.06e-25	4.05e-23
ENSGALG00000002260	CISH	3933.56	1.28306	0.116908	1.77e-29	1.04e-27
ENSGALG00000006190	FHL1	293.391	1.28397	0.20725	1.46e-11	1.93e-10
ENSGALG00000046715		191.398	1.28537	0.168322	6.67e-16	1.42e-14
ENSGALG00000053107		373.244	1.28613	0.158147	1.3e-17	3.23e-16
ENSGALG00000014485	LDB2	44.3714	1.28706	0.397376	1.25e-05	6.81e-05
ENSGALG00000054794		40.9468	1.2875	0.455955	4.18e-05	0.000204349
ENSGALG00000023904	FIBIN	32160.1	1.28853	0.0765364	4.99e-65	1.37e-62
ENSGALG00000038923		96.0144	1.28883	0.227285	3.23e-10	3.67e-09
ENSGALG00000031860		29.0834	1.29223	0.4584	4.18e-05	0.000204454
ENSGALG00000015066	WASF1	48.3651	1.29491	0.361808	4.05e-06	2.42e-05
ENSGALG00000047472		419.08	1.29724	0.110505	2.78e-33	2.08e-31
ENSGALG00000026948	ADD2	142.761	1.29768	0.198009	1.46e-12	2.15e-11
ENSGALG00000051992	CYP2J23	129.141	1.29916	0.221748	1.08e-10	1.31e-09
ENSGALG00000021442	CARMIL2	52.9783	1.30275	0.385707	7.8e-06	4.44e-05
ENSGALG00000054582		10.3057	1.3028	0.676679	0.000292485	0.00119766
ENSGALG00000007929	DIXDC1	37.1586	1.30429	0.435796	2.5e-05	0.000128027
ENSGALG00000052645		513.364	1.30436	0.104553	3.5e-37	3.14e-35
ENSGALG00000027483	GLRX	192.848	1.30518	0.19541	6.28e-13	9.63e-12
ENSGALG00000005493		21.4382	1.30546	0.549919	0.000121105	0.000540166
ENSGALG00000040720	GRID2IP	21.5353	1.30567	0.858382	0.000480353	0.00187437
ENSGALG00000038624		198.435	1.30739	0.184236	3.5e-14	6.13e-13
ENSGALG00000042677		299.807	1.30749	0.258669	8.21e-09	7.71e-08
ENSGALG00000002846	NEURL1B	126.547	1.30767	0.247786	2.64e-09	2.64e-08
ENSGALG00000006901	AATK	61.5062	1.30882	0.318112	5.46e-07	3.82e-06
ENSGALG00000054378	LRRC43	73.7325	1.3098	0.301222	2.09e-07	1.58e-06
ENSGALG00000039705	GFPT2	9268.85	1.31031	0.0423552	1.42e-211	1.09e-207
ENSGALG00000033453		431.293	1.31641	0.140922	2.96e-22	1.08e-20
ENSGALG00000011690	CLBA1	189.474	1.31735	0.208863	6.91e-12	9.42e-11
ENSGALG00000011813	HEG1	396.207	1.32	0.263911	1.05e-08	9.67e-08
ENSGALG00000006670	PPP1R3C	2557.4	1.32158	0.0921952	4.52e-48	6.54e-46
ENSGALG00000008518		29.7001	1.32377	0.54212	9.85e-05	0.000448097
ENSGALG00000050611		204.584	1.32545	0.125077	9.78e-28	5.3e-26
ENSGALG00000050283		672.448	1.32703	0.259882	6.15e-09	5.88e-08
ENSGALG00000054749		45.5367	1.33348	0.315563	3.34e-07	2.44e-06
ENSGALG00000048128		14.8002	1.33518	0.554472	0.000102958	0.000465999
ENSGALG00000052589		152.936	1.33609	0.180005	3.07e-15	6.07e-14
ENSGALG00000049775	gga-mir-12227	19.3183	1.348	0.411097	9.64e-06	5.39e-05
ENSGALG00000047585		59.079	1.34936	0.308229	1.73e-07	1.33e-06
ENSGALG00000040929	C15orf62	240.4	1.34985	0.231406	1.15e-10	1.39e-09
ENSGALG00000049807		114.148	1.35067	0.182651	3.67e-15	7.19e-14
ENSGALG00000015044	GTF3C6	185.41	1.35136	0.204793	9.89e-13	1.49e-11
ENSGALG00000010806	RIN3	236.813	1.3565	0.21599	7.63e-12	1.04e-10
ENSGALG00000029429	TGFBI	133.396	1.36131	0.224543	2.9e-11	3.73e-10
ENSGALG00000005643	LYVE1	284.559	1.36493	0.251171	1.05e-09	1.1e-08
ENSGALG00000021685	SERINC2	1842.53	1.36554	0.0852625	3.07e-59	6.72e-57
ENSGALG00000052522		15.2876	1.36609	0.525214	6.01e-05	0.000285615
ENSGALG00000038850	WNK2	343.557	1.36731	0.130212	2.48e-27	1.29e-25
ENSGALG00000047266		21.8328	1.36959	0.522152	5.65e-05	0.000269316
ENSGALG00000019171	GATD3A	1147.29	1.37608	0.107149	2.77e-39	2.86e-37
ENSGALG00000002742	TMEM132B	1901.4	1.3861	0.149589	5.15e-22	1.84e-20
ENSGALG00000011549	ANKS1B	718.098	1.38715	0.106691	3.43e-40	3.78e-38
ENSGALG00000037687		58.3755	1.38782	0.418077	7.76e-06	4.42e-05
ENSGALG00000009552		469.855	1.38875	0.189189	5.07e-15	9.77e-14
ENSGALG00000026945	CIDEC	44.205	1.39694	0.426866	8.78e-06	4.95e-05
ENSGALG00000007905	LAMB1	128.569	1.40408	0.263068	1.63e-09	1.67e-08
ENSGALG00000012319		167.146	1.40526	0.209497	4.28e-13	6.65e-12
ENSGALG00000008909	USP13	140.245	1.41094	0.256819	6.94e-10	7.43e-09
ENSGALG00000038760		111.172	1.4116	0.311348	7.82e-08	6.37e-07
ENSGALG00000003713		823.32	1.41357	0.103617	6.04e-44	7.65e-42
ENSGALG00000027165	RSFR	1533.38	1.41876	0.101825	1.06e-45	1.42e-43
ENSGALG00000014659	C1R	263.628	1.41903	0.127889	3.38e-30	2.08e-28
ENSGALG00000014818	TRIM45	2415.75	1.42167	0.0751254	1.96e-81	7.91e-79
ENSGALG00000039193	AGRN	1418.65	1.42168	0.119615	3.64e-34	2.87e-32
ENSGALG00000054099		155.675	1.42476	0.373574	1.36e-06	8.86e-06
ENSGALG00000043035	SHISA2	2913.74	1.42587	0.0973316	3.56e-50	5.4e-48
ENSGALG00000054032		52.9373	1.42848	0.440923	9.01e-06	5.07e-05
ENSGALG00000050154		12.0769	1.4285	0.52328	3.69e-05	0.000182196
ENSGALG00000012179	SOCS4	697.046	1.43064	0.11357	5.59e-38	5.26e-36
ENSGALG00000002982	SLC2A6	840.737	1.43472	0.153568	2.23e-22	8.19e-21
ENSGALG00000036306		6.37286	1.43697	1.70208	0.000190427	0.000816141
ENSGALG00000010935	PTPRQ	6130.49	1.43737	0.10449	1.19e-44	1.54e-42
ENSGALG00000007912	ATP9A	81.3256	1.43758	0.261857	6.72e-10	7.22e-09
ENSGALG00000052636		279.794	1.44612	0.13742	1.6e-27	8.51e-26
ENSGALG00000015347	ZPLD1	61.783	1.44986	0.534732	3.65e-05	0.000180489
ENSGALG00000047320	MFAP5	161.561	1.45052	0.304499	2.56e-08	2.26e-07
ENSGALG00000049965		192.39	1.45124	0.208651	7.04e-14	1.18e-12
ENSGALG00000002055	HES4	368.138	1.45646	0.148843	2.97e-24	1.28e-22
ENSGALG00000036763		244.979	1.45722	0.184529	6.04e-17	1.4e-15
ENSGALG00000049871		21926.9	1.45864	0.0560554	7.04e-151	1.35e-147
ENSGALG00000014603	C1S	261.037	1.45943	0.176383	2.77e-18	7.42e-17
ENSGALG00000034590	CELF2	78.1732	1.46036	0.357909	4.63e-07	3.29e-06
ENSGALG00000040296		188.616	1.46707	0.244036	3.16e-11	4.05e-10
ENSGALG00000034107	TRIM63	159.786	1.47021	0.296317	9.57e-09	8.91e-08
ENSGALG00000038747	TM4SF18	68.7976	1.47098	0.262496	3.34e-10	3.78e-09
ENSGALG00000046914		559.069	1.47123	0.13598	6.23e-29	3.58e-27
ENSGALG00000040672	IGFBP4	1437.63	1.47155	0.125995	3.68e-33	2.73e-31
ENSGALG00000037336	PRTG	928.235	1.47317	0.223433	7.89e-13	1.2e-11
ENSGALG00000031116	SNORD57	16.1008	1.4749	0.477908	1.26e-05	6.85e-05
ENSGALG00000019003	PRAG1	197.285	1.47814	0.159013	3.11e-22	1.12e-20
ENSGALG00000007543	APCDD1L	1751.49	1.48819	0.103099	6.98e-49	1.03e-46
ENSGALG00000011803	EMP1	5688.83	1.48875	0.100202	1.39e-51	2.26e-49
ENSGALG00000005430	ALS2CL	642.575	1.49183	0.257432	1.07e-10	1.3e-09
ENSGALG00000035129	RBM12B	1991.49	1.49186	0.128603	8.8e-33	6.43e-31
ENSGALG00000019718	KRT13	73.1719	1.49294	0.340435	1.25e-07	9.87e-07
ENSGALG00000006575	VIPR2	21.7954	1.49322	0.497843	1.53e-05	8.22e-05
ENSGALG00000034213	TNFRSF1B	423.228	1.50029	0.127008	7.08e-34	5.43e-32
ENSGALG00000023172		19.4483	1.50144	0.888467	0.000217572	0.000918869
ENSGALG00000003642	PDGFA	160.406	1.50147	0.307422	1.3e-08	1.19e-07
ENSGALG00000007218	MB21D2	286.321	1.50834	0.148637	6.8e-26	3.26e-24
ENSGALG00000040532	ZIC1	70.7608	1.50849	0.369556	4.13e-07	2.96e-06
ENSGALG00000028721	LMOD1	6189.25	1.50857	0.0715197	1.99e-100	1.13e-97
ENSGALG00000044612	INAVA	129.23	1.50945	0.217371	6.62e-14	1.12e-12
ENSGALG00000039249		443.102	1.5131	0.243856	8.71e-12	1.18e-10
ENSGALG00000006174	VSTM4	441.069	1.52018	0.154761	1.73e-24	7.58e-23
ENSGALG00000010936	MYF6	251.245	1.52182	0.33921	7.61e-08	6.21e-07
ENSGALG00000013803	ADGRG6	911.962	1.52691	0.121109	3.79e-38	3.63e-36
ENSGALG00000052756		83.1558	1.52828	0.24214	4.29e-12	6e-11
ENSGALG00000021031	CXCR7	954.057	1.52839	0.118472	8.8e-40	9.18e-38
ENSGALG00000045125	GP5	136.066	1.53445	0.215699	1.87e-14	3.37e-13
ENSGALG00000006053	SLC2A11	498.345	1.53542	0.0950073	1.88e-60	4.36e-58
ENSGALG00000014264	NSUN7	107.364	1.53784	0.205775	1.31e-15	2.72e-14
ENSGALG00000030802	SHROOM2	856.701	1.53911	0.0964853	5.43e-59	1.14e-56
ENSGALG00000043787	DEPDC6	241.131	1.55066	0.16226	2.15e-23	8.77e-22
ENSGALG00000000558	SLC1A6	15.6209	1.55533	0.750604	0.00010556	0.000477356
ENSGALG00000017179	PDGFD	72.9214	1.56097	0.43533	2.19e-06	1.37e-05
ENSGALG00000049343		1898.22	1.5617	0.26893	8.47e-11	1.03e-09
ENSGALG00000005208	S1PR1	160.259	1.57153	0.277034	1.79e-10	2.1e-09
ENSGALG00000008257	MERTK	489.367	1.57242	0.136006	1.12e-32	8.05e-31
ENSGALG00000043772		65.5931	1.57339	0.300555	1.91e-09	1.94e-08
ENSGALG00000026846	JMJD7	92.5293	1.57456	0.332493	2.21e-08	1.97e-07
ENSGALG00000050627		1009.71	1.58506	0.2255	3e-14	5.29e-13
ENSGALG00000049810		345.083	1.58764	0.208801	4.29e-16	9.27e-15
ENSGALG00000049663		2094.8	1.5916	0.246719	1.49e-12	2.2e-11
ENSGALG00000050831		241.787	1.60178	0.162729	1.14e-24	5.06e-23
ENSGALG00000001857	C1QTNF12	402.443	1.602	0.183409	3.68e-20	1.15e-18
ENSGALG00000048570		728.925	1.61009	0.220971	4.38e-15	8.47e-14
ENSGALG00000048847		618.482	1.61829	0.252651	1.87e-12	2.73e-11
ENSGALG00000013980	SLC2A12	84.5021	1.62511	0.398405	3.17e-07	2.33e-06
ENSGALG00000038320	COLGALT2	43.2179	1.62921	0.351807	3.11e-08	2.7e-07
ENSGALG00000015708	FGFR3	1149.4	1.63113	0.080144	6.86e-94	3.51e-91
ENSGALG00000007819	PDZRN3	662.552	1.64599	0.127127	3.49e-40	3.83e-38
ENSGALG00000002283	MAPKAPK3	371.734	1.65007	0.178985	4.02e-22	1.45e-20
ENSGALG00000032220	ELN	47.1444	1.65385	0.40717	3.16e-07	2.32e-06
ENSGALG00000010974	GSC	143.604	1.65487	0.205988	1.2e-17	2.98e-16
ENSGALG00000047383		166.557	1.65552	0.276194	2.2e-11	2.85e-10
ENSGALG00000025884	NABP1	1617.56	1.65726	0.0835662	2.29e-89	9.77e-87
ENSGALG00000046507		596.727	1.65729	0.141545	1.59e-33	1.2e-31
ENSGALG00000030209	CPZ	211.603	1.66738	0.189411	1.68e-20	5.38e-19
ENSGALG00000051515		5.7541	1.66961	1.827	0.000119936	0.000535421
ENSGALG00000041750	ADAMTS9	468.636	1.67002	0.149473	7.32e-31	4.76e-29
ENSGALG00000029968	GADD45B	8725.08	1.67506	0.0869067	1.22e-84	5.04e-82
ENSGALG00000047196		325.145	1.67531	0.201818	1.25e-18	3.46e-17
ENSGALG00000035016	ID2	3844.95	1.6758	0.0560303	2.11e-198	8.09e-195
ENSGALG00000000866	SELENBP1	861.801	1.67765	0.0934156	5.55e-74	1.74e-71
ENSGALG00000018439	DLX1	10.0258	1.67781	1.04796	0.000147473	0.000647051
ENSGALG00000049657		54.0015	1.67943	0.394082	1.34e-07	1.05e-06
ENSGALG00000044739		829.323	1.69396	0.199744	2.6e-19	7.66e-18
ENSGALG00000012988	B4GALNT3	154.086	1.70954	0.233098	2.35e-15	4.71e-14
ENSGALG00000011630	GLI2	137.001	1.71019	0.425159	3.18e-07	2.34e-06
ENSGALG00000015253	COL8A1	353.996	1.71457	0.250811	8.14e-14	1.36e-12
ENSGALG00000013846	ARFGEF3	904.042	1.71799	0.228301	5.47e-16	1.18e-14
ENSGALG00000006776	KLHDC8B	425.013	1.71995	0.208302	1.6e-18	4.37e-17
ENSGALG00000044241		392.785	1.72191	0.214803	1.15e-17	2.86e-16
ENSGALG00000032066		14.0208	1.72528	1.2546	0.000156666	0.000683282
ENSGALG00000026005	DIO2	4065.24	1.73003	0.0692469	1.11e-139	1.31e-136
ENSGALG00000046125	PECAM1	720.33	1.73433	0.242341	8.01e-15	1.51e-13
ENSGALG00000031637	ICOSLG	183.934	1.74175	0.260517	2.1e-13	3.37e-12
ENSGALG00000055053	PRSS35	312.122	1.76463	0.201022	1.6e-20	5.13e-19
ENSGALG00000011823	FAT4	603.04	1.78435	0.154921	1.04e-32	7.56e-31
ENSGALG00000037675	COL14A1	22.1997	1.78552	0.890115	6.38e-05	0.000301265
ENSGALG00000009493	TMEM229B	153.809	1.78644	0.282312	1.94e-12	2.82e-11
ENSGALG00000027514	SCEL	156.68	1.79976	0.228804	3.07e-17	7.34e-16
ENSGALG00000005217	MOGAT1	293.544	1.80812	0.177166	1.65e-26	8.12e-25
ENSGALG00000048343		461.447	1.8214	0.123759	4.51e-51	7.13e-49
ENSGALG00000029921	CSRP2	17321.7	1.82727	0.0780295	2.6e-123	2.49e-120
ENSGALG00000005321	LAMA5	10694.5	1.82962	0.109961	3.27e-64	8.5e-62
ENSGALG00000034024	RAPGEF5	121.015	1.83031	0.265	3.59e-14	6.25e-13
ENSGALG00000021180	PAQR9	126.631	1.83163	0.248995	1.41e-15	2.9e-14
ENSGALG00000028803	B3GNT4	212.993	1.83174	0.30365	1.07e-11	1.43e-10
ENSGALG00000016554	ACE2	87.4098	1.832	0.435617	1.13e-07	9.01e-07
ENSGALG00000052510		60.2526	1.85295	0.23667	3.52e-17	8.34e-16
ENSGALG00000050751		296.69	1.862	0.218505	1.13e-19	3.43e-18
ENSGALG00000035679	LMO1	755.612	1.87196	0.122609	9.88e-55	1.8e-52
ENSGALG00000044799	VSIG4	60.8424	1.88028	0.450831	1.14e-07	9.09e-07
ENSGALG00000002207	ATP6V1G3	235.001	1.88294	0.157407	4.13e-35	3.32e-33
ENSGALG00000000703	SLC45A3	165.27	1.88449	0.214878	1.22e-20	3.95e-19
ENSGALG00000015056	LAMA3	1401.72	1.89266	0.151457	5.65e-38	5.28e-36
ENSGALG00000050645		33.1648	1.89414	0.565702	2e-06	1.27e-05
ENSGALG00000038902	PIM1	11748.9	1.89468	0.0543337	1.58e-268	2.42e-264
ENSGALG00000004660		74.3354	1.89723	0.275843	3.6e-14	6.27e-13
ENSGALG00000001727	LZTS1	1439.61	1.90125	0.128178	6.48e-52	1.08e-49
ENSGALG00000003594	ANK1	80.0299	1.91287	0.33113	3.86e-11	4.86e-10
ENSGALG00000039571	PRPH	52.3319	1.91332	0.401002	7.64e-09	7.22e-08
ENSGALG00000051551		138.579	1.91476	0.258516	7.56e-16	1.6e-14
ENSGALG00000016356	TDRP	120.83	1.91853	0.218024	8.46e-21	2.78e-19
ENSGALG00000011136	CAPN9	269.926	1.91996	0.26776	4.23e-15	8.21e-14
ENSGALG00000007920	PRR5L	244.175	1.93571	0.190702	2.01e-26	9.83e-25
ENSGALG00000051786		38.5685	1.9386	0.382575	1.68e-09	1.72e-08
ENSGALG00000047024	ZNF469	7493.57	1.95496	0.15551	1.83e-38	1.81e-36
ENSGALG00000031564		7.18832	1.96545	1.99801	6.84e-05	0.000321534
ENSGALG00000005772	BOK	265.179	1.9778	0.207066	6.76e-24	2.85e-22
ENSGALG00000053746		36.1544	1.99788	0.554281	6.77e-07	4.66e-06
ENSGALG00000035972	KRT75	39.2373	2.00401	0.99282	3.79e-05	0.000186406
ENSGALG00000054822		83.0999	2.00504	0.244714	1.18e-18	3.27e-17
ENSGALG00000047374		49.9976	2.00603	0.355495	6.33e-11	7.79e-10
ENSGALG00000016581	TCEANC	209.387	2.0267	0.179075	5.1e-32	3.6e-30
ENSGALG00000005631	TRPM2	518.816	2.04755	0.159619	5.23e-40	5.65e-38
ENSGALG00000039008		44.4516	2.05614	0.358712	3.28e-11	4.19e-10
ENSGALG00000000604		179.386	2.06749	0.190745	9.33e-30	5.64e-28
ENSGALG00000034722	TLR2A	39.1141	2.0803	0.525245	1.53e-07	1.19e-06
ENSGALG00000015425	LPL	76.0323	2.08753	0.336138	1.68e-12	2.46e-11
ENSGALG00000034453	SAMD11	2349.15	2.1083	0.0946411	2.47e-112	1.9e-109
ENSGALG00000033520	DCSTAMP	1246.55	2.11214	0.146945	2.87e-49	4.31e-47
ENSGALG00000050400		34.3364	2.11343	1.03313	2.89e-05	0.000145792
ENSGALG00000023882	MALL	26.7054	2.1164	0.529612	1.22e-07	9.66e-07
ENSGALG00000033118	FAM83H	391.142	2.13345	0.132813	1.65e-60	3.89e-58
ENSGALG00000028331	gga-mir-6573	5.91322	2.14142	1.14453	3.69e-05	0.000182196
ENSGALG00000054551		139.411	2.16086	0.329069	1.35e-13	2.22e-12
ENSGALG00000011902	TAGLN	11406.4	2.16276	0.118493	6.56e-77	2.4e-74
ENSGALG00000015219		62.8768	2.16358	0.280092	3.14e-17	7.48e-16
ENSGALG00000042077	HIC1	3328.61	2.21815	0.0915415	2.93e-132	3e-129
ENSGALG00000015143	TTR	280.673	2.2272	0.244412	1.95e-22	7.21e-21
ENSGALG00000055056		173.154	2.22796	0.217736	3.52e-27	1.8e-25
ENSGALG00000053632		127.486	2.2321	0.237928	1.56e-23	6.45e-22
ENSGALG00000041634	ACTG2	931.576	2.2433	0.112375	2.97e-91	1.34e-88
ENSGALG00000015428	PSD3	59.9933	2.24796	0.354718	4.68e-13	7.26e-12
ENSGALG00000020554	ADAMTSL1	460.73	2.32872	0.146671	1.74e-59	3.86e-57
ENSGALG00000002955	ADAMTSL2	23317.8	2.33948	0.213204	9.14e-31	5.87e-29
ENSGALG00000008043	CORO2B	52.6266	2.34228	0.530848	1.27e-08	1.16e-07
ENSGALG00000030773	CP	1409.05	2.40098	0.106463	1.97e-115	1.68e-112
ENSGALG00000027536	PERP1	69.1154	2.40319	0.442219	6.79e-11	8.29e-10
ENSGALG00000015908	COL12A1	3962.13	2.4338	0.121996	2.09e-91	9.7e-89
ENSGALG00000009268	FGG	64.63	2.43575	0.321832	4.76e-17	1.12e-15
ENSGALG00000032404	MYH1C	41.8775	2.43929	1.0626	1.01e-05	5.59e-05
ENSGALG00000006106	TNFRSF6B	4435.59	2.45962	0.10941	8.23e-115	6.64e-112
ENSGALG00000010222		13.086	2.46679	1.30251	2.05e-05	0.000107286
ENSGALG00000009239	TLR2B	11.0869	2.48866	0.786806	9.99e-07	6.67e-06
ENSGALG00000053941		5642.44	2.50467	0.0825394	3.29e-205	1.68e-201
ENSGALG00000054110		41.5356	2.52925	0.686815	1.66e-07	1.28e-06
ENSGALG00000051754	KRT17	100.361	2.53718	0.278491	8.18e-23	3.13e-21
ENSGALG00000005936	AGTR2	291.246	2.56949	0.19098	2.72e-44	3.48e-42
ENSGALG00000050129		7.86849	2.5725	2.11936	2.71e-05	0.000137654
ENSGALG00000053524		62.6818	2.58015	0.279286	2.25e-23	9.1e-22
ENSGALG00000047033		7.22125	2.59312	1.91115	2.7e-05	0.000137247
ENSGALG00000048455		6.26138	2.61618	1.89594	2.6e-05	0.000132298
ENSGALG00000042454	DCDC2	23.3432	2.65848	0.77121	3.15e-07	2.31e-06
ENSGALG00000040045	DBH	4.9557	2.70343	2.07161	2.24e-05	0.000115916
ENSGALG00000020561		74.4309	2.73539	0.3696	8.98e-17	2.05e-15
ENSGALG00000041921	CWH43	463.011	2.76889	0.187106	9.26e-53	1.58e-50
ENSGALG00000002855	SARDH	41.4214	2.78082	0.502778	1.98e-11	2.57e-10
ENSGALG00000009042	ISM1	87.9978	2.78598	0.311513	2.32e-22	8.49e-21
ENSGALG00000042123	CLDN23	42.157	2.78702	0.728305	6.88e-08	5.67e-07
ENSGALG00000003690	KRT14	249.851	2.80074	0.23877	5.33e-35	4.26e-33
ENSGALG00000052880		118.957	2.81244	0.243296	3.86e-34	3.02e-32
ENSGALG00000004221	IL22RA1	113.499	2.90851	0.339829	6.22e-21	2.07e-19
ENSGALG00000034868	KRT7	1010.08	3.03491	0.139534	3.45e-108	2.52e-105
ENSGALG00000042257	MYH1F	119.607	3.31559	0.408548	3.16e-19	9.2e-18
ENSGALG00000041042	GABRG3	270.174	3.36023	0.216908	3.07e-57	6.19e-55
ENSGALG00000027207	PERP2	374.267	3.39047	0.187238	2.34e-76	7.96e-74
ENSGALG00000047321		95.0171	3.43085	0.281472	3.17e-37	2.88e-35
ENSGALG00000016299	FAM83B	73.7691	3.43819	0.3321	3.54e-28	1.94e-26
ENSGALG00000054647		13.5771	3.49589	0.733194	1.07e-09	1.12e-08
ENSGALG00000050189		19.0049	3.57975	1.15116	4.77e-07	3.38e-06
ENSGALG00000027323	MYH1D	62.9515	3.69579	0.397175	2.14e-23	8.73e-22
ENSGALG00000045816		9.46401	3.79759	2.50872	5.25e-06	3.07e-05
ENSGALG00000037864	MYH1A	33.4658	3.83549	1.46066	1.17e-06	7.71e-06
ENSGALG00000008367	MDK	417.274	4.10453	0.163066	8.18e-142	1.14e-138
ENSGALG00000039634	KRT80	12.4813	4.33651	2.06228	1.57e-06	1.01e-05
ENSGALG00000028284	PTX3	531.397	4.62058	0.18362	2.18e-141	2.79e-138
ENSGALG00000053318		38.1662	4.9349	0.859353	1.56e-11	2.05e-10
ENSGALG00000009730	SLC38A4	8.71379	4.95189	1.39784	5.59e-08	4.66e-07
ENSGALG00000034305		19.6304	14.0761	11.1813	6.45e-06	3.73e-05

## Sheet: DEGs between OE day 0 VS day 5
		baseMean	log2FoldChange	lfcSE	pvalue	padj
ENSGALG00000052797		4086.99	-26.2459	3.56919	7.1e-14	4.93e-13
ENSGALG00000041352		82.6495	-18.2464	7.47365	3.58e-07	1.29e-06
ENSGALG00000047898		10.9061	-5.65857	1.50008	2.21e-09	1.01e-08
ENSGALG00000049428		10.896	-4.56535	1.63984	1.14e-07	4.37e-07
ENSGALG00000009026	CFAP69	21.4119	-4.43618	1.78209	2.62e-07	9.58e-07
ENSGALG00000048837		74.3089	-3.88716	0.487556	1.19e-19	1.34e-18
ENSGALG00000013253	INSRR	11.8228	-3.83667	1.48157	4.79e-07	1.7e-06
ENSGALG00000052123		7.05825	-3.54285	1.61008	1.7e-06	5.68e-06
ENSGALG00000054073		8.97052	-3.51722	1.88904	2.84e-06	9.2e-06
ENSGALG00000000417	SLC16A4	51.1783	-3.44385	0.476812	1.19e-16	1.04e-15
ENSGALG00000041906		31.7226	-3.43061	0.751859	9.44e-10	4.49e-09
ENSGALG00000050116		23.9588	-3.42419	0.644269	2.26e-11	1.27e-10
ENSGALG00000049537	gga-mir-363	19.0667	-3.31341	0.675702	2.51e-10	1.26e-09
ENSGALG00000006812	TTC36	24.5315	-3.25879	0.715984	1.53e-09	7.14e-09
ENSGALG00000050299		16.15	-3.20601	1.10511	6.88e-07	2.4e-06
ENSGALG00000049284		10.0493	-3.19035	1.47085	3.49e-06	1.12e-05
ENSGALG00000041295	EN2	15.6874	-3.15275	1.92223	6.49e-06	2.02e-05
ENSGALG00000029940	IL1B	57.7814	-3.14017	0.427123	1.2e-16	1.05e-15
ENSGALG00000005299	ANXA7	6.72586	-3.07745	1.79745	7.25e-06	2.24e-05
ENSGALG00000007047	GAL	27.5725	-3.04461	0.812882	7.16e-08	2.8e-07
ENSGALG00000025687		63.6996	-3.0303	0.374063	5.03e-19	5.38e-18
ENSGALG00000042782		170.372	-3.01971	0.269284	3.87e-32	1.07e-30
ENSGALG00000025649		25.2173	-3.012	0.499965	1.32e-12	8.26e-12
ENSGALG00000021529	GP1BB	1239.81	-2.98392	0.212412	1.05e-47	7.05e-46
ENSGALG00000050699		102.643	-2.97258	0.32299	4.11e-23	6.12e-22
ENSGALG00000025339		26.0977	-2.96612	0.478594	5.29e-13	3.41e-12
ENSGALG00000024504		52.1731	-2.93838	0.352622	9.85e-20	1.12e-18
ENSGALG00000004112	FUCA1	11.9402	-2.93739	1.48924	7.86e-06	2.42e-05
ENSGALG00000006584		8109.65	-2.91596	0.208913	4.57e-47	2.95e-45
ENSGALG00000048776		3681.6	-2.89736	0.239914	2.32e-36	8.39e-35
ENSGALG00000046684		29.7575	-2.87801	0.913145	7.62e-07	2.64e-06
ENSGALG00000008998	FAM179A	205.635	-2.835	0.264641	1.69e-29	3.94e-28
ENSGALG00000017843		32.1464	-2.81154	0.571365	9.79e-10	4.65e-09
ENSGALG00000049958		8.57513	-2.79583	1.24837	7.61e-06	2.35e-05
ENSGALG00000001080	NR5A1	34.1028	-2.79114	0.616534	6.43e-09	2.8e-08
ENSGALG00000019768	ACSF2	888.047	-2.77467	0.2508	4.33e-31	1.13e-29
ENSGALG00000021931	SNORA73	178.649	-2.76705	0.285441	7.14e-25	1.22e-23
ENSGALG00000049091		14.0969	-2.74225	0.926665	1.87e-06	6.2e-06
ENSGALG00000054143		1148.03	-2.73925	0.173094	5.72e-59	6.87e-57
ENSGALG00000049406		26.9278	-2.72219	0.787807	4.67e-07	1.66e-06
ENSGALG00000052867	CABP4	7.71332	-2.72003	1.66966	1.63e-05	4.83e-05
ENSGALG00000040355	TCF24	72.26	-2.69113	0.321633	1.52e-19	1.7e-18
ENSGALG00000047956		666.264	-2.69084	0.253945	8.86e-29	1.97e-27
ENSGALG00000054776		144.171	-2.67279	0.352398	8.55e-17	7.56e-16
ENSGALG00000005293	GNG13	25.106	-2.65042	0.883844	2.18e-06	7.16e-06
ENSGALG00000045232		223.096	-2.64578	0.30355	8.59e-21	1.05e-19
ENSGALG00000052849		62.7526	-2.63947	0.471866	4.85e-11	2.63e-10
ENSGALG00000021750	SNORD58	28.2597	-2.636	0.478326	7.73e-11	4.09e-10
ENSGALG00000046338	PYY	153.219	-2.63289	0.353652	2.75e-16	2.33e-15
ENSGALG00000046788		8.75433	-2.62487	0.994013	5.58e-06	1.75e-05
ENSGALG00000049262		495.444	-2.61994	0.252747	1.22e-27	2.49e-26
ENSGALG00000027517	gga-mir-3064	1572.88	-2.61868	0.191057	3.45e-45	2e-43
ENSGALG00000046030		64.4273	-2.60965	0.328311	5.91e-18	5.8e-17
ENSGALG00000037740	QRFPR	81.1042	-2.5948	0.388974	7.39e-14	5.12e-13
ENSGALG00000039585		7.09062	-2.58787	1.64783	2.25e-05	6.56e-05
ENSGALG00000048533		17.6048	-2.58484	0.678854	2.1e-07	7.77e-07
ENSGALG00000024938	SNORD58	34.1608	-2.58482	0.384889	5.62e-14	3.93e-13
ENSGALG00000010719	NEIL3	50.7198	-2.57208	0.550309	6.27e-09	2.73e-08
ENSGALG00000047394		13.9712	-2.54822	1.03173	9.86e-06	3.01e-05
ENSGALG00000054409		105.89	-2.54179	0.2965	3.96e-20	4.59e-19
ENSGALG00000038748	RSRP1	5177.13	-2.53732	0.139049	1.03e-76	2.18e-74
ENSGALG00000050888		253.9	-2.53169	0.500001	1.08e-09	5.13e-09
ENSGALG00000003076	FASLG	83.6472	-2.51172	0.541667	8.79e-09	3.77e-08
ENSGALG00000006834	CPB1	9.65615	-2.51049	0.911771	6.02e-06	1.89e-05
ENSGALG00000052545		26.1084	-2.50726	1.48422	2.77e-05	7.97e-05
ENSGALG00000051419		1257.4	-2.49773	0.211195	1.39e-34	4.51e-33
ENSGALG00000039489	5_8S_rRNA	224.743	-2.49024	0.364042	3.1e-14	2.22e-13
ENSGALG00000051829		618.239	-2.4848	0.250578	1.7e-25	3.04e-24
ENSGALG00000003841		1663.68	-2.47687	0.158031	1.26e-57	1.43e-55
ENSGALG00000028681		524.554	-2.46958	0.232394	1.15e-28	2.53e-27
ENSGALG00000052425	BATF3	71.5283	-2.46548	0.352943	1.21e-14	8.96e-14
ENSGALG00000030803		70.2233	-2.45866	0.354048	1.64e-14	1.2e-13
ENSGALG00000048440		48.1377	-2.4408	0.466663	5.94e-10	2.88e-09
ENSGALG00000003193	CRABP-I	99.5335	-2.42991	0.327257	5.46e-16	4.51e-15
ENSGALG00000017819	SNORA71	60.4472	-2.42703	0.310557	2.76e-17	2.54e-16
ENSGALG00000025635	SNORD54	23.2643	-2.42459	0.48167	1.69e-09	7.83e-09
ENSGALG00000050318		4.94462	-2.40237	1.50971	3.69e-05	0.000104519
ENSGALG00000026038	ERI2	2283.1	-2.38988	0.245946	1.55e-24	2.56e-23
ENSGALG00000007976		172.255	-2.38769	0.250316	8.76e-24	1.37e-22
ENSGALG00000012985	SLC6A13	72.7233	-2.37816	0.447063	4.4e-10	2.16e-09
ENSGALG00000009965	MPL	449.323	-2.35729	0.227514	2.5e-27	5.01e-26
ENSGALG00000047906		14.3564	-2.35689	1.17222	3.46e-05	9.85e-05
ENSGALG00000009963	LYZ	6.25597	-2.35686	1.07528	2.77e-05	7.98e-05
ENSGALG00000032606		24.4362	-2.35614	0.561296	9.03e-08	3.49e-07
ENSGALG00000051529		19.7658	-2.3476	0.591728	2.3e-07	8.47e-07
ENSGALG00000016364	ALKAL2	15.8525	-2.34411	0.81066	7.12e-06	2.21e-05
ENSGALG00000049957		179.595	-2.34318	0.469665	2.62e-09	1.19e-08
ENSGALG00000033786	MIXL1	23.0344	-2.33612	0.64078	7.63e-07	2.65e-06
ENSGALG00000039900		21.2976	-2.33146	0.54608	7.19e-08	2.81e-07
ENSGALG00000020876	AOX2	40.126	-2.33107	0.605258	3.72e-07	1.34e-06
ENSGALG00000024871		15.1332	-2.31603	0.605549	4.28e-07	1.53e-06
ENSGALG00000054134		43.2817	-2.30615	0.532953	6.05e-08	2.38e-07
ENSGALG00000024758		23.5813	-2.29955	0.499515	1.83e-08	7.6e-08
ENSGALG00000027484	C20orf85	16.0571	-2.28699	0.745625	5.33e-06	1.68e-05
ENSGALG00000025513	gga-mir-1598	8.52499	-2.2775	0.860182	1.55e-05	4.61e-05
ENSGALG00000048653		44.5981	-2.25525	0.388033	3.89e-11	2.13e-10
ENSGALG00000008100	RAPSN	80.8075	-2.24384	0.361954	3.88e-12	2.32e-11
ENSGALG00000052240		967.315	-2.23626	0.202798	2.57e-30	6.42e-29
ENSGALG00000003058		129.535	-2.22872	0.321574	3.2e-14	2.29e-13
ENSGALG00000033320		24587.1	-2.22765	0.147043	7.5e-54	6.75e-52
ENSGALG00000018264	gga-let-7d	70.2271	-2.22544	0.296911	5.33e-16	4.41e-15
ENSGALG00000003952	RBPJL	19.0014	-2.22287	0.872859	2.28e-05	6.64e-05
ENSGALG00000049853	VAMP1	108.484	-2.21436	0.285574	7.5e-17	6.66e-16
ENSGALG00000049024	CD7	25.57	-2.20467	0.727637	7.59e-06	2.34e-05
ENSGALG00000009725	SCG5	285.249	-2.20397	0.280813	3.65e-17	3.33e-16
ENSGALG00000035464		54.6588	-2.19813	0.407751	4.77e-10	2.33e-09
ENSGALG00000052214		22.2861	-2.19032	0.724776	8.1e-06	2.49e-05
ENSGALG00000026081	RBM38	27.5432	-2.1893	0.821108	1.97e-05	5.77e-05
ENSGALG00000006306	UROC1	45.9545	-2.18569	0.571847	6.24e-07	2.19e-06
ENSGALG00000035365		1002.94	-2.18233	0.123369	5.61e-72	1e-69
ENSGALG00000042548	LRRC6	18.1674	-2.18158	0.676403	4.65e-06	1.47e-05
ENSGALG00000045172	FAM166A	21.5968	-2.17122	0.572928	7.32e-07	2.55e-06
ENSGALG00000020647	LDLRAD1	385.426	-2.16878	0.237752	7.39e-22	9.94e-21
ENSGALG00000024609	SNORD73	52.1651	-2.16364	0.314491	5.33e-14	3.74e-13
ENSGALG00000027314	SAXO1	62.2682	-2.15828	0.457212	1.55e-08	6.48e-08
ENSGALG00000036725	ASCL3	225.383	-2.15828	0.255516	2.99e-19	3.25e-18
ENSGALG00000008918	LAMP5	85.1413	-2.14716	0.36217	2.55e-11	1.42e-10
ENSGALG00000047176		46.8676	-2.1438	0.484043	6.03e-08	2.37e-07
ENSGALG00000005790		48.4673	-2.1379	0.46794	3.29e-08	1.33e-07
ENSGALG00000050200		34.247	-2.137	0.874924	3.69e-05	0.000104519
ENSGALG00000013575	IFI6	37.5297	-2.13122	0.572671	1.05e-06	3.59e-06
ENSGALG00000037051		34292	-2.12624	0.127133	1.08e-64	1.62e-62
ENSGALG00000052858		103.748	-2.12144	0.573894	1.18e-06	4.01e-06
ENSGALG00000053045		115.949	-2.114	0.289918	3.15e-15	2.45e-14
ENSGALG00000050542		25.7494	-2.10495	0.57507	1.4e-06	4.74e-06
ENSGALG00000009640	CHRM5	21.3267	-2.10052	0.533582	5.13e-07	1.81e-06
ENSGALG00000043672	STAB1	316.094	-2.09401	0.259009	7.06e-18	6.85e-17
ENSGALG00000050980		890.161	-2.09343	0.232979	3.04e-21	3.86e-20
ENSGALG00000010323	BATF	325.762	-2.07996	0.247119	4.59e-19	4.92e-18
ENSGALG00000006189	CRYGN	85.5953	-2.07946	0.341086	1.08e-11	6.23e-11
ENSGALG00000026488	SNORD42	14.2535	-2.0787	0.565467	1.43e-06	4.81e-06
ENSGALG00000051812		258.922	-2.07259	0.279361	1.35e-15	1.07e-14
ENSGALG00000009687	KCNK2	178.448	-2.06616	0.28565	5.4e-15	4.12e-14
ENSGALG00000010909	PRKG2	53.9359	-2.06342	0.403229	2.81e-09	1.27e-08
ENSGALG00000050863		63.1805	-2.06089	0.453172	4.41e-08	1.75e-07
ENSGALG00000017392	SPDYA	134.348	-2.05049	0.256891	1.79e-17	1.68e-16
ENSGALG00000001620		393.419	-2.04828	0.221465	2.99e-22	4.17e-21
ENSGALG00000008629	MRC1	32.0682	-2.04757	0.663902	1.05e-05	3.2e-05
ENSGALG00000026621		41.3286	-2.04663	0.390233	1.51e-09	7.04e-09
ENSGALG00000027520		547.913	-2.04145	0.204741	2.79e-25	4.92e-24
ENSGALG00000026888		92.3378	-2.03331	0.257146	3.38e-17	3.09e-16
ENSGALG00000049477		35.5665	-2.02817	0.484775	2.32e-07	8.55e-07
ENSGALG00000025695	SCARNA13	39.6916	-2.02654	0.367775	3.77e-10	1.86e-09
ENSGALG00000047143		736.381	-2.02478	0.184375	6.77e-30	1.62e-28
ENSGALG00000047734		35.1647	-2.02319	0.449811	6.07e-08	2.38e-07
ENSGALG00000030088		16.748	-2.02285	0.68431	1.62e-05	4.8e-05
ENSGALG00000054915		2036.37	-2.01812	0.197354	2.19e-26	4.18e-25
ENSGALG00000005318	OVCH2	176.465	-2.00829	0.313907	1.92e-12	1.18e-11
ENSGALG00000052175		43.7125	-2.0081	0.348594	9.52e-11	4.98e-10
ENSGALG00000029140	CRABP2	37.2381	-2.00194	0.413813	1.31e-08	5.53e-08
ENSGALG00000054693		125.867	-2	0.326926	1.15e-11	6.57e-11
ENSGALG00000048062		65.1889	-1.99863	0.416068	1.56e-08	6.52e-08
ENSGALG00000053871		1761.97	-1.9971	0.255424	7.38e-17	6.56e-16
ENSGALG00000015628	MSANTD1	10.0947	-1.99061	1.12841	0.0001357	0.000358679
ENSGALG00000049996	OVOL1	62.4747	-1.9893	0.345499	1.01e-10	5.28e-10
ENSGALG00000015441	CD247	237.029	-1.98869	0.234804	3.58e-19	3.86e-18
ENSGALG00000017850		95.0488	-1.98833	0.279735	1.59e-14	1.17e-13
ENSGALG00000049733		593.849	-1.98528	0.156964	1.86e-38	7.42e-37
ENSGALG00000023818	HSPB9	380.518	-1.98501	0.154467	1.38e-39	5.82e-38
ENSGALG00000006471	SLCO2A1	13.4925	-1.98345	0.974575	0.000114982	0.000306791
ENSGALG00000055124		463.974	-1.98339	0.200707	7.68e-25	1.3e-23
ENSGALG00000025541		69.7438	-1.97572	0.25995	4.22e-16	3.52e-15
ENSGALG00000027422	gga-mir-125b-1	16.6906	-1.96872	0.445002	9.68e-08	3.72e-07
ENSGALG00000015006	MAB21L3	165.283	-1.9634	0.302597	1.18e-12	7.37e-12
ENSGALG00000023936		16.2789	-1.96043	0.853952	8.66e-05	0.000234945
ENSGALG00000042151		955.471	-1.95987	0.218347	4.43e-21	5.51e-20
ENSGALG00000048089		475.554	-1.95539	0.21601	2.23e-21	2.87e-20
ENSGALG00000055112		1097.88	-1.94979	0.104726	4.17e-79	9.73e-77
ENSGALG00000040101		1180.94	-1.94654	0.230356	4.62e-19	4.95e-18
ENSGALG00000051345		169.532	-1.94615	0.37266	2.16e-09	9.88e-09
ENSGALG00000047056		67.45	-1.94325	0.322733	2.35e-11	1.31e-10
ENSGALG00000054738		71.6232	-1.94291	0.271366	1.21e-14	8.97e-14
ENSGALG00000049140		30.6106	-1.93442	0.672948	2.65e-05	7.66e-05
ENSGALG00000017831	SNORD36	37.6349	-1.9323	0.377148	3.72e-09	1.66e-08
ENSGALG00000037744	CACNA1S	74.3515	-1.93073	0.382331	5.45e-09	2.4e-08
ENSGALG00000015379	TAGLN3	25.3316	-1.92682	0.534904	2.84e-06	9.19e-06
ENSGALG00000046686		200.937	-1.92651	0.261985	3.03e-15	2.35e-14
ENSGALG00000048570		728.925	-1.92471	0.31923	2.33e-11	1.31e-10
ENSGALG00000011360	PRKAG3	7.79813	-1.91972	1.42589	0.000134984	0.000357024
ENSGALG00000053844		75.6163	-1.91576	0.337068	1.83e-10	9.31e-10
ENSGALG00000010507	FCRL4	38.0649	-1.91414	0.627251	1.73e-05	5.11e-05
ENSGALG00000017857		42.9748	-1.91371	0.35635	1.06e-09	5e-09
ENSGALG00000026015		15.1434	-1.91196	0.696599	3.97e-05	0.00011184
ENSGALG00000053866		47.7355	-1.90209	0.382568	8.64e-09	3.71e-08
ENSGALG00000027147		411.198	-1.90115	0.255922	1.82e-15	1.44e-14
ENSGALG00000003774	ATP13A2	12760	-1.89924	0.190236	3.31e-25	5.79e-24
ENSGALG00000025576	gga-mir-1715	67.4208	-1.89845	0.331282	1.46e-10	7.46e-10
ENSGALG00000011623	ADAMTS3	295.43	-1.89694	0.262117	7.6e-15	5.74e-14
ENSGALG00000012285	BAIAP2L2	51.5254	-1.89224	0.347535	7.4e-10	3.56e-09
ENSGALG00000041978	K123	76.0516	-1.89102	0.359591	2.02e-09	9.3e-09
ENSGALG00000048536		37.7213	-1.88575	0.501115	1.77e-06	5.89e-06
ENSGALG00000054900		32.0876	-1.87804	0.561081	7.75e-06	2.39e-05
ENSGALG00000020316	IL13RA2	231.621	-1.87713	0.166062	2.48e-31	6.59e-30
ENSGALG00000017845		36.4568	-1.87309	0.424771	1.31e-07	4.98e-07
ENSGALG00000051209		298.044	-1.86865	0.280107	4.3e-13	2.8e-12
ENSGALG00000045505		58.7843	-1.86533	0.436862	2.46e-07	9.03e-07
ENSGALG00000047693		69.0286	-1.86531	0.285539	1.09e-12	6.85e-12
ENSGALG00000036021	MTMR7	42.4469	-1.85752	0.454813	5.45e-07	1.92e-06
ENSGALG00000035332		26.943	-1.85712	0.613178	2.2e-05	6.41e-05
ENSGALG00000025389		48.95	-1.85342	0.324489	1.8e-10	9.12e-10
ENSGALG00000025337	SNORD100	15.9109	-1.85114	0.648611	3.63e-05	0.000102942
ENSGALG00000021314	PLA2G10	181.163	-1.84982	0.208695	1.52e-20	1.81e-19
ENSGALG00000030129		20.9596	-1.84651	0.556737	9.37e-06	2.86e-05
ENSGALG00000055019		18.304	-1.84403	0.662971	4.49e-05	0.000125952
ENSGALG00000053351		13.3469	-1.84329	1.33641	0.000188471	0.000489325
ENSGALG00000052696		97.1203	-1.84312	0.282548	1.22e-12	7.62e-12
ENSGALG00000023953		71.4417	-1.84311	0.382448	2.11e-08	8.69e-08
ENSGALG00000054277		20.7527	-1.83876	0.582967	1.6e-05	4.74e-05
ENSGALG00000038141	NCF4	34.7534	-1.83266	0.431645	2.96e-07	1.08e-06
ENSGALG00000006728	SLC5A1	1311.6	-1.8303	0.219189	1.37e-18	1.41e-17
ENSGALG00000009973	SLC3A1	796.854	-1.82882	0.211809	1.21e-19	1.36e-18
ENSGALG00000053469		156.652	-1.82685	0.341217	1.41e-09	6.6e-09
ENSGALG00000003914	CALR3	95.8084	-1.82288	0.304408	3.75e-11	2.06e-10
ENSGALG00000014011	LRMP	2031.29	-1.81715	0.110255	1.17e-62	1.59e-60
ENSGALG00000012068		216.867	-1.81661	0.241585	1.1e-15	8.79e-15
ENSGALG00000003319	ADAP2	192.977	-1.81586	0.247875	4.7e-15	3.6e-14
ENSGALG00000036683	PNPO	1485.62	-1.81338	0.113734	7.35e-59	8.76e-57
ENSGALG00000049122		125.337	-1.81335	0.30257	3.72e-11	2.04e-10
ENSGALG00000004257	TSPAN15	13.2244	-1.8133	0.808655	0.000158294	0.00041506
ENSGALG00000012464	SOUL	4.76613	-1.81265	1.38958	0.000184572	0.000479821
ENSGALG00000047357		41.8067	-1.81121	0.473312	1.7e-06	5.68e-06
ENSGALG00000009792		219.163	-1.81056	0.207861	6.42e-20	7.35e-19
ENSGALG00000036263		2912.21	-1.80703	0.154021	1.99e-33	6e-32
ENSGALG00000039336	OTX5	411.278	-1.80635	0.240816	1.29e-15	1.03e-14
ENSGALG00000033075	SNORA51	37.2698	-1.8062	0.437744	5.23e-07	1.85e-06
ENSGALG00000040113	SFT2D3	567.589	-1.80411	0.271204	5.61e-13	3.61e-12
ENSGALG00000006375	TM4SF19	62.1072	-1.80278	0.363281	1.15e-08	4.85e-08
ENSGALG00000054260		315.806	-1.79989	0.234898	3.79e-16	3.18e-15
ENSGALG00000010540	TTC39A	61.6249	-1.7919	0.418733	2.84e-07	1.04e-06
ENSGALG00000000109	AFMID	2931.24	-1.79014	0.155026	1.79e-32	5.05e-31
ENSGALG00000037479	IGSF21	6.82875	-1.7892	1.40153	0.000189883	0.000492753
ENSGALG00000050012		190.971	-1.78764	0.218707	6.52e-18	6.37e-17
ENSGALG00000008845	HAO1	55.2257	-1.78463	0.341587	3.1e-09	1.4e-08
ENSGALG00000035029		4881.7	-1.78389	0.154283	1.52e-32	4.31e-31
ENSGALG00000027949		13.6622	-1.7809	0.632857	5.03e-05	0.000140596
ENSGALG00000047805		100.884	-1.77971	0.353269	8.26e-09	3.55e-08
ENSGALG00000047155		262.939	-1.77747	0.295907	3.7e-11	2.03e-10
ENSGALG00000002771	CRIP1	9.54903	-1.77549	1.12856	0.000299103	0.000755359
ENSGALG00000049424		156.307	-1.77093	0.268615	8.96e-13	5.67e-12
ENSGALG00000047206		207.205	-1.76999	0.286939	1.39e-11	7.91e-11
ENSGALG00000052620		69.9126	-1.7679	0.364569	2.18e-08	8.96e-08
ENSGALG00000017493		1013.26	-1.76729	0.134056	2.75e-41	1.26e-39
ENSGALG00000019934		126.104	-1.76081	0.277921	4.92e-12	2.91e-11
ENSGALG00000025367	gga-mir-1798	5.45325	-1.75987	0.813157	0.000217216	0.000559177
ENSGALG00000037983	LUC7L	6953.21	-1.75584	0.189817	5.39e-22	7.35e-21
ENSGALG00000049279		18.2351	-1.75507	0.720955	0.000135083	0.000357167
ENSGALG00000044020		397.081	-1.75395	0.22671	2.34e-16	1.99e-15
ENSGALG00000025948		257.324	-1.75204	0.232001	9.78e-16	7.88e-15
ENSGALG00000004804		13.4999	-1.75052	0.70754	0.000126098	0.00033484
ENSGALG00000053976	gga-mir-1454	18.591	-1.74732	0.602377	4.41e-05	0.000123937
ENSGALG00000010119	CDKL2	106.659	-1.74605	0.318295	8.22e-10	3.94e-09
ENSGALG00000037692		1125.68	-1.74518	0.167024	3.75e-27	7.44e-26
ENSGALG00000001840	TEK	47.8308	-1.74328	0.322477	1.28e-09	6.04e-09
ENSGALG00000011489	TBXT	173.059	-1.73483	0.380207	9.22e-08	3.56e-07
ENSGALG00000048574		274.321	-1.73344	0.254254	2.11e-13	1.41e-12
ENSGALG00000030434	gga-mir-130b	21.4493	-1.7329	0.471374	3.69e-06	1.18e-05
ENSGALG00000027018		99.9962	-1.73142	0.330589	3.27e-09	1.47e-08
ENSGALG00000049499		5.32967	-1.7282	1.10051	0.000361247	0.00090309
ENSGALG00000040621	IL18R1	111.967	-1.72157	0.397538	2.71e-07	9.9e-07
ENSGALG00000002594	TFPI	12421.5	-1.72135	0.136406	4.5e-38	1.74e-36
ENSGALG00000008889	TTC14	1746.07	-1.71891	0.178329	1.43e-23	2.2e-22
ENSGALG00000048961		36.0832	-1.71886	0.49054	7.14e-06	2.21e-05
ENSGALG00000054443		13529.9	-1.71862	0.14457	3.72e-34	1.18e-32
ENSGALG00000048096		24.5895	-1.71732	1.03562	0.000387296	0.000964615
ENSGALG00000050629		125.944	-1.71478	0.249218	1.42e-13	9.57e-13
ENSGALG00000052512	NPS	225.91	-1.71027	0.259402	1.01e-12	6.39e-12
ENSGALG00000001696	SAG	42.655	-1.71027	0.392897	2.52e-07	9.26e-07
ENSGALG00000016724	RGN	61.3255	-1.70915	0.355973	3.16e-08	1.28e-07
ENSGALG00000047468		410.493	-1.70654	0.232135	4.85e-15	3.71e-14
ENSGALG00000047653		68.5557	-1.70319	0.326509	3.9e-09	1.74e-08
ENSGALG00000025602		46.0407	-1.69659	0.3451	1.85e-08	7.66e-08
ENSGALG00000028810	CHCHD10	3733.88	-1.69566	0.134097	3.41e-38	1.34e-36
ENSGALG00000030502	ADAMTS4	109.793	-1.69322	0.272259	1.19e-11	6.82e-11
ENSGALG00000039742	CYP21A1	1837.16	-1.69056	0.143689	1.68e-33	5.11e-32
ENSGALG00000043283	LGI2	46.4664	-1.68951	0.444121	2.56e-06	8.34e-06
ENSGALG00000041098		34.7083	-1.68627	0.548943	3.23e-05	9.22e-05
ENSGALG00000017874		4.86102	-1.68556	1.08615	0.000426299	0.00105669
ENSGALG00000013420	FOXM1	5124.48	-1.6851	0.14178	4.09e-34	1.28e-32
ENSGALG00000029002		46.9106	-1.67987	0.464964	5.38e-06	1.7e-05
ENSGALG00000050419		43.2749	-1.67793	0.423382	1.41e-06	4.76e-06
ENSGALG00000008398	MPP4	130.406	-1.67616	0.31253	1.88e-09	8.7e-09
ENSGALG00000000249	GH	58.0067	-1.67437	0.362101	8.02e-08	3.12e-07
ENSGALG00000002632	CALCRL	2933.26	-1.67316	0.224336	2.33e-15	1.83e-14
ENSGALG00000053561		56.2398	-1.67282	0.42777	1.77e-06	5.88e-06
ENSGALG00000007386	LUC7L3	7534.09	-1.67262	0.137696	1.76e-35	6.15e-34
ENSGALG00000007594	ASB12	242.414	-1.6713	0.25436	1.28e-12	8e-12
ENSGALG00000006936	WDR6	1821.91	-1.66894	0.162602	2.98e-26	5.61e-25
ENSGALG00000017863		34.6469	-1.66719	0.418254	1.33e-06	4.48e-06
ENSGALG00000037493		625.365	-1.66637	0.192383	1.31e-19	1.46e-18
ENSGALG00000054240		25.1767	-1.66615	0.455257	4.7e-06	1.49e-05
ENSGALG00000016564	PTK2B	209.643	-1.66568	0.220201	1.06e-15	8.49e-15
ENSGALG00000027320		58.4381	-1.66381	0.298575	6.06e-10	2.94e-09
ENSGALG00000031205	GNGT2	178.607	-1.66183	0.271209	2.26e-11	1.27e-10
ENSGALG00000007525		292.336	-1.65917	0.237843	8.14e-14	5.62e-13
ENSGALG00000001565	C5	524.679	-1.65881	0.184962	8.68e-21	1.06e-19
ENSGALG00000024621	SNORD72	19.896	-1.65746	0.497128	1.52e-05	4.52e-05
ENSGALG00000017839	SNORA62	35.6463	-1.65626	0.361839	1.04e-07	4e-07
ENSGALG00000017833		113.258	-1.65506	0.283696	1.36e-10	6.99e-10
ENSGALG00000010078	GLP1R	347.481	-1.6429	0.152685	1.64e-28	3.58e-27
ENSGALG00000044849		38.0722	-1.64233	0.378527	3.18e-07	1.15e-06
ENSGALG00000050736		20.2805	-1.6399	0.480573	1.22e-05	3.7e-05
ENSGALG00000025852	gga-mir-6677	6.57824	-1.63819	0.869327	0.000484835	0.00119078
ENSGALG00000041709	gga-mir-1608	18.5101	-1.63744	0.535241	3.88e-05	0.000109471
ENSGALG00000018352	gga-mir-7-1	11.4961	-1.63611	0.564311	6.24e-05	0.00017253
ENSGALG00000032684		611.006	-1.63475	0.181023	5.17e-21	6.4e-20
ENSGALG00000030153		1098.3	-1.63191	0.112566	4.12e-49	3.04e-47
ENSGALG00000054793	NCAPH2	7239.78	-1.63183	0.0870394	6.68e-80	1.63e-77
ENSGALG00000043314	SNORA75	50.786	-1.63068	0.339712	3.83e-08	1.53e-07
ENSGALG00000005506	HESX1	1155.51	-1.62689	0.190934	4.81e-19	5.15e-18
ENSGALG00000048020		381.711	-1.62389	0.252305	3.43e-12	2.06e-11
ENSGALG00000004367	AWAT1	80.6704	-1.62079	0.290289	6.27e-10	3.03e-09
ENSGALG00000054974		113.675	-1.62017	0.361482	1.77e-07	6.6e-07
ENSGALG00000044083		114.466	-1.61863	0.282529	2.73e-10	1.36e-09
ENSGALG00000050772		10.3495	-1.61722	0.776541	0.000415362	0.00103133
ENSGALG00000017849	SNORD14	34.8341	-1.61495	0.377555	4.46e-07	1.59e-06
ENSGALG00000050984		29.4088	-1.61373	0.486738	1.83e-05	5.4e-05
ENSGALG00000053303		327.097	-1.61345	0.214366	1.57e-15	1.24e-14
ENSGALG00000051746		23.5048	-1.61331	0.621172	0.00014976	0.000393582
ENSGALG00000004568	CELA2A	74.6615	-1.61157	0.2907	8.01e-10	3.84e-09
ENSGALG00000028207		14.5373	-1.60759	0.819451	0.000505323	0.00123695
ENSGALG00000008902	GIPC2	65.9753	-1.60726	0.317075	1.05e-08	4.47e-08
ENSGALG00000002781	BRCA1	4544.3	-1.60573	0.172146	3.49e-22	4.83e-21
ENSGALG00000028438	CLK1	3188.25	-1.60544	0.127751	1.09e-37	4.13e-36
ENSGALG00000051083		513.476	-1.60383	0.155129	1.55e-26	2.98e-25
ENSGALG00000048462		368.696	-1.60269	0.236095	3.38e-13	2.22e-12
ENSGALG00000052798		12.8288	-1.60238	0.589024	0.000113349	0.000302633
ENSGALG00000001595	PHF19	14209	-1.60055	0.0960685	8.89e-64	1.29e-61
ENSGALG00000015692		422.88	-1.60026	0.221061	1.38e-14	1.02e-13
ENSGALG00000046950		191.054	-1.59852	0.229926	1.09e-13	7.41e-13
ENSGALG00000050752		489.947	-1.59562	0.131779	3.27e-35	1.11e-33
ENSGALG00000048460		5.0906	-1.59458	1.19013	0.000486912	0.00119552
ENSGALG00000043544		11.176	-1.59356	0.864879	0.000599975	0.00145295
ENSGALG00000051388		17.3228	-1.59352	0.661696	0.000247915	0.000633141
ENSGALG00000038575		99.4996	-1.59287	0.241552	1.29e-12	8.03e-12
ENSGALG00000054381	SNORD14	251.162	-1.59208	0.189444	1.4e-18	1.44e-17
ENSGALG00000025270	SNORA52	39.6773	-1.59166	0.385683	9.01e-07	3.1e-06
ENSGALG00000008206	TESC	86.0063	-1.59004	0.331698	4.35e-08	1.73e-07
ENSGALG00000043654		75.8861	-1.58467	0.995907	0.000667001	0.00160633
ENSGALG00000048223		28.0227	-1.58371	0.528442	5.5e-05	0.000153162
ENSGALG00000006402	NRROS	35.1762	-1.58252	0.529688	5.68e-05	0.000157808
ENSGALG00000041847		40.1862	-1.58209	0.409078	2.66e-06	8.65e-06
ENSGALG00000013748	CD226	70.5736	-1.58183	0.328284	3.93e-08	1.57e-07
ENSGALG00000026776		571.868	-1.58079	0.207501	8.29e-16	6.73e-15
ENSGALG00000055005		73.3712	-1.5788	0.400399	1.99e-06	6.56e-06
ENSGALG00000043763	SNORD18	10.5795	-1.57861	0.620836	0.00019164	0.000496911
ENSGALG00000027722		44.1962	-1.57435	0.686235	0.000335879	0.000842814
ENSGALG00000014528	ENO2	3695.43	-1.57334	0.209034	1.7e-15	1.34e-14
ENSGALG00000025418		70.4171	-1.57163	0.263663	7.63e-11	4.04e-10
ENSGALG00000049794		3060.49	-1.56938	0.168788	4.94e-22	6.76e-21
ENSGALG00000054405		488.846	-1.56935	0.18523	8.14e-19	8.52e-18
ENSGALG00000050709		4.98366	-1.56859	1.32596	0.000363217	0.000907732
ENSGALG00000049707	SNORD14	119.901	-1.56748	0.243667	3.94e-12	2.36e-11
ENSGALG00000035970		21.657	-1.5672	0.45751	1.43e-05	4.29e-05
ENSGALG00000026584		95.5197	-1.56633	0.397842	2.1e-06	6.92e-06
ENSGALG00000027351	LRRC71	250.657	-1.56476	0.20271	3.91e-16	3.27e-15
ENSGALG00000038396		46.5604	-1.56394	0.376219	8.51e-07	2.94e-06
ENSGALG00000052238		114.458	-1.56384	0.26161	7e-11	3.72e-10
ENSGALG00000045228		2084.37	-1.56291	0.119572	1.77e-40	7.91e-39
ENSGALG00000024266		120.698	-1.56226	0.278116	5.88e-10	2.86e-09
ENSGALG00000038110	DGKA	3868	-1.56188	0.120335	5.89e-40	2.55e-38
ENSGALG00000025590	SCARNA16	8.43854	-1.56173	0.831446	0.0006611	0.00159355
ENSGALG00000006565		64.7347	-1.55525	0.385506	1.46e-06	4.9e-06
ENSGALG00000053509	DDX11	2276.32	-1.55418	0.15463	3.28e-25	5.75e-24
ENSGALG00000050845		1731.35	-1.5526	0.171583	5.13e-21	6.37e-20
ENSGALG00000053936		286.47	-1.55037	0.146174	1.02e-27	2.1e-26
ENSGALG00000002431		87.893	-1.54875	0.353548	3.33e-07	1.21e-06
ENSGALG00000014719		1026.98	-1.54652	0.143033	1.11e-28	2.46e-27
ENSGALG00000021762	SNORD58	14.0998	-1.54638	0.582722	0.000161441	0.00042276
ENSGALG00000036447		180.488	-1.54638	0.312428	2.22e-08	9.13e-08
ENSGALG00000051962		8.02375	-1.54556	1.27397	0.000443494	0.0010956
ENSGALG00000011392	MSH4	2707.02	-1.53851	0.219877	8.96e-14	6.15e-13
ENSGALG00000031977	CACNG2	80.1654	-1.53447	0.310159	2.31e-08	9.48e-08
ENSGALG00000050470	OPN1LW	219.025	-1.53415	0.285924	2.56e-09	1.16e-08
ENSGALG00000007909	IQCH	108.805	-1.53353	0.269886	4.32e-10	2.12e-09
ENSGALG00000047209		556.683	-1.53168	0.171854	1.83e-20	2.17e-19
ENSGALG00000008702	OVOL2	24.0261	-1.52905	0.432409	1.08e-05	3.27e-05
ENSGALG00000004345	OIT3	2553.26	-1.52736	0.229504	9.8e-13	6.18e-12
ENSGALG00000053517	CDC26	4194.81	-1.52572	0.105766	1.42e-48	1.01e-46
ENSGALG00000053659		28.8199	-1.52505	0.945847	0.000869822	0.00205844
ENSGALG00000054963		89.9409	-1.52487	0.247301	2.38e-11	1.33e-10
ENSGALG00000051647		18.136	-1.52467	0.599107	0.000227865	0.000584438
ENSGALG00000017099	RASL11A	33.8373	-1.51939	0.435094	1.3e-05	3.9e-05
ENSGALG00000044816		89.7744	-1.51877	0.31411	4.21e-08	1.68e-07
ENSGALG00000046379		64.0753	-1.51599	0.32916	1.28e-07	4.88e-07
ENSGALG00000004111	GPR174	10.5007	-1.51487	0.840678	0.000853328	0.00202268
ENSGALG00000029298	F5	146.249	-1.51398	0.258602	1.64e-10	8.37e-10
ENSGALG00000002688	NME4	39.3592	-1.51341	0.502212	6.47e-05	0.000178479
ENSGALG00000050604		43.9091	-1.51196	0.436339	1.46e-05	4.35e-05
ENSGALG00000012790	DSP	22.5412	-1.51165	0.794412	0.000787622	0.00187883
ENSGALG00000052579		1078.07	-1.50988	0.18145	3.3e-18	3.3e-17
ENSGALG00000006792	VSTM2L	24.3562	-1.50815	0.554375	0.000152986	0.000401667
ENSGALG00000030000		70.4306	-1.50799	0.352108	5.7e-07	2e-06
ENSGALG00000044866		6374.83	-1.50643	0.236445	6.7e-12	3.92e-11
ENSGALG00000041008		1555.28	-1.50532	0.160336	2.38e-22	3.36e-21
ENSGALG00000051458		1396.39	-1.49774	0.188627	7.75e-17	6.88e-16
ENSGALG00000041948		74.6233	-1.49686	0.355068	7.85e-07	2.72e-06
ENSGALG00000035842	SLC37A2	3616.07	-1.49511	0.16624	9.46e-21	1.15e-19
ENSGALG00000008365	CHRM4	98.3271	-1.49498	0.283552	4.65e-09	2.06e-08
ENSGALG00000006407		9441.21	-1.49354	0.128216	9.61e-33	2.74e-31
ENSGALG00000031119		77.1554	-1.49317	0.31889	9.42e-08	3.63e-07
ENSGALG00000048236		1022.11	-1.49312	0.132538	7.97e-31	2.06e-29
ENSGALG00000054828		29.0967	-1.49302	0.523529	0.000111223	0.000297402
ENSGALG00000025614		59.992	-1.49273	0.290614	9.63e-09	4.11e-08
ENSGALG00000048847		618.482	-1.49272	0.315803	7.61e-08	2.97e-07
ENSGALG00000047951		18.9329	-1.48972	0.799211	0.000895902	0.00211643
ENSGALG00000009034	ALK	873.685	-1.48746	0.17933	4.31e-18	4.28e-17
ENSGALG00000030908		233.367	-1.48618	0.308913	5.13e-08	2.03e-07
ENSGALG00000052829	MAMDC4	15.2374	-1.4849	0.565171	0.000210897	0.000543867
ENSGALG00000010859	EPGN	166.828	-1.48359	0.241111	2.82e-11	1.57e-10
ENSGALG00000049665	BLEC3	62.4989	-1.48097	0.323233	1.57e-07	5.89e-07
ENSGALG00000054577		109.858	-1.47878	0.361761	1.42e-06	4.78e-06
ENSGALG00000042086		19.3255	-1.47816	0.565247	0.000222513	0.000571715
ENSGALG00000054823	SLC30A3	42.346	-1.47566	0.443318	2.6e-05	7.52e-05
ENSGALG00000009520	2020-03-01	211.404	-1.47321	0.222245	1.31e-12	8.19e-12
ENSGALG00000015483	PNISR	9049.83	-1.47278	0.189201	2.82e-16	2.39e-15
ENSGALG00000055086		2551.34	-1.4714	0.137955	6.25e-28	1.31e-26
ENSGALG00000038920		112.314	-1.46988	0.349624	8.85e-07	3.05e-06
ENSGALG00000027069	TSC22D4	1228.27	-1.4645	0.15894	1.32e-21	1.74e-20
ENSGALG00000011668	IL8L1	118.244	-1.46237	0.224409	2.84e-12	1.72e-11
ENSGALG00000051804		151.61	-1.45985	0.329791	3.38e-07	1.22e-06
ENSGALG00000050442		62.3626	-1.45979	0.348114	9.51e-07	3.27e-06
ENSGALG00000033441	COX14	1535.9	-1.45951	0.16178	7.86e-21	9.6e-20
ENSGALG00000051337		31.6457	-1.45524	0.413963	1.43e-05	4.27e-05
ENSGALG00000014555	C1H12ORF57	1702.92	-1.4504	0.123495	3.36e-33	9.96e-32
ENSGALG00000047573		175.325	-1.44911	0.220611	2.07e-12	1.27e-11
ENSGALG00000019233		16.3347	-1.4491	0.957426	0.00118571	0.00274902
ENSGALG00000044914	C11orf16	54.0236	-1.44843	0.446674	3.77e-05	0.000106505
ENSGALG00000054038		1136.36	-1.44825	0.161299	1.19e-20	1.42e-19
ENSGALG00000046747		46.6661	-1.44806	0.407596	1.27e-05	3.83e-05
ENSGALG00000032125		8.13951	-1.44581	0.877286	0.00123357	0.0028538
ENSGALG00000042748		937.383	-1.44512	0.106548	3.03e-43	1.57e-41
ENSGALG00000002579	RIMBP2	180.723	-1.44243	0.271693	4.31e-09	1.91e-08
ENSGALG00000054378	LRRC43	73.7325	-1.44203	0.312807	1.51e-07	5.69e-07
ENSGALG00000028341		126.079	-1.44141	0.335817	6.48e-07	2.26e-06
ENSGALG00000004123	PABPC1L	582.729	-1.44082	0.195265	6.79e-15	5.15e-14
ENSGALG00000048033	SNORD58	6.74265	-1.43577	0.761732	0.00108882	0.002539
ENSGALG00000035760	LENG8	5769.37	-1.43549	0.153594	4.07e-22	5.6e-21
ENSGALG00000030254	METAP1D	156.186	-1.43528	0.274018	6.44e-09	2.8e-08
ENSGALG00000004251	ARR3	78.3519	-1.43485	0.326604	4.19e-07	1.5e-06
ENSGALG00000053046		602.152	-1.43483	0.149276	3.2e-23	4.82e-22
ENSGALG00000024890	SNORD101	9.53055	-1.4331	0.696473	0.000862918	0.0020436
ENSGALG00000001169		100.252	-1.43186	0.330689	5.62e-07	1.97e-06
ENSGALG00000048954	DMP1	25.2125	-1.43126	0.652997	0.000683597	0.00164286
ENSGALG00000049542		10.7878	-1.43077	0.734393	0.00102573	0.00240233
ENSGALG00000040130		71.4745	-1.43023	0.324561	3.99e-07	1.43e-06
ENSGALG00000047494		58.6192	-1.42947	0.272104	6e-09	2.62e-08
ENSGALG00000017316	UCP3	140.038	-1.42808	0.29467	4.96e-08	1.96e-07
ENSGALG00000003885		12.3185	-1.42678	0.839476	0.00131838	0.0030343
ENSGALG00000041604	NPTXR	204.763	-1.42614	0.249621	4.59e-10	2.25e-09
ENSGALG00000039982	IRF5	198.338	-1.42545	0.236921	7.49e-11	3.97e-10
ENSGALG00000048830	EIF4EBP3	646.883	-1.42154	0.189227	2.58e-15	2.02e-14
ENSGALG00000021758	SNORD36	29.766	-1.42023	0.374486	5.52e-06	1.74e-05
ENSGALG00000046550		37.7103	-1.41915	0.461477	7.09e-05	0.00019457
ENSGALG00000050002	COLEC11	73.0695	-1.41903	0.372872	5.26e-06	1.66e-05
ENSGALG00000019690	WDR86	15.9452	-1.41806	0.650676	0.000734417	0.00175869
ENSGALG00000049304		110.32	-1.41652	0.237696	1.08e-10	5.64e-10
ENSGALG00000013406	EOGT	36.7532	-1.41524	0.507551	0.000170062	0.000444038
ENSGALG00000048095		30.8736	-1.41379	0.695039	0.000964356	0.00226583
ENSGALG00000046371		3999.17	-1.41229	0.149114	1.3e-22	1.87e-21
ENSGALG00000038951	RASSF1	7148.74	-1.40962	0.0848727	2.98e-63	4.24e-61
ENSGALG00000047525		71.5206	-1.4093	0.326198	6.21e-07	2.18e-06
ENSGALG00000051496		89.8444	-1.40877	0.232759	6.24e-11	3.33e-10
ENSGALG00000039480		38.5151	-1.40722	0.429597	3.8e-05	0.000107426
ENSGALG00000004309	GDAP1L1	166.075	-1.40482	0.281043	2.43e-08	9.95e-08
ENSGALG00000040832	CFD	251.677	-1.40315	0.22309	1.42e-11	8.08e-11
ENSGALG00000002009	FANCG	1476.5	-1.40118	0.0995208	2.53e-46	1.57e-44
ENSGALG00000053362		5.20724	-1.39891	1.34375	0.000452791	0.00111719
ENSGALG00000015084	IGSF11	15.5333	-1.39886	0.70836	0.00111874	0.00260425
ENSGALG00000040249	BHLHE22	68.6703	-1.39758	0.300204	1.36e-07	5.15e-07
ENSGALG00000021748		33.5557	-1.39716	0.350686	2.72e-06	8.82e-06
ENSGALG00000034174		661.673	-1.39571	0.205723	5.37e-13	3.46e-12
ENSGALG00000025751	NMRK2	1459.68	-1.39543	0.164269	9.48e-19	9.9e-18
ENSGALG00000047414		72.7262	-1.3948	0.368607	6.12e-06	1.91e-05
ENSGALG00000024298	ADAMTSL5	35.7667	-1.39338	0.569695	0.000449015	0.00110856
ENSGALG00000017811		44.3932	-1.39015	0.331892	1.17e-06	3.97e-06
ENSGALG00000003435	PGC	95.3115	-1.38909	0.276337	2.18e-08	8.98e-08
ENSGALG00000046375	SULT6B1	67.5612	-1.38849	0.341517	1.98e-06	6.54e-06
ENSGALG00000054059		12.2392	-1.38788	1.09748	0.00110915	0.00258305
ENSGALG00000042521	MPP3	785.152	-1.38768	0.214726	4.78e-12	2.84e-11
ENSGALG00000029346		1522.02	-1.38753	0.164477	1.59e-18	1.63e-17
ENSGALG00000026107		31.8883	-1.38534	0.318454	5.78e-07	2.03e-06
ENSGALG00000021766		23.2061	-1.38506	0.420434	3.8e-05	0.000107502
ENSGALG00000041778		924.722	-1.38488	0.117762	3.17e-33	9.42e-32
ENSGALG00000039084	EVI2A	46.1679	-1.38473	0.420583	3.83e-05	0.000108259
ENSGALG00000033780		238.142	-1.38372	0.285856	5.69e-08	2.24e-07
ENSGALG00000035368	CTRL	34.548	-1.38339	0.365731	6.35e-06	1.98e-05
ENSGALG00000003972	FAXDC2	725.59	-1.38234	0.16823	1.02e-17	9.75e-17
ENSGALG00000051479	CDK5	5038.32	-1.38103	0.135977	1.56e-25	2.8e-24
ENSGALG00000006627	UPB1	25.3755	-1.38044	0.608812	0.000703027	0.00168653
ENSGALG00000001189	NCF1C	41.0705	-1.38016	0.397934	2.09e-05	6.13e-05
ENSGALG00000039837	CCKBR	229.553	-1.37987	0.252476	2.11e-09	9.69e-09
ENSGALG00000025464		52.2027	-1.3798	0.298473	1.66e-07	6.22e-07
ENSGALG00000045873		106.642	-1.37784	0.282842	4.95e-08	1.96e-07
ENSGALG00000006376	TMC3	1672.06	-1.37573	0.17251	7.54e-17	6.69e-16
ENSGALG00000051848	KIF5A	81.0003	-1.37409	0.312648	4.87e-07	1.72e-06
ENSGALG00000029558		223.485	-1.37272	0.229731	1.09e-10	5.66e-10
ENSGALG00000006318	IL21R	20.8923	-1.37269	0.578154	0.00057003	0.0013844
ENSGALG00000017840		20.6292	-1.37238	0.511179	0.000260253	0.000662442
ENSGALG00000047893		219.142	-1.36916	0.309765	4.4e-07	1.57e-06
ENSGALG00000035568		168.616	-1.3689	0.229903	1.25e-10	6.44e-10
ENSGALG00000035476		1429.46	-1.36888	0.107162	1.2e-38	4.85e-37
ENSGALG00000010867	TACSTD2	60.8428	-1.3682	0.44751	8.75e-05	0.000237099
ENSGALG00000050575		4068.79	-1.36785	0.11111	4.16e-36	1.49e-34
ENSGALG00000003301	FAM167B	139.85	-1.36667	0.247815	1.65e-09	7.66e-09
ENSGALG00000006995	APOD	84.5131	-1.36478	0.330576	1.62e-06	5.4e-06
ENSGALG00000030652		9.03593	-1.36244	0.838628	0.00179991	0.00404823
ENSGALG00000050083	SYCP2L	19.2438	-1.36208	0.657551	0.0011003	0.00256392
ENSGALG00000055069		3223.17	-1.36111	0.0946262	3.5e-48	2.42e-46
ENSGALG00000033783	FER1L6	53.2398	-1.36086	0.390073	2.06e-05	6.02e-05
ENSGALG00000007479	SLC25A28	2385.99	-1.35838	0.146762	1.11e-21	1.47e-20
ENSGALG00000035293		36.2228	-1.35768	0.380571	1.55e-05	4.62e-05
ENSGALG00000028595	CCNO	246.294	-1.35745	0.246089	1.67e-09	7.76e-09
ENSGALG00000023886	ZNF804A	38.5063	-1.35717	0.518675	0.000328558	0.000826116
ENSGALG00000010435	RASGRP3	512.337	-1.35665	0.121508	3.21e-30	7.97e-29
ENSGALG00000010891	ABCB11	181.517	-1.35582	0.242311	1.07e-09	5.07e-09
ENSGALG00000009909	PRPH2	17.7815	-1.35554	0.860419	0.00186806	0.00418804
ENSGALG00000052658		699.112	-1.35429	0.171146	1.3e-16	1.13e-15
ENSGALG00000023692		33.6684	-1.3526	0.421078	5.53e-05	0.000153873
ENSGALG00000050368		295.338	-1.34972	0.217745	2.86e-11	1.59e-10
ENSGALG00000004247	MORN3	47.3543	-1.34856	0.453727	0.000121268	0.000322493
ENSGALG00000040264	C9H2ORF82	20.3588	-1.34838	0.656613	0.00119499	0.00276854
ENSGALG00000054593		119.659	-1.34789	0.208865	5.56e-12	3.27e-11
ENSGALG00000026179	FAM163B	11.2227	-1.34648	1.14371	0.00106177	0.00248024
ENSGALG00000054303		7.72806	-1.34639	0.88436	0.00193373	0.00432502
ENSGALG00000031423	DMRTA2	56.2907	-1.34557	0.260354	1.16e-08	4.91e-08
ENSGALG00000015263		27.5266	-1.3455	0.642793	0.00112554	0.00261932
ENSGALG00000053583	KMT5C	5627.05	-1.3452	0.128666	7.53e-27	1.47e-25
ENSGALG00000002775	FA2H	150.288	-1.345	0.253814	5.75e-09	2.52e-08
ENSGALG00000014962	CALHM6	21.8541	-1.34259	0.616938	0.000970762	0.00227989
ENSGALG00000027526	COL9A2	761.689	-1.34253	0.13493	1.37e-24	2.28e-23
ENSGALG00000050830	SV2A	127.338	-1.33988	0.275302	5.57e-08	2.2e-07
ENSGALG00000008593	ATP1B4	26.3057	-1.33891	0.576636	0.000721553	0.00172943
ENSGALG00000035850	CSAD	2972.16	-1.33688	0.14547	2.14e-21	2.76e-20
ENSGALG00000012181	RRH	3.83743	-1.33552	1.18271	0.000938826	0.00220875
ENSGALG00000003219	TMEM231	6103.24	-1.33419	0.135024	2.77e-24	4.5e-23
ENSGALG00000050532	B3GNT3	366.88	-1.33324	0.240679	1.56e-09	7.25e-09
ENSGALG00000013006	ROPN1L	93.4686	-1.33278	0.255754	9.53e-09	4.07e-08
ENSGALG00000002203	FGF18	100.882	-1.33087	0.239221	1.37e-09	6.41e-09
ENSGALG00000002015	SNCG	35.2534	-1.33006	0.451927	0.000140418	0.000370431
ENSGALG00000052207		25.6627	-1.32972	0.491686	0.000282696	0.000716172
ENSGALG00000050256	TRPT1	593.562	-1.32914	0.123175	2.14e-28	4.63e-27
ENSGALG00000004657	FBXO2	625.797	-1.32897	0.20921	1.12e-11	6.45e-11
ENSGALG00000025527	SNORD79	18.7832	-1.32844	0.476103	0.000222487	0.000571715
ENSGALG00000004336	INPPL1	56.7958	-1.32733	0.351243	7.53e-06	2.33e-05
ENSGALG00000025629		11.8471	-1.32727	0.59235	0.000897905	0.00212085
ENSGALG00000004562	HVCN1	620.731	-1.32704	0.196712	8.16e-13	5.17e-12
ENSGALG00000006958		525.402	-1.32569	0.248858	5.18e-09	2.28e-08
ENSGALG00000055059		5.55503	-1.32513	1.24335	0.000747417	0.00178796
ENSGALG00000053152		2652.73	-1.32241	0.110196	2.03e-34	6.46e-33
ENSGALG00000046212		175.722	-1.32105	0.284388	1.74e-07	6.5e-07
ENSGALG00000045165	C1orf109	904.873	-1.32097	0.144154	2.83e-21	3.6e-20
ENSGALG00000002798	WDR59	7530.63	-1.31953	0.144615	4.08e-21	5.11e-20
ENSGALG00000026687	PLCD4	79.3636	-1.31932	0.283031	1.61e-07	6.07e-07
ENSGALG00000047816		29.6421	-1.31709	0.575666	0.000839909	0.00199272
ENSGALG00000047563		121.322	-1.31709	0.783401	0.00214957	0.00477067
ENSGALG00000042418	CHEK1	3292.66	-1.31624	0.0757808	8.36e-69	1.36e-66
ENSGALG00000009699	CCNL1	6808.58	-1.31548	0.193516	5.87e-13	3.77e-12
ENSGALG00000050475		379.661	-1.31418	0.163559	5.29e-17	4.76e-16
ENSGALG00000039628	AFAP1L1	27.5825	-1.31112	0.467658	0.000226082	0.000579958
ENSGALG00000049230		115.525	-1.31084	0.245788	5.2e-09	2.29e-08
ENSGALG00000045436		190.217	-1.31033	0.272218	7.85e-08	3.06e-07
ENSGALG00000007124	POP5	3413.77	-1.30998	0.0944953	6.3e-45	3.62e-43
ENSGALG00000005628	COL9A3	27.0043	-1.30963	0.741624	0.00207437	0.00461777
ENSGALG00000045596		34.8766	-1.30957	0.538535	0.000616629	0.00149104
ENSGALG00000048303		12.081	-1.30924	0.879164	0.00228433	0.00504678
ENSGALG00000033941	RORC	190.303	-1.30899	0.299242	6.35e-07	2.22e-06
ENSGALG00000029644		153.795	-1.30697	0.299059	6.5e-07	2.27e-06
ENSGALG00000017272	VWF	99.0876	-1.30691	0.328561	3.57e-06	1.14e-05
ENSGALG00000030985	MYH7B	14.4411	-1.30519	0.590422	0.00103473	0.00242236
ENSGALG00000027202	gga-mir-6585	58.9269	-1.30497	0.263077	3.8e-08	1.52e-07
ENSGALG00000030706	MAP3K6	6381.57	-1.30476	0.147317	4.79e-20	5.54e-19
ENSGALG00000053105	RAP1GAP	308.649	-1.30302	0.178985	1.91e-14	1.4e-13
ENSGALG00000008979	TRMT61B	1637.46	-1.30295	0.0956717	1.86e-43	9.76e-42
ENSGALG00000017858		8.19174	-1.30244	0.687002	0.00182824	0.00410619
ENSGALG00000006473	PLXNA4	5.08049	-1.30203	0.953663	0.00212033	0.00470836
ENSGALG00000031186		287.759	-1.30192	0.237532	2.34e-09	1.07e-08
ENSGALG00000052593		174.439	-1.30183	0.264831	4.81e-08	1.91e-07
ENSGALG00000051767		323.28	-1.30159	0.201594	6.07e-12	3.57e-11
ENSGALG00000050232		90.7167	-1.30111	0.235167	1.75e-09	8.1e-09
ENSGALG00000025021	SNORD7	2.07267	-1.30102	1.12423	0.00126963	0.00293091
ENSGALG00000052689		535.813	-1.30102	0.199751	4.18e-12	2.49e-11
ENSGALG00000052134		40.4364	-1.30009	0.341901	7.41e-06	2.29e-05
ENSGALG00000047410		2424.61	-1.30006	0.0861746	1.21e-52	1.01e-50
ENSGALG00000003021	CHRNA5	73.4977	-1.30005	0.310424	1.49e-06	5e-06
ENSGALG00000033462		14944.2	-1.2997	0.278521	1.66e-07	6.22e-07
ENSGALG00000017832	SNORD24	15.2899	-1.29887	0.491903	0.000372441	0.000930207
ENSGALG00000049066		6.28495	-1.29835	1.2255	0.000839944	0.00199272
ENSGALG00000051151		22.2713	-1.29834	0.517	0.000524836	0.00128101
ENSGALG00000035641		2480.94	-1.2966	0.109148	9.17e-34	2.83e-32
ENSGALG00000009315	PAPLN	337.553	-1.29647	0.278303	1.74e-07	6.5e-07
ENSGALG00000032730	NOP56	12528.6	-1.29645	0.093206	3.38e-45	1.96e-43
ENSGALG00000046316	CFAP97D1	395.347	-1.29459	0.228876	8.76e-10	4.18e-09
ENSGALG00000002648		4386.06	-1.29407	0.131835	5.78e-24	9.17e-23
ENSGALG00000042056	gga-mir-1658	22.3399	-1.29384	0.426744	0.000118999	0.000316669
ENSGALG00000052632		4.80291	-1.29308	1.02366	0.00183472	0.00412019
ENSGALG00000041091	ATP6	485906	-1.29208	0.248367	1.11e-08	4.71e-08
ENSGALG00000014955		20.1746	-1.29046	0.625863	0.00146182	0.00333441
ENSGALG00000054167		86.2059	-1.28971	0.298869	8.73e-07	3.01e-06
ENSGALG00000037576	VSX1	9.76665	-1.28954	0.663738	0.00179408	0.00403567
ENSGALG00000047845		206.61	-1.28595	0.237541	3.55e-09	1.59e-08
ENSGALG00000049193	IQGAP3	7711.99	-1.28547	0.0917802	8.93e-46	5.4e-44
ENSGALG00000050503	TNFRSF4	151.592	-1.28515	0.194753	2.45e-12	1.49e-11
ENSGALG00000019794	MSTO1	2114.64	-1.284	0.155072	7.46e-18	7.23e-17
ENSGALG00000049524		2406.73	-1.28265	0.141226	6.52e-21	8.01e-20
ENSGALG00000017220		1813.16	-1.2801	0.159278	5.62e-17	5.05e-16
ENSGALG00000000585	MYL4	3.94303	-1.28004	1.17312	0.00108605	0.00253345
ENSGALG00000046823	SNX22	75.6078	-1.27953	0.37471	3.4e-05	9.7e-05
ENSGALG00000011524	PPEF2	37.8915	-1.27898	0.36032	2.08e-05	6.1e-05
ENSGALG00000040869		1158.15	-1.2766	0.126913	5.25e-25	9.06e-24
ENSGALG00000047532		562.241	-1.2764	0.15863	5.25e-17	4.73e-16
ENSGALG00000026836		17.3687	-1.276	0.570801	0.00108864	0.00253894
ENSGALG00000050728		29.4901	-1.27584	0.563348	0.00102162	0.00239338
ENSGALG00000037842	LRGUK	83.7182	-1.27368	0.396459	7e-05	0.000192242
ENSGALG00000036678	ETV4	1911.94	-1.27312	0.0881999	2.01e-48	1.41e-46
ENSGALG00000032856	GFRA2	37.0816	-1.27184	0.468347	0.00032997	0.000829409
ENSGALG00000043256		155.01	-1.27167	0.256551	4.22e-08	1.68e-07
ENSGALG00000037665	LMBR1L	239.11	-1.27096	0.241344	8.29e-09	3.57e-08
ENSGALG00000030470	SNORD30	53.7095	-1.26828	0.338812	1.02e-05	3.12e-05
ENSGALG00000004365		443.186	-1.26774	0.135636	5.74e-22	7.81e-21
ENSGALG00000052412		12.7635	-1.26757	0.74473	0.00262716	0.00575366
ENSGALG00000052368		7.21416	-1.26744	1.03782	0.00189668	0.00424924
ENSGALG00000030501		24.9161	-1.26645	0.627974	0.00173406	0.00390996
ENSGALG00000002108		45.5953	-1.26619	0.492277	0.000498226	0.00122106
ENSGALG00000037029		36.9224	-1.26557	0.367499	3.19e-05	9.13e-05
ENSGALG00000044362	PP2D1	25.9718	-1.26402	0.461715	0.000317794	0.000800803
ENSGALG00000030941	KIAA1324	388.926	-1.26393	0.185391	5.78e-13	3.71e-12
ENSGALG00000048002	CCS	5994.8	-1.26303	0.107534	4.84e-33	1.4e-31
ENSGALG00000052361		155.223	-1.26197	0.222909	9.23e-10	4.4e-09
ENSGALG00000047031		2666.29	-1.26183	0.0972203	1.05e-39	4.45e-38
ENSGALG00000027728		4.39816	-1.2607	0.726297	0.00262539	0.00575056
ENSGALG00000026056	SNORD39	42.7949	-1.25933	0.30336	1.95e-06	6.47e-06
ENSGALG00000046263		1469.68	-1.2588	0.123405	1.28e-25	2.32e-24
ENSGALG00000037228	OR8D4	29.6543	-1.25845	0.571555	0.00124521	0.00287908
ENSGALG00000017810		79.7559	-1.25843	0.27073	2.02e-07	7.51e-07
ENSGALG00000054926		19.5641	-1.25809	0.545611	0.000990841	0.00232569
ENSGALG00000051352		197.492	-1.25743	0.178382	1.15e-13	7.8e-13
ENSGALG00000012588	KIF27	112.194	-1.25658	0.277859	3.7e-07	1.33e-06
ENSGALG00000054322		934.946	-1.25488	0.21722	4.77e-10	2.33e-09
ENSGALG00000006562	MCF2	451.132	-1.2523	0.244344	1.85e-08	7.67e-08
ENSGALG00000054713		11800	-1.25133	0.120699	2.31e-26	4.39e-25
ENSGALG00000029675	MARCHF4	7.4915	-1.25081	0.882055	0.00292953	0.00635449
ENSGALG00000031648		824.961	-1.25055	0.169041	8.99e-15	6.76e-14
ENSGALG00000032161	SCUBE2	120.963	-1.24993	0.291331	1.09e-06	3.72e-06
ENSGALG00000053249		736.814	-1.24985	0.129358	2.9e-23	4.38e-22
ENSGALG00000038529	PLPPR3	598.443	-1.2488	0.204542	6.58e-11	3.5e-10
ENSGALG00000034688	TIMELESS	3892.45	-1.2484	0.0824598	6.01e-53	5.12e-51
ENSGALG00000005775		1330.47	-1.24817	0.172131	2.69e-14	1.94e-13
ENSGALG00000030955	gga-mir-3535	9.12356	-1.24688	0.588372	0.00153849	0.00349788
ENSGALG00000048409	TXNIP	28130.5	-1.24682	0.0709146	2.3e-70	3.95e-68
ENSGALG00000005889	CCDC18	1152.04	-1.24557	0.178599	2.01e-13	1.35e-12
ENSGALG00000017828		78.3819	-1.24306	0.230082	4.22e-09	1.87e-08
ENSGALG00000031824		1082.82	-1.24286	0.133257	7.33e-22	9.87e-21
ENSGALG00000045608		124.426	-1.24154	0.289912	1.15e-06	3.93e-06
ENSGALG00000012260	LCT	119.095	-1.24005	0.219879	1.11e-09	5.24e-09
ENSGALG00000029702		14773.2	-1.23973	0.146862	2.11e-18	2.14e-17
ENSGALG00000004515		2703.62	-1.23817	0.146527	1.97e-18	2e-17
ENSGALG00000006040	UCKL1	3586.49	-1.23645	0.128395	4.08e-23	6.08e-22
ENSGALG00000045529	RAB15	2040.25	-1.23638	0.10445	1.73e-33	5.25e-32
ENSGALG00000052426		90.756	-1.23632	0.339968	1.7e-05	5.03e-05
ENSGALG00000053439		47.0533	-1.23566	0.342725	1.92e-05	5.64e-05
ENSGALG00000040316	GPC1	37.6401	-1.2354	0.574243	0.00150287	0.0034198
ENSGALG00000031859	NKX3-2	659.883	-1.23506	0.151422	2.34e-17	2.18e-16
ENSGALG00000047821		40.0206	-1.23494	0.430799	0.000238656	0.00061056
ENSGALG00000047622		1217.91	-1.23361	0.203192	8.46e-11	4.44e-10
ENSGALG00000005655		139.619	-1.23276	0.247889	4.31e-08	1.72e-07
ENSGALG00000036831		27.361	-1.2327	0.463515	0.00043845	0.00108397
ENSGALG00000011816	ENGASE	825.05	-1.23208	0.151153	2.47e-17	2.28e-16
ENSGALG00000039864		1590.22	-1.23206	0.161757	1.77e-15	1.4e-14
ENSGALG00000005695	CHEK2	1869.92	-1.23156	0.10172	6.74e-35	2.23e-33
ENSGALG00000001845	PHTF1	2477.33	-1.23108	0.127816	4.07e-23	6.07e-22
ENSGALG00000033792		8915.24	-1.22955	0.10666	6.69e-32	1.83e-30
ENSGALG00000011104	GCG	902.731	-1.22861	0.232852	8.77e-09	3.76e-08
ENSGALG00000053238		21.6245	-1.2286	0.580626	0.00165503	0.00374275
ENSGALG00000033570		9682.56	-1.22857	0.090247	2.35e-43	1.23e-41
ENSGALG00000035814		2645.19	-1.22741	0.0907899	8.51e-43	4.24e-41
ENSGALG00000006919	POF1B	307.531	-1.22498	0.237443	1.66e-08	6.93e-08
ENSGALG00000050568		54.6161	-1.22493	0.469804	0.000519111	0.00126858
ENSGALG00000052770		1941.28	-1.2244	0.149302	1.66e-17	1.56e-16
ENSGALG00000016902	GPC5	67.6529	-1.22325	0.382036	8.46e-05	0.000229661
ENSGALG00000048996		451.996	-1.22315	0.244354	3.74e-08	1.5e-07
ENSGALG00000030510		63.7295	-1.22245	0.327334	1.21e-05	3.66e-05
ENSGALG00000003203		35.2775	-1.22172	0.349973	3.06e-05	8.78e-05
ENSGALG00000050086	RNF207	2359.58	-1.22156	0.111695	5.48e-29	1.25e-27
ENSGALG00000032428		400.299	-1.22041	0.192509	1.59e-11	9.03e-11
ENSGALG00000027418		2170.44	-1.22038	0.128833	1.94e-22	2.75e-21
ENSGALG00000049992		79.0121	-1.21999	0.378992	8.06e-05	0.000219322
ENSGALG00000008417	CFAP58	25.3287	-1.21984	0.642011	0.00251507	0.00552472
ENSGALG00000047157		44.13	-1.2186	0.378024	7.97e-05	0.000216952
ENSGALG00000050350	HIST1H2B7	470.036	-1.21827	0.155452	3.26e-16	2.75e-15
ENSGALG00000033567		845.421	-1.2181	0.144766	2.8e-18	2.82e-17
ENSGALG00000025674	SNORD127	179.3	-1.21796	0.223096	3.28e-09	1.47e-08
ENSGALG00000053260		18.6377	-1.21706	0.71746	0.00328189	0.00706171
ENSGALG00000025587		29.0731	-1.21688	0.420355	0.000231899	0.000594028
ENSGALG00000004691	NLE1	2578.02	-1.21631	0.121744	1.2e-24	2e-23
ENSGALG00000030890	RRS1	7171.72	-1.21602	0.154378	2.38e-16	2.03e-15
ENSGALG00000037791	FRMD4B	435.848	-1.21542	0.236521	1.9e-08	7.86e-08
ENSGALG00000001701		1417.75	-1.21519	0.202509	1.37e-10	7.04e-10
ENSGALG00000020322		4470.19	-1.21349	0.118895	1.34e-25	2.42e-24
ENSGALG00000050390	CYB561D2	3540.64	-1.21325	0.100372	8.95e-35	2.93e-33
ENSGALG00000046734		385.804	-1.21308	0.250672	8.96e-08	3.47e-07
ENSGALG00000006273	MYLK2	30.2108	-1.21219	0.632324	0.00252285	0.00553878
ENSGALG00000015172		6.29532	-1.2116	0.920395	0.00320489	0.00690803
ENSGALG00000005862	SBSPONL	26.6338	-1.21131	0.554542	0.00152896	0.00347671
ENSGALG00000039499	LRRCC1	2451.75	-1.21011	0.1296	7.18e-22	9.68e-21
ENSGALG00000046955		191.847	-1.20966	0.248922	8.17e-08	3.18e-07
ENSGALG00000034512		1208.51	-1.20939	0.168896	5.77e-14	4.03e-13
ENSGALG00000010226		1248.45	-1.20936	0.0776623	8.33e-56	8.49e-54
ENSGALG00000044814	CCDC14	1405.82	-1.20833	0.146262	1.04e-17	9.97e-17
ENSGALG00000035685		1193.22	-1.20826	0.207008	3.78e-10	1.87e-09
ENSGALG00000049166		20.1973	-1.2071	0.550418	0.00152334	0.00346513
ENSGALG00000012712	RBM24	49.6651	-1.20662	0.371416	7.59e-05	0.000207273
ENSGALG00000000102	UBE2T	2256.04	-1.20624	0.0920593	2.35e-40	1.04e-38
ENSGALG00000017870	SNORD24	39.0088	-1.20609	0.291143	2.36e-06	7.72e-06
ENSGALG00000002048	GPRIN2	37.2925	-1.20576	0.413185	0.000223615	0.000573997
ENSGALG00000037747		643.46	-1.20456	0.126742	1.49e-22	2.13e-21
ENSGALG00000001824		271.963	-1.20402	0.164121	1.6e-14	1.17e-13
ENSGALG00000032816		44.3872	-1.20372	0.508762	0.00103726	0.00242792
ENSGALG00000039903	VSIG10	1210.84	-1.20361	0.145415	9.27e-18	8.91e-17
ENSGALG00000008155	KCTD18	18.6718	-1.20332	0.819739	0.00381995	0.00810394
ENSGALG00000036958		75.847	-1.20308	0.332811	2.04e-05	5.97e-05
ENSGALG00000003549	MTG1	2194.6	-1.20217	0.101896	2.98e-33	8.92e-32
ENSGALG00000007917	LAMB4	6.98481	-1.20176	0.888289	0.00355663	0.00760003
ENSGALG00000029819	SCG2	14858.5	-1.20065	0.201315	1.78e-10	9.07e-10
ENSGALG00000048315		1309.86	-1.20026	0.154363	5.54e-16	4.57e-15
ENSGALG00000050047		1560.15	-1.20025	0.123797	2.35e-23	3.58e-22
ENSGALG00000023439		22.3847	-1.19988	0.571672	0.00190147	0.0042594
ENSGALG00000048771		18311.2	-1.19965	0.0580063	3.86e-96	1.48e-93
ENSGALG00000032770	VRK2	3739.37	-1.1992	0.139898	7.56e-19	7.97e-18
ENSGALG00000012429	BMP4	118.574	-1.19892	0.299648	4.4e-06	1.4e-05
ENSGALG00000019741	PSMC3IP	1897.56	-1.19882	0.0853441	6.09e-46	3.74e-44
ENSGALG00000027053	AKAIN1	12.9745	-1.19659	0.637852	0.00285884	0.00621454
ENSGALG00000015485	ACP6	924.235	-1.1961	0.150651	1.52e-16	1.31e-15
ENSGALG00000014988	POPDC2	28.2404	-1.196	0.504593	0.00105417	0.00246396
ENSGALG00000045185		3851.95	-1.19534	0.0822316	5.44e-49	3.97e-47
ENSGALG00000054766	ITGA2B	149.557	-1.19433	0.265738	5.01e-07	1.77e-06
ENSGALG00000030512		189.106	-1.1942	0.231749	1.87e-08	7.74e-08
ENSGALG00000046750	SNORD58	4.2296	-1.19409	0.781658	0.0040034	0.00846372
ENSGALG00000033303		430.853	-1.19367	0.213878	1.76e-09	8.13e-09
ENSGALG00000051951		57.466	-1.19344	0.340958	3.22e-05	9.21e-05
ENSGALG00000031262		65.8636	-1.19221	0.339339	3.08e-05	8.83e-05
ENSGALG00000049195		754.485	-1.19194	0.199329	1.66e-10	8.47e-10
ENSGALG00000033061	CAMK2B	6529.38	-1.19168	0.154547	9.43e-16	7.61e-15
ENSGALG00000010228	TOE1	1468.24	-1.19145	0.0852814	1.81e-45	1.08e-43
ENSGALG00000047094		55.6778	-1.19065	0.314855	1.1e-05	3.35e-05
ENSGALG00000042986	RNASEL	1003.14	-1.18913	0.173065	4.81e-13	3.11e-12
ENSGALG00000027630	NPR2	497.164	-1.18837	0.140524	2.1e-18	2.14e-17
ENSGALG00000029980	QARS	7504.06	-1.18792	0.0838834	1.23e-46	7.73e-45
ENSGALG00000033039	ENG	192.02	-1.18731	0.218657	4.21e-09	1.87e-08
ENSGALG00000048204		10.0983	-1.18627	0.855279	0.0039961	0.00845162
ENSGALG00000048316		20.4328	-1.18517	0.641227	0.0031171	0.00672509
ENSGALG00000006443	MADPRT1	107.267	-1.18484	0.241106	6.64e-08	2.6e-07
ENSGALG00000037390	GPR83L	8.84761	-1.18442	0.991636	0.00285471	0.00620808
ENSGALG00000039839	HEXD	1367.41	-1.18439	0.143072	9.63e-18	9.24e-17
ENSGALG00000011414	AMDHD1	23.1606	-1.18389	0.500006	0.00110546	0.00257518
ENSGALG00000019976		1542.12	-1.18381	0.104451	6.98e-31	1.81e-29
ENSGALG00000015343	RTN4IP1	828.993	-1.18351	0.142563	7.93e-18	7.67e-17
ENSGALG00000026380	UBE2C	17987.7	-1.18118	0.0597457	4.26e-88	1.27e-85
ENSGALG00000006054	CALCA	131.662	-1.18047	0.286631	2.82e-06	9.14e-06
ENSGALG00000053091		57.7373	-1.18029	0.384093	0.000148277	0.000389812
ENSGALG00000027287	HK3	2403.83	-1.18016	0.1834	9.51e-12	5.49e-11
ENSGALG00000017836		34.7163	-1.1794	0.372262	0.000108492	0.000290534
ENSGALG00000048226		138.923	-1.17897	0.27744	1.6e-06	5.35e-06
ENSGALG00000009945	CPM	29.7944	-1.17847	0.473803	0.000833474	0.00197882
ENSGALG00000041407		81.5145	-1.17683	0.310049	1.09e-05	3.3e-05
ENSGALG00000043605	BEST4	42.8336	-1.17662	0.311324	1.16e-05	3.52e-05
ENSGALG00000049164		998.833	-1.17554	0.188626	3.58e-11	1.97e-10
ENSGALG00000000994		20.3427	-1.17463	0.748083	0.00432589	0.00910604
ENSGALG00000010122	SH2D4A	112.332	-1.17293	0.204866	8.05e-10	3.86e-09
ENSGALG00000025255	gga-mir-1562	7.16112	-1.1729	0.690993	0.00396042	0.00838166
ENSGALG00000010997	DFNA5	7.03192	-1.17211	1.02898	0.0025586	0.0056119
ENSGALG00000047905		39.699	-1.17159	0.488605	0.00107062	0.00249945
ENSGALG00000032079	CYTB	298457	-1.17033	0.277355	1.87e-06	6.2e-06
ENSGALG00000053625	STAC3	61.2149	-1.17011	0.2939	5.21e-06	1.64e-05
ENSGALG00000008508	PYGB	54.327	-1.1699	0.351248	6.38e-05	0.000176262
ENSGALG00000039917	EXOSC1	1944.26	-1.16951	0.0947568	4.35e-36	1.55e-34
ENSGALG00000026161		150.833	-1.16937	0.219602	7.91e-09	3.41e-08
ENSGALG00000001616	CDC45	7038.07	-1.16865	0.109693	1.35e-27	2.74e-26
ENSGALG00000010195		4313.82	-1.16805	0.114139	1.14e-25	2.06e-24
ENSGALG00000049692		19.6316	-1.16752	0.559366	0.00219031	0.00485331
ENSGALG00000007305	NME1	99.1588	-1.16723	0.325149	2.49e-05	7.23e-05
ENSGALG00000046749		125.114	-1.16707	0.328285	2.85e-05	8.19e-05
ENSGALG00000001117	PFKFB2	737.145	-1.16678	0.170897	6.92e-13	4.41e-12
ENSGALG00000017128	SKA3	2585.3	-1.16665	0.0845358	2.06e-44	1.15e-42
ENSGALG00000030436	ND3	63903.5	-1.16633	0.242702	1.21e-07	4.61e-07
ENSGALG00000021738		8.66296	-1.16579	0.601211	0.00290784	0.00631339
ENSGALG00000004670	ATRIP	4350.66	-1.16518	0.134337	3.4e-19	3.69e-18
ENSGALG00000004801	PHKA1	7025.95	-1.16426	0.144861	7.46e-17	6.63e-16
ENSGALG00000029444	CLK2	4144.26	-1.16346	0.113344	8.31e-26	1.52e-24
ENSGALG00000043368		3.60497	-1.1633	1.01367	0.00279031	0.00607788
ENSGALG00000002370	SH2D4B	17.9279	-1.16322	0.55607	0.00220412	0.00488163
ENSGALG00000054726		122.146	-1.16278	0.299025	7.8e-06	2.4e-05
ENSGALG00000029203	TNNT1	61.2243	-1.16275	0.264104	8.4e-07	2.9e-06
ENSGALG00000048740		14.4269	-1.16229	0.669004	0.00396335	0.00838564
ENSGALG00000026105		5.93468	-1.16151	0.750178	0.00463965	0.00970557
ENSGALG00000037408	ADMP	135.338	-1.16127	0.302817	9.74e-06	2.97e-05
ENSGALG00000035761		55.4024	-1.16057	0.446801	0.000659179	0.00158916
ENSGALG00000017902	U2	4.75374	-1.16039	1.02133	0.00272481	0.0059489
ENSGALG00000026189		889.182	-1.16028	0.166287	2.45e-13	1.63e-12
ENSGALG00000025225	gga-mir-1583	8.04419	-1.15998	0.70763	0.00441836	0.00928854
ENSGALG00000046764		54.2449	-1.15897	0.420294	0.000421114	0.00104496
ENSGALG00000018241	gga-let-7b	6.54978	-1.15872	0.713399	0.0044961	0.00943227
ENSGALG00000006651	OGG1	715.282	-1.15855	0.128812	1.97e-20	2.32e-19
ENSGALG00000027240	TSPAN13	24.0735	-1.158	0.586407	0.00281278	0.00612104
ENSGALG00000034533		95.9008	-1.15746	0.19178	1.29e-10	6.66e-10
ENSGALG00000051012	USP21	565.741	-1.1574	0.150535	1.23e-15	9.8e-15
ENSGALG00000004505	CCDC137	2378.28	-1.15712	0.0982951	4.55e-33	1.32e-31
ENSGALG00000053759		41.7079	-1.15555	0.483072	0.00114706	0.00266671
ENSGALG00000052894		411.697	-1.15501	0.180099	1.17e-11	6.73e-11
ENSGALG00000003443	LRRC52	426.945	-1.15416	0.128111	1.74e-20	2.06e-19
ENSGALG00000030331	SNORD51	5.87303	-1.15379	0.736012	0.00476637	0.00995126
ENSGALG00000053386		9.19935	-1.15311	0.894882	0.00425597	0.00896354
ENSGALG00000053778		56.0745	-1.15276	0.509485	0.00157966	0.0035829
ENSGALG00000000516	FANCA	2252.14	-1.15205	0.111537	4.4e-26	8.13e-25
ENSGALG00000032385	PFKFB4	228.314	-1.15181	0.2204	1.42e-08	5.97e-08
ENSGALG00000045898		38.9537	-1.15135	0.514724	0.00168392	0.00380489
ENSGALG00000012466	FKBP3	19014	-1.15052	0.0893771	5.45e-39	2.22e-37
ENSGALG00000023506		3083.36	-1.14963	0.139774	1.65e-17	1.55e-16
ENSGALG00000047211	FCER1G	31.612	-1.1494	0.459849	0.000889882	0.00210252
ENSGALG00000012541	MB	55.2528	-1.14879	0.46487	0.000960094	0.00225615
ENSGALG00000049128		68.8484	-1.14733	0.396208	0.000288652	0.00073034
ENSGALG00000041161	NT5DC4	183.847	-1.14732	0.223404	2.34e-08	9.59e-08
ENSGALG00000003034	SS2	31.4006	-1.14651	0.475061	0.00112149	0.00261027
ENSGALG00000034631		97.0039	-1.14624	0.27445	2.43e-06	7.92e-06
ENSGALG00000049187		13.7578	-1.14588	0.496551	0.00145586	0.00332271
ENSGALG00000051597		2550.19	-1.14576	0.114823	1.62e-24	2.67e-23
ENSGALG00000032955	TUFT1	5673.6	-1.14418	0.0884584	2.48e-39	1.03e-37
ENSGALG00000051835		19.4884	-1.14351	0.420982	0.000499156	0.00122297
ENSGALG00000053035		310.493	-1.14257	0.172641	3.11e-12	1.88e-11
ENSGALG00000041926	HEXIM1	6976.63	-1.14245	0.106238	4.93e-28	1.04e-26
ENSGALG00000011013	PCNX2	12.3112	-1.14233	0.571079	0.00284587	0.00618971
ENSGALG00000018534		3.59477	-1.14144	1.0012	0.0031199	0.00673023
ENSGALG00000006714	CCDC61	2873.01	-1.141	0.090196	9.72e-38	3.72e-36
ENSGALG00000045063	LRP2BP	108.939	-1.14064	0.323978	3.51e-05	9.97e-05
ENSGALG00000008447	SH2D1A	9.90873	-1.1401	0.852157	0.00489047	0.0101868
ENSGALG00000046486		69.5139	-1.14007	0.461317	0.000988358	0.00232088
ENSGALG00000028316		4.52855	-1.13806	0.918528	0.00423033	0.00891305
ENSGALG00000046857		799.456	-1.13769	0.143805	2.22e-16	1.9e-15
ENSGALG00000029862		251.271	-1.13627	0.262858	1.31e-06	4.42e-06
ENSGALG00000030684		15.8023	-1.13617	0.438442	0.000726771	0.00174116
ENSGALG00000029193		1305.77	-1.13585	0.288125	6.78e-06	2.11e-05
ENSGALG00000047566		9344.58	-1.13577	0.0722387	9.4e-57	1.04e-54
ENSGALG00000040480	NSMCE3	6473.73	-1.1343	0.072898	1.21e-55	1.22e-53
ENSGALG00000001376	ARID3B	914.241	-1.13405	0.189546	1.91e-10	9.67e-10
ENSGALG00000052769		1300.5	-1.13395	0.12013	3.31e-22	4.6e-21
ENSGALG00000053332		1668.77	-1.13345	0.128867	1.26e-19	1.42e-18
ENSGALG00000035406	DSN1	3657.76	-1.13201	0.0559929	6.21e-92	2.13e-89
ENSGALG00000028347	SDCBP2	40.5267	-1.13171	0.474118	0.00126018	0.00291076
ENSGALG00000035334	COX3	437907	-1.13152	0.240561	2.21e-07	8.17e-07
ENSGALG00000029610	RGS9	2252.43	-1.131	0.193961	4.83e-10	2.36e-09
ENSGALG00000003553	ABCA12	43.1481	-1.1307	0.497327	0.00166324	0.00376079
ENSGALG00000051993		562.229	-1.13067	0.180484	3.29e-11	1.82e-10
ENSGALG00000006719	GNAZ	14.0388	-1.13059	0.690491	0.00503262	0.0104597
ENSGALG00000009854	NEK2	5262.87	-1.13033	0.0833113	5.6e-43	2.83e-41
ENSGALG00000047587		8.70004	-1.13032	0.888733	0.00471808	0.00986068
ENSGALG00000035499	SKIV2L	3796.23	-1.12983	0.0963418	8.28e-33	2.38e-31
ENSGALG00000037519	C1orf35	3728.22	-1.12894	0.0612424	6.34e-77	1.38e-74
ENSGALG00000007579	APBB1IP	212.125	-1.12864	0.190593	2.82e-10	1.41e-09
ENSGALG00000036049	LETM2	4271.32	-1.12864	0.128717	1.62e-19	1.8e-18
ENSGALG00000040784	RAB39B	3188.49	-1.12828	0.120296	5.97e-22	8.1e-21
ENSGALG00000012197	ACMSD	8.0422	-1.12705	0.798726	0.00551575	0.0113815
ENSGALG00000028041		227.241	-1.12703	0.256337	9.59e-07	3.29e-06
ENSGALG00000052976		2448.7	-1.12695	0.14888	3.36e-15	2.6e-14
ENSGALG00000046877		61.8468	-1.12683	0.260216	1.3e-06	4.39e-06
ENSGALG00000006221	KIF1A	6.02298	-1.12584	1.0692	0.00236466	0.00521016
ENSGALG00000036796	HYLS1	5102.36	-1.12553	0.0883694	3.36e-38	1.32e-36
ENSGALG00000005156		403.879	-1.12407	0.172804	6.99e-12	4.08e-11
ENSGALG00000048543	RPP14	9.10403	-1.12362	0.70524	0.00537843	0.0111128
ENSGALG00000052912		33.527	-1.12255	0.353913	0.000128067	0.000339675
ENSGALG00000054779	FAM206A	772.506	-1.12058	0.102529	7.66e-29	1.71e-27
ENSGALG00000028172	WDR90	6056.6	-1.12013	0.120913	1.81e-21	2.35e-20
ENSGALG00000054637		1170.22	-1.11941	0.162426	5.03e-13	3.25e-12
ENSGALG00000033877	KANSL2	1713.44	-1.11879	0.0886446	1.49e-37	5.63e-36
ENSGALG00000032585		12.2579	-1.11643	0.509606	0.00211229	0.00469332
ENSGALG00000054302		152.162	-1.1164	0.318362	3.98e-05	0.000112227
ENSGALG00000009173	GFRA1	8.67645	-1.11627	0.807644	0.00575687	0.0118411
ENSGALG00000037838	ND6	14976.7	-1.11618	0.261555	1.78e-06	5.91e-06
ENSGALG00000030546	CLEC19A	29.9186	-1.116	0.410298	0.000540353	0.00131649
ENSGALG00000054023		1056.79	-1.11452	0.110649	6.81e-25	1.16e-23
ENSGALG00000039572	PADI1	95.5548	-1.11438	0.309169	2.77e-05	7.99e-05
ENSGALG00000034294	ATP6V0D2	8.12934	-1.11416	0.985737	0.00359254	0.00766965
ENSGALG00000053187		1172.9	-1.11408	0.180432	6.13e-11	3.27e-10
ENSGALG00000041074		2.61697	-1.11353	0.981843	0.00365821	0.00779433
ENSGALG00000051460		25.6819	-1.11253	0.409657	0.000553292	0.00134557
ENSGALG00000000277	GnRH-I	151.653	-1.11141	0.235512	2.18e-07	8.05e-07
ENSGALG00000008313	NAPB	808.148	-1.11133	0.182738	1.11e-10	5.76e-10
ENSGALG00000011222	IL12RB2	34.6843	-1.11102	0.434331	0.000865471	0.00204845
ENSGALG00000047276		566.009	-1.11099	0.178788	4.81e-11	2.61e-10
ENSGALG00000054262	ITPRID1	7.14814	-1.1108	0.815213	0.00585493	0.0120274
ENSGALG00000041323		941.425	-1.11028	0.115812	8.56e-23	1.25e-21
ENSGALG00000046347	FOXRED1	2304.92	-1.11023	0.108839	1.86e-25	3.31e-24
ENSGALG00000050283		672.448	-1.10842	0.313991	3.74e-05	0.000105888
ENSGALG00000004604		2173.1	-1.10823	0.143796	1.22e-15	9.73e-15
ENSGALG00000026431	SEZ6	7.71871	-1.1082	0.913004	0.00478749	0.00998889
ENSGALG00000031069		2235.78	-1.10798	0.136144	3.8e-17	3.45e-16
ENSGALG00000046125	PECAM1	720.33	-1.10709	0.240491	3.86e-07	1.39e-06
ENSGALG00000055092		517.246	-1.1061	0.162946	1.08e-12	6.76e-12
ENSGALG00000032456	COII	434123	-1.10463	0.240446	4.07e-07	1.46e-06
ENSGALG00000010440	MKNK1	120.76	-1.10419	0.206831	8.85e-09	3.8e-08
ENSGALG00000052600		19.15	-1.10415	0.428455	0.000840751	0.00199404
ENSGALG00000003842	GHRH	8.60631	-1.10369	0.723734	0.00613382	0.0125571
ENSGALG00000047788		11.8808	-1.1032	0.507688	0.00230283	0.00508417
ENSGALG00000002692		30.5234	-1.10274	0.524654	0.00268843	0.00587507
ENSGALG00000024049	RAB33A	153.257	-1.10219	0.291179	1.42e-05	4.26e-05
ENSGALG00000031590	B3GAT2	21.6131	-1.1003	0.479266	0.00175384	0.00395014
ENSGALG00000005284	LRRC39	8.22638	-1.09995	0.736356	0.00631654	0.0129048
ENSGALG00000047639		3581.33	-1.09919	0.165508	3e-12	1.82e-11
ENSGALG00000035975		2831.42	-1.09919	0.284124	1.03e-05	3.12e-05
ENSGALG00000001942	SPDL1	5264.75	-1.09894	0.13053	3.69e-18	3.67e-17
ENSGALG00000010459	VIPAS39	4162.95	-1.09893	0.132732	1.2e-17	1.14e-16
ENSGALG00000049199		12.5094	-1.09848	0.822325	0.00612839	0.0125475
ENSGALG00000012424	GTDC1	793.897	-1.09806	0.151741	4.48e-14	3.16e-13
ENSGALG00000052611		446.741	-1.09795	0.165075	2.82e-12	1.71e-11
ENSGALG00000054342		28.2482	-1.09789	0.537684	0.00309409	0.00668082
ENSGALG00000049457		8.41739	-1.09746	1.19043	0.00125527	0.00289985
ENSGALG00000004366	BAP1	11750.6	-1.09746	0.115111	1.48e-22	2.12e-21
ENSGALG00000003016	MASP2	14.1614	-1.09677	0.710322	0.00627121	0.012822
ENSGALG00000011328	GLB1L	1753.08	-1.09651	0.1387	2.61e-16	2.21e-15
ENSGALG00000047352		4035.14	-1.0961	0.161907	1.26e-12	7.86e-12
ENSGALG00000052799		308.119	-1.09527	0.196836	2.56e-09	1.16e-08
ENSGALG00000040478	CAPN5	93.105	-1.09502	0.33692	0.000106923	0.000286569
ENSGALG00000042871	SLIT1	150.467	-1.09476	0.289537	1.48e-05	4.42e-05
ENSGALG00000042936	SYCE3	50.6875	-1.09459	0.49821	0.00224995	0.00497698
ENSGALG00000048950		80.5386	-1.09383	0.408907	0.000661501	0.00159428
ENSGALG00000042452	DPP4	107.846	-1.09328	0.34957	0.000163054	0.00042664
ENSGALG00000025678		30.781	-1.09311	0.457173	0.00142322	0.003255
ENSGALG00000003614	AZIN2	2010.64	-1.09278	0.140932	8.8e-16	7.13e-15
ENSGALG00000046384		78.0224	-1.09224	0.296279	2.17e-05	6.33e-05
ENSGALG00000010167	PNN	12973.9	-1.09203	0.137585	2.05e-16	1.76e-15
ENSGALG00000025677	SCARNA8	19.3285	-1.09194	0.48592	0.00202485	0.0045144
ENSGALG00000013607	FBXO5	4265.12	-1.09146	0.0623295	1.18e-69	1.99e-67
ENSGALG00000049448		396.998	-1.09041	0.251471	1.41e-06	4.76e-06
ENSGALG00000003155	SRR	607.937	-1.09037	0.11739	1.56e-21	2.04e-20
ENSGALG00000006034	PITPNM3	58.7743	-1.09018	0.465965	0.00163339	0.00369591
ENSGALG00000041347	PROM2	18.2655	-1.08883	0.558493	0.00382013	0.00810394
ENSGALG00000031243	ABCB8	2666.21	-1.08881	0.113806	1.1e-22	1.6e-21
ENSGALG00000034198	MCM10	2372.61	-1.08774	0.106289	1.41e-25	2.53e-24
ENSGALG00000047713	QPRT	782.319	-1.08743	0.118309	3.9e-21	4.91e-20
ENSGALG00000042868		48.5651	-1.08711	0.376696	0.000361338	0.000903176
ENSGALG00000051907		16.7357	-1.0864	0.522035	0.00297832	0.0064525
ENSGALG00000034399		8206.12	-1.08609	0.185523	4.8e-10	2.34e-09
ENSGALG00000050394		143.169	-1.08493	0.265818	4.41e-06	1.4e-05
ENSGALG00000030979	MKS1	1653.39	-1.08453	0.129894	6.95e-18	6.76e-17
ENSGALG00000053585		198.936	-1.08432	0.197419	3.98e-09	1.77e-08
ENSGALG00000001058	ARHGEF16	340.47	-1.08427	0.161372	1.85e-12	1.14e-11
ENSGALG00000004878		394.693	-1.08327	0.183787	3.8e-10	1.88e-09
ENSGALG00000014924	POLQ	728.707	-1.0828	0.157478	6.25e-13	3.99e-12
ENSGALG00000006051	CDC7	1404.63	-1.08192	0.0811514	1.54e-41	7.13e-40
ENSGALG00000053608		793.172	-1.0812	0.184966	5.13e-10	2.5e-09
ENSGALG00000047242	MAST1	285.936	-1.08062	0.232436	3.36e-07	1.21e-06
ENSGALG00000003987	TRAF4	427.665	-1.08051	0.192865	2.15e-09	9.85e-09
ENSGALG00000004199	TMEM184A	260.337	-1.0804	0.227668	2.1e-07	7.77e-07
ENSGALG00000006057	CLK4	3072.36	-1.08035	0.106499	3.61e-25	6.31e-24
ENSGALG00000049464		20.1337	-1.08027	0.539574	0.00357073	0.00762613
ENSGALG00000002892		43.2684	-1.07983	0.426713	0.00103465	0.00242236
ENSGALG00000014513	CDCA3	7871.79	-1.07792	0.0666631	8.57e-60	1.07e-57
ENSGALG00000031056	NEMP1	2877.89	-1.0774	0.113279	1.96e-22	2.77e-21
ENSGALG00000006064	TEKT1	121.445	-1.07665	0.214625	5.39e-08	2.13e-07
ENSGALG00000020479	SLC43A3	2819.6	-1.07625	0.0850673	1.14e-37	4.32e-36
ENSGALG00000000657	TERF2	4775.44	-1.07622	0.0948254	7.76e-31	2.01e-29
ENSGALG00000004339		18.4414	-1.07613	0.464275	0.00180786	0.00406497
ENSGALG00000049528		129.583	-1.07601	0.1819	3.42e-10	1.7e-09
ENSGALG00000033769		224.004	-1.07572	0.194309	3.19e-09	1.43e-08
ENSGALG00000005537	ASB14	198.03	-1.07489	0.300664	3.51e-05	9.97e-05
ENSGALG00000051219		10.6203	-1.07356	0.603958	0.00539413	0.0111434
ENSGALG00000050456		22.431	-1.07352	0.565434	0.00443606	0.00931966
ENSGALG00000053345		37.9001	-1.07311	0.576602	0.00473788	0.00989821
ENSGALG00000016815		31.4405	-1.07201	0.442081	0.00140286	0.00321313
ENSGALG00000003333	GHDC	3747.96	-1.07161	0.116292	3.28e-21	4.16e-20
ENSGALG00000049131		67.7794	-1.07137	0.317214	7.36e-05	0.000201483
ENSGALG00000051290		112.178	-1.07036	0.326694	0.000105556	0.00028327
ENSGALG00000053991		6769.55	-1.07008	0.148353	5.77e-14	4.03e-13
ENSGALG00000042741	GRK2	4247.8	-1.06964	0.11876	2.25e-20	2.64e-19
ENSGALG00000052251		745.128	-1.06939	0.148572	6.47e-14	4.51e-13
ENSGALG00000010900	SPC25	5368.51	-1.06757	0.0779301	1.1e-43	5.84e-42
ENSGALG00000012452	MIS18BP1	8594.79	-1.06738	0.108023	5.37e-24	8.55e-23
ENSGALG00000011322	NEK10	37.9591	-1.06684	0.442722	0.00148447	0.0033808
ENSGALG00000011856	FMC1	2214.34	-1.06662	0.0997962	1.24e-27	2.52e-26
ENSGALG00000044688		5.42814	-1.06653	0.918352	0.00543227	0.0112193
ENSGALG00000010977	FAM221A	114.672	-1.06649	0.234661	5.78e-07	2.03e-06
ENSGALG00000043823	ECSIT	2601.7	-1.06628	0.0762143	1.91e-45	1.14e-43
ENSGALG00000043285	CNTD1	791.609	-1.06585	0.134329	2.26e-16	1.93e-15
ENSGALG00000051072		70.4643	-1.06566	0.286269	2.04e-05	5.99e-05
ENSGALG00000008386	KIZ	933.419	-1.06563	0.134702	2.73e-16	2.32e-15
ENSGALG00000015322	IMPG2	114.738	-1.06488	0.219467	1.29e-07	4.92e-07
ENSGALG00000017098	GTF3A	2321.87	-1.06452	0.0692142	2.4e-54	2.24e-52
ENSGALG00000032298		26.4225	-1.06389	0.483269	0.00248226	0.00545784
ENSGALG00000049256		23.949	-1.063	0.522782	0.00357584	0.00763601
ENSGALG00000054529		5.88741	-1.06224	0.749562	0.00767462	0.0154288
ENSGALG00000023780	TREM-B2	7.36496	-1.06203	1.04287	0.00307467	0.00664425
ENSGALG00000020342		4037.98	-1.06174	0.0782361	6.47e-43	3.25e-41
ENSGALG00000052525		1303.22	-1.06121	0.158184	2.12e-12	1.3e-11
ENSGALG00000047771	PGF	418.565	-1.06003	0.167093	2.43e-11	1.36e-10
ENSGALG00000022622	HOXA4	630.784	-1.05992	0.158101	2.2e-12	1.34e-11
ENSGALG00000042197	WDR75	4872.02	-1.05956	0.115068	3.62e-21	4.57e-20
ENSGALG00000002426	EXOSC3	891.471	-1.05949	0.110899	1.37e-22	1.96e-21
ENSGALG00000044851		161.609	-1.05944	0.19634	7.37e-09	3.19e-08
ENSGALG00000049007		174.175	-1.05926	0.239217	1.02e-06	3.5e-06
ENSGALG00000040424	SCNN1A	36.8766	-1.05894	0.37271	0.000454271	0.0011205
ENSGALG00000007841		83.3485	-1.05841	0.370044	0.00042935	0.00106294
ENSGALG00000016467	SMC6	3605.32	-1.05785	0.155447	1.1e-12	6.92e-12
ENSGALG00000002198	FHOD1	17056.2	-1.05771	0.0999483	3.95e-27	7.82e-26
ENSGALG00000015026		59.9461	-1.05741	0.346449	0.000234646	0.000600684
ENSGALG00000011202	COLQ	111.132	-1.05726	0.347521	0.000242401	0.000619648
ENSGALG00000002630	ZNF76	1816.5	-1.05716	0.136659	1.13e-15	9.03e-15
ENSGALG00000007689	CCDC84	688.592	-1.05636	0.121013	2.82e-19	3.08e-18
ENSGALG00000018265	gga-let-7f	5.67604	-1.05497	0.684248	0.00759859	0.0152934
ENSGALG00000046920		23.0585	-1.05483	0.394965	0.000761905	0.00182099
ENSGALG00000052495		38.252	-1.05482	0.441396	0.00162716	0.0036844
ENSGALG00000030683	SNORD22	28.5939	-1.05467	0.427087	0.00132508	0.00304755
ENSGALG00000051336	ANKLE1	3425.62	-1.05391	0.0886187	1.44e-33	4.38e-32
ENSGALG00000049264		126.245	-1.05385	0.195518	7.75e-09	3.35e-08
ENSGALG00000048001		1517.44	-1.05372	0.138849	3.57e-15	2.77e-14
ENSGALG00000002318	LVRN	10.7619	-1.05359	0.679552	0.00759873	0.0152934
ENSGALG00000018815	PCGF2	3155.04	-1.05331	0.105709	2.43e-24	3.96e-23
ENSGALG00000010294	RPS6KL1	106.33	-1.05253	0.460334	0.00211651	0.00470119
ENSGALG00000025692		187.026	-1.05219	0.225672	3.44e-07	1.24e-06
ENSGALG00000049390		519.808	-1.0521	0.154321	1.03e-12	6.48e-12
ENSGALG00000003172	SLC16A9	35.9463	-1.05063	0.503746	0.00335672	0.00721114
ENSGALG00000010349	POLR1C	5324.74	-1.04972	0.0645198	1.82e-60	2.35e-58
ENSGALG00000040479	P2RX3	36.3933	-1.0497	0.392689	0.000769589	0.00183881
ENSGALG00000055042		5.61971	-1.04965	0.910237	0.00592408	0.0121571
ENSGALG00000008139	EML6	60.036	-1.04955	0.386	0.000674284	0.00162241
ENSGALG00000010177	ZFC3H1	6641.22	-1.04942	0.121846	8.03e-19	8.41e-18
ENSGALG00000052850		9.76856	-1.04912	0.623114	0.00677002	0.013758
ENSGALG00000051887		42.2112	-1.04857	0.371061	0.000492369	0.00120836
ENSGALG00000019042	ALG8	1504.56	-1.04817	0.11791	6.92e-20	7.91e-19
ENSGALG00000051790		4.53227	-1.04776	0.777941	0.00812135	0.0162518
ENSGALG00000011176	SCRN1	78.7808	-1.04711	0.338412	0.000211279	0.000544588
ENSGALG00000011594	NR1H4	16.4477	-1.04685	0.725794	0.00826409	0.0165087
ENSGALG00000037735	CenpA	982.579	-1.04615	0.147133	1.31e-13	8.89e-13
ENSGALG00000048865		340.007	-1.04429	0.205589	4.28e-08	1.7e-07
ENSGALG00000054241		37.3246	-1.04272	0.469963	0.00256959	0.00563448
ENSGALG00000040291		6197.23	-1.04265	0.090653	1.49e-31	4e-30
ENSGALG00000027716		105.099	-1.04206	0.232851	8.64e-07	2.98e-06
ENSGALG00000039209	WIF1	56.34	-1.04173	0.421236	0.00137132	0.00314715
ENSGALG00000054125		934.462	-1.04136	0.111524	1.14e-21	1.5e-20
ENSGALG00000005842	GDPD2	15.9816	-1.04132	0.665109	0.00792999	0.0158926
ENSGALG00000045136	POLG	4415.46	-1.04114	0.133033	5.79e-16	4.76e-15
ENSGALG00000002487	SFSWAP	9171.35	-1.04092	0.148258	2.54e-13	1.68e-12
ENSGALG00000011880	BBS7	2721.51	-1.04028	0.127935	4.91e-17	4.43e-16
ENSGALG00000036908		113.522	-1.04017	0.240213	1.69e-06	5.65e-06
ENSGALG00000029618		8.95095	-1.03986	0.55584	0.00529431	0.0109512
ENSGALG00000048246		257.806	-1.03887	0.166916	5.61e-11	3.01e-10
ENSGALG00000001981	PARP6	1789.62	-1.03845	0.140474	1.67e-14	1.22e-13
ENSGALG00000033231	RACGAP1	14419.7	-1.03845	0.048512	1.37e-102	6.12e-100
ENSGALG00000001551	CCNL2	12654.9	-1.03828	0.11928	3.71e-19	4e-18
ENSGALG00000051396		184.074	-1.03798	0.24271	2.17e-06	7.13e-06
ENSGALG00000012971	CCDC170	24.085	-1.03778	0.593163	0.00648313	0.0132217
ENSGALG00000001014	ARPC5L	1795.86	-1.03775	0.0962475	4.88e-28	1.03e-26
ENSGALG00000054572		531.817	-1.03751	0.15781	5.68e-12	3.34e-11
ENSGALG00000035031	HEY1	290.821	-1.03748	0.189327	4.93e-09	2.18e-08
ENSGALG00000045036		178.416	-1.03696	0.227903	6.18e-07	2.17e-06
ENSGALG00000052469		14.7299	-1.03661	0.433284	0.00171967	0.00388164
ENSGALG00000044654	C22orf39	4186.8	-1.03635	0.103981	2.5e-24	4.06e-23
ENSGALG00000038727		159.414	-1.03591	0.27354	1.74e-05	5.14e-05
ENSGALG00000007814		16.4442	-1.03494	0.609003	0.00703316	0.0142388
ENSGALG00000049461	BG8	111.556	-1.03459	0.368428	0.000543862	0.00132429
ENSGALG00000005668	WSB1	42131.8	-1.03235	0.20702	7.2e-08	2.82e-07
ENSGALG00000007184	FEZF2	4.98125	-1.03169	1.10732	0.00217898	0.0048306
ENSGALG00000011141	ITGB6	26.8926	-1.03097	0.489524	0.00344794	0.00738837
ENSGALG00000019835	TRIM27.2	24.9784	-1.02989	0.557658	0.00573212	0.0117932
ENSGALG00000050796		2969.42	-1.02986	0.133713	1.6e-15	1.27e-14
ENSGALG00000050566		14.6219	-1.02975	0.73464	0.009032	0.0179182
ENSGALG00000051515		5.7541	-1.02962	1.02343	0.00364808	0.00777584
ENSGALG00000027050	SENP8	734.406	-1.0295	0.108603	3.05e-22	4.26e-21
ENSGALG00000000638	UTP4	2157.41	-1.02948	0.104391	7.29e-24	1.14e-22
ENSGALG00000032840		1118.44	-1.02921	0.194171	1.37e-08	5.77e-08
ENSGALG00000052986		1034.91	-1.02863	0.173442	3.6e-10	1.78e-09
ENSGALG00000035375	LRTOMT	122.264	-1.02849	0.347183	0.000344136	0.000862724
ENSGALG00000001876	RASA4B	974.465	-1.02823	0.140667	3.21e-14	2.29e-13
ENSGALG00000048150		414.269	-1.02801	0.165365	6.08e-11	3.25e-10
ENSGALG00000054415		1076.73	-1.028	0.275218	2.19e-05	6.4e-05
ENSGALG00000011947	POLR3H	2495.65	-1.02789	0.122584	6.08e-18	5.96e-17
ENSGALG00000003720	FANCD2	8796.31	-1.02776	0.0742367	1.66e-44	9.33e-43
ENSGALG00000035923	MTMR11	3614.16	-1.02633	0.125168	2.91e-17	2.67e-16
ENSGALG00000008538	GINS1	2150.55	-1.02545	0.0880237	2.79e-32	7.79e-31
ENSGALG00000031338		30.8745	-1.02462	0.434419	0.00195162	0.00435959
ENSGALG00000052327		9.91655	-1.02384	0.792417	0.00891386	0.0177013
ENSGALG00000002239	REXO5	4009.11	-1.02378	0.127103	9.68e-17	8.54e-16
ENSGALG00000014030	CASC1	73.3433	-1.02296	0.29481	6.13e-05	0.000169747
ENSGALG00000047303		497.326	-1.02258	0.144132	1.58e-13	1.06e-12
ENSGALG00000032465	ATP8	71460.2	-1.02141	0.252358	6.22e-06	1.94e-05
ENSGALG00000050624		10.8048	-1.01935	0.546631	0.00578508	0.0118945
ENSGALG00000052222		50.2462	-1.01919	0.282134	3.63e-05	0.000102958
ENSGALG00000017864		49.9856	-1.01873	0.305843	0.000102807	0.000276228
ENSGALG00000000693	NOB1	3982.81	-1.01777	0.0700412	9.57e-49	6.88e-47
ENSGALG00000000452	TNFRSF10B	14379.4	-1.01747	0.11902	1.54e-18	1.58e-17
ENSGALG00000004416	TTC19	1596.91	-1.01736	0.148757	9.87e-13	6.22e-12
ENSGALG00000053606		56.9496	-1.01731	0.588258	0.00724684	0.0146401
ENSGALG00000016855	ARGLU1	8455.55	-1.01674	0.139783	4.34e-14	3.07e-13
ENSGALG00000054460		158.258	-1.01654	0.325163	0.000209681	0.000541076
ENSGALG00000004424	SEC16B	248.034	-1.0163	0.222395	6e-07	2.11e-06
ENSGALG00000036229	ND4	245902	-1.0162	0.267503	1.77e-05	5.22e-05
ENSGALG00000038810		1398.8	-1.01596	0.0904905	3.74e-30	9.2e-29
ENSGALG00000017418	NPTX1	34.1471	-1.01512	0.53422	0.005517	0.0113826
ENSGALG00000043768	MT-ND2	222820	-1.01453	0.258852	1.09e-05	3.3e-05
ENSGALG00000018237	MIRLET7I	3.36859	-1.01408	0.771226	0.00956691	0.0189002
ENSGALG00000051488	SFI1	2249.1	-1.01401	0.151335	2.6e-12	1.58e-11
ENSGALG00000031572		3544.72	-1.01368	0.131288	1.45e-15	1.15e-14
ENSGALG00000051828		3.01659	-1.01305	1.06319	0.00294431	0.00638483
ENSGALG00000028326	HSD11B2	67.6034	-1.01229	0.297586	8.14e-05	0.00022154
ENSGALG00000046953		250.78	-1.01226	0.152611	4.14e-12	2.47e-11
ENSGALG00000047826		4.53981	-1.01218	1.07215	0.00278342	0.00606371
ENSGALG00000016508		435.055	-1.01194	0.168601	2.45e-10	1.23e-09
ENSGALG00000038614	SNORA81	218.959	-1.01113	0.18615	7.02e-09	3.04e-08
ENSGALG00000007556	ORAOV1	1560.35	-1.01109	0.120407	5.78e-18	5.68e-17
ENSGALG00000051924		50.1399	-1.00903	0.364611	0.000668477	0.00160964
ENSGALG00000052998		5.95432	-1.00842	0.909022	0.00682361	0.0138494
ENSGALG00000009431	PLEKHD1	322.92	-1.00678	0.222057	7.34e-07	2.55e-06
ENSGALG00000050870	NPM2	1629.24	-1.00634	0.129273	8.98e-16	7.26e-15
ENSGALG00000038527	CARMIL3	573.205	-1.00588	0.204079	1.05e-07	4.04e-07
ENSGALG00000042297	ANKRD13D	7508.23	-1.00576	0.10582	2.59e-22	3.63e-21
ENSGALG00000048639		195.679	-1.00544	0.23299	2.02e-06	6.67e-06
ENSGALG00000005458	RPL3L	25.7318	-1.00511	0.551564	0.0065716	0.0133818
ENSGALG00000046853		2.84777	-1.00505	1.06247	0.00298755	0.00646901
ENSGALG00000035976		225.064	-1.00398	0.171334	5.97e-10	2.9e-09
ENSGALG00000050576		148.016	-1.00396	0.253393	9.42e-06	2.88e-05
ENSGALG00000049626	KIFC1	14262.5	-1.0038	0.0554959	5.16e-74	1e-71
ENSGALG00000015712	SLBP	1655.47	-1.00365	0.0807823	2.51e-36	9.07e-35
ENSGALG00000029135	YEATS4	3098.35	-1.00255	0.102421	1.64e-23	2.52e-22
ENSGALG00000047462		94.4008	-1.00153	0.248231	7e-06	2.17e-05
ENSGALG00000013247		129.428	-0.999542	0.207379	1.87e-07	6.96e-07
ENSGALG00000036373	GSG1L	8.4063	-0.99916	0.672993	0.0101814	0.0200086
ENSGALG00000049856		5.41955	-0.998773	0.930333	0.00640308	0.0130684
ENSGALG00000040585		12.3009	-0.998408	0.831428	0.00919103	0.0182157
ENSGALG00000036976	DALRD3	2297.56	-0.998208	0.0957573	2.53e-26	4.78e-25
ENSGALG00000010979		2642.8	-0.99798	0.0881531	1.36e-30	3.44e-29
ENSGALG00000017829		6.23258	-0.997977	0.587987	0.00819814	0.0163932
ENSGALG00000039473	NOP53	13438.2	-0.99797	0.066722	1.85e-51	1.49e-49
ENSGALG00000044388		11.6626	-0.997395	0.777659	0.0102556	0.0201371
ENSGALG00000027980	NANOS1	2981.49	-0.997036	0.114236	3.43e-19	3.72e-18
ENSGALG00000036621	ZCCHC4	2471.28	-0.996149	0.104827	2.71e-22	3.8e-21
ENSGALG00000046419		34.3102	-0.99547	0.647515	0.00995398	0.0195855
ENSGALG00000051601		22.6288	-0.995249	0.392118	0.00134677	0.00309478
ENSGALG00000046866		26.6906	-0.994826	0.633314	0.00967534	0.0190886
ENSGALG00000015213	TPPP2	7.13976	-0.994766	0.858093	0.00863084	0.017188
ENSGALG00000025810	CCNB3	18743.3	-0.994721	0.0693704	1.66e-47	1.1e-45
ENSGALG00000008498	MALRD1	70.6474	-0.993772	0.37549	0.00100001	0.00234481
ENSGALG00000049498		332.54	-0.993467	0.153183	1.18e-11	6.76e-11
ENSGALG00000040995		351.63	-0.992932	0.274714	3.92e-05	0.000110651
ENSGALG00000005425	OGT	14065.7	-0.992387	0.192773	3.51e-08	1.41e-07
ENSGALG00000040045	DBH	4.9557	-0.992163	0.963682	0.00551803	0.0113833
ENSGALG00000051549		41.1931	-0.991482	0.568413	0.00785509	0.0157503
ENSGALG00000047113		455.143	-0.990705	0.260601	1.9e-05	5.58e-05
ENSGALG00000033575	EIF2B4	2763.81	-0.990005	0.0839301	5.57e-33	1.61e-31
ENSGALG00000031511	HIP1R	3492.35	-0.989718	0.132386	1.04e-14	7.76e-14
ENSGALG00000044799	VSIG4	60.8424	-0.989647	0.404402	0.0017512	0.00394529
ENSGALG00000047172		17.7502	-0.988971	0.396244	0.00154234	0.00350515
ENSGALG00000049832		70.637	-0.988693	0.320045	0.000259741	0.000661244
ENSGALG00000035690	RAPGEFL1	454.655	-0.987438	0.182189	8.09e-09	3.49e-08
ENSGALG00000007539	ANKRD2	88.3139	-0.987406	0.252253	1.21e-05	3.66e-05
ENSGALG00000015017		827.161	-0.987335	0.190432	2.93e-08	1.19e-07
ENSGALG00000054976	IL11	158.183	-0.987239	0.255143	1.46e-05	4.35e-05
ENSGALG00000051506		14.4202	-0.986212	0.695495	0.0111669	0.0218201
ENSGALG00000028059	gga-mir-196-4	50.8779	-0.985516	0.267598	3.09e-05	8.84e-05
ENSGALG00000009473	EFCAB1	54.1098	-0.984944	0.296259	0.000117304	0.000312416
ENSGALG00000011058	LEPR	87.3177	-0.984552	0.332855	0.000403189	0.00100234
ENSGALG00000044431	NPB	304.272	-0.984268	0.204622	2.06e-07	7.63e-07
ENSGALG00000001651	TTI2	3926.61	-0.984217	0.0750296	3.6e-40	1.57e-38
ENSGALG00000004483	AHSA2	2868.7	-0.983838	0.0990309	4.06e-24	6.51e-23
ENSGALG00000012836		14787.4	-0.983818	0.0702756	2.17e-45	1.29e-43
ENSGALG00000053319		13.5906	-0.983496	0.607119	0.00961935	0.0189875
ENSGALG00000002784	APEH	7978.19	-0.98336	0.0942031	2.28e-26	4.33e-25
ENSGALG00000030051	TOP3B	4457.35	-0.982981	0.110543	8.29e-20	9.42e-19
ENSGALG00000006779	PDZD3	164.24	-0.982761	0.203918	1.98e-07	7.35e-07
ENSGALG00000017926	7SK	490.024	-0.982741	0.441981	0.0031334	0.00675845
ENSGALG00000054154		2881.48	-0.982321	0.0995544	8.02e-24	1.26e-22
ENSGALG00000004622	SPOUT1	2968.02	-0.982197	0.0707114	1.01e-44	5.74e-43
ENSGALG00000032799		1302.29	-0.981725	0.0810806	1.33e-34	4.32e-33
ENSGALG00000031714		46.8725	-0.981029	0.35107	0.000676544	0.00162736
ENSGALG00000017040		27.8666	-0.980695	0.43773	0.00303179	0.00655863
ENSGALG00000049516		869.596	-0.980316	0.182127	1.02e-08	4.34e-08
ENSGALG00000054579		96.5327	-0.979846	0.324381	0.000334753	0.000840513
ENSGALG00000009280	NPY2R	16.0522	-0.979337	0.547783	0.00768723	0.0154464
ENSGALG00000011353	TNNI3K	30.5606	-0.978787	0.461162	0.00400457	0.00846507
ENSGALG00000041744	OTOS	237.881	-0.978728	0.173817	2.5e-09	1.14e-08
ENSGALG00000003217	LITAF	12.7531	-0.978042	0.72672	0.0117143	0.0227984
ENSGALG00000048399		90.0282	-0.977867	0.373743	0.00114883	0.00267043
ENSGALG00000006868	CRACR2B	49.1093	-0.977445	0.510029	0.00616023	0.0126063
ENSGALG00000029494	BGLAP	442.84	-0.977288	0.160909	1.76e-10	8.94e-10
ENSGALG00000001666	RPAIN	952.567	-0.976721	0.0937203	2.79e-26	5.26e-25
ENSGALG00000041854	FAM184B	126.785	-0.976462	0.263507	2.91e-05	8.35e-05
ENSGALG00000051057		20.1142	-0.975829	0.601153	0.00989231	0.0194785
ENSGALG00000030118	PCGF1	1416.4	-0.975116	0.152056	2.02e-11	1.14e-10
ENSGALG00000027899		2794.68	-0.974222	0.132781	3.11e-14	2.22e-13
ENSGALG00000052786		1328.77	-0.974139	0.194618	7.88e-08	3.06e-07
ENSGALG00000048579		24.6403	-0.973902	0.486799	0.0052855	0.0109344
ENSGALG00000000242	EBF2	169.653	-0.973846	0.248298	1.23e-05	3.7e-05
ENSGALG00000054505		4365.77	-0.972758	0.0950274	1.95e-25	3.46e-24
ENSGALG00000021938	SNORA72	13.6171	-0.972582	0.583181	0.00946455	0.0187255
ENSGALG00000029500	ND5	294724	-0.972546	0.267459	3.86e-05	0.000108831
ENSGALG00000044406		57.1366	-0.972365	0.381979	0.00142515	0.00325816
ENSGALG00000026278		4330.79	-0.972126	0.105649	5.06e-21	6.29e-20
ENSGALG00000053999	VPS37D	73.6874	-0.971756	0.324731	0.000376516	0.00093951
ENSGALG00000037071		86.9238	-0.970876	0.343289	0.000631691	0.00152586
ENSGALG00000008803		1833.72	-0.970659	0.0960449	7.47e-25	1.27e-23
ENSGALG00000005903	NRIP3	26.9414	-0.969421	0.439213	0.00341048	0.00731688
ENSGALG00000026164	gga-mir-6575	5.42552	-0.969393	0.673	0.0119903	0.0232933
ENSGALG00000034196	WNT2B	23.272	-0.969218	0.411874	0.00239187	0.00526558
ENSGALG00000048261	HES6	804.144	-0.969188	0.118952	5.36e-17	4.82e-16
ENSGALG00000042168		49.6757	-0.969071	0.309873	0.000243993	0.000623522
ENSGALG00000015884	MIS18A	2117.8	-0.969049	0.087157	1.48e-29	3.45e-28
ENSGALG00000042750	ND1	298548	-0.968764	0.257947	2.45e-05	7.09e-05
ENSGALG00000051116		3.02389	-0.968749	1.08768	0.00260592	0.00571026
ENSGALG00000025694		11.5404	-0.968466	0.491076	0.00571095	0.0117526
ENSGALG00000053135		266.391	-0.968137	0.212644	7.6e-07	2.64e-06
ENSGALG00000014277	RHOH	40.8278	-0.967857	0.402443	0.00210528	0.00468076
ENSGALG00000050508	NOS3	156.491	-0.967765	0.265583	3.8e-05	0.000107426
ENSGALG00000026638	RELL2	241.04	-0.967731	0.227697	3.06e-06	9.88e-06
ENSGALG00000005643	LYVE1	284.559	-0.967226	0.242959	9.8e-06	2.99e-05
ENSGALG00000027909	GPN2	4731.85	-0.967152	0.103239	1.08e-21	1.43e-20
ENSGALG00000037497	CABP2	770.498	-0.966996	0.170014	1.87e-09	8.62e-09
ENSGALG00000030460	TBC1D31	2689.54	-0.966767	0.133239	5.81e-14	4.06e-13
ENSGALG00000010745	HMGB2	22852.3	-0.966554	0.0533031	2.55e-74	5.01e-72
ENSGALG00000034413	PIAS4	1588.15	-0.966464	0.0910086	3.54e-27	7.03e-26
ENSGALG00000048631		40.7744	-0.965795	0.526053	0.00745815	0.0150387
ENSGALG00000044536	WDR13	8797.37	-0.965533	0.106517	1.83e-20	2.17e-19
ENSGALG00000006388	IL16	1336.69	-0.965243	0.184714	2.53e-08	1.03e-07
ENSGALG00000007665	POLE	7563.88	-0.965052	0.0954451	7.24e-25	1.23e-23
ENSGALG00000032644		5035.17	-0.964935	0.112305	1.25e-18	1.3e-17
ENSGALG00000010478	STIL	902.021	-0.964478	0.143385	2.55e-12	1.55e-11
ENSGALG00000042132	SUGP1	3223.57	-0.963808	0.141908	1.63e-12	1.01e-11
ENSGALG00000020340	TMX1	181.841	-0.963732	0.187579	4.07e-08	1.62e-07
ENSGALG00000048377		128.914	-0.96339	0.256387	2.47e-05	7.16e-05
ENSGALG00000030542	SEMA6D	31.5918	-0.9633	0.408275	0.00240253	0.00528759
ENSGALG00000025882	BUD13	4535.89	-0.963256	0.0837542	1.93e-31	5.14e-30
ENSGALG00000053678		1259.96	-0.961864	0.149241	1.71e-11	9.66e-11
ENSGALG00000031996		103.892	-0.961352	0.307643	0.000252298	0.000643212
ENSGALG00000032149	OSBPL7	3024.69	-0.960743	0.0949508	6.82e-25	1.16e-23
ENSGALG00000052016	ADRA2B	918.437	-0.959903	0.150465	2.64e-11	1.47e-10
ENSGALG00000006842	ACOT8	3974.09	-0.959816	0.0667759	1.13e-47	7.56e-46
ENSGALG00000051449		21.5287	-0.958946	0.530693	0.0080501	0.0161232
ENSGALG00000005861		208.206	-0.958937	0.212726	9.68e-07	3.32e-06
ENSGALG00000012691	ALDH1L2	14.6663	-0.958912	0.496215	0.00639617	0.0130559
ENSGALG00000052329	PEX11B	454.969	-0.958375	0.135125	1.97e-13	1.32e-12
ENSGALG00000046976		85.5078	-0.958247	0.302248	0.000218627	0.000562538
ENSGALG00000031238	SLIRP	3695.8	-0.958044	0.104084	5.15e-21	6.39e-20
ENSGALG00000053485		5.08041	-0.957503	1.10685	0.00228989	0.00505698
ENSGALG00000027874	CHAC1	1424.01	-0.957272	0.133266	1.02e-13	6.99e-13
ENSGALG00000053775		4.83253	-0.955951	0.696913	0.0130978	0.0252317
ENSGALG00000049318		128.567	-0.955402	0.220246	2.15e-06	7.07e-06
ENSGALG00000011717		40.6526	-0.954974	0.466737	0.00514627	0.0106656
ENSGALG00000048448		324.433	-0.954962	0.203352	3.98e-07	1.43e-06
ENSGALG00000053125		15.5913	-0.954889	0.514872	0.00751564	0.0151394
ENSGALG00000015810		7.85461	-0.954607	0.980407	0.00545206	0.0112573
ENSGALG00000000891	NSUN5	1619.33	-0.953947	0.0830061	2.19e-31	5.83e-30
ENSGALG00000002561		1800.14	-0.952939	0.0954829	2.84e-24	4.6e-23
ENSGALG00000002266	OGDHL	46.9342	-0.951946	0.390592	0.00204315	0.00455268
ENSGALG00000025633		8.84485	-0.951822	0.601565	0.0114853	0.0223906
ENSGALG00000046326	IL1R2	407.655	-0.951561	0.115939	3.46e-17	3.16e-16
ENSGALG00000048410		9.63762	-0.951188	0.771338	0.0127679	0.0246669
ENSGALG00000047052		6.04002	-0.950998	0.65627	0.0130012	0.0250605
ENSGALG00000050158		1994.35	-0.95063	0.115126	2.29e-17	2.13e-16
ENSGALG00000037283	CUTC	1471.1	-0.950548	0.0914506	4.06e-26	7.55e-25
ENSGALG00000049270		3103.27	-0.95014	0.115274	2.6e-17	2.41e-16
ENSGALG00000025355		16.1958	-0.94953	0.448202	0.00447927	0.00940185
ENSGALG00000002525	RASGEF1A	115.155	-0.948909	0.253479	2.74e-05	7.89e-05
ENSGALG00000049898	gga-mir-12288	14.9503	-0.948436	0.467088	0.00544436	0.0112428
ENSGALG00000031553	KIF18B	6212.81	-0.947675	0.047763	2.04e-88	6.21e-86
ENSGALG00000042794	ZFAND1	1324.97	-0.945886	0.107516	2.18e-19	2.4e-18
ENSGALG00000017855		31.0685	-0.945873	0.414313	0.00308563	0.00666703
ENSGALG00000013858	CEP76	765.976	-0.94571	0.138627	1.4e-12	8.72e-12
ENSGALG00000050287		3.333	-0.945639	1.04955	0.00347275	0.00743581
ENSGALG00000053921		35.7704	-0.945192	0.400126	0.00253779	0.0055693
ENSGALG00000036040		12.0359	-0.945093	0.630036	0.0128532	0.0248228
ENSGALG00000036297	ABHD8	336.493	-0.944755	0.166709	2.27e-09	1.04e-08
ENSGALG00000036234	RFWD3	2602	-0.944505	0.0651741	2.14e-48	1.5e-46
ENSGALG00000000048		140.182	-0.944487	0.247692	2.1e-05	6.15e-05
ENSGALG00000012119	MARCO	4.66561	-0.944246	1.01631	0.00439102	0.00923227
ENSGALG00000049063	INAFM2	1090.25	-0.944063	0.150475	5.52e-11	2.97e-10
ENSGALG00000011368	ZNF839	4499.73	-0.943779	0.132877	1.92e-13	1.29e-12
ENSGALG00000007992	GGA3	6630.06	-0.94373	0.148755	3.51e-11	1.93e-10
ENSGALG00000046585		14.9031	-0.943405	0.750967	0.013614	0.0261384
ENSGALG00000053403		32.1371	-0.942598	0.514627	0.00820307	0.016397
ENSGALG00000011259	RPE65	125.849	-0.942303	0.248661	2.33e-05	6.77e-05
ENSGALG00000038817	CKS2	940.329	-0.941654	0.139283	2.17e-12	1.33e-11
ENSGALG00000010636	PRIMPOL	686.3	-0.940317	0.123269	3.79e-15	2.92e-14
ENSGALG00000035254		3584	-0.940035	0.133521	3.05e-13	2.01e-12
ENSGALG00000044705	TIMM50	6851.33	-0.939403	0.0739383	8.84e-38	3.39e-36
ENSGALG00000021733	gga-mir-21	40.8441	-0.938849	0.301835	0.000285123	0.000721979
ENSGALG00000052902		7.93328	-0.938785	0.535963	0.00954106	0.0188699
ENSGALG00000008047		5.53948	-0.938654	1.04092	0.00371796	0.00790517
ENSGALG00000038325	CORO7	7961.84	-0.938324	0.0761436	1.09e-35	3.86e-34
ENSGALG00000034042	PIAS3	2152.98	-0.937893	0.115135	6.03e-17	5.4e-16
ENSGALG00000007155	RMI2	1611.35	-0.937328	0.119352	6.5e-16	5.31e-15
ENSGALG00000038469	CDC25A	2123.01	-0.937217	0.0705316	4.38e-41	1.99e-39
ENSGALG00000047011		9.53697	-0.937034	0.472883	0.00627994	0.0128382
ENSGALG00000032142	MT-CO1	1.16417e+06	-0.936669	0.24048	1.55e-05	4.6e-05
ENSGALG00000031197		744.467	-0.936221	0.198616	3.88e-07	1.39e-06
ENSGALG00000003318	SNRNP35	1183.99	-0.936056	0.145726	2.14e-11	1.2e-10
ENSGALG00000048365	GPATCH4	3354.35	-0.935666	0.0961827	3.7e-23	5.55e-22
ENSGALG00000000909	GFAP	90.226	-0.935157	0.297411	0.000257645	0.000656041
ENSGALG00000029199	WDR55	3258.72	-0.93461	0.0942607	5.81e-24	9.2e-23
ENSGALG00000055047		375.379	-0.934181	0.193645	2.26e-07	8.34e-07
ENSGALG00000012454	CYTH4	203.602	-0.933727	0.201736	5.92e-07	2.08e-06
ENSGALG00000037619	HOXB6	1412.92	-0.933468	0.137057	1.58e-12	9.77e-12
ENSGALG00000030661	STAT2	3268.02	-0.932315	0.12388	8.55e-15	6.44e-14
ENSGALG00000002167	PATL2	1497.57	-0.931926	0.0930263	2.08e-24	3.4e-23
ENSGALG00000005517	KIF9	231.761	-0.931753	0.237853	1.43e-05	4.29e-05
ENSGALG00000010402	HPGDS	24237	-0.931665	0.0862978	5.9e-28	1.24e-26
ENSGALG00000045037	CYP2W1	77.8378	-0.931488	0.261735	5.92e-05	0.000164324
ENSGALG00000038096	NOS2	1449.56	-0.93143	0.213053	1.99e-06	6.58e-06
ENSGALG00000001663	MAK16	6706.01	-0.931034	0.0595425	6.76e-56	6.93e-54
ENSGALG00000047735		1424.74	-0.930721	0.16902	5.97e-09	2.61e-08
ENSGALG00000038416		2070.74	-0.930604	0.114537	7.36e-17	6.54e-16
ENSGALG00000053262	HIST2H4B	286.379	-0.930539	0.142721	1.15e-11	6.61e-11
ENSGALG00000028759	LYPD6B	42.8752	-0.930389	0.42624	0.00413636	0.00872762
ENSGALG00000041514		2930.09	-0.928976	0.0694319	1.32e-41	6.13e-40
ENSGALG00000002638		690.694	-0.928795	0.231717	9.91e-06	3.02e-05
ENSGALG00000013926	DCLRE1C	1211.89	-0.927482	0.185165	9.01e-08	3.48e-07
ENSGALG00000050497		46.7639	-0.927452	0.413275	0.00361313	0.0077085
ENSGALG00000048209		369.986	-0.926092	0.394106	0.0027953	0.00608629
ENSGALG00000036955	NEDD8	2604.52	-0.925825	0.106547	6.09e-19	6.47e-18
ENSGALG00000008945	NEXN	44.1394	-0.925558	0.355602	0.0014226	0.00325463
ENSGALG00000012468	PRPF39	10163	-0.925331	0.147728	6.27e-11	3.34e-10
ENSGALG00000053120		5.1905	-0.924758	0.915899	0.00849538	0.0169476
ENSGALG00000049780		6909.14	-0.924747	0.106258	5.43e-19	5.79e-18
ENSGALG00000011473	RPS6KA2	68.9787	-0.924589	0.404235	0.00328533	0.00706815
ENSGALG00000008045	SLC9A8	890.213	-0.924356	0.203857	9.57e-07	3.29e-06
ENSGALG00000005290	TRMT13	1258.79	-0.924113	0.1689	7.45e-09	3.22e-08
ENSGALG00000016931	BORA	1417.91	-0.923878	0.103436	7.04e-20	8.03e-19
ENSGALG00000017846		23.9758	-0.923339	0.345281	0.00116904	0.00271311
ENSGALG00000044224		112.912	-0.923179	0.324459	0.000702256	0.00168518
ENSGALG00000054173		885.752	-0.922383	0.105649	4.28e-19	4.6e-18
ENSGALG00000043133	gga-mir-1564	60.3311	-0.922338	0.249075	3.51e-05	9.97e-05
ENSGALG00000014443	IFFO1	2559.46	-0.922114	0.112366	3.86e-17	3.5e-16
ENSGALG00000045137		8.12284	-0.922041	0.601188	0.013754	0.0263694
ENSGALG00000011961	TNIP3	10.3263	-0.921977	0.735589	0.0153188	0.0291405
ENSGALG00000002116	TEN1	155.912	-0.921849	0.220639	4.89e-06	1.55e-05
ENSGALG00000006253	ILKAP	3998.16	-0.921848	0.0830767	2.22e-29	5.13e-28
ENSGALG00000012378	KATNA1	2892.22	-0.921101	0.073697	1.29e-36	4.72e-35
ENSGALG00000002319	TEKT2	275.186	-0.921101	0.201505	8.13e-07	2.81e-06
ENSGALG00000002099		2052.97	-0.921042	0.161454	1.97e-09	9.06e-09
ENSGALG00000024495	gga-mir-16c	6.84857	-0.920657	0.603081	0.0139399	0.0267004
ENSGALG00000047215		1754.07	-0.920631	0.136179	2.33e-12	1.42e-11
ENSGALG00000039448	NCAPD2	8813.18	-0.91996	0.0570048	2.34e-59	2.86e-57
ENSGALG00000007314	DSCAML1	9.74796	-0.919855	0.576808	0.0129254	0.0249412
ENSGALG00000044641	DAPL1	290.254	-0.919827	0.145874	4.87e-11	2.64e-10
ENSGALG00000009421	SRSF5	11359.8	-0.918137	0.146003	5.48e-11	2.95e-10
ENSGALG00000052515		1523.99	-0.916938	0.0972329	7.04e-22	9.51e-21
ENSGALG00000004845	TIMM10	2454.24	-0.916726	0.125181	4.16e-14	2.94e-13
ENSGALG00000029760	NRBP2	891.616	-0.915784	0.148546	1.21e-10	6.28e-10
ENSGALG00000028803	B3GNT4	212.993	-0.915774	0.294491	0.000308517	0.000778279
ENSGALG00000051480		36.2145	-0.915157	0.523212	0.010492	0.0205687
ENSGALG00000013879	TIA1	18544.4	-0.914923	0.10818	4.74e-18	4.68e-17
ENSGALG00000046915	PPP1R12C	2601.04	-0.914652	0.14819	1.16e-10	6.03e-10
ENSGALG00000008896	PPP1R1C	26.5917	-0.914632	0.39336	0.00309354	0.00668053
ENSGALG00000025646		6.15114	-0.914374	0.625102	0.0152085	0.0289443
ENSGALG00000052765		2267.45	-0.914296	0.0991919	5.29e-21	6.53e-20
ENSGALG00000012984		40.013	-0.913687	0.399149	0.00339523	0.00728804
ENSGALG00000020210	CENPU	2303.76	-0.913624	0.0824566	2.73e-29	6.27e-28
ENSGALG00000052702		1456.25	-0.913561	0.100212	1.35e-20	1.61e-19
ENSGALG00000031196		9.42129	-0.913266	0.680966	0.0162862	0.0308349
ENSGALG00000013893	MNS1	605.258	-0.912269	0.166217	7.04e-09	3.05e-08
ENSGALG00000006963	ENDOV	1904.39	-0.911488	0.110668	3.11e-17	2.86e-16
ENSGALG00000030247	TMOD4	579.403	-0.910501	0.283495	0.000222222	0.000571149
ENSGALG00000050771	gga-mir-12282	10.0984	-0.910452	0.491413	0.00889976	0.0176754
ENSGALG00000004885	SLC24A5	361.997	-0.909778	0.167312	9.45e-09	4.04e-08
ENSGALG00000050943	RNF19B	2231.69	-0.909622	0.0819609	2.26e-29	5.23e-28
ENSGALG00000054905		22.9905	-0.908995	0.490427	0.00893535	0.0177417
ENSGALG00000036110		202.567	-0.908821	0.177966	5.74e-08	2.26e-07
ENSGALG00000009392	TLR5	14.5338	-0.908655	0.638946	0.0160826	0.0304746
ENSGALG00000001604		1110.29	-0.908386	0.0932288	3.48e-23	5.22e-22
ENSGALG00000004146	RIMS4	23.5678	-0.908319	0.590908	0.0145263	0.0277609
ENSGALG00000048648		52.4628	-0.908197	0.287579	0.000268862	0.000683385
ENSGALG00000053808		19.0859	-0.907338	0.500044	0.00965385	0.0190509
ENSGALG00000026589	gga-mir-6663	5.13574	-0.907264	0.719712	0.0166703	0.0315103
ENSGALG00000032270	NCAPH	14705.2	-0.907144	0.0614331	4.3e-50	3.3e-48
ENSGALG00000053055		8.41341	-0.90695	0.965325	0.00658274	0.0134011
ENSGALG00000040739	TXNL4A	1261.62	-0.906695	0.0817388	2.43e-29	5.59e-28
ENSGALG00000050634		615.938	-0.906634	0.216424	4.9e-06	1.55e-05
ENSGALG00000007109	APOA4	66.4004	-0.906569	0.314935	0.000669565	0.00161202
ENSGALG00000036935		3851.49	-0.90622	0.106096	2.36e-18	2.39e-17
ENSGALG00000034244		67.1212	-0.905685	0.229452	1.38e-05	4.14e-05
ENSGALG00000031629	RPS6KB2	4423.62	-0.905579	0.0732892	8.08e-36	2.87e-34
ENSGALG00000053243		633.522	-0.905572	0.164759	6.88e-09	2.99e-08
ENSGALG00000049002		6.93437	-0.905321	0.866553	0.0114849	0.0223906
ENSGALG00000006323	LECT2	25.8869	-0.904963	0.379947	0.00276811	0.00603363
ENSGALG00000039071		897.608	-0.904475	0.160144	2.9e-09	1.31e-08
ENSGALG00000025817	NHLH1	58.6149	-0.904459	0.344538	0.00143322	0.00327567
ENSGALG00000006658	FANCI	3038.05	-0.904164	0.123099	3.69e-14	2.62e-13
ENSGALG00000052261		860.114	-0.903333	0.136257	6.04e-12	3.55e-11
ENSGALG00000001017	WRAP73	3750.32	-0.903171	0.0971678	2.66e-21	3.39e-20
ENSGALG00000002123	OSCP1	2297.9	-0.902748	0.139593	1.8e-11	1.01e-10
ENSGALG00000040313		28.0892	-0.902276	0.375385	0.00264016	0.0057782
ENSGALG00000035027		571.576	-0.902024	0.226403	1.2e-05	3.62e-05
ENSGALG00000051082		1079.87	-0.901716	0.111885	1.39e-16	1.21e-15
ENSGALG00000011970	CHADL	398.826	-0.901562	0.171359	2.57e-08	1.05e-07
ENSGALG00000049068	ZNF831	4.09281	-0.899897	1.04067	0.00383659	0.00813671
ENSGALG00000028817	OTX1	303.925	-0.899515	0.166335	1.15e-08	4.89e-08
ENSGALG00000007900	COMMD3	3800.64	-0.898629	0.0917261	2.13e-23	3.25e-22
ENSGALG00000053788	TNFSF8	29.7263	-0.898522	0.418384	0.00501335	0.0104236
ENSGALG00000032916		6698.12	-0.898272	0.118502	6.31e-15	4.79e-14
ENSGALG00000006078	PALB2	918.694	-0.898152	0.0879245	3.12e-25	5.48e-24
ENSGALG00000053025		1330.9	-0.897736	0.111438	1.45e-16	1.26e-15
ENSGALG00000040828		7274.78	-0.897494	0.10686	8.29e-18	8e-17
ENSGALG00000052613		24.4825	-0.897385	0.487561	0.00955349	0.0188829
ENSGALG00000040172		13.898	-0.896666	0.626617	0.0168843	0.0318586
ENSGALG00000044150		140.554	-0.896657	0.217418	6.72e-06	2.09e-05
ENSGALG00000037256	GTPBP3	1479.45	-0.896631	0.100225	6.79e-20	7.76e-19
ENSGALG00000040771		545.693	-0.896453	0.212857	4.59e-06	1.46e-05
ENSGALG00000001826	WWC1	1671.55	-0.896203	0.135996	8.09e-12	4.69e-11
ENSGALG00000052330		687.885	-0.89551	0.164398	9.39e-09	4.02e-08
ENSGALG00000015478	USP45	4582.91	-0.89486	0.137665	1.48e-11	8.42e-11
ENSGALG00000016438	MELK	2212.43	-0.894349	0.0774664	1.46e-31	3.92e-30
ENSGALG00000000920	CGN	555.155	-0.894042	0.149429	4.05e-10	1.99e-09
ENSGALG00000025583		7.04041	-0.893057	0.558067	0.0143171	0.0273871
ENSGALG00000045499	TCFL5	5.72631	-0.89263	0.966743	0.0066902	0.0136095
ENSGALG00000045738		1768.24	-0.892618	0.120923	2.91e-14	2.09e-13
ENSGALG00000042733		836.653	-0.892563	0.139177	2.65e-11	1.47e-10
ENSGALG00000050746		94.148	-0.892318	0.265539	0.000139999	0.000369498
ENSGALG00000009929	SOST	22.0295	-0.892281	0.571295	0.0150905	0.0287493
ENSGALG00000040157	CHTF18	5766.78	-0.89128	0.0756492	9.12e-33	2.61e-31
ENSGALG00000050120		38.753	-0.89103	0.370502	0.0027332	0.00596469
ENSGALG00000040279	RHCE	492.91	-0.89089	0.193335	7.53e-07	2.61e-06
ENSGALG00000050305		6.48502	-0.890334	0.897938	0.0103012	0.0202217
ENSGALG00000049990		7.50503	-0.889552	0.835971	0.0137862	0.0264249
ENSGALG00000047327		17.6405	-0.889435	0.541667	0.0137021	0.0262794
ENSGALG00000054561		2748.84	-0.889071	0.163059	9.32e-09	3.99e-08
ENSGALG00000005435		7.70879	-0.888355	0.721472	0.0182469	0.0342211
ENSGALG00000031182	FANCM	5172.7	-0.887757	0.140142	4.5e-11	2.45e-10
ENSGALG00000049369		1840.91	-0.887557	0.131065	2.41e-12	1.47e-11
ENSGALG00000030920	APOC3	40.0218	-0.887189	0.474819	0.00941124	0.0186315
ENSGALG00000043209	ADGRB2	888.243	-0.886707	0.118095	1.14e-14	8.48e-14
ENSGALG00000025592	SCARNA14	11.6171	-0.886138	0.484662	0.0101856	0.0200144
ENSGALG00000046885	SCO2	1874.97	-0.886109	0.0957529	4.13e-21	5.17e-20
ENSGALG00000024979	SNORD58	27.8083	-0.885899	0.32727	0.00120413	0.0027893
ENSGALG00000008340	FES	7.31044	-0.88518	0.756306	0.0176412	0.0331664
ENSGALG00000038219	NAA40	6462.2	-0.885059	0.083793	8.54e-27	1.66e-25
ENSGALG00000016685	ASMT	21.5735	-0.885022	0.545552	0.014346	0.0274327
ENSGALG00000045312	SEMA6C	336.327	-0.8847	0.193645	9.28e-07	3.19e-06
ENSGALG00000049775	gga-mir-12227	19.3183	-0.884677	0.381829	0.0034979	0.00748546
ENSGALG00000031024		8.30081	-0.884647	0.7279	0.0184514	0.0345765
ENSGALG00000030614	ADH1C	14.5304	-0.884598	0.5525	0.0147987	0.0282346
ENSGALG00000053412		9.57235	-0.884098	0.515082	0.0124703	0.0241441
ENSGALG00000000625	MAPT	2029.35	-0.883995	0.153722	1.7e-09	7.87e-09
ENSGALG00000002980	RTKN2	435.559	-0.883775	0.178605	1.43e-07	5.39e-07
ENSGALG00000032723	ANKRD13B	1039.93	-0.883026	0.156929	3.51e-09	1.58e-08
ENSGALG00000046649		523.598	-0.882906	0.214915	7.54e-06	2.33e-05
ENSGALG00000008584	NUSAP1	19578	-0.88289	0.0847471	3.97e-26	7.39e-25
ENSGALG00000004493	RSRC2	8201.87	-0.882821	0.0946162	2.04e-21	2.63e-20
ENSGALG00000050720		13.35	-0.882363	0.572414	0.0161179	0.030538
ENSGALG00000052519		5395.35	-0.881798	0.0858472	1.83e-25	3.27e-24
ENSGALG00000020747	MBD4	3260.18	-0.880541	0.0898992	2.31e-23	3.52e-22
ENSGALG00000000541	ZC3H11B	9048.64	-0.880498	0.124765	3.3e-13	2.17e-12
ENSGALG00000005956		31.9423	-0.880027	0.374047	0.00324603	0.00699015
ENSGALG00000043806	DNAH10	88.5976	-0.879868	0.330326	0.0013935	0.00319352
ENSGALG00000040120		759.01	-0.879815	0.155238	2.81e-09	1.27e-08
ENSGALG00000021362	GPRC5C	31.2606	-0.879772	0.543149	0.0147011	0.0280716
ENSGALG00000011570	ILF2	14724.8	-0.879499	0.0651552	3.13e-42	1.52e-40
ENSGALG00000052396		65.9099	-0.879342	0.361324	0.00263673	0.00577149
ENSGALG00000050038		80.9585	-0.879101	0.288529	0.000428779	0.00106186
ENSGALG00000036346	AMH	144.238	-0.879078	0.223913	1.65e-05	4.88e-05
ENSGALG00000033694		303.574	-0.878014	0.195202	1.32e-06	4.48e-06
ENSGALG00000031411	KCNN1	90.8203	-0.877559	0.282816	0.000358091	0.000896174
ENSGALG00000054554		5.61975	-0.877498	0.578379	0.0169209	0.0319091
ENSGALG00000009104	ANKRD26	1720	-0.877172	0.246797	7.21e-05	0.000197993
ENSGALG00000027736	gga-mir-3533	6.36895	-0.87705	0.588376	0.017449	0.0328395
ENSGALG00000001036	ELAC2	3073.12	-0.876785	0.113874	2.69e-15	2.1e-14
ENSGALG00000008249	DNAJC2	8127.19	-0.876721	0.0688002	6.74e-38	2.59e-36
ENSGALG00000037549	EML3	4143.11	-0.876634	0.110231	3.6e-16	3.02e-15
ENSGALG00000010691		159.425	-0.87625	0.203565	3.24e-06	1.04e-05
ENSGALG00000043290		273.199	-0.876145	0.178751	1.86e-07	6.92e-07
ENSGALG00000001506	PTTG2	2663.71	-0.875853	0.0733397	1.41e-33	4.31e-32
ENSGALG00000017838	SNORA62	136.401	-0.874882	0.175334	1.19e-07	4.52e-07
ENSGALG00000030245		457.965	-0.874806	0.210419	6.25e-06	1.95e-05
ENSGALG00000017872		23.9859	-0.874501	0.366679	0.00304465	0.00658379
ENSGALG00000051086		6.32696	-0.874459	0.823549	0.0152843	0.0290783
ENSGALG00000005845	SLC7A5	60.1535	-0.874271	0.285644	0.000416311	0.00103352
ENSGALG00000011421	HAL	25.8066	-0.874181	0.48832	0.0114107	0.0222613
ENSGALG00000048013	HTD2	1445.18	-0.873791	0.0967816	3.47e-20	4.04e-19
ENSGALG00000026276	TCF15	6.71974	-0.873406	0.826888	0.0151517	0.0288464
ENSGALG00000026363	FIGNL1	1429.88	-0.87189	0.0784886	2.29e-29	5.29e-28
ENSGALG00000052844		1416.46	-0.871422	0.0989267	2.54e-19	2.78e-18
ENSGALG00000052930		10413	-0.871306	0.0862463	1.08e-24	1.82e-23
ENSGALG00000053404		136.642	-0.870968	0.227828	2.58e-05	7.46e-05
ENSGALG00000048183		28.4473	-0.870928	0.493194	0.0120564	0.0234103
ENSGALG00000004346	P2RY4	15.3455	-0.870913	0.675466	0.0202929	0.03772
ENSGALG00000052196		977.766	-0.87037	0.118423	4e-14	2.83e-13
ENSGALG00000052351		7.63849	-0.87021	0.936669	0.00856442	0.0170701
ENSGALG00000030793	KCNE2	7.83896	-0.870158	0.741447	0.0193815	0.0361763
ENSGALG00000001918	DNAJB5	1660.79	-0.870135	0.0893567	4.2e-23	6.25e-22
ENSGALG00000051491		79.3178	-0.870006	0.269158	0.00023663	0.000605569
ENSGALG00000036896		429.216	-0.869906	0.209346	6.41e-06	2e-05
ENSGALG00000054624		601.813	-0.869337	0.158504	8.3e-09	3.57e-08
ENSGALG00000039964		18456.6	-0.869261	0.0614122	3.55e-46	2.19e-44
ENSGALG00000001925	GNB1L	518.184	-0.869185	0.131779	8.52e-12	4.94e-11
ENSGALG00000051818		13.4826	-0.869043	0.67272	0.0204835	0.0380478
ENSGALG00000036252	SAP30	1469.1	-0.868687	0.0832091	3.31e-26	6.2e-25
ENSGALG00000046674	CTU2	1957.31	-0.868663	0.0764443	1.29e-30	3.28e-29
ENSGALG00000007147		349.016	-0.868591	0.157976	7.71e-09	3.33e-08
ENSGALG00000014788	CENPH	3289.18	-0.868528	0.113604	4.22e-15	3.24e-14
ENSGALG00000052562		15.6637	-0.868508	0.6643	0.0204931	0.0380614
ENSGALG00000008969	EPCAM	11.4893	-0.867707	0.769153	0.0185435	0.0347288
ENSGALG00000040541	SLC5A6	2484.2	-0.86732	0.128976	3.57e-12	2.14e-11
ENSGALG00000011109	MAPK10	121.146	-0.866995	0.237632	5.21e-05	0.000145215
ENSGALG00000001889	CARD9	215.595	-0.866728	0.240855	6.31e-05	0.000174319
ENSGALG00000030739	MSL1	11021.9	-0.866296	0.0950975	1.69e-20	2e-19
ENSGALG00000042619		3.62565	-0.865319	1.00362	0.00526069	0.0108859
ENSGALG00000006969	USP28	978.86	-0.864394	0.112992	4.13e-15	3.17e-14
ENSGALG00000011801	ESR2	48.355	-0.863536	0.396985	0.00530605	0.0109741
ENSGALG00000054527		26.6254	-0.863517	0.387232	0.00465762	0.00973938
ENSGALG00000041182	TBX1	5.37281	-0.863374	1.05398	0.00348882	0.00746803
ENSGALG00000052055		4417	-0.862859	0.0631223	3.2e-43	1.65e-41
ENSGALG00000004837	CCNDBP1	3884.24	-0.862807	0.13363	2.2e-11	1.24e-10
ENSGALG00000032400	UTP23	1330.57	-0.862648	0.0915089	8.74e-22	1.17e-20
ENSGALG00000051645	CDC6	1660.4	-0.862161	0.115774	1.98e-14	1.44e-13
ENSGALG00000048646		7.41805	-0.861873	1.022	0.00454242	0.00952198
ENSGALG00000034661	ID1	419.66	-0.861633	0.168407	6.39e-08	2.51e-07
ENSGALG00000031524		2252.67	-0.861317	0.0968911	1.28e-19	1.43e-18
ENSGALG00000005038	CENPI	4645.01	-0.860196	0.0612874	1.98e-45	1.18e-43
ENSGALG00000054791		5.10662	-0.859916	0.758076	0.0196712	0.036666
ENSGALG00000010255	NASP	7132.67	-0.85964	0.0573776	2.02e-51	1.61e-49
ENSGALG00000013239		247.281	-0.859609	0.189104	1.12e-06	3.84e-06
ENSGALG00000050465		40.6649	-0.859294	0.345678	0.0024537	0.00539874
ENSGALG00000011208	HELQ	1611.09	-0.859205	0.10499	5.76e-17	5.17e-16
ENSGALG00000004832	RBM41	1036.66	-0.858776	0.0993059	1.1e-18	1.14e-17
ENSGALG00000005688	DNASE1L3	46.5351	-0.858714	0.338026	0.00211812	0.00470411
ENSGALG00000050526		88.8372	-0.85871	0.310553	0.00110955	0.0025836
ENSGALG00000011914	CENPM	2335.98	-0.858407	0.0697713	1.83e-35	6.35e-34
ENSGALG00000009957	TIE1	232.699	-0.858314	0.215422	1.38e-05	4.15e-05
ENSGALG00000019384	MAPK12	41.3917	-0.85802	0.38088	0.00449061	0.00942238
ENSGALG00000005653	NFKB2	3866.58	-0.857502	0.0629648	6.54e-43	3.28e-41
ENSGALG00000029514	MAPK8IP3	4120.34	-0.857389	0.206326	6.68e-06	2.08e-05
ENSGALG00000026247		5.08109	-0.857243	0.773851	0.0191687	0.0358122
ENSGALG00000009382	CAPN8	100.65	-0.857214	0.328262	0.0017453	0.00393363
ENSGALG00000051184		89.0276	-0.85716	0.244229	9.11e-05	0.000246324
ENSGALG00000045469	BCAN	1043.02	-0.856321	0.131057	1.35e-11	7.69e-11
ENSGALG00000011884	EXOSC9	6079.44	-0.855646	0.0859836	5.28e-24	8.42e-23
ENSGALG00000019795		675.175	-0.855488	0.104596	6.06e-17	5.43e-16
ENSGALG00000051668		118.27	-0.855234	0.269533	0.000304526	0.000768692
ENSGALG00000003533	ZNF511	1416.25	-0.854924	0.100284	3.25e-18	3.25e-17
ENSGALG00000050260		166.954	-0.854642	0.215456	1.51e-05	4.5e-05
ENSGALG00000047540		6.12935	-0.854615	0.623555	0.0213346	0.0394557
ENSGALG00000037467	NEU2	9.21299	-0.853713	0.927505	0.00942688	0.0186579
ENSGALG00000053766		9179.57	-0.853493	0.110372	2.24e-15	1.76e-14
ENSGALG00000017091	FLT1	13.2699	-0.85344	0.669316	0.0222081	0.0409489
ENSGALG00000031853	PIGBOS1	4619.38	-0.85332	0.12587	2.57e-12	1.56e-11
ENSGALG00000010973	TRA2A	14374.5	-0.853057	0.0847879	1.76e-24	2.88e-23
ENSGALG00000039978	SLC4A1	34.5558	-0.852023	0.499574	0.0143461	0.0274327
ENSGALG00000030097	RCC1	4785.89	-0.8515	0.0851313	3.21e-24	5.18e-23
ENSGALG00000009033	FAM183A	161.963	-0.851409	0.20294	5.72e-06	1.8e-05
ENSGALG00000053355		9.68229	-0.850878	0.567998	0.0193378	0.0361072
ENSGALG00000047991		37.1422	-0.850464	0.360286	0.00351654	0.00752136
ENSGALG00000053513		81.992	-0.85029	0.276309	0.000426672	0.00105745
ENSGALG00000010697	SEMA4D	40.5954	-0.849451	0.304053	0.00104966	0.00245412
ENSGALG00000031894	PLA2G2A	4.9325	-0.849116	0.843287	0.0154182	0.0293018
ENSGALG00000049332		3.61076	-0.848833	0.773964	0.0198575	0.0369875
ENSGALG00000051008		150.025	-0.848655	0.233984	6.01e-05	0.000166492
ENSGALG00000054212		352.758	-0.84855	0.132351	3.11e-11	1.72e-10
ENSGALG00000050533		17.7077	-0.848334	0.497855	0.0145845	0.0278555
ENSGALG00000012269	VCPKMT	2856.23	-0.847705	0.0913162	3.58e-21	4.52e-20
ENSGALG00000050107		4.32656	-0.847346	0.982633	0.00632632	0.0129216
ENSGALG00000003298	DDX55	2051.76	-0.847003	0.124387	2.13e-12	1.3e-11
ENSGALG00000049437		199.692	-0.846973	0.168522	1.08e-07	4.13e-07
ENSGALG00000042903		129.927	-0.84693	0.312839	0.00136968	0.00314428
ENSGALG00000005487	CCDC12	3894.84	-0.846709	0.07736	1.54e-28	3.37e-27
ENSGALG00000036582		133.336	-0.846643	0.243563	0.000106868	0.000286469
ENSGALG00000048625		985.194	-0.846623	0.136623	1.25e-10	6.46e-10
ENSGALG00000049557		2014.68	-0.845872	0.115651	5.67e-14	3.97e-13
ENSGALG00000031922	TRMU	3410.18	-0.845529	0.101607	1.9e-17	1.78e-16
ENSGALG00000000576	RRNAD1	1583.83	-0.845132	0.090062	1.4e-21	1.83e-20
ENSGALG00000053058	LAMTOR2	6271.72	-0.844456	0.142615	6.98e-10	3.36e-09
ENSGALG00000048707		94.7948	-0.844284	0.23612	7.42e-05	0.000203018
ENSGALG00000002125	TMOD1	247.708	-0.843138	0.186163	1.29e-06	4.36e-06
ENSGALG00000035749		1046.18	-0.843137	0.0908765	3.83e-21	4.82e-20
ENSGALG00000008735	BFSP1	94.9059	-0.843128	0.347486	0.00303641	0.00656773
ENSGALG00000017148		1290.71	-0.842583	0.123318	1.84e-12	1.13e-11
ENSGALG00000006301	KDM8	610.558	-0.842403	0.107659	1.13e-15	9.02e-15
ENSGALG00000040521	HOXA2	433.285	-0.840824	0.23454	7.24e-05	0.000198563
ENSGALG00000042478	ND4L	37808.6	-0.840506	0.276327	0.000495436	0.00121478
ENSGALG00000037167	HIST1H103	35.4318	-0.84024	0.339891	0.00271409	0.00592791
ENSGALG00000013342	GBX2	363.796	-0.839051	0.157933	2.39e-08	9.81e-08
ENSGALG00000050766		1.67412	-0.838761	0.952458	0.00809876	0.0162126
ENSGALG00000046248	ELMOD3	5553.79	-0.83868	0.101752	3.79e-17	3.44e-16
ENSGALG00000013745	RTTN	2697.89	-0.838089	0.126432	7.58e-12	4.41e-11
ENSGALG00000035050		1464.01	-0.83776	0.113819	4.12e-14	2.91e-13
ENSGALG00000047627		749.303	-0.837235	0.190571	2.47e-06	8.04e-06
ENSGALG00000016127		6.69464	-0.837159	0.8526	0.0153407	0.0291718
ENSGALG00000035360	XPO6	8890.12	-0.837013	0.125898	6.66e-12	3.9e-11
ENSGALG00000047531	gga-mir-12259	15.6029	-0.836972	0.444534	0.0109754	0.0214667
ENSGALG00000047592		17.8219	-0.8364	0.560349	0.0206703	0.038339
ENSGALG00000007084	DUSP12	1503.54	-0.836224	0.0726296	2.56e-31	6.78e-30
ENSGALG00000047020		36.8074	-0.836205	0.470829	0.0134683	0.0258927
ENSGALG00000011579		23.0693	-0.835965	0.532133	0.0187392	0.0350669
ENSGALG00000008149	EWSR1	16977.3	-0.835812	0.0683091	4.56e-35	1.52e-33
ENSGALG00000002637	RBP7	26.5434	-0.835642	0.418744	0.00874516	0.0173942
ENSGALG00000049459	gga-mir-12250	2.06707	-0.835485	0.860921	0.0147761	0.0281947
ENSGALG00000009345		2224.3	-0.835202	0.0788987	7.9e-27	1.54e-25
ENSGALG00000031651		8.39679	-0.835168	0.96502	0.00738158	0.0148917
ENSGALG00000051258		12779.7	-0.83486	0.100752	2.66e-17	2.45e-16
ENSGALG00000047464	FBXL22	51.7153	-0.834716	0.407266	0.00780372	0.0156533
ENSGALG00000016591	DRC1	13.5606	-0.83453	0.662999	0.0244903	0.0447672
ENSGALG00000007833		632.425	-0.833863	0.122987	2.73e-12	1.66e-11
ENSGALG00000008658	ZNHIT6	1262.37	-0.833767	0.100221	2.02e-17	1.88e-16
ENSGALG00000035412		27.4511	-0.833592	0.426896	0.00964125	0.0190284
ENSGALG00000029226		3181.2	-0.833547	0.100164	1.98e-17	1.85e-16
ENSGALG00000028573		2530.41	-0.833438	0.10513	5.1e-16	4.22e-15
ENSGALG00000028608	BTC	256.85	-0.833169	0.152911	1.15e-08	4.86e-08
ENSGALG00000040754	CYP1C1	28.4934	-0.832085	0.4985	0.0164185	0.0310708
ENSGALG00000004195	KIF4B	20994.9	-0.83162	0.0628983	1.52e-40	6.79e-39
ENSGALG00000027778		3.65068	-0.831588	0.989508	0.00606042	0.0124178
ENSGALG00000048698		3046.11	-0.831394	0.0797902	4.65e-26	8.58e-25
ENSGALG00000009830	MGAT4D	15.368	-0.831223	0.621966	0.0242746	0.0444184
ENSGALG00000011609		8.93547	-0.831068	0.786369	0.0206015	0.0382273
ENSGALG00000051588		66.087	-0.830297	0.350555	0.0036867	0.0078488
ENSGALG00000049153	PDF	1104.74	-0.828953	0.148799	5.82e-09	2.55e-08
ENSGALG00000041923	ESPL1	13284.5	-0.828837	0.0388242	9.41e-102	3.99e-99
ENSGALG00000048403		14.021	-0.828834	0.469724	0.0141275	0.0270437
ENSGALG00000003245	LSM1	4247.31	-0.828566	0.0833009	6.07e-24	9.61e-23
ENSGALG00000013741	SYTL3	80.2317	-0.828442	0.250214	0.00020621	0.00053246
ENSGALG00000049176		810.899	-0.828391	0.158128	3.71e-08	1.49e-07
ENSGALG00000028457		16.9002	-0.827945	0.558794	0.0216837	0.0400645
ENSGALG00000041435		127.896	-0.827371	0.263544	0.000374097	0.000933909
ENSGALG00000003517	ZBTB8OS	6954.58	-0.827174	0.0955491	1.13e-18	1.17e-17
ENSGALG00000010748	EXO1	2575.93	-0.826522	0.0855201	9.98e-23	1.45e-21
ENSGALG00000050756		6.14365	-0.826505	0.578959	0.023106	0.0424829
ENSGALG00000033920		528.863	-0.826099	0.18953	3e-06	9.69e-06
ENSGALG00000047781	RAD9B	44.7157	-0.826053	0.399082	0.00768612	0.0154461
ENSGALG00000035392		1951.08	-0.82587	0.18643	2.16e-06	7.11e-06
ENSGALG00000026151	CEP250	1512.54	-0.8258	0.134139	1.73e-10	8.83e-10
ENSGALG00000047517		1403.49	-0.825644	0.0949914	8.37e-19	8.76e-18
ENSGALG00000034351	SNORA2C	9.44533	-0.825594	0.587239	0.0236706	0.0434267
ENSGALG00000043671		232.35	-0.825432	0.260991	0.000348007	0.000872023
ENSGALG00000045994		20.6548	-0.825358	0.545137	0.0210802	0.0390256
ENSGALG00000015032		11.3197	-0.825293	0.655996	0.0256735	0.0467237
ENSGALG00000011445	AAMP	8226.19	-0.824762	0.0598392	7.63e-44	4.12e-42
ENSGALG00000038639	AGBL5	632.374	-0.82453	0.117014	4.31e-13	2.8e-12
ENSGALG00000019761		15.3772	-0.823936	0.726859	0.0245628	0.0448844
ENSGALG00000016509	IFT172	1855.8	-0.823642	0.164686	1.33e-07	5.03e-07
ENSGALG00000054551		139.411	-0.823483	0.492351	0.0168698	0.0318387
ENSGALG00000007353	MTFMT	2124.08	-0.823275	0.122955	5.05e-12	2.99e-11
ENSGALG00000038243		299.452	-0.823121	0.240949	0.000143878	0.000379053
ENSGALG00000048011	SCLT1	2966.69	-0.82284	0.146578	4.65e-09	2.06e-08
ENSGALG00000043591	PLA2G4F	127.691	-0.822746	0.243659	0.000166217	0.000434632
ENSGALG00000044610	CFAP100	27.2956	-0.822529	0.605859	0.024937	0.0455062
ENSGALG00000007537	INCENP	13899.7	-0.822399	0.0605441	1.2e-42	5.87e-41
ENSGALG00000039171	RAD52	1490.65	-0.82168	0.0840069	3.23e-23	4.86e-22
ENSGALG00000029811	BMPER	2780.59	-0.821394	0.0743142	5.06e-29	1.15e-27
ENSGALG00000051403		5.67277	-0.820663	0.941202	0.00907725	0.0179969
ENSGALG00000048790		20.9171	-0.82058	0.662146	0.0263322	0.0478354
ENSGALG00000028209		14.3973	-0.820519	0.508648	0.0187304	0.0350586
ENSGALG00000005316	SRFBP1	1224.81	-0.820301	0.0798316	2.18e-25	3.86e-24
ENSGALG00000009709	MUM1L1	3402.84	-0.818949	0.101799	2.07e-16	1.78e-15
ENSGALG00000000458	TMPRSS9	50.1417	-0.81887	0.312796	0.00194609	0.00434966
ENSGALG00000035578	RBM6	4088.2	-0.818685	0.111783	5.77e-14	4.03e-13
ENSGALG00000012171	GPR39	33.8956	-0.818275	0.683455	0.0264881	0.0480697
ENSGALG00000052727		16.5591	-0.817938	0.595109	0.0251432	0.0458566
ENSGALG00000054063	SNORD21	19.4058	-0.817887	0.359784	0.00489091	0.0101868
ENSGALG00000040926	SAMSN1	19.6804	-0.817407	0.456189	0.0140142	0.0268396
ENSGALG00000052302		119.262	-0.817041	0.345946	0.00392194	0.00830568
ENSGALG00000050838		91.6597	-0.816407	0.304129	0.00162002	0.00366978
ENSGALG00000001412	SEMA7A	236.466	-0.815325	0.222137	5.67e-05	0.000157688
ENSGALG00000053858		2.86502	-0.81525	0.995663	0.00579995	0.0119221
ENSGALG00000009276	LRAT	98.4277	-0.814624	0.32623	0.0027626	0.00602406
ENSGALG00000029761	SIRT2	8599.55	-0.814456	0.067545	4.31e-34	1.35e-32
ENSGALG00000025844	AMT	2928.13	-0.814177	0.121427	4.89e-12	2.9e-11
ENSGALG00000037040		1967.39	-0.814113	0.0957319	4.47e-18	4.42e-17
ENSGALG00000046794		45.3952	-0.813842	0.321073	0.00249811	0.00549045
ENSGALG00000012074	ALPK1	1013.33	-0.813785	0.101599	2.8e-16	2.38e-15
ENSGALG00000049405		79.0878	-0.813774	0.284235	0.000955521	0.00224639
ENSGALG00000016834	MCF2L	5.95307	-0.813586	0.846172	0.0171008	0.0322257
ENSGALG00000020510		2522.16	-0.813231	0.0579689	2.56e-45	1.5e-43
ENSGALG00000053885		171.533	-0.81322	0.144103	4.04e-09	1.8e-08
ENSGALG00000054235		41.7748	-0.812965	0.389126	0.00769735	0.015461
ENSGALG00000025998	gga-mir-92-2	2.63362	-0.812794	0.825	0.0190053	0.0355235
ENSGALG00000030206		24.9343	-0.812657	0.347363	0.00421361	0.00888015
ENSGALG00000047981		3747.74	-0.812145	0.0978906	2.63e-17	2.44e-16
ENSGALG00000053140		44.6165	-0.812145	0.379047	0.0068279	0.0138564
ENSGALG00000017368	TRNT1	1639.93	-0.81212	0.0907084	8.5e-20	9.65e-19
ENSGALG00000003839	GRM2	2.71323	-0.812017	0.952293	0.00841539	0.0167963
ENSGALG00000053305		1.88214	-0.811952	0.920756	0.010751	0.0210533
ENSGALG00000049570		90.7551	-0.811571	0.296212	0.00139838	0.00320423
ENSGALG00000049686		160.667	-0.810935	0.22859	9.21e-05	0.000248687
ENSGALG00000041154	MNX1	837.97	-0.810382	0.110876	6.64e-14	4.62e-13
ENSGALG00000011683	CENPC	3717.98	-0.810227	0.0885269	1.38e-20	1.64e-19
ENSGALG00000017304	PGM2L1	577.446	-0.810033	0.213573	3.56e-05	0.000101083
ENSGALG00000053163		14.8568	-0.809767	0.533881	0.0223763	0.0412355
ENSGALG00000047503		16.4676	-0.809739	0.568499	0.0249105	0.0454631
ENSGALG00000028409	SNRPGP15	12312.4	-0.809623	0.103064	9.85e-16	7.93e-15
ENSGALG00000031863		31.9205	-0.809355	0.295208	0.00140107	0.00320949
ENSGALG00000041094	SYT1	11.3581	-0.809313	0.620519	0.0273731	0.0495084
ENSGALG00000037322	HIST1H46	469.522	-0.808696	0.137523	1.01e-09	4.78e-09
ENSGALG00000054742		55.6948	-0.808586	0.353207	0.00484924	0.0101099
ENSGALG00000042389	EN1	1830.05	-0.80843	0.0876802	7.38e-21	9.03e-20
ENSGALG00000025149	gga-mir-1663	3.50355	-0.807964	0.807196	0.0208867	0.038703
ENSGALG00000027198	TMEM47	10.5186	-0.807625	0.836446	0.0183187	0.0343487
ENSGALG00000050178		3425.78	-0.806357	0.0851084	6.73e-22	9.11e-21
ENSGALG00000015382	CHRNA6	33.2058	-0.806206	0.420115	0.0113779	0.0222055
ENSGALG00000044071	ABI3	136.758	-0.80575	0.292008	0.00134492	0.00309096
ENSGALG00000004486	ZCCHC8	5022.85	-0.805471	0.136688	9.46e-10	4.5e-09
ENSGALG00000038546		24.0458	-0.805445	0.519782	0.0217828	0.0402291
ENSGALG00000035117		83.3515	-0.805106	0.296203	0.00152344	0.00346513
ENSGALG00000004254	TMEM120B	2008.96	-0.804931	0.0854382	1.12e-21	1.49e-20
ENSGALG00000034022		123.686	-0.804745	0.304689	0.00190767	0.00427148
ENSGALG00000029449	RFC2	2532.63	-0.804631	0.0804317	3.7e-24	5.97e-23
ENSGALG00000043674	gga-mir-6516	3.05605	-0.804527	0.807274	0.0211484	0.0391338
ENSGALG00000007287		24858.3	-0.80387	0.106705	1.24e-14	9.23e-14
ENSGALG00000027148		4.23281	-0.803649	0.725904	0.02701	0.0489342
ENSGALG00000039865	HAX1	4021.85	-0.803212	0.0884832	2.81e-20	3.29e-19
ENSGALG00000051518		414.933	-0.80264	0.123966	2.4e-11	1.34e-10
ENSGALG00000007333	UBAP1L	33.9615	-0.802607	0.344033	0.00443105	0.00931035
ENSGALG00000045948		74.5591	-0.802357	0.240484	0.000205256	0.000530253
ENSGALG00000008613	NDUFA1	3050.57	-0.80204	0.11262	2.7e-13	1.79e-12
ENSGALG00000041044		161.405	-0.801787	0.220386	6.72e-05	0.000185171
ENSGALG00000051885	TTC4	3342.82	-0.801554	0.0856018	1.96e-21	2.54e-20
ENSGALG00000007676	EME1	2246.59	-0.799124	0.0740091	9.09e-28	1.88e-26
ENSGALG00000033245	SMPD2	1156.51	-0.799116	0.115049	9.61e-13	6.07e-12
ENSGALG00000030099		2663.19	-0.79894	0.0854099	2.17e-21	2.79e-20
ENSGALG00000000011	C10orf88	1356.52	-0.798825	0.090415	2.57e-19	2.81e-18
ENSGALG00000038065	SLC8A2	35.8417	-0.798541	0.386544	0.00852336	0.0169971
ENSGALG00000050250		163.769	-0.798476	0.177492	1.72e-06	5.74e-06
ENSGALG00000054479		12.9464	-0.797968	0.550354	0.0254683	0.046397
ENSGALG00000025868	TAF1C	940.597	-0.797872	0.114437	8.01e-13	5.09e-12
ENSGALG00000044628		5561.87	-0.797263	0.0698244	8.8e-31	2.27e-29
ENSGALG00000004631	DRAXIN	28.3816	-0.797101	0.498491	0.0209383	0.0387896
ENSGALG00000001586	NEIL1	1058.44	-0.7965	0.12018	8.79e-12	5.08e-11
ENSGALG00000000908	ADAT1	1085.78	-0.795967	0.142782	6.36e-09	2.77e-08
ENSGALG00000040498	SLC26A8	68.5902	-0.795781	0.330753	0.00375226	0.00797257
ENSGALG00000047838		7.15642	-0.795362	0.837938	0.0189291	0.0353975
ENSGALG00000035295	AP4B1	2484.36	-0.795309	0.109201	8.46e-14	5.83e-13
ENSGALG00000009036	GANC	3859	-0.794698	0.151103	3.71e-08	1.49e-07
ENSGALG00000054629	PDCD2L	1032.22	-0.79414	0.080909	2.53e-23	3.84e-22
ENSGALG00000042222		850.778	-0.793605	0.133514	7.21e-10	3.47e-09
ENSGALG00000052421		129.078	-0.793425	0.236869	0.000201614	0.000521263
ENSGALG00000053130	MYOZ3	26.4502	-0.792933	0.455376	0.0167913	0.0317092
ENSGALG00000050912		15.1389	-0.79277	0.556195	0.0267403	0.0484947
ENSGALG00000054015	PRR11	1071.77	-0.792281	0.0809097	3.2e-23	4.82e-22
ENSGALG00000014971	SLC2A9	3.7004	-0.791962	1.02326	0.00452107	0.00947969
ENSGALG00000047265		89.0738	-0.791899	0.23829	0.000222582	0.000571802
ENSGALG00000028626	DCLRE1B	475.663	-0.791644	0.111642	3.49e-13	2.3e-12
ENSGALG00000012229	RPS29	52732.2	-0.791606	0.126969	1.18e-10	6.13e-10
ENSGALG00000046656	PMVK	1739.65	-0.791483	0.110878	2.48e-13	1.65e-12
ENSGALG00000002850	RASA2	2895.91	-0.790478	0.11682	3.46e-12	2.09e-11
ENSGALG00000006342	UEVLD	1814.61	-0.79031	0.156399	1.13e-07	4.32e-07
ENSGALG00000003800	PABPC4	2281.77	-0.790291	0.120645	1.51e-11	8.56e-11
ENSGALG00000030866	CPQ	10.5896	-0.789887	0.535898	0.0255929	0.0466028
ENSGALG00000000476	LRRTM4	39.3355	-0.789451	0.345271	0.00520582	0.0107779
ENSGALG00000043359	RRP9	6264.94	-0.789249	0.0780191	1.25e-24	2.08e-23
ENSGALG00000023934		42.8593	-0.788752	0.515903	0.0239378	0.043867
ENSGALG00000053886		50.1733	-0.78804	0.31804	0.00317863	0.00685325
ENSGALG00000039576	KNSTRN	3774.47	-0.787416	0.0622748	3.23e-37	1.21e-35
ENSGALG00000002908	TRAIP	3154.86	-0.787187	0.0776178	9.65e-25	1.63e-23
ENSGALG00000035554		1002.48	-0.787172	0.110685	3.05e-13	2.01e-12
ENSGALG00000002179	FBF1	4745.33	-0.787072	0.13841	3.43e-09	1.54e-08
ENSGALG00000054506		40.8181	-0.78647	0.399686	0.0110071	0.021526
ENSGALG00000049911		2994.27	-0.786393	0.0969922	1.38e-16	1.2e-15
ENSGALG00000001283	SRRM1	25690.3	-0.786071	0.138027	3.27e-09	1.47e-08
ENSGALG00000053882		190.451	-0.785969	0.191038	1.01e-05	3.08e-05
ENSGALG00000000907	KARS	26442.9	-0.785714	0.0812745	1.12e-22	1.62e-21
ENSGALG00000012687	TPMT	871.052	-0.785652	0.122771	4.16e-11	2.27e-10
ENSGALG00000023703	GIT1	9832.53	-0.785621	0.0698214	6.11e-30	1.47e-28
ENSGALG00000013528		14.8943	-0.785099	0.516648	0.0245941	0.0449314
ENSGALG00000025593		10.621	-0.785038	0.515053	0.0244468	0.0447029
ENSGALG00000028983	HOXA9	2616.93	-0.784842	0.11597	3.51e-12	2.11e-11
ENSGALG00000016476	TTC32	23.2625	-0.78482	0.505528	0.0235159	0.0431674
ENSGALG00000044519	COA8	1236.9	-0.784141	0.0834632	1.55e-21	2.02e-20
ENSGALG00000005171	AP1S3	51.945	-0.783541	0.319508	0.00345498	0.00740149
ENSGALG00000045403	R3HCC1L	1477.63	-0.782685	0.0920988	5.22e-18	5.14e-17
ENSGALG00000015492	PDZK1	25.6243	-0.782637	0.366385	0.0076596	0.0154005
ENSGALG00000001779	KIAA0895L	702.314	-0.78226	0.125433	1.21e-10	6.24e-10
ENSGALG00000009677	SSB	9605.1	-0.78138	0.07186	4.21e-28	8.96e-27
ENSGALG00000015804	LTN1	5780.52	-0.781277	0.138127	4.17e-09	1.85e-08
ENSGALG00000034134	ZNF302	2168.41	-0.780857	0.0931048	1.36e-17	1.29e-16
ENSGALG00000033185	TAZ	12245.4	-0.78075	0.0659452	6.7e-33	1.93e-31
ENSGALG00000013365		7151.71	-0.780362	0.110006	3.55e-13	2.33e-12
ENSGALG00000012291	POLR2F	6526.31	-0.780245	0.0732959	5.04e-27	9.94e-26
ENSGALG00000049767		51.6604	-0.780082	0.246432	0.000399927	0.000994535
ENSGALG00000053178		23.1646	-0.78005	0.336234	0.00493631	0.0102761
ENSGALG00000002945	TMEM266	301.106	-0.780039	0.188642	9.43e-06	2.88e-05
ENSGALG00000029721	C1orf232	1044.91	-0.779465	0.108409	1.77e-13	1.19e-12
ENSGALG00000041331	RRP12	5545.46	-0.779318	0.065039	1.21e-33	3.72e-32
ENSGALG00000009577	PUS7L	430.94	-0.779121	0.121505	3.91e-11	2.14e-10
ENSGALG00000052406		404.732	-0.77812	0.189313	1.06e-05	3.21e-05
ENSGALG00000043021	HORMAD1	63.1534	-0.778066	0.331976	0.00467637	0.00977731
ENSGALG00000043606		330.884	-0.777901	0.189197	1.05e-05	3.19e-05
ENSGALG00000033089		162.268	-0.777349	0.263675	0.000824313	0.00195964
ENSGALG00000020939	SLC35C2	6057.25	-0.777224	0.0967008	2.53e-16	2.15e-15
ENSGALG00000000618	ZCCHC17	1666.13	-0.776861	0.0935773	2.83e-17	2.61e-16
ENSGALG00000046714		240.769	-0.776534	0.16478	6.63e-07	2.31e-06
ENSGALG00000053000	C20orf194	5177.81	-0.775684	0.166062	8.15e-07	2.81e-06
ENSGALG00000003071	OGFOD1	2699.41	-0.775557	0.0570034	1.04e-42	5.14e-41
ENSGALG00000050781		5.88652	-0.775461	0.513232	0.0258477	0.047003
ENSGALG00000011865	SMTN	10291.1	-0.774847	0.0745548	7.45e-26	1.36e-24
ENSGALG00000046960		3199.49	-0.774525	0.156388	2e-07	7.45e-07
ENSGALG00000010129	PLK3	549.164	-0.774431	0.109018	3.37e-13	2.22e-12
ENSGALG00000015544	ALDOB	5.21149	-0.774265	0.773942	0.0269986	0.048919
ENSGALG00000025789	gga-mir-6614	17.8274	-0.773942	0.465996	0.0206909	0.0383711
ENSGALG00000034124	NLRP3	1632.31	-0.773923	0.125015	1.66e-10	8.47e-10
ENSGALG00000051171		1680.22	-0.773052	0.0992671	1.91e-15	1.51e-14
ENSGALG00000032803		240.189	-0.772409	0.174528	2.63e-06	8.56e-06
ENSGALG00000007387	GTF3C1	4481.32	-0.772123	0.117739	1.52e-11	8.65e-11
ENSGALG00000010889	HOOK1	624.222	-0.77212	0.158076	2.86e-07	1.04e-06
ENSGALG00000048239		567.16	-0.772056	0.158214	2.93e-07	1.07e-06
ENSGALG00000006968	HNF1A	23.9732	-0.771477	0.44823	0.01881	0.0351871
ENSGALG00000017875		9.08177	-0.771291	0.503088	0.0254763	0.0464062
ENSGALG00000012695	NOL7	2518.88	-0.771285	0.0807665	3.68e-22	5.08e-21
ENSGALG00000006588		3.18571	-0.770608	0.979599	0.0068073	0.0138215
ENSGALG00000054176		631.619	-0.768985	0.138273	7.51e-09	3.25e-08
ENSGALG00000027823	TFAP4	2184.58	-0.767992	0.0687793	1.71e-29	3.97e-28
ENSGALG00000036171		232.113	-0.767585	0.183669	8.11e-06	2.49e-05
ENSGALG00000052478		25.8628	-0.767473	0.472389	0.0224909	0.041437
ENSGALG00000020454	C5H14ORF169	3069.55	-0.766914	0.083426	1.1e-20	1.32e-19
ENSGALG00000009690	CENPF	12094.4	-0.766693	0.131165	1.43e-09	6.7e-09
ENSGALG00000046964	CPLANE2	4076.62	-0.766659	0.118515	2.81e-11	1.56e-10
ENSGALG00000001555	AURKAIP1	3500.92	-0.766433	0.0822699	3.46e-21	4.37e-20
ENSGALG00000037350	gga-mir-7b	8.60249	-0.765805	0.511395	0.0273398	0.0494648
ENSGALG00000052040		4.44935	-0.765399	0.864309	0.0177319	0.0333252
ENSGALG00000026070		7.01764	-0.765293	0.787346	0.0265942	0.0482459
ENSGALG00000032335	MARCKSL1	5657.3	-0.765268	0.094263	1.36e-16	1.18e-15
ENSGALG00000048335		129.082	-0.765081	0.222419	0.000159566	0.000418329
ENSGALG00000025557	RNase_MRP	58.3921	-0.765005	0.287843	0.00207187	0.00461284
ENSGALG00000041384	SHKBP1	1735.1	-0.764825	0.0910554	1.29e-17	1.22e-16
ENSGALG00000036970		108.748	-0.764464	0.295948	0.00256784	0.00563141
ENSGALG00000050167		16.0546	-0.763472	0.484697	0.0246758	0.0450656
ENSGALG00000050799		3851.51	-0.762885	0.0676428	4.89e-30	1.18e-28
ENSGALG00000055087		69.4248	-0.762881	0.2505	0.000631079	0.00152484
ENSGALG00000003906	MPHOSPH10	3003.06	-0.762558	0.0961901	6.47e-16	5.29e-15
ENSGALG00000042232	PSMG4	1028.51	-0.761998	0.123869	2.21e-10	1.11e-09
ENSGALG00000005706	HSCB	4140.72	-0.761897	0.0918485	3.15e-17	2.89e-16
ENSGALG00000003520	POLG2	1216.96	-0.761124	0.079371	2.59e-22	3.63e-21
ENSGALG00000008357	TPCN1	2213.04	-0.760926	0.175616	4.18e-06	1.33e-05
ENSGALG00000002044	EEF2KMT	2526.48	-0.760817	0.100855	1.33e-14	9.83e-14
ENSGALG00000047490		25.896	-0.760637	0.484724	0.0251675	0.0458957
ENSGALG00000049600		93.4898	-0.760509	0.27357	0.0014655	0.00334233
ENSGALG00000047103	UTP3	4481.02	-0.760124	0.0804973	1.06e-21	1.41e-20
ENSGALG00000008796	RPF1	2110.12	-0.76006	0.0762606	6.26e-24	9.88e-23
ENSGALG00000001172	KBP	30.8314	-0.759997	0.416869	0.0161972	0.0306809
ENSGALG00000042356	FSTL3	70.9479	-0.759921	0.36646	0.00954301	0.0188715
ENSGALG00000032215	ULK3	2057	-0.759508	0.0698391	4.45e-28	9.46e-27
ENSGALG00000043474		24.118	-0.759071	0.451188	0.0210581	0.0389981
ENSGALG00000001366	CASP9	818.099	-0.758714	0.120536	8.99e-11	4.71e-10
ENSGALG00000011619	SIVA1	6740.4	-0.758421	0.0768082	1.59e-23	2.44e-22
ENSGALG00000032469	ARHGAP45	128.323	-0.757819	0.283386	0.00202199	0.00450864
ENSGALG00000003250	ITPA	1463.3	-0.757585	0.1136	7.55e-12	4.4e-11
ENSGALG00000051854		273.53	-0.757578	0.157704	4.5e-07	1.6e-06
ENSGALG00000050058	REEP1	24.7194	-0.756988	0.442398	0.0201736	0.0375069
ENSGALG00000049662		2.80328	-0.756756	0.932076	0.0106673	0.0208946
ENSGALG00000044375	HDDC3	117.593	-0.756739	0.191903	2.29e-05	6.67e-05
ENSGALG00000050959		37.9793	-0.75656	0.380083	0.0116075	0.0226124
ENSGALG00000031812	TDRKH	1708.85	-0.756543	0.0930302	1.25e-16	1.09e-15
ENSGALG00000020320		769.484	-0.75616	0.130801	2.18e-09	9.96e-09
ENSGALG00000001231	SAMHD1	1812.8	-0.755894	0.0781986	1.25e-22	1.8e-21
ENSGALG00000003128	EDEM2	1502.73	-0.755806	0.0632711	2.04e-33	6.15e-32
ENSGALG00000001800		2379.19	-0.755411	0.085015	1.89e-19	2.09e-18
ENSGALG00000006455	SMPD4	3372.47	-0.754829	0.0683598	7.16e-29	1.61e-27
ENSGALG00000021213	UBE2D1	2087.72	-0.754331	0.107753	7.56e-13	4.81e-12
ENSGALG00000037186		7492.21	-0.754264	0.0746713	1.63e-24	2.69e-23
ENSGALG00000053648	TSSK3	28.3294	-0.753947	0.408571	0.0158348	0.0300388
ENSGALG00000017295	PTHLH	4272.78	-0.753522	0.0674825	1.79e-29	4.15e-28
ENSGALG00000052237		4.75264	-0.753407	0.937983	0.0101483	0.0199459
ENSGALG00000036283	RBM8A	7622.45	-0.753023	0.0896736	1.37e-17	1.29e-16
ENSGALG00000050325		3322.14	-0.752681	0.133956	5.69e-09	2.5e-08
ENSGALG00000014217	GUF1	1366.96	-0.75239	0.15093	1.82e-07	6.81e-07
ENSGALG00000026293	C3orf33	399.69	-0.752379	0.147856	1.06e-07	4.08e-07
ENSGALG00000015709	TACC3	29025.5	-0.752334	0.0868631	1.4e-18	1.44e-17
ENSGALG00000003682	ARL6IP4	6114.91	-0.752259	0.0820405	1.43e-20	1.7e-19
ENSGALG00000014847	MYOM1	175.665	-0.751696	0.255248	0.000904718	0.00213631
ENSGALG00000021869	PODN	44.2264	-0.751413	0.457927	0.0232332	0.0426875
ENSGALG00000050159		215.76	-0.751268	0.182808	1.16e-05	3.5e-05
ENSGALG00000041205		1259.38	-0.751223	0.154403	3.37e-07	1.22e-06
ENSGALG00000033894	MEA1	7558.78	-0.750615	0.0842194	1.5e-19	1.68e-18
ENSGALG00000027375	NR2C2AP	1652	-0.750284	0.0879475	4.38e-18	4.34e-17
ENSGALG00000017025	CKAP2	11472.5	-0.749786	0.0695017	1.19e-27	2.44e-26
ENSGALG00000052581	ARL16	273.924	-0.749766	0.157728	5.92e-07	2.08e-06
ENSGALG00000009157	ECT2	7521.74	-0.749437	0.0641959	5.25e-32	1.45e-30
ENSGALG00000053959		25.5418	-0.749346	0.475568	0.0259999	0.0472691
ENSGALG00000039376	DPT	417.34	-0.749257	0.147251	1.08e-07	4.12e-07
ENSGALG00000007093	CYTH1	5724.77	-0.749009	0.0970549	3.59e-15	2.78e-14
ENSGALG00000049427	RELT	728.217	-0.748766	0.109354	2.27e-12	1.39e-11
ENSGALG00000004794	H2AFY2	931.855	-0.748732	0.0949761	9.66e-16	7.79e-15
ENSGALG00000034960	MLXIPL	39.5071	-0.748526	0.374295	0.0116868	0.0227532
ENSGALG00000050717		4.75295	-0.748439	0.914479	0.0125729	0.0243107
ENSGALG00000002906	TARDBP	9089.09	-0.74834	0.0751113	6.74e-24	1.06e-22
ENSGALG00000039773	AKAP8	7288.53	-0.747919	0.0882731	7.29e-18	7.07e-17
ENSGALG00000049843		307.984	-0.747464	0.125934	8.85e-10	4.22e-09
ENSGALG00000015705		1091.82	-0.747449	0.154638	4.01e-07	1.44e-06
ENSGALG00000009719	PCDH10	3.15009	-0.747301	0.96017	0.00825565	0.0164959
ENSGALG00000031918	RAD51D	1629.74	-0.746395	0.100153	2.79e-14	2.01e-13
ENSGALG00000032765		39.5172	-0.746001	0.392461	0.0145449	0.0277931
ENSGALG00000010182	SLC29A1	2694.59	-0.745804	0.118843	1.06e-10	5.52e-10
ENSGALG00000028900	CENPT	7935.79	-0.744807	0.0516177	1.05e-47	7.05e-46
ENSGALG00000053446		2.28708	-0.74458	0.915213	0.0125616	0.0242946
ENSGALG00000013454	HOXB1	3.21548	-0.744533	0.906089	0.0135813	0.0260849
ENSGALG00000002583	PIK3CD	384.099	-0.74374	0.188332	2.34e-05	6.79e-05
ENSGALG00000026396	BG1	32.8232	-0.743712	0.369132	0.0114942	0.0224052
ENSGALG00000002647	PLS1	22.9513	-0.743154	0.465245	0.0257136	0.0467697
ENSGALG00000021027	PDCD7	2798.76	-0.743065	0.069231	2.21e-27	4.44e-26
ENSGALG00000006566	TBCCD1	1324.77	-0.743045	0.0737068	2.08e-24	3.39e-23
ENSGALG00000039249		443.102	-0.742968	0.23592	0.000476379	0.00117162
ENSGALG00000007268		19.4882	-0.742295	0.381094	0.0133499	0.0256774
ENSGALG00000000703	SLC45A3	165.27	-0.742073	0.208212	0.000108244	0.000289966
ENSGALG00000001022	CCDC43	3000.91	-0.741851	0.0658399	5.92e-30	1.42e-28
ENSGALG00000003777	NELL1	7.35692	-0.740991	0.89743	0.0146799	0.0280345
ENSGALG00000013383	PPIE	4505.84	-0.740895	0.0687242	1.33e-27	2.69e-26
ENSGALG00000004503		733.196	-0.740875	0.12652	1.46e-09	6.83e-09
ENSGALG00000010201	ABHD18	2485.49	-0.740408	0.0844718	5.82e-19	6.2e-18
ENSGALG00000000893	TAT	20.9469	-0.740186	0.46403	0.0260884	0.047414
ENSGALG00000030148	AUP1	5456.31	-0.73946	0.0764885	1.3e-22	1.87e-21
ENSGALG00000006144	CDK10	1055.99	-0.73943	0.116309	6.37e-11	3.39e-10
ENSGALG00000044230	ARHGAP27	63.0679	-0.738419	0.326408	0.00654321	0.0133324
ENSGALG00000049538	RPS28	41961.2	-0.738236	0.109553	4.99e-12	2.95e-11
ENSGALG00000050552		2481.54	-0.737607	0.0674668	2.54e-28	5.46e-27
ENSGALG00000028478	CELF3	154.076	-0.737278	0.231437	0.000428699	0.00106185
ENSGALG00000000538	RNF113B	2483.33	-0.736299	0.0806465	2.17e-20	2.56e-19
ENSGALG00000017073	BRCA2	2694.08	-0.735663	0.130548	5.47e-09	2.4e-08
ENSGALG00000034397	ENPP1	3.16174	-0.735507	0.957344	0.00851483	0.0169822
ENSGALG00000011494	CNOT10	3376.13	-0.735456	0.0940304	1.65e-15	1.31e-14
ENSGALG00000029256		5.49894	-0.735395	0.909114	0.0134188	0.0258006
ENSGALG00000049395		2057.62	-0.735143	0.121724	4.86e-10	2.37e-09
ENSGALG00000051755		8.01131	-0.734898	0.812382	0.0264398	0.0480091
ENSGALG00000029145	DCUN1D2	633.531	-0.7345	0.125165	1.38e-09	6.49e-09
ENSGALG00000041659		375.203	-0.733947	0.142903	8.78e-08	3.41e-07
ENSGALG00000007185	COQ5	1901.36	-0.733809	0.0985813	3.11e-14	2.22e-13
ENSGALG00000009731	ARHGAP11B	12575.6	-0.733759	0.0904644	1.6e-16	1.38e-15
ENSGALG00000034806		3.79645	-0.732983	0.851315	0.0210791	0.0390256
ENSGALG00000006069	SMTNL2	435.564	-0.732604	0.174592	8.42e-06	2.59e-05
ENSGALG00000028866	COASY	951.264	-0.732177	0.114754	5.61e-11	3.01e-10
ENSGALG00000034345		3996.96	-0.731503	0.0850951	2.64e-18	2.67e-17
ENSGALG00000001954	APTX	497.127	-0.731422	0.142877	9.68e-08	3.72e-07
ENSGALG00000050999		337.665	-0.731388	0.164206	2.64e-06	8.56e-06
ENSGALG00000049081		35.2023	-0.730835	0.418975	0.0208296	0.0386106
ENSGALG00000001613	GNL3	10384.1	-0.730686	0.0590239	1.09e-35	3.86e-34
ENSGALG00000037414	DNAJC28	296.416	-0.730437	0.137767	3.63e-08	1.46e-07
ENSGALG00000025774	HOXB2	727.192	-0.729437	0.109967	1.05e-11	6.07e-11
ENSGALG00000031045		217.451	-0.728486	0.199335	7.99e-05	0.000217566
ENSGALG00000052975	CCDC113	45.2332	-0.728269	0.364139	0.0125016	0.0241932
ENSGALG00000005442	PALMD	19.0885	-0.728004	0.424516	0.022205	0.0409479
ENSGALG00000051266		4308.41	-0.727983	0.0858587	7.38e-18	7.16e-17
ENSGALG00000045842		7691.4	-0.727832	0.0657259	5.49e-29	1.25e-27
ENSGALG00000001973	GNL2	4226.75	-0.726986	0.0701363	1.17e-25	2.11e-24
ENSGALG00000008256	BLM	3742.49	-0.726877	0.0554866	1.08e-39	4.56e-38
ENSGALG00000000540	GAS8	644.798	-0.726873	0.12281	1.05e-09	4.96e-09
ENSGALG00000016808		4419.76	-0.726762	0.0633778	6.32e-31	1.65e-29
ENSGALG00000037286	VIL1	112.9	-0.725436	0.237526	0.000691489	0.00166009
ENSGALG00000022920	SMYD5	3131.23	-0.725327	0.0866547	1.88e-17	1.76e-16
ENSGALG00000036833	PAXBP1	2588.95	-0.725303	0.144342	1.62e-07	6.08e-07
ENSGALG00000050519		3.71722	-0.725261	0.925984	0.0116396	0.0226722
ENSGALG00000048763		4.60473	-0.72486	0.985376	0.00637728	0.013019
ENSGALG00000045676	NELFE	4776.84	-0.724223	0.0765096	9.59e-22	1.28e-20
ENSGALG00000026791	gga-mir-6690	8.49343	-0.723987	0.44953	0.0269925	0.0489135
ENSGALG00000000820		122.846	-0.723726	0.205606	0.000135429	0.000358022
ENSGALG00000047313		282.841	-0.723576	0.177174	1.41e-05	4.22e-05
ENSGALG00000010609	NDUFAF7	3312.62	-0.723389	0.0759099	5.21e-22	7.12e-21
ENSGALG00000051392		709.274	-0.723177	0.141432	1.03e-07	3.94e-07
ENSGALG00000038133	SMIM3	222.286	-0.722105	0.163151	3.09e-06	9.98e-06
ENSGALG00000013156	ZNF830	1650.63	-0.721845	0.10728	5.64e-12	3.32e-11
ENSGALG00000032780	TTC13	1699.56	-0.72022	0.128557	6.95e-09	3.01e-08
ENSGALG00000039269	RNF213	502.88	-0.720142	0.160618	2.38e-06	7.78e-06
ENSGALG00000005277	RTCA	576.097	-0.719796	0.123157	1.67e-09	7.76e-09
ENSGALG00000043596	SNED1	740.088	-0.719525	0.142929	1.57e-07	5.91e-07
ENSGALG00000036993	RNF214	3488.46	-0.719431	0.0962963	2.65e-14	1.91e-13
ENSGALG00000004394		37.8725	-0.719285	0.444723	0.0271444	0.0491279
ENSGALG00000049711		21.0673	-0.719081	0.368094	0.0142546	0.027274
ENSGALG00000053516		162.378	-0.718764	0.19669	8.25e-05	0.000224357
ENSGALG00000000521	SPIRE2	121.846	-0.718595	0.207719	0.000172275	0.000449377
ENSGALG00000034021		71.8239	-0.718269	0.40813	0.021132	0.039108
ENSGALG00000010960	GALNT3	260.399	-0.718144	0.19846	9.49e-05	0.000255735
ENSGALG00000011281	SGO1	2382.88	-0.717103	0.106228	4.92e-12	2.91e-11
ENSGALG00000040433		2891.94	-0.716075	0.114357	1.27e-10	6.56e-10
ENSGALG00000043433	SCX	4.33544	-0.715923	0.918732	0.0125799	0.0243184
ENSGALG00000050677	BRICD5	386.833	-0.715825	0.17132	9.61e-06	2.93e-05
ENSGALG00000021238		30.9802	-0.71581	0.343664	0.0108143	0.0211723
ENSGALG00000023632		2955.15	-0.715563	0.120035	8.36e-10	4.01e-09
ENSGALG00000044299		106.49	-0.715492	0.304318	0.0056254	0.0115869
ENSGALG00000050615	CKAP2L	16332.9	-0.715026	0.0508662	2.38e-45	1.4e-43
ENSGALG00000048256		308.014	-0.715003	0.238356	0.000853258	0.00202268
ENSGALG00000003068	EZH1	2203.57	-0.714865	0.145751	3.1e-07	1.13e-06
ENSGALG00000032993	FTSJ3	6624.24	-0.714662	0.0517141	6.63e-44	3.59e-42
ENSGALG00000007610	CDC23	3014.87	-0.714372	0.0754775	1e-21	1.33e-20
ENSGALG00000011375	RNF25	1464.85	-0.713539	0.0784914	3.35e-20	3.91e-19
ENSGALG00000011000	TARBP1	3096.52	-0.712472	0.128221	9.26e-09	3.96e-08
ENSGALG00000011388	RABGGTB	3533.97	-0.711753	0.0643893	7.21e-29	1.62e-27
ENSGALG00000044141	THAP9	4595.74	-0.711373	0.122193	1.97e-09	9.07e-09
ENSGALG00000030712	COL2A1	98.3896	-0.711278	0.228604	0.000598121	0.00144912
ENSGALG00000038207		5921.79	-0.711275	0.148055	5.21e-07	1.84e-06
ENSGALG00000010157	TRAPPC6A	2257.08	-0.711119	0.0723539	2.92e-23	4.41e-22
ENSGALG00000001263	GTF2IRD1	1131.64	-0.7111	0.0970899	8.21e-14	5.66e-13
ENSGALG00000004477		1324.18	-0.711	0.130308	1.64e-08	6.84e-08
ENSGALG00000042661	MVB12A	4806.18	-0.710999	0.0651007	3.13e-28	6.71e-27
ENSGALG00000047479		24.4687	-0.71099	0.367573	0.015256	0.0290279
ENSGALG00000013604	VIP	8.32792	-0.710691	0.90257	0.0147198	0.0281007
ENSGALG00000010638	CASP3	2646.01	-0.710035	0.0871683	1.3e-16	1.13e-15
ENSGALG00000048773		535.708	-0.709718	0.199629	0.000124009	0.000329402
ENSGALG00000002002	BCAS2	2236.41	-0.709712	0.0861413	5.97e-17	5.36e-16
ENSGALG00000041266	CNN1	233.002	-0.709462	0.256035	0.00177244	0.00398867
ENSGALG00000054815		89.0703	-0.709198	0.306978	0.00637351	0.013013
ENSGALG00000015145	TMC1	167.733	-0.709189	0.278659	0.0034118	0.00731873
ENSGALG00000047668		4.12574	-0.708876	0.93953	0.0102719	0.0201666
ENSGALG00000002399		1461.79	-0.708813	0.148551	6.17e-07	2.16e-06
ENSGALG00000028937	TIMM13	4730.97	-0.707972	0.129949	1.74e-08	7.22e-08
ENSGALG00000033340		1640.28	-0.707915	0.162578	4.49e-06	1.43e-05
ENSGALG00000031497		67.6168	-0.707886	0.338371	0.0108656	0.0212649
ENSGALG00000002127	LSM10	1127.6	-0.707424	0.0929646	9.5e-15	7.13e-14
ENSGALG00000003540	CEP95	1492.41	-0.707089	0.0840946	1.44e-17	1.36e-16
ENSGALG00000035352	ZBTB17	5130.32	-0.707077	0.0781314	4.97e-20	5.74e-19
ENSGALG00000043765		3526.88	-0.707044	0.125207	5.59e-09	2.46e-08
ENSGALG00000053247		349.062	-0.706642	0.15899	2.98e-06	9.63e-06
ENSGALG00000007959	SLC26A3	35.4298	-0.706614	0.410853	0.0237043	0.0434835
[truncated: 2,770 more rows]

## Sheet: DEGs between KO day 0 VS day 5
		baseMean	log2FoldChange	lfcSE	pvalue	padj
ENSGALG00000037889	PTPRT	72.0493	7.14869	1.1337	1.09712e-14	1.01975e-13
ENSGALG00000053318		14.2078	5.77799	1.2696	2.31157e-09	1.33077e-08
ENSGALG00000050270		11.773	5.34755	1.33595	3.19969e-08	1.63621e-07
ENSGALG00000047089		10.853	5.22515	1.33539	4.98695e-08	2.49704e-07
ENSGALG00000028284	PTX3	345.086	5.05962	0.250989	1.36225e-92	4.66877e-90
ENSGALG00000035785		20.5081	4.94314	1.19578	3.44495e-08	1.7555e-07
ENSGALG00000002846	NEURL1B	274.227	4.88316	0.251733	5.87955e-86	1.75385e-83
ENSGALG00000053914	SLC16A13	9.33494	4.882	1.39634	2.41737e-07	1.1118e-06
ENSGALG00000050392		9.27163	4.85075	1.40799	2.84786e-07	1.29557e-06
ENSGALG00000016554	ACE2	107.786	4.75485	0.415178	1.60025e-32	5.03454e-31
ENSGALG00000016462	MYCN	9.15724	4.71201	1.47325	5.93569e-07	2.61092e-06
ENSGALG00000031450	MYO7A	8.20539	4.35948	1.57137	2.08149e-06	8.4947e-06
ENSGALG00000028760	gga-mir-6652	23.8269	4.2817	0.778221	1.44636e-10	9.38676e-10
ENSGALG00000009042	ISM1	122.958	4.21486	0.383764	4.01458e-30	1.08684e-28
ENSGALG00000053408		7.58633	4.09784	1.63854	4.52167e-06	1.76656e-05
ENSGALG00000008367	MDK	713.106	4.07147	0.496931	1.7606e-18	2.19842e-17
ENSGALG00000012850	RAB19	17.5443	3.9867	1.04102	2.15187e-07	9.9633e-07
ENSGALG00000051754	KRT17	84.6421	3.87672	0.479647	4.24808e-18	5.1761e-17
ENSGALG00000017179	PDGFD	24.9129	3.86547	0.920317	6.41048e-08	3.16943e-07
ENSGALG00000041491	ACKR4	67.249	3.70275	0.482393	1.0251e-16	1.11645e-15
ENSGALG00000034868	KRT7	3048.38	3.58186	0.0916281	0	0
ENSGALG00000048859		6.55943	3.52109	1.7609	1.88581e-05	6.8048e-05
ENSGALG00000027232	C1QTNF2	14.961	3.46141	1.22591	4.87499e-06	1.89907e-05
ENSGALG00000003690	KRT14	187.539	3.44753	0.247431	2.79402e-46	1.86747e-44
ENSGALG00000005747		12.9003	3.42557	1.12991	3.07573e-06	1.22361e-05
ENSGALG00000049299	TMEM170B	262.771	3.4253	0.194357	1.15627e-71	2.02447e-69
ENSGALG00000050129		6.3759	3.39404	1.77986	2.48663e-05	8.82845e-05
ENSGALG00000008080	C1QTNF4	19.8964	3.39324	0.807924	7.98609e-08	3.90291e-07
ENSGALG00000015908	COL12A1	1319.2	3.3881	0.12095	8.25014e-175	1.02226e-171
ENSGALG00000020554	ADAMTSL1	496.119	3.38237	0.154359	1.40116e-108	6.83934e-106
ENSGALG00000013200	GABBR2	5.96508	3.32294	1.7618	2.81646e-05	9.94029e-05
ENSGALG00000001462	ADORA3	6.07435	3.31762	1.77382	2.88045e-05	0.000101484
ENSGALG00000005936	AGTR2	123.451	3.31061	0.298821	1.02835e-30	2.93179e-29
ENSGALG00000041921	CWH43	447.188	3.25959	0.171331	7.02816e-83	1.91881e-80
ENSGALG00000015122	TAF4B	62.3807	3.2491	0.523282	2.98453e-12	2.26234e-11
ENSGALG00000034453	SAMD11	2304.98	3.24774	0.0912828	1.99671e-279	8.04075e-276
ENSGALG00000047196		32.2715	3.16615	0.52203	7.50026e-12	5.49905e-11
ENSGALG00000054647		14.6529	3.14333	1.15999	8.48153e-06	3.20706e-05
ENSGALG00000031637	ICOSLG	77.5005	3.13082	0.475988	2.89714e-13	2.40676e-12
ENSGALG00000053941		1672.58	3.10521	0.0823388	0	0
ENSGALG00000003473	SFRP1	13.4174	3.09278	1.32833	1.98591e-05	7.14999e-05
ENSGALG00000053217		43.462	3.03076	0.563959	4.17186e-10	2.58363e-09
ENSGALG00000001130	GALNT17	5.66216	3.00819	1.799	5.41914e-05	0.000183772
ENSGALG00000019719	KRT24	5.46362	3.00599	1.78289	5.39424e-05	0.000183004
ENSGALG00000004221	IL22RA1	157.961	2.93761	0.281348	1.18631e-27	2.76143e-26
ENSGALG00000008043	CORO2B	65.718	2.93226	0.374093	3.32535e-17	3.77482e-16
ENSGALG00000044739		84.5221	2.92141	0.386215	2.84711e-16	2.99356e-15
ENSGALG00000020561		19.7294	2.90006	0.777394	5.63609e-07	2.48457e-06
ENSGALG00000045125	GP5	119.911	2.89521	0.285519	2.82175e-26	5.94153e-25
ENSGALG00000027514	SCEL	364.294	2.75836	0.177566	1.86607e-56	1.95186e-54
ENSGALG00000035129	RBM12B	1448	2.75593	0.114867	3.05241e-129	2.04867e-126
ENSGALG00000020876	AOX2	41.5593	2.72076	0.471782	5.87141e-11	3.95718e-10
ENSGALG00000034213	TNFRSF1B	290.637	2.71852	0.178144	1.38046e-54	1.31576e-52
ENSGALG00000030209	CPZ	472.029	2.71377	0.196105	1.4789e-45	9.37876e-44
ENSGALG00000009268	FGG	133.269	2.69862	0.305106	8.97428e-21	1.3385e-19
ENSGALG00000050751		38.1563	2.66088	0.455714	4.07758e-11	2.78666e-10
ENSGALG00000042077	HIC1	1586.56	2.65764	0.169401	1.98413e-57	2.13069e-55
ENSGALG00000020160	ADH6	32.4278	2.62608	0.641242	1.78145e-07	8.32963e-07
ENSGALG00000002312	TMEM132E	4.97832	2.62593	1.78163	0.000113402	0.000368953
ENSGALG00000049810		36.1307	2.60672	0.494396	9.34473e-10	5.59364e-09
ENSGALG00000041634	ACTG2	217.708	2.60454	0.213681	4.26214e-36	1.63075e-34
ENSGALG00000006174	VSTM4	374.444	2.60361	0.169484	3.57733e-55	3.51364e-53
ENSGALG00000034024	RAPGEF5	67.9519	2.59573	0.397148	5.92587e-13	4.79187e-12
ENSGALG00000025884	NABP1	1588.48	2.5549	0.0843727	2.76659e-203	5.57052e-200
ENSGALG00000009493	TMEM229B	120.473	2.54677	0.301667	3.73822e-19	4.95191e-18
ENSGALG00000054357		10.7176	2.5302	1.3596	9.17419e-05	0.000302575
ENSGALG00000016967	ENOX1	18.6342	2.50486	0.913782	1.43222e-05	5.26236e-05
ENSGALG00000031375	CHST7	142.915	2.48446	0.333643	1.14537e-15	1.15166e-14
ENSGALG00000047321		58.8528	2.45409	0.355439	5.75788e-14	5.06819e-13
ENSGALG00000052574		11.4988	2.44917	1.14551	6.20239e-05	0.000209319
ENSGALG00000038320	COLGALT2	37.9601	2.44419	0.708237	1.91903e-06	7.86757e-06
ENSGALG00000012394		43.2327	2.42981	0.401032	1.34093e-11	9.62556e-11
ENSGALG00000029606	MYH1E	18.2966	2.4099	1.16585	7.52291e-05	0.000251044
ENSGALG00000050189		28.781	2.40436	0.766089	5.20461e-06	2.01917e-05
ENSGALG00000008815	LRRN4	3301.52	2.40363	0.132589	3.51576e-75	6.99159e-73
ENSGALG00000005321	LAMA5	15552.3	2.39362	0.063218	0	0
ENSGALG00000051582		14.3712	2.38779	1.19554	8.86487e-05	0.000293154
ENSGALG00000033453		430.229	2.36593	0.194793	1.10705e-35	4.05281e-34
ENSGALG00000011823	FAT4	386.782	2.36281	0.162153	8.23741e-50	6.31849e-48
ENSGALG00000048873	C3orf14	559.705	2.36218	0.15759	1.67348e-52	1.50595e-50
ENSGALG00000015425	LPL	179.062	2.35811	0.211618	1.38862e-30	3.89685e-29
ENSGALG00000027207	PERP2	265.595	2.33191	0.240093	4.6184e-24	8.46338e-23
ENSGALG00000013838	ADAM20	66.8333	2.30893	0.370951	5.2506e-12	3.89934e-11
ENSGALG00000039705	GFPT2	7987.74	2.28923	0.0731698	1.69054e-216	3.89017e-213
ENSGALG00000053371		31.7084	2.27166	0.545698	1.65591e-07	7.7629e-07
ENSGALG00000000604		187.665	2.2621	0.258285	3.36699e-20	4.84678e-19
ENSGALG00000010974	GSC	121.603	2.25263	0.266606	4.82722e-19	6.3217e-18
ENSGALG00000011681	DEPDC7	28.3696	2.25253	0.95861	4.97957e-05	0.000170118
ENSGALG00000042454	DCDC2	18.5876	2.2514	1.01491	6.74152e-05	0.000226329
ENSGALG00000048587		4.54862	2.24321	1.74063	0.00023632	0.000731624
ENSGALG00000047024	ZNF469	4680.49	2.24272	0.0771247	1.6804e-187	2.70679e-184
ENSGALG00000052880		103.332	2.24101	0.30817	4.92179e-15	4.6967e-14
ENSGALG00000016868	NALCN	71.8098	2.23185	0.375169	2.75965e-11	1.92852e-10
ENSGALG00000051438	EXTL2	214.675	2.23007	0.244277	1.23328e-21	1.95529e-20
ENSGALG00000015219		104.12	2.22201	0.309404	9.44268e-15	8.85863e-14
ENSGALG00000042505	DSEL	89.8941	2.22037	0.312173	1.53979e-14	1.41893e-13
ENSGALG00000001564	ATP2A3	78.0953	2.21942	0.524138	1.26914e-07	6.0376e-07
ENSGALG00000006563	SEMA3D	44.8348	2.2187	0.444616	4.49574e-09	2.50839e-08
ENSGALG00000049027		267.165	2.21183	0.26241	5.80827e-19	7.56343e-18
ENSGALG00000008185	AOX1	18.1931	2.20637	1.01388	7.85532e-05	0.000261379
ENSGALG00000053746		20.2638	2.19599	0.755057	1.22786e-05	4.54466e-05
ENSGALG00000015066	WASF1	55.9212	2.18407	0.385951	1.42534e-10	9.25784e-10
ENSGALG00000015511	ROBO1	24.765	2.17355	0.630934	2.37212e-06	9.59811e-06
ENSGALG00000007543	APCDD1L	2596.23	2.16827	0.103323	2.36039e-99	9.50528e-97
ENSGALG00000032060	GPR153	160.024	2.15933	0.312255	6.02659e-14	5.29027e-13
ENSGALG00000011298	RARB	24.0504	2.15924	0.582416	9.67055e-07	4.12753e-06
ENSGALG00000033270		47.8746	2.1587	0.487782	5.83847e-08	2.90176e-07
ENSGALG00000000225	MGAT4C	30.0517	2.15764	0.586205	1.06445e-06	4.5181e-06
ENSGALG00000005441	NFIB	61.0106	2.15695	0.370273	5.58459e-11	3.77335e-10
ENSGALG00000012179	SOCS4	558.615	2.13285	0.117949	1.13089e-74	2.2215e-72
ENSGALG00000028803	B3GNT4	99.9618	2.13066	0.403664	1.07117e-09	6.38816e-09
ENSGALG00000052626		118.608	2.11485	0.267567	4.10588e-17	4.63473e-16
ENSGALG00000047057		32.3247	2.11281	0.595882	1.75374e-06	7.2434e-06
ENSGALG00000013342	GBX2	277.733	2.10194	0.201347	3.27262e-27	7.37278e-26
ENSGALG00000050645		17.5079	2.10119	0.823133	3.61195e-05	0.000125472
ENSGALG00000027355	TPBG	24.8642	2.10042	0.78173	2.52411e-05	8.95166e-05
ENSGALG00000051001		168.948	2.09876	0.230599	1.57329e-21	2.47004e-20
ENSGALG00000005762	BIRC7	70.3527	2.09466	0.383366	4.01758e-10	2.49096e-09
ENSGALG00000042419	KCTD17	20.5069	2.09278	0.828452	3.91049e-05	0.000135259
ENSGALG00000013980	SLC2A12	182.059	2.09112	0.28181	1.61218e-15	1.59809e-14
ENSGALG00000053434		493.127	2.08903	0.149442	4.96815e-46	3.3069e-44
ENSGALG00000012260	LCT	82.226	2.0606	0.278356	1.79041e-15	1.76607e-14
ENSGALG00000051786		36.4647	2.05573	0.467456	6.65641e-08	3.27995e-07
ENSGALG00000003642	PDGFA	332.624	2.05107	0.160907	7.13709e-39	3.20235e-37
ENSGALG00000039238	SALL1	120.157	2.05012	0.362362	1.37112e-10	8.92001e-10
ENSGALG00000006106	TNFRSF6B	2414.9	2.0443	0.143684	1.42477e-47	1.0155e-45
ENSGALG00000041042	GABRG3	735.665	2.03936	0.127934	7.96068e-59	8.9049e-57
ENSGALG00000040256	RIMS2	52.8379	2.03864	0.514751	3.97185e-07	1.78277e-06
ENSGALG00000003882	SMARCE1	5348.63	2.03816	0.0631393	3.65995e-230	1.17909e-226
ENSGALG00000007677	THNSL1	297.925	2.03213	0.232489	3.68438e-20	5.28477e-19
ENSGALG00000011594	NR1H4	147.628	2.03028	0.296056	8.20786e-14	7.12735e-13
ENSGALG00000011488	CMTM7	134.336	2.02135	0.28143	8.48086e-15	7.97488e-14
ENSGALG00000051383		217.889	2.01335	0.190305	6.87249e-28	1.61609e-26
ENSGALG00000002957		74.8066	2.00824	0.384712	1.3816e-09	8.12813e-09
ENSGALG00000000761	TSKU	2032.19	2.00709	0.0963157	4.85334e-98	1.86137e-95
ENSGALG00000034722	TLR2A	38.014	2.00391	0.435453	2.7064e-08	1.39459e-07
ENSGALG00000014820	VTCN1	43.9784	2.00348	0.511599	4.76875e-07	2.12255e-06
ENSGALG00000008257	MERTK	346.823	2.0009	0.137461	1.18164e-49	9.02082e-48
ENSGALG00000019718	KRT13	112.27	2.00043	0.238379	6.98868e-19	9.04933e-18
ENSGALG00000033144	COLEC10	706.978	1.98242	0.179088	3.22491e-30	8.80456e-29
ENSGALG00000006871	SLCO3A1	2874.66	1.97123	0.0783449	2.63807e-141	2.02352e-138
ENSGALG00000040532	ZIC1	99.1603	1.9523	0.319893	9.55678e-12	6.94052e-11
ENSGALG00000015021	TMEM174	512.686	1.94608	0.149086	1.15193e-40	5.7093e-39
ENSGALG00000009239	TLR2B	10.4621	1.94314	1.27893	0.000388831	0.00115794
ENSGALG00000013183	TERT	8604.49	1.943	0.0910725	1.21941e-102	5.45618e-100
ENSGALG00000026098	IL8	1495.57	1.9419	0.0890239	3.91407e-107	1.80137e-104
ENSGALG00000048737		38.7355	1.94134	0.490698	4.15282e-07	1.86126e-06
ENSGALG00000014883	MCM9	119.717	1.93913	0.342566	1.23925e-10	8.0948e-10
ENSGALG00000049657		36.4599	1.93416	0.492346	4.64277e-07	2.06991e-06
ENSGALG00000054110		40.9684	1.9308	0.530042	1.37574e-06	5.75895e-06
ENSGALG00000051780		67.1735	1.92867	0.404282	1.21799e-08	6.52025e-08
ENSGALG00000049965		295.839	1.92719	0.168885	6.14124e-32	1.88425e-30
ENSGALG00000016299	FAM83B	99.3387	1.91683	0.30882	4.85361e-12	3.61285e-11
ENSGALG00000016362	SH3YL1	65.8958	1.91676	0.452999	1.35649e-07	6.42847e-07
ENSGALG00000013197	GALNT12	105.514	1.91668	0.284538	1.61102e-13	1.36653e-12
ENSGALG00000014758	ARHGAP28	1382.44	1.91662	0.143208	1.35327e-42	7.38932e-41
ENSGALG00000000396	METTL2B	1039.18	1.91598	0.090359	1.84417e-101	8.0286e-99
ENSGALG00000028250	ANKRD22	37.5951	1.91472	0.586258	5.2145e-06	2.02252e-05
ENSGALG00000005208	S1PR1	104.511	1.91101	0.342105	1.82885e-10	1.17134e-09
ENSGALG00000035972	KRT75	8.619	1.9002	1.32125	0.000460692	0.00135293
ENSGALG00000034713		57.5454	1.89914	0.473886	3.41987e-07	1.54349e-06
ENSGALG00000019802	PHLDA3	69.7528	1.89752	0.329157	6.58344e-11	4.42596e-10
ENSGALG00000012319		140.14	1.88571	0.241128	5.80443e-17	6.44812e-16
ENSGALG00000030802	SHROOM2	464.839	1.88265	0.146233	1.00641e-39	4.78206e-38
ENSGALG00000005120	FBLN2	81.9478	1.87916	0.387464	8.16381e-09	4.43666e-08
ENSGALG00000033279	RAX	23.2911	1.87621	0.585121	6.56939e-06	2.51532e-05
ENSGALG00000054813		4.36875	1.87596	1.67407	0.000481224	0.00140989
ENSGALG00000034894		13.76	1.87349	1.05644	0.000298685	0.000907436
ENSGALG00000052589		93.7457	1.87304	0.29559	2.03286e-12	1.56078e-11
ENSGALG00000053315		116.158	1.86939	0.255749	2.67309e-15	2.58763e-14
ENSGALG00000054048		880.224	1.86546	0.156577	1.4626e-34	5.0775e-33
ENSGALG00000023904	FIBIN	7414.21	1.86438	0.211344	1.32556e-20	1.95175e-19
ENSGALG00000030253	RBM12	2537.37	1.85934	0.127165	3.25269e-50	2.56835e-48
ENSGALG00000029596	HAS2	212.948	1.85726	0.223179	9.50445e-19	1.21893e-17
ENSGALG00000021031	CXCR7	838.56	1.84832	0.0948451	2.3421e-86	7.11822e-84
ENSGALG00000005512	KIAA1671	98.5067	1.84759	0.323073	8.10301e-11	5.38463e-10
ENSGALG00000054551		62.2341	1.83742	0.379642	8.40229e-09	4.56319e-08
ENSGALG00000007713	CD300LG	9.57022	1.83401	1.25423	0.000513918	0.00150022
ENSGALG00000014236	ATP8A1	52.9988	1.82393	0.502255	1.51837e-06	6.33459e-06
ENSGALG00000049871		12981.2	1.81777	0.0563538	4.65201e-230	1.24891e-226
ENSGALG00000052956		4.16473	1.815	1.64707	0.000549792	0.00159569
ENSGALG00000009523	CNTN1	495.008	1.79453	0.548412	5.64931e-06	2.17805e-05
ENSGALG00000001392	MMP23B	1014.38	1.79411	0.105427	8.10838e-67	1.19825e-64
ENSGALG00000013018	TPRKB	655.379	1.7906	0.130601	1.07287e-44	6.52144e-43
ENSGALG00000008909	USP13	103.711	1.7888	0.275962	6.99444e-13	5.61647e-12
ENSGALG00000011136	CAPN9	198.075	1.78821	0.234117	1.91953e-16	2.04902e-15
ENSGALG00000005145	SS18L1	14.0674	1.78274	0.863606	0.000190744	0.000599746
ENSGALG00000030800	IL31RA	842.697	1.77898	0.121111	9.1228e-51	7.5359e-49
ENSGALG00000054453		54.5048	1.77635	0.483545	1.32995e-06	5.58323e-06
ENSGALG00000006969	USP28	660.993	1.77313	0.139216	4.12685e-39	1.88315e-37
ENSGALG00000005905	ZDHHC4	168.655	1.7726	0.24191	1.91635e-15	1.88683e-14
ENSGALG00000003677	NTNG2	125.096	1.77092	0.293573	1.15707e-11	8.35043e-11
ENSGALG00000033520	DCSTAMP	395.179	1.77028	0.14566	5.93919e-36	2.24574e-34
ENSGALG00000034107	TRIM63	109.292	1.77017	0.266028	2.17469e-13	1.82068e-12
ENSGALG00000023454	C9ORF152	25.7564	1.76925	0.693209	5.56349e-05	0.000188429
ENSGALG00000040369	PFKFB3	1735.25	1.76869	0.0994885	1.27718e-72	2.33782e-70
ENSGALG00000002443	FBXL16	54.0375	1.75525	0.542408	6.6363e-06	2.53793e-05
ENSGALG00000028142	HACD4	13.7233	1.75478	0.865357	0.000217562	0.000677852
ENSGALG00000002260	CISH	4882.18	1.75323	0.103659	4.04211e-66	5.81341e-64
ENSGALG00000017242	FZD4	148.633	1.74577	0.288164	9.54834e-12	6.93751e-11
ENSGALG00000006425	SLC6A6	112.142	1.7433	0.338054	1.60182e-09	9.35199e-09
ENSGALG00000027345	SLC46A2	36.9294	1.74147	0.659778	4.50763e-05	0.000154982
ENSGALG00000034326	TMEM158	5181.05	1.74075	0.111512	6.51644e-57	6.86058e-55
ENSGALG00000038902	PIM1	6897.4	1.7392	0.0680069	3.40678e-146	2.74382e-143
ENSGALG00000033063	GINS2	553.755	1.73759	0.136222	2.84014e-39	1.30711e-37
ENSGALG00000003886	SGCD	49.8073	1.73437	0.431023	3.3344e-07	1.50745e-06
ENSGALG00000038624		173.563	1.73419	0.183475	2.84848e-23	4.98732e-22
ENSGALG00000031294	MPLKIP	394.7	1.73303	0.16072	3.74808e-29	9.59841e-28
ENSGALG00000027323	MYH1D	81.0496	1.73201	0.381623	3.41998e-08	1.74498e-07
ENSGALG00000013409		7.25402	1.732	1.35875	0.000735356	0.0020913
ENSGALG00000014573	NAT10	3118.35	1.72945	0.0974705	2.01086e-72	3.599e-70
ENSGALG00000001534	TMEM88B	54.1127	1.72615	0.418108	2.14577e-07	9.93792e-07
ENSGALG00000004669	ASPA	206.854	1.72489	0.230155	4.97519e-16	5.12734e-15
ENSGALG00000019077		66.5154	1.71767	0.421006	2.64653e-07	1.20937e-06
ENSGALG00000015428	PSD3	77.6066	1.70402	0.356972	1.10426e-08	5.93307e-08
ENSGALG00000010930	STK39	3.98202	1.70294	1.6074	0.000697593	0.00199129
ENSGALG00000030913		125.848	1.696	0.324461	1.07222e-09	6.39204e-09
ENSGALG00000011813	HEG1	262.157	1.69546	0.215614	2.67411e-17	3.05711e-16
ENSGALG00000000866	SELENBP1	955.282	1.69257	0.13415	1.40872e-38	6.2169e-37
ENSGALG00000030773	CP	1058.12	1.69188	0.103653	5.95274e-62	7.3759e-60
ENSGALG00000040802	SOWAHA	4.04867	1.69128	1.60888	0.000710367	0.00202488
ENSGALG00000038652		151.698	1.68946	0.27005	2.57788e-12	1.96334e-11
ENSGALG00000043035	SHISA2	6851.35	1.68291	0.0901399	7.47228e-80	1.77005e-77
ENSGALG00000005204		416.763	1.68279	0.156123	3.33111e-29	8.57148e-28
ENSGALG00000012128	IMMP1L	633.443	1.68101	0.152356	2.02415e-30	5.61187e-29
ENSGALG00000042257	MYH1F	155.607	1.66855	0.250209	1.6686e-13	1.41313e-12
ENSGALG00000004505	CCDC137	1956.11	1.66444	0.110806	4.12682e-53	3.75668e-51
ENSGALG00000008901	PTGFR	889.947	1.66108	0.139893	1.18342e-34	4.13505e-33
ENSGALG00000051995		8.79789	1.65835	1.30799	0.000876281	0.00245694
ENSGALG00000050186		15.0297	1.65264	0.707131	0.000120699	0.000391113
ENSGALG00000021443	PANX3	410.345	1.64283	0.156944	8.2182e-28	1.92691e-26
ENSGALG00000016173	UBASH3A	11.205	1.64197	1.03629	0.000646144	0.00185561
ENSGALG00000046507		620.144	1.64158	0.137133	3.48222e-35	1.24648e-33
ENSGALG00000027655	TRABD2B	12.1402	1.64118	1.01287	0.000610572	0.00175847
ENSGALG00000012735	EDN1	312.645	1.63615	0.174153	3.73093e-23	6.44827e-22
ENSGALG00000028158	FGF7	12.3392	1.6344	1.08711	0.000740665	0.00210528
ENSGALG00000012163	BDNF	40.4407	1.62935	0.413466	4.9788e-07	2.21176e-06
ENSGALG00000040794	CCNE2	645.219	1.62863	0.125748	1.53767e-40	7.52671e-39
ENSGALG00000001727	LZTS1	3064.21	1.62835	0.070062	1.21325e-121	6.97963e-119
ENSGALG00000000731	THEMIS2	18.3301	1.62026	0.847355	0.00036141	0.00108208
ENSGALG00000026153	FOXO6	141.158	1.61938	0.2931	1.98945e-10	1.26815e-09
ENSGALG00000029795	FAM131A	26.7617	1.61119	0.696686	0.000138588	0.000445229
ENSGALG00000052645		334.922	1.61086	0.189949	1.36709e-19	1.85989e-18
ENSGALG00000037665	LMBR1L	219.702	1.60668	0.183507	1.23252e-20	1.81808e-19
ENSGALG00000019171	GATD3A	1064.95	1.60124	0.0903445	1.72254e-72	3.11761e-70
ENSGALG00000032679	GCSH	929.868	1.60092	0.107083	9.61423e-53	8.70033e-51
ENSGALG00000017405	NPR3	236.424	1.5971	0.297169	4.61995e-10	2.85018e-09
ENSGALG00000043694	RAPGEF4	7.53014	1.59353	1.34716	0.00104147	0.00288347
ENSGALG00000055053	PRSS35	123.422	1.59335	0.253229	1.85758e-12	1.42962e-11
ENSGALG00000039168	SCFD2	1640.17	1.58817	0.0943809	9.23316e-66	1.28214e-63
ENSGALG00000045196	LAPTM4B	26.6488	1.58795	0.631371	8.22742e-05	0.000273168
ENSGALG00000029301	BMP2	1863.32	1.58696	0.0869954	1.43542e-76	2.96432e-74
ENSGALG00000031266		80.6544	1.5855	0.462087	3.92943e-06	1.54539e-05
ENSGALG00000009855	TBC1D9	65.9866	1.58394	0.379729	1.90174e-07	8.84333e-07
ENSGALG00000008850	TTLL7	41.2061	1.58179	0.406842	6.45339e-07	2.82093e-06
ENSGALG00000055135		91.3653	1.58179	0.278998	8.53457e-11	5.6644e-10
ENSGALG00000006854	NEURL2	57.9226	1.58155	0.360563	7.17449e-08	3.52123e-07
ENSGALG00000046879		3.81502	1.57856	1.56116	0.000914613	0.00255419
ENSGALG00000030603	ANTXR1	1664.83	1.57719	0.0753388	1.50865e-99	6.2311e-97
ENSGALG00000050998		29.0925	1.576	0.525844	1.8614e-05	6.72425e-05
ENSGALG00000037675	COL14A1	40.6261	1.5752	1.24133	0.0010703	0.00295668
ENSGALG00000003283		1158.14	1.57426	0.158767	2.03896e-25	4.05977e-24
ENSGALG00000042269	METTL25	177.574	1.57251	0.211307	5.72725e-16	5.88358e-15
ENSGALG00000031734	AQP11	104.976	1.57125	0.294511	5.74339e-10	3.51366e-09
ENSGALG00000053860		1153.48	1.56636	0.106754	5.42361e-51	4.55018e-49
ENSGALG00000033118	FAM83H	661.074	1.56448	0.125081	3.7882e-38	1.61838e-36
ENSGALG00000005580	TMEM56	127.051	1.56279	0.280137	1.44623e-10	9.38676e-10
ENSGALG00000015154	TRPM6	8.25229	1.56174	1.25835	0.00111987	0.00308355
ENSGALG00000004695	ECM2	1001.25	1.56154	0.136344	1.26652e-32	4.01596e-31
ENSGALG00000011394	CYP2J21	105.506	1.55924	0.275295	8.80541e-11	5.83213e-10
ENSGALG00000032584	ALX4	354.491	1.55473	0.193204	4.77215e-18	5.78838e-17
ENSGALG00000002955	ADAMTSL2	9475.91	1.55461	0.105596	2.53396e-51	2.17111e-49
ENSGALG00000015234		656.173	1.55381	0.113769	9.92074e-45	6.07617e-43
ENSGALG00000047614		8.54143	1.55222	1.1056	0.00100962	0.00280009
ENSGALG00000028308	TNS4	1184.39	1.5513	0.0956939	2.28183e-61	2.76358e-59
ENSGALG00000002982	SLC2A6	787.142	1.5489	0.153042	2.44886e-26	5.1903e-25
ENSGALG00000048847		248.435	1.54635	0.182302	1.22445e-19	1.67574e-18
ENSGALG00000009837	DTL	1230.95	1.54564	0.155923	1.99953e-25	3.98618e-24
ENSGALG00000014603	C1S	548.321	1.54556	0.110008	4.16375e-47	2.85403e-45
ENSGALG00000012588	KIF27	61.7879	1.5365	0.397677	7.49304e-07	3.24806e-06
ENSGALG00000008193	RELN	113.924	1.53288	0.316012	7.6952e-09	4.19189e-08
ENSGALG00000004162	SLC16A6	156.643	1.52923	0.29661	1.55436e-09	9.08805e-09
ENSGALG00000041408		590.714	1.52869	0.143108	6.55009e-29	1.646e-27
ENSGALG00000031331	PKIG	34.9224	1.52715	0.498255	1.59518e-05	5.82262e-05
ENSGALG00000002553	PCDH1	568.221	1.51988	0.13675	5.58564e-31	1.60667e-29
ENSGALG00000030084	EXOSC7	1975.6	1.51676	0.0978935	1.93131e-56	2.00706e-54
ENSGALG00000007178	FADS2	6477.19	1.51375	0.10829	1.06984e-46	7.24074e-45
ENSGALG00000011803	EMP1	10496.6	1.5137	0.0527941	4.23145e-183	6.19638e-180
ENSGALG00000040929	C15orf62	155.991	1.5132	0.259762	3.40111e-11	2.34726e-10
ENSGALG00000014268	CHRNA9	19.796	1.51073	0.765348	0.000393595	0.00117169
ENSGALG00000028186	RERG	147.171	1.5042	0.314148	1.0828e-08	5.83138e-08
ENSGALG00000014386	SEPSECS	1202.83	1.50275	0.120118	3.31017e-38	1.43334e-36
ENSGALG00000041273	KIAA0319	8.4721	1.49915	1.27097	0.00133222	0.00361513
ENSGALG00000055127		7.47178	1.49824	1.23454	0.00132811	0.00360645
ENSGALG00000054582		8.56826	1.49076	0.954802	0.000936613	0.00261065
ENSGALG00000032838	BKJ	652.126	1.48855	0.195146	1.32209e-16	1.42928e-15
ENSGALG00000005806	KIF24	295.097	1.48842	0.158426	3.01026e-23	5.25345e-22
ENSGALG00000023866		50.7233	1.48704	0.418739	2.84428e-06	1.13687e-05
ENSGALG00000039346	ARHGAP39	754.224	1.48634	0.133641	5.00692e-31	1.45057e-29
ENSGALG00000048184		14.7811	1.48515	0.97368	0.00100417	0.0027869
ENSGALG00000014038	CDC123	507.428	1.48422	0.119706	1.32785e-37	5.47034e-36
ENSGALG00000043219	HOXB3	441.784	1.48307	0.122619	5.64447e-36	2.14437e-34
ENSGALG00000000377	HNRNPM	10671.3	1.47896	0.0559959	4.69495e-156	3.98033e-153
ENSGALG00000022440	EVA1B	235.269	1.47339	0.179564	1.25274e-18	1.5889e-17
ENSGALG00000047829		221.577	1.46759	0.181551	3.45005e-18	4.22933e-17
ENSGALG00000051022		53.8442	1.46443	0.397021	1.70928e-06	7.07066e-06
ENSGALG00000007218	MB21D2	497.179	1.46297	0.126452	2.97371e-33	9.65736e-32
ENSGALG00000030377	MDFI	27.0319	1.46278	0.604777	0.000137762	0.000442841
ENSGALG00000013887	FAM210A	1257.64	1.46005	0.0933158	1.70028e-57	1.83812e-55
ENSGALG00000046715		189.494	1.45572	0.184939	1.95622e-17	2.25722e-16
ENSGALG00000000560		23.159	1.4552	0.552383	7.40352e-05	0.00024747
ENSGALG00000052355	PDE12	1637.32	1.45314	0.113744	1.11685e-39	5.27575e-38
ENSGALG00000026846	JMJD7	117.714	1.45302	0.294264	5.33417e-09	2.95776e-08
ENSGALG00000004074	KCNS1	132.923	1.44733	0.278055	1.28746e-09	7.61044e-09
ENSGALG00000008807	DCUN1D1	2842.15	1.44671	0.104918	1.46193e-45	9.30782e-44
ENSGALG00000034590	CELF2	30.2466	1.44245	0.506705	3.88114e-05	0.000134359
ENSGALG00000003854	IFT81	1523.8	1.43792	0.0976444	2.14653e-51	1.85894e-49
ENSGALG00000045898		29.6225	1.43792	0.746488	0.000515722	0.00150466
ENSGALG00000002790	ABLIM3	3.64124	1.43346	1.5007	0.00127348	0.0034727
ENSGALG00000003149		791.573	1.42793	0.135893	4.18825e-28	1.00095e-26
ENSGALG00000049741	SMIM18	258.692	1.42572	0.175192	2.28613e-18	2.83706e-17
ENSGALG00000002298	COL8A2	32.2035	1.42538	0.604235	0.000176684	0.000558264
ENSGALG00000043618	SLC40A1	464.574	1.42417	0.182339	3.29387e-17	3.74172e-16
ENSGALG00000017125	MICU2	592.742	1.42401	0.132724	3.90969e-29	9.99638e-28
ENSGALG00000014646	SYT11	1048.08	1.42268	0.123907	8.45065e-33	2.70086e-31
ENSGALG00000044313		260.85	1.41758	0.165595	6.35752e-20	8.88949e-19
ENSGALG00000005331	GJC2	1604.34	1.41741	0.103638	7.07707e-45	4.35105e-43
ENSGALG00000036792	TIGD5	144.18	1.41727	0.228423	3.52259e-12	2.65397e-11
ENSGALG00000033919		4.92641	1.4165	1.55912	0.0011689	0.00320651
ENSGALG00000046724	PRRG3	177.535	1.41443	0.245761	5.7788e-11	3.89803e-10
ENSGALG00000029829	RNLS	97.9135	1.4125	0.268677	1.02449e-09	6.11431e-09
ENSGALG00000032428		296.605	1.41218	0.250669	1.19607e-10	7.82864e-10
ENSGALG00000011254	SATB1	29.9091	1.41176	0.730706	0.000540847	0.00157221
ENSGALG00000015708	FGFR3	901.051	1.41095	0.111559	5.95561e-39	2.67969e-37
ENSGALG00000005643	LYVE1	170.93	1.40982	0.276646	2.47925e-09	1.42272e-08
ENSGALG00000003594	ANK1	75.0228	1.40781	0.323788	1.06855e-07	5.13032e-07
ENSGALG00000052394		3.57845	1.40777	1.4863	0.00135985	0.00368141
ENSGALG00000052636		286.764	1.40728	0.162778	3.07394e-20	4.43683e-19
ENSGALG00000012705	GMPR2	158.789	1.40714	0.255695	2.58101e-10	1.62975e-09
ENSGALG00000048128		15.1406	1.40498	1.07031	0.00159276	0.00425899
ENSGALG00000003819		19.1744	1.4047	0.79326	0.000780298	0.00220858
ENSGALG00000006677	P4HA2	10055.4	1.40029	0.0594209	4.23505e-125	2.5266e-122
ENSGALG00000038421	RWDD3	303.283	1.39737	0.1791	3.68405e-17	4.17026e-16
ENSGALG00000005080	C8H1orf27	1632.4	1.39256	0.0913541	9.37641e-55	9.04402e-53
ENSGALG00000032980	DLGAP3	34.825	1.38741	0.458044	2.36963e-05	8.44282e-05
ENSGALG00000016581	TCEANC	207.966	1.38711	0.194083	5.67864e-15	5.39019e-14
ENSGALG00000039461	TNFRSF1A	2662.85	1.38521	0.0724353	8.21955e-84	2.3643e-81
ENSGALG00000005071	MPP1	8114.58	1.38304	0.0612023	2.29688e-115	1.23327e-112
ENSGALG00000007681	HTR2B	102.178	1.38284	0.309481	6.38151e-08	3.15646e-07
ENSGALG00000016557	BMX	9.31183	1.38163	0.950865	0.0014384	0.00387778
ENSGALG00000041522	CLCF1	952.661	1.38065	0.0906996	1.33231e-54	1.27743e-52
ENSGALG00000004728	RGL1	3590.25	1.38009	0.0895107	6.53384e-56	6.66121e-54
ENSGALG00000031548		152.194	1.37609	0.288417	1.45575e-08	7.74411e-08
ENSGALG00000013929	PDGFRA	196.423	1.36983	0.328897	2.69346e-07	1.22942e-06
ENSGALG00000001183	MYH10	59548.8	1.36669	0.0726021	2.54452e-81	6.61082e-79
ENSGALG00000002008	RNF157	5.52411	1.36651	1.55902	0.00124108	0.00339238
ENSGALG00000034999	ZHX1	716.197	1.36515	0.155081	8.33211e-21	1.24387e-19
ENSGALG00000005696	ABHD6	759.928	1.36268	0.113578	2.11017e-35	7.63833e-34
ENSGALG00000007170	SNRPA1	6179.21	1.35451	0.0780494	1.01593e-69	1.65299e-67
ENSGALG00000023355	TMEM154	15.6495	1.35189	0.864529	0.0013102	0.00356379
ENSGALG00000043118	ATP10A	1450.55	1.34764	0.0851833	1.29684e-58	1.43078e-56
ENSGALG00000002864	LRRTM3	2713.49	1.34472	0.122567	3.26914e-30	8.9102e-29
ENSGALG00000015143	TTR	197.467	1.34365	0.254699	1.0887e-09	6.47629e-09
ENSGALG00000003099	PCTP	14.2734	1.3433	0.861536	0.00134981	0.00365732
ENSGALG00000006053	SLC2A11	539.624	1.34247	0.119211	1.2695e-31	3.81321e-30
ENSGALG00000036067	RBFA	216.316	1.3391	0.17804	3.86436e-16	4.01853e-15
ENSGALG00000001729	CD276	2104.39	1.33838	0.0817288	1.6834e-62	2.10203e-60
ENSGALG00000052522		13.5437	1.33353	0.748608	0.000911471	0.0025463
ENSGALG00000051213	DUSP21	59.9216	1.32951	0.362921	2.54555e-06	1.02458e-05
ENSGALG00000027874	CHAC1	777.706	1.32946	0.149883	5.08174e-21	7.70053e-20
ENSGALG00000004310	TTYH3	596.533	1.329	0.18402	3.82971e-15	3.66978e-14
ENSGALG00000008438	SLC35C1	1212.94	1.32797	0.0867744	4.47994e-55	4.37351e-53
ENSGALG00000011312	OXSM	352.03	1.32631	0.148287	2.62484e-21	4.05122e-20
ENSGALG00000013660	ZNF516	390.883	1.32608	0.153111	3.31506e-20	4.78058e-19
ENSGALG00000011902	TAGLN	8165.16	1.32375	0.106931	2.20225e-37	8.9807e-36
ENSGALG00000005452	TADA2A	403.678	1.32361	0.147632	2.18244e-21	3.38677e-20
ENSGALG00000049080		9.41751	1.32128	1.00281	0.00198365	0.00520655
ENSGALG00000050440		45.904	1.31821	0.51247	0.00012312	0.000398395
ENSGALG00000042375		834.335	1.31762	0.163871	6.68733e-18	8.00293e-17
ENSGALG00000014264	NSUN7	138.714	1.31692	0.34566	1.44589e-06	6.04005e-06
ENSGALG00000051379		70.0995	1.31673	0.368609	3.79604e-06	1.49649e-05
ENSGALG00000043015	FOXS1	10.1362	1.31668	1.14384	0.00221856	0.00577233
ENSGALG00000029766	ITGB5	1027.82	1.31646	0.108396	4.11623e-36	1.58244e-34
ENSGALG00000011798	HEBP1	78.3151	1.31401	0.357303	2.51011e-06	1.01234e-05
ENSGALG00000028998	XPA	2667.22	1.31381	0.0953626	2.33515e-45	1.46932e-43
ENSGALG00000024083	TCIM	13798.6	1.31299	0.0746074	1.63199e-71	2.82667e-69
ENSGALG00000052640		4.68789	1.31161	1.50204	0.00151058	0.00405723
ENSGALG00000049702		4.81072	1.31074	1.50687	0.00149522	0.00401885
ENSGALG00000020067	VASH2	615.037	1.30915	0.129315	3.13182e-26	6.57724e-25
ENSGALG00000016709	RCAN2	175.944	1.30764	0.311591	2.76735e-07	1.26208e-06
ENSGALG00000007631	MEGF11	13.6395	1.3073	0.822191	0.00140828	0.0038023
ENSGALG00000052918		33.5701	1.30724	0.53367	0.000182056	0.000574
ENSGALG00000014998	CABLES1	158.907	1.30447	0.232731	1.88139e-10	1.20212e-09
ENSGALG00000040023	MAPK11	14.1805	1.30247	0.945429	0.00195651	0.00514538
ENSGALG00000001883	ST6GALNAC2	31.493	1.30238	0.716133	0.000914057	0.00255308
ENSGALG00000014176	PLA2G2E	21.8967	1.30181	0.559116	0.000260139	0.000798612
ENSGALG00000005631	TRPM2	463.506	1.30016	0.212389	8.1895e-12	5.98261e-11
ENSGALG00000007652	SUCLG2	2059.15	1.29891	0.0983007	5.23331e-42	2.76388e-40
ENSGALG00000016558	VEGFD	14.3129	1.29838	0.787899	0.00129987	0.00353688
ENSGALG00000026600	C1orf198	162.539	1.29738	0.371826	5.55144e-06	2.14391e-05
ENSGALG00000030710		86.988	1.29672	0.347854	2.15428e-06	8.77177e-06
ENSGALG00000015101	BNC2	188.231	1.29571	0.238606	5.31494e-10	3.26393e-09
ENSGALG00000009292		123.682	1.29489	0.24707	1.5372e-09	8.99428e-09
ENSGALG00000000397	IPO9	4734.43	1.29408	0.0695514	2.01064e-79	4.5616e-77
ENSGALG00000004442	PPA1	3049.31	1.29345	0.0690405	1.816e-80	4.57065e-78
ENSGALG00000047320	MFAP5	206.022	1.29281	0.192028	1.46153e-13	1.243e-12
ENSGALG00000014863	TMEM267	271.737	1.29255	0.204993	2.58458e-12	1.9675e-11
ENSGALG00000047472		464.047	1.29245	0.138706	9.38429e-23	1.58784e-21
ENSGALG00000049065	ZFPM1	9856.17	1.29242	0.0573199	9.91878e-115	4.99286e-112
ENSGALG00000053889		1290.33	1.28862	0.09059	4.77068e-48	3.41538e-46
ENSGALG00000048077		275.138	1.28542	0.205332	3.56165e-12	2.68214e-11
ENSGALG00000002043		2020.42	1.28516	0.0847458	4.515e-54	4.22835e-52
ENSGALG00000053062		36.3988	1.2842	0.465222	7.54299e-05	0.000251506
ENSGALG00000049636		23.8234	1.28371	0.593266	0.000424066	0.00125245
ENSGALG00000040720	GRID2IP	31.236	1.27668	0.538032	0.00024616	0.000759462
ENSGALG00000051992	CYP2J23	112.232	1.27614	0.264056	1.43395e-08	7.63571e-08
ENSGALG00000054345	RFKL	744.342	1.27608	0.143275	4.5314e-21	6.89904e-20
ENSGALG00000012697	SLC41A2	401.593	1.27413	0.140191	8.6677e-22	1.38511e-20
ENSGALG00000035836	LDHB	12267.5	1.27243	0.0554729	1.50156e-118	8.34041e-116
ENSGALG00000010958	PPFIA2	4.61211	1.27125	1.48006	0.00166953	0.00444657
ENSGALG00000007009	NCOA5	1956.56	1.27071	0.0840558	9.99303e-54	9.3045e-52
ENSGALG00000019304		37.3754	1.26948	0.451929	6.73583e-05	0.000226184
ENSGALG00000002283	MAPKAPK3	432.707	1.26878	0.14649	4.18433e-20	5.96471e-19
ENSGALG00000009248	HSPA12A	199.766	1.26859	0.197868	1.41877e-12	1.10403e-11
ENSGALG00000028015	HES1	90.3045	1.26787	0.291047	1.51639e-07	7.14417e-07
ENSGALG00000017142	PSPC1	1630.29	1.26735	0.0777927	9.22174e-62	1.13392e-59
ENSGALG00000007819	PDZRN3	836.066	1.2672	0.12011	4.372e-28	1.04094e-26
ENSGALG00000015799	ELAVL2	648.817	1.2642	0.138002	4.65816e-22	7.5335e-21
ENSGALG00000017044	TRPC4	41.3323	1.26417	0.586759	0.000458499	0.00134674
ENSGALG00000016385	TSSC1	1055.16	1.263	0.123406	1.23189e-26	2.68153e-25
ENSGALG00000002514	SFPQ	11392.2	1.26099	0.0673015	2.07333e-80	5.13804e-78
ENSGALG00000023812	CCNI2	104.327	1.26069	0.322808	1.156e-06	4.89377e-06
ENSGALG00000030011	ZNF704	1235.55	1.25998	0.0854701	2.96606e-51	2.5146e-49
ENSGALG00000010309	ZC2HC1C	89.9141	1.25933	0.32622	1.40422e-06	5.87205e-06
ENSGALG00000054322		669.909	1.25856	0.181192	3.75875e-14	3.37492e-13
ENSGALG00000008952	NOXA1	4.77194	1.25532	1.479	0.00170479	0.00452997
ENSGALG00000012484	RIF1	4013.61	1.25498	0.0761316	4.12491e-63	5.27334e-61
ENSGALG00000048343		693.416	1.25292	0.105383	1.22598e-34	4.27447e-33
ENSGALG00000005420	AATF	892.809	1.24956	0.124126	7.3757e-26	1.50771e-24
ENSGALG00000042318		3.32636	1.24945	1.4059	0.00202758	0.00531579
ENSGALG00000015062		35.5513	1.24656	0.669208	0.000967725	0.00269271
ENSGALG00000006043	RBBP6	5844.98	1.24607	0.105109	1.91531e-34	6.59226e-33
ENSGALG00000004273	RALGPS2	704.195	1.24563	0.153406	4.75437e-18	5.77117e-17
ENSGALG00000011696	JAG2	958.9	1.24367	0.109653	7.83864e-32	2.38686e-30
ENSGALG00000026005	DIO2	5580.68	1.24351	0.0970108	1.22986e-39	5.77566e-38
ENSGALG00000015537	MAN2B2	1289.37	1.24084	0.100939	9.57748e-37	3.81866e-35
ENSGALG00000038461	FECH	437.152	1.2402	0.176931	2.59893e-14	2.35585e-13
ENSGALG00000047455		783.67	1.23908	0.126368	1.08173e-24	2.07188e-23
ENSGALG00000014213	PRR5	1622.2	1.23649	0.0725109	3.2189e-67	4.80093e-65
ENSGALG00000042521	MPP3	525.016	1.2363	0.197981	4.86337e-12	3.61843e-11
ENSGALG00000005011	SHC4	1219.14	1.23614	0.0943312	3.07347e-41	1.57667e-39
ENSGALG00000023546		573.918	1.2359	0.127852	4.31619e-24	7.93666e-23
ENSGALG00000005147	AMY1A	77.1568	1.23531	0.319298	1.47622e-06	6.16196e-06
ENSGALG00000003015	SERPINF1	16.7581	1.23336	0.744515	0.00153111	0.00410779
ENSGALG00000037686	NBN	526.426	1.23186	0.140079	1.55041e-20	2.27037e-19
ENSGALG00000012747	NEDD9	2904.2	1.22892	0.0996382	6.17135e-37	2.47284e-35
ENSGALG00000006041	BNC1	3982.14	1.22793	0.110689	1.42387e-30	3.98881e-29
ENSGALG00000040529	DLX3	24.0516	1.22634	0.704932	0.00132913	0.00360801
ENSGALG00000039863	DDX25	21.8924	1.2256	0.675087	0.0011382	0.00312763
ENSGALG00000036219	STK35	188.3	1.22445	0.207423	4.38445e-11	2.98372e-10
ENSGALG00000043632		477.128	1.22276	0.149327	3.02716e-18	3.72225e-17
ENSGALG00000008632	ACSS1	18.8669	1.22104	0.627731	0.000864712	0.00242746
ENSGALG00000014855	GHR	76.8457	1.22103	0.299069	6.22607e-07	2.72748e-06
ENSGALG00000005232	USP54	925.05	1.22062	0.163148	8.65848e-16	8.77727e-15
ENSGALG00000037520	CCDC89	13.9742	1.21831	0.839414	0.00225179	0.00585314
ENSGALG00000007669	EGR1	21371.3	1.21392	0.065063	1.20239e-79	2.80698e-77
ENSGALG00000002563	TPM4	4372.87	1.21245	0.100096	1.03261e-35	3.81496e-34
ENSGALG00000047879		966.817	1.21217	0.0990657	2.2839e-36	8.95112e-35
ENSGALG00000008840	ACSL5	4.50422	1.21126	1.44588	0.00194725	0.00512187
ENSGALG00000005236	FARSB	2270.82	1.21085	0.112456	5.7511e-29	1.4543e-27
ENSGALG00000007645		78.1634	1.21073	0.344149	6.63325e-06	2.53736e-05
ENSGALG00000016676	MCM3	5234.16	1.20788	0.103595	2.42038e-33	7.87625e-32
ENSGALG00000013356	IKBKE	267.364	1.20699	0.212657	1.86394e-10	1.19239e-09
ENSGALG00000050133		316.233	1.20657	0.156481	1.58185e-16	1.69983e-15
ENSGALG00000038710	MANSC1	492.175	1.20642	0.144772	9.81407e-19	1.25664e-17
ENSGALG00000015779	PM20D2	97.6015	1.206	0.254141	2.96118e-08	1.51907e-07
ENSGALG00000038433	SPON2	51.8558	1.20538	0.392249	3.43155e-05	0.000119515
ENSGALG00000036543	ZBTB38	270.653	1.20504	0.165025	3.64682e-15	3.50077e-14
ENSGALG00000003733	LIFR	536.289	1.20414	0.19869	1.82971e-11	1.30009e-10
ENSGALG00000013207	CTNNAL1	26.1337	1.20076	0.694415	0.00146264	0.00393917
ENSGALG00000021341	ADAM20	28.8763	1.20008	0.502711	0.000297173	0.000903359
ENSGALG00000003818	CYFIP2	7.01986	1.19971	1.23494	0.00292252	0.00744937
ENSGALG00000050112		8.24594	1.19809	0.990885	0.00309443	0.00784963
ENSGALG00000008439	CD36	22.2276	1.19741	0.676593	0.0013605	0.00368257
ENSGALG00000040672	IGFBP4	47.6441	1.19296	0.433158	0.00010237	0.000335702
ENSGALG00000007102	MLEC	7993.3	1.1919	0.0769232	4.81693e-56	4.94211e-54
ENSGALG00000015414	NSUN3	256.202	1.19096	0.206055	1.08797e-10	7.14721e-10
ENSGALG00000046125	PECAM1	447.961	1.19067	0.188752	4.04114e-12	3.02485e-11
ENSGALG00000016364	ALKAL2	16.1604	1.18939	0.761344	0.0020604	0.00539393
ENSGALG00000009995	AKAP6	484.172	1.18742	0.22089	1.14827e-09	6.82018e-09
ENSGALG00000010051	MOCS1	1309.03	1.18704	0.1076	3.61612e-30	9.83927e-29
ENSGALG00000050983		151.078	1.18525	0.312679	2.47999e-06	1.00119e-05
ENSGALG00000050372	SYCN	49.8567	1.18101	0.374971	2.87293e-05	0.000101263
ENSGALG00000028063	LOX	16474.1	1.1807	0.106822	2.98032e-30	8.17835e-29
ENSGALG00000039193	AGRN	2600.45	1.18007	0.0833189	2.1431e-47	1.51408e-45
ENSGALG00000054856		15.9891	1.17997	0.760814	0.00216013	0.00563214
ENSGALG00000043572	FAM89A	1018.71	1.17788	0.0999715	6.86193e-34	2.28845e-32
ENSGALG00000026607		993.979	1.17719	0.103351	6.70279e-32	2.04874e-30
ENSGALG00000054486	MC1R	16.0324	1.17713	0.875607	0.00292485	0.00745349
ENSGALG00000005332	CACNA1D	495.776	1.17562	0.159756	2.81121e-15	2.71155e-14
ENSGALG00000008538	GINS1	1865.43	1.17241	0.127128	4.37499e-22	7.10407e-21
ENSGALG00000011705	BRF1	867.096	1.17055	0.111705	1.62428e-27	3.73238e-26
ENSGALG00000039219	ADAMTS14	335.453	1.1697	0.177859	7.66225e-13	6.13132e-12
ENSGALG00000011464	EIF5	20150.7	1.16797	0.0487107	7.04143e-129	4.53693e-126
ENSGALG00000009202	RBM45	1202.71	1.16791	0.103694	3.0413e-31	8.92336e-30
ENSGALG00000005525	SRSF1	14858.9	1.16681	0.0579701	6.30704e-92	2.07334e-89
ENSGALG00000032974	ADAMTS2	1816.71	1.16648	0.100221	4.00301e-33	1.2974e-31
ENSGALG00000040272	ALG10	1615.59	1.16526	0.112069	3.9544e-27	8.85918e-26
ENSGALG00000042184	ALDH4A1	1953.48	1.16294	0.0778072	2.5483e-52	2.28045e-50
ENSGALG00000005583	ALG14	128.758	1.16214	0.241915	2.7082e-08	1.39488e-07
ENSGALG00000011549	ANKS1B	1074.88	1.161	0.116177	2.61357e-25	5.17191e-24
ENSGALG00000009639	DDX60	29.8871	1.15935	0.462457	0.000242111	0.000748258
ENSGALG00000008795	GPAM	120.632	1.15573	0.274627	4.72238e-07	2.10249e-06
ENSGALG00000006575	VIPR2	14.9064	1.15493	0.867383	0.00317772	0.00803684
ENSGALG00000014659	C1R	545.465	1.15317	0.128693	5.48798e-21	8.28495e-20
ENSGALG00000038043	HECTD2	592.545	1.15273	0.130942	2.26575e-20	3.29393e-19
ENSGALG00000015247	GPR161	135.296	1.15166	0.251976	8.9863e-08	4.37051e-07
ENSGALG00000052819		3.28145	1.1507	1.35712	0.00261243	0.00672435
ENSGALG00000007929	DIXDC1	152.865	1.15051	0.233736	1.57201e-08	8.33505e-08
ENSGALG00000032199	FGR	121.894	1.14948	0.282906	9.20022e-07	3.94141e-06
ENSGALG00000011008	MAP3K21	15.4845	1.14914	0.789802	0.00275883	0.00706505
ENSGALG00000019552	SERPINB10	1468.53	1.14828	0.116004	7.35014e-25	1.42132e-23
ENSGALG00000010000	PRKCE	835.953	1.14615	0.149815	3.59621e-16	3.74937e-15
ENSGALG00000033212	HSP90AA1	69479.1	1.14513	0.0844649	1.25645e-43	7.22818e-42
ENSGALG00000049578		183.271	1.14442	0.260551	2.15733e-07	9.98572e-07
ENSGALG00000053382		4.67973	1.14423	1.41749	0.0022553	0.00586131
ENSGALG00000044053	NLRX1	907.446	1.14369	0.11083	1.03314e-26	2.2642e-25
ENSGALG00000013754	PLAGL1	81.4899	1.14354	0.290077	1.58369e-06	6.58323e-06
ENSGALG00000047686		5.26319	1.14236	1.23765	0.00332165	0.00837196
ENSGALG00000045606		977.561	1.14062	0.15593	4.79757e-15	4.58359e-14
ENSGALG00000008182	CHAC2	263.099	1.13975	0.233321	2.01064e-08	1.05359e-07
ENSGALG00000054379	TSPAN32	60.9711	1.13824	0.338349	1.57829e-05	5.77141e-05
ENSGALG00000042103	C5H11ORF96	25.1062	1.13632	0.559141	0.000917359	0.00256053
ENSGALG00000051881		7.72304	1.13502	1.16178	0.00370259	0.00926251
ENSGALG00000050611		188.471	1.13479	0.175776	2.09431e-12	1.60644e-11
ENSGALG00000014674	CLSTN3	56.3504	1.13331	0.432164	0.000189427	0.000596187
ENSGALG00000010055	DAAM2	698.097	1.13067	0.151502	1.67159e-15	1.6519e-14
ENSGALG00000016896	ABCC4	2738.27	1.13057	0.13331	4.39986e-19	5.77141e-18
ENSGALG00000005217	MOGAT1	195.86	1.13043	0.201898	4.34659e-10	2.68565e-09
ENSGALG00000013535	CYP4V2	15.8796	1.12935	0.765478	0.00284827	0.00727905
ENSGALG00000052514		154.431	1.12913	0.217048	4.0217e-09	2.25805e-08
ENSGALG00000041365	SALL4	633.366	1.12798	0.171076	8.6964e-13	6.91761e-12
ENSGALG00000014818	TRIM45	2241.07	1.12772	0.0995497	1.88904e-31	5.61414e-30
ENSGALG00000007240	TRAIL-LIKE	26.0934	1.12616	0.522581	0.00070292	0.00200472
ENSGALG00000047280	CLDN20	31.4738	1.12448	0.482112	0.000445439	0.001311
ENSGALG00000000544		86.814	1.12324	0.299734	3.86849e-06	1.52322e-05
ENSGALG00000053167		182.896	1.12185	0.212981	2.93732e-09	1.67248e-08
ENSGALG00000011426	RNASET2	220.384	1.11923	0.227912	1.96084e-08	1.0285e-07
ENSGALG00000053940		68.6309	1.11915	0.405424	0.000131419	0.000423295
ENSGALG00000017153	RDX	6068.03	1.11817	0.135253	2.92065e-18	3.59402e-17
ENSGALG00000006045	SH3GL3	202.687	1.11808	0.187866	5.72643e-11	3.86432e-10
ENSGALG00000003326	AMACR	911.065	1.11784	0.109033	2.45496e-26	5.19638e-25
ENSGALG00000011543	SDAD1	2582.97	1.11753	0.106427	1.83095e-27	4.18339e-26
ENSGALG00000051422		88.1518	1.117	0.423223	0.00019153	0.0006021
ENSGALG00000010664	KIF26B	94.8066	1.11682	0.276233	1.16997e-06	4.95161e-06
ENSGALG00000051852		40.0892	1.11633	0.415265	0.000165754	0.000526375
ENSGALG00000009890	MRPS10	2010.99	1.11585	0.0881649	2.2163e-38	9.70112e-37
ENSGALG00000011630	GLI2	95.9004	1.11524	0.335966	2.04807e-05	7.36063e-05
ENSGALG00000013624		30.9005	1.1145	0.501623	0.000617619	0.00177717
ENSGALG00000001363	MYBBP1A	2325.09	1.11272	0.0973991	6.94211e-32	2.11787e-30
ENSGALG00000038850	WNK2	811.023	1.11144	0.100022	2.43182e-30	6.70749e-29
ENSGALG00000055056		100.8	1.11036	0.269004	8.37468e-07	3.60693e-06
ENSGALG00000050283		357.959	1.10916	0.158814	6.48833e-14	5.6832e-13
ENSGALG00000048031		209.832	1.10845	0.167518	8.34119e-13	6.6449e-12
ENSGALG00000051548		290.727	1.10833	0.18531	5.05797e-11	3.42615e-10
ENSGALG00000004956	GPI	23605.3	1.10662	0.0631987	2.73895e-70	4.54835e-68
ENSGALG00000001857	C1QTNF12	201.274	1.10624	0.249159	2.09284e-07	9.69554e-07
ENSGALG00000050049	C3orf70	12.9415	1.10616	0.925763	0.00418594	0.0103479
ENSGALG00000007989	ADNP	9868.27	1.10288	0.0760462	2.73644e-49	2.04068e-47
ENSGALG00000013403	MSANTD3	437.553	1.10246	0.139166	5.51269e-17	6.13673e-16
ENSGALG00000009807	FLVCR1	502.018	1.10173	0.138911	5.14114e-17	5.73104e-16
ENSGALG00000042067	SPRY1	4427	1.10142	0.0890714	9.52028e-37	3.80528e-35
ENSGALG00000023844		290.665	1.10067	0.139708	7.90859e-17	8.68974e-16
ENSGALG00000027947	GHSR	47.9358	1.10039	0.346103	3.58738e-05	0.000124699
ENSGALG00000007659	HYOU1	12298.2	1.10012	0.0524616	2.95983e-99	1.16285e-96
ENSGALG00000010104	DMAP1	398.232	1.09996	0.156539	5.06132e-14	4.47217e-13
ENSGALG00000012044	ANK2	254.093	1.09857	0.195002	4.25979e-10	2.63707e-09
ENSGALG00000009510	PIGH	311.24	1.09831	0.161934	2.85844e-13	2.37584e-12
ENSGALG00000002855	SARDH	24.1359	1.09799	0.678938	0.00249261	0.00643652
ENSGALG00000003789		15.6298	1.0978	0.627613	0.00194236	0.00510983
ENSGALG00000002060	TAF15	2673.94	1.09722	0.0861928	9.85745e-39	4.38629e-37
ENSGALG00000025672	SNORD97	120.513	1.09706	0.264044	7.94644e-07	3.43075e-06
ENSGALG00000044241		111.939	1.09684	0.258387	5.34119e-07	2.36103e-06
ENSGALG00000011098	TAF5L	2600.97	1.09582	0.0687064	7.10528e-59	8.00363e-57
ENSGALG00000002282	TMEM200A	39.7481	1.09546	0.513426	0.000825459	0.00232823
ENSGALG00000010208	CAPS2	4.20734	1.09438	1.37254	0.0026934	0.00691069
ENSGALG00000054759	B3GALNT1	472.622	1.09432	0.15501	4.13869e-14	3.69341e-13
ENSGALG00000007186	TMEM268	269.367	1.09278	0.17523	1.12028e-11	8.09574e-11
ENSGALG00000012795	RIOK1	1421.78	1.0907	0.11508	6.62202e-23	1.12756e-21
ENSGALG00000005958		48.3917	1.09008	0.445299	0.000368557	0.00110164
ENSGALG00000014692	LMNB1	1550.85	1.08952	0.0963295	3.00263e-31	8.82597e-30
ENSGALG00000008764	FAM171A1	271.843	1.08923	0.188403	1.88912e-10	1.20658e-09
ENSGALG00000001181	KCNJ5	9377.45	1.0877	0.0832848	1.45534e-40	7.14712e-39
ENSGALG00000036151	gga-mir-3538	7.74556	1.08738	1.13621	NA	NA
ENSGALG00000003805	PRKG1	485.235	1.0861	0.178033	2.74904e-11	1.92194e-10
ENSGALG00000026491	TMEM17	265	1.08571	0.18061	4.79488e-11	3.25478e-10
ENSGALG00000002555	RET	31.6001	1.08329	0.449053	0.000417353	0.00123511
ENSGALG00000031896	GSE1	3250.16	1.08315	0.0674457	1.32349e-59	1.54484e-57
ENSGALG00000001370	ADAMTS8	110.507	1.08263	0.276076	2.31022e-06	9.36413e-06
ENSGALG00000035783		34.8574	1.0826	0.496049	0.000765768	0.00217089
ENSGALG00000000162	DMB1	44.0261	1.08163	0.473416	0.000591231	0.00170734
ENSGALG00000036142	LOXL3	4807.57	1.08151	0.0727412	1.45229e-51	1.27139e-49
ENSGALG00000015316	C3H6ORF203	708.242	1.08091	0.132503	9.25398e-18	1.09044e-16
ENSGALG00000030730	NOL6	1494.12	1.08042	0.093223	1.27404e-32	4.03188e-31
ENSGALG00000041555	COL1A1	140142	1.08041	0.0776224	1.33764e-45	8.60155e-44
ENSGALG00000044788	ZNF628	995.077	1.07908	0.138392	1.73161e-16	1.85334e-15
ENSGALG00000026468	CHSY1	5415.36	1.07847	0.0892155	3.38083e-35	1.21288e-33
ENSGALG00000009170	NCEH1	103.179	1.07822	0.316563	1.7667e-05	6.41091e-05
ENSGALG00000054822		114.497	1.07709	0.261537	1.03132e-06	4.39137e-06
ENSGALG00000008007	ITGA11	32.6342	1.07657	0.430662	0.000335957	0.0010117
ENSGALG00000017229	FAT3	6.35986	1.07632	1.08702	0.00464096	0.0113595
ENSGALG00000038032	DUT	5955.24	1.07591	0.113418	6.73392e-23	1.14541e-21
ENSGALG00000041030	PCBP2	13986.3	1.07536	0.0616014	8.71875e-70	1.43308e-67
ENSGALG00000003295	ADAMTS12	907.988	1.07451	0.183114	1.22776e-10	8.02953e-10
ENSGALG00000010497	SLC29A4	215.435	1.0745	0.201508	2.68653e-09	1.53293e-08
ENSGALG00000017333	LCMT2	620.973	1.07214	0.159633	5.29714e-13	4.29207e-12
ENSGALG00000052818		119.25	1.07186	0.248375	4.42978e-07	1.97988e-06
ENSGALG00000030712	COL2A1	45.8002	1.07163	0.414756	0.000269588	0.000826203
ENSGALG00000047636		1753.19	1.06996	0.0908487	1.50362e-33	4.94293e-32
ENSGALG00000040447	CDCP1	4.33925	1.0666	1.36218	0.00285349	0.00728894
ENSGALG00000003285	CDHR2	24.8432	1.06583	0.519245	0.00111739	0.00307778
ENSGALG00000048570		335.091	1.06466	0.15081	4.98656e-14	4.41338e-13
ENSGALG00000005803	ZNRF3	288.665	1.06312	0.164205	2.85616e-12	2.16912e-11
ENSGALG00000043041	NRN1	4.22687	1.06022	1.35369	0.00294476	0.00749711
ENSGALG00000009519	ARG2	105.828	1.05992	0.2309	1.31745e-07	6.25263e-07
ENSGALG00000016908	PCDH9	288.49	1.05956	0.256587	1.07652e-06	4.56693e-06
ENSGALG00000003242	STAR	67.6396	1.05902	0.437145	0.000446363	0.00131324
ENSGALG00000046223	GPR21	45.7166	1.05889	0.398298	0.000228305	0.000708173
ENSGALG00000003154	TXNDC11	2518.18	1.05833	0.0628789	4.63196e-65	6.26989e-63
ENSGALG00000030451		825.05	1.05783	0.0898914	1.82804e-33	5.99715e-32
ENSGALG00000006119	SAXO2	38.7253	1.0575	0.450551	0.000550329	0.00159696
ENSGALG00000016811	SEPTIN10	134.905	1.05703	0.30233	1.39961e-05	5.14958e-05
ENSGALG00000028648	CCDC59	957.275	1.05605	0.0983293	2.13133e-28	5.18601e-27
ENSGALG00000005046	SHMT1	1125.53	1.05603	0.102521	2.25352e-26	4.79521e-25
ENSGALG00000010935	PTPRQ	9760.28	1.05601	0.0511668	4.04123e-96	1.47946e-93
ENSGALG00000034030	L3MBTL3	532.438	1.05552	0.132407	4.98517e-17	5.57647e-16
ENSGALG00000054542		849.806	1.05518	0.102204	1.77327e-26	3.8238e-25
ENSGALG00000040971	EGR2	406.778	1.05332	0.203908	7.48082e-09	4.08201e-08
ENSGALG00000049164		771.203	1.05329	0.170425	2.02999e-11	1.43732e-10
ENSGALG00000049446	SLC29A3	553.876	1.05284	0.129412	1.33195e-17	1.55697e-16
ENSGALG00000013971	SGK1	5478.4	1.05091	0.0686955	2.6582e-54	2.51872e-52
ENSGALG00000008728	PTER	233.373	1.05035	0.175849	7.50271e-11	5.01259e-10
ENSGALG00000012987	CCDC77	1983.35	1.04928	0.097303	1.38869e-28	3.42557e-27
ENSGALG00000031835	TMEM68	795.415	1.0488	0.146707	2.8895e-14	2.6119e-13
ENSGALG00000038747	TM4SF18	55.3968	1.04725	0.37778	0.000170608	0.000540442
ENSGALG00000034140	ZNF395	679.735	1.0472	0.138263	1.21363e-15	1.2165e-14
ENSGALG00000004489		134.073	1.04644	0.266969	2.79801e-06	1.12004e-05
ENSGALG00000008092	NXT2	2397.22	1.04642	0.0775052	5.33034e-43	2.98129e-41
ENSGALG00000050831		453.872	1.04465	0.146902	3.89889e-14	3.49685e-13
ENSGALG00000017627	C10orf2	2828.35	1.04046	0.0902831	3.56988e-32	1.10584e-30
ENSGALG00000000975	C1orf174	525.224	1.04	0.115934	1.04753e-20	1.55232e-19
ENSGALG00000017050	SMAD9	220.541	1.03925	0.214677	4.34077e-08	2.18983e-07
ENSGALG00000008656	ICOS	907.41	1.03919	0.0894738	1.26106e-32	4.00654e-31
ENSGALG00000001501	MAPK3	6333.99	1.03789	0.0906843	9.08676e-32	2.74615e-30
ENSGALG00000009730	SLC38A4	6.78389	1.03588	1.09281	0.0051865	0.0125952
ENSGALG00000054797		14.5597	1.03532	0.666191	0.0034386	0.00863968
ENSGALG00000052083		22.3973	1.03468	0.703721	0.00393083	0.0097758
ENSGALG00000032219	FUS	19336.9	1.03431	0.070629	5.53133e-50	4.28359e-48
ENSGALG00000007905	LAMB1	135.03	1.03421	0.242637	6.87779e-07	2.99669e-06
ENSGALG00000040141	H2AFY	1613.03	1.03389	0.0787256	8.06037e-41	4.05739e-39
ENSGALG00000030613	PDGFRB	398.132	1.03376	0.157091	1.68686e-12	1.30134e-11
ENSGALG00000013956	MYB	777.957	1.03366	0.128726	3.58239e-17	4.05803e-16
ENSGALG00000040070	PDIA2	68.0201	1.03346	0.426385	0.00049362	0.0014441
ENSGALG00000042265		65.3453	1.03341	0.393841	0.000281533	0.000860029
ENSGALG00000011809	GRIN2B	4.20409	1.0312	1.33731	0.00318096	0.00804378
ENSGALG00000049807		131.218	1.03	0.210779	3.63808e-08	1.84923e-07
ENSGALG00000014234	ATXN10	482.871	1.02964	0.167516	2.90226e-11	2.02117e-10
ENSGALG00000003695	MINPP1	312.728	1.02948	0.20763	2.53537e-08	1.31107e-07
ENSGALG00000049663		883.157	1.02923	0.158848	3.40561e-12	2.56824e-11
ENSGALG00000022926	GPR162	13.7489	1.02919	0.959908	0.00568305	0.0136958
ENSGALG00000048379		1956.75	1.02902	0.118456	1.41829e-19	1.92629e-18
ENSGALG00000038160	POLR1A	2145.88	1.02843	0.115896	2.70877e-20	3.91677e-19
ENSGALG00000028183		3.19947	1.02736	1.28925	0.00367264	0.00919474
ENSGALG00000040267	IVD	494.269	1.02568	0.122993	2.89891e-18	3.57001e-17
ENSGALG00000015367	NECTIN3	155.971	1.02448	0.230067	3.05669e-07	1.38528e-06
ENSGALG00000029484	RIC8B	1121	1.02448	0.109298	2.77482e-22	4.57023e-21
ENSGALG00000004813	IARS1	7255.84	1.02329	0.0659064	9.38179e-56	9.50452e-54
ENSGALG00000033834	TRIP13	1246.93	1.02327	0.094111	6.22363e-29	1.56641e-27
ENSGALG00000014901	METTL16	938.096	1.02259	0.087838	1.02369e-32	3.25881e-31
ENSGALG00000035065	FAM110B	674.789	1.02217	0.160097	6.61889e-12	4.8795e-11
ENSGALG00000049334		43.692	1.02059	0.501365	0.0013789	0.00372799
ENSGALG00000002546	COL5A1	26379.2	1.02018	0.0735098	3.56309e-45	2.22459e-43
ENSGALG00000009638	ANO6	131.53	1.01982	0.234743	5.15186e-07	2.2815e-06
ENSGALG00000051176		28.8892	1.01946	0.557307	0.00217563	0.0056689
ENSGALG00000029324		172.522	1.01925	0.218182	1.11937e-07	5.36629e-07
ENSGALG00000048144		800.248	1.01819	0.131929	4.78364e-16	4.93941e-15
ENSGALG00000003129	RAB11FIP1	11.7381	1.01815	0.853898	0.00567372	0.0136794
ENSGALG00000050853		16.2413	1.01815	0.851386	0.00566074	0.0136536
ENSGALG00000005294	PPFIBP2	38.8533	1.01769	0.42162	0.000541685	0.00157414
ENSGALG00000051564		585.151	1.01754	0.1229	5.05392e-18	6.11176e-17
ENSGALG00000013948	RASL11B	168.026	1.01703	0.180508	6.8678e-10	4.17144e-09
ENSGALG00000042062	HMX1	116.821	1.01698	0.241653	9.58561e-07	4.09345e-06
ENSGALG00000050627		287.153	1.01609	0.180838	7.55212e-10	4.56642e-09
ENSGALG00000033034	SLC25A34	11.5878	1.01583	0.829826	0.00559276	0.0135105
ENSGALG00000001331	ST14	2852.48	1.01577	0.0765279	1.41225e-41	7.33821e-40
ENSGALG00000012988	B4GALNT3	94.8117	1.01548	0.277289	9.18624e-06	3.45641e-05
ENSGALG00000009085	MTMR1	2958.83	1.01537	0.0849385	2.6256e-34	8.94149e-33
ENSGALG00000026757	DHFR	693.802	1.01516	0.119088	6.38157e-19	8.28987e-18
ENSGALG00000014568	EMG1	537.996	1.01515	0.137896	7.43736e-15	7.0347e-14
ENSGALG00000051551		206.743	1.01322	0.226942	3.08288e-07	1.39648e-06
ENSGALG00000025929	HOXA5	423.143	1.01319	0.240355	9.49204e-07	4.05457e-06
ENSGALG00000016917	CLN5	100.545	1.01238	0.260162	3.75957e-06	1.4832e-05
ENSGALG00000012592	RMI1	731.651	1.01117	0.134133	2.00123e-15	1.96766e-14
ENSGALG00000025796	ADI1	1082.85	1.01092	0.114333	4.03572e-20	5.76818e-19
ENSGALG00000021128	FSCN1	1718.12	1.01059	0.094566	5.128e-28	1.21473e-26
ENSGALG00000049278		45.4063	1.00937	0.437739	0.00074519	0.00211665
ENSGALG00000007389	ANKRD40	528.963	1.00928	0.109791	1.66519e-21	2.60923e-20
ENSGALG00000016329	AGPAT5	2941.82	1.0091	0.0976902	2.27376e-26	4.83188e-25
ENSGALG00000047969		35.9632	1.00869	0.506023	0.00159037	0.00425332
ENSGALG00000050414		4.13213	1.00832	1.32073	0.00342074	0.00860286
ENSGALG00000001718	CCNG1	1079.83	1.00784	0.103053	6.06534e-24	1.10646e-22
ENSGALG00000010818	PLPP3	5282.76	1.00761	0.0583268	3.28618e-68	5.08979e-66
ENSGALG00000004959	IRS1	1701.37	1.00713	0.0849453	8.96809e-34	2.96021e-32
ENSGALG00000037136	RPS6KA1	956.866	1.00686	0.091384	1.40262e-29	3.66776e-28
ENSGALG00000037709	SDF2	1569.58	1.00605	0.0879904	1.28009e-31	3.83266e-30
ENSGALG00000040051		126.548	1.00525	0.302107	3.33739e-05	0.000116462
ENSGALG00000054378	LRRC43	36.0014	1.0049	0.440227	0.000805686	0.00227405
ENSGALG00000004628	CTNS	618.25	1.00465	0.114772	9.22065e-20	1.27272e-18
ENSGALG00000008164	ADAMTS7	101.29	1.00366	0.241498	1.29576e-06	5.44962e-06
ENSGALG00000004081	TMCO4	414.261	1.00321	0.17391	3.40475e-10	2.1282e-09
ENSGALG00000017822	SNORD16	49.5644	1.0032	0.393373	0.000396378	0.00117889
ENSGALG00000026028	SREK1IP1	456.255	1.00242	0.136572	9.48134e-15	8.88972e-14
ENSGALG00000038087	CACNG3	35.8474	1.00162	0.611404	0.00335861	0.00845919
ENSGALG00000047947		2756.24	1.00065	0.0761005	8.10595e-41	4.06762e-39
ENSGALG00000009968	OTUD4	2352.75	1.00001	0.0784008	1.37919e-38	6.1033e-37
ENSGALG00000026225	PSMD12	7194.62	0.999807	0.0620738	1.09158e-59	1.28344e-57
ENSGALG00000031832	IKBKB	3544.62	0.99908	0.0836807	3.49837e-34	1.18138e-32
ENSGALG00000009815	TMEM5	201.795	0.997376	0.234206	8.56111e-07	3.68329e-06
ENSGALG00000005535	TCOF1	4216.42	0.997284	0.0713639	1.07435e-45	7.02344e-44
ENSGALG00000021158	SLC7A9	9.47713	0.997203	0.890319	0.00634067	0.0151401
ENSGALG00000003096	CBFA2T2	35.7572	0.995143	0.534559	0.00223104	0.00580201
ENSGALG00000014984	F2RL1	22302.7	0.994993	0.0501831	8.58546e-89	2.76589e-86
ENSGALG00000040254	UQCC1	1725.21	0.994637	0.0727611	7.53289e-44	4.36474e-42
ENSGALG00000048543	RPP14	6.19602	0.994604	1.11242	0.00565255	0.0136366
ENSGALG00000011922	PCNX4	288.445	0.99396	0.179266	1.31646e-09	7.76761e-09
ENSGALG00000009616	SPATA17	363.174	0.993653	0.13739	2.21822e-14	2.01985e-13
ENSGALG00000031209	GINS3	2033.01	0.993039	0.0805537	3.16784e-36	1.22958e-34
ENSGALG00000049806		27.6932	0.991994	0.592377	0.00325961	0.00822459
ENSGALG00000026385	LYPLAL1	561.479	0.991226	0.137187	2.37003e-14	2.15321e-13
ENSGALG00000006966	ZNF518A	566.314	0.990641	0.170085	2.63597e-10	1.6612e-09
ENSGALG00000004506	URI1	4782.34	0.990239	0.0599846	1.62806e-62	2.04881e-60
ENSGALG00000010561	GPATCH11	3518.56	0.988401	0.0797337	1.39045e-36	5.48955e-35
ENSGALG00000052242		148.693	0.988274	0.246634	2.65449e-06	1.06577e-05
ENSGALG00000007431	MAGI1	763.152	0.988129	0.11016	1.47137e-20	2.15855e-19
ENSGALG00000011111	PGBD5	408.389	0.986612	0.140267	9.76838e-14	8.41439e-13
ENSGALG00000040444	SEMA3C	6017.79	0.986526	0.184767	4.32486e-09	2.41892e-08
ENSGALG00000042534	NFATC1	503.185	0.985904	0.144308	4.07152e-13	3.33931e-12
ENSGALG00000011524	PPEF2	43.6969	0.985689	0.356975	0.000232901	0.000721871
ENSGALG00000005979	OXSR1	7737.47	0.984082	0.0944659	1.06631e-26	2.33372e-25
ENSGALG00000011855	RHOJ	441.315	0.983919	0.169936	3.36701e-10	2.10707e-09
ENSGALG00000028354	METRNL	484.577	0.983344	0.150662	3.29214e-12	2.485e-11
ENSGALG00000005188	MINDY4	189.468	0.982331	0.17826	1.70917e-09	9.95345e-09
ENSGALG00000013430		812.81	0.982191	0.134357	1.33853e-14	1.237e-13
ENSGALG00000051964		43.7124	0.982159	0.445561	0.00107826	0.00297713
ENSGALG00000009686	PPP1R9A	251.285	0.981271	0.203637	6.75729e-08	3.32762e-07
ENSGALG00000012013	SLC25A17	1612.25	0.980169	0.0910963	2.82797e-28	6.8193e-27
ENSGALG00000053648	TSSK3	38.9611	0.980098	0.447595	0.00112723	0.00310056
ENSGALG00000012965	FAM105A	965.852	0.979455	0.0985912	1.55852e-24	2.95696e-23
ENSGALG00000012178	PDGFB	654.456	0.979318	0.118776	8.56996e-18	1.01355e-16
ENSGALG00000041417	ACADSB	1624.61	0.97874	0.0963303	1.58821e-25	3.19786e-24
ENSGALG00000002579	RIMBP2	105.081	0.978625	0.299872	4.77354e-05	0.0001636
ENSGALG00000039741	TNFRSF8	48.1465	0.978201	0.422699	0.000832933	0.00234684
ENSGALG00000017205	ENDOD1	442.345	0.977815	0.197547	3.56526e-08	1.81393e-07
ENSGALG00000019873	RDH14	902.423	0.977784	0.125911	4.22534e-16	4.37978e-15
ENSGALG00000031340	E2F7	876.601	0.977257	0.126146	4.90749e-16	5.06081e-15
ENSGALG00000000154	DENND2D	74.7905	0.976573	0.300232	5.0059e-05	0.000170909
ENSGALG00000049882	SMPDL3A	1643.39	0.975988	0.0893326	4.75289e-29	1.20566e-27
ENSGALG00000031303	FAM234A	1306.02	0.9752	0.123412	1.45388e-16	1.56859e-15
ENSGALG00000016810	SH3RF3	1216.54	0.973582	0.121158	4.99188e-17	5.58009e-16
ENSGALG00000039336	OTX5	289.157	0.972315	0.242493	2.86401e-06	1.1439e-05
ENSGALG00000010669	TDP1	1102.84	0.972081	0.113031	4.34368e-19	5.70236e-18
ENSGALG00000039155	ZHX3	858.007	0.971945	0.105517	1.77347e-21	2.77351e-20
ENSGALG00000040833		4794.78	0.971823	0.0998554	1.21571e-23	2.1807e-22
ENSGALG00000035869	ATAD3A	3511.4	0.970631	0.0721251	1.58658e-42	8.63398e-41
ENSGALG00000046461	LRRC15	1298.03	0.970344	0.115563	2.52561e-18	3.11983e-17
ENSGALG00000031794		44.844	0.970286	0.401378	0.000659255	0.00188955
ENSGALG00000010668	WWC2	1578.03	0.969894	0.0972985	1.17907e-24	2.25296e-23
ENSGALG00000052511		1601.64	0.969837	0.0706456	3.95344e-44	2.33267e-42
ENSGALG00000015196	ASXL3	242.916	0.969762	0.206376	1.29809e-07	6.16802e-07
ENSGALG00000011690	CLBA1	209.034	0.969491	0.200491	6.64746e-08	3.27654e-07
ENSGALG00000007332	PRICKLE2	272.46	0.96903	0.145393	1.41986e-12	1.10435e-11
ENSGALG00000022733	ARL11	499.761	0.968884	0.135411	4.5366e-14	4.03235e-13
ENSGALG00000000776	BRPF3	638.967	0.968595	0.187016	1.13916e-08	6.11655e-08
ENSGALG00000010601	UFSP2	1940.96	0.968258	0.101042	5.34321e-23	9.15622e-22
ENSGALG00000038089	EGFR	11732.3	0.967678	0.0764293	5.63201e-38	2.36868e-36
ENSGALG00000015916	SLC17A5	701.279	0.967654	0.156213	3.12008e-11	2.16258e-10
ENSGALG00000043103	PKNOX2	1172.63	0.967119	0.136736	8.30906e-14	7.20357e-13
ENSGALG00000052712		2590.5	0.96612	0.111645	2.82812e-19	3.77426e-18
ENSGALG00000006158	ACVR2B	81.1711	0.966078	0.282161	2.88929e-05	0.000101773
ENSGALG00000002699	VAV2	7056.18	0.965824	0.0756733	1.54658e-38	6.80665e-37
ENSGALG00000000400	KCNC4	2.83393	0.965311	1.23546	0.00462867	0.0113311
ENSGALG00000018702		37.2179	0.964808	0.4655	0.00158608	0.00424325
ENSGALG00000004494	CCNE1	173.799	0.964556	0.204682	1.25268e-07	5.96283e-07
ENSGALG00000010768	PIGM	273.55	0.96398	0.224199	8.5848e-07	3.69151e-06
ENSGALG00000030075		2.88762	0.963388	1.23725	0.00461792	0.0113099
ENSGALG00000052756		71.642	0.962919	0.267751	1.55521e-05	5.69219e-05
ENSGALG00000006494	GRAMD1B	698.214	0.962319	0.121896	1.66918e-16	1.79128e-15
ENSGALG00000004528	TSHZ3	574.231	0.961787	0.122487	2.34913e-16	2.49274e-15
ENSGALG00000004722	ASPN	25.354	0.960904	0.506422	0.00237066	0.00613736
ENSGALG00000033106	TMTC3	2759.07	0.960767	0.0746592	4.08988e-39	1.87159e-37
ENSGALG00000039474	ID4	9155.05	0.960264	0.101016	1.17442e-22	1.97882e-21
ENSGALG00000048248		17.8981	0.959583	0.583517	0.00389364	0.0096908
ENSGALG00000046970		9.61955	0.958996	0.728799	0.00631158	0.0150818
ENSGALG00000006512	HSPA8	110374	0.956681	0.0615914	1.30692e-55	1.30757e-53
ENSGALG00000015808	SLC35A1	857.233	0.9566	0.115002	5.3374e-18	6.43525e-17
ENSGALG00000051989		112.249	0.954595	0.322542	0.000147114	0.000471022
ENSGALG00000034218		10449.8	0.954313	0.0680623	7.32583e-46	4.81651e-44
ENSGALG00000042123	CLDN23	17.441	0.953315	0.805571	0.00724397	0.0170369
ENSGALG00000009801	C5H15orf41	987.37	0.953064	0.15145	1.81708e-11	1.29168e-10
ENSGALG00000017135	CRYL1	2219.49	0.952096	0.0820639	2.55667e-32	7.95035e-31
ENSGALG00000030270	CD1C	51.2008	0.952	0.434339	0.00126523	0.00345194
ENSGALG00000053622		4.80923	0.950272	1.13759	0.00600814	0.014406
ENSGALG00000036240	AKAP12	535.676	0.949781	0.180524	8.18413e-09	4.44621e-08
ENSGALG00000039385		22.6509	0.948379	0.52377	0.00297828	0.00757167
ENSGALG00000002937	PSME3	4813.07	0.94824	0.0614389	6.39478e-55	6.20525e-53
ENSGALG00000004660		51.7656	0.945387	0.393949	0.000772905	0.00219035
ENSGALG00000049343		823.642	0.945288	0.152883	3.82402e-11	2.62787e-10
ENSGALG00000040436	GAD2	2.90982	0.944823	1.22807	0.00486047	0.0118661
ENSGALG00000004079	ENOX2	2505.23	0.944659	0.0879935	4.56922e-28	1.08556e-26
ENSGALG00000006385	UBXN7	469.051	0.944261	0.186827	2.52662e-08	1.30738e-07
ENSGALG00000014725	PLK2	23211.2	0.94358	0.0608866	2.45526e-55	2.44131e-53
ENSGALG00000028141	C15orf61	1065.48	0.943457	0.0978909	3.63764e-23	6.30532e-22
ENSGALG00000009732	PCDH18	145.958	0.942264	0.250751	9.33816e-06	3.50382e-05
ENSGALG00000013814	IMPA2	268.086	0.942045	0.168498	1.37058e-09	8.06918e-09
ENSGALG00000011688	TCP11L1	894.594	0.94154	0.0953982	3.759e-24	6.94381e-23
ENSGALG00000013095	DERA	880.517	0.941524	0.130816	3.92758e-14	3.52061e-13
ENSGALG00000007447	TUBB1	313.148	0.938436	0.13536	2.66771e-13	2.22535e-12
ENSGALG00000007748	SLC16A2	89.0428	0.938391	0.294135	7.52488e-05	0.000251058
ENSGALG00000014391	CCDC149	261.012	0.937919	0.223982	1.62382e-06	6.73442e-06
ENSGALG00000010806	RIN3	36.2856	0.937887	0.432004	0.00141493	0.00381961
ENSGALG00000014723	GABARAPL1	3871.27	0.937755	0.0842936	6.54226e-30	1.75247e-28
ENSGALG00000048563		1515.21	0.936821	0.117332	9.43454e-17	1.03242e-15
ENSGALG00000008663	DDAH1	1070.65	0.936795	0.160554	3.39993e-10	2.12601e-09
ENSGALG00000032743	C1orf112	502.37	0.936339	0.150681	3.31218e-11	2.28883e-10
ENSGALG00000007961	ARMC7	344.114	0.935481	0.214105	7.36354e-07	3.19536e-06
ENSGALG00000035498	INPP5D	20.2619	0.935294	0.673145	0.00632874	0.0151161
ENSGALG00000006794		1320.59	0.934963	0.111895	4.42087e-18	5.38256e-17
ENSGALG00000016930	DIS3	2211.85	0.933628	0.0838149	5.71105e-30	1.53579e-28
ENSGALG00000016356	TDRP	89.8873	0.932735	0.277908	4.3751e-05	0.00015065
ENSGALG00000012530	FOXRED2	1104.86	0.93227	0.111365	3.93497e-18	4.81279e-17
ENSGALG00000039391	ZC3H12B	145.874	0.932076	0.237479	5.06005e-06	1.9664e-05
ENSGALG00000010835	DTX4	19197.1	0.931316	0.0627901	6.61111e-51	5.51771e-49
ENSGALG00000028721	LMOD1	4638.02	0.930868	0.106599	1.74498e-19	2.36203e-18
ENSGALG00000020534	AK6	730.373	0.930531	0.116581	9.99325e-17	1.08985e-15
ENSGALG00000051559		298.708	0.930207	0.139024	1.49461e-12	1.15857e-11
ENSGALG00000051250		9.88522	0.929891	0.867792	0.00828281	0.0192629
ENSGALG00000001603	NARF	1441.41	0.929357	0.105965	1.25803e-19	1.71731e-18
ENSGALG00000036504	C14orf39	48.7511	0.92896	0.408586	0.00114824	0.00315253
ENSGALG00000014859	ZNF131	313.537	0.928034	0.187553	4.77618e-08	2.39448e-07
ENSGALG00000038637	SHF	457.372	0.927926	0.187121	4.52215e-08	2.2735e-07
ENSGALG00000016281	DMD	7.507	0.92767	1.01446	0.0077351	0.018089
ENSGALG00000051654	YLPM1	3104.12	0.92767	0.0747606	1.73149e-36	6.81928e-35
ENSGALG00000026865	XRCC2	157.902	0.92744	0.262792	2.41145e-05	8.57665e-05
ENSGALG00000050651		120.192	0.927327	0.245762	9.52431e-06	3.56619e-05
ENSGALG00000006037	MCM2	7779.53	0.926269	0.0895106	3.125e-26	6.57147e-25
ENSGALG00000033068	TLR21	429.625	0.924982	0.181489	2.25941e-08	1.17629e-07
ENSGALG00000015124	KCTD1	252.167	0.924444	0.194001	1.21467e-07	5.79904e-07
ENSGALG00000030930		356.089	0.923244	0.150114	5.33637e-11	3.61017e-10
ENSGALG00000004878		257.417	0.922753	0.181657	2.50009e-08	1.2949e-07
ENSGALG00000050961		22.4709	0.922738	0.664178	0.00664593	0.0157965
ENSGALG00000026055	PALM	112.087	0.922405	0.260475	2.36898e-05	8.44236e-05
ENSGALG00000050026		16.234	0.922022	0.670781	0.00678899	0.0160961
ENSGALG00000021285	UNG	2154.34	0.921924	0.082295	2.99168e-30	8.19559e-29
ENSGALG00000040947	CREG2	108.282	0.921881	0.240131	7.55911e-06	2.8765e-05
ENSGALG00000010485	ALKBH1	690.036	0.921648	0.10711	5.63884e-19	7.35469e-18
ENSGALG00000002804	RND2	9.56646	0.92129	0.843512	0.00853996	0.0197902
ENSGALG00000009813	SCOC	5656.39	0.920032	0.0771779	7.07405e-34	2.35431e-32
ENSGALG00000013605	CARMIL1	4634.66	0.919985	0.0792939	3.07909e-32	9.55646e-31
ENSGALG00000037807		3451.4	0.919719	0.0708603	1.2406e-39	5.80917e-38
ENSGALG00000011096	ABCB10	289.797	0.918719	0.164776	1.7082e-09	9.95142e-09
ENSGALG00000026902	P2RX6	3.66964	0.91869	1.24916	0.00468467	0.0114647
ENSGALG00000010884	DDX24	2872.87	0.918452	0.0700852	2.41155e-40	1.15956e-38
ENSGALG00000011145	TRIL	1394.69	0.918341	0.162509	1.11023e-09	6.60157e-09
ENSGALG00000032841		177.806	0.91831	0.258962	2.37775e-05	8.46613e-05
ENSGALG00000038797	MANBAL4	1960.43	0.91649	0.074617	8.82712e-36	3.2762e-34
ENSGALG00000011816	ENGASE	588.688	0.916135	0.150264	7.75826e-11	5.16832e-10
ENSGALG00000039032	FJX1	174.535	0.916128	0.334822	0.000350732	0.00105207
ENSGALG00000012915	MCM4	10307.1	0.915137	0.0710981	5.17459e-39	2.34135e-37
ENSGALG00000009260	TMEM62	575.38	0.913423	0.133705	6.25466e-13	5.04255e-12
ENSGALG00000051044		1082.22	0.912852	0.12068	2.9681e-15	2.86117e-14
ENSGALG00000054757		68.7627	0.911341	0.427494	0.00174633	0.00462967
ENSGALG00000007565	PPP2R2B	75.7192	0.910767	0.330965	0.000344043	0.00103373
ENSGALG00000006817	CTNNBL1	3173.74	0.91041	0.0623129	1.98351e-49	1.49301e-47
ENSGALG00000047359	MAF1	3432.99	0.909491	0.0939205	2.8344e-23	4.96806e-22
ENSGALG00000002407	HYDIN	25.0025	0.909298	0.524078	0.00404503	0.0100366
ENSGALG00000033828	PYCR3	614.632	0.908848	0.114427	1.55241e-16	1.67042e-15
ENSGALG00000006838		442.863	0.907943	0.134642	1.18601e-12	9.31008e-12
ENSGALG00000011721		46.571	0.907879	0.420242	0.00165985	0.00442297
ENSGALG00000000638	UTP4	1738.35	0.907108	0.0912789	2.32093e-24	4.35222e-23
ENSGALG00000046903		62.446	0.905223	0.315545	0.000249583	0.000769186
ENSGALG00000004192	SLTM	1594.29	0.904963	0.112333	6.32597e-17	7.00335e-16
ENSGALG00000053351		20.2691	0.903838	0.645368	0.00705865	0.0166692
ENSGALG00000012020	KIAA1549L	19.7462	0.90365	0.575061	0.00550352	0.0133229
ENSGALG00000025868	TAF1C	776.742	0.903091	0.103593	2.32834e-19	3.13324e-18
ENSGALG00000011831	ANKRD50	1018.43	0.901451	0.13853	6.04e-12	4.4609e-11
ENSGALG00000046794		52.7539	0.900676	0.328815	0.000375433	0.00112094
ENSGALG00000036284	RPGR	198.926	0.900249	0.218272	2.61748e-06	1.05196e-05
ENSGALG00000045335		3.29292	0.900231	1.13341	0.00672082	0.0159509
ENSGALG00000032365	CEBPG	1314.2	0.899791	0.0875372	7.4573e-26	1.52053e-24
ENSGALG00000007685	BCL9L	4661.26	0.898602	0.106261	2.3053e-18	2.85864e-17
ENSGALG00000039322	DDR2	5938.01	0.89699	0.0605542	1.06947e-50	8.7447e-49
ENSGALG00000020775		639.472	0.89645	0.118165	2.74335e-15	2.65245e-14
ENSGALG00000002646	FAM171B	354.145	0.896282	0.190757	1.96294e-07	9.11072e-07
ENSGALG00000000533	SRSF3	10247.7	0.895347	0.0524397	2.09019e-66	3.0608e-64
ENSGALG00000023415	HMX3	79.6798	0.893576	0.279158	9.16006e-05	0.000302233
ENSGALG00000022887	KBTBD11	3.64169	0.893373	1.23213	0.00507849	0.0123534
ENSGALG00000050269		1051.57	0.892437	0.113392	3.03183e-16	3.18155e-15
ENSGALG00000017185	TMEM123	3036.22	0.892348	0.0736351	7.56949e-35	2.66221e-33
ENSGALG00000014954	ZNF518B	1236.56	0.891919	0.0896506	2.25902e-24	4.24601e-23
ENSGALG00000002789	MAP2	2.70193	0.891503	1.18622	0.00590841	0.01419
ENSGALG00000009896	TRERF1	2593.19	0.891002	0.0771061	6.24162e-32	1.91141e-30
ENSGALG00000037666		22.5591	0.890716	0.615423	0.00698975	0.016521
ENSGALG00000048158		140.484	0.890346	0.242563	1.72861e-05	6.27977e-05
ENSGALG00000050729		14.8738	0.890267	0.591474	0.00644333	0.0153671
ENSGALG00000004348	BRAT1	737.894	0.889453	0.112552	2.38298e-16	2.52699e-15
ENSGALG00000003206	EEF1AKNMT	538.021	0.889387	0.148982	1.96773e-10	1.2548e-09
ENSGALG00000041433	MSL3	483.419	0.88884	0.147012	1.23635e-10	8.07915e-10
ENSGALG00000042308	FZD3	1497.9	0.88841	0.0898598	4.29136e-24	7.90003e-23
ENSGALG00000035345	TXNRD1	803.461	0.887928	0.130352	8.26959e-13	6.59438e-12
ENSGALG00000036798	COL4A1	7.77045	0.88768	0.869311	0.00981681	0.0224615
ENSGALG00000032178	MAP2K4	1612.43	0.887366	0.0798164	9.44537e-30	2.4942e-28
ENSGALG00000006376	TMC3	996.42	0.887268	0.118072	4.99776e-15	4.76637e-14
ENSGALG00000031116	SNORD57	13.9162	0.886471	0.640037	0.00771999	0.0180589
ENSGALG00000003985	TARSL2	1840.09	0.886448	0.0777638	3.89428e-31	1.13229e-29
ENSGALG00000001110		885.48	0.885657	0.102658	5.66407e-19	7.38163e-18
ENSGALG00000049402		8.04452	0.884382	0.958549	0.00941672	0.0216229
ENSGALG00000034688	TIMELESS	2388.58	0.883972	0.125775	1.8437e-13	1.55504e-12
ENSGALG00000053632		106.507	0.883453	0.256829	4.21384e-05	0.000145346
ENSGALG00000049360	PPP1R10	1322.07	0.882951	0.100385	1.3034e-19	1.77775e-18
ENSGALG00000006776	KLHDC8B	261.372	0.881934	0.210247	2.1357e-06	8.69831e-06
ENSGALG00000038957	NAE1	1070.67	0.881844	0.106568	1.17596e-17	1.37964e-16
ENSGALG00000029674		1826.04	0.88169	0.090622	2.11111e-23	3.72461e-22
ENSGALG00000041331	RRP12	4524.4	0.881482	0.0636835	1.373e-44	8.22168e-43
ENSGALG00000035016	ID2	4527.38	0.881299	0.0886687	2.63464e-24	4.92901e-23
ENSGALG00000023379	F2RL2	1265.57	0.879843	0.0881159	1.67515e-24	3.17404e-23
ENSGALG00000011101	URB2	1233.22	0.879208	0.103026	1.31934e-18	1.66812e-17
ENSGALG00000006382	PTPRJ	328.077	0.879175	0.207614	1.82194e-06	7.50009e-06
ENSGALG00000048280		242.543	0.878919	0.16527	8.93725e-09	4.84555e-08
ENSGALG00000035530	TFCP2	2828.15	0.87816	0.07811	2.42807e-30	6.70749e-29
ENSGALG00000040156	CCDC88C	586.911	0.877729	0.146512	1.84305e-10	1.17996e-09
ENSGALG00000023089	SSBP2	444.454	0.877701	0.160391	3.83928e-09	2.16386e-08
ENSGALG00000054226		63.1195	0.876951	0.2839	0.000144527	0.000463476
ENSGALG00000009293	CHN1	3431.68	0.876634	0.0623633	6.89428e-46	4.55135e-44
ENSGALG00000006050	CYP2R1	1288.6	0.87512	0.0846504	4.61153e-26	9.60964e-25
ENSGALG00000016860	ERCC5	2459.35	0.874324	0.114756	2.4062e-15	2.34335e-14
ENSGALG00000004252		5.8317	0.87383	0.978418	0.00952707	0.0218576
ENSGALG00000014258		91.8039	0.873588	0.305694	0.000303043	0.000918941
ENSGALG00000016042	CHAF1B	2288.93	0.872726	0.0773519	1.58858e-30	4.44252e-29
ENSGALG00000003532	DDX5	64765.3	0.872642	0.099735	2.07227e-19	2.79566e-18
ENSGALG00000010255	NASP	5403.55	0.872141	0.0837111	2.01935e-26	4.3255e-25
ENSGALG00000014060	EED	1255.65	0.871962	0.1006	4.28066e-19	5.62421e-18
ENSGALG00000051546		196.602	0.871328	0.205584	1.87001e-06	7.68029e-06
ENSGALG00000030263	RABL6	5177.63	0.868979	0.0608981	3.48775e-47	2.40088e-45
ENSGALG00000054991		4808.91	0.868532	0.079116	4.93858e-29	1.2508e-27
ENSGALG00000016154	ARC	12.5905	0.868457	0.77827	0.0105018	0.0238494
ENSGALG00000000309		596.307	0.86787	0.147694	3.89053e-10	2.41591e-09
ENSGALG00000001889	CARD9	143.041	0.86771	0.235731	1.87393e-05	6.76799e-05
ENSGALG00000005894	USP8	4716.72	0.866991	0.0929544	1.09346e-21	1.74047e-20
ENSGALG00000015053	GLDC	3273.89	0.865758	0.0779579	1.21319e-29	3.18795e-28
ENSGALG00000007666	KCNIP2	8.5106	0.864982	0.78291	0.0106976	0.0242666
ENSGALG00000009061	ACTL6A	7553.75	0.864897	0.0917756	4.41364e-22	7.15961e-21
ENSGALG00000012481	TNFAIP6	14264.6	0.864236	0.0604876	2.74477e-47	1.92229e-45
ENSGALG00000014615	LAMA1	2554.77	0.86324	0.0869601	3.2799e-24	6.09373e-23
ENSGALG00000031862	BCL11B	1667	0.863233	0.089217	3.93513e-23	6.77936e-22
ENSGALG00000002624	BMS1	3937.37	0.862655	0.0865786	2.2701e-24	4.26187e-23
ENSGALG00000054834		123.592	0.862546	0.291171	0.000232778	0.000721631
ENSGALG00000003047	SUGP2	1654.42	0.86205	0.129018	2.31882e-12	1.77105e-11
ENSGALG00000006670	PPP1R3C	2297.41	0.86179	0.102402	3.97977e-18	4.86389e-17
ENSGALG00000013438	TEX10	3054.03	0.860765	0.0813163	3.659e-27	8.22026e-26
ENSGALG00000002442	ANKS4B	36.6514	0.859956	0.380691	0.00164467	0.00438614
ENSGALG00000010279	TMEM69	1508.45	0.859542	0.0867519	4.03592e-24	7.44681e-23
ENSGALG00000006751	THY1	27908.7	0.859472	0.0523292	1.39071e-61	1.69708e-59
ENSGALG00000004343	HPD	278.652	0.859426	0.155943	3.40071e-09	1.92408e-08
ENSGALG00000025557	RNase_MRP	77.3819	0.859424	0.307009	0.00038765	0.00115485
ENSGALG00000026958	FPGT	815.134	0.858889	0.135564	2.33322e-11	1.64623e-10
ENSGALG00000045427	UPP2	19.4933	0.857658	0.624578	0.00882107	0.0203801
ENSGALG00000006138	HELZ2	366.504	0.857508	0.134714	1.93889e-11	1.37342e-10
ENSGALG00000004870	PIH1D3	352.607	0.857192	0.186181	3.80637e-07	1.7117e-06
ENSGALG00000004071	NETO2	14.0666	0.85617	0.69135	0.0102184	0.0232878
ENSGALG00000048996		239.182	0.855664	0.172813	6.97065e-08	3.4264e-07
ENSGALG00000002023	PIGO	600.322	0.854548	0.155757	4.00971e-09	2.25361e-08
ENSGALG00000053046		463.372	0.854055	0.149444	1.08659e-09	6.47002e-09
ENSGALG00000008623	TOR4A	17.6538	0.853971	0.593916	0.00824631	0.0191953
ENSGALG00000037257	HLX	196.349	0.852193	0.19415	1.05659e-06	4.48709e-06
ENSGALG00000003851	TRIT1	1179.18	0.85172	0.0956957	6.02033e-20	8.43999e-19
ENSGALG00000007882		1220.23	0.851106	0.117634	4.89562e-14	4.33766e-13
ENSGALG00000004236	TRAF3IP1	1154.31	0.850842	0.122245	3.5623e-13	2.93362e-12
ENSGALG00000025800		24.6591	0.850156	0.449948	0.0038909	0.00968547
ENSGALG00000046914		508.494	0.849838	0.142805	2.72045e-10	1.71242e-09
ENSGALG00000002193	ARHGEF4	289.114	0.849298	0.178728	1.94777e-07	9.04951e-07
ENSGALG00000011421	HAL	16.0465	0.849203	0.657188	0.0100033	0.0228509
ENSGALG00000012546	MCM5	10306.3	0.849042	0.0816343	2.74397e-26	5.78532e-25
ENSGALG00000034132	CACFD1	137.772	0.847974	0.269377	0.000138536	0.000445161
ENSGALG00000008389	VBP1	4832.9	0.847671	0.0526958	3.67471e-59	4.19803e-57
ENSGALG00000040220	TWIST3	6.83702	0.846513	0.859569	0.0115919	0.0260786
ENSGALG00000017134	IFT88	620.613	0.846501	0.111633	3.67094e-15	3.52183e-14
ENSGALG00000015110	FAM189A2	144.013	0.84625	0.19977	2.15554e-06	8.77248e-06
ENSGALG00000002952	NRG4	218.564	0.844948	0.187906	6.71353e-07	2.92728e-06
ENSGALG00000010151	CCDC167	1631.48	0.844639	0.0949203	6.34664e-20	8.88198e-19
ENSGALG00000016687	P2RY8	1020.83	0.8445	0.137406	8.39704e-11	5.57541e-10
ENSGALG00000016325	GSTA3	47.6963	0.843514	0.613909	0.00935346	0.021496
ENSGALG00000030254	METAP1D	154.984	0.843372	0.320384	0.000678262	0.00194058
ENSGALG00000034828		69.4084	0.843302	0.279305	0.000214985	0.000670599
ENSGALG00000037131		5143	0.843256	0.0675856	1.15994e-36	4.61342e-35
ENSGALG00000055027		21.0064	0.842444	0.614582	0.0094329	0.0216569
ENSGALG00000037316	OCLN	68.3818	0.842419	0.356294	0.00138288	0.00373811
ENSGALG00000013565		4683.48	0.842204	0.118056	1.07243e-13	9.20826e-13
ENSGALG00000008518		39.1905	0.842064	0.462193	0.00460749	0.0112861
ENSGALG00000024480	TIMMDC1	2674.93	0.841937	0.0982842	1.20731e-18	1.5325e-17
ENSGALG00000004203	PSMG3	1503.89	0.841638	0.0891384	4.18901e-22	6.80893e-21
ENSGALG00000029287	TMEM67	368.128	0.841503	0.173104	1.18175e-07	5.65693e-07
ENSGALG00000003578	FN1	66959.5	0.841492	0.0769789	9.46309e-29	2.35597e-27
ENSGALG00000005772	BOK	241.116	0.841294	0.174104	1.36759e-07	6.47723e-07
ENSGALG00000054044		3903.24	0.841198	0.0665733	1.57654e-37	6.4618e-36
ENSGALG00000021362	GPRC5C	12.884	0.841139	0.683856	0.010961	0.0248221
ENSGALG00000016125	LCA5L	31.7482	0.840745	0.435524	0.00374118	0.00934455
ENSGALG00000014769	NLN	3523.64	0.840598	0.0631466	2.33314e-41	1.20456e-39
ENSGALG00000026311	C12orf75	120.527	0.840023	0.264562	0.000131925	0.00042484
ENSGALG00000015783	IMMT	11163.1	0.839918	0.057381	1.92646e-49	1.45687e-47
ENSGALG00000035237		2163.73	0.839889	0.088243	2.04164e-22	3.39038e-21
ENSGALG00000049609		455.326	0.83975	0.139057	1.67362e-10	1.0762e-09
ENSGALG00000008234	ORC2	441.792	0.838281	0.16032	1.79223e-08	9.44365e-08
ENSGALG00000017167	SLC35F2	464.794	0.837868	0.123858	1.48659e-12	1.15291e-11
ENSGALG00000028851	RAB8A	25416.1	0.837809	0.0486459	2.17629e-67	3.30713e-65
ENSGALG00000005374	MYO19	1103.28	0.836378	0.121986	7.94282e-13	6.34323e-12
ENSGALG00000004004	PHKB	1177.22	0.836075	0.162527	2.84184e-08	1.46024e-07
ENSGALG00000040492	LONP1	10807.2	0.836025	0.0589738	1.55861e-46	1.05046e-44
ENSGALG00000003029	PLPP6	554.073	0.835976	0.117196	1.11288e-13	9.51559e-13
ENSGALG00000049230		63.3655	0.835654	0.349786	0.00134398	0.00364396
ENSGALG00000013728	PPAT	3053.5	0.835582	0.0754191	1.89391e-29	4.92845e-28
ENSGALG00000036645	KIF15	6286.39	0.835453	0.114971	4.2031e-14	3.74881e-13
ENSGALG00000004038	ADAL	888.968	0.835351	0.110736	5.24554e-15	4.99085e-14
ENSGALG00000005587	EIF4G2	132619	0.835041	0.0690361	1.34266e-34	4.67116e-33
ENSGALG00000001607	CYBC1	122.585	0.834967	0.208438	6.09695e-06	2.34335e-05
ENSGALG00000015656	PALM2AKAP2	1200.48	0.834865	0.112406	1.27275e-14	1.17757e-13
ENSGALG00000029892	LMO2	300.059	0.834333	0.197973	2.52144e-06	1.01665e-05
ENSGALG00000036962	KPNB1	16643.8	0.834211	0.0715005	2.26635e-32	7.0612e-31
ENSGALG00000040342	ADAMTS1	244.1	0.8339	0.177621	2.78329e-07	1.26827e-06
ENSGALG00000016231	DDX3X	18782.9	0.833864	0.0663423	3.79897e-37	1.53753e-35
ENSGALG00000009082	COQ8A	9951.05	0.833683	0.078019	1.43048e-27	3.30118e-26
ENSGALG00000009782	NAA15	7735.48	0.83213	0.0957463	4.27057e-19	5.61554e-18
ENSGALG00000016843	COL4A2	3.57272	0.832065	1.18962	0.00622641	0.0148916
ENSGALG00000000557	ETNK2	86.6443	0.831988	0.280788	0.000271807	0.000831738
ENSGALG00000007809	TSHZ2	2508.68	0.831953	0.0684369	6.4922e-35	2.29334e-33
ENSGALG00000009035	GTPBP10	1709.34	0.831901	0.0820149	4.29094e-25	8.36786e-24
ENSGALG00000029462		8.41841	0.831233	0.895284	0.0120064	0.0269209
ENSGALG00000052647		1266.03	0.831223	0.0932503	5.89915e-20	8.28453e-19
ENSGALG00000006051	CDC7	1229.11	0.830886	0.125124	3.59272e-12	2.70428e-11
ENSGALG00000038678	EPB41L3	10.317	0.830395	0.876633	0.01222	0.0273502
ENSGALG00000054835		41.329	0.830216	0.500492	0.00652307	0.0155388
ENSGALG00000004325	P4HA1	17869.9	0.830159	0.0691486	4.10969e-34	1.38202e-32
ENSGALG00000002612	U2SURP	5861.61	0.829955	0.0848439	1.63409e-23	2.90529e-22
ENSGALG00000009093	PNO1	1980.46	0.829754	0.0938918	1.18083e-19	1.61741e-18
ENSGALG00000009330	DEGS1	7689.53	0.829094	0.0828221	1.67687e-24	3.17404e-23
ENSGALG00000035201		2920.7	0.828118	0.0716259	8.01273e-32	2.43526e-30
ENSGALG00000001947	ELP1	1580.3	0.827977	0.0784233	5.77998e-27	1.27715e-25
ENSGALG00000011677	HSPBAP1	238.568	0.827644	0.164596	5.43111e-08	2.70598e-07
ENSGALG00000049427	RELT	411.686	0.827492	0.131379	3.47696e-11	2.39653e-10
ENSGALG00000047206		91.5608	0.826576	0.277891	0.000269718	0.000826445
ENSGALG00000005776		142.701	0.826287	0.223201	2.14666e-05	7.69605e-05
ENSGALG00000027777	CNN2	7587.4	0.825608	0.0511235	1.47193e-59	1.70574e-57
ENSGALG00000054287		299.686	0.825431	0.186717	1.05216e-06	4.47182e-06
ENSGALG00000010182	SLC29A1	2307.87	0.825193	0.105535	6.4503e-16	6.6095e-15
ENSGALG00000054844		70.8141	0.825025	0.331853	0.0011039	0.00304271
ENSGALG00000002038	DENND2C	3804.64	0.824902	0.0728988	1.38394e-30	3.89048e-29
ENSGALG00000003548	BAIAP2L1	34.0532	0.824173	0.420334	0.0038001	0.00948435
ENSGALG00000030313	RAD51	2829.61	0.824129	0.0978334	4.4868e-18	5.45871e-17
ENSGALG00000000883	MAPKAPK2	8734.4	0.823904	0.0718977	2.6768e-31	7.91153e-30
ENSGALG00000002639	TRPC1	958.649	0.823261	0.129826	2.69535e-11	1.88686e-10
ENSGALG00000002138	HYAL2	896.446	0.822768	0.0952943	7.3647e-19	9.50565e-18
ENSGALG00000052784	BBS12	620.915	0.822486	0.114285	7.48336e-14	6.5299e-13
ENSGALG00000004240	ORAI1	2776.11	0.822397	0.0759892	3.42511e-28	8.21008e-27
ENSGALG00000036616	NUAK2	195.234	0.82238	0.17348	2.36473e-07	1.08925e-06
ENSGALG00000013268		66.1246	0.822372	0.311661	0.000741221	0.00210649
ENSGALG00000035447		3869.84	0.821984	0.0598087	7.20592e-44	4.20554e-42
ENSGALG00000050394		121.537	0.821759	0.261927	0.000164207	0.000521808
ENSGALG00000052487		3.51774	0.821647	1.18082	0.00648828	0.0154605
ENSGALG00000001434	STOM	88.2623	0.821489	0.254351	0.000120937	0.000391725
ENSGALG00000053164		519.82	0.821381	0.142592	9.82627e-10	5.8688e-09
ENSGALG00000009836	ELMOD2	1243.17	0.820405	0.130478	3.85956e-11	2.65003e-10
ENSGALG00000010538	TTC27	2495.71	0.820309	0.0644363	5.19706e-38	2.20301e-36
ENSGALG00000016070	WRB	2263.94	0.820238	0.105833	1.13733e-15	1.14501e-14
ENSGALG00000008936		78.066	0.820198	0.296234	0.000517838	0.00151056
ENSGALG00000033806	ITPRIPL2	776.568	0.819917	0.141151	7.43259e-10	4.50091e-09
ENSGALG00000007796	BCAS1	2029.48	0.819494	0.111353	2.28308e-14	2.07656e-13
ENSGALG00000037860		736.825	0.817468	0.106105	1.65214e-15	1.63469e-14
ENSGALG00000006623	ATP11C	1524.85	0.817171	0.0787634	4.18701e-26	8.74764e-25
ENSGALG00000001841	ROGDI	763.322	0.817168	0.132345	8.04761e-11	5.35223e-10
ENSGALG00000042254		3611.28	0.816869	0.0885369	3.60661e-21	5.51188e-20
ENSGALG00000009325	OLA1	4345.8	0.816727	0.0640644	4.19689e-38	1.78373e-36
ENSGALG00000048294		28.4927	0.816648	0.459553	0.00563238	0.013594
ENSGALG00000008844	SLC31A1	5534.29	0.813395	0.0662793	1.70936e-35	6.20143e-34
ENSGALG00000047422		7.19247	0.812988	0.737611	0.0133737	0.029689
ENSGALG00000006843	NCBP2	5471.98	0.812928	0.054794	1.16006e-50	9.43746e-49
ENSGALG00000006080	GPC4	4530.49	0.812767	0.0759329	1.30012e-27	3.01329e-26
ENSGALG00000013740	SLC20A1	11813.6	0.8118	0.0531826	1.8001e-53	1.65691e-51
ENSGALG00000016187	WDR4	1869.77	0.811775	0.0774861	1.47924e-26	3.20264e-25
ENSGALG00000000775	CTSS	22.7929	0.811374	0.474618	0.00651322	0.0155177
ENSGALG00000015218	SLC19A2	44.66	0.811056	0.454026	0.00568248	0.0136958
ENSGALG00000004704		5.07897	0.810611	0.9866	0.0113516	0.0255951
ENSGALG00000054564	KLHL15	1159.19	0.810595	0.0924891	2.48047e-19	3.32408e-18
ENSGALG00000016727	JADE3	877.628	0.809685	0.134783	2.35896e-10	1.49481e-09
ENSGALG00000049436		4.91423	0.809255	0.982536	0.0114801	0.025856
ENSGALG00000030691	PPM1B	8209.56	0.80899	0.0580213	4.77509e-45	2.96978e-43
ENSGALG00000050497		37.07	0.808499	0.420802	0.00443546	0.0109162
ENSGALG00000003021	CHRNA5	48.3422	0.808086	0.457198	0.00596445	0.014314
ENSGALG00000012606	ISCA1	1218.5	0.807913	0.0818986	7.99411e-24	1.4501e-22
ENSGALG00000014202	GABRA4	222.331	0.807819	0.233424	5.79478e-05	0.000195974
ENSGALG00000016094	SFXN5	181.273	0.806741	0.176795	5.9793e-07	2.62724e-06
ENSGALG00000040956	CHIC1	370.816	0.8063	0.158473	4.43266e-08	2.23269e-07
ENSGALG00000050647		172.524	0.806112	0.225356	3.81764e-05	0.000132303
ENSGALG00000051882		279.848	0.8061	0.163644	1.02061e-07	4.91625e-07
ENSGALG00000028046	INSIG2	1316.58	0.805204	0.0998424	9.83005e-17	1.07351e-15
ENSGALG00000053601	LPXN	70.3856	0.80487	0.294272	0.000616969	0.00177562
ENSGALG00000006113	ZNF326	3979.07	0.803479	0.0636068	1.97483e-37	8.07376e-36
ENSGALG00000013715	DLC1	1135.19	0.803239	0.145136	3.96014e-09	2.22808e-08
ENSGALG00000008889	TTC14	1069.49	0.802256	0.16613	1.69021e-07	7.92143e-07
ENSGALG00000009007	PCARE	7.46566	0.80208	0.825509	0.0140746	0.0310907
ENSGALG00000039811	NIPA1	494.984	0.801698	0.128583	5.91831e-11	3.98712e-10
ENSGALG00000037241	KCNAB2	254.841	0.800949	0.18121	1.19402e-06	5.0481e-06
ENSGALG00000027440	COX20	1033.57	0.800817	0.0821397	2.58645e-23	4.54831e-22
ENSGALG00000002055	HES4	289.709	0.800558	0.153432	2.29578e-08	1.19369e-07
ENSGALG00000041911	AAK1	2880.94	0.800305	0.106324	7.04931e-15	6.67551e-14
ENSGALG00000023898		3011.11	0.800088	0.101473	4.31148e-16	4.46619e-15
ENSGALG00000011581	KIF26A	21912.6	0.79971	0.0926227	8.20156e-19	1.05436e-17
ENSGALG00000054815		64.1067	0.799257	0.421336	0.00486558	0.011875
ENSGALG00000053225		5612.6	0.799112	0.0696852	2.73548e-31	8.07016e-30
ENSGALG00000033408	ZBTB7C	117.057	0.798559	0.264255	0.000268158	0.000822291
ENSGALG00000041072	TATDN1	1360.58	0.798136	0.0874617	1.00153e-20	1.48687e-19
ENSGALG00000002116	TEN1	136.135	0.797363	0.255175	0.000193838	0.000609
ENSGALG00000021737	gga-mir-365-2	3.8732	0.797212	1.0189	0.0110021	0.0248941
ENSGALG00000008459	BMPR2	673.988	0.797014	0.187364	2.56263e-06	1.0312e-05
ENSGALG00000047017	PHYHIP	530.079	0.796254	0.136398	7.01799e-10	4.25945e-09
ENSGALG00000043701	ELK3	6207.09	0.796064	0.0578412	6.20668e-44	3.64881e-42
ENSGALG00000005579	GFER	1022.51	0.795641	0.0988272	1.15119e-16	1.2504e-15
ENSGALG00000007904	DLAT	3074.4	0.795529	0.0819573	4.03493e-23	6.94388e-22
ENSGALG00000046765		73.6675	0.795432	0.335233	0.00171086	0.00454537
ENSGALG00000003930	APBA2	336.841	0.795035	0.182851	1.70305e-06	7.04848e-06
ENSGALG00000049094		146.993	0.794417	0.214572	2.52086e-05	8.94405e-05
ENSGALG00000012480	NMI	1917.12	0.794372	0.0918243	7.24743e-19	9.36931e-18
ENSGALG00000000402	LOXL2	12127	0.793778	0.0980421	8.00474e-17	8.78939e-16
ENSGALG00000009538		3384.25	0.792828	0.0740335	1.34485e-27	3.11248e-26
ENSGALG00000008425	MAP1A	192.345	0.792797	0.198061	7.64628e-06	2.9073e-05
ENSGALG00000047399		259.673	0.791442	0.193965	5.56443e-06	2.14841e-05
ENSGALG00000009269	PTGR2	2669.33	0.791017	0.224064	4.89693e-05	0.000167544
ENSGALG00000018700	PLPP7	108.828	0.790993	0.260523	0.000266352	0.00081722
ENSGALG00000009302	EMX2	100.747	0.790799	0.285695	0.000602643	0.00173812
ENSGALG00000038923		106.695	0.790735	0.246378	0.000151467	0.000483998
ENSGALG00000008810	FAM161A	462.5	0.790208	0.136551	9.7647e-10	5.83419e-09
ENSGALG00000014983	F2R	161.825	0.790179	0.223038	4.6967e-05	0.000161207
ENSGALG00000047957		11.0643	0.789922	1.28581	0.00400161	0.00994107
ENSGALG00000052088	SFR1	616.127	0.789613	0.157658	7.25833e-08	3.56129e-07
ENSGALG00000009983	NUBPL	2793.77	0.789291	0.0648514	6.63836e-35	2.33984e-33
ENSGALG00000052960		5.62785	0.78876	0.954652	0.0128066	0.0285521
ENSGALG00000040541	SLC5A6	2306.33	0.788505	0.0705496	7.90642e-30	2.09813e-28
ENSGALG00000043359	RRP9	4283.09	0.788288	0.0846706	1.87795e-21	2.93404e-20
ENSGALG00000017049	ALG5	983.654	0.788225	0.106651	2.09249e-14	1.91185e-13
ENSGALG00000002689	NUP35	1562.49	0.787377	0.0888687	1.17521e-19	1.61246e-18
ENSGALG00000005493		13.0396	0.786867	0.614675	0.0132641	0.0294783
ENSGALG00000005687	CUEDC2	1594.8	0.786696	0.0787936	2.66019e-24	4.97104e-23
ENSGALG00000036867	CBX6	749.832	0.786378	0.186566	3.2003e-06	1.27097e-05
ENSGALG00000015490	FBXL4	184.127	0.78615	0.171723	6.16656e-07	2.70288e-06
ENSGALG00000010147	CBWD1	1213.65	0.785867	0.101184	1.17361e-15	1.17801e-14
ENSGALG00000001962	PTBP1	13938.4	0.785845	0.0620722	1.49219e-37	6.1317e-36
ENSGALG00000016377	PXDN	696	0.785484	0.144083	6.86531e-09	3.76272e-08
ENSGALG00000035028	NAB2	1701.13	0.784382	0.0831292	5.81575e-22	9.37738e-21
ENSGALG00000002321	GOT2	14772.2	0.784357	0.063422	5.99709e-36	2.26232e-34
ENSGALG00000038768	FAM20C	282.602	0.784344	0.167208	3.62959e-07	1.63494e-06
ENSGALG00000049775	gga-mir-12227	11.1647	0.784147	0.583138	0.0125493	0.0280327
ENSGALG00000007920	PRR5L	559.38	0.783988	0.151061	2.88286e-08	1.48031e-07
ENSGALG00000013604	VIP	11.3005	0.783355	0.704682	0.0152022	0.0333074
ENSGALG00000010036	FOSL2	6890.65	0.783209	0.0794317	9.36019e-24	1.68795e-22
ENSGALG00000028505	PSMD4	7040.5	0.782912	0.0706858	2.50451e-29	6.48595e-28
ENSGALG00000009381	SIPA1L1	4236.71	0.782806	0.085008	4.97036e-21	7.54595e-20
ENSGALG00000023348	HPDL	107.717	0.782316	0.26762	0.000395867	0.00117774
ENSGALG00000041124	NOLC1	3512.4	0.782283	0.0988213	3.63655e-16	3.78898e-15
ENSGALG00000017005	CAB39L	3286.18	0.78228	0.197463	9.54353e-06	3.57256e-05
ENSGALG00000004424	SEC16B	107.172	0.782141	0.302216	0.0010441	0.00288925
ENSGALG00000005745	YTHDF1	6033.88	0.78193	0.0758377	9.62366e-26	1.94746e-24
ENSGALG00000015880	HMGN2P46	1113.16	0.781759	0.12781	1.36918e-10	8.91099e-10
ENSGALG00000010001	EGLN3	33.605	0.78164	0.434427	0.00637671	0.0152172
ENSGALG00000020438	DPH6	565.624	0.781606	0.137364	1.79513e-09	1.04352e-08
ENSGALG00000007489	CNNM1	365.798	0.78129	0.1884	4.40319e-06	1.72152e-05
ENSGALG00000016590	TLR7	1086.49	0.781149	0.11036	2.14695e-13	1.79933e-12
ENSGALG00000039571	PRPH	32.0624	0.780357	0.455091	0.00746119	0.0175069
ENSGALG00000023909		32.7383	0.779505	0.421514	0.00586653	0.0141021
ENSGALG00000029817	USP22	4296.05	0.779022	0.0716001	2.22117e-28	5.38834e-27
ENSGALG00000044251	RASSF7	25.0071	0.778704	0.437139	0.00668178	0.01587
ENSGALG00000009641	COL1A2	92617.2	0.778596	0.0762882	2.88199e-25	5.68214e-24
ENSGALG00000009992	ARHGAP5	6246.78	0.778489	0.116199	3.08428e-12	2.33466e-11
ENSGALG00000031238	SLIRP	2660.07	0.778271	0.103555	8.51105e-15	7.9986e-14
ENSGALG00000000909	GFAP	69.8897	0.778254	0.383584	0.00411582	0.0101855
ENSGALG00000009438	SLC39A9	10135.7	0.778127	0.0752369	7.02803e-26	1.44213e-24
ENSGALG00000011324		4104.19	0.77795	0.0740012	1.17349e-26	2.56481e-25
ENSGALG00000038192		3.42916	0.777638	1.14845	0.0076023	0.0178095
ENSGALG00000014554		1217.79	0.777601	0.0954153	5.54997e-17	6.17396e-16
ENSGALG00000004960	FBN1	17739.6	0.777111	0.0824475	6.61666e-22	1.06368e-20
ENSGALG00000008702	OVOL2	23.1979	0.77708	0.443235	0.00708351	0.0167206
ENSGALG00000022557	CLDN3	24.0544	0.775693	0.661735	0.0152325	0.0333513
ENSGALG00000027536	PERP1	63.8006	0.775573	0.385333	0.00431448	0.0106331
ENSGALG00000035679	LMO1	365.259	0.775554	0.163669	3.00188e-07	1.36248e-06
ENSGALG00000035901	GDF6	155.678	0.774736	0.194679	9.19801e-06	3.4593e-05
ENSGALG00000053353	BOP1	2819.72	0.774422	0.0736712	1.20164e-26	2.62276e-25
ENSGALG00000016480	SDC1	2042.11	0.774385	0.0894109	7.26133e-19	9.37976e-18
ENSGALG00000012232	DNAAF2	836.262	0.773277	0.112853	1.10337e-12	8.68676e-12
ENSGALG00000054216	NXPH4	4227.74	0.773103	0.0845031	9.03294e-21	1.346e-19
ENSGALG00000045085	IFIT5	140.399	0.772887	0.212763	3.65922e-05	0.000127032
ENSGALG00000030554	KCNN3	192.145	0.772594	0.205276	2.21353e-05	7.91818e-05
ENSGALG00000025386	gga-mir-1723	35.0736	0.772223	0.365405	0.00353387	0.00886521
ENSGALG00000008587	NDUFAF1	4466.03	0.772059	0.0781704	8.34171e-24	1.50976e-22
ENSGALG00000003636	FBLIM1	251.388	0.770928	0.156141	1.13991e-07	5.46153e-07
ENSGALG00000005613		65.2472	0.770587	0.267775	0.000482214	0.00141253
ENSGALG00000011833	SPATA5	2481.21	0.770564	0.0685292	3.97942e-30	1.07913e-28
ENSGALG00000036728	PRDM16	222.563	0.767536	0.192117	8.92952e-06	3.3667e-05
ENSGALG00000015044	GTF3C6	202.218	0.76752	0.192117	8.933e-06	3.3667e-05
ENSGALG00000004841	APLNR	41.1678	0.767454	0.466326	0.00890661	0.0205718
ENSGALG00000002155	HS6ST1	3232.31	0.767326	0.072141	3.28158e-27	7.38264e-26
ENSGALG00000049272		281.601	0.767312	0.185859	5.09945e-06	1.98028e-05
ENSGALG00000008926	CADPS2	10.4573	0.767295	0.684652	0.0162883	0.0354316
ENSGALG00000010140	EIF2B3	2308.47	0.767244	0.0769957	3.52331e-24	6.52339e-23
ENSGALG00000043734	LIPG	13772.4	0.766845	0.111271	8.60956e-13	6.85192e-12
ENSGALG00000031130	GGH	1167.29	0.766467	0.178164	2.40115e-06	9.71315e-06
ENSGALG00000052320		90.8796	0.766317	0.241775	0.000195512	0.000613661
ENSGALG00000004593	SULF2	10282.2	0.766106	0.0852394	4.0767e-20	5.82159e-19
ENSGALG00000010624	MEMO1	7220.33	0.764278	0.0534047	3.12375e-47	2.16885e-45
ENSGALG00000008155	KCTD18	10.3466	0.764273	0.724329	0.0168716	0.0365427
ENSGALG00000001717	SLC16A1	22536.2	0.763441	0.0779907	2.06737e-23	3.65144e-22
ENSGALG00000043731		7.28082	0.762664	0.734286	0.0170357	0.0368585
ENSGALG00000049668	MFSD4B	251.666	0.762474	0.190328	8.74162e-06	3.29998e-05
ENSGALG00000051625		190.407	0.762468	0.174279	1.76404e-06	7.28033e-06
ENSGALG00000006342	UEVLD	1289.27	0.762051	0.13351	1.76962e-09	1.02906e-08
ENSGALG00000032329	NPM3	6321	0.761951	0.0918479	1.75944e-17	2.03599e-16
ENSGALG00000020164	GAR1	1925.94	0.761799	0.078332	3.89569e-23	6.71861e-22
ENSGALG00000008249	DNAJC2	7110.58	0.761256	0.0729237	2.74202e-26	5.78532e-25
ENSGALG00000000504	ETV7	6.42549	0.761171	0.826341	0.0166048	0.0360132
ENSGALG00000029002		29.9837	0.759645	0.393616	0.00552458	0.0133679
ENSGALG00000030718		846.833	0.759326	0.0958227	3.7672e-16	3.92257e-15
ENSGALG00000028135		3.262	0.758565	1.12952	0.00831764	0.0193278
ENSGALG00000005507	NONO	20343	0.756305	0.0453519	3.3859e-63	4.36321e-61
ENSGALG00000042418	CHEK1	2584.84	0.756202	0.107447	3.2006e-13	2.65065e-12
ENSGALG00000050471		105.882	0.756081	0.255768	0.000407919	0.00120986
ENSGALG00000014906	MOCS2	1012.67	0.754775	0.102737	3.37213e-14	3.03454e-13
ENSGALG00000042976	UBTF	13365.1	0.75454	0.0691878	1.86243e-28	4.54545e-27
ENSGALG00000033902		66.1151	0.753765	0.396811	0.00603684	0.0144726
ENSGALG00000002759	PEAK1	6907.98	0.753739	0.0837342	3.78718e-20	5.42256e-19
ENSGALG00000026850	TICAM1	1338.33	0.753711	0.123475	1.67786e-10	1.07763e-09
ENSGALG00000050472		41.879	0.752811	0.398799	0.00620651	0.0148462
ENSGALG00000009069	CAPN14	14.7914	0.752431	0.737413	0.0178895	0.0384886
ENSGALG00000038954	LSM11	275.952	0.752353	0.156686	2.45205e-07	1.12722e-06
ENSGALG00000006782	MRPL46	1818.86	0.752283	0.0702261	1.54579e-27	3.56217e-26
ENSGALG00000016449	SLC66A3	232.671	0.75165	0.249304	0.000346786	0.00104118
ENSGALG00000006779	PDZD3	123.515	0.75131	0.262006	0.000547482	0.00158927
ENSGALG00000041783	TMEM19	1181.38	0.751056	0.0814659	5.15901e-21	7.81027e-20
ENSGALG00000033635	PTGS2	7009.67	0.751045	0.0683138	7.12705e-29	1.78265e-27
ENSGALG00000053285		5442.85	0.750941	0.099605	8.00136e-15	7.55043e-14
ENSGALG00000054250		1475.69	0.750547	0.109924	1.4428e-12	1.12003e-11
ENSGALG00000012348	MCM6	5951.56	0.750117	0.109156	1.06276e-12	8.37521e-12
ENSGALG00000002222	NOC2L	4014.98	0.749169	0.0715213	1.97913e-26	4.25065e-25
ENSGALG00000040397	HAUS1	1616.12	0.748935	0.099977	1.16492e-14	1.08028e-13
ENSGALG00000038551		555.276	0.748452	0.112108	4.13024e-12	3.08867e-11
ENSGALG00000051597		1936.97	0.748292	0.0906119	2.5546e-17	2.92879e-16
ENSGALG00000040899	GPAT2	74.3763	0.748119	0.293512	0.00137657	0.00372231
ENSGALG00000030195		45.5919	0.747923	0.34595	0.00357875	0.00897221
ENSGALG00000008145	TYW5	413.621	0.747118	0.12524	4.06137e-10	2.51617e-09
ENSGALG00000008153		18.6083	0.745674	0.602751	0.0166481	0.0360994
ENSGALG00000052067		30.552	0.745547	0.407145	0.00716077	0.0168807
ENSGALG00000004542	ZMYND8	2427.21	0.745073	0.0951454	8.43789e-16	8.55904e-15
ENSGALG00000008114	SFXN2	1170.16	0.744549	0.0920126	1.02951e-16	1.1205e-15
ENSGALG00000004889	SLC2A1	11011.9	0.744137	0.0631032	7.7024e-33	2.47152e-31
ENSGALG00000009306	SLC2A2	15.2505	0.743575	0.644941	0.017871	0.038454
ENSGALG00000053647		826.509	0.743517	0.153163	1.96321e-07	9.11072e-07
ENSGALG00000050120		22.8941	0.74307	0.51134	0.0132881	0.0295217
ENSGALG00000015762	LYRM2	150.196	0.742807	0.225632	0.000144967	0.000464796
ENSGALG00000034111	FOXF1	108.278	0.742751	0.244269	0.00033388	0.0010062
ENSGALG00000027330	SYNPO	126.508	0.742372	0.256637	0.000530284	0.00154407
ENSGALG00000033558		54.3587	0.741908	0.330453	0.00304572	0.00773459
ENSGALG00000012024	MRTFA	3266.67	0.741781	0.117038	4.00518e-11	2.74257e-10
ENSGALG00000011379	SLC44A5	84.9125	0.741665	0.295782	0.00158668	0.00424415
ENSGALG00000040161	C7orf25	493.68	0.741655	0.163101	8.78004e-07	3.77043e-06
ENSGALG00000010226		949.859	0.741206	0.094266	6.64578e-16	6.80548e-15
ENSGALG00000005886	WSCD1	3.27141	0.741045	1.11826	0.00882094	0.0203801
ENSGALG00000045511	PARP9	352.799	0.740897	0.260332	0.000614908	0.00177
ENSGALG00000004627		484.666	0.740729	0.166132	1.33113e-06	5.5867e-06
ENSGALG00000037483	ANP32B	10280.6	0.740696	0.0656507	2.92458e-30	8.05285e-29
ENSGALG00000044632		24.3805	0.740191	0.463845	0.0109835	0.0248591
ENSGALG00000018946	LMOD3	26.6552	0.740074	0.554214	0.0155329	0.0339306
ENSGALG00000040938	NLGN1	92.8219	0.739894	0.258937	0.000597103	0.00172244
ENSGALG00000052837	GNA12	1536.58	0.739663	0.095437	1.63183e-15	1.61559e-14
ENSGALG00000009496	NAF1	1601.46	0.739068	0.0763109	6.35337e-23	1.08296e-21
ENSGALG00000008034	CASKIN2	700.627	0.738738	0.108334	1.61241e-12	1.24749e-11
ENSGALG00000011544	BCL2L14	26.5828	0.738474	0.456472	0.0107015	0.024272
ENSGALG00000008015	UBE2V1	2276.69	0.738091	0.143513	4.55784e-08	2.28929e-07
ENSGALG00000002347	DIPK2A	4505.92	0.73678	0.0710346	6.12255e-26	1.26297e-24
ENSGALG00000016622	STS	30.6088	0.736709	0.425107	0.00892093	0.0205972
ENSGALG00000041471	TUBB	61026.2	0.736664	0.0793122	2.87433e-21	4.42213e-20
ENSGALG00000009755	LRIG3	8.51548	0.736662	0.869323	0.0173698	0.0374958
ENSGALG00000051219		5.21488	0.73621	0.908112	0.0163536	0.0355498
ENSGALG00000034124	NLRP3	1041.69	0.736208	0.138511	1.82335e-08	9.59505e-08
ENSGALG00000046000	ICE2	959.253	0.735663	0.115908	3.87849e-11	2.6619e-10
ENSGALG00000008689		513.132	0.735508	0.173256	3.56545e-06	1.41024e-05
ENSGALG00000009065	VMA21	3140.18	0.735084	0.0856595	1.71523e-18	2.1451e-17
ENSGALG00000046593		796.396	0.735053	0.112451	1.11853e-11	8.08674e-11
ENSGALG00000008988		1077.82	0.734676	0.110969	6.38241e-12	4.70947e-11
ENSGALG00000027165	RSFR	134.36	0.734395	0.381168	0.00629827	0.0150568
ENSGALG00000007417	ARMC4	16.0943	0.734264	0.733929	0.0194969	0.0415253
ENSGALG00000034271	UHRF1	12811.2	0.734249	0.120021	1.67757e-10	1.07763e-09
ENSGALG00000002240	C3orf18	317.544	0.734226	0.142043	4.03921e-08	2.04217e-07
ENSGALG00000052646	EXD3	232.977	0.734209	0.166489	1.71421e-06	7.0892e-06
ENSGALG00000032642	SMARCC1	8515.56	0.73317	0.0678267	5.82229e-28	1.37515e-26
ENSGALG00000036763		212.59	0.732942	0.197601	3.30642e-05	0.000115456
ENSGALG00000001513	CNTRL	4311.08	0.732901	0.0952933	2.66951e-15	2.58572e-14
ENSGALG00000012857	DENND2A	1106.17	0.732631	0.0886449	2.5797e-17	2.95546e-16
ENSGALG00000034950	SMPD3	24.5303	0.732272	0.442568	0.0103983	0.0236509
ENSGALG00000028568	DNAL1	479.399	0.732111	0.186888	1.45236e-05	5.33027e-05
ENSGALG00000053036		28.8265	0.732105	0.436125	0.010004	0.0228509
ENSGALG00000003747		13898.8	0.731368	0.0590561	6.04441e-36	2.27484e-34
ENSGALG00000035636	PHYH	574.832	0.731291	0.121283	2.93411e-10	1.84045e-09
ENSGALG00000002042		2411.09	0.731241	0.0810218	3.34845e-20	4.8244e-19
ENSGALG00000008195	NPHP1	2547.93	0.731019	0.0750321	3.72328e-23	6.44195e-22
ENSGALG00000053399		310.833	0.730914	0.167926	2.25665e-06	9.15849e-06
ENSGALG00000026332	EEF1AKMT4	305.292	0.730759	0.171228	3.29828e-06	1.30795e-05
ENSGALG00000002960	HMGCS2	20.038	0.730408	0.509968	0.0145009	0.0319287
ENSGALG00000033730		746.933	0.72963	0.128841	2.64767e-09	1.5129e-08
ENSGALG00000009626	THBS1	238243	0.729392	0.0938812	1.46536e-15	1.45704e-14
ENSGALG00000036587	LHX4	12.6015	0.728428	0.592191	0.0181609	0.03901
ENSGALG00000019384	MAPK12	17.9515	0.728161	0.703965	0.0200731	0.0426004
ENSGALG00000014067	SGTA	2479.67	0.727184	0.0806199	3.57303e-20	5.12962e-19
ENSGALG00000028262		1024.43	0.727177	0.0904733	1.72402e-16	1.84645e-15
ENSGALG00000010936	MYF6	197.106	0.726868	0.288853	0.00166799	0.0044432
ENSGALG00000028175	GJA9	9.56159	0.726652	0.83488	0.018843	0.0403139
ENSGALG00000012575	TLE1	1461.39	0.726564	0.0825832	2.64573e-19	3.5426e-18
ENSGALG00000010896	TMEM161B	212.392	0.726051	0.200293	4.71258e-05	0.000161718
ENSGALG00000011019	ROR1	433.229	0.725791	0.195283	3.32134e-05	0.000115952
ENSGALG00000006895	CEP131	2990.85	0.725656	0.0941665	2.44385e-15	2.37715e-14
ENSGALG00000040001		191.938	0.725656	0.197425	3.89282e-05	0.000134684
ENSGALG00000049176		576.898	0.724978	0.149786	2.28927e-07	1.0563e-06
ENSGALG00000002659	WDR5B	5731.94	0.724752	0.0534053	1.16849e-42	6.42391e-41
ENSGALG00000026313	RND3	7759.08	0.724734	0.0761094	3.26011e-22	5.34221e-21
ENSGALG00000010681	CPT2	1182.79	0.724269	0.118908	2.06637e-10	1.3151e-09
ENSGALG00000039967	RP11-529K1.3	14047.8	0.724149	0.0505878	3.48267e-47	2.40088e-45
ENSGALG00000031286	APIP	1306.08	0.723924	0.0916799	5.46717e-16	5.62716e-15
ENSGALG00000015378	ABHD10	96.9454	0.723878	0.318409	0.00311695	0.00790176
ENSGALG00000051263		64.2624	0.723867	0.341551	0.00443678	0.0109178
ENSGALG00000038915	E2F5	1282.45	0.723864	0.0876102	2.72839e-17	3.11694e-16
ENSGALG00000015314	BEND3	619.623	0.723757	0.103021	4.01467e-13	3.29772e-12
ENSGALG00000054469	DISP1	4269.04	0.723446	0.0537852	6.00402e-42	3.16055e-40
ENSGALG00000005052		11.1023	0.723283	0.669078	0.0203415	0.0431133
ENSGALG00000017334		358.582	0.723099	0.205308	7.01609e-05	0.000235106
ENSGALG00000046448	ZNF385A	907.746	0.72302	0.101203	1.70914e-13	1.44493e-12
ENSGALG00000006457	RBMXL1	6371.34	0.722966	0.064045	2.92964e-30	8.05301e-29
ENSGALG00000049095		109.047	0.722962	0.22627	0.000221673	0.000689592
ENSGALG00000047289	TNFAIP8L3	403.488	0.722774	0.135334	1.68061e-08	8.88747e-08
ENSGALG00000006712	RSPH14	48.9314	0.722641	0.426158	0.0101853	0.0232287
ENSGALG00000001374	SLC35E2A	1678.81	0.722544	0.0776609	2.62522e-21	4.05122e-20
ENSGALG00000012052	SNX4	871.058	0.721967	0.102934	4.3876e-13	3.58577e-12
ENSGALG00000030849		297.882	0.721744	0.161325	1.35127e-06	5.6624e-06
ENSGALG00000053325		12.6165	0.721311	0.714914	0.0207742	0.0439378
ENSGALG00000038789	CLIC3	22.7296	0.720964	0.569996	0.0182528	0.0391773
ENSGALG00000012222	RAP1GDS1	5002.64	0.720913	0.0582232	6.48775e-36	2.4247e-34
ENSGALG00000054252	TM4SF1	35.3304	0.720826	0.418785	0.00984197	0.0225159
ENSGALG00000008032		15.6068	0.720568	0.622226	0.0198646	0.0422297
ENSGALG00000041706	FAM13B	582.405	0.720301	0.15585	6.78422e-07	2.95672e-06
ENSGALG00000031384		468.314	0.720244	0.136974	2.66021e-08	1.37122e-07
ENSGALG00000009988	ELOVL1	2474.67	0.720106	0.0788691	1.33357e-20	1.96176e-19
ENSGALG00000052408		12.507	0.719962	0.589996	0.0190588	0.0407269
ENSGALG00000015200	DAZAP1	9850.25	0.719958	0.0535607	6.84964e-42	3.58228e-40
ENSGALG00000008616	DDR1	4525.52	0.719555	0.0749561	1.57562e-22	2.63552e-21
ENSGALG00000011419	DUSP4	5761.14	0.719334	0.0594394	2.05276e-34	7.03527e-33
ENSGALG00000016313	GCLC	1568.73	0.718801	0.104073	9.49698e-13	7.52471e-12
ENSGALG00000013851	UBE3B	1985.1	0.717996	0.104098	1.01767e-12	8.03954e-12
ENSGALG00000003131	DGKE	386.234	0.717809	0.137922	3.58982e-08	1.82585e-07
ENSGALG00000031444		12.2807	0.717725	0.582491	0.0190773	0.040761
ENSGALG00000011116	VRK1	3516.19	0.717391	0.0864752	2.11251e-17	2.43059e-16
ENSGALG00000003485	CCND3	1738.55	0.717141	0.0798026	5.04307e-20	7.13203e-19
ENSGALG00000011835	FGF2	942.983	0.71707	0.178093	9.91414e-06	3.70474e-05
ENSGALG00000023881	PLXDC1	195.517	0.716643	0.183775	1.67564e-05	6.09971e-05
ENSGALG00000004375	VPS35	4144.28	0.716259	0.0909633	6.72544e-16	6.87394e-15
ENSGALG00000015287	LNP1	401.816	0.715968	0.148506	2.6164e-07	1.19629e-06
ENSGALG00000005860	ACAA1	1230.76	0.715967	0.094805	8.38045e-15	7.88507e-14
ENSGALG00000005064	PRPSAP2	2854.24	0.715852	0.0876677	6.30486e-17	6.98478e-16
ENSGALG00000032632	SLC49A4	427.084	0.715826	0.161998	1.78736e-06	7.36527e-06
ENSGALG00000037504	CFAP36	3.08311	0.714792	1.09349	0.0099715	0.0227831
ENSGALG00000006880	SLC38A10	8837.67	0.714485	0.0736428	5.92741e-23	1.01357e-21
ENSGALG00000043327		372.681	0.71339	0.19606	4.74313e-05	0.000162627
ENSGALG00000037616		27.0904	0.71327	0.404724	0.00951205	0.0218262
ENSGALG00000016238	MED14	2515.58	0.71326	0.101081	3.35599e-13	2.7708e-12
ENSGALG00000007351	MTPAP	3079.06	0.712597	0.0667704	2.78488e-27	6.29156e-26
ENSGALG00000002180	CHFR	3066.82	0.711959	0.0872707	6.81046e-17	7.5139e-16
ENSGALG00000013064	NSUN2	2335.17	0.711766	0.0890595	2.65251e-16	2.79808e-15
ENSGALG00000051701		47.8337	0.711562	0.333765	0.00458808	0.0112403
ENSGALG00000032993	FTSJ3	5984.38	0.711416	0.0713317	4.05332e-24	7.47036e-23
ENSGALG00000004244	TTPAL	995.601	0.711388	0.132455	1.49437e-08	7.93645e-08
ENSGALG00000003461	USP49	1616.73	0.711237	0.0743353	2.21266e-22	3.66305e-21
ENSGALG00000000081	IL4I1	13.4034	0.711096	0.635197	0.0212377	0.0448357
ENSGALG00000004250		498.249	0.711094	0.109627	1.72254e-11	1.22556e-10
ENSGALG00000005699	NLK	1176.08	0.710981	0.103513	1.28103e-12	1.00072e-11
ENSGALG00000020488		2688.81	0.710475	0.0729377	4.11316e-23	7.07095e-22
ENSGALG00000054168		99.8526	0.710431	0.231488	0.000356229	0.00106697
ENSGALG00000047356	VASN	9032.45	0.710243	0.0723701	1.99878e-23	3.53418e-22
ENSGALG00000005534	TM9SF3	10176.9	0.709877	0.055615	5.37939e-38	2.27431e-36
ENSGALG00000013369	NCLN	3671	0.709866	0.0636536	1.4401e-29	3.75966e-28
ENSGALG00000021345	B3GNT9	426.105	0.709528	0.12827	6.1279e-09	3.3758e-08
ENSGALG00000034174		323.851	0.70911	0.177468	1.16756e-05	4.32744e-05
ENSGALG00000050167		7.73138	0.708762	0.858302	0.0194935	0.0415251
ENSGALG00000009451	PPID	5532.92	0.708619	0.0693845	3.57119e-25	7.00666e-24
ENSGALG00000047565		626.042	0.708296	0.183048	1.96517e-05	7.07689e-05
ENSGALG00000005575	AKAP1	3806.17	0.708203	0.0808323	3.9368e-19	5.19787e-18
ENSGALG00000052932	SHROOM3	393.388	0.707692	0.14356	1.57139e-07	7.39033e-07
ENSGALG00000001956	OLFML3	1081.45	0.707366	0.0964919	4.61407e-14	4.09722e-13
ENSGALG00000004533	KIAA2013	2269	0.707212	0.10734	8.8639e-12	6.46241e-11
ENSGALG00000017126	ZDHHC20	1148.6	0.706774	0.133042	2.09848e-08	1.09784e-07
ENSGALG00000025661		27.0845	0.706474	0.400399	0.00980267	0.0224324
ENSGALG00000006233	GALNT11	8788.26	0.705649	0.0747666	7.87014e-22	1.26016e-20
ENSGALG00000006134	HOGA1	46.6531	0.705624	0.364124	0.00710853	0.0167723
ENSGALG00000016304	LRRC1	541.293	0.704945	0.115445	2.03358e-10	1.29525e-09
ENSGALG00000053107		1360.86	0.704835	0.0883473	3.05348e-16	3.20218e-15
ENSGALG00000010413	NGB	6.11126	0.704421	0.872126	0.0193454	0.0412463
ENSGALG00000016022	RUNX1	434.148	0.703829	0.14982	5.05076e-07	2.24032e-06
ENSGALG00000045809		12.3739	0.703496	0.734014	0.0225139	0.047202
ENSGALG00000026973	KIF3C	400.515	0.703348	0.169713	6.38473e-06	2.44811e-05
ENSGALG00000004495		89.4151	0.703185	0.303185	0.0030926	0.00784746
ENSGALG00000002247	SETD6	2827.78	0.702721	0.0829417	4.99714e-18	6.04763e-17
ENSGALG00000017079	USPL1	1591.79	0.702483	0.0963055	6.17077e-14	5.41093e-13
ENSGALG00000015412	ARL13B	570.509	0.702258	0.177769	1.45174e-05	5.32921e-05
ENSGALG00000008187	EIF3J	5614.99	0.702	0.0755077	3.03032e-21	4.65323e-20
ENSGALG00000003913	MCEE	355.993	0.701447	0.148248	4.32867e-07	1.93684e-06
ENSGALG00000035978	CDCA7L	6172.27	0.701272	0.0701147	3.16366e-24	5.88456e-23
ENSGALG00000010915	IL6	3502.77	0.700991	0.198866	7.6829e-05	0.000255853
ENSGALG00000016731	MRPL19	1770.05	0.700934	0.0689798	6.24339e-25	1.21167e-23
ENSGALG00000016728	RP2	4099.87	0.700893	0.096503	7.83341e-14	6.81321e-13
ENSGALG00000009982	ZNF827	478.525	0.700743	0.14552	2.87211e-07	1.30615e-06
ENSGALG00000048534		2775.31	0.700704	0.084315	1.99409e-17	2.29763e-16
ENSGALG00000008222	SLC26A5	1332.35	0.700293	0.120728	1.33432e-09	7.86721e-09
ENSGALG00000054465		14.9099	0.70005	0.808188	0.0215606	0.0454162
ENSGALG00000012913	PKP2	5059.25	0.699786	0.0839565	1.62686e-17	1.89209e-16
ENSGALG00000005464		5528.18	0.6993	0.0657628	4.43857e-27	9.91629e-26
ENSGALG00000054203		38.5305	0.699046	0.553862	0.0203394	0.0431133
ENSGALG00000052641	PLD6	34.5156	0.69895	0.443856	0.0138711	0.030679
ENSGALG00000047014		5521.09	0.698745	0.116081	3.57374e-10	2.22864e-09
ENSGALG00000030877	CLUAP1	395.439	0.698601	0.155675	1.40203e-06	5.86442e-06
ENSGALG00000051529		16.1901	0.697584	0.48273	0.0167273	0.0362544
ENSGALG00000002412	GBA2	2084.77	0.69757	0.0885487	7.02947e-16	7.18013e-15
ENSGALG00000009925	MTA3	1197.8	0.69753	0.109775	4.32806e-11	2.95033e-10
ENSGALG00000041750	ADAMTS9	264.577	0.697341	0.190761	4.78107e-05	0.000163824
ENSGALG00000003906	MPHOSPH10	3088.6	0.697156	0.0830616	1.00423e-17	1.18074e-16
ENSGALG00000011294	THRB	2391.89	0.696972	0.115617	3.4086e-10	2.12978e-09
ENSGALG00000010861	OMA1	140.956	0.696239	0.245535	0.000787137	0.00222598
ENSGALG00000030943	KRAS	1275.68	0.695978	0.101876	1.75947e-12	1.35541e-11
ENSGALG00000038041	PHF14	2553.96	0.695938	0.0779681	9.4702e-20	1.30604e-18
ENSGALG00000054353		22.9773	0.695574	0.475532	0.0165106	0.0358282
ENSGALG00000012186	CASP6	721.523	0.695507	0.105816	1.03218e-11	7.47589e-11
ENSGALG00000013615	MTUS1	217.492	0.694937	0.212335	0.000194043	0.000609405
ENSGALG00000009567	TLL1	196.499	0.69488	0.209911	0.000170467	0.000540104
ENSGALG00000012956	TMTC1	3748.16	0.694779	0.0790688	3.30193e-19	4.38479e-18
ENSGALG00000035505	AOAH	76.3675	0.69426	0.351068	0.00694561	0.0164312
ENSGALG00000030918	RBM3	31243.8	0.693929	0.0541556	3.02052e-38	1.31499e-36
ENSGALG00000015056	LAMA3	1630.6	0.693793	0.0879133	6.37791e-16	6.53949e-15
ENSGALG00000049003		264.284	0.693789	0.16879	7.70034e-06	2.92609e-05
ENSGALG00000028187	FUNDC1	992.997	0.693777	0.0915106	7.29611e-15	6.90515e-14
ENSGALG00000016988	RUBCNL	231.453	0.693318	0.181812	2.62936e-05	9.30647e-05
ENSGALG00000013882	MXD1	3397.71	0.693184	0.0679047	3.97563e-25	7.79069e-24
ENSGALG00000054747		70.0758	0.692863	0.321053	0.00474843	0.0116066
ENSGALG00000038964		3.23095	0.692373	1.08261	0.0106127	0.0240876
ENSGALG00000010395	SIAH2	703.192	0.692343	0.133731	4.61967e-08	2.31963e-07
ENSGALG00000051325	H3C15	160.6	0.691557	0.18224	2.85316e-05	0.00010061
ENSGALG00000034340	ATP2C1	4292.96	0.691277	0.0875622	6.2917e-16	6.4552e-15
ENSGALG00000032405		84.2784	0.691262	0.281174	0.00231111	0.00599764
ENSGALG00000015577		128.062	0.691042	0.285495	0.0025508	0.00657833
ENSGALG00000015860	UBE3D	130.504	0.690715	0.220947	0.000324134	0.000979579
ENSGALG00000051476		6.37378	0.690598	0.80274	0.0225305	0.0472309
ENSGALG00000047682		5.78081	0.690465	0.76611	0.0233965	0.0488491
ENSGALG00000005959	GLMN	612.83	0.690278	0.14173	2.28012e-07	1.05238e-06
ENSGALG00000007912	ATP9A	77.2025	0.689281	0.268815	0.00176367	0.00467103
ENSGALG00000012045		16.4783	0.689036	0.692177	0.0243784	0.0506568
ENSGALG00000053398	TMEM80	487.555	0.688732	0.167777	8.05079e-06	3.05206e-05
ENSGALG00000016823	TFDP1	2648.13	0.687871	0.0665851	1.13961e-25	2.30325e-24
ENSGALG00000009704	CHST15	41.4577	0.687034	0.42684	0.0139568	0.0308518
ENSGALG00000000818		255.58	0.686333	0.190949	6.33371e-05	0.000213572
ENSGALG00000008983	GNB4	1909.37	0.686162	0.109808	8.92343e-11	5.90787e-10
ENSGALG00000038858	ZFP64	2985.24	0.68615	0.0712513	1.33382e-22	2.24271e-21
ENSGALG00000005649		73.1548	0.686028	0.318018	0.00492147	0.0119986
ENSGALG00000037727	OSGEPL1	252.864	0.684199	0.159348	3.60165e-06	1.42264e-05
ENSGALG00000002666	RAB11FIP3	936.528	0.683985	0.105129	1.68443e-11	1.20057e-10
ENSGALG00000002783	SLC43A2	2581.74	0.683749	0.075804	4.22392e-20	6.01582e-19
ENSGALG00000037238	PCCB	3486.37	0.683676	0.0696582	2.19496e-23	3.86832e-22
ENSGALG00000015348	ALCAM	2920.2	0.683586	0.113329	3.51559e-10	2.19493e-09
ENSGALG00000011193	C3H6orf120	1042.76	0.683334	0.125956	1.23986e-08	6.63069e-08
ENSGALG00000038374	SNX20	33.7892	0.683321	0.360106	0.00859882	0.0199094
ENSGALG00000002354	PUS1	3669.1	0.682854	0.0798297	2.67188e-18	3.29798e-17
ENSGALG00000012619	PRDM4	763.752	0.682697	0.107079	3.99215e-11	2.73524e-10
ENSGALG00000041834	AEBP1	11948.4	0.682606	0.0830415	4.55834e-17	5.12391e-16
ENSGALG00000008698	MGME1	2338.23	0.681959	0.0882928	2.52442e-15	2.4496e-14
ENSGALG00000030732	MAPK8IP1	26.066	0.681208	0.586917	0.0240274	0.0500043
ENSGALG00000002542	GUSB	940.205	0.680183	0.119501	2.74296e-09	1.56402e-08
ENSGALG00000044849		18.7288	0.679876	0.48577	0.0193181	0.0411991
ENSGALG00000012583	IDNK	37.0061	0.679499	0.421674	0.0144503	0.0318247
ENSGALG00000016442	RRM2	9621.23	0.679418	0.0756028	5.81232e-20	8.16971e-19
ENSGALG00000012006	RTN1	7.82522	0.679277	0.828737	0.0227132	0.0475705
ENSGALG00000010087	IPO13	941.138	0.679066	0.123127	7.60772e-09	4.14705e-08
ENSGALG00000044279		11.8999	0.678384	0.826815	0.0228563	0.0478514
ENSGALG00000006604	KIF3B	1283.89	0.677884	0.125493	1.44362e-08	7.68469e-08
ENSGALG00000020410	TMED8	532.503	0.677779	0.16317	6.83995e-06	2.61395e-05
ENSGALG00000007036	PITRM1	6162.49	0.677162	0.0755669	7.3922e-20	1.02561e-18
ENSGALG00000001051		4208.27	0.677048	0.0848711	3.41338e-16	3.56568e-15
ENSGALG00000015002	MRPS27	2097.23	0.676433	0.0782886	1.29056e-18	1.6343e-17
ENSGALG00000052510		28.6401	0.676432	0.387118	0.0117336	0.0263715
ENSGALG00000006521	TRPM5	8.38326	0.67556	0.940433	0.0181121	0.038926
ENSGALG00000010855	MTHFD2L	145.62	0.675206	0.219557	0.000410847	0.00121787
ENSGALG00000031973	ANKRD52	1448.61	0.674625	0.114921	9.74094e-10	5.82216e-09
ENSGALG00000008861	BSPRY	11.228	0.673208	0.713033	0.026183	0.0539813
ENSGALG00000008517	MCTS1	4937.57	0.672807	0.0651616	1.27559e-25	2.57484e-24
ENSGALG00000008873	POLE3	3006.36	0.672757	0.0722765	3.04807e-21	4.67602e-20
ENSGALG00000005269	INTS2	2369.49	0.67248	0.0896005	1.41705e-14	1.30732e-13
ENSGALG00000003911	CACNG5	7.26384	0.670537	0.829927	0.0234136	0.0488785
ENSGALG00000016946	SUGT1	3106.47	0.67049	0.064435	5.54602e-26	1.15123e-24
ENSGALG00000052941		6.02145	0.670451	0.780677	0.0250911	0.0519466
ENSGALG00000016844	RAB20	37.807	0.670163	0.376194	0.0114011	0.0256996
ENSGALG00000033888	IDH3B	5439.35	0.670062	0.0836264	2.63379e-16	2.78198e-15
ENSGALG00000053867		510.313	0.669444	0.140205	3.99691e-07	1.79288e-06
ENSGALG00000038167		7.82219	0.668863	0.799548	0.02466	0.0511623
ENSGALG00000040962	CPSF7	784.474	0.668834	0.10119	8.93257e-12	6.50773e-11
ENSGALG00000003569	TMEM130	94.6622	0.667839	0.272513	0.00263945	0.0067863
ENSGALG00000009228	PARP1	11751.1	0.667553	0.0811202	4.46817e-17	5.02606e-16
ENSGALG00000027887		7.75454	0.667372	0.822169	0.0239882	0.0499614
ENSGALG00000049825		1432.88	0.667216	0.0732159	1.91338e-20	2.79426e-19
ENSGALG00000006379	SHH	26.0604	0.66717	0.445314	0.0181333	0.0389612
ENSGALG00000027886	TMEM165	3884.28	0.666977	0.0698255	3.04548e-22	5.00067e-21
ENSGALG00000009642	AVEN	732.036	0.666751	0.114269	1.24187e-09	7.35441e-09
ENSGALG00000015849	ME1	1499.95	0.666262	0.0854734	1.52898e-15	1.51936e-14
ENSGALG00000050737		6.11115	0.665919	0.787609	0.0253461	0.0524303
ENSGALG00000010303		506.569	0.665729	0.119574	5.95382e-09	3.28439e-08
ENSGALG00000005931	RUVBL1	7396.23	0.665222	0.0605069	9.88705e-29	2.45016e-27
ENSGALG00000004675	RGS9BP	351.373	0.665147	0.174349	2.94943e-05	0.000103732
ENSGALG00000039097		11.6216	0.664809	0.637335	0.0274656	0.0563372
ENSGALG00000047374		30.787	0.66455	0.417646	0.0160654	0.0349656
ENSGALG00000014428	TAPBPL	300.06	0.664428	0.14794	1.58929e-06	6.60143e-06
ENSGALG00000006955	CCNJ	162.09	0.664188	0.225426	0.000650962	0.00186778
ENSGALG00000003313		1117.77	0.664044	0.0949064	6.21408e-13	5.01234e-12
ENSGALG00000045305		22.1216	0.663757	0.491535	0.0221574	0.0465455
ENSGALG00000012230	LRR1	1324.24	0.663326	0.0845375	1.02658e-15	1.0361e-14
ENSGALG00000033789	HSP90B1	27950.2	0.663269	0.0603245	9.86069e-29	2.4474e-27
ENSGALG00000013173	PYROXD1	381.363	0.663005	0.126465	3.65849e-08	1.85843e-07
ENSGALG00000003521	TPM1	36051.2	0.662702	0.0581428	1.05002e-30	2.98303e-29
ENSGALG00000029921	CSRP2	8989.67	0.662167	0.213228	0.000394802	0.00117507
ENSGALG00000009031	SESTD1	964.341	0.661574	0.0964289	1.63812e-12	1.26677e-11
ENSGALG00000041161	NT5DC4	118.713	0.661545	0.233465	0.000930422	0.00259519
ENSGALG00000031275	TUBB6	12937.6	0.661376	0.0645799	3.17769e-25	6.25749e-24
ENSGALG00000007248		692.795	0.661136	0.119292	7.0031e-09	3.83302e-08
ENSGALG00000010175	HSP90AB1	11816.4	0.661045	0.085319	2.2589e-15	2.20389e-14
ENSGALG00000004882	PPCS	2483.48	0.660441	0.0778144	5.1513e-18	6.22484e-17
ENSGALG00000052221		624.672	0.660326	0.162879	1.12678e-05	4.18399e-05
ENSGALG00000021653	IFT22	290.529	0.659958	0.171617	2.66766e-05	9.43788e-05
ENSGALG00000033781	FEN1	6893.86	0.659933	0.0667817	1.22679e-23	2.19568e-22
ENSGALG00000032730	NOP56	10601.4	0.659866	0.0900636	5.70805e-14	5.02708e-13
ENSGALG00000003958	PRMT3	1455.89	0.659675	0.0891071	3.22152e-14	2.90225e-13
ENSGALG00000036040		13.4992	0.659371	0.61375	0.0279939	0.0572968
ENSGALG00000013865	IFNGR1	1762.41	0.65888	0.106714	1.59067e-10	1.02736e-09
ENSGALG00000048013	HTD2	1151.24	0.658866	0.106123	1.2804e-10	8.35344e-10
ENSGALG00000010356	RAD54L	1084.98	0.658839	0.111559	8.36143e-10	5.02935e-09
ENSGALG00000010268		3270.8	0.658834	0.0613695	1.71826e-27	3.93709e-26
ENSGALG00000027665	SYNGR1	1086.72	0.658729	0.27438	0.00313258	0.00793889
ENSGALG00000017290		907.233	0.658552	0.120486	1.08928e-08	5.86042e-08
ENSGALG00000054259		13.4075	0.658445	0.532965	0.0254683	0.05266
ENSGALG00000007253	IL1RAP	9062.68	0.658252	0.0668745	1.81725e-23	3.22737e-22
ENSGALG00000009758	SLC7A11	21.8258	0.658084	0.429568	0.0181067	0.0389194
ENSGALG00000053979		42.0935	0.657635	0.377028	0.0129614	0.0288812
ENSGALG00000025355		10.3403	0.657413	0.638389	0.0286011	0.0583689
ENSGALG00000047535		239.31	0.657352	0.199303	0.000210139	0.00065626
ENSGALG00000015347	ZPLD1	84.5952	0.657339	0.258127	0.00215159	0.00561259
ENSGALG00000011168	C12orf29	602.572	0.657327	0.14741	1.89753e-06	7.78736e-06
ENSGALG00000030515	UBE2N	7507.23	0.656907	0.0528277	4.23603e-36	1.62462e-34
ENSGALG00000021442	CARMIL2	34.6872	0.656592	0.381937	0.0136058	0.0301545
ENSGALG00000035963	METTL18	439.895	0.656332	0.158051	7.51377e-06	2.8606e-05
ENSGALG00000015315	TRIM14	4.83107	0.656164	0.976183	0.0169226	0.0366384
ENSGALG00000026518	RUNDC3A	237.173	0.65544	0.19959	0.000222686	0.000692477
ENSGALG00000032316	CDV3	9169.88	0.654187	0.0541075	2.99854e-34	1.01685e-32
ENSGALG00000016788	IL18RAP	28.5678	0.653925	0.430865	0.0188669	0.0403596
ENSGALG00000008285	NAPEPLD	11.0307	0.653125	0.757952	0.0276856	0.0567596
ENSGALG00000043935	AFF1	2160.59	0.65277	0.104868	1.18205e-10	7.74003e-10
ENSGALG00000013091	EPS8	460.81	0.652669	0.182187	7.66125e-05	0.00025519
ENSGALG00000054222		421.19	0.652378	0.131641	1.72256e-07	8.06831e-07
ENSGALG00000001319	CAMK1G	38.7772	0.652228	0.345491	0.0102285	0.0233075
ENSGALG00000035244		272.212	0.651811	0.144002	1.4181e-06	5.92855e-06
ENSGALG00000015155	CARNMT1	2490.11	0.651732	0.071044	1.15497e-20	1.70681e-19
ENSGALG00000003108	SMG6	4422.36	0.65167	0.0608012	2.12931e-27	4.84448e-26
ENSGALG00000014974	MIB1	5731.35	0.651159	0.0877641	2.94087e-14	2.65387e-13
ENSGALG00000015289	ARMC2	55.4298	0.649378	0.32012	0.00780257	0.0182335
ENSGALG00000005451	HELLS	5195.63	0.649045	0.0737089	3.31457e-19	4.39795e-18
ENSGALG00000015257	GIN1	48.5662	0.648887	0.364514	0.0127102	0.0283488
ENSGALG00000049707	SNORD14	80.6426	0.647661	0.252333	0.00213065	0.00556427
ENSGALG00000021592	TLCD2	787.186	0.647149	0.121616	2.53702e-08	1.3115e-07
ENSGALG00000052327		7.65694	0.647095	0.813271	0.0262581	0.0541223
ENSGALG00000006225	EFL1	2703.57	0.647001	0.0724351	1.07174e-19	1.47301e-18
ENSGALG00000012185	PLA2G12A	266.998	0.646772	0.14811	3.02219e-06	1.2032e-05
ENSGALG00000048601		12.7144	0.646501	0.712569	0.0297018	0.0603248
ENSGALG00000041613	HEATR3	2502.91	0.646308	0.0743249	8.85163e-19	1.13611e-17
ENSGALG00000016278	PRIM2	1263.84	0.645801	0.106197	2.99428e-10	1.87745e-09
ENSGALG00000000433		2800.74	0.645567	0.0870292	3.03784e-14	2.73984e-13
ENSGALG00000046776		2591.15	0.64485	0.0971549	8.10436e-12	5.92309e-11
ENSGALG00000036128	ZNF407	629.176	0.644725	0.145126	2.15522e-06	8.77248e-06
ENSGALG00000008452	IFT122	877.023	0.644657	0.12747	1.05001e-07	5.04583e-07
ENSGALG00000026264	MAFA	235.492	0.644602	0.205108	0.000376974	0.00112533
ENSGALG00000033365	ALDH1A3	5212.28	0.643623	0.060005	2.00656e-27	4.57166e-26
ENSGALG00000025669	SNORA56	2.22865	0.643441	1.00734	0.0153381	0.033555
ENSGALG00000013935	BCLAF1	9581.95	0.643256	0.0665253	1.06164e-22	1.79067e-21
ENSGALG00000017227	SLC36A4	170.288	0.643021	0.232312	0.00122973	0.00336307
ENSGALG00000009476	CDK6	10460.7	0.642448	0.0587543	2.07206e-28	5.04943e-27
ENSGALG00000010034		1125.47	0.642221	0.0945504	2.83115e-12	2.15114e-11
ENSGALG00000005784	CCDC117	668.134	0.642124	0.108733	8.91883e-10	5.35263e-09
ENSGALG00000012068		186.175	0.641864	0.227786	0.00106583	0.00294634
ENSGALG00000052375		349.8	0.641696	0.164398	2.27602e-05	8.13267e-05
ENSGALG00000010536	FAF1	1197.42	0.641422	0.126606	1.01444e-07	4.88947e-07
ENSGALG00000036082	HOXC13	224.32	0.641296	0.200718	0.000320889	0.000970682
ENSGALG00000043100	SRPX	45.6189	0.640829	0.388145	0.016487	0.0357867
ENSGALG00000015591	ACOX3	513.921	0.640792	0.156183	9.91503e-06	3.70474e-05
ENSGALG00000048067	DUS2	994.04	0.639958	0.0992942	2.978e-11	2.06766e-10
ENSGALG00000016379	SMS	3094.52	0.639208	0.0815983	1.24187e-15	1.24249e-14
ENSGALG00000006934	PATZ1	252.398	0.638952	0.181728	0.000103986	0.000340656
ENSGALG00000041955	LRRC56	7.34632	0.63759	0.81178	0.027277	0.0560003
ENSGALG00000001688	2020-09-05	8688.25	0.637514	0.0915844	8.84069e-13	7.02198e-12
ENSGALG00000006564		5846.81	0.637358	0.0554297	3.59644e-31	1.04948e-29
ENSGALG00000007378	FAM162A	951.444	0.637022	0.0944911	4.0948e-12	3.06359e-11
ENSGALG00000008539	ALG12	5455.72	0.636851	0.0576575	6.18215e-29	1.5584e-27
ENSGALG00000004777	AIFM2	582.246	0.636596	0.124394	7.89426e-08	3.8592e-07
ENSGALG00000016734	SLC9A7	143.534	0.636474	0.207617	0.000503194	0.00147051
ENSGALG00000044260		2876.54	0.636442	0.0931095	2.14438e-12	1.64172e-11
ENSGALG00000015108	FXN	745.3	0.636117	0.11692	1.36603e-08	7.28612e-08
ENSGALG00000005652	DIDO1	3466.8	0.636033	0.0900225	4.21997e-13	3.45227e-12
ENSGALG00000047383		139.454	0.635923	0.27168	0.00405586	0.0100572
ENSGALG00000012953	IPO8	1247.9	0.635845	0.119956	2.96334e-08	1.51969e-07
ENSGALG00000023552	SPEF2	14.7226	0.635784	0.528812	0.0293618	0.059728
ENSGALG00000040308	BAHCC1	23756.3	0.635707	0.0512358	6.42534e-36	2.40696e-34
ENSGALG00000054704		2.8531	0.635407	1.02996	0.013995	0.0309277
ENSGALG00000002199	KLHL17	209.35	0.635146	0.212608	0.000650621	0.00186713
ENSGALG00000040194		19.0796	0.634756	0.445348	0.0235006	0.0490537
ENSGALG00000029927	STRBP	1429.61	0.634743	0.121536	4.54007e-08	2.28108e-07
ENSGALG00000030719	CLMN	764.892	0.634704	0.140515	1.58532e-06	6.58728e-06
ENSGALG00000001696	SAG	32.5252	0.633978	0.402022	0.01915	0.0409
ENSGALG00000029001	YRDC	3130.98	0.633844	0.0796568	4.70292e-16	4.85918e-15
ENSGALG00000025692		160.973	0.633747	0.215064	0.000744033	0.00211374
ENSGALG00000032937	DLGAP2	163.261	0.63339	0.237068	0.00169602	0.00450964
ENSGALG00000016920	LMO7	84.8078	0.633387	0.370979	0.0155935	0.0340445
ENSGALG00000011593	TMEM177	579.735	0.632769	0.111213	3.33093e-09	1.88593e-08
ENSGALG00000005103	GDPD1	258.893	0.632501	0.1655	3.28534e-05	0.000114745
ENSGALG00000005169	FUT11	1902.79	0.63245	0.0731807	1.48552e-18	1.87382e-17
ENSGALG00000030097	RCC1	4082.95	0.632236	0.0777597	1.1489e-16	1.24875e-15
ENSGALG00000002107	RANBP1	11362.9	0.632051	0.06674	7.56123e-22	1.2119e-20
ENSGALG00000003596	TRRAP	5106.34	0.632045	0.0746796	7.0052e-18	8.35851e-17
ENSGALG00000051378		75.8818	0.632024	0.260921	0.00335889	0.00845919
ENSGALG00000049514	C16orf89	2.28613	0.631772	1.00251	0.0158745	0.0346156
ENSGALG00000052470		2.91201	0.631474	1.02894	0.0140997	0.0311376
ENSGALG00000028471	CNPY3	4261.63	0.631457	0.101766	1.44962e-10	9.40413e-10
ENSGALG00000054223		1054.8	0.63107	0.120203	3.97186e-08	2.01254e-07
ENSGALG00000012909	C5orf22	280.075	0.630967	0.177934	9.60963e-05	0.000316225
ENSGALG00000009595	TWF1	1516.75	0.630773	0.094756	7.47582e-12	5.48363e-11
ENSGALG00000041760	CLTCL1	5277.61	0.63026	0.0915741	1.57768e-12	1.22121e-11
ENSGALG00000009320	PSEN1	908.02	0.630218	0.114031	8.59549e-09	4.66497e-08
ENSGALG00000031997	SFRP4	411.879	0.629997	0.167928	4.38561e-05	0.00015098
ENSGALG00000016316	GCM1	20.9082	0.629825	0.576399	0.0323827	0.0652108
ENSGALG00000001939	HIPK1	1563.46	0.629503	0.23344	0.0016071	0.00429236
ENSGALG00000034768	ESF1	4004.16	0.629503	0.0763687	4.56816e-17	5.13138e-16
ENSGALG00000013072	AKR1B10	2765.74	0.629274	0.0732307	2.30905e-18	2.86109e-17
ENSGALG00000018439	DLX1	9.23654	0.628917	0.7303	0.0316971	0.063982
ENSGALG00000014875	HCN1	32.6916	0.627846	0.357921	0.0147843	0.0324802
ENSGALG00000019795		632.903	0.627565	0.120458	4.99778e-08	2.50168e-07
ENSGALG00000014485	LDB2	29.6274	0.627311	0.451077	0.02546	0.0526523
ENSGALG00000032373		1024.48	0.627199	0.0948148	1.00509e-11	7.29605e-11
ENSGALG00000032740	HOXB7	1270.52	0.627175	0.113723	9.29468e-09	5.03256e-08
ENSGALG00000000352	TIMM44	3646.75	0.626624	0.0806442	2.14497e-15	2.1003e-14
ENSGALG00000036300	SEC61A2	4135.26	0.625294	0.088323	3.95467e-13	3.25009e-12
ENSGALG00000029469		34.8848	0.62524	0.417487	0.0224372	0.047072
ENSGALG00000001483		1898.46	0.624569	0.0699906	1.25286e-19	1.71317e-18
ENSGALG00000049853	VAMP1	93.1085	0.624513	0.274227	0.00499654	0.0121669
ENSGALG00000011643	UTP20	3641.61	0.624463	0.0893342	7.52705e-13	6.02913e-12
ENSGALG00000043787	DEPDC6	541.995	0.624254	0.160951	2.70031e-05	9.54502e-05
ENSGALG00000009915	EML4	7818.08	0.623517	0.107659	1.8912e-09	1.09699e-08
ENSGALG00000040844	GIT2	5423.92	0.623311	0.106131	1.16297e-09	6.89988e-09
ENSGALG00000030344	ISYNA1	767.074	0.622734	0.123426	1.21435e-07	5.79904e-07
ENSGALG00000026401	FAM104A	2197.31	0.622205	0.0699473	1.62986e-19	2.20805e-18
ENSGALG00000006507	CLMP	15218.4	0.622125	0.0598247	7.04245e-26	1.44325e-24
ENSGALG00000016792	MFSD9	246.345	0.622087	0.186151	0.000209379	0.000654254
ENSGALG00000010016	SOCS5	7573.82	0.621896	0.0895246	1.03464e-12	8.16558e-12
ENSGALG00000007041	HDX	358.656	0.621728	0.141993	3.16028e-06	1.256e-05
ENSGALG00000011180	FAM120B	1100.48	0.621708	0.148033	7.0255e-06	2.68358e-05
ENSGALG00000015000	LYAR	5022.58	0.621619	0.0802216	2.58521e-15	2.50707e-14
ENSGALG00000007557	RUBCN	1380.28	0.621469	0.0865375	1.91399e-13	1.61248e-12
ENSGALG00000006851		7545.62	0.621454	0.105593	1.08691e-09	6.47002e-09
ENSGALG00000003213	LGALS2	878.513	0.620768	0.129835	4.68006e-07	2.0848e-06
ENSGALG00000044730		135.854	0.620282	0.220879	0.00120583	0.0033022
ENSGALG00000005417	JMJD4	2369.09	0.620192	0.0961267	3.06009e-11	2.12373e-10
ENSGALG00000004066	HTR6	46.7036	0.619945	0.311766	0.00978897	0.0224074
ENSGALG00000010244	AKR1A1	3256.16	0.619756	0.0627443	1.47655e-23	2.63683e-22
ENSGALG00000001653	MANEAL	319.761	0.619398	0.18323	0.000184556	0.000581426
ENSGALG00000052156		52.7413	0.619067	0.350954	0.0151772	0.0332618
ENSGALG00000029537	SNUPN	3504.36	0.618791	0.0999265	1.64335e-10	1.05757e-09
ENSGALG00000003891	ZNF423	1508.7	0.618781	0.0842751	5.88717e-14	5.17351e-13
ENSGALG00000021685	SERINC2	1178.36	0.618697	0.0783447	8.04239e-16	8.1733e-15
ENSGALG00000032042		959.443	0.61869	0.112444	1.03073e-08	5.56029e-08
ENSGALG00000052736		22.7084	0.618645	0.463036	0.0283183	0.0578578
ENSGALG00000026507	FDX1	2076.59	0.618441	0.0763738	1.58327e-16	1.70022e-15
ENSGALG00000009052	LBH	82321.1	0.61824	0.0665293	4.27259e-21	6.51732e-20
ENSGALG00000026999	SNRPB2	5911.29	0.618213	0.0672691	1.1144e-20	1.64838e-19
ENSGALG00000014841	HDDC2	1544.36	0.618152	0.0882665	7.0137e-13	5.62913e-12
ENSGALG00000023616	LRRC31	318.785	0.617962	0.14306	4.1876e-06	1.64041e-05
ENSGALG00000043047	SOBP	348.274	0.617402	0.143708	4.66046e-06	1.8199e-05
ENSGALG00000015193	CCDC80	9517.78	0.617382	0.0661332	2.86711e-21	4.41524e-20
ENSGALG00000005619	F3	2.87583	0.61716	1.01749	0.0150305	0.0329716
ENSGALG00000052929		142.828	0.616957	0.221717	0.00132043	0.00358677
ENSGALG00000002618	KCTD7	198.787	0.616711	0.285485	0.00682888	0.0161717
ENSGALG00000051123		2.85033	0.616322	1.01628	0.0151265	0.0331642
ENSGALG00000010316		216.277	0.616008	0.161312	3.55142e-05	0.000123476
ENSGALG00000010222		6.23289	0.615848	0.772262	0.031713	0.0640061
ENSGALG00000015464	PTGFRN	841.715	0.615718	0.191136	0.000326729	0.00098631
ENSGALG00000049405		42.9852	0.614981	0.499512	0.031946	0.0643957
ENSGALG00000023749	DARS2	741.119	0.614819	0.109626	5.70401e-09	3.1509e-08
ENSGALG00000044071	ABI3	76.271	0.614534	0.290679	0.00765787	0.0179318
ENSGALG00000001546	ZZEF1	3063.14	0.614364	0.0889578	1.41317e-12	1.10021e-11
ENSGALG00000049316		67.1148	0.614339	0.320679	0.0116625	0.0262226
ENSGALG00000030363	IFNAR1	1717.37	0.613827	0.0695047	2.97538e-19	3.96094e-18
ENSGALG00000028039	AVR2	2.76815	0.613636	1.01152	0.0155042	0.0338725
ENSGALG00000035387	TMEM240	2.76815	0.613636	1.01152	0.0155042	0.0338725
ENSGALG00000001547	CAPZA1	6519.22	0.613565	0.0601806	6.02206e-25	1.17012e-23
ENSGALG00000005156		248.145	0.613559	0.214903	0.00107745	0.00297541
ENSGALG00000021340	CA9	75.7211	0.613548	0.317076	0.0112638	0.0254186
ENSGALG00000054326		32.7383	0.613226	0.431074	0.0263272	0.0542508
ENSGALG00000032845	ASB10	2.7615	0.613023	1.01085	0.0155606	0.0339818
ENSGALG00000003509	SPACA9	31.1184	0.61298	0.359187	0.0172896	0.0373428
ENSGALG00000013759	MRPL47	2511.83	0.612909	0.0852424	1.85117e-13	1.56037e-12
ENSGALG00000034426		826.496	0.612841	0.128367	4.99331e-07	2.21699e-06
ENSGALG00000002048	GPRIN2	11.8049	0.612839	0.62422	0.0363608	0.0722639
ENSGALG00000040784	RAB39B	2208.25	0.612675	0.131127	8.22139e-07	3.54471e-06
ENSGALG00000033568	TMEM70	2263.62	0.612185	0.0675712	3.78641e-20	5.42256e-19
ENSGALG00000043797	DBR1	5797.37	0.611982	0.0519535	1.45666e-32	4.60077e-31
ENSGALG00000040373	EXOSC2	4253.37	0.61126	0.0606291	1.93723e-24	3.64969e-23
ENSGALG00000004357	ANXA6	30.2139	0.611232	0.398952	0.0229549	0.048033
ENSGALG00000016945	LECT1	8.24288	0.610766	0.683456	0.0359444	0.07156
ENSGALG00000012687	TPMT	743.699	0.61073	0.132942	1.20718e-06	5.10107e-06
ENSGALG00000000863	DYRK3	266.578	0.610312	0.194222	0.000436302	0.00128552
ENSGALG00000034264		1344.83	0.610111	0.0803456	9.01593e-15	8.46321e-14
ENSGALG00000020813	CCDC50	6791.94	0.61002	0.127106	4.45456e-07	1.9893e-06
ENSGALG00000012239	METAP1	2572.47	0.609819	0.111113	1.15167e-08	6.1796e-08
ENSGALG00000037611		525.963	0.609443	0.141667	4.68329e-06	1.82837e-05
ENSGALG00000042551		25.8725	0.60874	0.557184	0.0361963	0.0719993
ENSGALG00000021399		24.7174	0.608445	0.55565	0.0362114	0.072009
ENSGALG00000014887	ASF1A	1894.18	0.607909	0.0897687	3.68666e-12	2.76981e-11
ENSGALG00000030466	CS	7781.92	0.607704	0.0635839	3.55646e-22	5.81599e-21
[truncated: 1,716 more rows]
